# Supplementary material for: RNA structural dynamics regulate early embryogenesis through controlling transcriptome fate and function
Source: Genome Biol. 2020 May 18;21:120. doi: 10.1186/s13059-020-02022-2 (PMC7236375; doi:10.1186/s13059-020-02022-2)
Supplement: Supplementary file 4 — Table S3. Structurally variable regions between neighboring stages and hot structurally variable regions. [file 13059_2020_2022_MOESM4_ESM.xlsx]

## Sheet: 0hpf->0.4hpf
Table S3. Structurally variable regions between neighboring stages and hot structurally variable regions
TransID	start(0-based)	end(0-based)	region
NM_001001399	61	89	utr5
NM_001001399	91	119	utr5
NM_001001399	91	119	cds
NM_001001399	121	151	cds
NM_001001399	221	249	cds
NM_001001399	251	281	cds
NM_001001399	282	311	cds
NM_001001399	641	669	utr3
NM_001001399	641	669	cds
NM_001001399	671	699	utr3
NM_001001399	831	859	utr3
NM_001001399	861	891	utr3
NM_001001399	901	931	utr3
NM_001001399	932	961	utr3
NM_001001399	962	991	utr3
NM_001001399	992	1021	utr3
NM_001001402	631	659	cds
NM_001001402	1121	1149	cds
NM_001001402	1421	1449	cds
NM_001001402	1501	1529	cds
NM_001001402	1661	1691	cds
NM_001001402	1781	1809	cds
NM_001001402	1831	1861	cds
NM_001001402	1862	1891	cds
NM_001001402	2051	2079	utr3
NM_001001402	2181	2209	utr3
NM_001001402	2221	2251	utr3
NM_001001402	2252	2281	utr3
NM_001001402	2291	2319	utr3
NM_001001402	2321	2349	utr3
NM_001001402	2391	2419	utr3
NM_001001402	2511	2541	utr3
NM_001001402	2681	2711	utr3
NM_001001402	2712	2741	utr3
NM_001001402	2771	2799	utr3
NM_001001402	2881	2911	utr3
NM_001001402	2912	2941	utr3
NM_001001402	2961	2991	utr3
NM_001001402	3041	3069	utr3
NM_001001402	3131	3159	utr3
NM_001001589	161	189	cds
NM_001001589	1371	1399	cds
NM_001001589	1401	1429	utr3
NM_001001589	1401	1429	cds
NM_001001589	1461	1489	utr3
NM_001001590	111	139	cds
NM_001001590	151	181	cds
NM_001001590	182	211	cds
NM_001001590	212	241	cds
NM_001001590	241	269	cds
NM_001001590	271	299	cds
NM_001001590	361	391	cds
NM_001001590	392	421	cds
NM_001001590	491	521	cds
NM_001001590	541	571	cds
NM_001001590	572	601	cds
NM_001001590	611	641	cds
NM_001001590	651	679	cds
NM_001001590	861	891	cds
NM_001001590	892	921	cds
NM_001001590	931	959	cds
NM_001001590	991	1021	cds
NM_001001590	1022	1051	cds
NM_001001590	1052	1081	cds
NM_001001590	1071	1101	cds
NM_001001590	1102	1131	cds
NM_001001590	1132	1161	cds
NM_001001590	1162	1191	cds
NM_001001590	1231	1261	cds
NM_001001590	1262	1291	cds
NM_001001590	1281	1311	utr3
NM_001001590	1281	1311	cds
NM_001001590	1312	1341	utr3
NM_001001593	1	31	utr5
NM_001001593	1	31	cds
NM_001001593	32	61	cds
NM_001001593	161	191	cds
NM_001001593	192	221	cds
NM_001001593	221	251	cds
NM_001001593	252	281	cds
NM_001001593	291	319	cds
NM_001001593	351	379	cds
NM_001001724	51	81	utr5
NM_001001724	82	111	utr5
NM_001001724	721	751	utr3
NM_001001724	752	781	utr3
NM_001001724	801	831	utr3
NM_001001724	1141	1169	utr3
NM_001001729	941	969	utr3
NM_001001729	1191	1221	utr3
NM_001001729	1222	1251	utr3
NM_001001729	2261	2289	utr3
NM_001001729	2431	2459	utr3
NM_001001729	2461	2489	utr3
NM_001001818	31	59	utr5
NM_001001818	91	119	utr5
NM_001001818	201	229	utr5
NM_001001818	381	409	utr5
NM_001001818	411	439	utr5
NM_001001818	451	479	utr5
NM_001001818	491	521	utr5
NM_001001818	522	551	utr5
NM_001001818	522	551	cds
NM_001001818	631	661	cds
NM_001001818	662	691	cds
NM_001001818	721	751	cds
NM_001001818	871	901	cds
NM_001001818	1021	1051	cds
NM_001001818	1052	1081	cds
NM_001001818	1271	1299	cds
NM_001001818	1311	1339	cds
NM_001001818	1351	1379	cds
NM_001001818	1391	1421	cds
NM_001001818	1422	1451	cds
NM_001001818	1491	1519	cds
NM_001001818	1541	1569	cds
NM_001001818	1611	1639	utr3
NM_001001818	1671	1699	utr3
NM_001001818	1701	1731	utr3
NM_001001818	1732	1761	utr3
NM_001001818	1771	1801	utr3
NM_001001818	1802	1831	utr3
NM_001001818	1832	1861	utr3
NM_001001818	1961	1989	utr3
NM_001001818	2031	2061	utr3
NM_001001818	2062	2091	utr3
NM_001001818	2201	2229	utr3
NM_001001818	2281	2311	utr3
NM_001001818	2312	2341	utr3
NM_001001818	2342	2371	utr3
NM_001001818	2372	2401	utr3
NM_001001818	2402	2431	utr3
NM_001001818	2421	2451	utr3
NM_001001818	2452	2481	utr3
NM_001001818	2482	2511	utr3
NM_001001818	2512	2541	utr3
NM_001001818	2542	2571	utr3
NM_001001819	1	31	utr5
NM_001001819	1	31	cds
NM_001001819	32	61	cds
NM_001001819	131	159	cds
NM_001001819	281	309	cds
NM_001001819	361	391	cds
NM_001001819	401	431	cds
NM_001001819	432	461	utr3
NM_001001819	432	461	cds
NM_001001822	301	331	utr5
NM_001001822	501	529	utr5
NM_001001822	631	659	cds
NM_001001822	771	799	cds
NM_001001822	861	891	cds
NM_001001822	961	991	cds
NM_001001822	992	1021	cds
NM_001001822	1031	1059	cds
NM_001001822	1081	1111	cds
NM_001001822	1112	1141	cds
NM_001001822	1141	1171	cds
NM_001001822	1172	1201	cds
NM_001001822	1331	1359	cds
NM_001001822	1391	1421	cds
NM_001001822	1422	1451	cds
NM_001001822	1451	1479	cds
NM_001001822	1501	1529	cds
NM_001001822	1581	1609	cds
NM_001001822	1621	1651	cds
NM_001001822	1671	1699	cds
NM_001001822	1701	1731	cds
NM_001001822	1732	1761	cds
NM_001001822	1762	1791	cds
NM_001001822	1801	1831	utr3
NM_001001822	1832	1861	utr3
NM_001001822	1861	1889	utr3
NM_001001822	1941	1971	utr3
NM_001001822	2021	2049	utr3
NM_001001822	2191	2219	utr3
NM_001001822	2271	2299	utr3
NM_001001822	2371	2401	utr3
NM_001001822	2402	2431	utr3
NM_001001822	2432	2461	utr3
NM_001001822	2461	2491	utr3
NM_001001822	2492	2521	utr3
NM_001001823	1971	2001	cds
NM_001001823	2002	2031	cds
NM_001001823	2141	2171	cds
NM_001001823	2172	2201	cds
NM_001001823	2251	2279	cds
NM_001001823	2471	2501	utr3
NM_001001823	2502	2531	utr3
NM_001001823	2531	2559	utr3
NM_001001823	2561	2589	utr3
NM_001001828	661	691	cds
NM_001001828	741	769	cds
NM_001001828	881	909	cds
NM_001001828	981	1011	cds
NM_001001828	1012	1041	cds
NM_001001828	1151	1179	utr3
NM_001001828	1151	1179	cds
NM_001001830	81	111	utr5
NM_001001830	112	141	utr5
NM_001001830	142	171	utr5
NM_001001830	191	221	utr5
NM_001001830	271	301	utr5
NM_001001830	331	359	utr5
NM_001001830	391	421	utr5
NM_001001830	422	451	utr5
NM_001001830	451	481	utr5
NM_001001830	482	511	utr5
NM_001001830	482	511	cds
NM_001001830	531	561	cds
NM_001001830	562	591	cds
NM_001001830	601	631	cds
NM_001001830	632	661	cds
NM_001001830	781	809	cds
NM_001001830	821	851	cds
NM_001001830	852	881	cds
NM_001001830	881	909	cds
NM_001001830	931	959	cds
NM_001001830	961	991	cds
NM_001001830	992	1021	cds
NM_001001830	1041	1071	cds
NM_001001830	1081	1109	cds
NM_001001830	1111	1139	cds
NM_001001830	1241	1271	cds
NM_001001830	1381	1409	cds
NM_001001830	1521	1551	cds
NM_001001830	1552	1581	cds
NM_001001830	1691	1721	utr3
NM_001001830	1722	1751	utr3
NM_001001830	1752	1781	utr3
NM_001001830	1782	1811	utr3
NM_001001830	1891	1919	utr3
NM_001001830	1991	2019	utr3
NM_001001830	2021	2051	utr3
NM_001001830	2052	2081	utr3
NM_001001830	2082	2111	utr3
NM_001001830	2112	2141	utr3
NM_001001830	2201	2231	utr3
NM_001001830	2232	2261	utr3
NM_001001830	2262	2291	utr3
NM_001001830	2311	2341	utr3
NM_001001830	2342	2371	utr3
NM_001001830	2371	2401	utr3
NM_001001830	2441	2469	utr3
NM_001001830	2551	2579	utr3
NM_001001830	2611	2641	utr3
NM_001001830	2642	2671	utr3
NM_001001830	2661	2691	utr3
NM_001001830	2791	2821	utr3
NM_001001830	2822	2851	utr3
NM_001001830	2852	2881	utr3
NM_001001830	2882	2911	utr3
NM_001001830	2912	2941	utr3
NM_001001830	2991	3021	utr3
NM_001001830	3051	3079	utr3
NM_001001830	3081	3109	utr3
NM_001001830	3141	3171	utr3
NM_001001830	3172	3201	utr3
NM_001001830	3291	3321	utr3
NM_001001830	3322	3351	utr3
NM_001001830	3352	3381	utr3
NM_001001830	3421	3451	utr3
NM_001001830	3452	3481	utr3
NM_001001830	3521	3549	utr3
NM_001001830	3551	3581	utr3
NM_001001830	3582	3611	utr3
NM_001001830	3612	3641	utr3
NM_001001830	3642	3671	utr3
NM_001001830	3691	3721	utr3
NM_001001830	3722	3751	utr3
NM_001001832	261	291	cds
NM_001001832	381	409	cds
NM_001001832	431	459	cds
NM_001001832	511	539	cds
NM_001001832	631	661	cds
NM_001001832	662	691	cds
NM_001001832	761	789	cds
NM_001001832	961	989	cds
NM_001001832	1051	1079	cds
NM_001001832	1121	1149	cds
NM_001001832	1241	1271	cds
NM_001001832	1301	1331	cds
NM_001001832	1332	1361	cds
NM_001001832	1381	1409	utr3
NM_001001840	341	369	cds
NM_001001840	461	491	cds
NM_001001840	492	521	cds
NM_001001840	871	899	cds
NM_001001840	991	1019	cds
NM_001001840	1091	1119	cds
NM_001001840	1201	1229	cds
NM_001001840	1461	1489	cds
NM_001001840	1541	1569	cds
NM_001001840	1791	1821	cds
NM_001001840	1822	1851	cds
NM_001001840	1851	1879	cds
NM_001001840	1951	1979	cds
NM_001001840	2041	2069	cds
NM_001001840	2101	2129	cds
NM_001001840	2171	2199	cds
NM_001001840	2261	2289	cds
NM_001001840	2291	2321	cds
NM_001001840	2322	2351	cds
NM_001001840	2341	2371	cds
NM_001001840	2372	2401	cds
NM_001001840	2402	2431	cds
NM_001001840	2431	2461	cds
NM_001001840	2511	2539	cds
NM_001001840	2551	2581	cds
NM_001001840	2582	2611	cds
NM_001001840	2791	2821	cds
NM_001001840	2822	2851	cds
NM_001001840	2851	2879	cds
NM_001001840	2881	2909	cds
NM_001001840	2961	2989	utr3
NM_001001840	3021	3051	utr3
NM_001001840	3052	3081	utr3
NM_001001840	3141	3169	utr3
NM_001001840	3171	3199	utr3
NM_001001840	3201	3231	utr3
NM_001001840	3232	3261	utr3
NM_001001840	3391	3421	utr3
NM_001001844	3421	3449	utr3
NM_001001886	161	191	utr5
NM_001001886	161	191	cds
NM_001001886	192	221	cds
NM_001001886	231	259	cds
NM_001001886	331	361	cds
NM_001001886	362	391	cds
NM_001001886	392	421	cds
NM_001001886	431	459	cds
NM_001001886	501	529	cds
NM_001001886	531	561	cds
NM_001001886	562	591	cds
NM_001001886	651	681	cds
NM_001001886	682	711	cds
NM_001001886	751	779	cds
NM_001001886	781	809	cds
NM_001001886	871	899	cds
NM_001001886	921	951	cds
NM_001001886	1041	1069	cds
NM_001001886	1071	1101	cds
NM_001001886	1102	1131	cds
NM_001001886	1132	1161	cds
NM_001001886	1201	1229	cds
NM_001001886	1231	1261	cds
NM_001001886	1262	1291	cds
NM_001001886	1292	1321	cds
NM_001001886	1421	1449	cds
NM_001001886	1561	1589	cds
NM_001001886	1661	1691	cds
NM_001001886	1692	1721	cds
NM_001001886	1722	1751	cds
NM_001001886	1741	1769	cds
NM_001001886	1811	1841	cds
NM_001001886	1842	1871	cds
NM_001001886	1872	1901	cds
NM_001001886	1891	1919	cds
NM_001001886	1951	1981	cds
NM_001001886	1982	2011	cds
NM_001001886	2011	2041	cds
NM_001001886	2091	2121	cds
NM_001001886	2122	2151	cds
NM_001001886	2152	2181	cds
NM_001001886	2351	2381	cds
NM_001001886	2382	2411	cds
NM_001001886	2412	2441	cds
NM_001001886	2431	2461	cds
NM_001001886	2462	2491	cds
NM_001001886	2481	2511	cds
NM_001001886	2521	2549	cds
NM_001001886	2561	2589	cds
NM_001001886	2591	2621	cds
NM_001001886	2701	2731	cds
NM_001001886	2741	2771	cds
NM_001001886	2772	2801	cds
NM_001001886	2802	2831	cds
NM_001001886	2831	2861	cds
NM_001001886	2871	2899	cds
NM_001001886	2941	2971	cds
NM_001001886	2972	3001	cds
NM_001001886	3002	3031	cds
NM_001001886	3021	3051	cds
NM_001001886	3052	3081	cds
NM_001001886	3191	3221	cds
NM_001001886	3222	3251	cds
NM_001001886	3252	3281	cds
NM_001001886	3351	3381	cds
NM_001001886	3382	3411	utr3
NM_001001886	3382	3411	cds
NM_001001886	3412	3441	utr3
NM_001001886	3442	3471	utr3
NM_001001886	3472	3501	utr3
NM_001001886	3501	3529	utr3
NM_001001886	3561	3591	utr3
NM_001001886	3691	3721	utr3
NM_001001886	3722	3751	utr3
NM_001001886	3801	3831	utr3
NM_001001886	3832	3861	utr3
NM_001001886	3901	3931	utr3
NM_001001886	3932	3961	utr3
NM_001001886	3961	3991	utr3
NM_001001889	1	31	utr5
NM_001001889	32	61	utr5
NM_001001889	71	101	utr5
NM_001001889	102	131	utr5
NM_001001889	132	161	utr5
NM_001001889	162	191	utr5
NM_001001889	162	191	cds
NM_001001889	211	239	cds
NM_001001889	281	311	cds
NM_001001889	312	341	cds
NM_001001889	471	499	cds
NM_001001889	501	529	cds
NM_001001889	571	599	cds
NM_001001889	601	631	cds
NM_001001889	632	661	cds
NM_001001889	661	691	cds
NM_001001889	781	809	cds
NM_001001889	831	859	cds
NM_001001889	1011	1039	cds
NM_001001889	1041	1071	cds
NM_001001889	1072	1101	cds
NM_001001889	1111	1139	cds
NM_001001889	1141	1171	cds
NM_001001889	1321	1351	cds
NM_001001889	1361	1389	cds
NM_001001889	1411	1439	cds
NM_001001889	1551	1581	cds
NM_001001889	1582	1611	cds
NM_001001889	1612	1641	cds
NM_001001889	1651	1681	cds
NM_001001889	1821	1851	cds
NM_001001889	1852	1881	cds
NM_001001889	1921	1949	cds
NM_001001889	1991	2021	cds
NM_001001889	2022	2051	cds
NM_001001889	2041	2071	cds
NM_001001889	2072	2101	cds
NM_001001889	2102	2131	cds
NM_001001889	2131	2159	cds
NM_001001889	2161	2189	cds
NM_001001889	2211	2241	cds
NM_001001889	2242	2271	cds
NM_001001889	2281	2311	cds
NM_001001889	2312	2341	cds
NM_001001940	61	91	utr5
NM_001001940	61	91	cds
NM_001001940	391	421	cds
NM_001001940	422	451	cds
NM_001001940	441	469	cds
NM_001001940	481	509	cds
NM_001001940	521	551	cds
NM_001001940	552	581	cds
NM_001001940	631	659	cds
NM_001001940	711	741	cds
NM_001001940	761	791	cds
NM_001001940	792	821	cds
NM_001001940	811	839	cds
NM_001001940	841	871	cds
NM_001001940	872	901	cds
NM_001001940	901	929	cds
NM_001001940	971	999	cds
NM_001001940	1091	1119	cds
NM_001001940	1121	1149	cds
NM_001001940	1151	1181	cds
NM_001001940	1182	1211	cds
NM_001001940	1271	1301	cds
NM_001001940	1302	1331	cds
NM_001001940	1431	1459	cds
NM_001001940	1481	1511	cds
NM_001001940	1512	1541	cds
NM_001001940	1661	1689	cds
NM_001001940	1711	1739	cds
NM_001001940	1841	1869	cds
NM_001001940	1891	1921	cds
NM_001001940	1922	1951	cds
NM_001001940	1971	2001	cds
NM_001001940	2002	2031	cds
NM_001001940	2201	2229	cds
NM_001001940	2531	2559	cds
NM_001001940	2691	2721	cds
NM_001001940	2722	2751	cds
NM_001001940	2811	2839	cds
NM_001001940	2881	2909	utr3
NM_001001940	2881	2909	cds
NM_001001940	2921	2949	utr3
NM_001001940	2991	3019	utr3
NM_001001940	3071	3101	utr3
NM_001001940	3102	3131	utr3
NM_001001941	1231	1259	cds
NM_001001941	1701	1729	cds
NM_001001941	1931	1959	cds
NM_001001941	2171	2199	cds
NM_001001941	2201	2229	cds
NM_001001941	2261	2289	cds
NM_001001941	2401	2429	cds
NM_001001941	2791	2821	cds
NM_001001941	2822	2851	cds
NM_001001941	2851	2879	cds
NM_001001941	2881	2911	cds
NM_001001941	2912	2941	cds
NM_001001941	3011	3039	cds
NM_001001941	3101	3131	cds
NM_001001941	3132	3161	cds
NM_001001941	3171	3201	cds
NM_001001941	3211	3241	cds
NM_001001941	3242	3271	cds
NM_001001941	3272	3301	cds
NM_001001941	3371	3399	cds
NM_001001941	3471	3501	cds
NM_001001941	3502	3531	cds
NM_001001941	3551	3579	cds
NM_001001941	3611	3639	cds
NM_001001941	3671	3701	cds
NM_001001941	3702	3731	cds
NM_001001941	3761	3789	cds
NM_001001941	3841	3869	utr3
NM_001001941	3911	3941	utr3
NM_001001941	3942	3971	utr3
NM_001001941	3972	4001	utr3
NM_001001941	4021	4049	utr3
NM_001001943	51	79	utr5
NM_001001943	81	109	utr5
NM_001001943	331	361	cds
NM_001001943	431	461	cds
NM_001001943	462	491	cds
NM_001001943	501	529	cds
NM_001001943	531	559	cds
NM_001001943	1211	1239	cds
NM_001001943	1431	1461	cds
NM_001001943	1591	1619	cds
NM_001001943	1661	1691	cds
NM_001001943	1801	1831	cds
NM_001001943	1861	1889	cds
NM_001001943	1921	1949	cds
NM_001001943	2031	2059	cds
NM_001001943	2071	2099	cds
NM_001001943	2121	2149	cds
NM_001001943	2161	2191	cds
NM_001001943	2192	2221	cds
NM_001001943	2231	2259	cds
NM_001001943	2341	2371	utr3
NM_001001943	2341	2371	cds
NM_001001943	2372	2401	utr3
NM_001001943	2401	2429	utr3
NM_001001943	2441	2471	utr3
NM_001001943	2472	2501	utr3
NM_001001943	2491	2519	utr3
NM_001001943	2641	2671	utr3
NM_001001943	2701	2729	utr3
NM_001001943	2751	2781	utr3
NM_001001943	2782	2811	utr3
NM_001001943	2851	2881	utr3
NM_001001943	2981	3009	utr3
NM_001001943	3061	3091	utr3
NM_001001943	3092	3121	utr3
NM_001001943	3122	3151	utr3
NM_001001943	3271	3299	utr3
NM_001001943	3301	3331	utr3
NM_001001943	3341	3369	utr3
NM_001001943	3401	3429	utr3
NM_001001943	3451	3479	utr3
NM_001001943	3491	3521	utr3
NM_001001943	3522	3551	utr3
NM_001001943	3551	3579	utr3
NM_001001943	3731	3761	utr3
NM_001001943	3801	3829	utr3
NM_001001943	3881	3909	utr3
NM_001001943	4301	4331	utr3
NM_001001944	81	111	utr5
NM_001001944	112	141	utr5
NM_001001944	151	179	utr5
NM_001001944	311	339	cds
NM_001001944	351	379	cds
NM_001001944	441	469	cds
NM_001001944	551	581	cds
NM_001001944	591	621	cds
NM_001001944	821	849	cds
NM_001001944	881	911	cds
NM_001001944	931	961	cds
NM_001001944	962	991	cds
NM_001001944	1001	1029	cds
NM_001001944	1031	1059	cds
NM_001001944	1061	1089	cds
NM_001001944	1091	1119	cds
NM_001001944	1151	1181	cds
NM_001001944	1511	1539	cds
NM_001001944	1561	1589	cds
NM_001001944	1591	1619	cds
NM_001001944	1651	1681	cds
NM_001001944	1682	1711	cds
NM_001001944	1841	1869	cds
NM_001001944	1901	1931	cds
NM_001001944	2041	2071	cds
NM_001001944	2072	2101	cds
NM_001001944	2201	2231	cds
NM_001001944	2232	2261	cds
NM_001001944	2301	2329	cds
NM_001001944	2351	2379	cds
NM_001001944	2421	2449	cds
NM_001001944	2571	2599	cds
NM_001001944	2641	2669	cds
NM_001001944	2771	2801	cds
NM_001001944	2802	2831	cds
NM_001001944	2891	2921	cds
NM_001001944	2922	2951	cds
NM_001001944	3021	3049	cds
NM_001001944	3111	3141	utr3
NM_001001944	3142	3171	utr3
NM_001001944	3172	3201	utr3
NM_001001944	3251	3281	utr3
NM_001001944	3282	3311	utr3
NM_001001944	3531	3561	utr3
NM_001001944	3562	3591	utr3
NM_001001944	3681	3709	utr3
NM_001001944	3751	3781	utr3
NM_001001944	3782	3811	utr3
NM_001001944	3821	3849	utr3
NM_001001944	3981	4009	utr3
NM_001001948	21	49	cds
NM_001001948	51	79	cds
NM_001001948	101	131	cds
NM_001001948	132	161	cds
NM_001001948	241	269	cds
NM_001001948	451	481	cds
NM_001001948	482	511	cds
NM_001001948	512	541	cds
NM_001001948	691	719	cds
NM_001001948	791	819	cds
NM_001001948	841	869	cds
NM_001001948	901	931	cds
NM_001001948	932	961	cds
NM_001001948	962	991	cds
NM_001001948	1011	1039	cds
NM_001001948	1051	1079	cds
NM_001001948	1161	1191	cds
NM_001001948	1221	1249	cds
NM_001001948	1271	1299	cds
NM_001001948	1301	1331	cds
NM_001001948	1332	1361	cds
NM_001001948	1362	1391	cds
NM_001001948	1411	1441	cds
NM_001001948	1442	1471	cds
NM_001001948	1472	1501	cds
NM_001001948	1521	1549	cds
NM_001002013	1781	1811	cds
NM_001002013	1812	1841	cds
NM_001002013	2161	2191	cds
NM_001002013	2201	2229	cds
NM_001002013	2281	2311	cds
NM_001002013	2401	2429	cds
NM_001002013	2531	2559	cds
NM_001002013	2581	2609	cds
NM_001002013	2651	2679	cds
NM_001002013	2721	2751	cds
NM_001002013	2752	2781	cds
NM_001002013	2801	2829	cds
NM_001002013	2881	2911	cds
NM_001002013	2971	2999	utr3
NM_001002013	3041	3071	utr3
NM_001002013	3072	3101	utr3
NM_001002013	3102	3131	utr3
NM_001002013	3132	3161	utr3
NM_001002037	201	229	cds
NM_001002037	291	319	cds
NM_001002037	371	401	cds
NM_001002037	551	579	cds
NM_001002037	881	909	cds
NM_001002037	971	999	cds
NM_001002037	1081	1111	cds
NM_001002037	1161	1189	cds
NM_001002037	1661	1689	cds
NM_001002037	1721	1749	cds
NM_001002037	1801	1829	cds
NM_001002037	1881	1909	cds
NM_001002037	2021	2051	utr3
NM_001002037	2021	2051	cds
NM_001002041	61	89	utr5
NM_001002041	151	179	cds
NM_001002041	231	259	cds
NM_001002041	261	289	cds
NM_001002041	371	399	cds
NM_001002041	501	529	cds
NM_001002041	661	689	cds
NM_001002041	991	1021	cds
NM_001002041	1022	1051	cds
NM_001002041	1201	1229	cds
NM_001002041	1231	1261	cds
NM_001002041	1262	1291	cds
NM_001002041	1301	1329	cds
NM_001002041	1341	1369	cds
NM_001002041	1411	1439	cds
NM_001002041	1551	1579	cds
NM_001002041	1691	1719	cds
NM_001002041	2061	2089	cds
NM_001002041	2241	2269	cds
NM_001002041	2271	2299	cds
NM_001002041	2311	2339	cds
NM_001002041	2431	2459	utr3
NM_001002041	2491	2519	utr3
NM_001002042	41	71	cds
NM_001002042	72	101	cds
NM_001002042	171	199	cds
NM_001002042	371	399	cds
NM_001002042	481	509	cds
NM_001002042	511	539	cds
NM_001002042	671	701	cds
NM_001002042	702	731	cds
NM_001002042	741	769	cds
NM_001002042	981	1011	cds
NM_001002042	1012	1041	cds
NM_001002042	1221	1249	cds
NM_001002042	1321	1351	cds
NM_001002042	1352	1381	cds
NM_001002042	1501	1531	cds
NM_001002042	1532	1561	cds
NM_001002042	1761	1791	cds
NM_001002042	1792	1821	cds
NM_001002042	1931	1959	cds
NM_001002042	2111	2141	cds
NM_001002042	2142	2171	cds
NM_001002042	2172	2201	cds
NM_001002042	2202	2231	cds
NM_001002042	2321	2349	cds
NM_001002042	2441	2471	cds
NM_001002042	2541	2569	cds
NM_001002042	2671	2701	cds
NM_001002042	2702	2731	cds
NM_001002042	2921	2951	cds
NM_001002042	2952	2981	cds
NM_001002042	3021	3049	cds
NM_001002042	3161	3189	cds
NM_001002042	3251	3281	cds
NM_001002042	3301	3331	cds
NM_001002042	3371	3399	cds
NM_001002042	3431	3459	cds
NM_001002042	3491	3521	cds
NM_001002042	3522	3551	cds
NM_001002042	3581	3611	cds
NM_001002042	3641	3671	cds
NM_001002042	3672	3701	cds
NM_001002042	3741	3771	cds
NM_001002042	3791	3819	cds
NM_001002047	971	999	utr3
NM_001002047	1001	1029	utr3
NM_001002050	21	51	utr5
NM_001002050	52	81	utr5
NM_001002050	82	111	utr5
NM_001002050	112	141	utr5
NM_001002050	181	209	utr5
NM_001002050	221	249	utr5
NM_001002050	221	249	cds
NM_001002050	271	301	cds
NM_001002050	302	331	cds
NM_001002050	401	431	cds
NM_001002050	441	469	cds
NM_001002050	511	539	cds
NM_001002050	541	571	cds
NM_001002050	572	601	cds
NM_001002050	621	651	cds
NM_001002050	652	681	cds
NM_001002050	701	729	cds
NM_001002050	741	771	cds
NM_001002050	791	821	cds
NM_001002050	822	851	cds
NM_001002050	881	911	cds
NM_001002050	912	941	cds
NM_001002050	1021	1051	utr3
NM_001002050	1052	1081	utr3
NM_001002053	31	61	utr5
NM_001002053	62	91	utr5
NM_001002053	151	181	cds
NM_001002053	271	301	cds
NM_001002053	302	331	cds
NM_001002053	332	361	cds
NM_001002053	362	391	cds
NM_001002053	392	421	cds
NM_001002053	422	451	cds
NM_001002053	481	509	cds
NM_001002053	541	571	cds
NM_001002053	651	679	utr3
NM_001002053	651	679	cds
NM_001002053	691	719	utr3
NM_001002053	721	749	utr3
NM_001002053	751	779	utr3
NM_001002053	901	931	utr3
NM_001002053	932	961	utr3
NM_001002055	151	179	cds
NM_001002055	181	211	cds
NM_001002055	212	241	cds
NM_001002055	321	349	cds
NM_001002055	421	449	cds
NM_001002055	481	509	cds
NM_001002055	611	639	cds
NM_001002055	641	671	cds
NM_001002055	851	881	cds
NM_001002055	882	911	cds
NM_001002055	961	989	cds
NM_001002055	1031	1059	cds
NM_001002055	1081	1111	cds
NM_001002055	1171	1201	cds
NM_001002055	1202	1231	cds
NM_001002055	1361	1391	utr3
NM_001002055	1361	1391	cds
NM_001002055	1392	1421	utr3
NM_001002055	1411	1441	utr3
NM_001002055	1501	1529	utr3
NM_001002055	1561	1589	utr3
NM_001002056	31	61	utr5
NM_001002056	62	91	utr5
NM_001002056	62	91	cds
NM_001002056	131	159	cds
NM_001002056	231	259	cds
NM_001002056	271	299	cds
NM_001002056	321	349	cds
NM_001002056	571	599	cds
NM_001002056	711	739	cds
NM_001002056	741	771	cds
NM_001002056	811	841	cds
NM_001002056	842	871	cds
NM_001002056	872	901	cds
NM_001002056	971	999	cds
NM_001002056	1081	1111	cds
NM_001002056	1171	1199	cds
NM_001002056	1211	1241	cds
NM_001002056	1242	1271	cds
NM_001002057	31	59	utr5
NM_001002057	101	131	cds
NM_001002057	132	161	cds
NM_001002057	181	211	cds
NM_001002057	231	259	cds
NM_001002057	261	291	cds
NM_001002057	301	329	cds
NM_001002057	511	539	cds
NM_001002057	591	619	cds
NM_001002057	751	779	cds
NM_001002057	881	909	cds
NM_001002057	931	961	cds
NM_001002058	11	41	utr5
NM_001002058	42	71	utr5
NM_001002058	72	101	utr5
NM_001002058	91	121	utr5
NM_001002058	122	151	utr5
NM_001002058	161	189	utr5
NM_001002058	161	189	cds
NM_001002058	201	229	cds
NM_001002058	231	261	cds
NM_001002058	262	291	cds
NM_001002058	291	319	cds
NM_001002058	371	399	cds
NM_001002058	421	449	cds
NM_001002058	461	489	cds
NM_001002058	491	519	cds
NM_001002058	661	689	cds
NM_001002058	791	819	cds
NM_001002058	861	889	cds
NM_001002058	911	939	cds
NM_001002058	961	991	cds
NM_001002058	1071	1099	cds
NM_001002058	1121	1149	cds
NM_001002058	1231	1259	utr3
NM_001002058	1301	1329	utr3
NM_001002058	1331	1359	utr3
NM_001002058	1391	1421	utr3
NM_001002058	1422	1451	utr3
NM_001002063	41	71	utr5
NM_001002063	72	101	utr5
NM_001002063	91	119	utr5
NM_001002063	121	151	utr5
NM_001002063	152	181	utr5
NM_001002063	182	211	utr5
NM_001002063	182	211	cds
NM_001002063	251	281	cds
NM_001002063	411	441	cds
NM_001002063	442	471	cds
NM_001002063	541	569	cds
NM_001002063	591	621	cds
NM_001002063	622	651	cds
NM_001002063	652	681	cds
NM_001002063	682	711	cds
NM_001002063	751	781	cds
NM_001002063	782	811	cds
NM_001002063	911	939	cds
NM_001002063	951	979	cds
NM_001002063	1141	1169	cds
NM_001002063	1441	1469	cds
NM_001002063	1521	1549	cds
NM_001002063	1641	1669	cds
NM_001002063	1781	1809	cds
NM_001002063	1811	1841	cds
NM_001002063	1961	1989	cds
NM_001002064	221	251	cds
NM_001002064	252	281	cds
NM_001002064	282	311	cds
NM_001002064	312	341	cds
NM_001002064	331	361	cds
NM_001002064	362	391	cds
NM_001002064	392	421	cds
NM_001002064	422	451	cds
NM_001002064	441	471	cds
NM_001002064	472	501	cds
NM_001002064	502	531	cds
NM_001002064	532	561	cds
NM_001002064	562	591	cds
NM_001002064	592	621	cds
NM_001002064	622	651	cds
NM_001002064	641	671	cds
NM_001002064	672	701	cds
NM_001002064	721	751	cds
NM_001002064	752	781	cds
NM_001002064	791	821	cds
NM_001002064	822	851	cds
NM_001002064	852	881	cds
NM_001002064	941	971	cds
NM_001002064	972	1001	cds
NM_001002064	1002	1031	cds
NM_001002064	1032	1061	cds
NM_001002064	1062	1091	cds
NM_001002064	1101	1131	cds
NM_001002064	1132	1161	cds
NM_001002064	1191	1219	cds
NM_001002064	1251	1281	cds
NM_001002064	1282	1311	cds
NM_001002064	1311	1341	cds
NM_001002064	1342	1371	cds
NM_001002064	1372	1401	utr3
NM_001002064	1372	1401	cds
NM_001002064	1402	1431	utr3
NM_001002064	1441	1471	utr3
NM_001002064	1472	1501	utr3
NM_001002064	1502	1531	utr3
NM_001002065	101	131	cds
NM_001002065	132	161	cds
NM_001002065	681	709	cds
NM_001002065	741	769	cds
NM_001002065	881	911	cds
NM_001002065	912	941	cds
NM_001002065	1031	1059	cds
NM_001002065	1141	1169	cds
NM_001002065	1231	1259	utr3
NM_001002065	1311	1339	utr3
NM_001002065	1531	1561	utr3
NM_001002067	11	41	utr5
NM_001002067	42	71	utr5
NM_001002067	72	101	utr5
NM_001002067	102	131	utr5
NM_001002067	132	161	utr5
NM_001002067	132	161	cds
NM_001002067	171	201	cds
NM_001002067	202	231	cds
NM_001002067	251	279	cds
NM_001002067	281	311	cds
NM_001002067	312	341	cds
NM_001002067	461	489	cds
NM_001002067	521	551	utr3
NM_001002067	521	551	cds
NM_001002067	552	581	utr3
NM_001002067	661	691	utr3
NM_001002067	692	721	utr3
NM_001002068	1	31	utr5
NM_001002068	32	61	utr5
NM_001002068	91	121	cds
NM_001002068	122	151	cds
NM_001002068	261	289	cds
NM_001002068	341	369	cds
NM_001002068	451	481	utr3
NM_001002068	491	521	utr3
NM_001002068	522	551	utr3
NM_001002068	621	651	utr3
NM_001002068	652	681	utr3
NM_001002068	691	719	utr3
NM_001002069	1	29	utr5
NM_001002069	1	29	cds
NM_001002069	71	99	cds
NM_001002069	131	159	cds
NM_001002069	261	291	cds
NM_001002069	292	321	cds
NM_001002070	11	41	utr5
NM_001002070	42	71	utr5
NM_001002070	42	71	cds
NM_001002070	151	179	cds
NM_001002070	291	321	cds
NM_001002070	322	351	cds
NM_001002070	451	479	cds
NM_001002070	481	511	cds
NM_001002070	641	669	cds
NM_001002070	701	731	cds
NM_001002070	781	811	cds
NM_001002070	812	841	cds
NM_001002070	921	951	cds
NM_001002070	952	981	cds
NM_001002070	1011	1039	cds
NM_001002070	1111	1139	cds
NM_001002070	1191	1219	cds
NM_001002072	21	51	utr5
NM_001002072	21	51	cds
NM_001002072	52	81	cds
NM_001002072	121	151	cds
NM_001002072	152	181	cds
NM_001002072	201	231	cds
NM_001002072	232	261	cds
NM_001002072	301	329	cds
NM_001002072	341	369	cds
NM_001002072	371	401	cds
NM_001002072	402	431	cds
NM_001002072	471	501	cds
NM_001002072	502	531	utr3
NM_001002072	502	531	cds
NM_001002072	541	569	utr3
NM_001002072	571	601	utr3
NM_001002072	621	651	utr3
NM_001002072	652	681	utr3
NM_001002072	671	699	utr3
NM_001002072	891	919	utr3
NM_001002072	961	989	utr3
NM_001002072	991	1021	utr3
NM_001002072	1061	1091	utr3
NM_001002072	1092	1121	utr3
NM_001002073	31	61	utr5
NM_001002073	62	91	utr5
NM_001002073	151	181	cds
NM_001002073	261	291	cds
NM_001002073	292	321	cds
NM_001002073	322	351	cds
NM_001002073	491	521	utr3
NM_001002073	522	551	utr3
NM_001002073	551	581	utr3
NM_001002073	582	611	utr3
NM_001002073	612	641	utr3
NM_001002073	651	681	utr3
NM_001002073	682	711	utr3
NM_001002073	751	781	utr3
NM_001002073	782	811	utr3
NM_001002073	812	841	utr3
NM_001002073	842	871	utr3
NM_001002073	872	901	utr3
NM_001002073	901	931	utr3
NM_001002073	932	961	utr3
NM_001002073	1071	1099	utr3
NM_001002073	1141	1169	utr3
NM_001002077	31	59	utr5
NM_001002077	341	371	utr3
NM_001002077	341	371	cds
NM_001002077	372	401	utr3
NM_001002078	141	169	cds
NM_001002078	291	319	utr3
NM_001002079	1	31	utr5
NM_001002079	1	31	cds
NM_001002079	41	69	cds
NM_001002079	261	291	cds
NM_001002079	292	321	cds
NM_001002079	351	381	cds
NM_001002080	651	681	cds
NM_001002080	811	841	cds
NM_001002080	1091	1119	cds
NM_001002080	1321	1351	cds
NM_001002080	1352	1381	cds
NM_001002080	1391	1421	cds
NM_001002080	1422	1451	cds
NM_001002080	1461	1491	cds
NM_001002080	1531	1559	cds
NM_001002080	1561	1589	cds
NM_001002080	1621	1651	cds
NM_001002080	1711	1739	cds
NM_001002080	1861	1889	cds
NM_001002080	1911	1939	cds
NM_001002080	2151	2179	cds
NM_001002080	2231	2259	cds
NM_001002080	2361	2389	cds
NM_001002080	2401	2429	cds
NM_001002080	2441	2469	cds
NM_001002080	2481	2509	cds
NM_001002080	2531	2561	cds
NM_001002080	2562	2591	cds
NM_001002080	2592	2621	cds
NM_001002080	2622	2651	cds
NM_001002080	2652	2681	cds
NM_001002080	2682	2711	cds
NM_001002080	2721	2751	cds
NM_001002080	2752	2781	cds
NM_001002080	2781	2811	cds
NM_001002080	2812	2841	cds
NM_001002080	2842	2871	cds
NM_001002080	2871	2901	cds
NM_001002080	2902	2931	cds
NM_001002080	2981	3011	cds
NM_001002080	3012	3041	cds
NM_001002080	3101	3129	cds
NM_001002080	3151	3181	cds
NM_001002080	3182	3211	cds
NM_001002080	3271	3301	cds
NM_001002080	3302	3331	cds
NM_001002080	3332	3361	cds
NM_001002081	1	31	utr5
NM_001002081	81	111	cds
NM_001002081	112	141	cds
NM_001002081	142	171	cds
NM_001002081	221	249	cds
NM_001002081	261	289	cds
NM_001002081	371	401	cds
NM_001002081	402	431	cds
NM_001002081	441	471	utr3
NM_001002081	441	471	cds
NM_001002081	472	501	utr3
NM_001002081	502	531	utr3
NM_001002082	21	51	utr5
NM_001002082	91	119	cds
NM_001002082	131	159	cds
NM_001002082	261	289	cds
NM_001002082	311	339	cds
NM_001002082	571	599	utr3
NM_001002082	571	599	cds
NM_001002082	671	699	utr3
NM_001002082	711	741	utr3
NM_001002082	742	771	utr3
NM_001002082	772	801	utr3
NM_001002082	811	841	utr3
NM_001002082	842	871	utr3
NM_001002082	872	901	utr3
NM_001002086	61	89	utr5
NM_001002086	131	159	utr5
NM_001002086	131	159	cds
NM_001002086	161	189	cds
NM_001002086	271	301	cds
NM_001002086	302	331	cds
NM_001002086	332	361	cds
NM_001002086	361	391	cds
NM_001002086	392	421	cds
NM_001002086	422	451	cds
NM_001002086	452	481	cds
NM_001002086	511	541	cds
NM_001002086	542	571	cds
NM_001002086	701	729	cds
NM_001002086	761	791	cds
NM_001002086	792	821	utr3
NM_001002086	792	821	cds
NM_001002086	822	851	utr3
NM_001002086	861	891	utr3
NM_001002086	892	921	utr3
NM_001002086	922	951	utr3
NM_001002086	952	981	utr3
NM_001002086	982	1011	utr3
NM_001002086	1041	1071	utr3
NM_001002086	1072	1101	utr3
NM_001002086	1251	1279	utr3
NM_001002086	1301	1329	utr3
NM_001002089	171	201	utr5
NM_001002089	231	259	utr5
NM_001002089	281	309	utr5
NM_001002089	281	309	cds
NM_001002089	311	339	cds
NM_001002089	421	451	cds
NM_001002089	452	481	cds
NM_001002089	521	551	cds
NM_001002089	552	581	cds
NM_001002089	601	629	cds
NM_001002089	761	791	cds
NM_001002089	792	821	cds
NM_001002089	831	859	cds
NM_001002089	861	891	cds
NM_001002089	892	921	cds
NM_001002089	941	969	cds
NM_001002089	1031	1059	cds
NM_001002089	1081	1111	cds
NM_001002089	1112	1141	cds
NM_001002089	1161	1191	cds
NM_001002089	1192	1221	cds
NM_001002089	1241	1271	cds
NM_001002089	1272	1301	cds
NM_001002089	1391	1419	cds
NM_001002089	1471	1499	utr3
NM_001002089	1501	1529	utr3
NM_001002089	1561	1589	utr3
NM_001002089	1691	1721	utr3
NM_001002089	1722	1751	utr3
NM_001002089	1752	1781	utr3
NM_001002097	21	51	utr5
NM_001002097	21	51	cds
NM_001002097	52	81	cds
NM_001002097	261	291	utr3
NM_001002097	331	359	utr3
NM_001002097	441	471	utr3
NM_001002097	472	501	utr3
NM_001002097	501	529	utr3
NM_001002097	551	579	utr3
NM_001002097	661	691	utr3
NM_001002097	731	761	utr3
NM_001002097	771	799	utr3
NM_001002097	851	879	utr3
NM_001002099	11	41	utr5
NM_001002099	42	71	utr5
NM_001002099	91	121	utr5
NM_001002099	91	121	cds
NM_001002099	122	151	cds
NM_001002099	151	179	cds
NM_001002099	281	309	cds
NM_001002099	331	359	cds
NM_001002099	501	529	cds
NM_001002099	531	559	cds
NM_001002099	631	661	cds
NM_001002099	711	739	cds
NM_001002099	791	821	cds
NM_001002099	861	889	cds
NM_001002099	891	921	cds
NM_001002099	922	951	cds
NM_001002099	981	1011	cds
NM_001002099	1041	1071	utr3
NM_001002099	1041	1071	cds
NM_001002099	1072	1101	utr3
NM_001002099	1321	1349	utr3
NM_001002099	1361	1391	utr3
NM_001002099	1392	1421	utr3
NM_001002099	1422	1451	utr3
NM_001002099	1451	1481	utr3
NM_001002099	1482	1511	utr3
NM_001002099	1551	1581	utr3
NM_001002104	81	111	cds
NM_001002104	241	269	cds
NM_001002104	301	329	cds
NM_001002104	341	371	cds
NM_001002104	372	401	cds
NM_001002104	391	419	cds
NM_001002104	441	471	cds
NM_001002104	472	501	cds
NM_001002104	521	551	cds
NM_001002104	552	581	cds
NM_001002104	601	631	cds
NM_001002104	632	661	cds
NM_001002104	821	849	cds
NM_001002104	911	939	cds
NM_001002104	981	1011	utr3
NM_001002104	1012	1041	utr3
NM_001002104	1051	1081	utr3
NM_001002104	1231	1259	utr3
NM_001002104	1301	1329	utr3
NM_001002104	1531	1559	utr3
NM_001002105	1521	1549	cds
NM_001002106	1	29	utr5
NM_001002106	41	69	utr5
NM_001002106	111	139	cds
NM_001002106	161	189	cds
NM_001002106	221	249	cds
NM_001002106	251	281	cds
NM_001002106	282	311	cds
NM_001002106	351	381	cds
NM_001002106	382	411	cds
NM_001002106	412	441	cds
NM_001002106	511	539	cds
NM_001002106	541	569	cds
NM_001002106	571	599	cds
NM_001002106	601	631	cds
NM_001002106	632	661	cds
NM_001002106	721	749	cds
NM_001002106	811	841	cds
NM_001002106	842	871	cds
NM_001002106	872	901	cds
NM_001002106	941	969	cds
NM_001002108	21	49	utr5
NM_001002108	231	261	cds
NM_001002108	262	291	cds
NM_001002108	471	499	cds
NM_001002108	531	561	cds
NM_001002108	571	599	cds
NM_001002108	611	639	cds
NM_001002108	641	671	cds
NM_001002108	691	721	cds
NM_001002111	751	779	utr3
NM_001002113	81	111	cds
NM_001002113	131	159	cds
NM_001002113	331	359	cds
NM_001002113	411	441	cds
NM_001002113	451	479	cds
NM_001002113	531	559	cds
NM_001002113	571	599	cds
NM_001002113	601	631	cds
NM_001002113	632	661	cds
NM_001002113	741	769	cds
NM_001002113	841	869	cds
NM_001002113	891	921	cds
NM_001002113	941	971	cds
NM_001002113	972	1001	cds
NM_001002113	1051	1079	utr3
NM_001002113	1191	1221	utr3
NM_001002113	1231	1259	utr3
NM_001002113	1281	1309	utr3
NM_001002113	1331	1361	utr3
NM_001002113	1362	1391	utr3
NM_001002113	1391	1419	utr3
NM_001002113	1451	1481	utr3
NM_001002113	1641	1671	utr3
NM_001002113	1821	1849	utr3
NM_001002113	1961	1989	utr3
NM_001002115	71	101	cds
NM_001002115	102	131	cds
NM_001002115	132	161	cds
NM_001002115	251	279	cds
NM_001002115	361	389	cds
NM_001002115	431	461	cds
NM_001002115	462	491	cds
NM_001002115	492	521	cds
NM_001002115	522	551	cds
NM_001002115	591	619	cds
NM_001002115	631	659	cds
NM_001002115	801	829	cds
NM_001002115	891	919	utr3
NM_001002115	961	991	utr3
NM_001002115	992	1021	utr3
NM_001002115	1071	1101	utr3
NM_001002115	1102	1131	utr3
NM_001002115	1151	1181	utr3
NM_001002115	1182	1211	utr3
NM_001002115	1221	1249	utr3
NM_001002115	1321	1351	utr3
NM_001002115	1352	1381	utr3
NM_001002116	661	691	cds
NM_001002116	741	771	cds
NM_001002116	772	801	cds
NM_001002116	811	841	cds
NM_001002116	842	871	cds
NM_001002116	1001	1031	cds
NM_001002116	1032	1061	cds
NM_001002116	1141	1169	cds
NM_001002116	1171	1199	utr3
NM_001002116	1171	1199	cds
NM_001002116	1271	1301	utr3
NM_001002116	1302	1331	utr3
NM_001002116	1331	1359	utr3
NM_001002116	1391	1419	utr3
NM_001002116	1591	1619	utr3
NM_001002116	1651	1679	utr3
NM_001002118	491	519	cds
NM_001002118	541	569	cds
NM_001002118	581	611	cds
NM_001002118	641	671	cds
NM_001002118	721	749	utr3
NM_001002118	831	859	utr3
NM_001002119	441	471	cds
NM_001002119	472	501	cds
NM_001002119	761	789	cds
NM_001002120	41	69	utr5
NM_001002120	241	269	cds
NM_001002120	431	459	cds
NM_001002120	501	529	cds
NM_001002120	531	559	cds
NM_001002120	561	589	cds
NM_001002120	591	621	cds
NM_001002120	622	651	cds
NM_001002120	652	681	cds
NM_001002120	682	711	cds
NM_001002120	811	841	cds
NM_001002120	931	961	cds
NM_001002120	991	1019	cds
NM_001002120	1081	1109	cds
NM_001002120	1111	1139	cds
NM_001002120	1161	1189	cds
NM_001002120	1191	1221	cds
NM_001002120	1222	1251	cds
NM_001002120	1331	1359	cds
NM_001002120	1361	1389	cds
NM_001002120	1461	1489	cds
NM_001002120	1601	1629	cds
NM_001002120	1651	1681	cds
NM_001002120	1751	1779	cds
NM_001002120	1781	1811	cds
NM_001002120	1812	1841	cds
NM_001002120	1851	1879	cds
NM_001002120	1971	1999	utr3
NM_001002121	21	51	utr5
NM_001002121	52	81	utr5
NM_001002121	171	201	cds
NM_001002121	202	231	cds
NM_001002121	281	311	cds
NM_001002121	312	341	cds
NM_001002121	351	381	cds
NM_001002121	391	419	cds
NM_001002121	471	499	cds
NM_001002121	581	611	cds
NM_001002121	612	641	cds
NM_001002121	642	671	cds
NM_001002121	791	819	cds
NM_001002121	871	901	cds
NM_001002121	902	931	cds
NM_001002121	931	961	cds
NM_001002121	962	991	cds
NM_001002121	1081	1111	cds
NM_001002121	1112	1141	cds
NM_001002121	1201	1231	cds
NM_001002121	1232	1261	cds
NM_001002121	1262	1291	cds
NM_001002121	1292	1321	cds
NM_001002121	1341	1369	cds
NM_001002121	1471	1499	cds
NM_001002121	1501	1529	cds
NM_001002121	1551	1579	cds
NM_001002121	1631	1659	utr3
NM_001002121	1661	1691	utr3
NM_001002121	1692	1721	utr3
NM_001002121	1711	1739	utr3
NM_001002121	1771	1801	utr3
NM_001002121	1802	1831	utr3
NM_001002121	1832	1861	utr3
NM_001002121	1931	1959	utr3
NM_001002121	1961	1991	utr3
NM_001002121	1992	2021	utr3
NM_001002123	111	139	cds
NM_001002123	151	179	cds
NM_001002123	271	299	cds
NM_001002123	321	349	cds
NM_001002123	451	479	cds
NM_001002123	521	549	cds
NM_001002123	551	579	cds
NM_001002123	581	611	cds
NM_001002123	651	679	cds
NM_001002127	41	71	utr5
NM_001002127	72	101	utr5
NM_001002127	101	129	utr5
NM_001002127	191	219	cds
NM_001002127	251	279	cds
NM_001002127	341	369	cds
NM_001002127	391	419	cds
NM_001002127	511	541	cds
NM_001002127	542	571	cds
NM_001002127	611	641	cds
NM_001002127	651	679	cds
NM_001002127	681	711	cds
NM_001002127	712	741	cds
NM_001002127	741	771	cds
NM_001002127	841	869	cds
NM_001002127	911	941	cds
NM_001002127	942	971	utr3
NM_001002127	942	971	cds
NM_001002127	1031	1059	utr3
NM_001002127	1091	1121	utr3
NM_001002127	1122	1151	utr3
NM_001002128	41	71	utr5
NM_001002128	41	71	cds
NM_001002128	72	101	cds
NM_001002128	121	149	cds
NM_001002128	161	189	cds
NM_001002128	191	221	cds
NM_001002128	222	251	cds
NM_001002128	301	329	cds
NM_001002128	341	369	cds
NM_001002128	371	401	cds
NM_001002128	402	431	cds
NM_001002128	501	529	cds
NM_001002128	601	631	cds
NM_001002128	632	661	cds
NM_001002128	731	761	cds
NM_001002128	781	809	cds
NM_001002128	831	859	cds
NM_001002128	881	911	cds
NM_001002128	921	949	cds
NM_001002128	991	1021	cds
NM_001002128	1022	1051	cds
NM_001002128	1051	1079	cds
NM_001002128	1081	1111	cds
NM_001002128	1112	1141	cds
NM_001002128	1221	1249	cds
NM_001002128	1261	1291	cds
NM_001002128	1292	1321	cds
NM_001002128	1322	1351	utr3
NM_001002128	1322	1351	cds
NM_001002128	1451	1481	utr3
NM_001002128	1482	1511	utr3
NM_001002128	1511	1541	utr3
NM_001002128	1611	1639	utr3
NM_001002130	641	671	cds
NM_001002130	731	759	cds
NM_001002130	761	789	utr3
NM_001002130	761	789	cds
NM_001002130	791	821	utr3
NM_001002130	822	851	utr3
NM_001002130	951	981	utr3
NM_001002130	982	1011	utr3
NM_001002130	1021	1049	utr3
NM_001002130	1181	1209	utr3
NM_001002130	1231	1261	utr3
NM_001002130	1311	1339	utr3
NM_001002130	1361	1391	utr3
NM_001002130	1392	1421	utr3
NM_001002130	1431	1459	utr3
NM_001002130	1511	1541	utr3
NM_001002130	1641	1669	utr3
NM_001002130	1741	1769	utr3
NM_001002131	41	71	utr5
NM_001002131	41	71	cds
NM_001002131	121	149	cds
NM_001002131	221	249	cds
NM_001002131	251	279	cds
NM_001002131	411	441	cds
NM_001002131	442	471	cds
NM_001002131	531	559	cds
NM_001002131	631	659	cds
NM_001002131	671	701	cds
NM_001002131	711	741	cds
NM_001002131	742	771	cds
NM_001002131	781	809	cds
NM_001002131	921	951	utr3
NM_001002131	991	1021	utr3
NM_001002131	1022	1051	utr3
NM_001002131	1101	1129	utr3
NM_001002131	1181	1209	utr3
NM_001002131	1231	1259	utr3
NM_001002137	101	131	utr5
NM_001002137	101	131	cds
NM_001002137	211	239	cds
NM_001002137	401	431	cds
NM_001002137	741	769	utr3
NM_001002139	31	61	cds
NM_001002139	62	91	cds
NM_001002139	121	149	cds
NM_001002139	181	209	cds
NM_001002139	211	239	cds
NM_001002139	271	299	cds
NM_001002139	361	389	cds
NM_001002139	501	531	cds
NM_001002144	91	121	cds
NM_001002144	122	151	cds
NM_001002144	151	179	cds
NM_001002144	251	279	cds
NM_001002144	361	389	cds
NM_001002145	291	319	cds
NM_001002145	651	679	cds
NM_001002145	721	751	cds
NM_001002145	752	781	cds
NM_001002145	901	929	cds
NM_001002145	991	1019	cds
NM_001002145	1071	1099	cds
NM_001002145	1121	1149	cds
NM_001002145	1191	1219	cds
NM_001002145	1311	1339	utr3
NM_001002145	1481	1509	utr3
NM_001002145	1591	1621	utr3
NM_001002145	1701	1731	utr3
NM_001002147	261	291	cds
NM_001002147	371	399	utr3
NM_001002147	371	399	cds
NM_001002147	441	469	utr3
NM_001002147	591	619	utr3
NM_001002147	621	649	utr3
NM_001002147	731	759	utr3
NM_001002147	761	791	utr3
NM_001002147	792	821	utr3
NM_001002147	821	849	utr3
NM_001002147	851	881	utr3
NM_001002147	882	911	utr3
NM_001002151	1011	1039	cds
NM_001002151	1561	1589	utr3
NM_001002151	1741	1769	utr3
NM_001002151	1831	1859	utr3
NM_001002151	1871	1899	utr3
NM_001002151	1951	1981	utr3
NM_001002151	1982	2011	utr3
NM_001002152	131	161	cds
NM_001002152	162	191	cds
NM_001002152	231	259	cds
NM_001002152	261	291	cds
NM_001002152	292	321	cds
NM_001002152	341	369	cds
NM_001002152	381	411	cds
NM_001002152	412	441	cds
NM_001002152	481	509	cds
NM_001002152	511	539	cds
NM_001002152	541	571	cds
NM_001002152	572	601	cds
NM_001002152	601	631	cds
NM_001002152	641	671	utr3
NM_001002152	641	671	cds
NM_001002152	672	701	utr3
NM_001002152	702	731	utr3
NM_001002152	821	849	utr3
NM_001002152	1021	1049	utr3
NM_001002152	1101	1131	utr3
NM_001002152	1132	1161	utr3
NM_001002152	1162	1191	utr3
NM_001002152	1191	1221	utr3
NM_001002152	1231	1261	utr3
NM_001002152	1271	1299	utr3
NM_001002152	1341	1371	utr3
NM_001002152	1372	1401	utr3
NM_001002152	1402	1431	utr3
NM_001002152	1421	1449	utr3
NM_001002152	1451	1481	utr3
NM_001002152	1621	1649	utr3
NM_001002152	1671	1701	utr3
NM_001002152	1702	1731	utr3
NM_001002155	1	31	utr5
NM_001002155	71	101	cds
NM_001002155	102	131	cds
NM_001002155	131	159	cds
NM_001002155	171	201	cds
NM_001002155	202	231	cds
NM_001002155	241	269	cds
NM_001002155	341	369	cds
NM_001002155	391	419	cds
NM_001002155	421	451	cds
NM_001002155	481	511	cds
NM_001002157	291	319	cds
NM_001002157	421	451	cds
NM_001002157	452	481	cds
NM_001002157	471	499	cds
NM_001002157	501	529	cds
NM_001002157	621	649	cds
NM_001002157	701	729	cds
NM_001002157	751	781	cds
NM_001002157	841	871	cds
NM_001002157	872	901	cds
NM_001002157	941	969	cds
NM_001002157	1141	1171	utr3
NM_001002157	1141	1171	cds
NM_001002157	1172	1201	utr3
NM_001002157	1241	1269	utr3
NM_001002157	1321	1351	utr3
NM_001002157	1352	1381	utr3
NM_001002160	21	51	utr5
NM_001002160	52	81	utr5
NM_001002160	52	81	cds
NM_001002160	131	161	cds
NM_001002160	162	191	cds
NM_001002160	192	221	cds
NM_001002160	291	319	cds
NM_001002160	321	349	cds
NM_001002160	451	479	cds
NM_001002160	501	529	cds
NM_001002160	631	659	cds
NM_001002160	741	769	cds
NM_001002160	781	809	cds
NM_001002160	811	841	cds
NM_001002160	842	871	cds
NM_001002160	872	901	cds
NM_001002160	991	1019	cds
NM_001002160	1041	1071	cds
NM_001002160	1141	1169	utr3
NM_001002160	1201	1229	utr3
NM_001002160	1241	1269	utr3
NM_001002160	1311	1341	utr3
NM_001002160	1361	1389	utr3
NM_001002160	1421	1449	utr3
NM_001002161	91	121	utr5
NM_001002161	122	151	utr5
NM_001002161	152	181	utr5
NM_001002161	182	211	utr5
NM_001002161	231	259	utr5
NM_001002161	391	419	cds
NM_001002161	441	471	cds
NM_001002161	481	509	cds
NM_001002161	531	561	cds
NM_001002161	562	591	cds
NM_001002161	731	759	cds
NM_001002161	811	841	cds
NM_001002161	842	871	cds
NM_001002161	881	911	cds
NM_001002161	912	941	cds
NM_001002161	942	971	cds
NM_001002161	972	1001	cds
NM_001002161	1011	1039	cds
NM_001002161	1131	1159	cds
NM_001002161	1211	1241	cds
NM_001002161	1242	1271	cds
NM_001002161	1281	1309	cds
NM_001002161	1341	1371	cds
NM_001002161	1372	1401	cds
NM_001002161	1441	1469	cds
NM_001002161	1501	1529	cds
NM_001002161	1571	1599	cds
NM_001002161	1661	1691	cds
NM_001002161	1781	1809	utr3
NM_001002161	1811	1839	utr3
NM_001002161	1861	1891	utr3
NM_001002162	11	39	utr5
NM_001002162	61	89	utr5
NM_001002162	131	159	cds
NM_001002162	281	311	cds
NM_001002162	312	341	cds
NM_001002162	411	439	cds
NM_001002162	481	511	cds
NM_001002162	512	541	cds
NM_001002162	542	571	cds
NM_001002162	661	691	cds
NM_001002162	692	721	cds
NM_001002162	741	769	cds
NM_001002162	911	939	utr3
NM_001002162	981	1009	utr3
NM_001002162	1031	1059	utr3
NM_001002162	1061	1089	utr3
NM_001002162	1091	1119	utr3
NM_001002162	1161	1189	utr3
NM_001002162	1211	1239	utr3
NM_001002162	1401	1431	utr3
NM_001002162	1441	1471	utr3
NM_001002162	1472	1501	utr3
NM_001002162	1501	1529	utr3
NM_001002162	1531	1559	utr3
NM_001002162	1741	1771	utr3
NM_001002162	1772	1801	utr3
NM_001002162	1871	1901	utr3
NM_001002162	1902	1931	utr3
NM_001002163	181	211	cds
NM_001002163	212	241	cds
NM_001002163	242	271	cds
NM_001002163	272	301	cds
NM_001002163	351	379	cds
NM_001002164	1	29	utr5
NM_001002164	131	161	utr5
NM_001002164	131	161	cds
NM_001002164	162	191	cds
NM_001002164	251	279	cds
NM_001002164	281	311	cds
NM_001002164	341	371	cds
NM_001002164	372	401	cds
NM_001002164	441	469	cds
NM_001002164	591	621	cds
NM_001002164	641	669	cds
NM_001002164	711	741	cds
NM_001002164	742	771	cds
NM_001002164	1011	1039	cds
NM_001002164	1061	1091	cds
NM_001002164	1092	1121	cds
NM_001002164	1131	1159	cds
NM_001002164	1261	1289	cds
NM_001002164	1291	1321	cds
NM_001002164	1322	1351	utr3
NM_001002164	1322	1351	cds
NM_001002164	1352	1381	utr3
NM_001002164	1411	1441	utr3
NM_001002164	1442	1471	utr3
NM_001002164	1491	1519	utr3
NM_001002164	1561	1589	utr3
NM_001002165	1761	1791	utr3
NM_001002165	1792	1821	utr3
NM_001002165	1901	1929	utr3
NM_001002165	1951	1981	utr3
NM_001002165	1991	2019	utr3
NM_001002165	2121	2151	utr3
NM_001002165	2152	2181	utr3
NM_001002165	2181	2209	utr3
NM_001002165	2261	2291	utr3
NM_001002165	2292	2321	utr3
NM_001002165	2401	2429	utr3
NM_001002165	2481	2509	utr3
NM_001002165	2641	2671	utr3
NM_001002165	2672	2701	utr3
NM_001002165	2741	2771	utr3
NM_001002165	2841	2871	utr3
NM_001002165	2881	2909	utr3
NM_001002165	2921	2949	utr3
NM_001002165	2961	2991	utr3
NM_001002165	2992	3021	utr3
NM_001002172	41	71	utr5
NM_001002172	72	101	utr5
NM_001002172	281	309	cds
NM_001002172	331	359	cds
NM_001002172	531	561	cds
NM_001002172	562	591	cds
NM_001002172	611	639	cds
NM_001002172	661	689	cds
NM_001002172	731	759	cds
NM_001002172	761	791	cds
NM_001002172	811	841	cds
NM_001002172	842	871	cds
NM_001002172	872	901	cds
NM_001002172	961	989	cds
NM_001002172	1001	1031	cds
NM_001002172	1051	1079	cds
NM_001002172	1081	1111	cds
NM_001002172	1112	1141	cds
NM_001002172	1151	1179	cds
NM_001002172	1181	1211	cds
NM_001002172	1271	1301	utr3
NM_001002172	1271	1301	cds
NM_001002172	1302	1331	utr3
NM_001002172	1341	1371	utr3
NM_001002172	1372	1401	utr3
NM_001002172	1401	1429	utr3
NM_001002172	1451	1481	utr3
NM_001002172	1482	1511	utr3
NM_001002172	1512	1541	utr3
NM_001002172	1571	1599	utr3
NM_001002172	1661	1691	utr3
NM_001002172	1692	1721	utr3
NM_001002173	1171	1199	cds
NM_001002173	1421	1449	cds
NM_001002173	1761	1789	cds
NM_001002173	1791	1819	utr3
NM_001002173	1791	1819	cds
NM_001002173	1821	1849	utr3
NM_001002173	1991	2019	utr3
NM_001002173	2191	2219	utr3
NM_001002173	2381	2409	utr3
NM_001002173	2421	2449	utr3
NM_001002173	2461	2489	utr3
NM_001002173	2631	2659	utr3
NM_001002173	2681	2709	utr3
NM_001002179	21	49	utr5
NM_001002179	51	79	utr5
NM_001002179	91	121	utr5
NM_001002179	91	121	cds
NM_001002179	122	151	cds
NM_001002179	151	181	cds
NM_001002179	191	219	cds
NM_001002179	301	329	cds
NM_001002179	331	361	cds
NM_001002179	431	459	cds
NM_001002179	461	489	cds
NM_001002179	511	541	cds
NM_001002179	542	571	cds
NM_001002179	572	601	cds
NM_001002179	651	681	cds
NM_001002179	682	711	cds
NM_001002179	701	731	cds
NM_001002179	732	761	cds
NM_001002179	762	791	cds
NM_001002179	792	821	cds
NM_001002179	821	849	cds
NM_001002179	871	901	cds
NM_001002179	902	931	cds
NM_001002179	971	999	cds
NM_001002179	1051	1079	cds
NM_001002179	1091	1121	cds
NM_001002179	1122	1151	utr3
NM_001002179	1161	1191	utr3
NM_001002179	1192	1221	utr3
NM_001002179	1281	1309	utr3
NM_001002179	1321	1351	utr3
NM_001002179	1352	1381	utr3
NM_001002179	1451	1481	utr3
NM_001002179	1482	1511	utr3
NM_001002179	1512	1541	utr3
NM_001002179	1591	1621	utr3
NM_001002179	1622	1651	utr3
NM_001002179	1661	1689	utr3
NM_001002179	1691	1721	utr3
NM_001002179	1831	1859	utr3
NM_001002179	1941	1971	utr3
NM_001002179	1972	2001	utr3
NM_001002179	2021	2049	utr3
NM_001002179	2071	2099	utr3
NM_001002179	2231	2259	utr3
NM_001002180	1881	1909	utr3
NM_001002180	1951	1979	utr3
NM_001002180	2061	2089	utr3
NM_001002180	2091	2119	utr3
NM_001002180	2181	2209	utr3
NM_001002180	2321	2349	utr3
NM_001002180	2351	2381	utr3
NM_001002180	2382	2411	utr3
NM_001002180	2451	2479	utr3
NM_001002180	2651	2681	utr3
NM_001002180	2682	2711	utr3
NM_001002180	2711	2739	utr3
NM_001002180	2741	2769	utr3
NM_001002180	2941	2971	utr3
NM_001002180	2972	3001	utr3
NM_001002180	3001	3031	utr3
NM_001002180	3032	3061	utr3
NM_001002180	3111	3139	utr3
NM_001002194	111	141	cds
NM_001002194	541	571	cds
NM_001002194	591	621	cds
NM_001002194	631	659	cds
NM_001002194	681	711	cds
NM_001002194	712	741	cds
NM_001002194	891	919	cds
NM_001002194	1051	1079	cds
NM_001002194	1151	1179	utr3
NM_001002194	1151	1179	cds
NM_001002198	571	599	cds
NM_001002198	661	689	cds
NM_001002198	771	799	cds
NM_001002198	911	939	cds
NM_001002198	1111	1141	cds
NM_001002198	1142	1171	cds
NM_001002198	1231	1259	cds
NM_001002198	1271	1299	cds
NM_001002198	1381	1409	cds
NM_001002198	1441	1471	cds
NM_001002198	1472	1501	cds
NM_001002198	1551	1579	cds
NM_001002198	1641	1671	cds
NM_001002198	1672	1701	cds
NM_001002198	1691	1721	cds
NM_001002198	1751	1779	cds
NM_001002198	1781	1811	cds
NM_001002198	1812	1841	cds
NM_001002198	1831	1859	cds
NM_001002198	1861	1891	cds
NM_001002198	1911	1941	cds
NM_001002198	1991	2019	utr3
NM_001002198	2051	2079	utr3
NM_001002198	2151	2179	utr3
NM_001002199	91	119	cds
NM_001002199	201	229	cds
NM_001002199	241	269	cds
NM_001002199	471	499	cds
NM_001002199	531	559	utr3
NM_001002200	31	61	utr5
NM_001002200	141	169	cds
NM_001002200	191	219	cds
NM_001002200	251	279	cds
NM_001002200	361	391	cds
NM_001002200	501	531	cds
NM_001002200	532	561	cds
NM_001002200	601	631	cds
NM_001002200	632	661	cds
NM_001002200	751	779	cds
NM_001002200	851	881	cds
NM_001002200	882	911	cds
NM_001002200	941	971	cds
NM_001002200	1021	1051	cds
NM_001002200	1071	1099	cds
NM_001002200	1101	1131	cds
NM_001002200	1132	1161	cds
NM_001002200	1231	1259	utr3
NM_001002203	11	39	utr5
NM_001002203	11	39	cds
NM_001002203	41	71	cds
NM_001002203	72	101	cds
NM_001002203	91	119	cds
NM_001002203	161	191	cds
NM_001002203	221	249	cds
NM_001002203	251	281	cds
NM_001002203	282	311	cds
NM_001002203	391	419	utr3
NM_001002203	431	461	utr3
NM_001002203	571	601	utr3
NM_001002203	602	631	utr3
NM_001002203	621	649	utr3
NM_001002204	31	61	utr5
NM_001002204	181	209	cds
NM_001002204	241	271	cds
NM_001002204	341	371	cds
NM_001002204	372	401	cds
NM_001002204	531	561	cds
NM_001002204	591	619	cds
NM_001002204	651	679	cds
NM_001002204	741	769	cds
NM_001002204	1021	1049	cds
NM_001002204	1161	1189	utr3
NM_001002211	1	31	utr5
NM_001002211	101	131	utr5
NM_001002211	132	161	utr5
NM_001002211	211	239	utr5
NM_001002211	351	381	cds
NM_001002211	411	441	cds
NM_001002211	471	501	cds
NM_001002211	502	531	cds
NM_001002211	621	649	cds
NM_001002211	781	811	cds
NM_001002211	812	841	cds
NM_001002211	991	1021	cds
NM_001002211	1022	1051	cds
NM_001002211	1071	1099	utr3
NM_001002211	1101	1129	utr3
NM_001002211	1131	1159	utr3
NM_001002211	1241	1269	utr3
NM_001002211	1331	1359	utr3
NM_001002220	151	179	cds
NM_001002220	371	399	cds
NM_001002220	501	529	cds
NM_001002220	641	669	utr3
NM_001002220	891	919	utr3
NM_001002220	1021	1049	utr3
NM_001002221	71	101	cds
NM_001002221	161	189	cds
NM_001002221	261	291	cds
NM_001002221	292	321	cds
NM_001002221	491	521	cds
NM_001002221	531	559	cds
NM_001002221	701	731	cds
NM_001002221	781	809	cds
NM_001002221	831	861	cds
NM_001002221	862	891	cds
NM_001002221	931	959	cds
NM_001002221	1021	1049	cds
NM_001002221	1081	1109	cds
NM_001002221	1141	1169	cds
NM_001002221	1181	1211	utr3
NM_001002221	1181	1211	cds
NM_001002221	1271	1299	utr3
NM_001002222	4181	4209	utr3
NM_001002222	4481	4511	utr3
NM_001002222	4591	4619	utr3
NM_001002222	4661	4689	utr3
NM_001002222	4941	4969	utr3
NM_001002222	5031	5059	utr3
NM_001002222	5131	5161	utr3
NM_001002222	5162	5191	utr3
NM_001002222	5241	5271	utr3
NM_001002222	5272	5301	utr3
NM_001002222	5311	5341	utr3
NM_001002222	5342	5371	utr3
NM_001002222	5411	5441	utr3
NM_001002222	5451	5479	utr3
NM_001002222	5541	5571	utr3
NM_001002222	5572	5601	utr3
NM_001002222	5631	5659	utr3
NM_001002222	5691	5721	utr3
[truncated: 113,342 more rows]

## Sheet: 0.4hpf->1hpf
TransID	start(0-based)	end(0-based)	region
NM_001001399	51	81	utr5
NM_001001399	82	111	utr5
NM_001001399	82	111	cds
NM_001001399	112	141	cds
NM_001001399	142	171	cds
NM_001001399	181	209	cds
NM_001001399	211	241	cds
NM_001001399	271	301	cds
NM_001001399	302	331	cds
NM_001001399	341	371	cds
NM_001001399	372	401	cds
NM_001001399	471	499	cds
NM_001001399	571	601	cds
NM_001001399	602	631	cds
NM_001001399	632	661	utr3
NM_001001399	632	661	cds
NM_001001399	741	771	utr3
NM_001001399	801	831	utr3
NM_001001399	832	861	utr3
NM_001001399	891	921	utr3
NM_001001399	922	951	utr3
NM_001001399	952	981	utr3
NM_001001399	982	1011	utr3
NM_001001402	691	719	cds
NM_001001402	1041	1069	cds
NM_001001402	1811	1841	cds
NM_001001402	1842	1871	cds
NM_001001402	1872	1901	cds
NM_001001402	2141	2169	utr3
NM_001001402	2231	2259	utr3
NM_001001402	2281	2311	utr3
NM_001001402	2312	2341	utr3
NM_001001402	2342	2371	utr3
NM_001001402	2361	2389	utr3
NM_001001402	2411	2439	utr3
NM_001001402	2511	2541	utr3
NM_001001402	2542	2571	utr3
NM_001001402	2611	2641	utr3
NM_001001402	2651	2679	utr3
NM_001001402	2681	2711	utr3
NM_001001402	2712	2741	utr3
NM_001001402	2742	2771	utr3
NM_001001402	2771	2801	utr3
NM_001001402	2802	2831	utr3
NM_001001402	2871	2901	utr3
NM_001001402	2902	2931	utr3
NM_001001402	2961	2991	utr3
NM_001001402	2992	3021	utr3
NM_001001402	3041	3069	utr3
NM_001001402	3171	3201	utr3
NM_001001402	3202	3231	utr3
NM_001001402	3231	3259	utr3
NM_001001589	161	189	cds
NM_001001589	521	549	cds
NM_001001589	1071	1101	cds
NM_001001589	1211	1241	cds
NM_001001589	1242	1271	cds
NM_001001589	1271	1301	cds
NM_001001589	1321	1351	cds
NM_001001589	1352	1381	cds
NM_001001589	1391	1419	cds
NM_001001589	1461	1491	utr3
NM_001001589	1521	1551	utr3
NM_001001589	1561	1591	utr3
NM_001001589	1592	1621	utr3
NM_001001590	51	81	utr5
NM_001001590	82	111	cds
NM_001001590	151	181	cds
NM_001001590	201	229	cds
NM_001001590	241	269	cds
NM_001001590	281	309	cds
NM_001001590	331	359	cds
NM_001001590	361	389	cds
NM_001001590	421	449	cds
NM_001001590	461	491	cds
NM_001001590	492	521	cds
NM_001001590	522	551	cds
NM_001001590	552	581	cds
NM_001001590	582	611	cds
NM_001001590	612	641	cds
NM_001001590	661	691	cds
NM_001001590	692	721	cds
NM_001001590	722	751	cds
NM_001001590	761	789	cds
NM_001001590	861	891	cds
NM_001001590	892	921	cds
NM_001001590	922	951	cds
NM_001001590	952	981	cds
NM_001001590	991	1019	cds
NM_001001590	1021	1051	cds
NM_001001590	1052	1081	cds
NM_001001590	1082	1111	cds
NM_001001590	1112	1141	cds
NM_001001590	1142	1171	cds
NM_001001590	1171	1201	cds
NM_001001590	1231	1261	cds
NM_001001590	1281	1311	utr3
NM_001001590	1281	1311	cds
NM_001001590	1312	1341	utr3
NM_001001593	1	29	utr5
NM_001001593	1	29	cds
NM_001001593	31	61	cds
NM_001001593	62	91	cds
NM_001001593	161	189	cds
NM_001001593	221	251	cds
NM_001001593	252	281	cds
NM_001001593	282	311	cds
NM_001001593	312	341	cds
NM_001001593	341	371	cds
NM_001001593	381	409	cds
NM_001001593	451	481	cds
NM_001001593	482	511	utr3
NM_001001593	482	511	cds
NM_001001724	41	71	utr5
NM_001001724	72	101	utr5
NM_001001724	102	131	utr5
NM_001001724	221	249	cds
NM_001001724	391	421	cds
NM_001001724	422	451	cds
NM_001001724	511	541	cds
NM_001001724	542	571	utr3
NM_001001724	542	571	cds
NM_001001724	561	589	utr3
NM_001001724	561	589	cds
NM_001001724	661	689	utr3
NM_001001724	711	741	utr3
NM_001001724	742	771	utr3
NM_001001724	772	801	utr3
NM_001001724	811	839	utr3
NM_001001724	961	991	utr3
NM_001001724	992	1021	utr3
NM_001001724	1022	1051	utr3
NM_001001724	1051	1079	utr3
NM_001001724	1081	1111	utr3
NM_001001724	1112	1141	utr3
NM_001001724	1142	1171	utr3
NM_001001724	1172	1201	utr3
NM_001001729	131	159	utr5
NM_001001729	501	529	cds
NM_001001729	1181	1209	utr3
NM_001001729	1441	1469	utr3
NM_001001729	1521	1551	utr3
NM_001001729	1681	1709	utr3
NM_001001729	2381	2409	utr3
NM_001001729	2461	2489	utr3
NM_001001818	111	139	utr5
NM_001001818	401	429	utr5
NM_001001818	481	509	utr5
NM_001001818	521	551	utr5
NM_001001818	521	551	cds
NM_001001818	601	631	cds
NM_001001818	632	661	cds
NM_001001818	701	729	cds
NM_001001818	731	759	cds
NM_001001818	781	809	cds
NM_001001818	921	949	cds
NM_001001818	951	981	cds
NM_001001818	982	1011	cds
NM_001001818	1021	1051	cds
NM_001001818	1052	1081	cds
NM_001001818	1071	1101	cds
NM_001001818	1191	1219	cds
NM_001001818	1231	1261	cds
NM_001001818	1262	1291	cds
NM_001001818	1292	1321	cds
NM_001001818	1322	1351	cds
NM_001001818	1371	1401	cds
NM_001001818	1402	1431	cds
NM_001001818	1432	1461	cds
NM_001001818	1462	1491	cds
NM_001001818	1481	1511	cds
NM_001001818	1512	1541	cds
NM_001001818	1611	1639	utr3
NM_001001818	1691	1721	utr3
NM_001001818	1722	1751	utr3
NM_001001818	1752	1781	utr3
NM_001001818	1801	1831	utr3
NM_001001818	1832	1861	utr3
NM_001001818	1862	1891	utr3
NM_001001818	1911	1941	utr3
NM_001001818	1942	1971	utr3
NM_001001818	1971	1999	utr3
NM_001001818	2031	2059	utr3
NM_001001818	2061	2091	utr3
NM_001001818	2111	2139	utr3
NM_001001818	2201	2229	utr3
NM_001001818	2231	2259	utr3
NM_001001818	2281	2311	utr3
NM_001001818	2312	2341	utr3
NM_001001818	2342	2371	utr3
NM_001001818	2372	2401	utr3
NM_001001818	2402	2431	utr3
NM_001001818	2432	2461	utr3
NM_001001818	2462	2491	utr3
NM_001001818	2511	2539	utr3
NM_001001818	2541	2569	utr3
NM_001001819	1	31	utr5
NM_001001819	1	31	cds
NM_001001819	32	61	cds
NM_001001819	111	141	cds
NM_001001819	142	171	cds
NM_001001819	201	231	cds
NM_001001819	232	261	cds
NM_001001819	331	361	cds
NM_001001819	362	391	cds
NM_001001819	401	431	cds
NM_001001819	432	461	utr3
NM_001001819	432	461	cds
NM_001001822	31	61	utr5
NM_001001822	62	91	utr5
NM_001001822	81	109	utr5
NM_001001822	251	279	utr5
NM_001001822	281	309	utr5
NM_001001822	501	529	utr5
NM_001001822	571	599	utr5
NM_001001822	571	599	cds
NM_001001822	711	739	cds
NM_001001822	761	791	cds
NM_001001822	961	991	cds
NM_001001822	992	1021	cds
NM_001001822	1031	1059	cds
NM_001001822	1061	1091	cds
NM_001001822	1161	1191	cds
NM_001001822	1331	1359	cds
NM_001001822	1361	1389	cds
NM_001001822	1691	1721	cds
NM_001001822	1722	1751	cds
NM_001001822	1752	1781	cds
NM_001001822	1801	1831	utr3
NM_001001822	1832	1861	utr3
NM_001001822	1901	1931	utr3
NM_001001822	1932	1961	utr3
NM_001001822	1991	2019	utr3
NM_001001822	2181	2209	utr3
NM_001001822	2321	2351	utr3
NM_001001822	2371	2401	utr3
NM_001001822	2402	2431	utr3
NM_001001822	2432	2461	utr3
NM_001001822	2461	2491	utr3
NM_001001822	2492	2521	utr3
NM_001001823	211	239	cds
NM_001001823	671	699	cds
NM_001001823	771	799	cds
NM_001001823	1021	1051	cds
NM_001001823	1061	1089	cds
NM_001001823	1291	1319	cds
NM_001001823	1851	1879	cds
NM_001001823	1971	1999	cds
NM_001001823	2001	2029	cds
NM_001001823	2141	2169	cds
NM_001001823	2171	2199	cds
NM_001001823	2251	2279	cds
NM_001001823	2471	2501	utr3
NM_001001823	2502	2531	utr3
NM_001001823	2532	2561	utr3
NM_001001823	2561	2591	utr3
NM_001001823	2592	2621	utr3
NM_001001828	511	539	cds
NM_001001828	731	761	cds
NM_001001828	762	791	cds
NM_001001828	881	911	cds
NM_001001828	912	941	cds
NM_001001828	1001	1031	cds
NM_001001828	1032	1061	cds
NM_001001828	1062	1091	cds
NM_001001828	1151	1179	utr3
NM_001001828	1151	1179	cds
NM_001001830	81	111	utr5
NM_001001830	112	141	utr5
NM_001001830	142	171	utr5
NM_001001830	191	221	utr5
NM_001001830	222	251	utr5
NM_001001830	241	269	utr5
NM_001001830	331	361	utr5
NM_001001830	541	571	cds
NM_001001830	621	651	cds
NM_001001830	652	681	cds
NM_001001830	691	719	cds
NM_001001830	731	759	cds
NM_001001830	761	791	cds
NM_001001830	792	821	cds
NM_001001830	821	849	cds
NM_001001830	861	889	cds
NM_001001830	961	991	cds
NM_001001830	992	1021	cds
NM_001001830	1081	1109	cds
NM_001001830	1201	1229	cds
NM_001001830	1231	1261	cds
NM_001001830	1262	1291	cds
NM_001001830	1291	1319	cds
NM_001001830	1381	1409	cds
NM_001001830	1451	1479	cds
NM_001001830	1491	1519	cds
NM_001001830	1551	1579	cds
NM_001001830	1581	1609	utr3
NM_001001830	1581	1609	cds
NM_001001830	1611	1641	utr3
NM_001001830	1642	1671	utr3
NM_001001830	1701	1731	utr3
NM_001001830	1732	1761	utr3
NM_001001830	1761	1791	utr3
NM_001001830	1792	1821	utr3
NM_001001830	1821	1851	utr3
NM_001001830	1881	1909	utr3
NM_001001830	1931	1959	utr3
NM_001001830	1981	2011	utr3
NM_001001830	2041	2071	utr3
NM_001001830	2072	2101	utr3
NM_001001830	2121	2151	utr3
NM_001001830	2191	2219	utr3
NM_001001830	2231	2259	utr3
NM_001001830	2291	2321	utr3
NM_001001830	2331	2361	utr3
NM_001001830	2362	2391	utr3
NM_001001830	2392	2421	utr3
NM_001001830	2541	2571	utr3
NM_001001830	2572	2601	utr3
NM_001001830	2611	2639	utr3
NM_001001830	2661	2691	utr3
NM_001001830	2692	2721	utr3
NM_001001830	2722	2751	utr3
NM_001001830	2771	2799	utr3
NM_001001830	2821	2851	utr3
NM_001001830	2852	2881	utr3
NM_001001830	2882	2911	utr3
NM_001001830	2912	2941	utr3
NM_001001830	2961	2991	utr3
NM_001001830	2992	3021	utr3
NM_001001830	3051	3079	utr3
NM_001001830	3081	3109	utr3
NM_001001830	3151	3181	utr3
NM_001001830	3182	3211	utr3
NM_001001830	3212	3241	utr3
NM_001001830	3251	3281	utr3
NM_001001830	3282	3311	utr3
NM_001001830	3321	3351	utr3
NM_001001830	3361	3391	utr3
NM_001001830	3392	3421	utr3
NM_001001830	3422	3451	utr3
NM_001001830	3452	3481	utr3
NM_001001830	3482	3511	utr3
NM_001001830	3521	3551	utr3
NM_001001830	3581	3611	utr3
NM_001001830	3612	3641	utr3
NM_001001830	3642	3671	utr3
NM_001001830	3672	3701	utr3
NM_001001830	3711	3739	utr3
NM_001001832	511	539	cds
NM_001001832	871	899	cds
NM_001001832	951	981	cds
NM_001001832	1291	1321	cds
NM_001001832	1322	1351	cds
NM_001001832	1361	1391	utr3
NM_001001832	1361	1391	cds
NM_001001832	1392	1421	utr3
NM_001001840	341	369	cds
NM_001001840	381	409	cds
NM_001001840	681	709	cds
NM_001001840	921	949	cds
NM_001001840	1001	1031	cds
NM_001001840	1491	1521	cds
NM_001001840	1522	1551	cds
NM_001001840	1552	1581	cds
NM_001001840	1651	1679	cds
NM_001001840	1721	1749	cds
NM_001001840	1751	1781	cds
NM_001001840	1782	1811	cds
NM_001001840	1821	1849	cds
NM_001001840	2041	2069	cds
NM_001001840	2271	2299	cds
NM_001001840	2321	2351	cds
NM_001001840	2352	2381	cds
NM_001001840	2511	2539	cds
NM_001001840	2541	2571	cds
NM_001001840	2572	2601	cds
NM_001001840	2602	2631	cds
NM_001001840	2961	2989	utr3
NM_001001840	3021	3051	utr3
NM_001001840	3052	3081	utr3
NM_001001840	3082	3111	utr3
NM_001001840	3161	3191	utr3
NM_001001840	3192	3221	utr3
NM_001001840	3222	3251	utr3
NM_001001840	3241	3269	utr3
NM_001001840	3311	3341	utr3
NM_001001840	3342	3371	utr3
NM_001001840	3371	3399	utr3
NM_001001844	3401	3429	utr3
NM_001001886	81	109	utr5
NM_001001886	121	149	utr5
NM_001001886	201	229	cds
NM_001001886	261	289	cds
NM_001001886	301	331	cds
NM_001001886	332	361	cds
NM_001001886	362	391	cds
NM_001001886	392	421	cds
NM_001001886	431	459	cds
NM_001001886	631	661	cds
NM_001001886	662	691	cds
NM_001001886	692	721	cds
NM_001001886	741	769	cds
NM_001001886	931	959	cds
NM_001001886	961	989	cds
NM_001001886	1021	1049	cds
NM_001001886	1061	1091	cds
NM_001001886	1092	1121	cds
NM_001001886	1201	1229	cds
NM_001001886	1281	1309	cds
NM_001001886	1531	1561	cds
NM_001001886	1562	1591	cds
NM_001001886	1681	1709	cds
NM_001001886	1711	1739	cds
NM_001001886	1841	1869	cds
NM_001001886	1881	1911	cds
NM_001001886	2021	2051	cds
NM_001001886	2052	2081	cds
NM_001001886	2111	2141	cds
NM_001001886	2142	2171	cds
NM_001001886	2172	2201	cds
NM_001001886	2191	2219	cds
NM_001001886	2241	2271	cds
NM_001001886	2272	2301	cds
NM_001001886	2381	2411	cds
NM_001001886	2412	2441	cds
NM_001001886	2442	2471	cds
NM_001001886	2472	2501	cds
NM_001001886	2502	2531	cds
NM_001001886	2532	2561	cds
NM_001001886	2641	2669	cds
NM_001001886	2681	2709	cds
NM_001001886	2721	2751	cds
NM_001001886	2752	2781	cds
NM_001001886	2782	2811	cds
NM_001001886	2821	2849	cds
NM_001001886	2851	2879	cds
NM_001001886	2971	3001	cds
NM_001001886	3002	3031	cds
NM_001001886	3021	3051	cds
NM_001001886	3052	3081	cds
NM_001001886	3081	3111	cds
NM_001001886	3141	3169	cds
NM_001001886	3191	3221	cds
NM_001001886	3222	3251	cds
NM_001001886	3252	3281	cds
NM_001001886	3282	3311	cds
NM_001001886	3411	3441	utr3
NM_001001886	3442	3471	utr3
NM_001001886	3472	3501	utr3
NM_001001886	3502	3531	utr3
NM_001001886	3532	3561	utr3
NM_001001886	3561	3591	utr3
NM_001001886	3611	3641	utr3
NM_001001886	3642	3671	utr3
NM_001001886	3691	3721	utr3
NM_001001886	3722	3751	utr3
NM_001001886	3741	3771	utr3
NM_001001886	3772	3801	utr3
NM_001001886	3802	3831	utr3
NM_001001886	3832	3861	utr3
NM_001001886	3862	3891	utr3
NM_001001886	3892	3921	utr3
NM_001001886	3961	3991	utr3
NM_001001889	1	31	utr5
NM_001001889	32	61	utr5
NM_001001889	62	91	utr5
NM_001001889	92	121	utr5
NM_001001889	122	151	utr5
NM_001001889	161	191	utr5
NM_001001889	161	191	cds
NM_001001889	281	311	cds
NM_001001889	312	341	cds
NM_001001889	342	371	cds
NM_001001889	461	491	cds
NM_001001889	601	631	cds
NM_001001889	632	661	cds
NM_001001889	661	691	cds
NM_001001889	781	809	cds
NM_001001889	831	859	cds
NM_001001889	911	939	cds
NM_001001889	981	1009	cds
NM_001001889	1041	1071	cds
NM_001001889	1072	1101	cds
NM_001001889	1102	1131	cds
NM_001001889	1151	1179	cds
NM_001001889	1241	1269	cds
NM_001001889	1331	1359	cds
NM_001001889	1491	1519	cds
NM_001001889	1551	1581	cds
NM_001001889	1591	1621	cds
NM_001001889	1651	1679	cds
NM_001001889	1731	1761	cds
NM_001001889	1762	1791	cds
NM_001001889	1801	1831	cds
NM_001001889	1832	1861	cds
NM_001001889	1862	1891	cds
NM_001001889	1892	1921	cds
NM_001001889	1922	1951	cds
NM_001001889	2041	2071	cds
NM_001001889	2072	2101	cds
NM_001001889	2102	2131	cds
NM_001001889	2132	2161	cds
NM_001001889	2161	2189	cds
NM_001001889	2201	2231	cds
NM_001001889	2241	2271	cds
NM_001001889	2281	2311	cds
NM_001001889	2312	2341	cds
NM_001001940	11	41	utr5
NM_001001940	42	71	utr5
NM_001001940	72	101	utr5
NM_001001940	72	101	cds
NM_001001940	221	251	cds
NM_001001940	271	299	cds
NM_001001940	301	331	cds
NM_001001940	332	361	cds
NM_001001940	391	421	cds
NM_001001940	422	451	cds
NM_001001940	481	511	cds
NM_001001940	512	541	cds
NM_001001940	542	571	cds
NM_001001940	681	711	cds
NM_001001940	712	741	cds
NM_001001940	741	771	cds
NM_001001940	781	809	cds
NM_001001940	861	891	cds
NM_001001940	901	929	cds
NM_001001940	971	999	cds
NM_001001940	1021	1049	cds
NM_001001940	1081	1111	cds
NM_001001940	1112	1141	cds
NM_001001940	1151	1181	cds
NM_001001940	1182	1211	cds
NM_001001940	1271	1301	cds
NM_001001940	1302	1331	cds
NM_001001940	1332	1361	cds
NM_001001940	1391	1421	cds
NM_001001940	1431	1459	cds
NM_001001940	1491	1521	cds
NM_001001940	1522	1551	cds
NM_001001940	1561	1589	cds
NM_001001940	1611	1639	cds
NM_001001940	1661	1689	cds
NM_001001940	1711	1739	cds
NM_001001940	1771	1799	cds
NM_001001940	1831	1859	cds
NM_001001940	1881	1911	cds
NM_001001940	1912	1941	cds
NM_001001940	2061	2089	cds
NM_001001940	2101	2131	cds
NM_001001940	2201	2231	cds
NM_001001940	2232	2261	cds
NM_001001940	2331	2361	cds
NM_001001940	2362	2391	cds
NM_001001940	2411	2439	cds
NM_001001940	2531	2561	cds
NM_001001940	2562	2591	cds
NM_001001940	2721	2751	cds
NM_001001940	2752	2781	cds
NM_001001940	2782	2811	cds
NM_001001940	2811	2841	cds
NM_001001940	2881	2909	utr3
NM_001001940	2881	2909	cds
NM_001001940	3041	3071	utr3
NM_001001940	3072	3101	utr3
NM_001001941	31	61	utr5
NM_001001941	62	91	utr5
NM_001001941	92	121	utr5
NM_001001941	92	121	cds
NM_001001941	181	209	cds
NM_001001941	211	239	cds
NM_001001941	271	301	cds
NM_001001941	302	331	cds
NM_001001941	371	401	cds
NM_001001941	471	501	cds
NM_001001941	502	531	cds
NM_001001941	791	821	cds
NM_001001941	851	879	cds
NM_001001941	911	941	cds
NM_001001941	942	971	cds
NM_001001941	1081	1111	cds
NM_001001941	1112	1141	cds
NM_001001941	1221	1251	cds
NM_001001941	1252	1281	cds
NM_001001941	1282	1311	cds
NM_001001941	1312	1341	cds
NM_001001941	1341	1371	cds
NM_001001941	1372	1401	cds
NM_001001941	1401	1429	cds
NM_001001941	1451	1481	cds
NM_001001941	1541	1571	cds
NM_001001941	1621	1651	cds
NM_001001941	1701	1729	cds
NM_001001941	1731	1761	cds
NM_001001941	1911	1939	cds
NM_001001941	2011	2039	cds
NM_001001941	2071	2101	cds
NM_001001941	2102	2131	cds
NM_001001941	2151	2181	cds
NM_001001941	2182	2211	cds
NM_001001941	2261	2289	cds
NM_001001941	2341	2369	cds
NM_001001941	2391	2421	cds
NM_001001941	2422	2451	cds
NM_001001941	2561	2589	cds
NM_001001941	2601	2631	cds
NM_001001941	2632	2661	cds
NM_001001941	2791	2821	cds
NM_001001941	2822	2851	cds
NM_001001941	2851	2881	cds
NM_001001941	2882	2911	cds
NM_001001941	2912	2941	cds
NM_001001941	2942	2971	cds
NM_001001941	2972	3001	cds
NM_001001941	3011	3039	cds
NM_001001941	3181	3211	cds
NM_001001941	3212	3241	cds
NM_001001941	3242	3271	cds
NM_001001941	3272	3301	cds
NM_001001941	3301	3331	cds
NM_001001941	3332	3361	cds
NM_001001941	3361	3389	cds
NM_001001941	3391	3421	cds
NM_001001941	3422	3451	cds
NM_001001941	3471	3501	cds
NM_001001941	3502	3531	cds
NM_001001941	3531	3561	cds
NM_001001941	3562	3591	cds
NM_001001941	3592	3621	cds
NM_001001941	3622	3651	cds
NM_001001941	3641	3669	cds
NM_001001941	3691	3719	cds
NM_001001941	3751	3781	cds
NM_001001941	3821	3851	utr3
NM_001001941	3852	3881	utr3
NM_001001941	3882	3911	utr3
NM_001001941	3912	3941	utr3
NM_001001941	3942	3971	utr3
NM_001001941	3972	4001	utr3
NM_001001941	4011	4041	utr3
NM_001001941	4042	4071	utr3
NM_001001943	341	369	cds
NM_001001943	371	399	cds
NM_001001943	501	529	cds
NM_001001943	531	559	cds
NM_001001943	1311	1339	cds
NM_001001943	1441	1469	cds
NM_001001943	1471	1501	cds
NM_001001943	1671	1701	cds
NM_001001943	1702	1731	cds
NM_001001943	1732	1761	cds
NM_001001943	1762	1791	cds
NM_001001943	1791	1821	cds
NM_001001943	1822	1851	cds
NM_001001943	1891	1919	cds
NM_001001943	1921	1951	cds
NM_001001943	2111	2139	cds
NM_001001943	2161	2191	cds
NM_001001943	2192	2221	cds
NM_001001943	2222	2251	cds
NM_001001943	2252	2281	cds
NM_001001943	2291	2319	cds
NM_001001943	2381	2409	utr3
NM_001001943	2461	2489	utr3
NM_001001943	2491	2519	utr3
NM_001001943	2551	2579	utr3
NM_001001943	2651	2679	utr3
NM_001001943	2681	2709	utr3
NM_001001943	2731	2761	utr3
NM_001001943	2762	2791	utr3
NM_001001943	2801	2829	utr3
NM_001001943	2951	2981	utr3
NM_001001943	2982	3011	utr3
NM_001001943	3091	3121	utr3
NM_001001943	3122	3151	utr3
NM_001001943	3152	3181	utr3
NM_001001943	3182	3211	utr3
NM_001001943	3271	3301	utr3
NM_001001943	3302	3331	utr3
NM_001001943	3332	3361	utr3
NM_001001943	3362	3391	utr3
NM_001001943	3401	3429	utr3
NM_001001943	3521	3551	utr3
NM_001001943	3552	3581	utr3
NM_001001943	3582	3611	utr3
NM_001001943	3611	3641	utr3
NM_001001943	3642	3671	utr3
NM_001001943	3672	3701	utr3
NM_001001943	3711	3739	utr3
NM_001001943	3761	3791	utr3
NM_001001943	3821	3849	utr3
NM_001001943	3891	3919	utr3
NM_001001943	3931	3959	utr3
NM_001001943	4271	4299	utr3
NM_001001943	4311	4341	utr3
NM_001001944	71	101	utr5
NM_001001944	102	131	utr5
NM_001001944	132	161	utr5
NM_001001944	201	231	cds
NM_001001944	311	339	cds
NM_001001944	351	381	cds
NM_001001944	382	411	cds
NM_001001944	412	441	cds
NM_001001944	551	581	cds
NM_001001944	582	611	cds
NM_001001944	612	641	cds
NM_001001944	642	671	cds
NM_001001944	671	699	cds
NM_001001944	761	791	cds
NM_001001944	792	821	cds
NM_001001944	911	941	cds
NM_001001944	942	971	cds
NM_001001944	972	1001	cds
NM_001001944	1031	1061	cds
NM_001001944	1062	1091	cds
NM_001001944	1141	1171	cds
NM_001001944	1181	1211	cds
NM_001001944	1212	1241	cds
NM_001001944	1281	1309	cds
NM_001001944	1401	1431	cds
NM_001001944	1432	1461	cds
NM_001001944	1611	1641	cds
NM_001001944	1642	1671	cds
NM_001001944	1672	1701	cds
NM_001001944	1841	1869	cds
NM_001001944	1901	1931	cds
NM_001001944	1932	1961	cds
NM_001001944	2041	2071	cds
NM_001001944	2072	2101	cds
NM_001001944	2221	2251	cds
NM_001001944	2252	2281	cds
NM_001001944	2321	2349	cds
NM_001001944	2351	2381	cds
NM_001001944	2382	2411	cds
NM_001001944	2421	2451	cds
NM_001001944	2452	2481	cds
NM_001001944	2561	2589	cds
NM_001001944	2591	2621	cds
NM_001001944	2701	2729	cds
NM_001001944	2761	2791	cds
NM_001001944	2792	2821	cds
NM_001001944	2822	2851	cds
NM_001001944	3071	3101	utr3
NM_001001944	3102	3131	utr3
NM_001001944	3161	3191	utr3
NM_001001944	3221	3251	utr3
NM_001001944	3252	3281	utr3
NM_001001944	3282	3311	utr3
NM_001001944	3312	3341	utr3
NM_001001944	3342	3371	utr3
NM_001001944	3372	3401	utr3
NM_001001944	3391	3421	utr3
NM_001001944	3471	3499	utr3
NM_001001944	3521	3551	utr3
NM_001001944	3552	3581	utr3
NM_001001944	3582	3611	utr3
NM_001001944	3651	3679	utr3
NM_001001944	3721	3751	utr3
NM_001001944	3752	3781	utr3
NM_001001944	3871	3899	utr3
NM_001001948	21	51	cds
NM_001001948	52	81	cds
NM_001001948	82	111	cds
NM_001001948	291	321	cds
NM_001001948	322	351	cds
NM_001001948	401	431	cds
NM_001001948	432	461	cds
NM_001001948	471	501	cds
NM_001001948	531	561	cds
NM_001001948	562	591	cds
NM_001001948	661	689	cds
NM_001001948	731	759	cds
NM_001001948	781	809	cds
NM_001001948	841	869	cds
NM_001001948	871	901	cds
NM_001001948	902	931	cds
NM_001001948	931	961	cds
NM_001001948	962	991	cds
NM_001001948	1011	1041	cds
NM_001001948	1042	1071	cds
NM_001001948	1181	1211	cds
NM_001001948	1212	1241	cds
NM_001001948	1271	1299	cds
NM_001001948	1301	1329	cds
NM_001001948	1351	1381	cds
NM_001001948	1451	1481	cds
NM_001001948	1482	1511	cds
NM_001001948	1501	1531	cds
NM_001001948	1532	1561	cds
NM_001002013	101	129	utr5
NM_001002013	101	129	cds
NM_001002013	131	161	cds
NM_001002013	251	281	cds
NM_001002013	282	311	cds
NM_001002013	321	349	cds
NM_001002013	421	451	cds
NM_001002013	452	481	cds
NM_001002013	601	629	cds
NM_001002013	631	661	cds
NM_001002013	662	691	cds
NM_001002013	731	761	cds
NM_001002013	762	791	cds
NM_001002013	821	849	cds
NM_001002013	931	961	cds
NM_001002013	962	991	cds
NM_001002013	1011	1041	cds
NM_001002013	1042	1071	cds
NM_001002013	1141	1169	cds
NM_001002013	1171	1201	cds
NM_001002013	1202	1231	cds
NM_001002013	1391	1419	cds
NM_001002013	1421	1449	cds
NM_001002013	1471	1499	cds
NM_001002013	1541	1569	cds
NM_001002013	1631	1661	cds
NM_001002013	1681	1709	cds
NM_001002013	1751	1781	cds
NM_001002013	1782	1811	cds
NM_001002013	1812	1841	cds
NM_001002013	1842	1871	cds
NM_001002013	1861	1889	cds
NM_001002013	1931	1959	cds
NM_001002013	2031	2061	cds
NM_001002013	2062	2091	cds
NM_001002013	2092	2121	cds
NM_001002013	2151	2179	cds
NM_001002013	2181	2209	cds
NM_001002013	2271	2301	cds
NM_001002013	2302	2331	cds
NM_001002013	2332	2361	cds
NM_001002013	2361	2391	cds
NM_001002013	2392	2421	cds
NM_001002013	2431	2461	cds
NM_001002013	2521	2551	cds
NM_001002013	2552	2581	cds
NM_001002013	2581	2609	cds
NM_001002013	2631	2661	cds
NM_001002013	2662	2691	cds
NM_001002013	2881	2911	cds
NM_001002013	2921	2949	cds
NM_001002013	2971	3001	utr3
NM_001002013	3002	3031	utr3
NM_001002013	3032	3061	utr3
NM_001002013	3062	3091	utr3
NM_001002013	3092	3121	utr3
NM_001002013	3122	3151	utr3
NM_001002013	3152	3181	utr3
NM_001002037	161	191	cds
NM_001002037	192	221	cds
NM_001002037	222	251	cds
NM_001002037	301	329	cds
NM_001002037	371	399	cds
NM_001002037	551	581	cds
NM_001002037	582	611	cds
NM_001002037	701	729	cds
NM_001002037	751	779	cds
NM_001002037	791	819	cds
NM_001002037	881	909	cds
NM_001002037	1071	1101	cds
NM_001002037	1102	1131	cds
NM_001002037	1161	1191	cds
NM_001002037	1192	1221	cds
NM_001002037	1261	1289	cds
NM_001002037	1321	1349	cds
NM_001002037	1511	1541	cds
NM_001002037	1542	1571	cds
NM_001002037	1601	1631	cds
NM_001002037	1632	1661	cds
NM_001002037	1662	1691	cds
NM_001002037	1681	1711	cds
NM_001002037	1712	1741	cds
NM_001002037	1742	1771	cds
NM_001002037	1772	1801	cds
NM_001002037	1801	1829	cds
NM_001002037	1831	1861	cds
NM_001002037	1862	1891	cds
NM_001002037	1881	1911	cds
NM_001002037	1991	2019	cds
NM_001002037	2021	2049	utr3
NM_001002037	2021	2049	cds
NM_001002041	31	59	utr5
NM_001002041	61	89	utr5
NM_001002041	91	119	utr5
NM_001002041	91	119	cds
NM_001002041	281	309	cds
NM_001002041	991	1021	cds
NM_001002041	1022	1051	cds
NM_001002041	1151	1179	cds
NM_001002041	1201	1229	cds
NM_001002041	1231	1261	cds
NM_001002041	1262	1291	cds
NM_001002041	1341	1369	cds
NM_001002041	1411	1439	cds
NM_001002041	1441	1469	cds
NM_001002041	1471	1499	cds
NM_001002041	1591	1619	cds
NM_001002041	1681	1709	cds
NM_001002041	1821	1851	cds
NM_001002041	1852	1881	cds
NM_001002041	1871	1899	cds
NM_001002041	2291	2321	cds
NM_001002041	2322	2351	cds
NM_001002041	2411	2441	utr3
NM_001002041	2442	2471	utr3
NM_001002042	41	69	cds
NM_001002042	161	191	cds
NM_001002042	331	359	cds
NM_001002042	421	449	cds
NM_001002042	551	579	cds
NM_001002042	711	741	cds
NM_001002042	742	771	cds
NM_001002042	771	799	cds
NM_001002042	831	859	cds
NM_001002042	1001	1029	cds
NM_001002042	1061	1089	cds
NM_001002042	1351	1379	cds
NM_001002042	1521	1551	cds
NM_001002042	1552	1581	cds
NM_001002042	1571	1599	cds
NM_001002042	1911	1941	cds
NM_001002042	1942	1971	cds
NM_001002042	1961	1989	cds
NM_001002042	2021	2049	cds
NM_001002042	2091	2119	cds
NM_001002042	2141	2171	cds
NM_001002042	2172	2201	cds
NM_001002042	2202	2231	cds
NM_001002042	2232	2261	cds
NM_001002042	2341	2369	cds
NM_001002042	2661	2689	cds
NM_001002042	2771	2799	cds
NM_001002042	2871	2901	cds
NM_001002042	2921	2951	cds
NM_001002042	2952	2981	cds
NM_001002042	2982	3011	cds
NM_001002042	3012	3041	cds
NM_001002042	3061	3089	cds
NM_001002042	3141	3169	cds
NM_001002042	3191	3221	cds
NM_001002042	3222	3251	cds
NM_001002042	3241	3271	cds
NM_001002042	3272	3301	cds
NM_001002042	3311	3339	cds
NM_001002042	3371	3401	cds
NM_001002042	3402	3431	cds
NM_001002042	3431	3459	cds
NM_001002042	3461	3489	cds
NM_001002042	3511	3541	cds
NM_001002042	3542	3571	cds
NM_001002042	3651	3681	cds
NM_001002042	3682	3711	cds
NM_001002042	3791	3819	cds
NM_001002046	571	601	utr3
NM_001002047	71	99	utr5
NM_001002047	71	99	cds
NM_001002047	101	129	cds
NM_001002047	131	161	cds
NM_001002047	162	191	cds
NM_001002047	421	449	cds
NM_001002047	491	519	cds
NM_001002047	611	641	cds
NM_001002047	741	771	utr3
NM_001002047	772	801	utr3
NM_001002047	851	879	utr3
NM_001002047	901	929	utr3
NM_001002047	1001	1029	utr3
NM_001002050	41	71	utr5
NM_001002050	72	101	utr5
NM_001002050	102	131	utr5
NM_001002050	132	161	utr5
NM_001002050	281	311	cds
NM_001002050	312	341	cds
NM_001002050	361	389	cds
NM_001002050	401	431	cds
NM_001002050	432	461	cds
NM_001002050	481	509	cds
NM_001002050	531	561	cds
NM_001002050	562	591	cds
NM_001002050	611	641	cds
NM_001002050	642	671	cds
NM_001002050	672	701	cds
NM_001002050	702	731	cds
NM_001002050	761	791	cds
NM_001002050	792	821	cds
NM_001002050	822	851	cds
NM_001002050	881	911	cds
NM_001002050	912	941	cds
NM_001002050	942	971	utr3
NM_001002050	942	971	cds
NM_001002050	972	1001	utr3
NM_001002050	1002	1031	utr3
NM_001002050	1032	1061	utr3
NM_001002050	1062	1091	utr3
NM_001002053	31	61	utr5
NM_001002053	62	91	utr5
NM_001002053	111	139	utr5
NM_001002053	141	169	utr5
NM_001002053	141	169	cds
NM_001002053	301	329	cds
NM_001002053	331	361	cds
NM_001002053	362	391	cds
NM_001002053	471	499	cds
NM_001002053	501	531	cds
NM_001002053	532	561	cds
NM_001002053	562	591	cds
NM_001002053	721	749	utr3
NM_001002053	771	799	utr3
NM_001002053	801	829	utr3
NM_001002053	921	951	utr3
NM_001002053	952	981	utr3
NM_001002055	71	99	cds
NM_001002055	201	231	cds
NM_001002055	232	261	cds
NM_001002055	261	289	cds
NM_001002055	301	331	cds
NM_001002055	332	361	cds
NM_001002055	362	391	cds
NM_001002055	391	421	cds
NM_001002055	422	451	cds
NM_001002055	491	519	cds
NM_001002055	601	629	cds
NM_001002055	641	671	cds
NM_001002055	672	701	cds
NM_001002055	761	789	cds
NM_001002055	881	909	cds
NM_001002055	941	971	cds
NM_001002055	972	1001	cds
NM_001002055	991	1019	cds
NM_001002055	1061	1091	cds
NM_001002055	1092	1121	cds
NM_001002055	1121	1151	cds
NM_001002055	1161	1191	cds
NM_001002055	1192	1221	cds
NM_001002055	1331	1359	cds
NM_001002055	1371	1399	utr3
NM_001002055	1421	1451	utr3
NM_001002055	1452	1481	utr3
NM_001002055	1501	1529	utr3
NM_001002055	1591	1621	utr3
NM_001002055	1622	1651	utr3
NM_001002056	31	59	utr5
NM_001002056	61	91	utr5
NM_001002056	61	91	cds
NM_001002056	92	121	cds
NM_001002056	201	229	cds
NM_001002056	231	259	cds
NM_001002056	271	301	cds
NM_001002056	302	331	cds
NM_001002056	321	349	cds
NM_001002056	421	451	cds
NM_001002056	452	481	cds
NM_001002056	571	599	cds
NM_001002056	721	751	cds
NM_001002056	752	781	cds
NM_001002056	811	841	cds
NM_001002056	881	911	cds
NM_001002056	912	941	cds
NM_001002056	942	971	cds
NM_001002056	972	1001	cds
NM_001002056	1001	1029	cds
NM_001002056	1061	1091	cds
NM_001002056	1092	1121	cds
NM_001002056	1122	1151	cds
NM_001002056	1211	1239	cds
NM_001002056	1271	1299	cds
NM_001002057	1	31	utr5
NM_001002057	32	61	utr5
NM_001002057	62	91	utr5
NM_001002057	62	91	cds
NM_001002057	81	109	utr5
NM_001002057	81	109	cds
NM_001002057	121	149	cds
NM_001002057	191	219	cds
NM_001002057	261	289	cds
NM_001002057	361	391	cds
NM_001002057	392	421	cds
NM_001002057	511	541	cds
NM_001002057	542	571	cds
NM_001002057	572	601	cds
NM_001002057	602	631	cds
NM_001002057	751	779	cds
NM_001002057	801	831	cds
NM_001002057	832	861	cds
NM_001002057	891	921	cds
NM_001002057	941	971	cds
NM_001002057	991	1019	utr3
NM_001002057	1021	1049	utr3
NM_001002057	1051	1079	utr3
NM_001002058	11	39	utr5
NM_001002058	51	81	utr5
NM_001002058	91	121	utr5
NM_001002058	122	151	utr5
NM_001002058	151	181	utr5
NM_001002058	151	181	cds
NM_001002058	182	211	cds
NM_001002058	241	271	cds
NM_001002058	272	301	cds
NM_001002058	291	321	cds
NM_001002058	401	429	cds
NM_001002058	451	481	cds
NM_001002058	482	511	cds
NM_001002058	512	541	cds
NM_001002058	542	571	cds
NM_001002058	661	689	cds
NM_001002058	741	769	cds
NM_001002058	801	829	cds
NM_001002058	831	861	cds
NM_001002058	862	891	cds
NM_001002058	892	921	cds
NM_001002058	951	981	cds
NM_001002058	982	1011	cds
NM_001002058	1011	1041	cds
NM_001002058	1042	1071	cds
NM_001002058	1072	1101	cds
NM_001002058	1102	1131	cds
NM_001002058	1171	1199	cds
NM_001002058	1221	1249	utr3
NM_001002058	1281	1309	utr3
NM_001002058	1331	1361	utr3
NM_001002058	1362	1391	utr3
NM_001002058	1401	1429	utr3
NM_001002061	921	949	utr3
NM_001002061	1021	1049	utr3
NM_001002061	1101	1129	utr3
NM_001002063	41	71	utr5
NM_001002063	72	101	utr5
NM_001002063	102	131	utr5
NM_001002063	132	161	utr5
NM_001002063	162	191	utr5
NM_001002063	251	281	cds
NM_001002063	282	311	cds
NM_001002063	431	459	cds
NM_001002063	461	489	cds
NM_001002063	601	631	cds
NM_001002063	651	679	cds
NM_001002063	691	719	cds
NM_001002063	741	769	cds
NM_001002063	771	801	cds
NM_001002063	802	831	cds
NM_001002063	832	861	cds
NM_001002063	862	891	cds
NM_001002063	892	921	cds
NM_001002063	1131	1161	cds
NM_001002063	1162	1191	cds
NM_001002063	1271	1301	cds
NM_001002063	1381	1409	cds
NM_001002063	1461	1491	cds
NM_001002063	1492	1521	cds
NM_001002063	1522	1551	cds
NM_001002063	1561	1591	cds
NM_001002063	1611	1639	cds
NM_001002063	1641	1669	cds
NM_001002063	1671	1701	cds
NM_001002063	1702	1731	cds
NM_001002063	1732	1761	cds
NM_001002063	1751	1781	cds
NM_001002063	1782	1811	cds
NM_001002063	1801	1831	cds
NM_001002063	1832	1861	cds
NM_001002063	1951	1981	cds
NM_001002064	241	271	cds
NM_001002064	272	301	cds
NM_001002064	331	361	cds
NM_001002064	362	391	cds
NM_001002064	411	439	cds
NM_001002064	461	491	cds
NM_001002064	492	521	cds
NM_001002064	531	561	cds
NM_001002064	562	591	cds
NM_001002064	592	621	cds
NM_001002064	611	639	cds
NM_001002064	641	671	cds
NM_001002064	672	701	cds
NM_001002064	741	769	cds
NM_001002064	791	821	cds
NM_001002064	822	851	cds
NM_001002064	851	881	cds
NM_001002064	882	911	cds
NM_001002064	921	951	cds
NM_001002064	952	981	cds
NM_001002064	982	1011	cds
NM_001002064	1012	1041	cds
NM_001002064	1042	1071	cds
NM_001002064	1101	1129	cds
NM_001002064	1131	1159	cds
NM_001002064	1181	1211	cds
NM_001002064	1241	1271	cds
NM_001002064	1281	1311	cds
NM_001002064	1312	1341	cds
NM_001002064	1342	1371	cds
NM_001002064	1372	1401	utr3
NM_001002064	1372	1401	cds
NM_001002064	1402	1431	utr3
NM_001002064	1432	1461	utr3
NM_001002064	1461	1489	utr3
NM_001002064	1491	1519	utr3
NM_001002064	1531	1561	utr3
NM_001002064	1562	1591	utr3
NM_001002065	221	249	cds
NM_001002065	721	751	cds
NM_001002065	752	781	cds
NM_001002065	782	811	cds
NM_001002065	812	841	cds
NM_001002065	961	989	cds
NM_001002065	1091	1119	cds
NM_001002065	1121	1149	cds
NM_001002065	1161	1191	cds
NM_001002065	1192	1221	utr3
NM_001002065	1192	1221	cds
NM_001002065	1281	1309	utr3
NM_001002065	1311	1341	utr3
NM_001002065	1342	1371	utr3
NM_001002065	1401	1429	utr3
NM_001002065	1431	1459	utr3
NM_001002067	21	51	utr5
NM_001002067	52	81	utr5
NM_001002067	82	111	utr5
NM_001002067	111	139	utr5
NM_001002067	141	169	utr5
NM_001002067	141	169	cds
NM_001002067	171	199	cds
NM_001002067	211	239	cds
NM_001002067	281	309	cds
NM_001002067	441	471	cds
NM_001002067	472	501	cds
NM_001002067	511	541	utr3
NM_001002067	511	541	cds
NM_001002067	542	571	utr3
NM_001002067	572	601	utr3
NM_001002067	591	619	utr3
NM_001002067	671	701	utr3
NM_001002067	702	731	utr3
NM_001002068	1	31	utr5
NM_001002068	32	61	utr5
NM_001002068	62	91	utr5
NM_001002068	62	91	cds
NM_001002068	111	139	cds
NM_001002068	251	281	cds
NM_001002068	331	361	cds
NM_001002068	362	391	cds
NM_001002068	392	421	utr3
NM_001002068	392	421	cds
NM_001002068	422	451	utr3
NM_001002068	452	481	utr3
NM_001002068	482	511	utr3
NM_001002068	551	579	utr3
NM_001002068	621	651	utr3
NM_001002068	652	681	utr3
NM_001002068	671	701	utr3
NM_001002068	702	731	utr3
NM_001002068	741	769	utr3
NM_001002069	1	31	utr5
NM_001002069	1	31	cds
NM_001002069	32	61	cds
NM_001002069	62	91	cds
NM_001002069	131	161	cds
NM_001002069	251	281	cds
NM_001002069	282	311	cds
NM_001002070	311	339	cds
NM_001002070	421	451	cds
NM_001002070	452	481	cds
NM_001002070	501	529	cds
NM_001002070	551	579	cds
NM_001002070	591	619	cds
NM_001002070	661	689	cds
NM_001002070	711	739	cds
NM_001002070	771	801	cds
NM_001002070	861	889	cds
NM_001002070	891	919	cds
NM_001002070	921	951	cds
NM_001002070	952	981	cds
NM_001002070	982	1011	cds
NM_001002070	1012	1041	cds
NM_001002070	1071	1101	cds
NM_001002070	1102	1131	cds
NM_001002070	1132	1161	cds
NM_001002070	1161	1189	cds
NM_001002070	1191	1219	cds
NM_001002071	101	129	cds
NM_001002071	541	569	cds
NM_001002071	1051	1081	cds
NM_001002072	41	69	cds
NM_001002072	141	169	cds
NM_001002072	181	211	cds
NM_001002072	212	241	cds
NM_001002072	242	271	cds
NM_001002072	301	329	cds
NM_001002072	341	369	cds
NM_001002072	371	401	cds
NM_001002072	402	431	cds
NM_001002072	421	449	cds
NM_001002072	471	501	cds
NM_001002072	581	611	utr3
NM_001002072	621	649	utr3
NM_001002072	651	679	utr3
NM_001002072	741	769	utr3
NM_001002072	841	871	utr3
NM_001002072	872	901	utr3
NM_001002072	902	931	utr3
NM_001002072	971	999	utr3
NM_001002072	1011	1041	utr3
NM_001002072	1042	1071	utr3
NM_001002072	1072	1101	utr3
NM_001002072	1102	1131	utr3
NM_001002073	41	71	utr5
NM_001002073	72	101	utr5
NM_001002073	161	189	cds
NM_001002073	221	249	cds
NM_001002073	331	359	cds
NM_001002073	381	409	cds
NM_001002073	451	479	utr3
NM_001002073	501	531	utr3
NM_001002073	532	561	utr3
NM_001002073	561	589	utr3
NM_001002073	651	681	utr3
NM_001002073	682	711	utr3
NM_001002073	731	761	utr3
NM_001002073	762	791	utr3
NM_001002073	792	821	utr3
NM_001002073	811	841	utr3
NM_001002073	842	871	utr3
NM_001002073	861	889	utr3
NM_001002073	921	951	utr3
NM_001002073	952	981	utr3
NM_001002073	1061	1091	utr3
NM_001002073	1092	1121	utr3
NM_001002077	41	71	utr5
NM_001002077	72	101	utr5
NM_001002077	72	101	cds
NM_001002077	102	131	cds
NM_001002077	381	411	utr3
NM_001002077	412	441	utr3
NM_001002078	31	61	utr5
NM_001002078	62	91	utr5
NM_001002078	62	91	cds
NM_001002078	141	169	cds
NM_001002078	211	239	utr3
NM_001002078	211	239	cds
NM_001002078	321	351	utr3
NM_001002078	352	381	utr3
NM_001002079	41	71	cds
NM_001002079	72	101	cds
NM_001002079	141	171	cds
NM_001002079	172	201	cds
NM_001002079	261	291	cds
NM_001002079	292	321	cds
NM_001002079	322	351	cds
NM_001002079	341	371	cds
NM_001002079	372	401	cds
NM_001002079	402	431	cds
NM_001002079	431	461	cds
NM_001002080	1911	1939	cds
NM_001002080	2061	2089	cds
NM_001002080	2091	2121	cds
NM_001002080	2211	2239	cds
NM_001002080	2251	2281	cds
NM_001002080	2401	2429	cds
NM_001002080	2641	2671	cds
NM_001002080	2672	2701	cds
NM_001002080	2721	2749	cds
NM_001002080	2781	2811	cds
NM_001002080	2812	2841	cds
NM_001002080	2842	2871	cds
NM_001002080	2971	3001	cds
NM_001002080	3002	3031	cds
NM_001002080	3032	3061	cds
NM_001002080	3062	3091	cds
NM_001002080	3151	3181	cds
NM_001002080	3182	3211	cds
NM_001002080	3221	3249	cds
NM_001002080	3271	3301	cds
NM_001002080	3302	3331	cds
NM_001002080	3321	3349	cds
NM_001002081	1	31	utr5
NM_001002081	32	61	utr5
NM_001002081	32	61	cds
NM_001002081	121	151	cds
NM_001002081	181	209	cds
NM_001002081	261	291	cds
NM_001002081	292	321	cds
NM_001002081	322	351	cds
NM_001002081	371	401	cds
NM_001002081	411	441	cds
NM_001002081	442	471	utr3
NM_001002081	442	471	cds
NM_001002081	472	501	utr3
NM_001002082	11	41	utr5
NM_001002082	42	71	utr5
NM_001002082	42	71	cds
NM_001002082	131	159	cds
NM_001002082	221	249	cds
NM_001002082	361	389	cds
NM_001002082	741	771	utr3
NM_001002082	791	821	utr3
NM_001002082	822	851	utr3
NM_001002082	861	891	utr3
NM_001002082	892	921	utr3
NM_001002083	821	849	utr3
NM_001002083	891	919	utr3
NM_001002086	11	39	utr5
NM_001002086	81	111	utr5
NM_001002086	112	141	utr5
NM_001002086	181	209	cds
NM_001002086	271	301	cds
NM_001002086	302	331	cds
NM_001002086	321	351	cds
NM_001002086	401	431	cds
NM_001002086	432	461	cds
NM_001002086	511	541	cds
NM_001002086	542	571	cds
NM_001002086	572	601	cds
NM_001002086	701	731	cds
NM_001002086	801	831	utr3
NM_001002086	832	861	utr3
NM_001002086	862	891	utr3
NM_001002086	892	921	utr3
NM_001002086	922	951	utr3
NM_001002086	952	981	utr3
NM_001002086	982	1011	utr3
NM_001002086	1001	1029	utr3
NM_001002086	1031	1061	utr3
NM_001002086	1062	1091	utr3
NM_001002086	1092	1121	utr3
NM_001002086	1122	1151	utr3
NM_001002086	1151	1181	utr3
NM_001002086	1191	1221	utr3
NM_001002086	1222	1251	utr3
NM_001002086	1251	1279	utr3
NM_001002089	11	39	utr5
NM_001002089	181	209	utr5
NM_001002089	291	321	cds
NM_001002089	322	351	cds
NM_001002089	451	481	cds
NM_001002089	482	511	cds
NM_001002089	512	541	cds
NM_001002089	542	571	cds
NM_001002089	601	629	cds
NM_001002089	641	669	cds
NM_001002089	711	739	cds
NM_001002089	781	811	cds
NM_001002089	871	901	cds
NM_001002089	902	931	cds
NM_001002089	1061	1089	cds
NM_001002089	1141	1171	cds
NM_001002089	1172	1201	cds
NM_001002089	1202	1231	cds
NM_001002089	1241	1271	cds
NM_001002089	1291	1319	cds
NM_001002089	1401	1429	cds
NM_001002089	1431	1461	cds
NM_001002089	1462	1491	utr3
NM_001002089	1501	1531	utr3
NM_001002089	1532	1561	utr3
NM_001002089	1611	1639	utr3
NM_001002089	1681	1711	utr3
NM_001002089	1712	1741	utr3
NM_001002097	21	51	utr5
NM_001002097	21	51	cds
NM_001002097	311	339	utr3
NM_001002097	351	379	utr3
NM_001002097	421	449	utr3
NM_001002097	461	491	utr3
NM_001002097	551	581	utr3
NM_001002097	661	691	utr3
NM_001002097	711	741	utr3
NM_001002097	742	771	utr3
NM_001002097	772	801	utr3
NM_001002097	861	891	utr3
NM_001002097	892	921	utr3
NM_001002097	922	951	utr3
NM_001002099	11	39	utr5
NM_001002099	41	71	utr5
NM_001002099	111	141	utr5
NM_001002099	111	141	cds
NM_001002099	251	279	cds
NM_001002099	291	321	cds
NM_001002099	322	351	cds
NM_001002099	352	381	cds
NM_001002099	501	531	cds
NM_001002099	532	561	cds
NM_001002099	562	591	cds
NM_001002099	581	611	cds
NM_001002099	631	659	cds
NM_001002099	771	801	cds
NM_001002099	802	831	cds
NM_001002099	832	861	cds
NM_001002099	861	889	cds
NM_001002099	891	921	cds
NM_001002099	922	951	cds
NM_001002099	961	991	cds
NM_001002099	992	1021	cds
NM_001002099	1022	1051	utr3
NM_001002099	1022	1051	cds
NM_001002099	1052	1081	utr3
NM_001002099	1121	1151	utr3
NM_001002099	1152	1181	utr3
NM_001002099	1182	1211	utr3
NM_001002099	1212	1241	utr3
NM_001002099	1242	1271	utr3
NM_001002099	1321	1351	utr3
NM_001002099	1352	1381	utr3
NM_001002099	1371	1401	utr3
NM_001002099	1402	1431	utr3
NM_001002099	1432	1461	utr3
NM_001002099	1451	1481	utr3
NM_001002099	1482	1511	utr3
NM_001002099	1512	1541	utr3
NM_001002099	1542	1571	utr3
NM_001002099	1571	1599	utr3
NM_001002104	11	41	utr5
NM_001002104	42	71	utr5
NM_001002104	42	71	cds
NM_001002104	81	109	cds
NM_001002104	201	231	cds
NM_001002104	232	261	cds
NM_001002104	271	299	cds
NM_001002104	301	329	cds
NM_001002104	341	371	cds
NM_001002104	372	401	cds
NM_001002104	402	431	cds
NM_001002104	421	451	cds
NM_001002104	452	481	cds
NM_001002104	482	511	cds
NM_001002104	511	541	cds
NM_001002104	542	571	cds
NM_001002104	721	751	cds
NM_001002104	752	781	cds
NM_001002104	782	811	cds
NM_001002104	911	939	cds
NM_001002104	941	971	cds
NM_001002104	972	1001	utr3
NM_001002104	972	1001	cds
NM_001002104	1002	1031	utr3
NM_001002104	1161	1191	utr3
NM_001002104	1192	1221	utr3
NM_001002104	1222	1251	utr3
NM_001002104	1251	1281	utr3
NM_001002104	1282	1311	utr3
NM_001002104	1312	1341	utr3
NM_001002104	1441	1471	utr3
NM_001002104	1481	1511	utr3
NM_001002104	1512	1541	utr3
NM_001002105	361	389	cds
NM_001002105	431	459	cds
NM_001002105	1521	1549	cds
NM_001002106	1	29	utr5
NM_001002106	81	111	cds
NM_001002106	112	141	cds
NM_001002106	142	171	cds
NM_001002106	172	201	cds
NM_001002106	221	251	cds
NM_001002106	252	281	cds
NM_001002106	282	311	cds
NM_001002106	361	391	cds
NM_001002106	392	421	cds
NM_001002106	422	451	cds
NM_001002106	452	481	cds
NM_001002106	482	511	cds
NM_001002106	541	569	cds
NM_001002106	581	611	cds
NM_001002106	612	641	cds
NM_001002106	642	671	cds
NM_001002106	672	701	cds
NM_001002106	691	719	cds
NM_001002106	741	769	cds
NM_001002106	801	831	cds
NM_001002106	832	861	cds
NM_001002106	871	901	cds
NM_001002106	902	931	cds
NM_001002106	971	1001	utr3
NM_001002108	11	41	utr5
NM_001002108	231	261	cds
NM_001002108	262	291	cds
NM_001002108	381	409	cds
NM_001002108	471	501	cds
NM_001002108	561	591	cds
NM_001002108	592	621	cds
NM_001002108	622	651	cds
NM_001002108	641	671	cds
NM_001002108	691	721	cds
NM_001002108	771	799	utr3
NM_001002108	801	831	utr3
NM_001002108	832	861	utr3
NM_001002111	701	729	utr3
NM_001002111	741	771	utr3
NM_001002111	772	801	utr3
NM_001002111	801	829	utr3
NM_001002111	831	859	utr3
NM_001002111	881	911	utr3
NM_001002111	912	941	utr3
NM_001002113	11	41	utr5
NM_001002113	42	71	utr5
NM_001002113	71	101	utr5
NM_001002113	71	101	cds
NM_001002113	102	131	cds
NM_001002113	121	151	cds
NM_001002113	152	181	cds
NM_001002113	221	249	cds
NM_001002113	301	331	cds
NM_001002113	332	361	cds
NM_001002113	371	401	cds
NM_001002113	411	439	cds
NM_001002113	521	551	cds
NM_001002113	571	601	cds
NM_001002113	602	631	cds
NM_001002113	632	661	cds
NM_001002113	662	691	cds
NM_001002113	731	759	cds
NM_001002113	791	819	cds
NM_001002113	821	849	cds
NM_001002113	901	929	cds
NM_001002113	941	971	cds
NM_001002113	1101	1131	utr3
NM_001002113	1132	1161	utr3
NM_001002113	1162	1191	utr3
NM_001002113	1192	1221	utr3
NM_001002113	1222	1251	utr3
NM_001002113	1252	1281	utr3
NM_001002113	1282	1311	utr3
NM_001002113	1312	1341	utr3
NM_001002113	1342	1371	utr3
NM_001002113	1391	1421	utr3
NM_001002113	1422	1451	utr3
NM_001002113	1452	1481	utr3
NM_001002113	1482	1511	utr3
NM_001002113	1512	1541	utr3
NM_001002113	1561	1589	utr3
NM_001002113	1631	1661	utr3
NM_001002113	1671	1699	utr3
NM_001002113	1701	1731	utr3
NM_001002113	1732	1761	utr3
NM_001002113	1762	1791	utr3
NM_001002113	1791	1821	utr3
NM_001002113	1841	1869	utr3
NM_001002113	1871	1901	utr3
NM_001002113	1902	1931	utr3
NM_001002115	81	111	cds
NM_001002115	121	149	cds
NM_001002115	201	229	cds
NM_001002115	511	541	cds
NM_001002115	581	609	cds
NM_001002115	641	669	cds
NM_001002115	721	749	cds
NM_001002115	821	849	utr3
NM_001002115	821	849	cds
NM_001002115	891	921	utr3
NM_001002115	922	951	utr3
NM_001002115	991	1019	utr3
NM_001002115	1061	1089	utr3
NM_001002115	1091	1119	utr3
NM_001002115	1151	1181	utr3
NM_001002115	1182	1211	utr3
NM_001002115	1211	1241	utr3
NM_001002115	1251	1279	utr3
NM_001002115	1301	1331	utr3
NM_001002115	1332	1361	utr3
NM_001002116	21	51	utr5
NM_001002116	52	81	utr5
NM_001002116	151	179	cds
NM_001002116	311	339	cds
NM_001002116	401	431	cds
NM_001002116	571	601	cds
NM_001002116	602	631	cds
NM_001002116	741	771	cds
NM_001002116	772	801	cds
NM_001002116	802	831	cds
NM_001002116	832	861	cds
NM_001002116	862	891	cds
NM_001002116	981	1011	cds
NM_001002116	1012	1041	cds
NM_001002116	1042	1071	cds
NM_001002116	1191	1221	utr3
NM_001002116	1191	1221	cds
NM_001002116	1222	1251	utr3
NM_001002116	1271	1301	utr3
NM_001002116	1302	1331	utr3
NM_001002116	1391	1421	utr3
NM_001002116	1521	1549	utr3
NM_001002116	1581	1609	utr3
NM_001002118	81	109	utr5
NM_001002118	131	159	utr5
NM_001002118	231	259	cds
NM_001002118	531	561	cds
NM_001002118	621	651	cds
NM_001002118	771	799	utr3
NM_001002118	831	859	utr3
NM_001002119	401	429	cds
NM_001002119	511	541	cds
NM_001002120	31	59	utr5
NM_001002120	61	89	utr5
NM_001002120	91	119	utr5
NM_001002120	261	289	cds
NM_001002120	311	341	cds
NM_001002120	361	389	cds
NM_001002120	421	449	cds
NM_001002120	821	849	cds
NM_001002120	961	989	cds
NM_001002120	1041	1069	cds
NM_001002120	1191	1221	cds
NM_001002120	1222	1251	cds
NM_001002120	1251	1279	cds
NM_001002120	1331	1361	cds
NM_001002120	1362	1391	cds
NM_001002120	1392	1421	cds
NM_001002120	1581	1611	cds
NM_001002120	1612	1641	cds
NM_001002120	1642	1671	cds
NM_001002120	1691	1719	cds
NM_001002120	1721	1751	cds
NM_001002120	1752	1781	cds
NM_001002120	1782	1811	cds
NM_001002120	1831	1859	cds
NM_001002120	1861	1889	cds
NM_001002120	1901	1929	cds
NM_001002120	1941	1969	utr3
NM_001002120	1941	1969	cds
NM_001002120	1971	1999	utr3
NM_001002120	2031	2059	utr3
NM_001002121	21	51	utr5
NM_001002121	52	81	utr5
NM_001002121	171	201	cds
NM_001002121	202	231	cds
NM_001002121	232	261	cds
NM_001002121	361	391	cds
NM_001002121	392	421	cds
NM_001002121	422	451	cds
NM_001002121	521	551	cds
NM_001002121	552	581	cds
NM_001002121	601	631	cds
NM_001002121	632	661	cds
NM_001002121	662	691	cds
NM_001002121	751	781	cds
NM_001002121	782	811	cds
NM_001002121	821	849	cds
NM_001002121	931	961	cds
NM_001002121	962	991	cds
NM_001002121	1081	1109	cds
NM_001002121	1111	1139	cds
NM_001002121	1141	1171	cds
NM_001002121	1172	1201	cds
NM_001002121	1202	1231	cds
NM_001002121	1281	1311	cds
NM_001002121	1312	1341	cds
NM_001002121	1342	1371	cds
NM_001002121	1381	1409	cds
NM_001002121	1441	1471	cds
NM_001002121	1472	1501	cds
NM_001002121	1502	1531	cds
NM_001002121	1532	1561	cds
NM_001002121	1551	1581	cds
NM_001002121	1582	1611	cds
NM_001002121	1631	1659	utr3
NM_001002121	1661	1691	utr3
NM_001002121	1692	1721	utr3
NM_001002121	1722	1751	utr3
NM_001002121	1752	1781	utr3
NM_001002121	1771	1801	utr3
NM_001002121	1802	1831	utr3
NM_001002121	1832	1861	utr3
NM_001002121	1862	1891	utr3
NM_001002121	1901	1931	utr3
NM_001002121	1932	1961	utr3
NM_001002121	1962	1991	utr3
NM_001002121	1992	2021	utr3
NM_001002123	191	219	cds
NM_001002123	321	349	cds
NM_001002123	381	409	cds
NM_001002123	421	451	cds
NM_001002123	452	481	cds
NM_001002123	511	541	cds
NM_001002123	542	571	cds
NM_001002123	601	631	cds
NM_001002123	632	661	cds
NM_001002127	41	71	utr5
NM_001002127	72	101	utr5
NM_001002127	111	139	utr5
NM_001002127	201	231	cds
NM_001002127	232	261	cds
NM_001002127	262	291	cds
NM_001002127	311	339	cds
NM_001002127	361	391	cds
NM_001002127	392	421	cds
NM_001002127	531	561	cds
NM_001002127	611	641	cds
NM_001002127	642	671	cds
NM_001002127	672	701	cds
NM_001002127	702	731	cds
NM_001002127	741	771	cds
NM_001002127	801	829	cds
NM_001002127	901	929	cds
NM_001002127	931	961	utr3
NM_001002127	931	961	cds
NM_001002127	1001	1031	utr3
NM_001002127	1032	1061	utr3
NM_001002127	1091	1121	utr3
NM_001002127	1122	1151	utr3
NM_001002127	1191	1219	utr3
NM_001002127	1221	1249	utr3
NM_001002128	41	71	utr5
NM_001002128	41	71	cds
NM_001002128	72	101	cds
NM_001002128	102	131	cds
NM_001002128	131	159	cds
NM_001002128	161	189	cds
NM_001002128	191	219	cds
NM_001002128	241	269	cds
NM_001002128	411	439	cds
NM_001002128	511	541	cds
NM_001002128	542	571	cds
NM_001002128	572	601	cds
NM_001002128	602	631	cds
NM_001002128	632	661	cds
NM_001002128	662	691	cds
NM_001002128	731	759	cds
NM_001002128	781	809	cds
NM_001002128	811	841	cds
NM_001002128	842	871	cds
NM_001002128	861	891	cds
NM_001002128	892	921	cds
NM_001002128	971	1001	cds
NM_001002128	1002	1031	cds
NM_001002128	1021	1049	cds
NM_001002128	1081	1111	cds
NM_001002128	1112	1141	cds
NM_001002128	1171	1199	cds
NM_001002128	1261	1291	cds
NM_001002128	1292	1321	cds
NM_001002128	1322	1351	utr3
NM_001002128	1322	1351	cds
NM_001002128	1451	1481	utr3
NM_001002128	1482	1511	utr3
NM_001002128	1512	1541	utr3
NM_001002128	1542	1571	utr3
NM_001002128	1581	1611	utr3
NM_001002128	1612	1641	utr3
NM_001002129	571	601	cds
NM_001002130	821	849	utr3
NM_001002130	931	959	utr3
NM_001002130	1141	1171	utr3
NM_001002130	1172	1201	utr3
NM_001002130	1221	1251	utr3
NM_001002130	1321	1349	utr3
NM_001002130	1391	1421	utr3
NM_001002130	1431	1461	utr3
NM_001002130	1462	1491	utr3
NM_001002130	1521	1549	utr3
NM_001002130	1701	1729	utr3
NM_001002130	1761	1789	utr3
NM_001002130	1881	1911	utr3
NM_001002130	1912	1941	utr3
NM_001002130	1941	1969	utr3
NM_001002131	41	71	utr5
NM_001002131	41	71	cds
NM_001002131	72	101	cds
NM_001002131	102	131	cds
NM_001002131	132	161	cds
NM_001002131	151	179	cds
NM_001002131	241	271	cds
NM_001002131	272	301	cds
NM_001002131	321	351	cds
NM_001002131	352	381	cds
NM_001002131	391	421	cds
NM_001002131	422	451	cds
NM_001002131	452	481	cds
NM_001002131	482	511	cds
NM_001002131	511	539	cds
NM_001002131	561	589	cds
NM_001002131	591	621	cds
NM_001002131	622	651	cds
NM_001002131	651	681	cds
NM_001002131	682	711	cds
NM_001002131	731	759	cds
NM_001002131	771	799	cds
NM_001002131	831	861	utr3
NM_001002131	831	861	cds
NM_001002131	862	891	utr3
NM_001002131	911	941	utr3
NM_001002131	1031	1061	utr3
NM_001002131	1062	1091	utr3
NM_001002131	1092	1121	utr3
NM_001002131	1171	1199	utr3
NM_001002131	1371	1399	utr3
NM_001002132	171	199	utr5
NM_001002137	211	239	cds
NM_001002137	251	279	cds
NM_001002137	311	339	cds
NM_001002137	351	379	cds
NM_001002137	381	411	cds
NM_001002137	412	441	cds
NM_001002137	501	529	cds
NM_001002137	531	559	cds
NM_001002137	571	601	utr3
NM_001002137	571	601	cds
NM_001002137	602	631	utr3
NM_001002137	632	661	utr3
NM_001002137	701	729	utr3
NM_001002137	761	791	utr3
NM_001002137	792	821	utr3
NM_001002137	831	859	utr3
NM_001002137	881	911	utr3
NM_001002137	921	951	utr3
NM_001002137	952	981	utr3
NM_001002139	1	29	utr5
NM_001002139	1	29	cds
NM_001002139	31	61	cds
NM_001002139	62	91	cds
NM_001002139	92	121	cds
NM_001002139	122	151	cds
NM_001002139	171	201	cds
NM_001002139	202	231	cds
NM_001002139	241	271	cds
NM_001002139	272	301	cds
NM_001002139	341	371	cds
NM_001002139	372	401	cds
NM_001002139	402	431	cds
NM_001002139	531	561	utr3
NM_001002139	531	561	cds
NM_001002139	562	591	utr3
NM_001002144	61	89	cds
NM_001002144	101	131	cds
NM_001002144	132	161	cds
NM_001002144	311	339	cds
NM_001002144	401	429	cds
NM_001002144	551	579	utr3
NM_001002144	601	629	utr3
NM_001002144	651	679	utr3
NM_001002144	751	781	utr3
NM_001002144	782	811	utr3
NM_001002144	812	841	utr3
NM_001002144	861	889	utr3
NM_001002145	191	219	utr5
NM_001002145	191	219	cds
NM_001002145	271	299	cds
NM_001002145	711	741	cds
NM_001002145	742	771	cds
NM_001002145	901	929	cds
NM_001002145	971	1001	cds
NM_001002145	1002	1031	cds
NM_001002145	1061	1091	cds
NM_001002145	1171	1201	cds
NM_001002145	1451	1479	utr3
NM_001002145	1551	1579	utr3
NM_001002145	1601	1629	utr3
NM_001002147	11	41	utr5
NM_001002147	11	41	cds
NM_001002147	171	199	cds
NM_001002147	291	319	cds
NM_001002147	391	419	utr3
NM_001002147	391	419	cds
NM_001002147	511	539	utr3
NM_001002147	591	621	utr3
NM_001002147	622	651	utr3
NM_001002147	652	681	utr3
NM_001002147	851	881	utr3
NM_001002147	882	911	utr3
NM_001002147	941	969	utr3
NM_001002151	981	1011	cds
NM_001002151	1012	1041	cds
NM_001002151	1141	1171	utr3
NM_001002151	1261	1291	utr3
NM_001002151	1292	1321	utr3
NM_001002151	1461	1489	utr3
NM_001002151	1491	1519	utr3
NM_001002151	1581	1609	utr3
NM_001002151	1691	1719	utr3
NM_001002151	1781	1809	utr3
NM_001002151	1941	1969	utr3
NM_001002151	1971	2001	utr3
NM_001002151	2002	2031	utr3
NM_001002152	131	159	cds
NM_001002152	201	231	cds
NM_001002152	232	261	cds
NM_001002152	291	319	cds
NM_001002152	321	349	cds
NM_001002152	391	421	cds
NM_001002152	422	451	cds
NM_001002152	452	481	cds
NM_001002152	482	511	cds
NM_001002152	521	549	cds
NM_001002152	571	599	cds
NM_001002152	641	669	utr3
NM_001002152	641	669	cds
NM_001002152	731	761	utr3
NM_001002152	762	791	utr3
NM_001002152	792	821	utr3
NM_001002152	831	859	utr3
NM_001002152	881	909	utr3
NM_001002152	931	959	utr3
NM_001002152	1011	1041	utr3
NM_001002152	1042	1071	utr3
NM_001002152	1072	1101	utr3
NM_001002152	1102	1131	utr3
NM_001002152	1132	1161	utr3
NM_001002152	1162	1191	utr3
NM_001002152	1192	1221	utr3
NM_001002152	1222	1251	utr3
NM_001002152	1252	1281	utr3
NM_001002152	1281	1311	utr3
NM_001002152	1312	1341	utr3
NM_001002152	1342	1371	utr3
NM_001002152	1372	1401	utr3
[truncated: 145,035 more rows]

## Sheet: 1hpf->2hpf
TransID	start(0-based)	end(0-based)	region
NM_001001399	161	189	cds
NM_001001399	251	281	cds
NM_001001399	701	731	utr3
NM_001001399	732	761	utr3
NM_001001399	851	881	utr3
NM_001001399	891	919	utr3
NM_001001399	931	961	utr3
NM_001001399	962	991	utr3
NM_001001400	2031	2061	utr3
NM_001001401	2201	2229	cds
NM_001001401	2291	2319	cds
NM_001001401	2331	2359	cds
NM_001001401	2441	2469	utr3
NM_001001401	2471	2499	utr3
NM_001001401	2551	2581	utr3
NM_001001401	2621	2649	utr3
NM_001001401	2751	2779	utr3
NM_001001402	631	659	cds
NM_001001402	1971	1999	utr3
NM_001001402	2061	2091	utr3
NM_001001402	2092	2121	utr3
NM_001001402	2131	2159	utr3
NM_001001402	2171	2201	utr3
NM_001001402	2421	2449	utr3
NM_001001402	2501	2529	utr3
NM_001001402	2611	2639	utr3
NM_001001402	2661	2691	utr3
NM_001001402	2692	2721	utr3
NM_001001402	2881	2911	utr3
NM_001001402	3091	3121	utr3
NM_001001402	3122	3151	utr3
NM_001001402	3152	3181	utr3
NM_001001402	3241	3269	utr3
NM_001001589	91	119	cds
NM_001001589	211	239	cds
NM_001001589	311	339	cds
NM_001001589	371	399	cds
NM_001001589	501	529	cds
NM_001001589	701	729	cds
NM_001001589	741	769	cds
NM_001001589	771	801	cds
NM_001001589	802	831	cds
NM_001001589	831	859	cds
NM_001001589	921	951	cds
NM_001001589	952	981	cds
NM_001001589	1021	1049	cds
NM_001001589	1121	1151	cds
NM_001001589	1152	1181	cds
NM_001001589	1261	1289	cds
NM_001001589	1301	1329	cds
NM_001001589	1401	1429	utr3
NM_001001589	1401	1429	cds
NM_001001589	1501	1529	utr3
NM_001001589	1571	1601	utr3
NM_001001589	1602	1631	utr3
NM_001001590	121	151	cds
NM_001001590	152	181	cds
NM_001001590	171	201	cds
NM_001001590	202	231	cds
NM_001001590	301	331	cds
NM_001001590	332	361	cds
NM_001001590	381	409	cds
NM_001001590	511	539	cds
NM_001001590	591	621	cds
NM_001001590	622	651	cds
NM_001001590	671	699	cds
NM_001001590	731	759	cds
NM_001001590	881	909	cds
NM_001001590	941	971	cds
NM_001001590	972	1001	cds
NM_001001590	1001	1031	cds
NM_001001590	1032	1061	cds
NM_001001590	1091	1121	cds
NM_001001590	1141	1171	cds
NM_001001590	1201	1229	cds
NM_001001590	1251	1281	cds
NM_001001590	1282	1311	utr3
NM_001001590	1282	1311	cds
NM_001001591	1451	1479	cds
NM_001001591	1961	1989	cds
NM_001001593	171	201	cds
NM_001001593	202	231	cds
NM_001001593	381	409	cds
NM_001001593	411	439	cds
NM_001001724	51	79	utr5
NM_001001724	141	169	utr5
NM_001001724	141	169	cds
NM_001001724	171	199	cds
NM_001001724	211	241	cds
NM_001001724	242	271	cds
NM_001001724	301	329	cds
NM_001001724	471	499	cds
NM_001001724	501	529	cds
NM_001001724	681	709	utr3
NM_001001724	801	831	utr3
NM_001001724	861	889	utr3
NM_001001724	901	929	utr3
NM_001001724	1001	1029	utr3
NM_001001729	421	449	cds
NM_001001729	711	739	cds
NM_001001729	791	821	utr3
NM_001001729	791	821	cds
NM_001001729	831	859	utr3
NM_001001729	881	909	utr3
NM_001001729	951	979	utr3
NM_001001729	1391	1419	utr3
NM_001001729	1521	1549	utr3
NM_001001729	1661	1691	utr3
NM_001001729	2001	2029	utr3
NM_001001729	2051	2079	utr3
NM_001001729	2111	2139	utr3
NM_001001729	2241	2271	utr3
NM_001001729	2272	2301	utr3
NM_001001813	41	69	utr5
NM_001001813	81	109	utr5
NM_001001813	81	109	cds
NM_001001813	151	179	cds
NM_001001813	241	271	cds
NM_001001813	471	499	cds
NM_001001813	601	631	cds
NM_001001813	632	661	cds
NM_001001813	861	889	utr3
NM_001001813	921	949	utr3
NM_001001813	951	979	utr3
NM_001001813	991	1019	utr3
NM_001001813	1061	1089	utr3
NM_001001813	1151	1181	utr3
NM_001001813	1191	1221	utr3
NM_001001813	1222	1251	utr3
NM_001001818	321	349	utr5
NM_001001818	391	419	utr5
NM_001001818	431	459	utr5
NM_001001818	481	509	utr5
NM_001001818	511	541	utr5
NM_001001818	511	541	cds
NM_001001818	542	571	cds
NM_001001818	581	611	cds
NM_001001818	612	641	cds
NM_001001818	721	751	cds
NM_001001818	752	781	cds
NM_001001818	811	841	cds
NM_001001818	842	871	cds
NM_001001818	872	901	cds
NM_001001818	1001	1029	cds
NM_001001818	1031	1061	cds
NM_001001818	1062	1091	cds
NM_001001818	1121	1149	cds
NM_001001818	1271	1301	cds
NM_001001818	1302	1331	cds
NM_001001818	1332	1361	cds
NM_001001818	1431	1461	cds
NM_001001818	1491	1519	cds
NM_001001818	1521	1551	cds
NM_001001818	1591	1621	utr3
NM_001001818	1591	1621	cds
NM_001001818	1631	1661	utr3
NM_001001818	1671	1699	utr3
NM_001001818	1791	1819	utr3
NM_001001818	1831	1859	utr3
NM_001001818	1961	1989	utr3
NM_001001818	2051	2079	utr3
NM_001001818	2151	2181	utr3
NM_001001818	2182	2211	utr3
NM_001001818	2221	2249	utr3
NM_001001818	2341	2371	utr3
NM_001001818	2381	2409	utr3
NM_001001818	2411	2439	utr3
NM_001001818	2451	2479	utr3
NM_001001818	2491	2519	utr3
NM_001001819	61	89	cds
NM_001001819	151	181	cds
NM_001001822	21	49	utr5
NM_001001822	251	279	utr5
NM_001001822	301	331	utr5
NM_001001822	341	369	utr5
NM_001001822	501	531	utr5
NM_001001822	532	561	utr5
NM_001001822	701	729	cds
NM_001001822	731	759	cds
NM_001001822	851	879	cds
NM_001001822	1051	1079	cds
NM_001001822	1081	1109	cds
NM_001001822	1111	1141	cds
NM_001001822	1142	1171	cds
NM_001001822	1261	1291	cds
NM_001001822	1292	1321	cds
NM_001001822	1322	1351	cds
NM_001001822	1352	1381	cds
NM_001001822	1451	1479	cds
NM_001001822	1481	1511	cds
NM_001001822	1512	1541	cds
NM_001001822	1651	1681	cds
NM_001001822	1682	1711	cds
NM_001001822	1701	1729	cds
NM_001001822	1741	1771	cds
NM_001001822	1791	1819	utr3
NM_001001822	1791	1819	cds
NM_001001822	1901	1929	utr3
NM_001001822	1971	1999	utr3
NM_001001822	2041	2069	utr3
NM_001001822	2091	2119	utr3
NM_001001822	2271	2301	utr3
NM_001001822	2331	2359	utr3
NM_001001822	2391	2419	utr3
NM_001001822	2421	2451	utr3
NM_001001822	2471	2499	utr3
NM_001001822	2511	2539	utr3
NM_001001823	31	59	utr5
NM_001001823	71	99	utr5
NM_001001823	141	171	cds
NM_001001823	172	201	cds
NM_001001823	451	479	cds
NM_001001823	661	689	cds
NM_001001823	741	769	cds
NM_001001823	1601	1629	cds
NM_001001823	1741	1769	cds
NM_001001823	2231	2259	cds
NM_001001823	2341	2369	utr3
NM_001001823	2411	2439	utr3
NM_001001828	601	629	cds
NM_001001828	661	691	cds
NM_001001828	692	721	cds
NM_001001828	771	799	cds
NM_001001828	851	879	cds
NM_001001828	891	919	cds
NM_001001828	1101	1129	cds
NM_001001830	81	111	utr5
NM_001001830	201	229	utr5
NM_001001830	281	309	utr5
NM_001001830	331	361	utr5
NM_001001830	491	521	utr5
NM_001001830	491	521	cds
NM_001001830	522	551	cds
NM_001001830	581	611	cds
NM_001001830	612	641	cds
NM_001001830	721	749	cds
NM_001001830	841	869	cds
NM_001001830	891	919	cds
NM_001001830	961	989	cds
NM_001001830	1061	1089	cds
NM_001001830	1121	1149	cds
NM_001001830	1301	1329	cds
NM_001001830	1461	1489	cds
NM_001001830	1561	1589	utr3
NM_001001830	1561	1589	cds
NM_001001830	1711	1739	utr3
NM_001001830	1771	1799	utr3
NM_001001830	1871	1901	utr3
NM_001001830	1902	1931	utr3
NM_001001830	1951	1979	utr3
NM_001001830	2001	2029	utr3
NM_001001830	2041	2071	utr3
NM_001001830	2101	2129	utr3
NM_001001830	2161	2189	utr3
NM_001001830	2261	2289	utr3
NM_001001830	2371	2399	utr3
NM_001001830	2601	2629	utr3
NM_001001830	2811	2839	utr3
NM_001001830	2921	2949	utr3
NM_001001830	2971	2999	utr3
NM_001001830	3201	3229	utr3
NM_001001830	3431	3459	utr3
NM_001001830	3551	3581	utr3
NM_001001830	3582	3611	utr3
NM_001001830	3651	3679	utr3
NM_001001832	841	869	cds
NM_001001832	1381	1409	utr3
NM_001001834	1901	1929	utr3
NM_001001836	1761	1789	utr3
NM_001001840	791	819	cds
NM_001001840	881	909	cds
NM_001001840	991	1019	cds
NM_001001840	1091	1119	cds
NM_001001840	1471	1501	cds
NM_001001840	1731	1761	cds
NM_001001840	1941	1971	cds
NM_001001840	1972	2001	cds
NM_001001840	2021	2051	cds
NM_001001840	2052	2081	cds
NM_001001840	2071	2099	cds
NM_001001840	2101	2129	cds
NM_001001840	2131	2159	cds
NM_001001840	2311	2339	cds
NM_001001840	2351	2379	cds
NM_001001840	2411	2441	cds
NM_001001840	2442	2471	cds
NM_001001840	2991	3019	utr3
NM_001001840	3141	3169	utr3
NM_001001840	3261	3291	utr3
NM_001001840	3311	3341	utr3
NM_001001840	3401	3429	utr3
NM_001001844	431	459	cds
NM_001001844	901	929	cds
NM_001001844	971	1001	cds
NM_001001844	1002	1031	cds
NM_001001844	1131	1159	cds
NM_001001844	1601	1631	cds
NM_001001844	1632	1661	cds
NM_001001844	1761	1789	cds
NM_001001844	1801	1829	cds
NM_001001844	2031	2061	cds
NM_001001844	2131	2159	cds
NM_001001844	2281	2309	cds
NM_001001844	2371	2401	cds
NM_001001844	2402	2431	cds
NM_001001844	2461	2489	cds
NM_001001844	2551	2579	utr3
NM_001001844	2701	2729	utr3
NM_001001844	2861	2889	utr3
NM_001001844	3041	3069	utr3
NM_001001844	3131	3161	utr3
NM_001001844	3162	3191	utr3
NM_001001844	3201	3229	utr3
NM_001001844	3251	3281	utr3
NM_001001844	3282	3311	utr3
NM_001001844	3312	3341	utr3
NM_001001844	3391	3421	utr3
NM_001001844	3511	3539	utr3
NM_001001844	3691	3719	utr3
NM_001001844	3721	3751	utr3
NM_001001844	3752	3781	utr3
NM_001001844	3771	3801	utr3
NM_001001844	3802	3831	utr3
NM_001001844	3881	3911	utr3
NM_001001844	3912	3941	utr3
NM_001001844	4031	4061	utr3
NM_001001844	4062	4091	utr3
NM_001001844	4092	4121	utr3
NM_001001886	411	439	cds
NM_001001886	611	641	cds
NM_001001886	861	889	cds
NM_001001886	961	989	cds
NM_001001886	1231	1259	cds
NM_001001886	1361	1391	cds
NM_001001886	1691	1719	cds
NM_001001886	2071	2099	cds
NM_001001886	2281	2309	cds
NM_001001886	2311	2341	cds
NM_001001886	2342	2371	cds
NM_001001886	2651	2679	cds
NM_001001886	2751	2779	cds
NM_001001886	2891	2919	cds
NM_001001886	2951	2981	cds
NM_001001886	2982	3011	cds
NM_001001886	3071	3099	cds
NM_001001886	3331	3359	cds
NM_001001886	3361	3391	utr3
NM_001001886	3361	3391	cds
NM_001001886	3392	3421	utr3
NM_001001886	3491	3521	utr3
NM_001001886	3561	3591	utr3
NM_001001886	3592	3621	utr3
NM_001001886	3641	3669	utr3
NM_001001886	3721	3751	utr3
NM_001001886	3811	3839	utr3
NM_001001886	3861	3889	utr3
NM_001001886	3921	3949	utr3
NM_001001889	21	49	utr5
NM_001001889	91	119	utr5
NM_001001889	151	181	utr5
NM_001001889	151	181	cds
NM_001001889	182	211	cds
NM_001001889	212	241	cds
NM_001001889	242	271	cds
NM_001001889	361	391	cds
NM_001001889	392	421	cds
NM_001001889	421	449	cds
NM_001001889	451	481	cds
NM_001001889	482	511	cds
NM_001001889	601	629	cds
NM_001001889	691	719	cds
NM_001001889	901	929	cds
NM_001001889	961	991	cds
NM_001001889	1041	1069	cds
NM_001001889	1081	1109	cds
NM_001001889	1131	1161	cds
NM_001001889	1181	1211	cds
NM_001001889	1212	1241	cds
NM_001001889	1251	1279	cds
NM_001001889	1281	1311	cds
NM_001001889	1312	1341	cds
NM_001001889	1342	1371	cds
NM_001001889	1372	1401	cds
NM_001001889	1481	1511	cds
NM_001001889	1512	1541	cds
NM_001001889	1591	1619	cds
NM_001001889	1661	1691	cds
NM_001001889	1692	1721	cds
NM_001001889	1722	1751	cds
NM_001001889	1752	1781	cds
NM_001001889	1782	1811	cds
NM_001001889	1811	1841	cds
NM_001001889	1842	1871	cds
NM_001001889	1931	1961	cds
NM_001001889	1962	1991	cds
NM_001001889	2011	2039	cds
NM_001001889	2041	2071	cds
NM_001001889	2081	2109	cds
NM_001001889	2141	2171	cds
NM_001001889	2172	2201	cds
NM_001001889	2202	2231	cds
NM_001001889	2281	2311	cds
NM_001001940	161	189	cds
NM_001001940	561	589	cds
NM_001001940	671	699	cds
NM_001001940	891	919	cds
NM_001001940	1121	1149	cds
NM_001001940	1171	1201	cds
NM_001001940	1351	1379	cds
NM_001001940	1381	1409	cds
NM_001001940	1511	1539	cds
NM_001001940	1721	1749	cds
NM_001001940	1861	1889	cds
NM_001001940	1891	1919	cds
NM_001001940	1951	1981	cds
NM_001001940	1982	2011	cds
NM_001001940	2031	2059	cds
NM_001001940	2141	2169	cds
NM_001001940	2201	2229	cds
NM_001001940	2361	2389	cds
NM_001001940	2451	2481	cds
NM_001001940	2482	2511	cds
NM_001001940	2512	2541	cds
NM_001001940	2631	2659	cds
NM_001001940	2681	2709	cds
NM_001001940	2831	2861	cds
NM_001001940	2862	2891	utr3
NM_001001940	2862	2891	cds
NM_001001940	2892	2921	utr3
NM_001001940	2981	3011	utr3
NM_001001940	3012	3041	utr3
NM_001001940	3041	3071	utr3
NM_001001940	3072	3101	utr3
NM_001001941	191	219	cds
NM_001001941	491	519	cds
NM_001001941	661	689	cds
NM_001001941	791	819	cds
NM_001001941	1031	1061	cds
NM_001001941	1181	1211	cds
NM_001001941	1331	1359	cds
NM_001001941	1381	1409	cds
NM_001001941	1511	1539	cds
NM_001001941	1691	1719	cds
NM_001001941	1811	1841	cds
NM_001001941	1891	1919	cds
NM_001001941	1951	1979	cds
NM_001001941	2031	2059	cds
NM_001001941	2151	2179	cds
NM_001001941	2201	2231	cds
NM_001001941	2232	2261	cds
NM_001001941	2581	2611	cds
NM_001001941	2612	2641	cds
NM_001001941	3021	3051	cds
NM_001001941	3052	3081	cds
NM_001001941	3071	3101	cds
NM_001001941	3102	3131	cds
NM_001001941	3132	3161	cds
NM_001001941	3151	3179	cds
NM_001001941	3251	3279	cds
NM_001001941	3661	3691	cds
NM_001001941	3701	3731	cds
NM_001001941	3732	3761	cds
NM_001001941	3771	3801	utr3
NM_001001941	3771	3801	cds
NM_001001941	3811	3841	utr3
NM_001001941	3842	3871	utr3
NM_001001941	3872	3901	utr3
NM_001001941	3921	3951	utr3
NM_001001941	3952	3981	utr3
NM_001001941	3991	4019	utr3
NM_001001941	4021	4051	utr3
NM_001001943	71	99	utr5
NM_001001943	1621	1649	cds
NM_001001943	1661	1691	cds
NM_001001943	1701	1731	cds
NM_001001943	1732	1761	cds
NM_001001943	1971	1999	cds
NM_001001943	2011	2039	cds
NM_001001943	2101	2131	cds
NM_001001943	2132	2161	cds
NM_001001943	2151	2179	cds
NM_001001943	2191	2219	cds
NM_001001943	2301	2329	cds
NM_001001943	2381	2409	utr3
NM_001001943	2441	2471	utr3
NM_001001943	2481	2509	utr3
NM_001001943	2511	2541	utr3
NM_001001943	2601	2631	utr3
NM_001001943	2632	2661	utr3
NM_001001943	2981	3009	utr3
NM_001001943	3021	3051	utr3
NM_001001943	3052	3081	utr3
NM_001001943	3071	3099	utr3
NM_001001943	3121	3151	utr3
NM_001001943	3331	3359	utr3
NM_001001943	3431	3459	utr3
NM_001001943	3461	3491	utr3
NM_001001943	3492	3521	utr3
NM_001001943	3522	3551	utr3
NM_001001943	3581	3609	utr3
NM_001001943	3701	3729	utr3
NM_001001943	3731	3761	utr3
NM_001001943	3891	3921	utr3
NM_001001943	3922	3951	utr3
NM_001001943	3941	3969	utr3
NM_001001943	4011	4039	utr3
NM_001001943	4091	4121	utr3
NM_001001943	4122	4151	utr3
NM_001001943	4141	4169	utr3
NM_001001943	4171	4201	utr3
NM_001001943	4331	4359	utr3
NM_001001944	91	121	utr5
NM_001001944	231	259	cds
NM_001001944	261	289	cds
NM_001001944	311	339	cds
NM_001001944	381	409	cds
NM_001001944	421	449	cds
NM_001001944	481	509	cds
NM_001001944	531	561	cds
NM_001001944	562	591	cds
NM_001001944	591	621	cds
NM_001001944	721	749	cds
NM_001001944	881	911	cds
NM_001001944	1001	1029	cds
NM_001001944	1051	1079	cds
NM_001001944	1241	1269	cds
NM_001001944	1371	1401	cds
NM_001001944	1402	1431	cds
NM_001001944	1481	1511	cds
NM_001001944	1531	1561	cds
NM_001001944	1562	1591	cds
NM_001001944	1591	1619	cds
NM_001001944	1641	1669	cds
NM_001001944	1681	1711	cds
NM_001001944	1712	1741	cds
NM_001001944	1742	1771	cds
NM_001001944	1801	1831	cds
NM_001001944	1832	1861	cds
NM_001001944	1871	1899	cds
NM_001001944	1981	2011	cds
NM_001001944	2012	2041	cds
NM_001001944	2042	2071	cds
NM_001001944	2181	2211	cds
NM_001001944	2212	2241	cds
NM_001001944	2411	2439	cds
NM_001001944	2511	2541	cds
NM_001001944	2542	2571	cds
NM_001001944	2561	2591	cds
NM_001001944	2592	2621	cds
NM_001001944	2821	2849	cds
NM_001001944	2891	2921	cds
NM_001001944	2922	2951	cds
NM_001001944	2952	2981	cds
NM_001001944	3001	3031	cds
NM_001001944	3032	3061	utr3
NM_001001944	3032	3061	cds
NM_001001944	3141	3169	utr3
NM_001001944	3171	3199	utr3
NM_001001944	3251	3281	utr3
NM_001001944	3282	3311	utr3
NM_001001944	3331	3359	utr3
NM_001001944	3401	3429	utr3
NM_001001944	3441	3469	utr3
NM_001001944	3621	3651	utr3
NM_001001944	3652	3681	utr3
NM_001001944	3701	3729	utr3
NM_001001944	3751	3781	utr3
NM_001001944	3782	3811	utr3
NM_001001944	3871	3899	utr3
NM_001001944	3901	3931	utr3
NM_001001944	3932	3961	utr3
NM_001001944	3962	3991	utr3
NM_001001948	71	99	cds
NM_001001948	191	221	cds
NM_001001948	222	251	cds
NM_001001948	252	281	cds
NM_001001948	311	339	cds
NM_001001948	351	381	cds
NM_001001948	391	419	cds
NM_001001948	431	461	cds
NM_001001948	581	611	cds
NM_001001948	691	721	cds
NM_001001948	761	791	cds
NM_001001948	811	839	cds
NM_001001948	921	951	cds
NM_001001948	952	981	cds
NM_001001948	1011	1039	cds
NM_001001948	1101	1131	cds
NM_001001948	1132	1161	cds
NM_001001948	1151	1179	cds
NM_001001948	1281	1309	cds
NM_001001948	1311	1341	cds
NM_001001948	1342	1371	cds
NM_001001948	1411	1441	cds
NM_001001948	1442	1471	cds
NM_001001948	1481	1511	cds
NM_001001948	1521	1549	cds
NM_001001951	501	529	cds
NM_001001951	931	959	cds
NM_001001951	961	991	cds
NM_001001951	1741	1769	utr3
NM_001001951	1851	1881	utr3
NM_001001951	1882	1911	utr3
NM_001001951	1961	1991	utr3
NM_001001951	2011	2039	utr3
NM_001001951	2061	2089	utr3
NM_001002013	21	49	utr5
NM_001002013	211	239	cds
NM_001002013	461	489	cds
NM_001002013	501	531	cds
NM_001002013	561	589	cds
NM_001002013	621	649	cds
NM_001002013	1121	1151	cds
NM_001002013	1152	1181	cds
NM_001002013	1191	1221	cds
NM_001002013	1222	1251	cds
NM_001002013	1311	1339	cds
NM_001002013	1381	1409	cds
NM_001002013	1501	1529	cds
NM_001002013	1801	1829	cds
NM_001002013	1831	1859	cds
NM_001002013	1901	1929	cds
NM_001002013	2161	2191	cds
NM_001002013	2201	2229	cds
NM_001002013	2501	2529	cds
NM_001002013	2581	2609	cds
NM_001002013	2611	2641	cds
NM_001002013	2642	2671	cds
NM_001002013	2711	2741	cds
NM_001002013	2742	2771	cds
NM_001002013	2761	2791	cds
NM_001002013	2841	2869	cds
NM_001002013	2881	2911	cds
NM_001002013	2912	2941	cds
NM_001002013	2951	2981	utr3
NM_001002013	2951	2981	cds
NM_001002013	3021	3049	utr3
NM_001002013	3121	3149	utr3
NM_001002013	3181	3211	utr3
NM_001002037	111	139	cds
NM_001002037	231	259	cds
NM_001002037	371	401	cds
NM_001002037	441	469	cds
NM_001002037	661	689	cds
NM_001002037	901	929	cds
NM_001002037	1041	1069	cds
NM_001002037	1081	1109	cds
NM_001002037	1211	1239	cds
NM_001002037	1301	1331	cds
NM_001002037	1332	1361	cds
NM_001002037	1351	1379	cds
NM_001002037	1411	1441	cds
NM_001002037	1442	1471	cds
NM_001002037	1521	1549	cds
NM_001002037	1731	1759	cds
NM_001002037	1781	1809	cds
NM_001002037	1911	1939	cds
NM_001002037	1961	1989	cds
NM_001002041	171	199	cds
NM_001002041	301	329	cds
NM_001002041	361	389	cds
NM_001002041	401	429	cds
NM_001002041	501	529	cds
NM_001002041	531	559	cds
NM_001002041	611	639	cds
NM_001002041	691	719	cds
NM_001002041	801	831	cds
NM_001002041	861	889	cds
NM_001002041	1151	1181	cds
NM_001002041	1221	1249	cds
NM_001002041	1371	1399	cds
NM_001002041	1511	1539	cds
NM_001002041	1621	1649	cds
NM_001002041	1691	1721	cds
NM_001002041	1722	1751	cds
NM_001002041	1801	1831	cds
NM_001002041	2001	2029	cds
NM_001002041	2181	2209	cds
NM_001002041	2321	2351	cds
NM_001002041	2352	2381	cds
NM_001002041	2441	2469	utr3
NM_001002041	2501	2529	utr3
NM_001002042	41	69	cds
NM_001002042	121	149	cds
NM_001002042	501	529	cds
NM_001002042	901	929	cds
NM_001002042	1471	1499	cds
NM_001002042	1811	1839	cds
NM_001002042	1901	1929	cds
NM_001002042	1941	1969	cds
NM_001002042	2071	2099	cds
NM_001002042	2101	2129	cds
NM_001002042	2161	2189	cds
NM_001002042	2241	2269	cds
NM_001002042	2331	2359	cds
NM_001002042	2541	2569	cds
NM_001002042	2711	2739	cds
NM_001002042	2871	2899	cds
NM_001002042	3071	3101	cds
NM_001002042	3102	3131	cds
NM_001002042	3171	3199	cds
NM_001002042	3511	3539	cds
NM_001002042	3631	3659	cds
NM_001002042	3761	3789	cds
NM_001002042	3801	3831	utr3
NM_001002042	3801	3831	cds
NM_001002046	421	449	cds
NM_001002046	471	499	utr3
NM_001002046	701	729	utr3
NM_001002047	321	349	cds
NM_001002047	431	459	cds
NM_001002047	511	539	cds
NM_001002047	611	641	cds
NM_001002047	681	709	cds
NM_001002047	731	759	utr3
NM_001002047	761	789	utr3
NM_001002047	821	849	utr3
NM_001002047	901	929	utr3
NM_001002050	21	51	utr5
NM_001002050	52	81	utr5
NM_001002050	82	111	utr5
NM_001002050	181	211	utr5
NM_001002050	212	241	utr5
NM_001002050	212	241	cds
NM_001002050	242	271	cds
NM_001002050	272	301	cds
NM_001002050	302	331	cds
NM_001002050	511	539	cds
NM_001002050	621	649	cds
NM_001002050	721	751	cds
NM_001002050	752	781	cds
NM_001002050	801	829	cds
NM_001002050	861	891	cds
NM_001002050	892	921	cds
NM_001002050	922	951	cds
NM_001002050	1011	1039	utr3
NM_001002050	1051	1079	utr3
NM_001002051	201	229	cds
NM_001002051	411	439	cds
NM_001002051	921	949	utr3
NM_001002051	921	949	cds
NM_001002051	981	1009	utr3
NM_001002051	1081	1109	utr3
NM_001002051	1181	1209	utr3
NM_001002051	1221	1251	utr3
NM_001002051	1451	1479	utr3
NM_001002053	41	71	utr5
NM_001002053	72	101	utr5
NM_001002053	91	121	utr5
NM_001002053	122	151	utr5
NM_001002053	122	151	cds
NM_001002053	151	181	cds
NM_001002053	182	211	cds
NM_001002053	241	269	cds
NM_001002053	311	339	cds
NM_001002053	371	399	cds
NM_001002053	401	429	cds
NM_001002053	461	491	cds
NM_001002053	492	521	cds
NM_001002053	522	551	cds
NM_001002053	631	661	cds
NM_001002053	662	691	utr3
NM_001002053	662	691	cds
NM_001002053	692	721	utr3
NM_001002053	721	749	utr3
NM_001002053	841	869	utr3
NM_001002053	931	961	utr3
NM_001002055	161	189	cds
NM_001002055	191	221	cds
NM_001002055	222	251	cds
NM_001002055	241	269	cds
NM_001002055	431	459	cds
NM_001002055	601	629	cds
NM_001002055	741	769	cds
NM_001002055	821	849	cds
NM_001002055	851	881	cds
NM_001002055	882	911	cds
NM_001002055	911	939	cds
NM_001002055	1001	1029	cds
NM_001002055	1181	1209	cds
NM_001002055	1561	1589	utr3
NM_001002055	1611	1639	utr3
NM_001002055	1741	1769	utr3
NM_001002055	1831	1859	utr3
NM_001002055	1881	1909	utr3
NM_001002055	1911	1939	utr3
NM_001002056	31	61	utr5
NM_001002056	101	129	cds
NM_001002056	501	531	cds
NM_001002056	532	561	cds
NM_001002056	571	599	cds
NM_001002056	601	629	cds
NM_001002056	661	691	cds
NM_001002056	692	721	cds
NM_001002056	722	751	cds
NM_001002056	831	861	cds
NM_001002056	862	891	cds
NM_001002056	901	931	cds
NM_001002056	932	961	cds
NM_001002056	1011	1041	cds
NM_001002056	1042	1071	cds
NM_001002056	1101	1129	cds
NM_001002056	1171	1199	cds
NM_001002056	1221	1251	cds
NM_001002056	1252	1281	cds
NM_001002056	1271	1299	cds
NM_001002056	1341	1369	cds
NM_001002057	61	89	utr5
NM_001002057	61	89	cds
NM_001002057	131	161	cds
NM_001002057	221	251	cds
NM_001002057	252	281	cds
NM_001002057	282	311	cds
NM_001002057	471	501	cds
NM_001002057	511	539	cds
NM_001002057	551	579	cds
NM_001002057	701	729	cds
NM_001002057	731	761	cds
NM_001002057	921	951	cds
NM_001002057	952	981	cds
NM_001002057	1061	1089	utr3
NM_001002058	11	39	utr5
NM_001002058	41	69	utr5
NM_001002058	191	219	cds
NM_001002058	241	269	cds
NM_001002058	371	401	cds
NM_001002058	411	439	cds
NM_001002058	541	569	cds
NM_001002058	591	619	cds
NM_001002058	691	719	cds
NM_001002058	731	759	cds
NM_001002058	821	849	cds
NM_001002058	881	909	cds
NM_001002058	1001	1029	cds
NM_001002058	1071	1099	cds
NM_001002058	1121	1149	cds
NM_001002058	1171	1201	cds
NM_001002058	1202	1231	utr3
NM_001002058	1202	1231	cds
NM_001002058	1232	1261	utr3
NM_001002058	1262	1291	utr3
NM_001002058	1292	1321	utr3
NM_001002058	1322	1351	utr3
NM_001002058	1352	1381	utr3
NM_001002061	271	299	cds
NM_001002061	551	579	cds
NM_001002061	761	791	cds
NM_001002061	792	821	utr3
NM_001002061	792	821	cds
NM_001002061	811	839	utr3
NM_001002061	861	889	utr3
NM_001002061	911	939	utr3
NM_001002061	1121	1149	utr3
NM_001002063	261	289	cds
NM_001002063	311	339	cds
NM_001002063	371	399	cds
NM_001002063	501	529	cds
NM_001002063	551	579	cds
NM_001002063	581	611	cds
NM_001002063	612	641	cds
NM_001002063	642	671	cds
NM_001002063	671	701	cds
NM_001002063	702	731	cds
NM_001002063	911	939	cds
NM_001002063	1051	1079	cds
NM_001002063	1141	1169	cds
NM_001002063	1231	1261	cds
NM_001002063	1262	1291	cds
NM_001002063	1411	1439	cds
NM_001002063	1461	1489	cds
NM_001002063	1541	1569	cds
NM_001002063	1611	1639	cds
NM_001002063	1701	1731	cds
NM_001002063	1901	1931	cds
NM_001002063	1932	1961	cds
NM_001002064	151	179	utr5
NM_001002064	151	179	cds
NM_001002064	241	269	cds
NM_001002064	291	319	cds
NM_001002064	351	379	cds
NM_001002064	441	469	cds
NM_001002064	531	561	cds
NM_001002064	562	591	cds
NM_001002064	741	771	cds
NM_001002064	772	801	cds
NM_001002064	901	929	cds
NM_001002064	1141	1169	cds
NM_001002064	1231	1259	cds
NM_001002064	1311	1339	cds
NM_001002064	1341	1371	cds
NM_001002064	1372	1401	utr3
NM_001002064	1372	1401	cds
NM_001002064	1402	1431	utr3
NM_001002064	1531	1559	utr3
NM_001002065	111	139	cds
NM_001002065	311	339	cds
NM_001002065	751	779	cds
NM_001002065	1041	1069	cds
NM_001002065	1151	1181	cds
NM_001002065	1182	1211	utr3
NM_001002065	1182	1211	cds
NM_001002065	1261	1289	utr3
NM_001002067	41	69	utr5
NM_001002067	81	109	utr5
NM_001002067	121	149	utr5
NM_001002067	121	149	cds
NM_001002067	281	309	cds
NM_001002067	331	359	cds
NM_001002067	371	399	cds
NM_001002067	401	431	cds
NM_001002067	432	461	cds
NM_001002067	491	519	cds
NM_001002067	611	641	utr3
NM_001002067	642	671	utr3
NM_001002068	11	41	utr5
NM_001002068	91	121	cds
NM_001002068	122	151	cds
NM_001002068	152	181	cds
NM_001002068	211	241	cds
NM_001002068	242	271	cds
NM_001002068	321	349	cds
NM_001002068	501	531	utr3
NM_001002068	621	651	utr3
NM_001002069	1	31	utr5
NM_001002069	1	31	cds
NM_001002069	32	61	cds
NM_001002069	151	181	cds
NM_001002069	182	211	cds
NM_001002069	211	239	cds
NM_001002069	281	311	cds
NM_001002070	21	51	utr5
NM_001002070	52	81	cds
NM_001002070	121	151	cds
NM_001002070	152	181	cds
NM_001002070	241	271	cds
NM_001002070	461	491	cds
NM_001002070	492	521	cds
NM_001002070	531	559	cds
NM_001002070	631	659	cds
NM_001002070	781	809	cds
NM_001002070	971	1001	cds
NM_001002070	1002	1031	cds
NM_001002070	1051	1079	cds
NM_001002070	1171	1199	cds
NM_001002071	181	209	cds
NM_001002071	281	309	cds
NM_001002071	311	341	cds
NM_001002071	342	371	cds
NM_001002071	431	459	cds
NM_001002071	561	591	cds
NM_001002071	592	621	cds
NM_001002071	791	821	cds
NM_001002071	911	939	cds
NM_001002071	961	989	cds
NM_001002071	1081	1109	cds
NM_001002072	61	91	cds
NM_001002072	361	389	cds
NM_001002072	411	439	cds
NM_001002072	481	509	utr3
NM_001002072	481	509	cds
NM_001002072	601	631	utr3
NM_001002072	801	831	utr3
NM_001002072	832	861	utr3
NM_001002072	951	981	utr3
NM_001002072	982	1011	utr3
NM_001002072	1051	1079	utr3
NM_001002072	1101	1131	utr3
NM_001002073	121	149	cds
NM_001002073	211	241	cds
NM_001002073	261	289	cds
NM_001002073	301	331	cds
NM_001002073	421	449	utr3
NM_001002073	421	449	cds
NM_001002073	451	481	utr3
NM_001002073	482	511	utr3
NM_001002073	551	581	utr3
NM_001002073	582	611	utr3
NM_001002073	661	689	utr3
NM_001002073	691	719	utr3
NM_001002073	721	749	utr3
NM_001002073	801	829	utr3
NM_001002073	861	891	utr3
NM_001002073	892	921	utr3
NM_001002073	1031	1059	utr3
NM_001002073	1111	1139	utr3
NM_001002073	1141	1169	utr3
NM_001002077	161	191	cds
NM_001002077	201	229	cds
NM_001002078	141	169	cds
NM_001002078	331	359	utr3
NM_001002079	1	29	utr5
NM_001002079	1	29	cds
NM_001002079	81	109	cds
NM_001002079	111	139	cds
NM_001002079	221	249	cds
NM_001002080	1871	1899	cds
NM_001002080	2221	2249	cds
NM_001002080	2251	2279	cds
NM_001002080	2501	2529	cds
NM_001002080	2571	2601	cds
NM_001002080	2602	2631	cds
NM_001002080	2621	2651	cds
NM_001002080	2791	2819	cds
NM_001002080	2971	2999	cds
NM_001002080	3211	3239	cds
NM_001002080	3291	3321	cds
NM_001002080	3322	3351	cds
NM_001002080	3351	3381	cds
NM_001002080	3382	3411	cds
NM_001002081	11	41	utr5
NM_001002081	71	101	cds
NM_001002081	102	131	cds
NM_001002081	132	161	cds
NM_001002081	162	191	cds
NM_001002081	192	221	cds
NM_001002081	222	251	cds
NM_001002081	252	281	cds
NM_001002081	291	321	cds
NM_001002081	351	381	cds
NM_001002081	382	411	cds
NM_001002081	461	489	utr3
NM_001002081	491	521	utr3
NM_001002082	91	121	cds
NM_001002082	211	239	cds
NM_001002082	251	279	cds
NM_001002082	331	359	cds
NM_001002082	401	429	cds
NM_001002082	461	491	cds
NM_001002082	492	521	cds
NM_001002082	531	559	cds
NM_001002082	661	691	utr3
NM_001002082	701	731	utr3
NM_001002082	732	761	utr3
NM_001002082	811	841	utr3
NM_001002082	842	871	utr3
NM_001002082	872	901	utr3
NM_001002083	531	559	cds
NM_001002083	711	741	cds
NM_001002083	1021	1049	utr3
NM_001002084	61	89	cds
NM_001002084	881	909	utr3
NM_001002086	191	219	cds
NM_001002086	291	319	cds
NM_001002086	351	381	cds
NM_001002086	382	411	cds
NM_001002086	761	791	cds
NM_001002086	792	821	utr3
NM_001002086	792	821	cds
NM_001002086	822	851	utr3
NM_001002086	891	919	utr3
NM_001002086	971	1001	utr3
NM_001002086	1061	1089	utr3
NM_001002086	1221	1251	utr3
NM_001002086	1301	1329	utr3
NM_001002087	1611	1639	utr3
NM_001002087	1781	1809	utr3
NM_001002087	1841	1869	utr3
NM_001002089	31	59	utr5
NM_001002089	61	89	utr5
NM_001002089	91	121	utr5
NM_001002089	161	189	utr5
NM_001002089	231	259	utr5
NM_001002089	471	501	cds
NM_001002089	502	531	cds
NM_001002089	841	869	cds
NM_001002089	911	939	cds
NM_001002089	971	999	cds
NM_001002089	1111	1139	cds
NM_001002089	1161	1191	cds
NM_001002089	1192	1221	cds
NM_001002089	1331	1361	cds
NM_001002089	1362	1391	cds
NM_001002089	1821	1849	utr3
NM_001002096	1441	1469	utr3
NM_001002097	171	201	cds
NM_001002097	251	281	utr3
NM_001002097	251	281	cds
NM_001002097	282	311	utr3
NM_001002097	381	409	utr3
NM_001002097	421	449	utr3
NM_001002097	461	491	utr3
NM_001002097	541	571	utr3
NM_001002097	572	601	utr3
NM_001002097	602	631	utr3
NM_001002097	631	659	utr3
NM_001002097	781	809	utr3
NM_001002097	821	849	utr3
NM_001002097	881	909	utr3
NM_001002099	91	121	utr5
NM_001002099	91	121	cds
NM_001002099	151	179	cds
NM_001002099	201	229	cds
NM_001002099	361	391	cds
NM_001002099	661	689	cds
NM_001002099	711	739	cds
NM_001002099	751	779	cds
NM_001002099	881	909	cds
NM_001002099	1071	1099	utr3
NM_001002099	1141	1169	utr3
NM_001002099	1221	1251	utr3
NM_001002099	1401	1429	utr3
NM_001002099	1451	1479	utr3
NM_001002099	1591	1621	utr3
NM_001002099	1622	1651	utr3
NM_001002104	1	29	utr5
NM_001002104	71	101	cds
NM_001002104	102	131	cds
NM_001002104	301	329	cds
NM_001002104	481	509	cds
NM_001002104	511	541	cds
NM_001002104	542	571	cds
NM_001002104	561	589	cds
NM_001002104	601	631	cds
NM_001002104	632	661	cds
NM_001002104	791	819	cds
NM_001002104	831	861	cds
NM_001002104	862	891	cds
NM_001002104	892	921	cds
NM_001002104	971	999	utr3
NM_001002104	971	999	cds
NM_001002104	1241	1269	utr3
NM_001002104	1321	1349	utr3
NM_001002104	1351	1381	utr3
NM_001002104	1382	1411	utr3
NM_001002104	1421	1451	utr3
NM_001002104	1521	1551	utr3
NM_001002105	201	229	cds
NM_001002105	451	479	cds
NM_001002105	1391	1419	cds
NM_001002105	1501	1531	cds
NM_001002105	1532	1561	cds
NM_001002106	41	69	utr5
NM_001002106	141	169	cds
NM_001002106	251	279	cds
NM_001002106	481	509	cds
NM_001002106	571	599	cds
NM_001002106	721	749	cds
NM_001002106	871	899	cds
NM_001002106	911	941	cds
NM_001002106	942	971	utr3
NM_001002106	942	971	cds
NM_001002108	131	159	cds
NM_001002108	391	419	cds
NM_001002108	671	701	cds
NM_001002108	801	829	utr3
NM_001002111	31	59	utr5
NM_001002111	701	731	utr3
NM_001002111	732	761	utr3
NM_001002111	821	849	utr3
NM_001002111	1061	1089	utr3
NM_001002111	1201	1231	utr3
NM_001002113	111	139	cds
NM_001002113	211	239	cds
NM_001002113	241	269	cds
NM_001002113	481	511	cds
NM_001002113	512	541	cds
NM_001002113	571	599	cds
NM_001002113	651	679	cds
NM_001002113	691	719	cds
NM_001002113	751	781	cds
NM_001002113	801	831	cds
NM_001002113	881	911	cds
NM_001002113	951	979	cds
NM_001002113	1041	1071	utr3
NM_001002113	1081	1109	utr3
NM_001002113	1331	1359	utr3
NM_001002113	1411	1439	utr3
NM_001002113	1511	1539	utr3
NM_001002113	1651	1679	utr3
NM_001002115	91	121	cds
NM_001002115	122	151	cds
NM_001002115	161	189	cds
NM_001002115	211	239	cds
NM_001002115	251	279	cds
NM_001002115	301	331	cds
NM_001002115	351	381	cds
NM_001002115	401	429	cds
NM_001002115	431	461	cds
NM_001002115	471	501	cds
NM_001002115	502	531	cds
NM_001002115	532	561	cds
NM_001002115	561	589	cds
NM_001002115	591	619	cds
NM_001002115	681	709	cds
NM_001002115	771	801	cds
NM_001002115	802	831	cds
NM_001002115	832	861	utr3
NM_001002115	832	861	cds
NM_001002115	862	891	utr3
NM_001002115	1061	1091	utr3
NM_001002115	1092	1121	utr3
NM_001002115	1122	1151	utr3
NM_001002115	1152	1181	utr3
NM_001002115	1251	1279	utr3
NM_001002115	1291	1319	utr3
NM_001002115	1321	1351	utr3
NM_001002115	1352	1381	utr3
NM_001002116	131	159	cds
NM_001002116	241	269	cds
NM_001002116	291	321	cds
NM_001002116	421	451	cds
NM_001002116	452	481	cds
NM_001002116	511	541	cds
NM_001002116	542	571	cds
NM_001002116	711	741	cds
NM_001002116	751	779	cds
NM_001002116	901	929	cds
NM_001002116	1101	1129	cds
NM_001002116	1181	1209	utr3
NM_001002116	1181	1209	cds
NM_001002116	1331	1361	utr3
NM_001002116	1362	1391	utr3
NM_001002116	1461	1489	utr3
NM_001002116	1511	1539	utr3
NM_001002116	1561	1591	utr3
NM_001002116	1592	1621	utr3
NM_001002116	1631	1659	utr3
NM_001002118	441	469	cds
NM_001002118	481	509	cds
NM_001002118	601	629	cds
NM_001002119	391	421	cds
NM_001002119	451	481	cds
NM_001002119	482	511	cds
NM_001002119	561	591	cds
NM_001002119	771	799	cds
NM_001002119	821	851	cds
NM_001002119	852	881	cds
NM_001002120	401	429	cds
NM_001002120	1231	1259	cds
NM_001002120	1311	1339	cds
NM_001002120	1601	1629	cds
NM_001002120	1631	1659	cds
NM_001002120	1781	1809	cds
NM_001002120	2041	2069	utr3
NM_001002121	111	139	utr5
NM_001002121	111	139	cds
NM_001002121	191	219	cds
NM_001002121	241	269	cds
NM_001002121	271	299	cds
NM_001002121	301	331	cds
NM_001002121	332	361	cds
NM_001002121	361	389	cds
NM_001002121	391	419	cds
NM_001002121	471	499	cds
NM_001002121	521	551	cds
NM_001002121	552	581	cds
NM_001002121	582	611	cds
NM_001002121	612	641	cds
NM_001002121	691	719	cds
NM_001002121	831	859	cds
NM_001002121	861	889	cds
NM_001002121	891	919	cds
NM_001002121	951	979	cds
NM_001002121	1051	1079	cds
NM_001002121	1131	1159	cds
NM_001002121	1201	1229	cds
NM_001002121	1241	1271	cds
NM_001002121	1272	1301	cds
NM_001002121	1421	1449	cds
NM_001002121	1461	1491	cds
NM_001002121	1492	1521	cds
NM_001002121	1541	1571	cds
NM_001002121	1601	1631	utr3
NM_001002121	1601	1631	cds
NM_001002121	1632	1661	utr3
NM_001002121	1761	1791	utr3
NM_001002121	1792	1821	utr3
NM_001002121	1822	1851	utr3
NM_001002121	1851	1879	utr3
NM_001002121	1921	1951	utr3
NM_001002121	1952	1981	utr3
NM_001002121	1991	2019	utr3
NM_001002123	21	49	cds
NM_001002123	251	279	cds
NM_001002123	321	349	cds
NM_001002123	461	489	cds
NM_001002124	101	129	cds
NM_001002124	251	281	cds
NM_001002124	551	579	cds
NM_001002124	731	759	utr3
NM_001002124	761	789	utr3
NM_001002127	201	229	cds
NM_001002127	301	331	cds
NM_001002127	401	429	cds
NM_001002127	601	629	cds
NM_001002127	721	751	cds
NM_001002127	752	781	cds
NM_001002127	782	811	cds
NM_001002127	851	881	cds
NM_001002127	882	911	cds
NM_001002127	911	939	cds
NM_001002127	1121	1149	utr3
NM_001002128	251	279	cds
NM_001002128	451	481	cds
NM_001002128	482	511	cds
NM_001002128	512	541	cds
NM_001002128	641	671	cds
NM_001002128	701	729	cds
NM_001002128	751	781	cds
NM_001002128	782	811	cds
NM_001002128	911	939	cds
NM_001002128	981	1009	cds
NM_001002128	1051	1079	cds
NM_001002128	1091	1119	cds
NM_001002128	1211	1241	cds
NM_001002128	1242	1271	cds
NM_001002128	1411	1439	utr3
NM_001002128	1481	1509	utr3
NM_001002128	1521	1549	utr3
NM_001002130	811	839	utr3
NM_001002130	911	939	utr3
NM_001002130	1001	1029	utr3
NM_001002130	1211	1239	utr3
NM_001002130	1291	1319	utr3
NM_001002130	1471	1501	utr3
NM_001002130	1502	1531	utr3
NM_001002130	1651	1679	utr3
NM_001002130	1701	1731	utr3
NM_001002130	1732	1761	utr3
NM_001002130	1762	1791	utr3
NM_001002130	1781	1809	utr3
NM_001002130	1901	1931	utr3
NM_001002130	1932	1961	utr3
NM_001002131	471	499	cds
NM_001002131	521	551	cds
NM_001002131	552	581	cds
NM_001002131	651	679	cds
NM_001002131	711	741	cds
NM_001002131	742	771	cds
NM_001002131	772	801	cds
NM_001002131	802	831	cds
NM_001002131	931	959	utr3
NM_001002131	991	1021	utr3
NM_001002131	1022	1051	utr3
NM_001002131	1081	1109	utr3
NM_001002131	1311	1339	utr3
NM_001002137	161	191	cds
NM_001002137	291	321	cds
NM_001002137	322	351	cds
NM_001002137	361	391	cds
NM_001002137	451	479	cds
NM_001002137	691	721	utr3
NM_001002137	761	789	utr3
NM_001002137	901	929	utr3
NM_001002137	941	969	utr3
NM_001002139	201	231	cds
NM_001002139	481	511	cds
NM_001002139	512	541	cds
NM_001002140	131	159	utr5
NM_001002140	1141	1169	utr3
NM_001002140	1181	1209	utr3
NM_001002144	61	89	cds
NM_001002144	91	119	cds
NM_001002144	191	219	cds
NM_001002144	251	281	cds
NM_001002144	351	379	cds
NM_001002144	691	719	utr3
NM_001002144	731	759	utr3
NM_001002145	581	609	cds
NM_001002145	931	959	cds
NM_001002145	1161	1191	cds
NM_001002145	1281	1311	utr3
NM_001002145	1571	1599	utr3
NM_001002145	1601	1631	utr3
NM_001002147	131	159	cds
NM_001002147	171	199	cds
NM_001002147	201	229	cds
NM_001002147	251	279	cds
NM_001002147	281	309	cds
NM_001002147	311	339	cds
NM_001002147	621	651	utr3
NM_001002147	652	681	utr3
NM_001002147	731	759	utr3
NM_001002147	761	791	utr3
NM_001002147	811	841	utr3
NM_001002147	842	871	utr3
NM_001002147	901	931	utr3
NM_001002148	341	369	cds
NM_001002148	551	579	cds
NM_001002148	621	649	cds
NM_001002148	771	799	cds
NM_001002148	921	949	cds
NM_001002148	1111	1141	cds
NM_001002151	1061	1089	cds
NM_001002151	1181	1209	utr3
NM_001002151	1281	1309	utr3
NM_001002151	1361	1391	utr3
NM_001002151	1521	1549	utr3
NM_001002151	1641	1669	utr3
NM_001002151	1861	1889	utr3
NM_001002152	111	141	cds
NM_001002152	142	171	cds
NM_001002152	381	409	cds
NM_001002152	441	469	cds
NM_001002152	591	621	cds
NM_001002152	622	651	cds
NM_001002152	701	731	utr3
NM_001002152	921	951	utr3
NM_001002152	1111	1139	utr3
NM_001002152	1211	1239	utr3
NM_001002152	1271	1299	utr3
NM_001002152	1321	1351	utr3
NM_001002152	1352	1381	utr3
NM_001002152	1382	1411	utr3
NM_001002152	1412	1441	utr3
NM_001002152	1451	1479	utr3
NM_001002152	1561	1589	utr3
NM_001002152	1591	1619	utr3
NM_001002152	1661	1691	utr3
NM_001002153	221	249	cds
NM_001002153	361	389	cds
NM_001002155	81	111	cds
NM_001002155	112	141	cds
NM_001002155	141	169	cds
NM_001002155	181	209	cds
NM_001002155	211	239	cds
NM_001002155	411	441	cds
NM_001002157	41	71	cds
NM_001002157	72	101	cds
NM_001002157	102	131	cds
NM_001002157	201	229	cds
NM_001002157	261	289	cds
NM_001002157	311	339	cds
NM_001002157	381	409	cds
NM_001002157	491	519	cds
NM_001002157	551	579	cds
NM_001002157	661	689	cds
NM_001002157	691	719	cds
NM_001002157	801	831	cds
NM_001002157	832	861	cds
NM_001002157	911	941	cds
NM_001002157	942	971	cds
NM_001002157	971	1001	cds
NM_001002157	1011	1041	cds
NM_001002157	1051	1079	cds
NM_001002157	1141	1169	utr3
NM_001002157	1141	1169	cds
NM_001002157	1211	1239	utr3
NM_001002157	1291	1321	utr3
NM_001002157	1322	1351	utr3
NM_001002157	1401	1429	utr3
NM_001002158	1211	1239	utr3
NM_001002158	1251	1279	utr3
NM_001002160	71	99	cds
NM_001002160	131	161	cds
NM_001002160	162	191	cds
NM_001002160	192	221	cds
NM_001002160	241	271	cds
NM_001002160	272	301	cds
NM_001002160	311	339	cds
NM_001002160	341	371	cds
NM_001002160	411	439	cds
NM_001002160	451	481	cds
NM_001002160	482	511	cds
NM_001002160	511	539	cds
NM_001002160	671	699	cds
NM_001002160	701	731	cds
NM_001002160	732	761	cds
NM_001002160	762	791	cds
NM_001002160	781	809	cds
NM_001002160	1041	1071	cds
NM_001002160	1072	1101	cds
NM_001002160	1121	1149	utr3
NM_001002160	1241	1269	utr3
NM_001002160	1301	1329	utr3
NM_001002160	1421	1451	utr3
NM_001002160	1452	1481	utr3
NM_001002161	51	79	utr5
NM_001002161	81	109	utr5
NM_001002161	121	149	utr5
NM_001002161	221	249	utr5
NM_001002161	341	369	cds
NM_001002161	401	429	cds
NM_001002161	751	779	cds
NM_001002161	811	839	cds
NM_001002161	871	899	cds
NM_001002161	901	931	cds
NM_001002161	932	961	cds
NM_001002161	961	991	cds
NM_001002161	1001	1031	cds
NM_001002161	1032	1061	cds
NM_001002161	1081	1111	cds
NM_001002161	1112	1141	cds
NM_001002161	1142	1171	cds
NM_001002161	1221	1249	cds
NM_001002161	1301	1329	cds
NM_001002161	1351	1379	cds
NM_001002161	1411	1439	cds
NM_001002161	1561	1591	cds
NM_001002161	1621	1649	cds
NM_001002161	1671	1699	cds
NM_001002161	1781	1811	utr3
NM_001002161	1812	1841	utr3
NM_001002161	1842	1871	utr3
NM_001002162	31	59	utr5
NM_001002162	61	89	utr5
NM_001002162	141	169	cds
NM_001002162	411	441	cds
NM_001002162	442	471	cds
NM_001002162	511	539	cds
NM_001002162	641	669	cds
NM_001002162	731	759	cds
NM_001002162	781	811	cds
NM_001002162	831	859	cds
NM_001002162	891	919	utr3
NM_001002162	1031	1061	utr3
NM_001002162	1111	1139	utr3
NM_001002162	1191	1219	utr3
NM_001002162	1251	1281	utr3
NM_001002162	1282	1311	utr3
NM_001002162	1461	1489	utr3
NM_001002162	1601	1629	utr3
NM_001002162	1631	1659	utr3
NM_001002162	1751	1779	utr3
NM_001002162	1841	1869	utr3
NM_001002163	91	119	cds
NM_001002163	141	169	cds
NM_001002163	191	221	cds
NM_001002163	222	251	cds
NM_001002163	351	381	cds
NM_001002163	382	411	cds
NM_001002163	501	529	utr3
NM_001002164	11	41	utr5
NM_001002164	42	71	utr5
NM_001002164	101	131	utr5
NM_001002164	132	161	utr5
NM_001002164	132	161	cds
NM_001002164	181	209	cds
NM_001002164	211	239	cds
NM_001002164	241	271	cds
NM_001002164	272	301	cds
NM_001002164	302	331	cds
NM_001002164	332	361	cds
NM_001002164	441	471	cds
NM_001002164	481	509	cds
NM_001002164	601	631	cds
NM_001002164	632	661	cds
NM_001002164	691	719	cds
NM_001002164	731	759	cds
NM_001002164	791	819	cds
NM_001002164	871	899	cds
NM_001002164	1121	1151	cds
NM_001002164	1161	1191	cds
NM_001002164	1291	1321	cds
NM_001002164	1322	1351	utr3
NM_001002164	1322	1351	cds
NM_001002164	1352	1381	utr3
NM_001002164	1371	1399	utr3
NM_001002164	1421	1449	utr3
NM_001002164	1481	1511	utr3
NM_001002165	1341	1369	cds
NM_001002165	1771	1799	utr3
NM_001002165	1991	2019	utr3
NM_001002165	2141	2169	utr3
NM_001002165	2211	2241	utr3
NM_001002165	2242	2271	utr3
NM_001002165	2301	2329	utr3
NM_001002165	2421	2451	utr3
NM_001002165	2471	2499	utr3
NM_001002165	2501	2531	utr3
NM_001002165	2532	2561	utr3
NM_001002165	2611	2639	utr3
NM_001002165	2691	2719	utr3
NM_001002165	2881	2909	utr3
NM_001002165	2931	2959	utr3
NM_001002166	5021	5049	utr3
NM_001002171	141	169	utr5
NM_001002171	141	169	cds
NM_001002172	101	131	utr5
NM_001002172	101	131	cds
NM_001002172	132	161	cds
NM_001002172	171	201	cds
NM_001002172	202	231	cds
NM_001002172	232	261	cds
NM_001002172	331	359	cds
NM_001002172	471	499	cds
NM_001002172	541	571	cds
NM_001002172	611	641	cds
NM_001002172	671	699	cds
NM_001002172	821	849	cds
NM_001002172	911	939	cds
NM_001002172	1111	1139	cds
NM_001002172	1231	1259	cds
NM_001002172	1281	1309	utr3
NM_001002172	1281	1309	cds
NM_001002172	1371	1401	utr3
NM_001002172	1421	1449	utr3
NM_001002172	1451	1481	utr3
NM_001002172	1511	1541	utr3
NM_001002172	1551	1581	utr3
NM_001002172	1582	1611	utr3
NM_001002172	1681	1709	utr3
NM_001002173	2211	2239	utr3
NM_001002173	2321	2349	utr3
NM_001002173	2461	2489	utr3
NM_001002173	2531	2559	utr3
NM_001002173	2671	2701	utr3
NM_001002173	2702	2731	utr3
NM_001002179	71	99	utr5
NM_001002179	71	99	cds
NM_001002179	111	141	cds
NM_001002179	142	171	cds
NM_001002179	172	201	cds
NM_001002179	541	571	cds
NM_001002179	572	601	cds
NM_001002179	631	659	cds
NM_001002179	671	699	cds
NM_001002179	711	741	cds
NM_001002179	742	771	cds
NM_001002179	772	801	cds
NM_001002179	811	841	cds
NM_001002179	842	871	cds
NM_001002179	901	929	cds
NM_001002179	1061	1089	cds
NM_001002179	1091	1121	cds
NM_001002179	1122	1151	utr3
NM_001002179	1241	1269	utr3
NM_001002179	1291	1319	utr3
NM_001002179	1371	1401	utr3
NM_001002179	1402	1431	utr3
NM_001002179	1432	1461	utr3
NM_001002179	1462	1491	utr3
NM_001002179	1501	1529	utr3
NM_001002179	1551	1579	utr3
NM_001002179	1641	1671	utr3
NM_001002179	1672	1701	utr3
NM_001002179	1702	1731	utr3
NM_001002179	1732	1761	utr3
NM_001002179	1831	1861	utr3
NM_001002179	1901	1931	utr3
NM_001002179	1932	1961	utr3
NM_001002179	1962	1991	utr3
NM_001002179	1992	2021	utr3
NM_001002179	2081	2109	utr3
NM_001002179	2121	2149	utr3
NM_001002179	2251	2281	utr3
NM_001002180	1251	1279	cds
NM_001002180	2041	2069	utr3
NM_001002180	2171	2199	utr3
NM_001002180	2321	2351	utr3
NM_001002180	2352	2381	utr3
NM_001002180	2421	2449	utr3
NM_001002180	2611	2639	utr3
NM_001002180	2711	2741	utr3
NM_001002180	2931	2959	utr3
NM_001002184	731	759	utr3
NM_001002184	771	799	utr3
NM_001002198	21	49	utr5
NM_001002198	521	549	cds
NM_001002198	581	609	cds
NM_001002198	641	669	cds
NM_001002198	681	709	cds
NM_001002198	711	739	cds
NM_001002198	911	939	cds
NM_001002198	1121	1151	cds
NM_001002198	1251	1281	cds
NM_001002198	1391	1419	cds
NM_001002198	1471	1499	cds
NM_001002198	1511	1539	cds
NM_001002198	1551	1581	cds
NM_001002198	1582	1611	cds
NM_001002198	1612	1641	cds
NM_001002198	1851	1881	cds
NM_001002198	1981	2009	utr3
NM_001002198	2121	2149	utr3
NM_001002198	2151	2179	utr3
NM_001002199	411	441	cds
NM_001002199	461	489	cds
NM_001002200	71	99	utr5
NM_001002200	171	199	cds
NM_001002200	271	301	cds
NM_001002200	331	359	cds
NM_001002200	361	389	cds
NM_001002200	571	599	cds
NM_001002200	641	671	cds
NM_001002200	672	701	cds
NM_001002200	791	819	cds
NM_001002200	841	871	cds
NM_001002200	872	901	cds
NM_001002200	891	921	cds
NM_001002200	1021	1051	cds
NM_001002200	1121	1149	cds
NM_001002203	1	29	utr5
NM_001002203	1	29	cds
NM_001002203	51	81	cds
NM_001002203	161	191	cds
NM_001002203	192	221	cds
NM_001002203	251	281	cds
NM_001002203	282	311	cds
NM_001002203	312	341	cds
NM_001002203	351	379	utr3
NM_001002203	461	491	utr3
NM_001002203	531	559	utr3
NM_001002203	591	619	utr3
NM_001002203	651	681	utr3
NM_001002203	682	711	utr3
NM_001002203	712	741	utr3
NM_001002204	21	49	utr5
NM_001002204	221	249	cds
NM_001002204	281	311	cds
NM_001002204	441	469	cds
NM_001002204	621	649	cds
NM_001002204	701	729	cds
NM_001002204	771	799	cds
NM_001002204	801	829	cds
NM_001002204	871	899	cds
NM_001002204	931	959	cds
NM_001002204	1091	1119	cds
NM_001002204	1141	1169	utr3
NM_001002204	1231	1259	utr3
NM_001002211	51	81	utr5
NM_001002211	91	121	utr5
NM_001002211	122	151	utr5
NM_001002211	171	201	utr5
NM_001002211	202	231	utr5
NM_001002211	232	261	utr5
NM_001002211	232	261	cds
NM_001002211	281	309	cds
NM_001002211	311	341	cds
NM_001002211	342	371	cds
NM_001002211	521	549	cds
NM_001002211	551	579	cds
NM_001002211	591	619	cds
NM_001002211	731	759	cds
NM_001002211	791	821	cds
NM_001002211	871	899	cds
NM_001002211	941	971	cds
NM_001002211	972	1001	cds
NM_001002211	1002	1031	cds
NM_001002211	1032	1061	utr3
NM_001002211	1032	1061	cds
NM_001002211	1101	1129	utr3
NM_001002211	1221	1251	utr3
NM_001002211	1252	1281	utr3
NM_001002211	1282	1311	utr3
NM_001002211	1331	1359	utr3
NM_001002220	61	89	cds
NM_001002220	251	279	cds
NM_001002220	431	459	cds
NM_001002220	741	769	utr3
NM_001002220	841	871	utr3
NM_001002220	872	901	utr3
NM_001002220	941	969	utr3
NM_001002220	991	1019	utr3
NM_001002220	1021	1051	utr3
NM_001002220	1052	1081	utr3
NM_001002221	121	149	cds
NM_001002221	691	719	cds
NM_001002221	771	801	cds
NM_001002221	802	831	cds
NM_001002221	1121	1151	cds
NM_001002221	1191	1221	utr3
NM_001002221	1222	1251	utr3
NM_001002222	71	99	utr5
NM_001002222	271	299	cds
NM_001002222	371	399	cds
NM_001002222	501	529	cds
NM_001002222	741	769	cds
NM_001002222	841	871	cds
NM_001002222	891	919	cds
NM_001002222	1271	1299	cds
NM_001002222	1611	1639	cds
NM_001002222	1751	1779	cds
NM_001002222	1931	1959	cds
NM_001002222	2031	2059	cds
NM_001002222	2121	2151	cds
NM_001002222	2152	2181	utr3
NM_001002222	2152	2181	cds
NM_001002222	2182	2211	utr3
NM_001002222	2291	2319	utr3
NM_001002222	2421	2449	utr3
NM_001002222	2461	2489	utr3
NM_001002222	2621	2649	utr3
NM_001002222	2661	2689	utr3
NM_001002222	2931	2959	utr3
NM_001002222	3201	3229	utr3
NM_001002222	3451	3479	utr3
NM_001002222	3921	3949	utr3
NM_001002222	4091	4119	utr3
NM_001002222	4141	4171	utr3
NM_001002222	4172	4201	utr3
NM_001002222	4211	4241	utr3
NM_001002222	4242	4271	utr3
NM_001002222	4311	4339	utr3
NM_001002222	4391	4419	utr3
NM_001002222	4431	4459	utr3
NM_001002222	4481	4509	utr3
NM_001002222	4761	4789	utr3
NM_001002222	5111	5141	utr3
NM_001002222	5142	5171	utr3
NM_001002222	5181	5211	utr3
NM_001002222	5212	5241	utr3
NM_001002222	5271	5299	utr3
NM_001002222	5331	5361	utr3
NM_001002222	5362	5391	utr3
NM_001002222	5451	5481	utr3
NM_001002222	5482	5511	utr3
NM_001002222	5541	5569	utr3
NM_001002222	5581	5609	utr3
NM_001002222	5641	5669	utr3
NM_001002222	5691	5719	utr3
NM_001002222	5741	5771	utr3
NM_001002226	151	181	cds
NM_001002226	182	211	cds
NM_001002226	291	319	cds
NM_001002226	721	749	cds
NM_001002226	821	851	cds
NM_001002226	991	1019	utr3
NM_001002226	1131	1161	utr3
NM_001002226	1162	1191	utr3
NM_001002226	1181	1209	utr3
NM_001002298	101	129	utr5
NM_001002298	141	171	utr5
NM_001002298	141	171	cds
NM_001002298	172	201	cds
NM_001002298	221	249	cds
NM_001002298	251	279	cds
NM_001002298	311	339	cds
NM_001002298	441	471	cds
NM_001002298	581	609	cds
NM_001002298	661	691	cds
NM_001002298	711	739	cds
NM_001002298	761	789	cds
NM_001002298	811	841	cds
NM_001002298	842	871	cds
NM_001002298	941	969	cds
NM_001002298	981	1009	cds
NM_001002298	1101	1129	cds
NM_001002298	1221	1249	utr3
NM_001002298	1251	1279	utr3
NM_001002298	1291	1319	utr3
NM_001002298	1321	1349	utr3
NM_001002298	1351	1379	utr3
NM_001002298	1381	1409	utr3
NM_001002298	1431	1459	utr3
NM_001002298	1501	1529	utr3
NM_001002298	1591	1619	utr3
NM_001002298	1751	1779	utr3
NM_001002298	1941	1969	utr3
NM_001002298	2311	2339	utr3
NM_001002298	2381	2409	utr3
NM_001002298	2481	2509	utr3
NM_001002298	2641	2669	utr3
NM_001002298	2681	2711	utr3
NM_001002298	2712	2741	utr3
NM_001002298	2741	2769	utr3
NM_001002298	2791	2819	utr3
NM_001002298	2901	2929	utr3
NM_001002298	2981	3009	utr3
NM_001002298	3081	3109	utr3
NM_001002298	3241	3269	utr3
NM_001002298	3311	3339	utr3
NM_001002298	3441	3471	utr3
NM_001002300	221	249	utr5
NM_001002300	221	249	cds
NM_001002300	341	371	cds
NM_001002300	621	649	cds
NM_001002300	1171	1199	cds
NM_001002300	1211	1239	cds
NM_001002300	1241	1269	cds
NM_001002300	1271	1299	cds
NM_001002300	1341	1369	cds
NM_001002300	1381	1409	cds
NM_001002300	1661	1689	cds
NM_001002300	1771	1801	cds
NM_001002300	1802	1831	cds
NM_001002300	1841	1871	cds
NM_001002300	1872	1901	cds
NM_001002300	2051	2079	cds
NM_001002300	2111	2141	utr3
NM_001002300	2161	2191	utr3
NM_001002300	2351	2381	utr3
NM_001002300	2382	2411	utr3
NM_001002300	2411	2439	utr3
NM_001002300	2511	2539	utr3
NM_001002300	2601	2631	utr3
NM_001002300	2632	2661	utr3
NM_001002300	2661	2689	utr3
NM_001002304	301	329	cds
NM_001002304	611	639	cds
NM_001002304	711	739	cds
NM_001002304	761	789	cds
NM_001002304	871	901	cds
NM_001002304	902	931	cds
NM_001002304	1081	1111	utr3
NM_001002304	1081	1111	cds
NM_001002304	1112	1141	utr3
NM_001002304	1201	1229	utr3
NM_001002304	1451	1479	utr3
NM_001002304	2001	2029	utr3
NM_001002304	2071	2099	utr3
NM_001002304	2141	2169	utr3
NM_001002304	2231	2261	utr3
NM_001002304	2262	2291	utr3
NM_001002304	2331	2359	utr3
NM_001002304	2371	2399	utr3
NM_001002304	2441	2469	utr3
NM_001002315	21	49	utr5
NM_001002315	51	81	utr5
NM_001002315	151	179	utr5
NM_001002315	201	229	utr5
NM_001002315	231	259	utr5
NM_001002315	281	309	utr5
NM_001002315	281	309	cds
NM_001002315	581	609	cds
NM_001002315	661	691	cds
NM_001002315	692	721	cds
NM_001002315	761	791	cds
NM_001002315	792	821	cds
NM_001002315	871	899	cds
NM_001002315	951	979	cds
NM_001002315	1101	1129	cds
NM_001002315	1171	1201	cds
NM_001002315	1202	1231	cds
NM_001002315	1261	1289	cds
NM_001002315	1301	1329	cds
NM_001002315	1491	1519	cds
NM_001002315	1671	1699	utr3
NM_001002315	1721	1749	utr3
NM_001002315	1781	1809	utr3
NM_001002315	1851	1879	utr3
NM_001002315	1951	1981	utr3
NM_001002315	1982	2011	utr3
NM_001002315	2011	2039	utr3
NM_001002315	2081	2111	utr3
NM_001002315	2112	2141	utr3
NM_001002315	2181	2209	utr3
NM_001002315	2221	2249	utr3
NM_001002316	71	99	utr5
NM_001002316	131	159	utr5
NM_001002316	181	211	cds
NM_001002316	212	241	cds
NM_001002316	321	349	cds
NM_001002316	491	519	cds
NM_001002316	931	959	cds
NM_001002316	961	991	cds
NM_001002316	1051	1079	cds
NM_001002316	1081	1109	cds
NM_001002316	1111	1141	cds
NM_001002316	1142	1171	cds
NM_001002316	1361	1389	cds
NM_001002316	1521	1549	cds
NM_001002316	1641	1669	utr3
NM_001002316	1791	1819	utr3
NM_001002316	1881	1909	utr3
NM_001002317	1	31	utr5
NM_001002317	32	61	utr5
NM_001002317	81	109	utr5
NM_001002317	81	109	cds
NM_001002317	121	151	cds
NM_001002317	161	191	cds
NM_001002317	192	221	cds
NM_001002317	391	419	cds
NM_001002317	431	461	cds
NM_001002317	491	519	cds
NM_001002318	591	621	cds
NM_001002318	622	651	cds
NM_001002318	841	869	utr3
NM_001002318	1151	1179	utr3
NM_001002318	1201	1229	utr3
NM_001002318	1441	1469	utr3
NM_001002318	1681	1709	utr3
NM_001002318	1721	1749	utr3
NM_001002318	1811	1839	utr3
NM_001002319	271	299	cds
NM_001002319	591	621	cds
NM_001002319	781	809	cds
NM_001002319	811	841	cds
NM_001002319	842	871	cds
NM_001002319	872	901	cds
NM_001002319	911	939	cds
NM_001002319	1101	1129	utr3
NM_001002319	1101	1129	cds
NM_001002319	1271	1301	utr3
NM_001002319	1302	1331	utr3
NM_001002319	1551	1579	utr3
NM_001002319	1631	1661	utr3
NM_001002319	1662	1691	utr3
NM_001002319	1681	1709	utr3
NM_001002319	1721	1749	utr3
NM_001002319	1751	1779	utr3
NM_001002319	1811	1839	utr3
NM_001002319	1911	1939	utr3
NM_001002319	1941	1969	utr3
NM_001002319	1981	2009	utr3
NM_001002319	2051	2079	utr3
NM_001002319	2261	2289	utr3
NM_001002321	1	31	utr5
NM_001002321	32	61	utr5
NM_001002321	161	189	cds
NM_001002321	191	219	cds
NM_001002321	231	261	cds
NM_001002321	262	291	cds
NM_001002321	411	441	cds
NM_001002321	442	471	cds
NM_001002321	531	559	cds
NM_001002321	611	639	cds
NM_001002321	831	859	cds
NM_001002321	871	899	cds
[truncated: 98,089 more rows]

## Sheet: 2hpf->4hpf
TransID	start(0-based)	end(0-based)	region
NM_001001399	41	71	utr5
NM_001001399	72	101	utr5
NM_001001399	72	101	cds
NM_001001399	241	271	cds
NM_001001399	272	301	cds
NM_001001399	311	341	cds
NM_001001399	342	371	cds
NM_001001399	371	401	cds
NM_001001399	402	431	cds
NM_001001399	501	531	cds
NM_001001399	532	561	cds
NM_001001399	671	701	utr3
NM_001001399	702	731	utr3
NM_001001399	761	789	utr3
NM_001001399	831	859	utr3
NM_001001399	901	929	utr3
NM_001001399	931	961	utr3
NM_001001399	962	991	utr3
NM_001001399	991	1019	utr3
NM_001001400	501	529	cds
NM_001001400	811	839	cds
NM_001001400	1211	1241	cds
NM_001001400	1261	1289	cds
NM_001001400	1301	1329	cds
NM_001001400	1331	1359	cds
NM_001001400	1361	1391	cds
NM_001001400	1491	1519	cds
NM_001001400	1571	1599	cds
NM_001001400	1661	1689	cds
NM_001001400	1691	1719	cds
NM_001001400	1751	1779	cds
NM_001001400	1901	1929	cds
NM_001001400	2011	2041	utr3
NM_001001400	2042	2071	utr3
NM_001001400	2071	2101	utr3
NM_001001400	2102	2131	utr3
NM_001001400	2132	2161	utr3
NM_001001401	121	149	cds
NM_001001401	221	249	cds
NM_001001401	331	361	cds
NM_001001401	362	391	cds
NM_001001401	401	431	cds
NM_001001401	432	461	cds
NM_001001401	451	481	cds
NM_001001401	491	519	cds
NM_001001401	651	681	cds
NM_001001401	682	711	cds
NM_001001401	801	829	cds
NM_001001401	891	919	cds
NM_001001401	951	979	cds
NM_001001401	1001	1029	cds
NM_001001401	1041	1069	cds
NM_001001401	1071	1099	cds
NM_001001401	1151	1179	cds
NM_001001401	1231	1259	cds
NM_001001401	1261	1291	cds
NM_001001401	1301	1329	cds
NM_001001401	1361	1391	cds
NM_001001401	1392	1421	cds
NM_001001401	1451	1479	cds
NM_001001401	1501	1529	cds
NM_001001401	1541	1569	cds
NM_001001401	1671	1701	cds
NM_001001401	1702	1731	cds
NM_001001401	1781	1809	cds
NM_001001401	2041	2069	cds
NM_001001401	2411	2439	utr3
NM_001001401	2561	2589	utr3
NM_001001401	2621	2651	utr3
NM_001001401	2652	2681	utr3
NM_001001401	2691	2719	utr3
NM_001001401	2791	2819	utr3
NM_001001402	601	629	cds
NM_001001402	2501	2529	utr3
NM_001001402	2581	2609	utr3
NM_001001402	2681	2709	utr3
NM_001001403	1221	1249	cds
NM_001001403	1251	1281	cds
NM_001001403	1451	1481	cds
NM_001001403	1961	1989	cds
NM_001001403	2211	2239	cds
NM_001001403	2551	2579	cds
NM_001001403	2681	2709	cds
NM_001001403	2971	3001	cds
NM_001001403	3121	3149	cds
NM_001001403	3151	3181	cds
NM_001001403	3251	3281	cds
NM_001001403	3291	3319	cds
NM_001001403	3321	3349	cds
NM_001001403	3421	3449	cds
NM_001001403	3451	3479	cds
NM_001001403	3601	3629	cds
NM_001001403	3631	3659	cds
NM_001001403	3681	3711	utr3
NM_001001403	3712	3741	utr3
NM_001001403	3731	3759	utr3
NM_001001403	3771	3801	utr3
NM_001001403	3802	3831	utr3
NM_001001403	3891	3919	utr3
NM_001001403	4031	4059	utr3
NM_001001404	161	191	cds
NM_001001404	211	241	cds
NM_001001404	251	281	cds
NM_001001404	291	321	cds
NM_001001404	322	351	cds
NM_001001404	352	381	cds
NM_001001404	501	529	cds
NM_001001404	531	559	cds
NM_001001404	561	589	cds
NM_001001404	681	709	cds
NM_001001404	821	849	cds
NM_001001404	871	899	cds
NM_001001404	991	1021	utr3
NM_001001404	1022	1051	utr3
NM_001001404	1061	1091	utr3
NM_001001404	1092	1121	utr3
NM_001001404	1261	1289	utr3
NM_001001404	1291	1321	utr3
NM_001001404	1371	1401	utr3
NM_001001589	11	41	utr5
NM_001001589	71	99	cds
NM_001001589	121	149	cds
NM_001001589	311	339	cds
NM_001001589	351	379	cds
NM_001001589	481	511	cds
NM_001001589	512	541	cds
NM_001001589	541	571	cds
NM_001001589	572	601	cds
NM_001001589	602	631	cds
NM_001001589	632	661	cds
NM_001001589	701	729	cds
NM_001001589	741	771	cds
NM_001001589	791	819	cds
NM_001001589	821	851	cds
NM_001001589	951	981	cds
NM_001001589	1001	1029	cds
NM_001001589	1071	1099	cds
NM_001001589	1131	1159	cds
NM_001001589	1161	1189	cds
NM_001001589	1331	1359	cds
NM_001001589	1421	1451	utr3
NM_001001589	1421	1451	cds
NM_001001589	1452	1481	utr3
NM_001001589	1491	1521	utr3
NM_001001589	1522	1551	utr3
NM_001001589	1571	1601	utr3
NM_001001589	1602	1631	utr3
NM_001001590	81	109	cds
NM_001001590	111	141	cds
NM_001001590	142	171	cds
NM_001001590	171	201	cds
NM_001001590	202	231	cds
NM_001001590	241	269	cds
NM_001001590	321	351	cds
NM_001001590	401	429	cds
NM_001001590	451	479	cds
NM_001001590	481	511	cds
NM_001001590	512	541	cds
NM_001001590	551	579	cds
NM_001001590	1031	1059	cds
NM_001001590	1091	1121	cds
NM_001001590	1151	1179	cds
NM_001001590	1221	1251	cds
NM_001001590	1252	1281	cds
NM_001001590	1281	1311	utr3
NM_001001590	1281	1311	cds
NM_001001590	1312	1341	utr3
NM_001001591	31	59	cds
NM_001001591	141	171	cds
NM_001001591	172	201	cds
NM_001001591	381	409	cds
NM_001001591	461	489	cds
NM_001001591	511	541	cds
NM_001001591	551	581	cds
NM_001001591	641	669	cds
NM_001001591	671	701	cds
NM_001001591	702	731	cds
NM_001001591	732	761	cds
NM_001001591	751	779	cds
NM_001001591	971	999	cds
NM_001001591	1081	1109	cds
NM_001001591	1111	1139	cds
NM_001001591	1141	1171	cds
NM_001001591	1172	1201	cds
NM_001001591	1202	1231	cds
NM_001001591	1281	1309	cds
NM_001001591	1311	1339	cds
NM_001001591	1371	1399	cds
NM_001001591	1451	1479	cds
NM_001001591	1491	1519	cds
NM_001001591	1581	1609	cds
NM_001001591	1641	1671	cds
NM_001001591	1672	1701	cds
NM_001001591	1731	1761	cds
NM_001001591	1991	2021	cds
NM_001001591	2041	2069	cds
NM_001001591	2071	2099	cds
NM_001001591	2101	2131	cds
NM_001001591	2132	2161	cds
NM_001001593	21	49	utr5
NM_001001593	21	49	cds
NM_001001593	111	141	cds
NM_001001593	142	171	cds
NM_001001593	171	201	cds
NM_001001593	202	231	cds
NM_001001593	351	379	cds
NM_001001594	1141	1171	utr3
NM_001001594	1501	1529	utr3
NM_001001724	31	61	utr5
NM_001001724	62	91	utr5
NM_001001724	131	159	utr5
NM_001001724	221	251	cds
NM_001001724	252	281	cds
NM_001001724	282	311	cds
NM_001001724	311	341	cds
NM_001001724	342	371	cds
NM_001001724	361	391	cds
NM_001001724	392	421	cds
NM_001001724	421	451	cds
NM_001001724	452	481	cds
NM_001001724	491	521	cds
NM_001001724	522	551	cds
NM_001001724	591	619	utr3
NM_001001724	691	721	utr3
NM_001001724	731	761	utr3
NM_001001724	762	791	utr3
NM_001001724	801	831	utr3
NM_001001724	832	861	utr3
NM_001001724	871	901	utr3
NM_001001724	902	931	utr3
NM_001001724	1141	1171	utr3
NM_001001724	1172	1201	utr3
NM_001001729	41	71	utr5
NM_001001729	72	101	utr5
NM_001001729	261	289	cds
NM_001001729	311	339	cds
NM_001001729	421	451	cds
NM_001001729	501	529	cds
NM_001001729	611	639	cds
NM_001001729	651	679	cds
NM_001001729	801	831	utr3
NM_001001729	801	831	cds
NM_001001729	851	879	utr3
NM_001001729	951	979	utr3
NM_001001729	1041	1069	utr3
NM_001001729	1261	1291	utr3
NM_001001729	1301	1331	utr3
NM_001001729	1391	1419	utr3
NM_001001729	1441	1469	utr3
NM_001001729	1671	1699	utr3
NM_001001729	1751	1779	utr3
NM_001001729	1861	1889	utr3
NM_001001729	1951	1979	utr3
NM_001001729	2051	2079	utr3
NM_001001729	2241	2271	utr3
NM_001001729	2272	2301	utr3
NM_001001729	2302	2331	utr3
NM_001001729	2411	2439	utr3
NM_001001813	81	109	utr5
NM_001001813	81	109	cds
NM_001001813	131	161	cds
NM_001001813	162	191	cds
NM_001001813	231	261	cds
NM_001001813	262	291	cds
NM_001001813	291	319	cds
NM_001001813	461	489	cds
NM_001001813	551	581	cds
NM_001001813	582	611	cds
NM_001001813	631	661	cds
NM_001001813	662	691	cds
NM_001001813	821	851	utr3
NM_001001813	821	851	cds
NM_001001813	852	881	utr3
NM_001001813	941	971	utr3
NM_001001813	1011	1039	utr3
NM_001001813	1061	1091	utr3
NM_001001813	1092	1121	utr3
NM_001001813	1131	1161	utr3
NM_001001813	1181	1211	utr3
NM_001001813	1212	1241	utr3
NM_001001813	1241	1269	utr3
NM_001001818	291	319	utr5
NM_001001818	321	349	utr5
NM_001001818	391	419	utr5
NM_001001818	451	479	utr5
NM_001001818	521	551	utr5
NM_001001818	521	551	cds
NM_001001818	581	611	cds
NM_001001818	721	749	cds
NM_001001818	781	809	cds
NM_001001818	861	889	cds
NM_001001818	921	949	cds
NM_001001818	1031	1061	cds
NM_001001818	1062	1091	cds
NM_001001818	1111	1139	cds
NM_001001818	1181	1209	cds
NM_001001818	1281	1311	cds
NM_001001818	1312	1341	cds
NM_001001818	1351	1379	cds
NM_001001818	1401	1429	cds
NM_001001818	1441	1471	cds
NM_001001818	1671	1699	utr3
NM_001001818	1731	1759	utr3
NM_001001818	1761	1791	utr3
NM_001001818	1921	1949	utr3
NM_001001818	1961	1989	utr3
NM_001001818	2051	2079	utr3
NM_001001818	2081	2111	utr3
NM_001001818	2131	2159	utr3
NM_001001818	2341	2369	utr3
NM_001001819	21	49	cds
NM_001001819	61	89	cds
NM_001001819	121	151	cds
NM_001001819	161	189	cds
NM_001001819	201	229	cds
NM_001001819	271	301	cds
NM_001001819	391	419	cds
NM_001001819	441	469	utr3
NM_001001819	441	469	cds
NM_001001822	11	41	utr5
NM_001001822	42	71	utr5
NM_001001822	71	101	utr5
NM_001001822	191	221	utr5
NM_001001822	341	369	utr5
NM_001001822	421	451	utr5
NM_001001822	452	481	utr5
NM_001001822	481	511	utr5
NM_001001822	512	541	utr5
NM_001001822	621	649	cds
NM_001001822	841	869	cds
NM_001001822	901	929	cds
NM_001001822	941	969	cds
NM_001001822	981	1011	cds
NM_001001822	1071	1099	cds
NM_001001822	1131	1161	cds
NM_001001822	1162	1191	cds
NM_001001822	1251	1279	cds
NM_001001822	1281	1309	cds
NM_001001822	1331	1361	cds
NM_001001822	1362	1391	cds
NM_001001822	1481	1511	cds
NM_001001822	1512	1541	cds
NM_001001822	1601	1629	cds
NM_001001822	1681	1711	cds
NM_001001822	1712	1741	cds
NM_001001822	1741	1771	cds
NM_001001822	1871	1899	utr3
NM_001001822	1921	1949	utr3
NM_001001822	2161	2191	utr3
NM_001001822	2241	2271	utr3
NM_001001822	2272	2301	utr3
NM_001001822	2301	2329	utr3
NM_001001822	2421	2449	utr3
NM_001001822	2461	2489	utr3
NM_001001822	2501	2529	utr3
NM_001001823	21	51	utr5
NM_001001823	71	101	utr5
NM_001001823	111	141	utr5
NM_001001823	111	141	cds
NM_001001823	181	209	cds
NM_001001823	271	301	cds
NM_001001823	321	351	cds
NM_001001823	352	381	cds
NM_001001823	631	659	cds
NM_001001823	661	689	cds
NM_001001823	691	719	cds
NM_001001823	741	769	cds
NM_001001823	801	829	cds
NM_001001823	851	881	cds
NM_001001823	891	921	cds
NM_001001823	922	951	cds
NM_001001823	1151	1181	cds
NM_001001823	1241	1269	cds
NM_001001823	1401	1429	cds
NM_001001823	1491	1519	cds
NM_001001823	1581	1609	cds
NM_001001823	1651	1679	cds
NM_001001823	1681	1709	cds
NM_001001823	1741	1771	cds
NM_001001823	1772	1801	cds
NM_001001823	1921	1949	cds
NM_001001823	1961	1989	cds
NM_001001823	2291	2321	cds
NM_001001823	2322	2351	utr3
NM_001001823	2322	2351	cds
NM_001001823	2352	2381	utr3
NM_001001823	2391	2419	utr3
NM_001001823	2421	2449	utr3
NM_001001823	2451	2479	utr3
NM_001001823	2501	2529	utr3
NM_001001823	2561	2589	utr3
NM_001001828	511	539	cds
NM_001001828	581	611	cds
NM_001001828	661	691	cds
NM_001001828	692	721	cds
NM_001001828	731	761	cds
NM_001001828	762	791	cds
NM_001001828	791	819	cds
NM_001001828	841	869	cds
NM_001001828	881	911	cds
NM_001001828	921	951	cds
NM_001001828	1101	1131	cds
NM_001001828	1132	1161	cds
NM_001001828	1151	1181	utr3
NM_001001828	1151	1181	cds
NM_001001830	231	261	utr5
NM_001001830	262	291	utr5
NM_001001830	281	309	utr5
NM_001001830	351	381	utr5
NM_001001830	382	411	utr5
NM_001001830	431	459	utr5
NM_001001830	481	509	utr5
NM_001001830	481	509	cds
NM_001001830	641	669	cds
NM_001001830	841	869	cds
NM_001001830	881	909	cds
NM_001001830	961	989	cds
NM_001001830	1201	1229	cds
NM_001001830	1271	1299	cds
NM_001001830	1301	1329	cds
NM_001001830	1461	1489	cds
NM_001001830	1661	1689	utr3
NM_001001830	1721	1749	utr3
NM_001001830	1831	1859	utr3
NM_001001830	1891	1919	utr3
NM_001001830	2051	2081	utr3
NM_001001830	2082	2111	utr3
NM_001001830	2112	2141	utr3
NM_001001830	2241	2269	utr3
NM_001001830	2361	2391	utr3
NM_001001830	2981	3011	utr3
NM_001001830	3012	3041	utr3
NM_001001830	3051	3079	utr3
NM_001001830	3141	3169	utr3
NM_001001830	3321	3349	utr3
NM_001001830	3361	3389	utr3
NM_001001830	3431	3461	utr3
NM_001001830	3462	3491	utr3
NM_001001830	3511	3541	utr3
NM_001001830	3542	3571	utr3
NM_001001834	721	749	cds
NM_001001834	771	799	cds
NM_001001834	1151	1179	cds
NM_001001834	1801	1831	utr3
NM_001001836	261	289	cds
NM_001001836	541	569	cds
NM_001001836	611	641	cds
NM_001001836	642	671	cds
NM_001001836	781	809	cds
NM_001001836	1051	1079	cds
NM_001001836	1171	1199	cds
NM_001001836	1251	1279	cds
NM_001001836	1281	1309	cds
NM_001001836	1421	1449	cds
NM_001001836	1531	1559	utr3
NM_001001838	211	241	cds
NM_001001838	311	339	cds
NM_001001838	751	779	cds
NM_001001840	451	479	cds
NM_001001840	521	551	cds
NM_001001840	901	931	cds
NM_001001840	991	1019	cds
NM_001001840	1171	1201	cds
NM_001001840	1202	1231	cds
NM_001001840	1232	1261	cds
NM_001001840	1481	1511	cds
NM_001001840	1512	1541	cds
NM_001001840	1581	1609	cds
NM_001001840	1641	1671	cds
NM_001001840	1721	1749	cds
NM_001001840	1831	1859	cds
NM_001001840	2041	2069	cds
NM_001001840	2071	2099	cds
NM_001001840	2111	2139	cds
NM_001001840	2211	2239	cds
NM_001001840	2311	2339	cds
NM_001001840	2431	2459	cds
NM_001001840	2701	2729	cds
NM_001001840	2831	2861	cds
NM_001001840	2881	2909	cds
NM_001001840	3181	3209	utr3
NM_001001840	3251	3279	utr3
NM_001001840	3311	3341	utr3
NM_001001840	3381	3411	utr3
NM_001001840	3412	3441	utr3
NM_001001844	21	51	utr5
NM_001001844	52	81	utr5
NM_001001844	101	129	utr5
NM_001001844	151	181	cds
NM_001001844	201	229	cds
NM_001001844	311	339	cds
NM_001001844	351	379	cds
NM_001001844	391	419	cds
NM_001001844	431	461	cds
NM_001001844	511	541	cds
NM_001001844	542	571	cds
NM_001001844	711	739	cds
NM_001001844	751	781	cds
NM_001001844	782	811	cds
NM_001001844	812	841	cds
NM_001001844	901	929	cds
NM_001001844	971	1001	cds
NM_001001844	1002	1031	cds
NM_001001844	1171	1199	cds
NM_001001844	1231	1259	cds
NM_001001844	1301	1331	cds
NM_001001844	1332	1361	cds
NM_001001844	1371	1401	cds
NM_001001844	1402	1431	cds
NM_001001844	1432	1461	cds
NM_001001844	1461	1489	cds
NM_001001844	1511	1541	cds
NM_001001844	1542	1571	cds
NM_001001844	1572	1601	cds
NM_001001844	1681	1709	cds
NM_001001844	1721	1749	cds
NM_001001844	1761	1789	cds
NM_001001844	1801	1829	cds
NM_001001844	1841	1871	cds
NM_001001844	1921	1949	cds
NM_001001844	1981	2011	cds
NM_001001844	2012	2041	cds
NM_001001844	2041	2069	cds
NM_001001844	2081	2109	cds
NM_001001844	2191	2219	cds
NM_001001844	2241	2271	cds
NM_001001844	2272	2301	cds
NM_001001844	2311	2341	cds
NM_001001844	2411	2439	cds
NM_001001844	2441	2471	cds
NM_001001844	2472	2501	cds
NM_001001844	2521	2549	utr3
NM_001001844	2521	2549	cds
NM_001001844	2551	2579	utr3
NM_001001844	2601	2631	utr3
NM_001001844	2632	2661	utr3
NM_001001844	2681	2709	utr3
NM_001001844	2761	2789	utr3
NM_001001844	2801	2831	utr3
NM_001001844	2832	2861	utr3
NM_001001844	2941	2969	utr3
NM_001001844	3011	3041	utr3
NM_001001844	3042	3071	utr3
NM_001001844	3072	3101	utr3
NM_001001844	3141	3171	utr3
NM_001001844	3172	3201	utr3
NM_001001844	3291	3321	utr3
NM_001001844	3391	3419	utr3
NM_001001844	3441	3471	utr3
NM_001001844	3472	3501	utr3
NM_001001844	3511	3539	utr3
NM_001001844	3541	3569	utr3
NM_001001844	3681	3709	utr3
NM_001001844	3791	3821	utr3
NM_001001844	3822	3851	utr3
NM_001001844	3841	3869	utr3
NM_001001844	3891	3921	utr3
NM_001001844	3951	3979	utr3
NM_001001844	4011	4041	utr3
NM_001001844	4042	4071	utr3
NM_001001844	4101	4131	utr3
NM_001001844	4132	4161	utr3
NM_001001844	4162	4191	utr3
NM_001001844	4181	4209	utr3
NM_001001886	21	49	utr5
NM_001001886	181	211	cds
NM_001001886	321	349	cds
NM_001001886	351	379	cds
NM_001001886	391	421	cds
NM_001001886	422	451	cds
NM_001001886	561	591	cds
NM_001001886	651	679	cds
NM_001001886	691	719	cds
NM_001001886	741	771	cds
NM_001001886	821	849	cds
NM_001001886	851	881	cds
NM_001001886	882	911	cds
NM_001001886	921	949	cds
NM_001001886	1091	1119	cds
NM_001001886	1121	1149	cds
NM_001001886	1161	1191	cds
NM_001001886	1192	1221	cds
NM_001001886	1231	1259	cds
NM_001001886	1261	1289	cds
NM_001001886	1331	1359	cds
NM_001001886	1421	1449	cds
NM_001001886	1691	1719	cds
NM_001001886	1861	1889	cds
NM_001001886	2051	2079	cds
NM_001001886	2111	2141	cds
NM_001001886	2142	2171	cds
NM_001001886	2172	2201	cds
NM_001001886	2281	2309	cds
NM_001001886	2311	2341	cds
NM_001001886	2342	2371	cds
NM_001001886	2601	2629	cds
NM_001001886	2651	2679	cds
NM_001001886	2831	2859	cds
NM_001001886	2871	2901	cds
NM_001001886	2951	2979	cds
NM_001001886	3051	3079	cds
NM_001001886	3181	3209	cds
NM_001001886	3251	3281	cds
NM_001001886	3331	3359	cds
NM_001001886	3361	3391	utr3
NM_001001886	3361	3391	cds
NM_001001886	3392	3421	utr3
NM_001001886	3501	3529	utr3
NM_001001886	3571	3601	utr3
NM_001001886	3602	3631	utr3
NM_001001886	3651	3679	utr3
NM_001001886	3691	3719	utr3
NM_001001886	3721	3749	utr3
NM_001001886	3801	3829	utr3
NM_001001886	3901	3929	utr3
NM_001001889	1	31	utr5
NM_001001889	32	61	utr5
NM_001001889	62	91	utr5
NM_001001889	92	121	utr5
NM_001001889	122	151	utr5
NM_001001889	161	191	utr5
NM_001001889	161	191	cds
NM_001001889	192	221	cds
NM_001001889	222	251	cds
NM_001001889	252	281	cds
NM_001001889	282	311	cds
NM_001001889	312	341	cds
NM_001001889	342	371	cds
NM_001001889	381	411	cds
NM_001001889	412	441	cds
NM_001001889	451	481	cds
NM_001001889	482	511	cds
NM_001001889	621	651	cds
NM_001001889	652	681	cds
NM_001001889	751	779	cds
NM_001001889	901	929	cds
NM_001001889	951	981	cds
NM_001001889	982	1011	cds
NM_001001889	1051	1079	cds
NM_001001889	1141	1169	cds
NM_001001889	1171	1199	cds
NM_001001889	1261	1291	cds
NM_001001889	1331	1359	cds
NM_001001889	1551	1579	cds
NM_001001889	1591	1619	cds
NM_001001889	1661	1689	cds
NM_001001889	1721	1751	cds
NM_001001889	1752	1781	cds
NM_001001889	1781	1811	cds
NM_001001889	1812	1841	cds
NM_001001889	1842	1871	cds
NM_001001889	1931	1961	cds
NM_001001889	1971	2001	cds
NM_001001889	2191	2219	cds
NM_001001889	2221	2251	cds
NM_001001889	2261	2291	cds
NM_001001889	2292	2321	cds
NM_001001940	31	59	utr5
NM_001001940	61	91	utr5
NM_001001940	61	91	cds
NM_001001940	92	121	cds
NM_001001940	161	189	cds
NM_001001940	241	271	cds
NM_001001940	272	301	cds
NM_001001940	331	359	cds
NM_001001940	501	531	cds
NM_001001940	541	569	cds
NM_001001940	721	751	cds
NM_001001940	752	781	cds
NM_001001940	782	811	cds
NM_001001940	851	879	cds
NM_001001940	891	921	cds
NM_001001940	922	951	cds
NM_001001940	941	969	cds
NM_001001940	971	1001	cds
NM_001001940	1031	1061	cds
NM_001001940	1062	1091	cds
NM_001001940	1111	1141	cds
NM_001001940	1151	1179	cds
NM_001001940	1181	1209	cds
NM_001001940	1281	1311	cds
NM_001001940	1351	1379	cds
NM_001001940	1421	1449	cds
NM_001001940	1451	1479	cds
NM_001001940	1511	1539	cds
NM_001001940	1711	1741	cds
NM_001001940	1831	1859	cds
NM_001001940	1941	1969	cds
NM_001001940	2021	2049	cds
NM_001001940	2061	2091	cds
NM_001001940	2161	2189	cds
NM_001001940	2191	2221	cds
NM_001001940	2222	2251	cds
NM_001001940	2271	2301	cds
NM_001001940	2302	2331	cds
NM_001001940	2391	2421	cds
NM_001001940	2422	2451	cds
NM_001001940	2471	2501	cds
NM_001001940	2502	2531	cds
NM_001001940	2711	2741	cds
NM_001001940	2841	2869	cds
NM_001001940	2941	2971	utr3
NM_001001940	2991	3019	utr3
NM_001001940	3021	3051	utr3
NM_001001941	61	89	utr5
NM_001001941	91	119	utr5
NM_001001941	121	151	cds
NM_001001941	152	181	cds
NM_001001941	182	211	cds
NM_001001941	212	241	cds
NM_001001941	291	321	cds
NM_001001941	451	481	cds
NM_001001941	501	529	cds
NM_001001941	611	641	cds
NM_001001941	642	671	cds
NM_001001941	891	921	cds
NM_001001941	922	951	cds
NM_001001941	952	981	cds
NM_001001941	971	1001	cds
NM_001001941	1011	1041	cds
NM_001001941	1042	1071	cds
NM_001001941	1072	1101	cds
NM_001001941	1181	1211	cds
NM_001001941	1212	1241	cds
NM_001001941	1231	1261	cds
NM_001001941	1271	1301	cds
NM_001001941	1302	1331	cds
NM_001001941	1332	1361	cds
NM_001001941	1351	1381	cds
NM_001001941	1382	1411	cds
NM_001001941	1431	1459	cds
NM_001001941	1511	1541	cds
NM_001001941	1542	1571	cds
NM_001001941	1591	1619	cds
NM_001001941	1691	1719	cds
NM_001001941	1721	1751	cds
NM_001001941	1761	1789	cds
NM_001001941	1821	1849	cds
NM_001001941	1861	1891	cds
NM_001001941	1892	1921	cds
NM_001001941	1931	1959	cds
NM_001001941	2061	2089	cds
NM_001001941	2151	2181	cds
NM_001001941	2182	2211	cds
NM_001001941	2291	2321	cds
NM_001001941	2322	2351	cds
NM_001001941	2352	2381	cds
NM_001001941	2391	2419	cds
NM_001001941	2461	2491	cds
NM_001001941	2492	2521	cds
NM_001001941	2561	2591	cds
NM_001001941	2592	2621	cds
NM_001001941	2721	2749	cds
NM_001001941	2791	2821	cds
NM_001001941	2861	2889	cds
NM_001001941	3041	3071	cds
NM_001001941	3072	3101	cds
NM_001001941	3111	3141	cds
NM_001001941	3142	3171	cds
NM_001001941	3181	3209	cds
NM_001001941	3301	3329	cds
NM_001001941	3351	3379	cds
NM_001001941	3391	3421	cds
NM_001001941	3422	3451	cds
NM_001001941	3491	3521	cds
NM_001001941	3522	3551	cds
NM_001001941	3671	3699	cds
NM_001001941	3721	3749	cds
NM_001001941	3771	3799	utr3
NM_001001941	3771	3799	cds
NM_001001941	3841	3869	utr3
NM_001001941	3871	3901	utr3
NM_001001941	3911	3939	utr3
NM_001001941	3941	3971	utr3
NM_001001941	3972	4001	utr3
NM_001001941	4011	4041	utr3
NM_001001941	4042	4071	utr3
NM_001001943	181	209	cds
NM_001001943	241	269	cds
NM_001001943	271	299	cds
NM_001001943	321	349	cds
NM_001001943	371	399	cds
NM_001001943	431	459	cds
NM_001001943	481	509	cds
NM_001001943	511	539	cds
NM_001001943	771	799	cds
NM_001001943	931	959	cds
NM_001001943	1251	1281	cds
NM_001001943	1291	1319	cds
NM_001001943	1481	1511	cds
NM_001001943	1611	1639	cds
NM_001001943	1661	1691	cds
NM_001001943	1692	1721	cds
NM_001001943	1801	1831	cds
NM_001001943	1832	1861	cds
NM_001001943	1861	1889	cds
NM_001001943	1901	1931	cds
NM_001001943	2091	2121	cds
NM_001001943	2221	2251	cds
NM_001001943	2252	2281	cds
NM_001001943	2321	2349	cds
NM_001001943	2361	2389	utr3
NM_001001943	2361	2389	cds
NM_001001943	2391	2421	utr3
NM_001001943	2422	2451	utr3
NM_001001943	2451	2479	utr3
NM_001001943	2621	2651	utr3
NM_001001943	2701	2729	utr3
NM_001001943	2741	2771	utr3
NM_001001943	2861	2891	utr3
NM_001001943	2892	2921	utr3
NM_001001943	2991	3019	utr3
NM_001001943	3031	3059	utr3
NM_001001943	3071	3101	utr3
NM_001001943	3102	3131	utr3
NM_001001943	3131	3159	utr3
NM_001001943	3181	3211	utr3
NM_001001943	3251	3279	utr3
NM_001001943	3331	3361	utr3
NM_001001943	3362	3391	utr3
NM_001001943	3381	3411	utr3
NM_001001943	3412	3441	utr3
NM_001001943	3481	3511	utr3
NM_001001943	3512	3541	utr3
NM_001001943	3741	3769	utr3
NM_001001943	3941	3969	utr3
NM_001001943	4001	4029	utr3
NM_001001943	4041	4069	utr3
NM_001001943	4071	4101	utr3
NM_001001943	4102	4131	utr3
NM_001001943	4321	4351	utr3
NM_001001944	201	229	cds
NM_001001944	241	271	cds
NM_001001944	272	301	cds
NM_001001944	302	331	cds
NM_001001944	351	381	cds
NM_001001944	382	411	cds
NM_001001944	461	491	cds
NM_001001944	492	521	cds
NM_001001944	522	551	cds
NM_001001944	552	581	cds
NM_001001944	582	611	cds
NM_001001944	612	641	cds
NM_001001944	642	671	cds
NM_001001944	671	699	cds
NM_001001944	701	731	cds
NM_001001944	732	761	cds
NM_001001944	751	781	cds
NM_001001944	782	811	cds
NM_001001944	812	841	cds
NM_001001944	842	871	cds
NM_001001944	872	901	cds
NM_001001944	902	931	cds
NM_001001944	931	961	cds
NM_001001944	962	991	cds
NM_001001944	992	1021	cds
NM_001001944	1022	1051	cds
NM_001001944	1052	1081	cds
NM_001001944	1081	1109	cds
NM_001001944	1241	1271	cds
NM_001001944	1272	1301	cds
NM_001001944	1341	1371	cds
NM_001001944	1372	1401	cds
NM_001001944	1411	1439	cds
NM_001001944	1441	1471	cds
NM_001001944	1472	1501	cds
NM_001001944	1511	1541	cds
NM_001001944	1542	1571	cds
NM_001001944	1561	1589	cds
NM_001001944	1651	1681	cds
NM_001001944	1682	1711	cds
NM_001001944	1721	1751	cds
NM_001001944	1791	1821	cds
NM_001001944	1822	1851	cds
NM_001001944	1852	1881	cds
NM_001001944	1951	1979	cds
NM_001001944	1981	2011	cds
NM_001001944	2012	2041	cds
NM_001001944	2041	2071	cds
NM_001001944	2072	2101	cds
NM_001001944	2161	2189	cds
NM_001001944	2291	2321	cds
NM_001001944	2331	2359	cds
NM_001001944	2371	2401	cds
NM_001001944	2402	2431	cds
NM_001001944	2432	2461	cds
NM_001001944	2461	2489	cds
NM_001001944	2521	2551	cds
NM_001001944	2552	2581	cds
NM_001001944	2582	2611	cds
NM_001001944	2612	2641	cds
NM_001001944	2641	2671	cds
NM_001001944	2801	2831	cds
NM_001001944	2901	2931	cds
NM_001001944	2932	2961	cds
NM_001001944	2962	2991	cds
NM_001001944	3021	3049	cds
NM_001001944	3131	3159	utr3
NM_001001944	3201	3229	utr3
NM_001001944	3231	3259	utr3
NM_001001944	3331	3359	utr3
NM_001001944	3441	3469	utr3
NM_001001944	3521	3549	utr3
NM_001001944	3751	3779	utr3
NM_001001944	3861	3891	utr3
NM_001001944	3901	3929	utr3
NM_001001944	3991	4019	utr3
NM_001001948	11	39	cds
NM_001001948	61	89	cds
NM_001001948	141	169	cds
NM_001001948	201	231	cds
NM_001001948	232	261	cds
NM_001001948	351	379	cds
NM_001001948	541	569	cds
NM_001001948	661	689	cds
NM_001001948	781	811	cds
NM_001001948	812	841	cds
NM_001001948	951	981	cds
NM_001001948	1011	1041	cds
NM_001001948	1071	1099	cds
NM_001001948	1101	1131	cds
NM_001001948	1132	1161	cds
NM_001001948	1171	1199	cds
NM_001001948	1261	1289	cds
NM_001001948	1341	1369	cds
NM_001001948	1401	1431	cds
NM_001001948	1432	1461	cds
NM_001001948	1521	1549	cds
NM_001001951	31	59	cds
NM_001001951	71	101	cds
NM_001001951	102	131	cds
NM_001001951	201	229	cds
NM_001001951	301	331	cds
NM_001001951	401	431	cds
NM_001001951	432	461	cds
NM_001001951	521	549	cds
NM_001001951	671	699	cds
NM_001001951	1031	1059	cds
NM_001001951	1181	1209	cds
NM_001001951	1211	1239	cds
NM_001001951	1431	1459	cds
NM_001001951	1521	1549	utr3
NM_001001951	1521	1549	cds
NM_001001951	1581	1609	utr3
NM_001001951	1651	1679	utr3
NM_001001951	1901	1931	utr3
NM_001001951	1932	1961	utr3
NM_001001951	2081	2111	utr3
NM_001002013	81	109	utr5
NM_001002013	81	109	cds
NM_001002013	181	209	cds
NM_001002013	211	239	cds
NM_001002013	411	441	cds
NM_001002013	442	471	cds
NM_001002013	472	501	cds
NM_001002013	502	531	cds
NM_001002013	532	561	cds
NM_001002013	551	579	cds
NM_001002013	591	621	cds
NM_001002013	622	651	cds
NM_001002013	652	681	cds
NM_001002013	682	711	cds
NM_001002013	791	821	cds
NM_001002013	822	851	cds
NM_001002013	901	931	cds
NM_001002013	932	961	cds
NM_001002013	1071	1099	cds
NM_001002013	1121	1149	cds
NM_001002013	1161	1191	cds
NM_001002013	1211	1239	cds
NM_001002013	1331	1361	cds
NM_001002013	1362	1391	cds
NM_001002013	1392	1421	cds
NM_001002013	1411	1441	cds
NM_001002013	1551	1579	cds
NM_001002013	1631	1659	cds
NM_001002013	1661	1691	cds
NM_001002013	1751	1779	cds
NM_001002013	1811	1839	cds
NM_001002013	1981	2009	cds
NM_001002013	2011	2041	cds
NM_001002013	2042	2071	cds
NM_001002013	2071	2099	cds
NM_001002013	2161	2189	cds
NM_001002013	2201	2229	cds
NM_001002013	2251	2279	cds
NM_001002013	2411	2439	cds
NM_001002013	2461	2489	cds
NM_001002013	2531	2559	cds
NM_001002013	2631	2659	cds
NM_001002013	2701	2731	cds
NM_001002013	2741	2769	cds
NM_001002013	2841	2869	cds
NM_001002013	2941	2971	utr3
NM_001002013	2941	2971	cds
NM_001002013	2972	3001	utr3
NM_001002013	3041	3071	utr3
NM_001002013	3072	3101	utr3
NM_001002013	3191	3219	utr3
NM_001002037	11	39	utr5
NM_001002037	51	79	utr5
NM_001002037	51	79	cds
NM_001002037	101	131	cds
NM_001002037	132	161	cds
NM_001002037	261	289	cds
NM_001002037	291	319	cds
NM_001002037	411	439	cds
NM_001002037	471	501	cds
NM_001002037	511	539	cds
NM_001002037	641	671	cds
NM_001002037	672	701	cds
NM_001002037	731	759	cds
NM_001002037	761	791	cds
NM_001002037	792	821	cds
NM_001002037	821	851	cds
NM_001002037	891	921	cds
NM_001002037	922	951	cds
NM_001002037	1151	1179	cds
NM_001002037	1251	1279	cds
NM_001002037	1301	1331	cds
NM_001002037	1332	1361	cds
NM_001002037	1371	1401	cds
NM_001002037	1402	1431	cds
NM_001002037	1431	1461	cds
NM_001002037	1462	1491	cds
NM_001002037	1491	1519	cds
NM_001002037	1521	1551	cds
NM_001002037	1552	1581	cds
NM_001002037	1671	1699	cds
NM_001002037	1751	1781	cds
NM_001002037	1861	1889	cds
NM_001002037	1911	1941	cds
NM_001002037	2011	2039	cds
NM_001002041	51	79	utr5
NM_001002041	171	199	cds
NM_001002041	211	239	cds
NM_001002041	351	379	cds
NM_001002041	501	531	cds
NM_001002041	532	561	cds
NM_001002041	611	641	cds
NM_001002041	731	759	cds
NM_001002041	821	849	cds
NM_001002041	881	909	cds
NM_001002041	1051	1079	cds
NM_001002041	1091	1121	cds
NM_001002041	1122	1151	cds
NM_001002041	1151	1181	cds
NM_001002041	1182	1211	cds
NM_001002041	1251	1279	cds
NM_001002041	1311	1341	cds
NM_001002041	1342	1371	cds
NM_001002041	1381	1409	cds
NM_001002041	1531	1561	cds
NM_001002041	1611	1639	cds
NM_001002041	1771	1799	cds
NM_001002041	1801	1829	cds
NM_001002041	2251	2281	cds
NM_001002041	2311	2339	cds
NM_001002041	2341	2371	cds
NM_001002041	2372	2401	utr3
NM_001002041	2372	2401	cds
NM_001002041	2481	2511	utr3
NM_001002041	2512	2541	utr3
NM_001002042	511	539	cds
NM_001002042	901	929	cds
NM_001002042	1161	1189	cds
NM_001002042	1201	1231	cds
NM_001002042	1521	1549	cds
NM_001002042	1811	1839	cds
NM_001002042	1961	1991	cds
NM_001002042	1992	2021	cds
NM_001002042	2021	2049	cds
NM_001002042	2071	2099	cds
NM_001002042	2101	2129	cds
NM_001002042	2151	2181	cds
NM_001002042	2241	2269	cds
NM_001002042	2321	2351	cds
NM_001002042	2352	2381	cds
NM_001002042	2511	2539	cds
NM_001002042	2711	2739	cds
NM_001002042	2821	2851	cds
NM_001002042	2911	2941	cds
NM_001002042	2942	2971	cds
NM_001002042	3081	3111	cds
NM_001002042	3121	3149	cds
NM_001002042	3261	3289	cds
NM_001002042	3291	3321	cds
NM_001002042	3322	3351	cds
NM_001002042	3341	3369	cds
NM_001002042	3401	3429	cds
NM_001002042	3471	3501	cds
NM_001002042	3502	3531	cds
NM_001002042	3621	3649	cds
NM_001002042	3711	3741	cds
NM_001002042	3742	3771	cds
NM_001002042	3811	3839	utr3
NM_001002042	3811	3839	cds
NM_001002046	121	149	cds
NM_001002046	181	209	cds
NM_001002046	331	359	cds
NM_001002046	461	489	utr3
NM_001002046	521	549	utr3
NM_001002047	41	69	utr5
NM_001002047	201	231	cds
NM_001002047	232	261	cds
NM_001002047	262	291	cds
NM_001002047	311	341	cds
NM_001002047	342	371	cds
NM_001002047	421	451	cds
NM_001002047	452	481	cds
NM_001002047	471	499	cds
NM_001002047	611	641	cds
NM_001002047	681	711	utr3
NM_001002047	681	711	cds
NM_001002047	712	741	utr3
NM_001002047	861	889	utr3
NM_001002047	901	931	utr3
NM_001002047	991	1021	utr3
NM_001002047	1022	1051	utr3
NM_001002050	21	51	utr5
NM_001002050	52	81	utr5
NM_001002050	82	111	utr5
NM_001002050	111	139	utr5
NM_001002050	181	211	utr5
NM_001002050	221	251	utr5
NM_001002050	221	251	cds
NM_001002050	252	281	cds
NM_001002050	282	311	cds
NM_001002050	312	341	cds
NM_001002050	391	421	cds
NM_001002050	422	451	cds
NM_001002050	452	481	cds
NM_001002050	482	511	cds
NM_001002050	511	541	cds
NM_001002050	542	571	cds
NM_001002050	572	601	cds
NM_001002050	631	659	cds
NM_001002050	711	741	cds
NM_001002050	742	771	cds
NM_001002050	772	801	cds
NM_001002050	861	889	cds
NM_001002050	891	919	cds
NM_001002050	951	979	utr3
NM_001002050	951	979	cds
NM_001002050	1071	1099	utr3
NM_001002051	101	131	utr5
NM_001002051	132	161	cds
NM_001002051	161	191	cds
NM_001002051	192	221	cds
NM_001002051	211	239	cds
NM_001002051	281	311	cds
NM_001002051	321	351	cds
NM_001002051	352	381	cds
NM_001002051	382	411	cds
NM_001002051	461	491	cds
NM_001002051	492	521	cds
NM_001002051	522	551	cds
NM_001002051	591	621	cds
NM_001002051	622	651	cds
NM_001002051	671	699	cds
NM_001002051	711	739	cds
NM_001002051	841	869	cds
NM_001002051	881	909	cds
NM_001002051	951	979	utr3
NM_001002051	1111	1139	utr3
NM_001002051	1261	1291	utr3
NM_001002051	1391	1421	utr3
NM_001002051	1422	1451	utr3
NM_001002051	1452	1481	utr3
NM_001002051	1482	1511	utr3
NM_001002051	1501	1529	utr3
NM_001002051	1541	1569	utr3
NM_001002051	1661	1689	utr3
NM_001002053	41	71	utr5
NM_001002053	72	101	utr5
NM_001002053	121	149	utr5
NM_001002053	121	149	cds
NM_001002053	161	191	cds
NM_001002053	192	221	cds
NM_001002053	371	401	cds
NM_001002053	402	431	cds
NM_001002053	461	489	cds
NM_001002053	651	681	utr3
NM_001002053	651	681	cds
NM_001002053	682	711	utr3
NM_001002053	741	771	utr3
NM_001002053	781	809	utr3
NM_001002053	931	961	utr3
NM_001002055	11	39	utr5
NM_001002055	11	39	cds
NM_001002055	141	169	cds
NM_001002055	211	239	cds
NM_001002055	251	279	cds
NM_001002055	311	341	cds
NM_001002055	342	371	cds
NM_001002055	381	409	cds
NM_001002055	411	439	cds
NM_001002055	561	591	cds
NM_001002055	592	621	cds
NM_001002055	641	671	cds
NM_001002055	741	769	cds
NM_001002055	771	799	cds
NM_001002055	801	829	cds
NM_001002055	851	881	cds
NM_001002055	882	911	cds
NM_001002055	911	941	cds
NM_001002055	942	971	cds
NM_001002055	1001	1029	cds
NM_001002055	1051	1079	cds
NM_001002055	1161	1191	cds
NM_001002055	1192	1221	cds
NM_001002055	1361	1389	utr3
NM_001002055	1361	1389	cds
NM_001002055	1391	1419	utr3
NM_001002055	1511	1539	utr3
NM_001002055	1541	1571	utr3
NM_001002055	1572	1601	utr3
NM_001002055	1611	1639	utr3
NM_001002055	1661	1689	utr3
NM_001002055	1701	1729	utr3
NM_001002055	1741	1769	utr3
NM_001002055	1791	1821	utr3
NM_001002055	1831	1859	utr3
NM_001002056	31	61	utr5
NM_001002056	62	91	utr5
NM_001002056	62	91	cds
NM_001002056	101	131	cds
NM_001002056	191	219	cds
NM_001002056	241	269	cds
NM_001002056	321	349	cds
NM_001002056	381	409	cds
NM_001002056	441	469	cds
NM_001002056	501	531	cds
NM_001002056	711	739	cds
NM_001002056	741	769	cds
NM_001002056	801	831	cds
NM_001002056	832	861	cds
NM_001002056	862	891	cds
NM_001002056	921	949	cds
NM_001002056	961	989	cds
NM_001002056	1031	1059	cds
NM_001002056	1081	1109	cds
NM_001002056	1111	1139	cds
NM_001002056	1171	1199	cds
NM_001002056	1211	1241	cds
NM_001002056	1242	1271	cds
NM_001002056	1311	1341	cds
NM_001002056	1342	1371	cds
NM_001002057	31	59	utr5
NM_001002057	141	169	cds
NM_001002057	231	259	cds
NM_001002057	271	299	cds
NM_001002057	301	329	cds
NM_001002057	401	429	cds
NM_001002057	471	501	cds
NM_001002057	511	539	cds
NM_001002057	551	579	cds
NM_001002057	591	619	cds
NM_001002057	721	751	cds
NM_001002057	771	799	cds
NM_001002057	811	839	cds
NM_001002057	871	899	cds
NM_001002057	961	989	utr3
NM_001002057	961	989	cds
NM_001002058	11	41	utr5
NM_001002058	42	71	utr5
NM_001002058	72	101	utr5
NM_001002058	91	121	utr5
NM_001002058	122	151	utr5
NM_001002058	151	181	utr5
NM_001002058	151	181	cds
NM_001002058	182	211	cds
NM_001002058	212	241	cds
NM_001002058	242	271	cds
NM_001002058	272	301	cds
NM_001002058	331	361	cds
NM_001002058	371	399	cds
NM_001002058	411	439	cds
NM_001002058	461	491	cds
NM_001002058	492	521	cds
NM_001002058	531	561	cds
NM_001002058	591	619	cds
NM_001002058	691	721	cds
NM_001002058	722	751	cds
NM_001002058	752	781	cds
NM_001002058	782	811	cds
NM_001002058	831	861	cds
NM_001002058	921	949	cds
NM_001002058	1001	1029	cds
NM_001002058	1061	1091	cds
NM_001002058	1171	1199	cds
NM_001002058	1231	1261	utr3
NM_001002058	1262	1291	utr3
NM_001002058	1292	1321	utr3
NM_001002058	1322	1351	utr3
NM_001002058	1352	1381	utr3
NM_001002061	81	111	utr5
NM_001002061	112	141	utr5
NM_001002061	151	181	utr5
NM_001002061	182	211	utr5
NM_001002061	212	241	utr5
NM_001002061	212	241	cds
NM_001002061	242	271	cds
NM_001002061	271	299	cds
NM_001002061	311	339	cds
NM_001002061	421	449	cds
NM_001002061	461	489	cds
NM_001002061	761	789	cds
NM_001002061	811	839	utr3
NM_001002061	861	889	utr3
NM_001002061	911	939	utr3
NM_001002061	1021	1049	utr3
NM_001002061	1101	1129	utr3
NM_001002063	71	101	utr5
NM_001002063	102	131	utr5
NM_001002063	132	161	utr5
NM_001002063	171	199	utr5
NM_001002063	361	389	cds
NM_001002063	471	499	cds
NM_001002063	511	539	cds
NM_001002063	551	579	cds
NM_001002063	591	621	cds
NM_001002063	622	651	cds
NM_001002063	652	681	cds
NM_001002063	671	701	cds
NM_001002063	702	731	cds
NM_001002063	911	939	cds
NM_001002063	941	969	cds
NM_001002063	1001	1029	cds
NM_001002063	1141	1169	cds
NM_001002063	1251	1281	cds
NM_001002063	1521	1549	cds
NM_001002063	1611	1639	cds
NM_001002063	1701	1729	cds
NM_001002063	1731	1759	cds
NM_001002063	1761	1789	cds
NM_001002063	1911	1941	cds
NM_001002064	241	271	cds
NM_001002064	281	311	cds
NM_001002064	331	359	cds
NM_001002064	411	439	cds
NM_001002064	471	499	cds
NM_001002064	561	591	cds
NM_001002064	721	751	cds
NM_001002064	752	781	cds
NM_001002064	831	861	cds
NM_001002064	862	891	cds
NM_001002064	901	929	cds
NM_001002064	931	961	cds
NM_001002064	962	991	cds
NM_001002064	1191	1219	cds
NM_001002064	1251	1279	cds
NM_001002064	1321	1351	cds
NM_001002064	1352	1381	utr3
NM_001002064	1352	1381	cds
NM_001002065	131	161	cds
NM_001002065	241	271	cds
NM_001002065	272	301	cds
NM_001002065	361	389	cds
NM_001002065	391	419	cds
NM_001002065	431	461	cds
NM_001002065	591	619	cds
NM_001002065	631	659	cds
NM_001002065	771	801	cds
NM_001002065	871	899	cds
NM_001002065	951	981	cds
NM_001002065	1001	1031	cds
NM_001002065	1032	1061	cds
NM_001002065	1181	1211	utr3
NM_001002065	1181	1211	cds
NM_001002065	1212	1241	utr3
NM_001002065	1261	1289	utr3
NM_001002065	1541	1571	utr3
NM_001002065	1572	1601	utr3
NM_001002067	41	71	utr5
NM_001002067	72	101	utr5
NM_001002067	102	131	utr5
NM_001002067	281	311	cds
NM_001002067	312	341	cds
NM_001002067	421	451	cds
NM_001002067	452	481	cds
NM_001002067	491	519	cds
NM_001002067	521	551	utr3
NM_001002067	521	551	cds
NM_001002067	701	729	utr3
NM_001002068	1	31	utr5
NM_001002068	32	61	utr5
NM_001002068	61	91	utr5
NM_001002068	61	91	cds
NM_001002068	92	121	cds
NM_001002068	111	139	cds
NM_001002068	141	171	cds
NM_001002068	221	249	cds
NM_001002068	261	291	cds
NM_001002068	292	321	cds
NM_001002068	331	361	cds
NM_001002068	381	411	utr3
NM_001002068	381	411	cds
NM_001002068	471	501	utr3
NM_001002068	502	531	utr3
NM_001002068	591	619	utr3
NM_001002068	621	651	utr3
NM_001002068	652	681	utr3
NM_001002069	1	29	utr5
NM_001002069	1	29	cds
NM_001002069	101	129	cds
NM_001002069	171	201	cds
NM_001002069	231	259	cds
NM_001002069	271	301	cds
NM_001002069	302	331	utr3
NM_001002069	302	331	cds
NM_001002070	11	41	utr5
NM_001002070	42	71	utr5
NM_001002070	42	71	cds
NM_001002070	72	101	cds
NM_001002070	102	131	cds
NM_001002070	132	161	cds
NM_001002070	191	221	cds
NM_001002070	251	281	cds
NM_001002070	282	311	cds
NM_001002070	312	341	cds
NM_001002070	461	491	cds
NM_001002070	492	521	cds
NM_001002070	531	559	cds
NM_001002070	591	619	cds
NM_001002070	701	729	cds
NM_001002070	781	811	cds
NM_001002070	911	939	cds
NM_001002070	1001	1031	cds
NM_001002070	1032	1061	cds
NM_001002070	1051	1079	cds
NM_001002070	1131	1161	cds
NM_001002070	1162	1191	cds
NM_001002070	1192	1221	cds
NM_001002071	21	49	cds
NM_001002071	101	131	cds
NM_001002071	181	209	cds
NM_001002071	251	279	cds
NM_001002071	331	361	cds
NM_001002071	362	391	cds
NM_001002071	421	451	cds
NM_001002071	511	541	cds
NM_001002071	551	581	cds
NM_001002071	611	639	cds
NM_001002071	721	749	cds
NM_001002071	811	841	cds
NM_001002071	842	871	cds
NM_001002071	1021	1049	cds
NM_001002072	11	41	utr5
NM_001002072	42	71	cds
NM_001002072	72	101	cds
NM_001002072	111	141	cds
NM_001002072	142	171	cds
NM_001002072	181	211	cds
NM_001002072	212	241	cds
NM_001002072	242	271	cds
NM_001002072	281	311	cds
NM_001002072	312	341	cds
NM_001002072	361	391	cds
NM_001002072	392	421	cds
NM_001002072	441	471	cds
NM_001002072	481	509	utr3
NM_001002072	481	509	cds
NM_001002072	581	609	utr3
NM_001002072	641	669	utr3
NM_001002072	701	729	utr3
NM_001002072	851	881	utr3
NM_001002072	901	929	utr3
NM_001002072	941	971	utr3
NM_001002072	972	1001	utr3
NM_001002072	1002	1031	utr3
NM_001002072	1051	1079	utr3
NM_001002072	1081	1111	utr3
NM_001002072	1112	1141	utr3
NM_001002073	41	71	utr5
NM_001002073	72	101	utr5
NM_001002073	211	239	cds
NM_001002073	271	301	cds
NM_001002073	302	331	cds
NM_001002073	381	409	cds
NM_001002073	481	511	utr3
NM_001002073	512	541	utr3
NM_001002073	561	589	utr3
NM_001002073	691	719	utr3
NM_001002073	721	749	utr3
NM_001002073	771	799	utr3
NM_001002073	801	831	utr3
NM_001002073	841	871	utr3
NM_001002073	872	901	utr3
NM_001002073	1081	1109	utr3
NM_001002073	1111	1139	utr3
NM_001002073	1141	1171	utr3
NM_001002073	1172	1201	utr3
NM_001002077	11	39	utr5
NM_001002077	41	69	utr5
NM_001002077	91	121	utr5
NM_001002077	91	121	cds
NM_001002077	122	151	cds
NM_001002077	261	291	cds
NM_001002077	331	359	utr3
NM_001002077	331	359	cds
NM_001002077	361	389	utr3
NM_001002078	331	359	utr3
NM_001002079	191	219	cds
NM_001002079	221	251	cds
NM_001002079	252	281	cds
NM_001002079	281	311	cds
NM_001002079	351	379	cds
NM_001002079	391	419	cds
NM_001002080	1871	1899	cds
NM_001002080	1911	1939	cds
NM_001002080	2231	2261	cds
NM_001002080	2451	2481	cds
NM_001002080	2501	2531	cds
NM_001002080	2541	2569	cds
NM_001002080	2591	2621	cds
NM_001002080	2622	2651	cds
NM_001002080	2661	2689	cds
NM_001002080	2701	2731	cds
NM_001002080	2741	2771	cds
NM_001002080	2801	2831	cds
NM_001002080	2832	2861	cds
NM_001002080	2961	2991	cds
NM_001002080	2992	3021	cds
NM_001002080	3022	3051	cds
NM_001002080	3151	3181	cds
NM_001002080	3182	3211	cds
NM_001002080	3261	3289	cds
NM_001002080	3291	3321	cds
NM_001002080	3351	3379	cds
NM_001002081	81	111	cds
NM_001002081	112	141	cds
NM_001002081	142	171	cds
NM_001002081	172	201	cds
NM_001002081	201	229	cds
NM_001002081	301	329	cds
NM_001002081	341	371	cds
NM_001002081	372	401	cds
NM_001002081	402	431	cds
NM_001002081	451	481	utr3
NM_001002081	482	511	utr3
NM_001002081	501	531	utr3
NM_001002082	11	41	utr5
NM_001002082	42	71	utr5
NM_001002082	42	71	cds
NM_001002082	72	101	cds
NM_001002082	91	121	cds
NM_001002082	122	151	cds
NM_001002082	152	181	cds
NM_001002082	191	221	cds
NM_001002082	222	251	cds
NM_001002082	251	281	cds
NM_001002082	331	359	cds
NM_001002082	391	419	cds
NM_001002082	421	451	cds
NM_001002082	452	481	cds
NM_001002082	482	511	cds
NM_001002082	511	539	cds
NM_001002082	641	671	utr3
NM_001002082	672	701	utr3
NM_001002082	711	741	utr3
NM_001002082	742	771	utr3
NM_001002082	791	821	utr3
NM_001002082	822	851	utr3
NM_001002082	852	881	utr3
NM_001002082	882	911	utr3
NM_001002083	201	229	cds
NM_001002083	391	421	cds
NM_001002083	422	451	cds
NM_001002083	661	691	cds
NM_001002083	692	721	cds
NM_001002083	711	739	cds
NM_001002083	811	841	utr3
NM_001002083	842	871	utr3
NM_001002083	961	991	utr3
NM_001002083	1001	1031	utr3
NM_001002083	1032	1061	utr3
NM_001002084	21	49	utr5
NM_001002084	21	49	cds
NM_001002084	61	89	cds
NM_001002084	341	369	cds
NM_001002084	551	581	cds
NM_001002084	621	649	cds
NM_001002084	721	749	cds
NM_001002084	751	781	cds
NM_001002084	782	811	utr3
NM_001002084	782	811	cds
NM_001002084	821	849	utr3
NM_001002084	861	889	utr3
NM_001002084	951	979	utr3
NM_001002084	1001	1031	utr3
NM_001002084	1032	1061	utr3
NM_001002084	1091	1121	utr3
NM_001002086	101	131	utr5
NM_001002086	132	161	utr5
NM_001002086	132	161	cds
NM_001002086	181	211	cds
NM_001002086	261	291	cds
NM_001002086	292	321	cds
NM_001002086	322	351	cds
NM_001002086	361	389	cds
NM_001002086	411	439	cds
NM_001002086	631	659	cds
NM_001002086	671	701	cds
NM_001002086	702	731	cds
NM_001002086	732	761	cds
NM_001002086	751	781	cds
NM_001002086	782	811	utr3
NM_001002086	782	811	cds
NM_001002086	851	881	utr3
NM_001002086	882	911	utr3
NM_001002086	912	941	utr3
NM_001002086	931	959	utr3
NM_001002086	971	1001	utr3
NM_001002086	1061	1091	utr3
NM_001002086	1092	1121	utr3
NM_001002086	1221	1251	utr3
NM_001002086	1252	1281	utr3
NM_001002086	1301	1329	utr3
NM_001002086	1341	1369	utr3
NM_001002087	161	189	cds
NM_001002087	201	231	cds
NM_001002087	361	389	cds
NM_001002087	401	429	cds
NM_001002087	521	549	cds
NM_001002087	571	599	cds
NM_001002087	631	659	cds
NM_001002087	731	759	cds
NM_001002087	771	799	cds
NM_001002087	811	839	cds
NM_001002087	1141	1169	cds
NM_001002087	1231	1261	cds
NM_001002087	1262	1291	cds
NM_001002087	1311	1339	cds
NM_001002087	1421	1449	cds
NM_001002087	1531	1561	utr3
NM_001002087	1591	1619	utr3
NM_001002087	1801	1831	utr3
NM_001002087	1881	1911	utr3
NM_001002087	1912	1941	utr3
NM_001002089	21	51	utr5
NM_001002089	101	129	utr5
NM_001002089	151	181	utr5
NM_001002089	182	211	utr5
NM_001002089	221	251	utr5
NM_001002089	252	281	utr5
NM_001002089	331	359	cds
NM_001002089	371	399	cds
NM_001002089	491	521	cds
NM_001002089	522	551	cds
NM_001002089	552	581	cds
NM_001002089	651	679	cds
NM_001002089	701	729	cds
NM_001002089	781	809	cds
NM_001002089	841	869	cds
NM_001002089	911	939	cds
NM_001002089	1001	1029	cds
NM_001002089	1051	1081	cds
NM_001002089	1111	1139	cds
NM_001002089	1181	1211	cds
NM_001002089	1221	1249	cds
NM_001002089	1411	1439	cds
NM_001002089	1451	1479	utr3
NM_001002089	1451	1479	cds
NM_001002089	1531	1559	utr3
NM_001002089	1721	1749	utr3
NM_001002089	1801	1829	utr3
NM_001002091	151	181	cds
NM_001002091	241	269	cds
NM_001002091	391	419	cds
NM_001002091	591	619	cds
NM_001002091	691	721	cds
NM_001002091	871	901	cds
NM_001002091	902	931	cds
NM_001002091	932	961	cds
NM_001002091	991	1021	cds
NM_001002091	1022	1051	cds
NM_001002091	1081	1111	cds
NM_001002091	1112	1141	cds
NM_001002091	1141	1169	cds
NM_001002091	1241	1269	cds
NM_001002091	1281	1311	cds
NM_001002091	1312	1341	cds
NM_001002091	1342	1371	utr3
NM_001002091	1342	1371	cds
NM_001002091	1372	1401	utr3
NM_001002096	281	309	cds
NM_001002096	311	339	cds
NM_001002096	511	539	cds
NM_001002096	711	739	cds
NM_001002096	781	809	cds
NM_001002096	871	899	cds
NM_001002096	921	949	utr3
NM_001002096	981	1009	utr3
NM_001002096	1031	1059	utr3
NM_001002096	1101	1129	utr3
NM_001002096	1201	1229	utr3
NM_001002096	1241	1269	utr3
NM_001002096	1361	1389	utr3
NM_001002096	1411	1441	utr3
NM_001002096	1442	1471	utr3
NM_001002096	1471	1499	utr3
NM_001002097	11	39	utr5
NM_001002097	11	39	cds
NM_001002097	101	129	cds
NM_001002097	181	209	cds
NM_001002097	261	289	utr3
NM_001002097	361	391	utr3
NM_001002097	392	421	utr3
NM_001002097	421	449	utr3
NM_001002097	471	499	utr3
NM_001002097	581	609	utr3
NM_001002097	771	799	utr3
NM_001002097	821	849	utr3
NM_001002099	71	101	utr5
NM_001002099	111	139	utr5
NM_001002099	111	139	cds
NM_001002099	171	201	cds
NM_001002099	291	319	cds
NM_001002099	361	389	cds
NM_001002099	401	429	cds
NM_001002099	491	519	cds
NM_001002099	591	619	cds
NM_001002099	661	689	cds
NM_001002099	691	721	cds
NM_001002099	722	751	cds
NM_001002099	751	781	cds
NM_001002099	782	811	cds
NM_001002099	812	841	cds
NM_001002099	851	879	cds
NM_001002099	1041	1071	utr3
NM_001002099	1041	1071	cds
NM_001002099	1241	1269	utr3
NM_001002099	1401	1429	utr3
NM_001002099	1431	1459	utr3
NM_001002099	1551	1579	utr3
NM_001002099	1591	1621	utr3
NM_001002099	1622	1651	utr3
NM_001002104	1	31	utr5
NM_001002104	32	61	utr5
NM_001002104	32	61	cds
NM_001002104	71	101	cds
NM_001002104	102	131	cds
NM_001002104	171	201	cds
NM_001002104	261	289	cds
NM_001002104	331	359	cds
NM_001002104	411	439	cds
NM_001002104	451	479	cds
NM_001002104	531	559	cds
NM_001002104	601	629	cds
NM_001002104	651	681	cds
NM_001002104	691	719	cds
NM_001002104	831	859	cds
NM_001002104	861	891	cds
NM_001002104	921	949	cds
NM_001002104	971	999	utr3
NM_001002104	971	999	cds
NM_001002104	1031	1059	utr3
NM_001002104	1091	1119	utr3
NM_001002104	1141	1169	utr3
NM_001002104	1281	1309	utr3
NM_001002104	1311	1341	utr3
NM_001002104	1361	1389	utr3
NM_001002104	1431	1459	utr3
NM_001002104	1491	1519	utr3
NM_001002104	1521	1551	utr3
NM_001002105	81	109	utr5
NM_001002105	81	109	cds
NM_001002105	171	199	cds
NM_001002105	251	281	cds
NM_001002105	321	349	cds
NM_001002105	361	389	cds
NM_001002105	421	451	cds
NM_001002105	452	481	cds
NM_001002105	541	571	cds
NM_001002105	591	621	cds
NM_001002105	622	651	cds
NM_001002105	661	691	cds
NM_001002105	791	819	cds
NM_001002105	821	849	cds
NM_001002105	1081	1109	cds
NM_001002105	1141	1169	cds
NM_001002105	1181	1211	cds
NM_001002105	1212	1241	cds
NM_001002105	1242	1271	cds
NM_001002105	1511	1539	cds
NM_001002106	21	49	utr5
NM_001002106	51	79	utr5
NM_001002106	161	191	cds
NM_001002106	192	221	cds
NM_001002106	251	279	cds
NM_001002106	291	319	cds
NM_001002106	341	369	cds
NM_001002106	401	429	cds
NM_001002106	461	491	cds
NM_001002106	492	521	cds
NM_001002106	601	629	cds
NM_001002106	641	669	cds
NM_001002106	841	871	cds
NM_001002106	872	901	cds
NM_001002106	941	971	utr3
NM_001002106	941	971	cds
NM_001002108	31	59	utr5
NM_001002108	111	139	cds
NM_001002108	221	249	cds
NM_001002108	431	461	cds
NM_001002108	462	491	cds
NM_001002108	501	529	cds
NM_001002108	711	741	cds
NM_001002108	811	839	utr3
NM_001002111	91	119	utr5
NM_001002111	91	119	cds
NM_001002111	271	301	cds
NM_001002111	302	331	cds
NM_001002111	351	381	cds
NM_001002111	382	411	cds
NM_001002111	401	431	cds
NM_001002111	471	499	cds
NM_001002111	601	629	cds
NM_001002111	691	721	utr3
NM_001002111	861	891	utr3
NM_001002111	921	949	utr3
NM_001002111	951	981	utr3
NM_001002111	982	1011	utr3
NM_001002111	1041	1069	utr3
NM_001002111	1131	1161	utr3
NM_001002111	1162	1191	utr3
NM_001002111	1191	1219	utr3
NM_001002111	1221	1249	utr3
NM_001002111	1341	1371	utr3
NM_001002113	1	31	utr5
NM_001002113	32	61	utr5
NM_001002113	62	91	utr5
NM_001002113	62	91	cds
NM_001002113	111	139	cds
NM_001002113	191	219	cds
NM_001002113	221	249	cds
NM_001002113	311	339	cds
NM_001002113	351	379	cds
NM_001002113	421	451	cds
NM_001002113	452	481	cds
NM_001002113	491	519	cds
NM_001002113	551	581	cds
NM_001002113	582	611	cds
NM_001002113	631	659	cds
NM_001002113	671	701	cds
NM_001002113	702	731	cds
NM_001002113	732	761	cds
NM_001002113	831	859	cds
NM_001002113	871	901	cds
NM_001002113	921	951	cds
NM_001002113	952	981	cds
NM_001002113	981	1011	utr3
NM_001002113	981	1011	cds
NM_001002113	1012	1041	utr3
NM_001002113	1031	1061	utr3
NM_001002113	1131	1159	utr3
NM_001002113	1191	1219	utr3
NM_001002113	1251	1279	utr3
NM_001002113	1301	1331	utr3
NM_001002113	1332	1361	utr3
NM_001002113	1411	1439	utr3
NM_001002113	1701	1729	utr3
NM_001002113	1771	1799	utr3
NM_001002114	71	99	utr5
NM_001002114	71	99	cds
NM_001002114	161	189	cds
NM_001002114	331	359	cds
NM_001002114	631	659	utr3
NM_001002114	711	739	utr3
NM_001002115	91	121	cds
NM_001002115	131	159	cds
NM_001002115	251	279	cds
NM_001002115	281	309	cds
NM_001002115	361	391	cds
NM_001002115	392	421	cds
NM_001002115	441	469	cds
NM_001002115	481	511	cds
NM_001002115	512	541	cds
NM_001002115	551	581	cds
NM_001002115	681	709	cds
NM_001002115	721	751	cds
NM_001002115	752	781	cds
NM_001002115	781	811	cds
NM_001002115	812	841	utr3
NM_001002115	812	841	cds
NM_001002115	861	889	utr3
NM_001002115	971	999	utr3
NM_001002115	1061	1091	utr3
NM_001002115	1092	1121	utr3
NM_001002115	1251	1279	utr3
NM_001002115	1291	1319	utr3
NM_001002115	1321	1351	utr3
NM_001002115	1352	1381	utr3
NM_001002116	191	221	cds
NM_001002116	222	251	cds
NM_001002116	252	281	cds
NM_001002116	291	319	cds
NM_001002116	471	499	cds
NM_001002116	501	531	cds
NM_001002116	532	561	cds
NM_001002116	701	731	cds
NM_001002116	741	771	cds
NM_001002116	772	801	cds
NM_001002116	791	821	cds
NM_001002116	822	851	cds
NM_001002116	901	929	cds
NM_001002116	1081	1109	cds
NM_001002116	1141	1169	cds
NM_001002116	1191	1221	utr3
NM_001002116	1191	1221	cds
NM_001002116	1321	1351	utr3
NM_001002116	1352	1381	utr3
NM_001002116	1481	1509	utr3
NM_001002116	1521	1551	utr3
NM_001002116	1581	1611	utr3
NM_001002116	1612	1641	utr3
NM_001002118	41	69	utr5
NM_001002118	151	181	utr5
NM_001002118	182	211	cds
NM_001002118	221	251	cds
NM_001002118	361	391	cds
NM_001002118	431	459	cds
NM_001002118	481	511	cds
NM_001002118	571	601	cds
NM_001002118	651	681	cds
NM_001002118	682	711	utr3
NM_001002118	682	711	cds
NM_001002118	791	819	utr3
NM_001002119	411	439	cds
NM_001002119	451	479	cds
NM_001002119	501	531	cds
NM_001002119	532	561	cds
NM_001002119	581	609	cds
NM_001002119	611	639	cds
NM_001002119	771	799	cds
NM_001002120	1381	1409	cds
NM_001002120	1561	1589	cds
NM_001002120	1751	1779	cds
NM_001002120	1971	1999	utr3
NM_001002120	2041	2069	utr3
NM_001002121	41	69	utr5
NM_001002121	71	99	utr5
NM_001002121	111	139	utr5
NM_001002121	111	139	cds
NM_001002121	191	221	cds
NM_001002121	222	251	cds
NM_001002121	361	389	cds
NM_001002121	511	541	cds
NM_001002121	571	601	cds
NM_001002121	651	679	cds
NM_001002121	681	711	cds
NM_001002121	712	741	cds
NM_001002121	751	779	cds
NM_001002121	791	819	cds
NM_001002121	831	861	cds
NM_001002121	862	891	cds
NM_001002121	892	921	cds
NM_001002121	931	959	cds
NM_001002121	981	1009	cds
NM_001002121	1081	1111	cds
NM_001002121	1112	1141	cds
NM_001002121	1151	1179	cds
NM_001002121	1241	1271	cds
NM_001002121	1272	1301	cds
NM_001002121	1302	1331	cds
NM_001002121	1371	1399	cds
NM_001002121	1491	1519	cds
NM_001002121	1541	1569	cds
NM_001002121	1571	1599	cds
NM_001002121	1621	1651	utr3
NM_001002121	1621	1651	cds
NM_001002121	1711	1739	utr3
NM_001002121	1741	1769	utr3
NM_001002121	1771	1801	utr3
NM_001002121	1802	1831	utr3
NM_001002121	1861	1891	utr3
NM_001002121	1892	1921	utr3
NM_001002121	1922	1951	utr3
NM_001002121	1952	1981	utr3
NM_001002121	1982	2011	utr3
NM_001002123	51	79	cds
NM_001002123	81	109	cds
NM_001002123	111	141	cds
NM_001002123	142	171	cds
NM_001002123	271	301	cds
NM_001002123	302	331	cds
NM_001002123	381	411	cds
NM_001002123	412	441	cds
NM_001002123	471	499	cds
NM_001002123	521	549	cds
NM_001002123	561	591	cds
NM_001002123	592	621	cds
NM_001002124	41	69	utr5
NM_001002124	101	129	cds
NM_001002124	141	169	cds
NM_001002124	181	211	cds
NM_001002124	231	261	cds
NM_001002124	262	291	cds
[truncated: 145,480 more rows]

## Sheet: 4hpf->6hpf
TransID	start(0-based)	end(0-based)	region
NM_001001399	131	159	cds
NM_001001399	251	279	cds
NM_001001399	691	721	utr3
NM_001001399	722	751	utr3
NM_001001399	831	859	utr3
NM_001001399	861	891	utr3
NM_001001399	892	921	utr3
NM_001001399	971	999	utr3
NM_001001400	2011	2039	utr3
NM_001001400	2051	2079	utr3
NM_001001400	2141	2169	utr3
NM_001001403	1121	1149	cds
NM_001001403	1271	1299	cds
NM_001001403	1561	1589	cds
NM_001001403	2661	2689	cds
NM_001001403	3011	3039	cds
NM_001001403	3321	3349	cds
NM_001001403	3461	3489	cds
NM_001001403	3611	3639	cds
NM_001001403	3711	3739	utr3
NM_001001403	3941	3969	utr3
NM_001001403	4031	4059	utr3
NM_001001404	21	51	utr5
NM_001001404	52	81	utr5
NM_001001404	52	81	cds
NM_001001404	221	249	cds
NM_001001404	271	299	cds
NM_001001404	371	399	cds
NM_001001404	461	489	cds
NM_001001404	641	669	cds
NM_001001404	701	729	cds
NM_001001404	901	929	utr3
NM_001001404	901	929	cds
NM_001001404	961	989	utr3
NM_001001404	1021	1049	utr3
NM_001001404	1071	1099	utr3
NM_001001404	1101	1129	utr3
NM_001001404	1181	1209	utr3
NM_001001404	1221	1251	utr3
NM_001001404	1252	1281	utr3
NM_001001404	1311	1339	utr3
NM_001001404	1361	1391	utr3
NM_001001404	1392	1421	utr3
NM_001001409	291	319	cds
NM_001001409	411	439	cds
NM_001001409	1091	1119	cds
NM_001001589	21	49	utr5
NM_001001589	61	91	cds
NM_001001589	221	249	cds
NM_001001589	501	529	cds
NM_001001589	541	571	cds
NM_001001589	631	659	cds
NM_001001589	781	809	cds
NM_001001589	851	879	cds
NM_001001589	961	991	cds
NM_001001589	1061	1089	cds
NM_001001589	1131	1159	cds
NM_001001589	1171	1199	cds
NM_001001589	1341	1369	cds
NM_001001589	1521	1549	utr3
NM_001001589	1571	1599	utr3
NM_001001589	1601	1629	utr3
NM_001001590	111	139	cds
NM_001001590	161	191	cds
NM_001001590	192	221	cds
NM_001001590	281	311	cds
NM_001001590	312	341	cds
NM_001001590	342	371	cds
NM_001001590	461	489	cds
NM_001001590	531	559	cds
NM_001001590	571	599	cds
NM_001001590	631	661	cds
NM_001001590	662	691	cds
NM_001001590	741	769	cds
NM_001001590	851	881	cds
NM_001001590	882	911	cds
NM_001001590	1051	1079	cds
NM_001001590	1091	1119	cds
NM_001001590	1251	1281	cds
NM_001001590	1282	1311	utr3
NM_001001590	1282	1311	cds
NM_001001591	911	939	cds
NM_001001591	2091	2119	cds
NM_001001593	31	59	cds
NM_001001593	221	251	cds
NM_001001593	252	281	cds
NM_001001593	331	359	cds
NM_001001593	411	439	cds
NM_001001724	51	81	utr5
NM_001001724	82	111	utr5
NM_001001724	111	139	utr5
NM_001001724	551	579	utr3
NM_001001724	551	579	cds
NM_001001724	591	619	utr3
NM_001001724	841	869	utr3
NM_001001724	911	939	utr3
NM_001001724	941	969	utr3
NM_001001729	61	89	utr5
NM_001001729	641	671	cds
NM_001001729	801	829	utr3
NM_001001729	801	829	cds
NM_001001729	951	979	utr3
NM_001001729	1041	1069	utr3
NM_001001729	1161	1189	utr3
NM_001001729	1231	1261	utr3
NM_001001729	1262	1291	utr3
NM_001001729	1311	1339	utr3
NM_001001729	1411	1439	utr3
NM_001001729	1571	1599	utr3
NM_001001729	1601	1631	utr3
NM_001001729	1811	1839	utr3
NM_001001729	1851	1879	utr3
NM_001001729	1901	1929	utr3
NM_001001729	1991	2021	utr3
NM_001001729	2261	2289	utr3
NM_001001729	2321	2349	utr3
NM_001001729	2381	2411	utr3
NM_001001729	2471	2499	utr3
NM_001001811	31	61	utr5
NM_001001811	171	199	utr5
NM_001001811	171	199	cds
NM_001001811	241	271	cds
NM_001001811	272	301	cds
NM_001001811	301	331	cds
NM_001001811	332	361	cds
NM_001001811	401	429	cds
NM_001001811	461	489	cds
NM_001001811	771	799	cds
NM_001001811	891	919	cds
NM_001001811	951	979	cds
NM_001001811	991	1019	cds
NM_001001811	1401	1429	utr3
NM_001001811	1441	1469	utr3
NM_001001811	1481	1511	utr3
NM_001001811	1561	1589	utr3
NM_001001811	1651	1679	utr3
NM_001001818	161	189	utr5
NM_001001818	701	729	cds
NM_001001818	981	1009	cds
NM_001001818	1011	1039	cds
NM_001001818	1121	1149	cds
NM_001001818	1211	1239	cds
NM_001001818	1291	1321	cds
NM_001001818	1461	1489	cds
NM_001001818	1621	1649	utr3
NM_001001818	1651	1679	utr3
NM_001001818	1771	1801	utr3
NM_001001818	1802	1831	utr3
NM_001001818	1861	1889	utr3
NM_001001818	1941	1969	utr3
NM_001001818	2011	2039	utr3
NM_001001818	2121	2151	utr3
NM_001001818	2152	2181	utr3
NM_001001818	2211	2239	utr3
NM_001001818	2511	2541	utr3
NM_001001819	1	29	utr5
NM_001001819	1	29	cds
NM_001001819	301	329	cds
NM_001001819	371	401	cds
NM_001001819	402	431	cds
NM_001001820	51	79	utr5
NM_001001820	151	179	utr5
NM_001001820	211	239	utr5
NM_001001820	301	331	cds
NM_001001820	332	361	cds
NM_001001820	431	459	cds
NM_001001820	471	501	cds
NM_001001820	502	531	cds
NM_001001820	521	551	cds
NM_001001820	561	589	cds
NM_001001820	691	719	cds
NM_001001820	741	769	cds
NM_001001820	811	841	cds
NM_001001820	842	871	cds
NM_001001820	881	911	cds
NM_001001820	961	989	cds
NM_001001820	1001	1029	cds
NM_001001820	1031	1059	cds
NM_001001820	1061	1089	cds
NM_001001820	1111	1141	cds
NM_001001820	1142	1171	cds
NM_001001820	1211	1239	cds
NM_001001820	1251	1281	cds
NM_001001820	1291	1319	cds
NM_001001820	1381	1411	cds
NM_001001820	1412	1441	cds
NM_001001820	1442	1471	cds
NM_001001820	1481	1509	cds
NM_001001820	1561	1591	utr3
NM_001001820	1592	1621	utr3
NM_001001820	1761	1791	utr3
NM_001001820	1792	1821	utr3
NM_001001820	1811	1839	utr3
NM_001001820	1881	1911	utr3
NM_001001820	1961	1989	utr3
NM_001001820	2041	2071	utr3
NM_001001822	801	829	cds
NM_001001822	1751	1781	cds
NM_001001822	1841	1869	utr3
NM_001001822	2051	2079	utr3
NM_001001822	2421	2449	utr3
NM_001001822	2461	2491	utr3
NM_001001822	2492	2521	utr3
NM_001001823	1401	1429	cds
NM_001001823	2171	2201	cds
NM_001001823	2261	2291	cds
NM_001001823	2292	2321	cds
NM_001001823	2341	2371	utr3
NM_001001823	2372	2401	utr3
NM_001001828	841	869	cds
NM_001001830	261	289	utr5
NM_001001830	1581	1609	utr3
NM_001001830	1581	1609	cds
NM_001001830	1961	1989	utr3
NM_001001830	2051	2079	utr3
NM_001001830	2141	2171	utr3
NM_001001830	2172	2201	utr3
NM_001001830	2511	2539	utr3
NM_001001830	2541	2569	utr3
NM_001001830	2691	2721	utr3
NM_001001830	2722	2751	utr3
NM_001001830	3021	3049	utr3
NM_001001830	3051	3079	utr3
NM_001001830	3081	3109	utr3
NM_001001830	3151	3179	utr3
NM_001001830	3461	3491	utr3
NM_001001838	161	189	cds
NM_001001838	211	239	cds
NM_001001844	1	29	utr5
NM_001001844	31	59	utr5
NM_001001844	101	129	utr5
NM_001001844	141	171	cds
NM_001001844	221	251	cds
NM_001001844	531	561	cds
NM_001001844	562	591	cds
NM_001001844	591	621	cds
NM_001001844	622	651	cds
NM_001001844	731	759	cds
NM_001001844	871	899	cds
NM_001001844	911	941	cds
NM_001001844	942	971	cds
NM_001001844	1001	1031	cds
NM_001001844	1051	1081	cds
NM_001001844	1101	1129	cds
NM_001001844	1211	1239	cds
NM_001001844	1271	1301	cds
NM_001001844	1341	1369	cds
NM_001001844	1401	1431	cds
NM_001001844	1432	1461	cds
NM_001001844	1711	1741	cds
NM_001001844	1861	1889	cds
NM_001001844	2031	2061	cds
NM_001001844	2062	2091	cds
NM_001001844	2131	2161	cds
NM_001001844	2162	2191	cds
NM_001001844	2351	2379	cds
NM_001001844	2381	2409	cds
NM_001001844	2411	2441	cds
NM_001001844	2442	2471	cds
NM_001001844	2491	2519	cds
NM_001001844	2551	2579	utr3
NM_001001844	2751	2779	utr3
NM_001001844	2921	2949	utr3
NM_001001844	3051	3079	utr3
NM_001001844	3091	3121	utr3
NM_001001844	3122	3151	utr3
NM_001001844	3211	3241	utr3
NM_001001844	3242	3271	utr3
NM_001001844	3271	3299	utr3
NM_001001844	3351	3379	utr3
NM_001001844	3421	3451	utr3
NM_001001844	3452	3481	utr3
NM_001001844	3511	3541	utr3
NM_001001844	3691	3719	utr3
NM_001001844	3781	3809	utr3
NM_001001844	4031	4061	utr3
NM_001001844	4062	4091	utr3
NM_001001886	241	269	cds
NM_001001886	581	609	cds
NM_001001886	641	669	cds
NM_001001886	741	771	cds
NM_001001886	772	801	cds
NM_001001886	861	889	cds
NM_001001886	1071	1099	cds
NM_001001886	1121	1151	cds
NM_001001886	1152	1181	cds
NM_001001886	1471	1499	cds
NM_001001886	1531	1559	cds
NM_001001886	1641	1669	cds
NM_001001886	1971	1999	cds
NM_001001886	2031	2061	cds
NM_001001886	2062	2091	cds
NM_001001886	2131	2161	cds
NM_001001886	2162	2191	cds
NM_001001886	2251	2281	cds
NM_001001886	2282	2311	cds
NM_001001886	2391	2419	cds
NM_001001886	2421	2449	cds
NM_001001886	2621	2649	cds
NM_001001886	2661	2689	cds
NM_001001886	2751	2779	cds
NM_001001886	2921	2949	cds
NM_001001886	2951	2981	cds
NM_001001886	3061	3091	cds
NM_001001886	3191	3221	cds
NM_001001886	3222	3251	cds
NM_001001886	3451	3479	utr3
NM_001001886	3491	3519	utr3
NM_001001886	3651	3679	utr3
NM_001001886	3781	3811	utr3
NM_001001886	3841	3871	utr3
NM_001001886	3872	3901	utr3
NM_001001889	21	49	utr5
NM_001001889	221	251	cds
NM_001001889	252	281	cds
NM_001001889	301	329	cds
NM_001001889	411	439	cds
NM_001001889	461	489	cds
NM_001001889	621	649	cds
NM_001001889	651	681	cds
NM_001001889	682	711	cds
NM_001001889	961	989	cds
NM_001001889	1091	1119	cds
NM_001001889	1151	1179	cds
NM_001001889	1331	1361	cds
NM_001001889	1362	1391	cds
NM_001001889	1821	1851	cds
NM_001001889	1891	1919	cds
NM_001001889	1931	1961	cds
NM_001001889	1962	1991	cds
NM_001001889	2141	2169	cds
NM_001001940	11	41	utr5
NM_001001940	61	89	utr5
NM_001001940	61	89	cds
NM_001001940	311	339	cds
NM_001001940	361	389	cds
NM_001001940	661	689	cds
NM_001001940	721	749	cds
NM_001001940	751	779	cds
NM_001001940	821	849	cds
NM_001001940	861	889	cds
NM_001001940	1261	1289	cds
NM_001001940	1311	1339	cds
NM_001001940	1371	1399	cds
NM_001001940	1491	1521	cds
NM_001001940	1522	1551	cds
NM_001001940	1701	1729	cds
NM_001001940	1741	1769	cds
NM_001001940	1941	1969	cds
NM_001001940	2011	2039	cds
NM_001001940	2141	2169	cds
NM_001001940	2271	2299	cds
NM_001001940	2361	2389	cds
NM_001001940	2421	2449	cds
NM_001001940	2731	2759	cds
NM_001001940	2831	2861	cds
NM_001001940	2862	2891	utr3
NM_001001940	2862	2891	cds
NM_001001940	2991	3021	utr3
NM_001001940	3022	3051	utr3
NM_001001941	71	101	utr5
NM_001001941	371	399	cds
NM_001001941	401	431	cds
NM_001001941	432	461	cds
NM_001001941	462	491	cds
NM_001001941	1231	1261	cds
NM_001001941	1301	1329	cds
NM_001001941	1501	1529	cds
NM_001001941	1921	1951	cds
NM_001001941	2091	2119	cds
NM_001001941	2171	2199	cds
NM_001001941	2541	2569	cds
NM_001001941	2601	2629	cds
NM_001001941	2721	2749	cds
NM_001001941	2751	2779	cds
NM_001001941	2961	2989	cds
NM_001001941	2991	3019	cds
NM_001001941	3231	3261	cds
NM_001001941	3331	3359	cds
NM_001001941	3361	3389	cds
NM_001001941	3481	3509	cds
NM_001001941	3741	3769	cds
NM_001001941	3881	3911	utr3
NM_001001941	3912	3941	utr3
NM_001001941	3941	3971	utr3
NM_001001941	4041	4069	utr3
NM_001001943	361	391	cds
NM_001001943	1701	1729	cds
NM_001001943	1951	1979	cds
NM_001001943	2021	2051	cds
NM_001001943	2052	2081	cds
NM_001001943	2201	2229	cds
NM_001001943	2521	2551	utr3
NM_001001943	2771	2799	utr3
NM_001001943	3181	3211	utr3
NM_001001943	3391	3419	utr3
NM_001001943	3481	3511	utr3
NM_001001943	3771	3799	utr3
NM_001001943	3821	3851	utr3
NM_001001943	3852	3881	utr3
NM_001001943	3991	4019	utr3
NM_001001944	121	151	utr5
NM_001001944	152	181	utr5
NM_001001944	171	201	utr5
NM_001001944	171	201	cds
NM_001001944	202	231	cds
NM_001001944	391	419	cds
NM_001001944	501	531	cds
NM_001001944	551	579	cds
NM_001001944	581	609	cds
NM_001001944	621	649	cds
NM_001001944	821	849	cds
NM_001001944	911	941	cds
NM_001001944	942	971	cds
NM_001001944	971	999	cds
NM_001001944	1001	1029	cds
NM_001001944	1131	1161	cds
NM_001001944	1162	1191	cds
NM_001001944	1211	1239	cds
NM_001001944	1241	1269	cds
NM_001001944	1591	1619	cds
NM_001001944	1651	1679	cds
NM_001001944	1701	1729	cds
NM_001001944	1761	1791	cds
NM_001001944	1921	1949	cds
NM_001001944	1951	1979	cds
NM_001001944	2231	2261	cds
NM_001001944	2262	2291	cds
NM_001001944	2361	2391	cds
NM_001001944	2471	2499	cds
NM_001001944	2541	2569	cds
NM_001001944	2631	2659	cds
NM_001001944	2921	2949	cds
NM_001001944	3051	3081	utr3
NM_001001944	3082	3111	utr3
NM_001001944	3112	3141	utr3
NM_001001944	3161	3191	utr3
NM_001001944	3192	3221	utr3
NM_001001944	3251	3279	utr3
NM_001001944	3581	3609	utr3
NM_001001944	3851	3879	utr3
NM_001001944	3991	4019	utr3
NM_001001948	11	41	cds
NM_001001948	42	71	cds
NM_001001948	61	89	cds
NM_001001948	111	141	cds
NM_001001948	142	171	cds
NM_001001948	351	379	cds
NM_001001948	871	899	cds
NM_001001948	1291	1319	cds
NM_001001948	1321	1349	cds
NM_001001951	281	309	cds
NM_001001951	741	769	cds
NM_001001951	811	839	cds
NM_001001951	1151	1179	cds
NM_001001951	1181	1211	cds
NM_001001951	1212	1241	cds
NM_001001951	1291	1319	cds
NM_001001951	1331	1359	cds
NM_001001951	1871	1899	utr3
NM_001001951	1971	1999	utr3
NM_001001951	2021	2049	utr3
NM_001001951	2081	2109	utr3
NM_001002013	31	61	utr5
NM_001002013	62	91	utr5
NM_001002013	101	129	utr5
NM_001002013	101	129	cds
NM_001002013	181	209	cds
NM_001002013	271	301	cds
NM_001002013	302	331	cds
NM_001002013	321	351	cds
NM_001002013	461	489	cds
NM_001002013	491	519	cds
NM_001002013	621	651	cds
NM_001002013	652	681	cds
NM_001002013	671	699	cds
NM_001002013	911	939	cds
NM_001002013	981	1009	cds
NM_001002013	1171	1201	cds
NM_001002013	1202	1231	cds
NM_001002013	1631	1659	cds
NM_001002013	1811	1839	cds
NM_001002013	1881	1911	cds
NM_001002013	1912	1941	cds
NM_001002013	1961	1989	cds
NM_001002013	2281	2311	cds
NM_001002013	2341	2369	cds
NM_001002013	2521	2549	cds
NM_001002013	2651	2679	cds
NM_001002013	2771	2799	cds
NM_001002013	2921	2949	cds
NM_001002013	2961	2989	utr3
NM_001002013	2961	2989	cds
NM_001002013	3011	3039	utr3
NM_001002013	3061	3089	utr3
NM_001002013	3121	3151	utr3
NM_001002013	3152	3181	utr3
NM_001002037	11	39	utr5
NM_001002037	101	131	cds
NM_001002037	132	161	cds
NM_001002037	211	241	cds
NM_001002037	242	271	cds
NM_001002037	471	499	cds
NM_001002037	571	599	cds
NM_001002037	891	919	cds
NM_001002037	1051	1079	cds
NM_001002037	1211	1241	cds
NM_001002037	1242	1271	cds
NM_001002037	1271	1299	cds
NM_001002037	1381	1411	cds
NM_001002037	1412	1441	cds
NM_001002037	1442	1471	cds
NM_001002037	1561	1589	cds
NM_001002037	1641	1669	cds
NM_001002037	1711	1739	cds
NM_001002037	1771	1799	cds
NM_001002037	1801	1829	cds
NM_001002037	1841	1869	cds
NM_001002040	71	99	cds
NM_001002040	171	201	cds
NM_001002040	202	231	cds
NM_001002040	231	259	cds
NM_001002040	261	289	cds
NM_001002040	401	429	cds
NM_001002040	611	641	cds
NM_001002040	642	671	cds
NM_001002040	661	689	cds
NM_001002040	711	739	utr3
NM_001002040	791	819	utr3
NM_001002040	911	939	utr3
NM_001002040	1021	1051	utr3
NM_001002040	1052	1081	utr3
NM_001002041	211	239	cds
NM_001002041	241	269	cds
NM_001002041	371	401	cds
NM_001002041	661	691	cds
NM_001002041	781	811	cds
NM_001002041	812	841	cds
NM_001002041	911	939	cds
NM_001002041	991	1019	cds
NM_001002041	1021	1049	cds
NM_001002041	1111	1139	cds
NM_001002041	1331	1359	cds
NM_001002041	1481	1509	cds
NM_001002041	1541	1569	cds
NM_001002041	1591	1619	cds
NM_001002041	1751	1781	cds
NM_001002041	1782	1811	cds
NM_001002041	1921	1951	cds
NM_001002041	2021	2051	cds
NM_001002041	2081	2109	cds
NM_001002041	2141	2169	cds
NM_001002041	2481	2509	utr3
NM_001002042	11	39	utr5
NM_001002042	11	39	cds
NM_001002042	51	81	cds
NM_001002042	241	269	cds
NM_001002042	281	309	cds
NM_001002042	501	529	cds
NM_001002042	551	579	cds
NM_001002042	731	759	cds
NM_001002042	891	919	cds
NM_001002042	941	969	cds
NM_001002042	981	1009	cds
NM_001002042	1231	1259	cds
NM_001002042	1291	1319	cds
NM_001002042	1351	1381	cds
NM_001002042	1421	1449	cds
NM_001002042	1531	1559	cds
NM_001002042	1831	1859	cds
NM_001002042	1921	1949	cds
NM_001002042	2271	2299	cds
NM_001002042	2991	3019	cds
NM_001002042	3021	3049	cds
NM_001002042	3051	3079	cds
NM_001002042	3181	3209	cds
NM_001002042	3261	3289	cds
NM_001002042	3331	3359	cds
NM_001002042	3451	3479	cds
NM_001002042	3501	3529	cds
NM_001002042	3651	3681	cds
NM_001002042	3771	3799	cds
NM_001002047	411	439	cds
NM_001002047	691	721	utr3
NM_001002047	691	721	cds
NM_001002047	722	751	utr3
NM_001002050	31	61	utr5
NM_001002050	91	121	utr5
NM_001002050	122	151	utr5
NM_001002050	141	169	utr5
NM_001002050	211	239	utr5
NM_001002050	211	239	cds
NM_001002050	261	289	cds
NM_001002050	331	359	cds
NM_001002050	431	461	cds
NM_001002050	462	491	cds
NM_001002050	581	609	cds
NM_001002050	621	651	cds
NM_001002050	652	681	cds
NM_001002050	771	799	cds
NM_001002050	811	839	cds
NM_001002050	891	921	cds
NM_001002050	922	951	cds
NM_001002050	952	981	utr3
NM_001002050	952	981	cds
NM_001002050	1071	1099	utr3
NM_001002051	1661	1689	utr3
NM_001002053	171	199	cds
NM_001002053	481	509	cds
NM_001002053	521	551	cds
NM_001002053	552	581	cds
NM_001002053	691	721	utr3
NM_001002053	722	751	utr3
NM_001002053	891	919	utr3
NM_001002055	371	399	cds
NM_001002055	491	519	cds
NM_001002055	861	891	cds
NM_001002055	892	921	cds
NM_001002055	1031	1059	cds
NM_001002055	1071	1099	cds
NM_001002055	1141	1169	cds
NM_001002055	1551	1581	utr3
NM_001002055	1582	1611	utr3
NM_001002055	1601	1631	utr3
NM_001002055	1741	1769	utr3
NM_001002055	1781	1809	utr3
NM_001002058	11	41	utr5
NM_001002058	42	71	utr5
NM_001002058	111	141	utr5
NM_001002058	181	211	cds
NM_001002058	521	551	cds
NM_001002058	671	699	cds
NM_001002058	881	909	cds
NM_001002058	931	959	cds
NM_001002058	1271	1299	utr3
NM_001002058	1331	1359	utr3
NM_001002058	1361	1389	utr3
NM_001002058	1411	1439	utr3
NM_001002061	81	111	utr5
NM_001002061	121	149	utr5
NM_001002061	281	309	cds
NM_001002061	321	349	cds
NM_001002061	551	581	cds
NM_001002061	582	611	cds
NM_001002061	601	631	cds
NM_001002061	632	661	cds
NM_001002061	1001	1031	utr3
NM_001002061	1032	1061	utr3
NM_001002061	1131	1159	utr3
NM_001002063	71	99	utr5
NM_001002063	151	181	utr5
NM_001002063	251	279	cds
NM_001002063	281	309	cds
NM_001002063	391	421	cds
NM_001002063	431	459	cds
NM_001002063	461	489	cds
NM_001002063	591	619	cds
NM_001002063	871	899	cds
NM_001002063	1241	1269	cds
NM_001002063	1391	1419	cds
NM_001002063	1451	1481	cds
NM_001002063	1691	1719	cds
NM_001002063	1751	1779	cds
NM_001002063	1811	1839	cds
NM_001002063	1901	1929	cds
NM_001002064	161	189	utr5
NM_001002064	161	189	cds
NM_001002064	251	281	cds
NM_001002064	282	311	cds
NM_001002064	321	349	cds
NM_001002064	751	781	cds
NM_001002064	831	859	cds
NM_001002064	891	919	cds
NM_001002064	1131	1159	cds
NM_001002064	1361	1391	utr3
NM_001002064	1361	1391	cds
NM_001002064	1451	1479	utr3
NM_001002064	1571	1599	utr3
NM_001002065	661	689	cds
NM_001002065	881	909	cds
NM_001002065	911	939	cds
NM_001002065	1021	1049	cds
NM_001002065	1081	1109	cds
NM_001002065	1421	1449	utr3
NM_001002065	1481	1509	utr3
NM_001002067	91	121	utr5
NM_001002067	241	271	cds
NM_001002067	381	411	cds
NM_001002067	441	469	cds
NM_001002067	551	579	utr3
NM_001002067	671	699	utr3
NM_001002068	21	49	utr5
NM_001002068	111	139	cds
NM_001002068	161	189	cds
NM_001002068	191	219	cds
NM_001002068	231	259	cds
NM_001002068	481	509	utr3
NM_001002068	751	779	utr3
NM_001002069	21	49	utr5
NM_001002069	21	49	cds
NM_001002069	191	221	cds
NM_001002069	222	251	cds
NM_001002069	261	291	cds
NM_001002070	141	169	cds
NM_001002070	231	259	cds
NM_001002070	261	289	cds
NM_001002070	291	319	cds
NM_001002070	451	479	cds
NM_001002070	611	639	cds
NM_001002070	711	739	cds
NM_001002070	831	861	cds
NM_001002070	862	891	cds
NM_001002070	921	949	cds
NM_001002070	1091	1121	cds
NM_001002070	1122	1151	cds
NM_001002072	151	179	cds
NM_001002072	271	299	cds
NM_001002072	331	359	cds
NM_001002072	411	439	cds
NM_001002072	711	739	utr3
NM_001002072	881	911	utr3
NM_001002072	912	941	utr3
NM_001002072	1061	1089	utr3
NM_001002072	1111	1139	utr3
NM_001002073	61	91	utr5
NM_001002073	92	121	utr5
NM_001002073	92	121	cds
NM_001002073	181	209	cds
NM_001002073	271	299	cds
NM_001002073	301	329	cds
NM_001002073	361	389	cds
NM_001002073	421	449	utr3
NM_001002073	421	449	cds
NM_001002073	451	479	utr3
NM_001002073	501	531	utr3
NM_001002073	532	561	utr3
NM_001002073	601	631	utr3
NM_001002073	632	661	utr3
NM_001002073	841	869	utr3
NM_001002073	871	899	utr3
NM_001002073	1001	1031	utr3
NM_001002073	1091	1121	utr3
NM_001002077	21	51	utr5
NM_001002077	52	81	utr5
NM_001002077	151	179	cds
NM_001002077	361	389	utr3
NM_001002078	41	71	utr5
NM_001002078	251	281	utr3
NM_001002078	282	311	utr3
NM_001002078	331	359	utr3
NM_001002079	11	39	cds
NM_001002079	61	89	cds
NM_001002079	121	151	cds
NM_001002079	231	259	cds
NM_001002079	271	301	cds
NM_001002079	302	331	cds
NM_001002079	321	351	cds
NM_001002079	361	391	cds
NM_001002079	431	459	cds
NM_001002080	2821	2849	cds
NM_001002080	2961	2991	cds
NM_001002080	3341	3369	cds
NM_001002081	1	31	utr5
NM_001002081	32	61	utr5
NM_001002081	32	61	cds
NM_001002081	62	91	cds
NM_001002081	92	121	cds
NM_001002081	151	179	cds
NM_001002081	291	321	cds
NM_001002081	322	351	cds
NM_001002081	351	379	cds
NM_001002081	431	461	utr3
NM_001002081	431	461	cds
NM_001002081	462	491	utr3
NM_001002081	511	539	utr3
NM_001002082	21	49	utr5
NM_001002082	91	121	cds
NM_001002082	122	151	cds
NM_001002082	191	219	cds
NM_001002082	331	359	cds
NM_001002082	491	519	cds
NM_001002082	521	549	cds
NM_001002082	571	599	utr3
NM_001002082	571	599	cds
NM_001002082	611	641	utr3
NM_001002082	671	699	utr3
NM_001002082	721	751	utr3
NM_001002082	752	781	utr3
NM_001002082	781	811	utr3
NM_001002082	812	841	utr3
NM_001002082	861	889	utr3
NM_001002084	31	61	utr5
NM_001002084	31	61	cds
NM_001002084	101	129	cds
NM_001002084	131	159	cds
NM_001002084	201	231	cds
NM_001002084	261	291	cds
NM_001002084	351	379	cds
NM_001002084	381	409	cds
NM_001002084	481	509	cds
NM_001002084	901	929	utr3
NM_001002084	991	1021	utr3
NM_001002086	101	129	utr5
NM_001002086	141	169	utr5
NM_001002086	141	169	cds
NM_001002086	241	271	cds
NM_001002086	272	301	cds
NM_001002086	331	359	cds
NM_001002086	431	459	cds
NM_001002086	511	541	cds
NM_001002086	661	689	cds
NM_001002086	691	719	cds
NM_001002086	781	809	utr3
NM_001002086	781	809	cds
NM_001002086	1081	1111	utr3
NM_001002086	1112	1141	utr3
NM_001002086	1161	1191	utr3
NM_001002087	1761	1789	utr3
NM_001002089	21	49	utr5
NM_001002089	81	109	utr5
NM_001002089	151	179	utr5
NM_001002089	221	251	utr5
NM_001002089	252	281	utr5
NM_001002089	281	309	utr5
NM_001002089	281	309	cds
NM_001002089	491	519	cds
NM_001002089	841	869	cds
NM_001002089	1051	1079	cds
NM_001002089	1091	1119	cds
NM_001002089	1581	1609	utr3
NM_001002089	1661	1689	utr3
NM_001002091	51	79	cds
NM_001002091	141	169	cds
NM_001002091	241	269	cds
NM_001002091	301	329	cds
NM_001002091	381	409	cds
NM_001002091	441	469	cds
NM_001002091	571	601	cds
NM_001002091	602	631	cds
NM_001002091	621	649	cds
NM_001002091	841	869	cds
NM_001002091	891	919	cds
NM_001002091	971	1001	cds
NM_001002091	1002	1031	cds
NM_001002091	1341	1369	utr3
NM_001002091	1341	1369	cds
NM_001002096	891	919	utr3
NM_001002096	891	919	cds
NM_001002096	1431	1459	utr3
NM_001002097	81	109	cds
NM_001002097	131	159	cds
NM_001002097	241	271	utr3
NM_001002097	241	271	cds
NM_001002097	361	389	utr3
NM_001002097	591	619	utr3
NM_001002097	641	669	utr3
NM_001002097	721	749	utr3
NM_001002097	771	799	utr3
NM_001002097	931	959	utr3
NM_001002099	311	341	cds
NM_001002099	342	371	cds
NM_001002099	601	629	cds
NM_001002099	781	811	cds
NM_001002099	812	841	cds
NM_001002099	871	899	cds
NM_001002099	941	969	cds
NM_001002099	1081	1109	utr3
NM_001002099	1141	1169	utr3
NM_001002099	1191	1219	utr3
NM_001002099	1231	1261	utr3
NM_001002099	1591	1621	utr3
NM_001002099	1622	1651	utr3
NM_001002104	41	69	utr5
NM_001002104	41	69	cds
NM_001002104	101	129	cds
NM_001002104	141	169	cds
NM_001002104	371	399	cds
NM_001002104	411	439	cds
NM_001002104	471	499	cds
NM_001002104	581	609	cds
NM_001002104	621	649	cds
NM_001002104	661	689	cds
NM_001002104	721	751	cds
NM_001002104	752	781	cds
NM_001002104	851	879	cds
NM_001002104	921	949	cds
NM_001002104	951	979	utr3
NM_001002104	951	979	cds
NM_001002104	991	1019	utr3
NM_001002104	1061	1089	utr3
NM_001002104	1131	1159	utr3
NM_001002104	1281	1309	utr3
NM_001002104	1421	1449	utr3
NM_001002104	1471	1499	utr3
NM_001002106	1	29	utr5
NM_001002106	91	121	cds
NM_001002106	122	151	cds
NM_001002106	221	249	cds
NM_001002106	251	281	cds
NM_001002106	421	451	cds
NM_001002106	541	569	cds
NM_001002106	601	629	cds
NM_001002106	691	719	cds
NM_001002106	721	749	cds
NM_001002106	961	989	utr3
NM_001002106	961	989	cds
NM_001002108	211	239	cds
NM_001002108	251	279	cds
NM_001002108	451	479	cds
NM_001002108	571	599	cds
NM_001002108	651	679	cds
NM_001002108	691	719	cds
NM_001002108	801	829	utr3
NM_001002111	31	59	utr5
NM_001002111	71	101	utr5
NM_001002111	111	139	cds
NM_001002111	311	339	cds
NM_001002111	431	459	cds
NM_001002111	681	711	utr3
NM_001002111	712	741	utr3
NM_001002111	771	799	utr3
NM_001002111	861	891	utr3
NM_001002111	892	921	utr3
NM_001002111	1061	1089	utr3
NM_001002111	1131	1159	utr3
NM_001002111	1201	1229	utr3
NM_001002111	1331	1361	utr3
NM_001002112	1021	1049	cds
NM_001002112	1231	1261	utr3
NM_001002113	811	839	cds
NM_001002113	1081	1111	utr3
NM_001002113	1141	1171	utr3
NM_001002113	1172	1201	utr3
NM_001002113	1251	1279	utr3
NM_001002113	1301	1331	utr3
NM_001002113	1332	1361	utr3
NM_001002113	1411	1439	utr3
NM_001002113	1511	1539	utr3
NM_001002113	1611	1639	utr3
NM_001002113	1961	1989	utr3
NM_001002114	61	89	utr5
NM_001002114	91	121	utr5
NM_001002114	91	121	cds
NM_001002114	321	349	cds
NM_001002114	361	391	cds
NM_001002114	392	421	cds
NM_001002114	631	661	utr3
NM_001002114	691	721	utr3
NM_001002114	722	751	utr3
NM_001002115	551	579	cds
NM_001002115	831	859	utr3
NM_001002115	831	859	cds
NM_001002115	1151	1179	utr3
NM_001002115	1351	1379	utr3
NM_001002116	41	69	utr5
NM_001002116	161	189	cds
NM_001002116	281	309	cds
NM_001002116	351	379	cds
NM_001002116	441	469	cds
NM_001002116	681	709	cds
NM_001002116	761	789	cds
NM_001002116	881	909	cds
NM_001002116	1181	1209	utr3
NM_001002116	1181	1209	cds
NM_001002116	1391	1419	utr3
NM_001002116	1441	1469	utr3
NM_001002116	1501	1531	utr3
NM_001002116	1532	1561	utr3
NM_001002116	1581	1609	utr3
NM_001002116	1681	1709	utr3
NM_001002118	11	39	utr5
NM_001002118	101	131	utr5
NM_001002118	171	201	utr5
NM_001002118	171	201	cds
NM_001002118	221	251	cds
NM_001002118	341	371	cds
NM_001002118	401	429	cds
NM_001002118	521	549	cds
NM_001002118	631	659	cds
NM_001002118	661	689	cds
NM_001002118	691	719	utr3
NM_001002118	691	719	cds
NM_001002118	811	839	utr3
NM_001002118	881	909	utr3
NM_001002121	21	49	utr5
NM_001002121	281	311	cds
NM_001002121	331	361	cds
NM_001002121	362	391	cds
NM_001002121	451	481	cds
NM_001002121	482	511	cds
NM_001002121	761	789	cds
NM_001002121	921	949	cds
NM_001002121	951	979	cds
NM_001002121	981	1009	cds
NM_001002121	1191	1219	cds
NM_001002121	1241	1269	cds
NM_001002121	1341	1369	cds
NM_001002121	1391	1421	cds
NM_001002121	1431	1459	cds
NM_001002121	1641	1671	utr3
NM_001002121	1681	1709	utr3
NM_001002121	1861	1891	utr3
NM_001002121	1931	1959	utr3
NM_001002123	311	339	cds
NM_001002123	411	441	cds
NM_001002123	442	471	cds
NM_001002124	21	49	utr5
NM_001002124	811	839	utr3
NM_001002124	871	899	utr3
NM_001002127	71	101	utr5
NM_001002127	181	209	cds
NM_001002127	291	319	cds
NM_001002127	601	629	cds
NM_001002127	701	731	cds
NM_001002127	732	761	cds
NM_001002127	762	791	cds
NM_001002127	781	809	cds
NM_001002127	911	941	cds
NM_001002127	942	971	utr3
NM_001002127	942	971	cds
NM_001002127	972	1001	utr3
NM_001002127	1001	1029	utr3
NM_001002128	71	99	cds
NM_001002128	341	369	cds
NM_001002128	611	639	cds
NM_001002128	671	699	cds
NM_001002128	861	889	cds
NM_001002128	901	929	cds
NM_001002128	981	1009	cds
NM_001002128	1041	1069	cds
NM_001002128	1071	1099	cds
NM_001002128	1161	1189	cds
NM_001002128	1321	1349	utr3
NM_001002128	1321	1349	cds
NM_001002128	1481	1509	utr3
NM_001002128	1511	1539	utr3
NM_001002128	1541	1571	utr3
NM_001002128	1581	1609	utr3
NM_001002131	21	49	utr5
NM_001002131	21	49	cds
NM_001002131	81	111	cds
NM_001002131	112	141	cds
NM_001002131	251	279	cds
NM_001002131	511	539	cds
NM_001002131	571	599	cds
NM_001002131	601	629	cds
NM_001002131	671	701	cds
NM_001002131	702	731	cds
NM_001002131	801	831	cds
NM_001002131	861	891	utr3
NM_001002131	991	1019	utr3
NM_001002131	1021	1049	utr3
NM_001002131	1081	1109	utr3
NM_001002131	1321	1351	utr3
NM_001002131	1352	1381	utr3
NM_001002137	51	79	utr5
NM_001002137	91	121	utr5
NM_001002137	91	121	cds
NM_001002137	171	199	cds
NM_001002137	241	269	cds
NM_001002137	311	339	cds
NM_001002137	351	381	cds
NM_001002137	382	411	cds
NM_001002137	401	429	cds
NM_001002137	431	459	cds
NM_001002137	521	551	cds
NM_001002137	552	581	cds
NM_001002137	671	701	utr3
NM_001002137	721	749	utr3
NM_001002137	841	871	utr3
NM_001002137	872	901	utr3
NM_001002137	902	931	utr3
NM_001002139	1	29	utr5
NM_001002139	1	29	cds
NM_001002139	31	59	cds
NM_001002139	211	239	cds
NM_001002139	261	291	cds
NM_001002139	292	321	cds
NM_001002139	361	389	cds
NM_001002139	391	419	cds
NM_001002139	501	529	cds
NM_001002139	561	589	utr3
NM_001002144	101	129	cds
NM_001002144	151	179	cds
NM_001002144	251	279	cds
NM_001002144	691	719	utr3
NM_001002144	731	759	utr3
NM_001002144	891	921	utr3
NM_001002144	922	951	utr3
NM_001002145	31	59	utr5
NM_001002145	71	101	utr5
NM_001002145	181	209	utr5
NM_001002145	181	209	cds
NM_001002145	231	259	cds
NM_001002145	411	439	cds
NM_001002145	501	529	cds
NM_001002145	561	589	cds
NM_001002145	651	679	cds
NM_001002145	681	709	cds
NM_001002145	711	739	cds
NM_001002145	831	861	cds
NM_001002145	862	891	cds
NM_001002145	931	961	cds
NM_001002145	962	991	cds
NM_001002145	1271	1299	utr3
NM_001002145	1401	1429	utr3
NM_001002145	1431	1461	utr3
NM_001002145	1462	1491	utr3
NM_001002145	1531	1561	utr3
NM_001002145	1691	1719	utr3
NM_001002147	351	379	cds
NM_001002147	411	439	utr3
NM_001002147	441	469	utr3
NM_001002147	601	629	utr3
NM_001002147	671	701	utr3
NM_001002147	711	739	utr3
NM_001002147	791	819	utr3
NM_001002151	1481	1511	utr3
NM_001002151	1512	1541	utr3
NM_001002151	1781	1809	utr3
NM_001002151	1981	2009	utr3
NM_001002152	41	69	utr5
NM_001002152	141	171	cds
NM_001002152	172	201	cds
NM_001002152	551	579	cds
NM_001002152	651	679	utr3
NM_001002152	651	679	cds
NM_001002152	711	739	utr3
NM_001002152	741	769	utr3
NM_001002152	771	799	utr3
NM_001002152	1111	1139	utr3
NM_001002152	1171	1201	utr3
NM_001002152	1202	1231	utr3
NM_001002152	1221	1249	utr3
NM_001002152	1251	1279	utr3
NM_001002152	1281	1311	utr3
NM_001002152	1312	1341	utr3
NM_001002152	1331	1359	utr3
NM_001002152	1451	1481	utr3
NM_001002152	1482	1511	utr3
NM_001002152	1511	1541	utr3
NM_001002152	1542	1571	utr3
NM_001002152	1561	1589	utr3
NM_001002152	1591	1621	utr3
NM_001002152	1622	1651	utr3
NM_001002152	1671	1701	utr3
NM_001002155	21	51	utr5
NM_001002155	52	81	cds
NM_001002155	82	111	cds
NM_001002155	112	141	cds
NM_001002155	221	249	cds
NM_001002155	391	421	cds
NM_001002155	422	451	cds
NM_001002155	491	519	cds
NM_001002156	991	1019	utr3
NM_001002157	201	229	cds
NM_001002157	481	509	cds
NM_001002157	571	599	cds
NM_001002157	691	719	cds
NM_001002157	771	799	cds
NM_001002157	941	969	cds
NM_001002157	1241	1269	utr3
NM_001002160	71	101	cds
NM_001002160	102	131	cds
NM_001002160	221	249	cds
NM_001002160	341	369	cds
NM_001002160	451	479	cds
NM_001002160	671	699	cds
NM_001002160	851	881	cds
NM_001002160	882	911	cds
NM_001002160	911	941	cds
NM_001002160	942	971	cds
NM_001002160	1001	1029	cds
NM_001002160	1141	1171	utr3
NM_001002160	1221	1249	utr3
NM_001002160	1301	1329	utr3
NM_001002160	1391	1419	utr3
NM_001002160	1421	1449	utr3
NM_001002161	61	89	utr5
NM_001002161	321	349	cds
NM_001002161	721	749	cds
NM_001002161	891	919	cds
NM_001002161	1041	1071	cds
NM_001002161	1081	1109	cds
NM_001002161	1181	1209	cds
NM_001002161	1701	1729	cds
NM_001002161	1781	1809	utr3
NM_001002162	31	61	utr5
NM_001002162	62	91	utr5
NM_001002162	111	139	cds
NM_001002162	241	269	cds
NM_001002162	441	471	cds
NM_001002162	472	501	cds
NM_001002162	561	591	cds
NM_001002162	711	739	cds
NM_001002162	931	959	utr3
NM_001002162	1161	1189	utr3
NM_001002162	1331	1359	utr3
NM_001002162	1661	1689	utr3
NM_001002162	1791	1819	utr3
NM_001002162	1901	1929	utr3
NM_001002163	31	61	cds
NM_001002163	62	91	cds
NM_001002163	92	121	cds
NM_001002163	122	151	cds
NM_001002163	211	239	cds
NM_001002163	281	309	cds
NM_001002163	461	489	utr3
NM_001002164	1	29	utr5
NM_001002164	71	99	utr5
NM_001002164	111	141	utr5
NM_001002164	151	179	cds
NM_001002164	271	299	cds
NM_001002164	371	401	cds
NM_001002164	402	431	cds
NM_001002164	521	549	cds
NM_001002164	561	591	cds
NM_001002164	851	881	cds
NM_001002164	981	1009	cds
NM_001002164	1051	1081	cds
NM_001002164	1082	1111	cds
NM_001002164	1181	1209	cds
NM_001002164	1281	1309	cds
NM_001002164	1371	1401	utr3
NM_001002164	1402	1431	utr3
NM_001002164	1421	1449	utr3
NM_001002164	1481	1511	utr3
NM_001002164	1512	1541	utr3
NM_001002164	1551	1581	utr3
NM_001002166	111	141	utr5
NM_001002166	142	171	utr5
NM_001002166	171	199	utr5
NM_001002166	171	199	cds
NM_001002166	291	319	cds
NM_001002166	381	409	cds
NM_001002166	741	769	cds
NM_001002166	1001	1029	cds
NM_001002166	1201	1229	cds
NM_001002166	1231	1261	cds
NM_001002166	1262	1291	cds
NM_001002166	1301	1329	cds
NM_001002166	1341	1369	cds
NM_001002166	1451	1479	cds
NM_001002166	1681	1709	cds
NM_001002166	1721	1749	cds
NM_001002166	1971	1999	cds
NM_001002166	2041	2069	cds
NM_001002166	2211	2239	cds
NM_001002166	2291	2319	cds
NM_001002166	2351	2379	cds
NM_001002166	2401	2429	cds
NM_001002166	2431	2459	cds
NM_001002166	2641	2669	cds
NM_001002166	2801	2829	cds
NM_001002166	2991	3019	cds
NM_001002166	3051	3079	cds
NM_001002166	3091	3119	cds
NM_001002166	3171	3199	cds
NM_001002166	3281	3309	cds
NM_001002166	3661	3689	cds
NM_001002166	3831	3859	cds
NM_001002166	4391	4421	cds
NM_001002166	4511	4541	cds
NM_001002166	4542	4571	cds
NM_001002166	5121	5149	utr3
NM_001002166	5181	5211	utr3
NM_001002166	5341	5371	utr3
NM_001002172	1151	1179	cds
NM_001002172	1321	1349	utr3
NM_001002172	1611	1641	utr3
NM_001002172	1642	1671	utr3
NM_001002179	41	69	utr5
NM_001002179	171	199	cds
NM_001002179	291	321	cds
NM_001002179	421	449	cds
NM_001002179	511	539	cds
NM_001002179	731	759	cds
NM_001002179	831	861	cds
NM_001002179	1091	1119	cds
NM_001002179	1231	1259	utr3
NM_001002179	1261	1289	utr3
NM_001002179	1301	1329	utr3
NM_001002179	1331	1361	utr3
NM_001002179	1401	1429	utr3
NM_001002179	1541	1569	utr3
NM_001002179	1591	1621	utr3
NM_001002179	1622	1651	utr3
NM_001002179	1781	1809	utr3
NM_001002179	2141	2169	utr3
NM_001002199	171	199	cds
NM_001002199	231	259	cds
NM_001002199	441	471	cds
NM_001002199	472	501	cds
NM_001002199	521	549	utr3
NM_001002200	111	139	utr5
NM_001002200	111	139	cds
NM_001002200	691	719	cds
NM_001002200	931	959	cds
NM_001002200	1071	1099	cds
NM_001002200	1111	1139	cds
NM_001002203	81	109	cds
NM_001002203	111	139	cds
NM_001002203	251	279	cds
NM_001002203	291	319	cds
NM_001002203	391	419	utr3
NM_001002203	461	491	utr3
NM_001002203	621	649	utr3
NM_001002204	51	79	utr5
NM_001002204	131	159	cds
NM_001002204	181	211	cds
NM_001002204	212	241	cds
NM_001002204	831	859	cds
NM_001002204	861	891	cds
NM_001002204	971	999	cds
NM_001002204	1011	1039	cds
NM_001002204	1191	1221	utr3
NM_001002204	1222	1251	utr3
NM_001002220	381	409	cds
NM_001002220	411	439	cds
NM_001002220	441	469	cds
NM_001002220	471	499	cds
NM_001002220	671	701	utr3
NM_001002220	702	731	utr3
NM_001002220	741	769	utr3
NM_001002220	771	799	utr3
NM_001002220	801	829	utr3
NM_001002220	841	869	utr3
NM_001002220	911	939	utr3
NM_001002220	941	971	utr3
NM_001002220	972	1001	utr3
NM_001002220	1021	1049	utr3
NM_001002221	751	779	cds
NM_001002221	891	919	cds
NM_001002221	1061	1089	cds
NM_001002221	1191	1219	utr3
NM_001002222	241	269	cds
NM_001002222	321	349	cds
NM_001002222	731	761	cds
NM_001002222	781	809	cds
NM_001002222	891	921	cds
NM_001002222	931	961	cds
NM_001002222	1611	1639	cds
NM_001002222	1891	1919	cds
NM_001002222	2001	2031	cds
NM_001002222	2032	2061	cds
NM_001002222	2131	2159	utr3
NM_001002222	2131	2159	cds
NM_001002222	2321	2349	utr3
NM_001002222	2581	2609	utr3
NM_001002222	2621	2649	utr3
NM_001002222	2651	2681	utr3
NM_001002222	2682	2711	utr3
NM_001002222	2821	2849	utr3
NM_001002222	2931	2959	utr3
NM_001002222	2961	2989	utr3
NM_001002222	3041	3069	utr3
NM_001002222	3151	3179	utr3
NM_001002222	3331	3359	utr3
NM_001002222	3381	3411	utr3
NM_001002222	3412	3441	utr3
NM_001002222	3501	3529	utr3
NM_001002222	3561	3589	utr3
NM_001002222	3691	3719	utr3
NM_001002222	3731	3759	utr3
NM_001002222	3851	3879	utr3
NM_001002222	3921	3949	utr3
NM_001002222	4031	4059	utr3
NM_001002222	4201	4229	utr3
NM_001002222	4371	4399	utr3
NM_001002222	4511	4541	utr3
NM_001002222	5141	5169	utr3
NM_001002222	5301	5329	utr3
NM_001002222	5451	5479	utr3
NM_001002222	5481	5509	utr3
NM_001002222	5521	5549	utr3
NM_001002222	5701	5729	utr3
NM_001002226	161	189	cds
NM_001002297	41	71	cds
NM_001002297	281	311	cds
NM_001002297	312	341	cds
NM_001002297	531	559	cds
NM_001002297	571	601	cds
NM_001002297	602	631	cds
NM_001002297	1311	1339	cds
NM_001002297	1341	1369	cds
NM_001002297	1401	1429	cds
NM_001002297	1431	1459	cds
NM_001002297	1541	1571	cds
NM_001002297	1572	1601	cds
NM_001002297	1641	1671	cds
NM_001002297	1672	1701	cds
NM_001002297	1741	1771	utr3
NM_001002297	1772	1801	utr3
NM_001002298	81	109	utr5
NM_001002298	121	149	utr5
NM_001002298	121	149	cds
NM_001002298	161	189	cds
NM_001002298	201	231	cds
NM_001002298	232	261	cds
NM_001002298	301	331	cds
NM_001002298	421	451	cds
NM_001002298	452	481	cds
NM_001002298	581	609	cds
NM_001002298	611	639	cds
NM_001002298	761	789	cds
NM_001002298	901	929	cds
NM_001002298	941	969	cds
NM_001002298	1111	1139	cds
NM_001002298	1151	1179	utr3
NM_001002298	1151	1179	cds
NM_001002298	1221	1249	utr3
NM_001002298	1341	1369	utr3
NM_001002298	1481	1509	utr3
NM_001002298	1591	1619	utr3
NM_001002298	1861	1889	utr3
NM_001002298	2061	2091	utr3
NM_001002298	2101	2131	utr3
NM_001002298	2171	2201	utr3
NM_001002298	2481	2509	utr3
NM_001002298	2541	2569	utr3
NM_001002298	2691	2719	utr3
NM_001002298	2821	2849	utr3
NM_001002298	3171	3199	utr3
NM_001002298	3241	3271	utr3
NM_001002298	3451	3479	utr3
NM_001002300	91	119	utr5
NM_001002300	121	149	utr5
NM_001002300	961	989	cds
NM_001002300	1161	1189	cds
NM_001002300	1191	1219	cds
NM_001002300	1281	1309	cds
NM_001002300	1421	1449	cds
NM_001002300	1611	1639	cds
NM_001002300	1831	1861	cds
NM_001002300	1862	1891	cds
NM_001002300	1892	1921	cds
NM_001002300	1922	1951	cds
NM_001002300	2151	2179	utr3
NM_001002300	2191	2219	utr3
NM_001002300	2251	2279	utr3
NM_001002300	2281	2309	utr3
NM_001002300	2511	2539	utr3
NM_001002304	111	141	cds
NM_001002304	142	171	cds
NM_001002304	321	349	cds
NM_001002304	611	639	cds
NM_001002304	651	679	cds
NM_001002304	781	809	cds
NM_001002304	1071	1099	cds
NM_001002304	1571	1599	utr3
NM_001002304	1651	1679	utr3
NM_001002304	1701	1731	utr3
NM_001002304	2001	2031	utr3
NM_001002304	2032	2061	utr3
NM_001002304	2091	2119	utr3
NM_001002304	2271	2299	utr3
NM_001002304	2361	2389	utr3
NM_001002315	251	279	utr5
NM_001002315	511	539	cds
NM_001002315	721	751	cds
NM_001002315	752	781	cds
NM_001002315	791	819	cds
NM_001002315	961	989	cds
NM_001002315	1171	1199	cds
NM_001002315	1881	1911	utr3
NM_001002315	1941	1969	utr3
NM_001002315	1991	2019	utr3
NM_001002315	2021	2051	utr3
NM_001002315	2052	2081	utr3
NM_001002315	2082	2111	utr3
NM_001002316	101	129	utr5
NM_001002316	131	159	utr5
NM_001002316	541	569	cds
NM_001002316	591	619	cds
NM_001002316	901	929	cds
NM_001002316	1001	1029	cds
NM_001002316	1031	1061	cds
NM_001002316	1062	1091	cds
NM_001002316	1701	1729	utr3
NM_001002316	1771	1799	utr3
NM_001002316	1851	1881	utr3
NM_001002316	1882	1911	utr3
NM_001002316	2011	2039	utr3
NM_001002316	2061	2089	utr3
NM_001002317	11	41	utr5
NM_001002317	42	71	utr5
NM_001002317	111	141	cds
NM_001002317	142	171	cds
NM_001002317	201	229	cds
NM_001002317	251	279	cds
NM_001002317	291	319	cds
NM_001002317	341	369	cds
NM_001002317	371	401	cds
NM_001002317	431	459	cds
NM_001002317	501	529	cds
NM_001002320	461	489	cds
NM_001002320	961	989	utr3
NM_001002320	1131	1159	utr3
NM_001002320	1461	1489	utr3
NM_001002320	1501	1529	utr3
NM_001002320	1611	1639	utr3
NM_001002320	1731	1759	utr3
NM_001002320	1791	1821	utr3
NM_001002320	1822	1851	utr3
NM_001002320	1881	1911	utr3
NM_001002320	2191	2219	utr3
NM_001002321	191	219	cds
NM_001002321	541	569	cds
NM_001002321	691	719	cds
NM_001002321	841	869	cds
NM_001002321	1191	1221	utr3
NM_001002321	1222	1251	utr3
NM_001002321	1311	1339	utr3
NM_001002322	2261	2289	cds
NM_001002322	2361	2389	cds
NM_001002322	2571	2599	utr3
NM_001002322	2571	2599	cds
NM_001002322	2601	2631	utr3
NM_001002322	2632	2661	utr3
NM_001002323	71	99	utr5
NM_001002323	591	619	utr3
NM_001002324	1151	1179	utr3
NM_001002324	1251	1279	utr3
NM_001002324	1471	1499	utr3
NM_001002333	51	79	utr5
NM_001002333	211	239	utr5
NM_001002333	381	409	cds
NM_001002333	441	469	cds
NM_001002333	531	559	cds
NM_001002333	881	909	cds
NM_001002333	981	1011	cds
NM_001002333	1061	1089	cds
NM_001002333	1121	1151	cds
NM_001002333	1152	1181	utr3
NM_001002333	1152	1181	cds
NM_001002333	1351	1379	utr3
NM_001002333	1471	1499	utr3
NM_001002335	1	31	utr5
NM_001002335	32	61	utr5
NM_001002335	32	61	cds
NM_001002335	81	109	cds
NM_001002335	111	139	cds
NM_001002335	151	181	cds
NM_001002335	182	211	cds
NM_001002335	211	241	cds
NM_001002335	242	271	cds
NM_001002335	301	331	cds
NM_001002335	332	361	cds
NM_001002335	371	399	cds
NM_001002335	411	441	cds
NM_001002335	481	509	cds
NM_001002335	531	559	cds
NM_001002335	891	919	cds
NM_001002335	1041	1069	cds
NM_001002335	1091	1119	cds
NM_001002335	1291	1319	cds
NM_001002335	1431	1459	cds
NM_001002335	1511	1539	cds
NM_001002335	1621	1651	utr3
NM_001002335	1621	1651	cds
NM_001002335	1652	1681	utr3
NM_001002335	1701	1729	utr3
NM_001002337	531	559	cds
NM_001002337	641	669	cds
NM_001002337	1151	1181	utr3
NM_001002339	1151	1179	utr3
NM_001002341	101	131	cds
NM_001002341	251	279	cds
NM_001002341	341	369	cds
NM_001002341	411	439	cds
NM_001002341	451	479	cds
NM_001002341	601	629	cds
NM_001002341	741	769	cds
NM_001002341	821	849	cds
NM_001002341	1101	1129	utr3
NM_001002341	1101	1129	cds
NM_001002341	1241	1271	utr3
NM_001002341	1272	1301	utr3
NM_001002342	271	299	cds
NM_001002342	491	521	cds
NM_001002342	522	551	cds
NM_001002342	871	899	cds
NM_001002342	951	979	cds
NM_001002342	1001	1029	cds
NM_001002342	1181	1211	cds
NM_001002342	1331	1359	cds
NM_001002342	1651	1679	utr3
NM_001002342	1651	1679	cds
NM_001002342	1741	1769	utr3
NM_001002342	1881	1911	utr3
NM_001002342	1912	1941	utr3
NM_001002353	71	99	cds
NM_001002353	121	149	cds
NM_001002353	291	321	cds
NM_001002353	322	351	cds
NM_001002353	391	419	cds
NM_001002353	651	679	cds
NM_001002353	711	739	cds
NM_001002353	741	769	cds
NM_001002353	821	851	cds
NM_001002353	852	881	cds
NM_001002353	951	979	cds
NM_001002353	1021	1049	utr3
NM_001002353	1021	1049	cds
NM_001002353	1141	1169	utr3
NM_001002353	1171	1199	utr3
NM_001002355	101	129	cds
NM_001002355	181	209	cds
NM_001002355	221	249	cds
NM_001002355	281	311	cds
NM_001002355	312	341	cds
NM_001002355	571	599	cds
NM_001002355	641	669	cds
NM_001002355	691	721	cds
NM_001002355	722	751	cds
NM_001002355	821	849	cds
NM_001002355	941	969	cds
NM_001002355	1071	1099	cds
NM_001002355	1191	1219	cds
NM_001002355	1341	1369	cds
NM_001002355	1451	1479	cds
NM_001002355	1561	1589	cds
NM_001002355	1711	1741	cds
NM_001002355	1742	1771	cds
NM_001002355	1811	1841	cds
NM_001002355	1842	1871	cds
NM_001002355	2041	2069	cds
NM_001002356	701	729	cds
NM_001002356	731	759	cds
NM_001002356	771	799	cds
NM_001002360	1471	1499	utr3
NM_001002360	1531	1559	utr3
NM_001002364	71	99	utr5
NM_001002364	391	419	cds
NM_001002364	421	449	cds
NM_001002364	461	489	cds
NM_001002364	531	561	cds
NM_001002364	611	639	cds
NM_001002364	641	669	cds
NM_001002364	721	749	cds
NM_001002364	771	801	utr3
NM_001002364	771	801	cds
NM_001002364	802	831	utr3
NM_001002364	1081	1109	utr3
NM_001002366	421	449	cds
NM_001002366	481	509	cds
NM_001002366	941	969	cds
NM_001002366	1021	1049	cds
NM_001002366	1091	1121	cds
NM_001002366	1122	1151	cds
NM_001002370	81	111	utr5
NM_001002370	112	141	utr5
NM_001002370	531	559	cds
NM_001002370	1221	1249	utr3
NM_001002373	1161	1189	utr3
NM_001002374	101	129	utr5
NM_001002374	171	199	cds
NM_001002374	321	351	cds
NM_001002374	352	381	cds
NM_001002374	382	411	cds
NM_001002374	521	549	cds
NM_001002374	561	589	cds
NM_001002374	881	909	cds
NM_001002374	1001	1029	cds
NM_001002374	1121	1151	cds
NM_001002374	1171	1199	cds
NM_001002374	1201	1229	cds
NM_001002374	1401	1429	cds
NM_001002374	1571	1599	cds
NM_001002374	1671	1699	cds
NM_001002374	1721	1751	utr3
NM_001002374	1752	1781	utr3
NM_001002374	1782	1811	utr3
NM_001002374	1821	1849	utr3
NM_001002374	1921	1951	utr3
NM_001002374	1952	1981	utr3
NM_001002374	1982	2011	utr3
NM_001002374	2001	2029	utr3
NM_001002374	2051	2079	utr3
NM_001002375	161	189	cds
NM_001002375	191	219	cds
NM_001002375	221	249	cds
NM_001002375	381	409	cds
NM_001002375	1091	1119	utr3
NM_001002375	1091	1119	cds
NM_001002375	1161	1189	utr3
NM_001002375	1231	1259	utr3
NM_001002376	21	49	utr5
NM_001002376	61	89	utr5
NM_001002376	261	289	cds
NM_001002376	321	349	cds
NM_001002376	351	379	cds
NM_001002376	391	421	cds
NM_001002376	431	459	cds
NM_001002376	461	489	cds
NM_001002376	491	521	cds
NM_001002376	522	551	cds
NM_001002376	641	669	cds
NM_001002376	681	709	cds
NM_001002376	831	859	cds
NM_001002376	871	901	cds
NM_001002376	911	939	cds
NM_001002376	981	1011	cds
NM_001002376	1012	1041	cds
NM_001002376	1041	1069	cds
NM_001002376	1641	1671	utr3
NM_001002376	1721	1749	utr3
NM_001002378	101	131	utr5
NM_001002378	132	161	utr5
NM_001002378	132	161	cds
NM_001002378	231	261	cds
NM_001002378	571	601	cds
NM_001002378	602	631	cds
NM_001002378	661	689	utr3
NM_001002378	661	689	cds
NM_001002378	701	729	utr3
NM_001002378	791	821	utr3
NM_001002378	822	851	utr3
NM_001002380	1641	1671	cds
NM_001002380	1672	1701	utr3
NM_001002380	1672	1701	cds
NM_001002382	271	299	cds
NM_001002382	301	329	cds
NM_001002382	651	679	cds
NM_001002382	761	791	cds
NM_001002382	792	821	cds
NM_001002382	1041	1069	cds
NM_001002382	1081	1109	cds
NM_001002382	1311	1339	utr3
NM_001002382	1311	1339	cds
NM_001002384	21	51	utr5
NM_001002384	52	81	utr5
NM_001002384	52	81	cds
NM_001002384	151	181	cds
NM_001002384	182	211	cds
NM_001002384	281	309	cds
NM_001002384	361	389	cds
NM_001002384	471	499	cds
NM_001002384	501	529	cds
NM_001002384	611	639	cds
NM_001002384	821	851	cds
NM_001002384	852	881	cds
NM_001002384	1171	1199	cds
NM_001002384	1241	1269	cds
NM_001002384	1271	1299	cds
NM_001002384	1321	1349	cds
NM_001002384	1791	1819	cds
NM_001002384	2011	2041	cds
NM_001002384	2042	2071	cds
NM_001002384	2091	2119	cds
NM_001002384	2141	2169	cds
NM_001002384	2321	2349	cds
NM_001002384	2351	2379	cds
NM_001002384	2421	2451	cds
NM_001002384	2452	2481	utr3
NM_001002384	2581	2609	utr3
NM_001002384	2621	2649	utr3
NM_001002386	311	339	cds
NM_001002386	341	369	cds
NM_001002386	541	569	cds
NM_001002386	621	649	cds
NM_001002386	691	719	cds
NM_001002386	741	769	cds
NM_001002386	811	839	cds
NM_001002386	931	959	cds
NM_001002386	991	1019	cds
NM_001002386	1061	1089	cds
NM_001002386	1101	1129	cds
NM_001002386	1151	1179	cds
NM_001002386	1241	1269	cds
NM_001002386	1331	1361	cds
NM_001002386	1362	1391	cds
NM_001002386	1391	1419	cds
NM_001002386	1421	1449	cds
NM_001002386	1561	1589	cds
NM_001002386	1681	1709	cds
NM_001002386	1741	1771	cds
NM_001002386	1991	2019	utr3
NM_001002386	2251	2279	utr3
NM_001002387	21	49	utr5
NM_001002387	61	89	cds
NM_001002387	461	489	cds
NM_001002387	491	519	cds
NM_001002387	671	699	cds
NM_001002387	711	739	cds
NM_001002387	1101	1129	utr3
NM_001002387	1151	1181	utr3
NM_001002387	1401	1429	utr3
NM_001002387	1581	1609	utr3
NM_001002387	1621	1651	utr3
NM_001002398	431	459	cds
NM_001002402	521	549	utr3
NM_001002402	521	549	cds
NM_001002402	791	819	utr3
NM_001002402	911	939	utr3
NM_001002411	51	79	cds
NM_001002411	211	239	cds
NM_001002411	251	279	cds
NM_001002411	311	341	cds
NM_001002411	342	371	cds
NM_001002411	481	509	cds
NM_001002411	531	559	cds
NM_001002411	561	589	cds
NM_001002411	951	981	utr3
NM_001002411	1091	1119	utr3
NM_001002416	471	499	cds
NM_001002416	591	619	cds
NM_001002416	641	669	cds
NM_001002416	1011	1041	utr3
NM_001002416	1042	1071	utr3
NM_001002416	1331	1359	utr3
NM_001002417	261	291	cds
NM_001002417	311	341	cds
NM_001002417	361	389	cds
NM_001002417	441	471	cds
NM_001002417	472	501	cds
NM_001002417	661	689	utr3
NM_001002417	741	769	utr3
NM_001002417	771	801	utr3
NM_001002417	802	831	utr3
NM_001002418	221	249	cds
NM_001002418	581	609	cds
NM_001002418	671	699	cds
NM_001002418	751	779	utr3
NM_001002419	71	99	utr5
NM_001002419	721	749	cds
NM_001002419	1401	1429	cds
NM_001002419	1691	1719	cds
NM_001002419	2161	2189	utr3
NM_001002419	2161	2189	cds
NM_001002419	2191	2219	utr3
NM_001002419	2321	2349	utr3
NM_001002419	2481	2509	utr3
NM_001002421	181	211	cds
NM_001002421	341	369	cds
NM_001002421	671	699	cds
NM_001002422	1	31	utr5
NM_001002422	32	61	utr5
NM_001002422	141	169	utr5
NM_001002422	481	509	cds
NM_001002422	521	549	cds
NM_001002422	581	609	cds
NM_001002422	631	661	cds
NM_001002422	671	699	utr3
NM_001002422	671	699	cds
NM_001002422	891	921	utr3
NM_001002422	922	951	utr3
NM_001002422	941	969	utr3
NM_001002422	981	1009	utr3
NM_001002422	1011	1039	utr3
NM_001002422	1041	1069	utr3
NM_001002427	31	59	utr5
NM_001002427	241	269	cds
NM_001002427	281	311	cds
NM_001002427	341	371	cds
NM_001002427	372	401	cds
NM_001002427	401	431	utr3
NM_001002427	401	431	cds
NM_001002433	21	49	utr5
NM_001002433	91	121	utr5
NM_001002433	161	189	cds
NM_001002433	291	319	cds
NM_001002433	321	349	cds
NM_001002433	391	419	cds
NM_001002433	451	479	cds
NM_001002433	541	569	cds
NM_001002433	611	639	cds
NM_001002433	1011	1039	utr3
NM_001002435	21	51	utr5
NM_001002435	111	141	cds
NM_001002435	291	319	cds
NM_001002435	431	459	cds
NM_001002435	471	499	cds
NM_001002435	591	621	cds
NM_001002435	622	651	cds
NM_001002435	1001	1029	utr3
NM_001002436	81	109	utr5
NM_001002436	421	449	cds
NM_001002436	871	899	utr3
NM_001002438	1	31	utr5
NM_001002438	32	61	utr5
NM_001002438	161	189	cds
NM_001002438	251	279	cds
NM_001002438	321	351	cds
NM_001002438	371	399	cds
NM_001002438	451	479	utr3
NM_001002438	491	519	utr3
NM_001002440	21	49	utr5
NM_001002440	211	239	cds
NM_001002440	471	499	utr3
NM_001002440	531	559	utr3
NM_001002440	721	749	utr3
NM_001002440	821	849	utr3
NM_001002444	1251	1279	utr3
NM_001002445	321	349	cds
NM_001002445	391	419	cds
NM_001002445	521	549	cds
NM_001002445	551	581	cds
NM_001002445	582	611	cds
NM_001002445	612	641	cds
NM_001002445	642	671	utr3
NM_001002445	642	671	cds
NM_001002445	721	749	utr3
NM_001002445	761	789	utr3
NM_001002445	791	819	utr3
NM_001002445	851	879	utr3
NM_001002445	931	959	utr3
NM_001002448	31	59	utr5
NM_001002448	231	259	cds
NM_001002448	491	519	cds
NM_001002448	541	569	cds
NM_001002448	631	659	cds
NM_001002448	661	691	cds
NM_001002448	692	721	cds
NM_001002448	761	789	cds
NM_001002448	801	829	cds
NM_001002448	871	901	cds
NM_001002448	902	931	cds
NM_001002448	1021	1049	utr3
NM_001002448	1121	1149	utr3
NM_001002448	1341	1371	utr3
NM_001002448	1441	1471	utr3
NM_001002448	1472	1501	utr3
NM_001002449	111	139	cds
NM_001002449	201	229	cds
NM_001002449	351	379	cds
NM_001002449	721	749	utr3
NM_001002449	841	871	utr3
NM_001002449	872	901	utr3
NM_001002449	1081	1109	utr3
NM_001002449	1161	1189	utr3
NM_001002449	1251	1279	utr3
NM_001002451	51	79	utr5
NM_001002451	161	189	cds
NM_001002451	241	269	cds
NM_001002451	281	311	cds
NM_001002451	312	341	cds
NM_001002451	851	879	cds
NM_001002451	891	921	cds
NM_001002451	1241	1269	utr3
NM_001002453	1171	1199	utr3
NM_001002464	531	559	cds
NM_001002464	721	749	cds
NM_001002464	761	789	utr3
NM_001002464	801	829	utr3
NM_001002465	141	171	utr5
NM_001002465	141	171	cds
NM_001002465	181	209	cds
NM_001002465	401	431	cds
NM_001002465	432	461	utr3
NM_001002465	432	461	cds
NM_001002465	581	609	utr3
NM_001002465	611	641	utr3
NM_001002465	642	671	utr3
NM_001002465	661	689	utr3
NM_001002465	721	749	utr3
NM_001002465	801	829	utr3
NM_001002465	951	981	utr3
NM_001002465	982	1011	utr3
NM_001002465	1141	1169	utr3
NM_001002468	51	79	utr5
NM_001002468	251	279	cds
NM_001002468	281	311	cds
NM_001002468	312	341	cds
NM_001002468	441	471	cds
NM_001002468	671	699	cds
NM_001002468	731	759	utr3
NM_001002468	821	849	utr3
NM_001002468	911	939	utr3
NM_001002468	951	981	utr3
NM_001002468	982	1011	utr3
NM_001002473	121	149	cds
NM_001002473	341	369	cds
NM_001002473	381	409	cds
NM_001002473	611	641	utr3
NM_001002473	611	641	cds
NM_001002473	642	671	utr3
NM_001002473	721	749	utr3
NM_001002473	751	781	utr3
NM_001002473	801	831	utr3
NM_001002473	832	861	utr3
NM_001002477	71	99	cds
NM_001002477	171	199	cds
NM_001002477	201	229	cds
NM_001002477	341	369	cds
NM_001002477	601	629	cds
NM_001002477	931	959	utr3
NM_001002478	61	91	utr5
NM_001002478	92	121	utr5
NM_001002478	111	141	utr5
NM_001002478	142	171	utr5
NM_001002478	172	201	utr5
NM_001002478	172	201	cds
NM_001002478	202	231	cds
NM_001002478	232	261	cds
NM_001002478	261	291	cds
NM_001002478	321	349	cds
NM_001002478	351	381	cds
NM_001002478	391	419	cds
[truncated: 64,536 more rows]

## Sheet: hot_dsr_way2345
TransID	start(0-based)	end(0-based)
NM_200813	1541	1551
NM_198874	601	631
NM_214683	2721	2751
NM_001004499	2891	2911
NM_199872	1841	1851
NM_001082837	711	721
NM_213289	681	701
NM_199838	131	141
NM_152951	1061	1071
NR_132439	2761	2771
NM_200754	301	321
NM_213386	91	121
NM_001076559	4821	4841
NM_001199872	2661	2681
NM_201449	1271	1291
NM_001110467	1811	1821
NM_001115141	1331	1351
NM_001328035	531	551
NM_001128230	3191	3211
NM_001197329	291	311
NM_001079967	5571	5591
NM_001077600	791	811
NM_212586	391	411
NM_001077156	1371	1391
NM_001301331	4741	4751
NM_001270973	2411	2441
NM_001017735	681	711
NM_201486	2701	2721
NM_001077722	2651	2671
NM_001103142	551	571
NM_001326367	1341	1351
NM_001012313	2301	2311
NM_205559	521	541
NR_132439	1531	1561
NM_001114478	1051	1061
NM_214707	541	571
NM_001004551	421	431
NM_001326527	1081	1111
NM_001030094	1001	1021
NM_001199754	2321	2341
NM_200511	1291	1321
NM_001076745	491	511
NM_199770	421	431
NM_001080806	3881	3901
NM_131714	1041	1061
NM_214716	1581	1611
NM_173246	321	371
NM_214685	371	381
NM_131491	971	991
NM_001037222	111	121
NM_001044753	841	851
NM_213529	1391	1411
NM_199732	611	631
NM_001077296	1841	1861
NM_001039823	2371	2391
NM_001089491	271	291
NM_001037805	1801	1821
NM_001003883	1771	1781
NM_205639	2111	2131
NM_201083	1681	1701
NM_200976	7331	7341
NM_212731	621	631
NM_213231	1501	1511
NM_001017830	71	91
NM_213484	2391	2411
NM_001099343	1761	1801
NM_199758	1561	1581
NM_001077295	51	71
NM_001003624	611	621
NM_001077370	1231	1241
NM_213147	2271	2291
NM_200147	381	391
NM_001079951	6761	6771
NM_001005996	651	671
NM_199794	1391	1431
NM_001014301	1781	1801
NM_130941	1121	1131
NM_001002673	681	691
NM_130948	621	661
NM_001045125	3791	3811
NM_001100015	1221	1251
NM_205552	2761	2771
NM_200317	1801	1821
NM_001018150	1291	1311
NM_001127515	3771	3801
NM_001002055	1791	1821
NM_198802	661	681
NM_001005590	1031	1061
NM_001080070	761	771
NM_001003628	11	31
NM_001320203	1091	1111
NM_001002164	1021	1031
NM_001007346	571	581
NM_001256029	351	371
NM_001080563	171	191
NM_001003784	601	611
NM_001006014	581	601
NM_001004664	3341	3351
NM_001193674	4651	4681
NM_001089492	3471	3481
NM_001017792	771	781
NM_001327759	5311	5331
NM_001328509	1861	1881
NM_001020472	1181	1191
NM_200739	191	211
NM_001100012	641	651
NM_199860	1781	1801
NM_001328276	3151	3171
NM_001045076	1971	1991
NM_200156	1881	1901
NM_001048149	411	441
NM_001005992	121	141
NM_001044938	1421	1431
NM_001003411	1171	1181
NM_181330	1991	2001
NM_001029958	3011	3041
NM_001083544	101	121
NM_001042730	2521	2531
NM_001017833	821	841
NM_001007319	1601	1631
NM_001328091	301	311
NM_131503	1111	1131
NM_001003538	481	501
NM_212613	211	221
NM_001033721	3861	3881
NM_199577	1611	1641
NM_001328592	3321	3371
NM_214796	891	901
NM_001122844	2731	2741
NM_198366	1061	1071
NM_001017836	351	361
NM_001130776	1951	1961
NM_199818	1771	1791
NM_001328550	71	91
NM_131491	1671	1681
NR_130148	2481	2491
NM_001328553	1581	1591
NM_001289906	1701	1721
NM_001083005	1781	1801
NM_213138	941	961
NM_001017674	541	571
NM_001012501	1831	1841
NM_200076	2351	2361
NM_001243151	651	661
NM_001081749	1141	1151
NM_205541	81	91
NM_001002592	871	881
NM_001006051	721	731
NM_212777	1541	1551
NM_201099	1851	1871
NM_001004528	2391	2431
NM_001127334	1111	1141
NM_200902	2681	2691
NM_198356	1821	1841
NM_001146097	1661	1671
NM_213319	1141	1161
NM_200545	1271	1281
NM_001309845	791	821
NM_001001944	2331	2351
NM_200135	631	651
NM_001076575	2181	2191
NM_001003507	41	51
NM_001128530	2711	2731
NM_001025506	751	771
NM_001142592	4401	4441
NM_201190	1381	1391
NM_001044341	811	821
NM_201463	1011	1041
NM_001109706	441	471
NM_001089380	1131	1141
NM_199972	2051	2071
NM_213219	91	101
NM_213262	1101	1131
NM_001007175	1131	1151
NM_199917	611	641
NM_194402	411	431
NM_001159819	351	371
NM_201172	581	601
NM_001045064	3111	3121
NM_199745	1321	1341
NM_212973	2311	2341
NM_201010	921	941
NM_212659	691	711
NM_001007335	1651	1661
NM_001126477	4611	4671
NM_001080064	701	721
NM_001089547	1371	1381
NM_200319	751	781
NM_001077763	5471	5481
NM_200343	301	321
NM_001003596	231	261
NM_213499	631	641
NM_205538	1261	1271
NM_001324455	3601	3631
NM_001024425	1021	1041
NM_001100145	1021	1041
NM_199569	331	351
NM_212995	1691	1701
NM_001003835	4311	4341
NM_001002324	771	791
NM_152979	1761	1771
NM_001103135	981	1001
NM_001346284	2571	2591
NM_001288652	5031	5041
NM_001020637	111	141
NM_001030259	1731	1771
NM_001076556	1631	1641
NM_201587	751	791
NM_001003836	461	491
NM_001017764	1421	1451
NM_001163995	881	911
NM_001100145	2221	2231
NM_212786	1261	1271
NM_001076745	181	201
NM_001076615	691	721
NM_001083015	1891	1931
NM_201160	1201	1211
NM_200275	811	821
NM_213434	1001	1031
NM_001083552	261	281
NM_200978	3811	3821
NM_001076749	31	61
NM_182860	2021	2031
NM_001024817	881	901
NM_001045224	91	101
NM_001020714	1991	2021
NM_001007182	971	991
NM_001008575	2281	2291
NM_001013490	1121	1131
NM_212684	2811	2821
NM_199933	121	151
NM_001024462	521	531
NM_001007382	1481	1501
NM_001328692	71	81
NM_001353917	651	691
NM_199431	2141	2151
NM_182881	1601	1611
NM_001045323	791	831
NM_001002864	1421	1431
NM_001007765	1781	1801
NM_199986	1271	1281
NM_205686	1181	1211
NM_001145584	12471	12481
NM_001122747	2361	2381
NM_001313750	1751	1771
NM_200167	101	141
NM_001326382	801	821
NM_199684	181	191
NM_001045164	1101	1111
NM_001128523	6831	6881
NM_001015059	41	51
NM_201203	1051	1071
NM_001326547	1961	1971
NM_001100094	1481	1501
NM_001346290	10441	10461
NM_001003523	601	621
NM_145118	3731	3741
NM_200702	331	361
NM_001100044	571	591
NM_001204157	1841	1851
NM_001045419	1871	1891
NM_001017718	321	341
NM_201321	571	581
NM_199732	1221	1261
NM_001017696	691	701
NM_213166	721	731
NM_001346290	8301	8371
NM_205716	2131	2151
NM_001030061	4691	4701
NM_212685	381	391
NM_001002127	111	131
NM_001017819	1781	1811
NM_001328370	3041	3061
NM_001017882	601	621
NM_001044793	2951	2991
NM_001077164	401	421
NM_200309	1341	1361
NM_205652	721	731
NM_183069	331	341
NM_001202416	1521	1541
NM_200621	1361	1371
NM_201479	1781	1791
NM_001025515	241	251
NM_001002364	421	441
NM_200380	411	421
NM_200089	3491	3521
NM_199805	1601	1621
NM_001159914	1851	1871
NM_001044767	681	701
NM_001083812	4201	4211
NM_212725	961	971
NM_199846	1191	1201
NM_001089347	281	291
NM_001282090	481	501
NM_001045189	71	101
NM_200885	2041	2061
NM_001004649	551	561
NM_001082994	3901	3911
NM_201012	1391	1401
NM_001037419	1371	1391
NM_001002402	531	541
NM_001002864	721	741
NM_001098740	1011	1041
NM_173268	851	861
NM_001082828	321	331
NM_001003642	1201	1211
NM_001082814	171	201
NM_200655	741	771
NM_001123234	1371	1381
NM_001076569	451	481
NM_001025165	1181	1211
NM_001326472	1341	1351
NM_200321	1331	1351
NM_001328190	821	851
NM_213490	991	1011
NM_001044762	781	791
NM_001291329	1851	1861
NM_200151	1181	1201
NM_001012366	421	441
NM_001110480	2421	2441
NM_001044929	791	801
NM_001076629	851	861
NM_001003988	1341	1351
NM_001347668	6751	6761
NM_001002339	521	531
NM_001115141	1641	1651
NM_001077792	1801	1851
NM_199763	2251	2271
NM_214814	4351	4371
NM_001130192	1011	1041
NM_001005604	2291	2311
NM_001045288	1721	1751
NM_214708	381	391
NM_001014334	2531	2541
NM_001077329	791	811
NM_001002180	2071	2081
NM_200317	2601	2621
NM_200257	2671	2701
NM_001201360	1851	1861
NM_001045241	1471	1491
NM_001003538	171	191
NM_201090	21	41
NM_001080596	2481	2511
NM_213489	921	931
NM_001044891	1561	1591
NM_213363	1151	1181
NM_001025538	921	931
NM_001146097	2101	2121
NM_199839	851	861
NM_001005931	1671	1691
NM_001037423	1101	1141
NM_200183	2421	2431
NM_199922	3301	3321
NM_001327852	941	951
NM_200394	2011	2031
NM_200848	291	311
NM_001126406	1531	1561
NM_001191020	3571	3601
NM_001001840	2841	2871
NM_001326445	6031	6051
NM_001328258	2381	2391
NM_001013519	431	441
NM_001076569	621	641
NM_001204132	4001	4021
NM_212588	1321	1351
NM_131366	651	671
NM_212599	2261	2271
NM_212564	331	351
NM_001305555	211	231
NM_001002697	171	181
NM_213059	1911	1931
NM_001301358	1531	1541
NM_001020602	2371	2381
NM_001020474	761	781
NM_001309640	281	291
NM_197934	1801	1811
NM_214714	891	931
NM_001020815	601	611
NM_001040321	591	601
NM_001080015	3601	3621
NM_213371	1651	1681
NM_212832	1111	1131
NM_200164	1111	1131
NM_001003515	251	311
NM_001044846	1511	1531
NM_001302222	2811	2821
NM_212647	1961	2011
NM_001044907	1021	1031
NM_199955	581	601
NM_001243875	1041	1051
NM_001005967	81	101
NM_001007333	251	261
NM_200685	1341	1361
NM_001077329	1571	1611
NM_001002041	241	261
NM_200256	3151	3161
NM_001039062	2781	2791
NM_001089489	1591	1611
NM_001002440	711	741
NM_001308966	4191	4201
NM_212726	681	691
NM_213141	931	951
NM_001077541	2451	2471
NM_001103112	301	311
NM_200673	601	621
NM_198908	2131	2151
NM_001076727	1781	1791
NM_001301331	4031	4041
NM_212764	281	301
NM_001312659	2601	2611
NM_212927	111	121
NM_001003867	281	291
NM_001004645	821	851
NM_001312897	3261	3281
NM_213465	3421	3431
NM_213048	1481	1491
NM_001044809	3231	3251
NM_001003650	511	531
NM_001044993	1861	1891
NM_001007770	21	41
NM_200045	961	971
NM_001002608	161	171
NM_001308825	2551	2571
NM_001002717	1091	1101
NM_001003734	401	431
NM_001077738	2321	2331
NM_001111207	841	861
NM_001013533	991	1011
NM_214695	131	151
NM_212582	3401	3411
NM_201059	1391	1411
NM_213038	3191	3201
NM_001099251	891	921
NM_001002733	1831	1851
NM_001083833	1601	1611
NM_200106	471	491
NM_212995	731	761
NM_212703	521	531
NM_001004527	441	451
NM_001002120	1861	1881
NM_001045056	511	531
NM_001122785	831	851
NM_131427	1781	1791
NM_001326426	1801	1811
NM_001037377	1641	1651
NM_001044793	2081	2121
NM_001012487	4341	4361
NM_001002200	731	751
NM_200467	991	1001
NM_001164028	631	641
NM_200446	971	981
NM_001110412	801	821
NM_212802	1691	1721
NM_173244	731	741
NM_001126423	3201	3211
NM_212808	2991	3021
NM_001007440	1611	1661
NM_001111175	51	61
NM_199673	2181	2191
NM_001305467	1591	1631
NM_199275	411	421
NM_201273	1111	1131
NM_200892	721	731
NM_200310	1331	1341
NM_001326696	3611	3641
NM_001002221	841	851
NM_001030260	251	271
NM_001305594	931	951
NM_001006076	111	131
NM_200012	651	681
NM_001202437	781	791
NM_001256780	131	151
NM_213227	3281	3321
NM_001008646	2181	2191
NM_001114590	2651	2661
NM_201482	571	581
NM_001130621	971	991
NM_001003547	1131	1141
NM_213235	1431	1461
NM_200919	161	171
NM_001278254	3661	3671
NM_001045288	1191	1211
NM_200258	241	261
NM_212678	1761	1771
NM_213139	1411	1421
NM_001115141	1061	1081
NM_001316890	1721	1741
NM_199517	1771	1821
NM_001160156	1751	1761
NM_213186	2341	2361
NM_201448	1271	1281
NM_200152	1851	1861
NM_001243172	171	181
NM_213515	261	281
NM_001003570	361	371
NM_001020709	11	41
NM_001009989	3011	3041
NM_173241	291	311
NM_001007435	1311	1331
NM_131145	751	761
NM_200976	851	871
NM_001076629	731	741
NM_001020549	2611	2641
NM_001199871	1891	1921
NM_200727	281	301
NM_001077760	871	881
NM_001159911	541	561
NM_001004594	971	981
NM_199882	2151	2161
NM_001327755	3161	3191
NM_001045076	1931	1961
NM_001002733	1971	1981
NM_001115095	2921	2931
NM_001130604	651	671
NM_200164	3011	3031
NM_200181	611	651
NM_213227	3241	3261
NM_212609	301	321
NM_001080190	2161	2181
NM_199708	561	571
NM_001003439	491	511
NM_001006031	1471	1481
NM_001002705	1661	1681
NM_199745	1161	1181
NM_200076	711	731
NM_207086	1561	1571
NM_200020	751	781
NM_001145786	2731	2741
NM_001102475	1601	1611
NM_001104936	1511	1521
NM_200982	71	111
NM_213243	941	951
NM_001080686	61	81
NM_001037667	1691	1701
NM_001030063	351	371
NM_178436	2281	2301
NM_200583	1701	1721
NM_001031673	1041	1091
NM_001347671	2151	2171
NM_145118	911	961
NM_200402	1251	1271
NM_199333	2001	2031
NM_001312659	301	331
NM_001020524	1051	1061
NM_212569	1591	1621
NR_102288	651	681
NM_201094	901	911
NM_001006048	731	751
NM_001012487	2751	2771
NM_173835	641	661
NM_001328258	2401	2431
NM_194391	271	281
NM_001020479	4051	4061
NM_198980	331	341
NM_001114912	1231	1261
NM_173273	1051	1071
NM_131524	811	821
NM_001327986	1491	1511
NM_001007323	641	661
NM_001089352	651	661
NM_001002342	1491	1501
NM_001089384	2391	2411
NM_199818	921	931
NM_001123236	1091	1111
NM_212723	991	1001
NM_001079969	831	851
NM_001305596	451	461
NM_199614	1951	1971
NM_001040348	2591	2631
NM_214772	851	871
NM_001326547	4501	4531
NM_001007776	231	251
NM_201481	1301	1311
NM_001002042	1971	1981
NM_001146097	2711	2731
NM_001018150	1451	1461
NM_001020547	1311	1341
NM_001083075	3891	3911
NM_001017565	561	571
NM_001002519	871	901
NM_001013569	381	391
NM_001018150	2201	2211
NM_001079963	1241	1251
NM_200270	601	611
NM_200405	2811	2821
NM_200673	801	811
NM_205595	1041	1061
NM_001045158	6791	6801
NM_001020697	1301	1321
NM_199793	1141	1161
NM_001002057	1061	1081
NM_173271	451	471
NM_199768	1711	1731
NM_200905	61	91
NM_001077537	1711	1721
NM_001077393	2671	2691
NM_200892	341	351
NM_001105588	1931	1971
NM_001105694	851	861
NM_201290	1721	1741
NM_001039883	391	411
NM_131031	871	901
NM_001122785	2831	2851
NM_130925	821	831
NM_201336	2611	2641
NM_001110225	2621	2631
NM_001076733	1061	1071
NM_200557	461	471
NM_001076559	2381	2391
NM_001305580	3621	3631
NM_001270571	1401	1421
NM_001113630	1521	1531
NM_001008732	181	191
NM_001037667	4031	4071
NM_001007445	1141	1171
NM_213448	3031	3051
NM_200987	1241	1271
NM_205766	1201	1231
NM_199575	1491	1511
NM_182967	121	131
NM_212644	4521	4541
NM_130990	481	491
NM_001008618	681	701
NM_001082838	251	261
NM_131256	1071	1101
NM_213211	91	121
NM_212961	321	351
NM_153660	1731	1751
NM_001123044	2141	2161
NM_001118893	9811	9821
NM_212684	1081	1091
NM_001003609	1981	1991
NM_205714	301	311
NM_001089428	461	471
NM_001030277	511	531
NM_001020600	571	591
NM_199902	671	681
NM_001077724	2261	2291
NM_001044799	321	351
NM_001030074	761	791
NM_001114556	2541	2561
NM_200866	1581	1591
NM_199991	1491	1501
NM_200595	391	401
NM_001309527	771	781
NM_212665	1121	1161
NM_200659	1871	1901
NM_001316989	1191	1201
NM_001003640	141	161
NM_200270	731	751
NM_200366	281	291
NM_001004001	1921	1931
NM_199713	1721	1731
NM_001006057	61	81
NM_131210	3781	3801
NM_198808	1711	1741
NM_001044818	1881	1901
NM_001301328	1201	1221
NM_001099739	2901	2921
NM_001347739	3281	3301
NM_001313841	6981	7001
NM_001327786	4251	4261
NM_213350	521	531
NM_001199871	2011	2031
NM_001030125	1821	1831
NM_200003	1661	1671
NM_001002420	601	611
NM_001006024	951	961
NM_001001940	171	181
NM_131780	131	151
NM_001316890	2321	2331
NM_131206	771	791
NM_001030123	2421	2441
NM_001008577	701	721
NM_200360	851	881
NM_212585	1811	1821
NM_001164029	1191	1211
NM_001020629	221	231
NM_001128538	621	641
NM_001020535	641	661
NM_001313699	981	991
NM_001100028	4501	4511
NM_001044317	791	801
NM_001329981	2811	2821
NM_001044848	51	61
NM_201089	2951	2971
NM_001115144	1041	1061
NM_001080197	1941	1961
NM_212916	1331	1341
NM_201194	381	391
NM_201033	2031	2051
NM_199985	1001	1011
NR_137174	2611	2621
NM_131390	1791	1801
NM_001008575	1351	1371
NM_001114429	1901	1911
NM_205600	311	331
NM_001122749	711	721
NM_001080605	1711	1731
NM_200431	841	851
NM_001030074	3771	3781
NM_200259	771	791
NM_207069	811	831
NM_001008589	2531	2581
NM_001034977	1221	1251
NM_001002873	1071	1091
NM_001007445	1291	1311
NM_213191	421	451
NM_001044310	2961	2991
NM_001077778	111	131
NM_001291329	51	71
NM_001080166	911	921
NM_200230	1511	1551
NM_199674	2091	2101
NM_001017902	71	91
NM_131503	3811	3821
NM_001076631	1111	1131
NM_201450	2921	2941
NM_001326521	201	221
NM_200393	1581	1601
NM_001128545	5051	5071
NM_213446	1911	1921
NM_001309329	4211	4221
NM_001013519	971	991
NM_199526	2811	2831
NM_194407	201	231
NM_001083014	3701	3711
NM_131734	331	351
NM_001017793	691	711
NM_001077608	1421	1441
NM_200987	2141	2151
NM_001030212	3161	3191
NM_199997	861	871
NM_001037371	1261	1281
NM_001302466	261	271
NM_131524	1591	1601
NM_001326547	1801	1811
NM_001005778	701	711
NM_199894	1871	1891
NM_001004592	861	881
NM_001128334	641	651
NM_001145932	1171	1191
NM_001328045	3391	3411
NM_001017557	1711	1721
NM_212818	701	711
NM_212786	31	71
NM_001002423	611	641
NM_200002	71	81
NM_199972	1521	1541
NM_214756	2561	2571
NM_001099227	1161	1171
NM_001080184	1411	1421
NM_001076606	1791	1801
NM_001017630	541	571
NM_207057	2431	2481
NM_001136488	451	471
NM_001004572	1251	1271
NM_001003868	481	501
NM_001014289	3011	3031
NM_201069	361	401
NM_001305468	211	221
NM_001003420	801	811
NM_200451	1491	1501
NM_001301328	841	861
NM_001130783	111	131
NM_001017801	431	451
NM_200321	21	31
NM_001030239	1641	1671
NM_001045450	391	421
NM_213501	751	761
NM_001007435	1101	1131
NM_001312680	3171	3181
NM_131426	561	571
NM_201034	311	321
NM_199974	141	151
NM_001002157	1051	1071
NM_001007309	321	341
NM_001327809	1191	1241
NM_213333	1351	1361
NM_001079971	2681	2691
NM_201197	321	331
NM_213062	711	731
NM_001089542	521	561
NM_001079955	1501	1551
NM_199822	1131	1141
NM_131702	1171	1181
NM_201295	2041	2091
NM_001114426	2051	2081
NM_001077738	281	301
NM_001105526	211	231
NM_194373	1161	1171
NM_199872	1511	1541
NM_200912	561	571
NM_001030106	1441	1451
NM_213360	1521	1531
NM_200522	2731	2751
NM_173230	1621	1631
NM_212729	1711	1761
NM_001045105	1121	1141
NM_212898	351	361
NM_001079969	2241	2281
NM_001077583	1321	1351
NM_130990	911	931
NM_001042687	1401	1421
NR_135206	1641	1661
NM_200120	2571	2591
NM_001327799	651	681
NM_001256176	281	291
NM_001009914	841	861
NM_001327772	731	741
NM_001017844	721	741
NM_200055	1781	1801
NM_001320439	351	361
NM_001002620	1271	1281
NM_199883	1101	1121
NM_200257	421	431
NM_001007307	2791	2801
NM_001003596	531	541
NM_001077164	591	631
NM_001199755	1031	1051
NM_001190755	851	921
NM_212726	371	381
NM_001080600	651	661
NM_001042754	1451	1481
NM_001002333	931	941
NM_001111201	2431	2451
NM_001083028	1061	1101
NM_001002500	821	831
NM_178295	1961	1971
NM_001127515	4251	4281
NM_001326402	211	241
NM_001007402	1731	1741
NM_205641	941	951
NM_194432	781	801
NM_001030203	691	701
NM_181330	241	251
NM_201287	841	851
NM_200845	271	281
NM_001039062	1141	1151
NM_001002705	1231	1241
NM_001017764	481	501
NM_212630	411	421
NM_200157	161	211
NM_001128336	991	1011
NM_205716	1771	1791
NM_001256684	121	141
NM_001083826	611	621
NM_001079951	6671	6691
NM_001003599	1811	1821
NM_201459	371	391
NM_001326472	221	231
NM_001044891	731	751
NM_001111244	1001	1011
NM_001030286	1591	1601
NM_001077370	11	31
NM_200954	1921	1931
NM_001077599	2311	2381
NM_001002572	431	451
NM_001098777	2791	2811
NM_001025530	1001	1011
NM_001007337	1201	1221
NM_213434	1281	1321
NM_001004111	3381	3391
NM_199431	81	101
NM_001018165	1671	1741
NM_001030102	1931	1951
NM_200918	891	901
NM_001256028	491	501
NM_213196	1531	1551
NM_001136249	3601	3631
NM_001202479	831	841
NM_199782	111	131
NM_001301331	481	491
NM_131773	1281	1301
NM_212676	551	571
NM_001017604	1001	1011
NM_200571	2691	2731
NM_213393	1851	1891
NM_001020632	2321	2331
NM_001002673	1001	1011
NM_001002151	1951	1971
NM_200068	151	161
NM_212615	911	921
NM_200503	1641	1661
NM_001128702	531	551
NM_001200009	751	771
NM_201184	691	731
NM_001351711	3771	3781
NM_201075	1521	1571
NM_201303	1941	1951
NM_198821	1731	1741
NM_001320326	301	321
NM_001145555	2451	2471
NM_001089543	4121	4141
NM_001118893	9741	9761
NM_212660	1731	1741
NM_001003887	2471	2501
NM_001020700	3981	3991
NM_200976	5831	5841
NM_001044976	4171	4191
NM_001001400	2021	2031
NM_001020688	1111	1131
NM_001020696	1691	1711
NM_001098747	1571	1591
NM_001327857	531	571
NM_001003419	131	151
NM_131613	2871	2911
NM_001327941	3021	3031
NM_200261	2091	2121
NM_199997	531	551
NM_199932	1271	1291
NM_001002420	1411	1421
NM_213081	1711	1731
NM_001328580	1351	1381
NM_200183	2281	2301
NM_001328215	7891	7901
NM_001030285	1601	1621
NM_001077280	851	861
NM_213069	191	211
NM_001202437	1601	1621
NM_001024813	1831	1851
NM_001312897	1241	1251
NM_001024817	471	491
NM_131760	971	981
NM_001004554	1731	1741
NM_001003836	1751	1771
NM_213216	441	471
NM_201010	331	371
NM_001198753	311	331
NM_001122844	1091	1111
NM_213434	2201	2221
NM_001163779	4021	4031
NM_201507	1131	1141
NM_001008400	2941	2951
NM_001017577	141	171
NM_213411	2301	2321
NM_001347691	2151	2171
NM_001326532	1311	1321
NM_001037376	1711	1721
NM_201450	1381	1391
NM_201010	1291	1311
NM_001030063	1181	1201
NM_001003840	901	931
NM_001044313	3091	3111
NM_001114421	1561	1571
NM_205627	2261	2271
NM_001003743	651	661
NM_200598	511	531
NM_001044799	381	401
NM_207086	371	381
NM_001278180	881	931
NM_201288	4391	4401
NM_001076730	3001	3011
NM_214691	61	81
NM_212582	2511	2531
NM_199213	4051	4061
NM_001326493	251	271
NM_200312	101	121
NM_001024399	451	471
NM_001005953	451	471
NM_213155	931	951
NM_200309	1511	1541
NM_199729	151	161
NM_001122654	2511	2531
NM_200090	1111	1131
NM_205735	531	541
NM_001002300	2201	2211
NM_001002541	1451	1461
NM_131396	2121	2141
NM_001309329	4121	4141
NM_173243	1861	1901
NM_201125	1701	1721
NM_001025472	1271	1281
NM_131756	1461	1481
NM_214767	2781	2791
NM_212920	1921	1951
NM_001193543	4451	4471
NM_001309435	2711	2731
NM_001003885	151	161
NM_200966	1251	1281
NM_001002569	861	881
NM_199824	581	601
NM_001044986	2321	2341
NM_001039513	511	551
NM_194404	841	851
NM_199481	1521	1561
NM_200982	721	731
NM_001305574	1991	2011
NM_001126416	1101	1111
NM_001347671	4801	4831
NM_001002504	4551	4561
NM_131503	61	81
NM_001123252	1771	1791
NM_001007335	661	681
NM_001305594	711	721
NM_001014334	5261	5281
NM_001313822	2941	2951
NM_001014346	871	891
NM_001030064	851	871
NM_201465	1771	1811
NM_001200020	1931	1951
NM_212880	71	91
NM_001128238	1261	1271
NM_212822	2281	2291
NM_198806	1461	1471
NM_001007433	431	461
NM_198875	371	381
NR_130148	1911	1951
NM_199788	931	951
NM_200269	601	621
NM_001009989	661	671
NM_198921	531	551
NM_001347687	4101	4121
NM_001170819	1921	1941
NM_200002	851	871
NM_001031668	3411	3421
NM_001201420	861	881
NM_001328003	421	441
NM_001123323	591	601
NM_001289906	1161	1201
NM_001308831	1151	1161
NM_200239	2231	2251
NM_201097	2241	2261
NM_001110030	1311	1331
NM_212644	3571	3581
NM_001099237	551	571
NM_205665	1301	1311
NM_001030276	2791	2811
NM_213503	341	351
NM_001003863	941	971
NM_001077212	2701	2711
NM_001006021	1541	1561
NM_001001941	3541	3631
NM_001161447	7811	7821
NM_001002752	411	431
NM_199882	1741	1781
NR_137317	1391	1401
NM_201005	1171	1191
NM_001044774	791	811
NM_001128353	481	501
NM_001122749	291	311
NM_001160346	1341	1381
NM_001004554	331	351
NM_200942	1591	1601
NM_001045033	2141	2171
NM_001098740	451	461
NM_201315	111	121
NM_199834	921	941
NM_001002595	1641	1671
NM_200492	441	461
NM_001115123	1151	1181
NM_201113	491	511
NM_201308	2241	2261
NM_199617	711	721
NM_214768	3201	3211
NM_001290140	1551	1571
NM_001281468	5631	5651
NM_212569	1381	1391
NM_001347570	2791	2821
NM_199913	571	591
NM_001020599	1441	1451
NM_001007396	1241	1261
NM_144763	1881	1911
NM_001111178	1691	1711
NM_200517	601	621
NM_001001403	4041	4051
NM_001109848	1381	1401
NM_001017620	471	501
NM_212636	1511	1521
NM_001080057	3571	3591
NM_205718	1121	1141
NM_199530	3581	3601
NM_001002055	1041	1051
NM_001020486	331	351
NM_001145554	391	401
NM_001145932	1481	1491
NM_212665	2171	2191
NM_201207	1451	1461
NM_001045028	4721	4731
NM_001077805	441	461
NM_001044767	1741	1751
NM_001113796	1591	1601
NM_001020700	2141	2161
NM_001130591	2461	2471
NM_199672	1261	1271
NM_001098393	4311	4321
NM_001005992	771	781
NM_194373	1961	1971
NM_001083583	2871	2891
NM_001044991	1661	1671
NM_001007327	571	581
NM_200151	351	361
NM_001045426	91	101
NM_001033595	3751	3791
NM_200607	1301	1321
NM_181757	551	581
NM_001089448	1701	1721
NM_201307	1931	1961
NM_214748	81	101
NM_001077730	431	451
NM_200106	831	841
NM_001123257	4911	4951
NM_001082934	701	711
NM_181330	221	231
NM_212802	421	431
NM_194374	3321	3341
NM_001040351	251	271
NM_205735	3081	3101
NM_212652	1061	1071
NM_001327992	291	321
NM_214708	2521	2531
NM_001083554	2661	2691
NM_001102672	4331	4371
NM_001326705	2781	2791
NM_213077	1541	1551
NM_131673	311	321
NM_200273	31	51
NM_001099246	3541	3551
NM_001327851	2791	2801
NM_200078	1131	1151
NM_200065	411	421
NM_131189	4381	4401
NM_001020601	1471	1491
NM_212673	781	801
NM_001326540	581	591
NM_001123056	1501	1511
NM_001077768	2111	2131
NM_001271820	861	931
NM_199555	501	521
NM_212697	371	381
NM_001001822	81	101
NM_001077719	1061	1081
NM_200425	821	851
NM_194377	721	731
NM_130990	1041	1071
NM_001193327	3921	3941
NM_001278703	6391	6411
NM_001004592	2121	2131
NM_001013270	121	151
NM_201452	2161	2171
NM_213163	2901	2911
NM_001103198	341	351
NM_199931	891	911
NM_131456	601	621
NM_001044341	421	451
NM_001134362	261	281
NM_131331	421	461
NM_001077544	1021	1031
NM_001327862	1721	1741
NM_201084	2291	2311
NM_200073	2641	2661
NM_001328199	3701	3731
NM_001039994	1341	1351
NM_001037676	2061	2071
NM_001037432	411	431
NM_199542	421	441
NM_001243164	181	191
NM_001089415	1281	1301
NM_001045325	931	951
NM_001126435	1681	1701
NM_001282392	5281	5291
NM_001014355	1821	1841
NM_001082831	1731	1761
NM_170761	3131	3141
NM_199683	551	581
NM_001077730	401	421
NM_001328435	1221	1231
NM_001320439	2531	2551
NM_001289906	1271	1281
NM_199479	1761	1771
NM_205537	731	741
NM_200193	841	861
NM_001177447	2261	2271
NM_001256189	3631	3641
NM_001002602	1341	1371
NM_001199872	1291	1301
NM_131883	1771	1781
NM_001077613	821	841
NM_001012487	2821	2841
NM_178436	1601	1611
NM_213219	181	201
NM_200928	641	701
NM_001128671	831	871
NM_001302466	431	441
NM_213306	4281	4301
NM_001005401	1081	1091
NM_199860	161	181
NM_001128666	1661	1691
NM_001044867	301	321
NM_001313822	3791	3811
NM_200918	1451	1471
NM_212766	1681	1701
NM_001006056	381	401
NM_001258232	791	801
NM_001040307	921	951
NM_201084	1101	1111
NM_200246	481	491
NM_001089368	641	651
NM_001309368	1711	1731
NM_001201453	491	511
NM_213539	381	411
NM_001024812	21	101
NM_001002445	131	171
NM_001003547	4781	4791
NM_001020593	1121	1131
NM_213539	3551	3581
NM_001017898	1621	1631
NM_200208	271	281
NM_001003835	1951	1961
NM_001075106	2911	2921
NM_001005592	121	141
NM_001099248	2931	2951
NM_173244	1821	1831
NM_199277	1101	1121
NM_001030131	1141	1151
NM_001080176	871	891
NM_200378	831	851
NM_200915	571	591
NM_001012487	611	631
NM_001007440	2021	2061
NM_001002323	1251	1271
NM_001025485	1791	1811
NM_001114410	1511	1541
NM_001327862	3771	3791
NM_001017861	1051	1071
NM_001214910	2571	2591
NM_213433	1051	1071
NM_001079951	8061	8101
NM_001305664	1621	1631
NM_001103112	2551	2571
NM_001030065	2441	2451
NM_194407	631	641
NM_001130074	371	411
NM_001001823	2151	2161
NM_001003424	81	101
NM_001008612	1021	1071
NM_001003474	101	131
NM_212598	981	1041
NM_199972	2011	2041
NM_181559	11	21
NM_001030125	651	671
NM_131252	791	821
NM_212980	1401	1421
NM_001013263	761	781
NM_199639	491	521
NM_001040321	1021	1031
NM_199277	2051	2081
NM_001030125	691	751
NM_200070	981	991
NM_131780	731	761
NM_001003645	1501	1511
NM_001328116	1981	2031
NM_001025498	581	591
NM_001002541	1651	1671
NM_199946	2181	2191
NM_214746	81	101
NM_001003529	2101	2111
NM_001045064	4321	4341
NM_200286	751	761
NM_001002569	831	841
NM_001020617	801	811
NM_001320133	561	581
NM_200103	741	761
NM_200054	2981	2991
NM_001118896	921	941
NM_001113615	361	371
NM_131886	551	571
NM_001310040	1561	1601
NM_001114912	1341	1351
NM_001083028	781	801
NM_001115140	1171	1261
NM_201085	3141	3161
NM_212874	161	191
NM_212724	801	831
NM_213286	1401	1421
NM_001111150	1761	1771
NM_199700	1331	1341
NM_001083563	1141	1151
NM_001171585	741	751
NM_212787	1271	1281
NM_001326392	4371	4401
NM_131337	1891	1901
NM_001320428	1881	1891
NM_131722	881	891
NM_001110225	3201	3221
NM_001123044	471	491
NM_200622	3811	3821
NM_001020498	1451	1471
NM_001111281	541	561
NM_001346284	3571	3581
NM_001017718	3081	3091
NM_001045307	1641	1651
NM_214722	1031	1041
NM_198146	61	81
NM_001305595	4081	4101
NM_001025509	2421	2441
NM_001328016	871	881
NM_198368	1191	1221
NM_200012	701	721
NM_200922	1381	1391
NM_001080196	1251	1271
NM_001113609	361	381
NM_001044907	1131	1151
NM_001199436	1451	1471
NM_001007299	1231	1251
NM_001089469	1221	1241
NM_001002547	881	901
NM_001006101	1461	1481
NM_001145932	2821	2851
NM_001077759	1201	1221
NM_199759	991	1001
NM_200917	1161	1181
NM_212724	1331	1361
NM_001126390	1881	1901
NM_001003609	1041	1051
NM_199677	971	981
NM_001100947	281	301
NM_001076568	741	751
NM_001002448	231	251
NM_001082993	2211	2231
NM_001045469	1801	1821
NM_198371	1851	1861
NM_001020593	521	541
NM_213262	1421	1431
NM_001007372	571	581
NM_001077567	761	781
NM_200907	2101	2111
NM_200482	1181	1211
NM_001031838	971	991
NM_001003876	1481	1501
NM_200280	1381	1401
NM_212798	1491	1531
NM_001044972	1081	1111
NM_199729	451	501
NM_213318	1461	1481
NM_001004595	271	291
NM_130939	551	571
NM_001302640	71	81
NM_001003532	1271	1291
NM_212791	2081	2091
NM_212628	291	311
NM_001003420	1191	1221
NM_001002548	121	131
NM_200987	1281	1341
NM_201018	371	411
NM_212662	431	441
NM_001159971	481	501
NM_001007207	451	471
NM_199583	271	291
NM_001077763	291	301
NM_200022	1131	1141
NM_001077152	191	211
NM_001004588	1051	1061
NM_001127307	3381	3391
NM_001030212	5841	5891
NM_001082837	521	531
NM_001110030	1981	2001
NM_131524	2121	2131
NM_001077763	1511	1541
NM_201318	551	571
NM_131790	2061	2081
NM_001077738	2021	2041
NM_001202479	321	331
NM_212857	681	711
NM_205760	611	631
NM_001045358	591	601
NM_001013443	2591	2621
NM_001002868	2141	2161
NM_131465	1331	1341
NM_206888	1621	1631
NM_001080015	2251	2271
NM_001122784	861	891
NM_001001840	1801	1821
NM_001326713	3461	3491
NM_001105584	1041	1061
NM_001002416	1251	1281
NM_001080806	6891	6911
NM_213205	921	941
NM_001018105	2171	2181
NM_212576	1191	1211
NM_201466	251	261
NM_001256634	4421	4441
NM_001003872	1731	1741
NM_001004111	3661	3691
NM_001014816	1991	2011
NM_001002681	291	321
NM_200181	321	331
NM_001328587	1911	1941
NM_001328581	2701	2721
NM_200438	1411	1431
NM_214683	361	381
NM_201175	1991	2031
NM_001301360	1031	1051
NM_001080563	2491	2521
NM_199745	1601	1611
NM_001123299	1491	1511
NM_201450	511	551
NM_194396	661	691
NM_001003649	1221	1231
NM_001115133	491	521
NM_001327986	481	501
NM_001002057	311	321
NM_131578	2111	2121
NM_001004645	261	281
NM_001080656	1151	1161
NM_001291761	661	671
NM_001099977	1631	1651
NM_001346290	5341	5351
NM_213470	71	91
NM_199563	421	431
NM_001346290	5411	5421
NM_201449	2751	2761
NM_213067	141	181
NM_212946	661	671
NM_201206	1091	1111
NM_001347687	4431	4441
NM_001045142	691	701
NM_001077323	1811	1821
NM_200582	1161	1191
NM_198364	1001	1021
NM_001043323	401	431
NM_001044852	521	531
NM_001004560	1321	1341
NM_001328215	8181	8191
NM_199857	1701	1721
NM_001002602	1281	1301
NM_001327851	3001	3021
NM_200522	2831	2861
NM_001200040	501	511
NM_199846	31	61
NM_130994	771	791
NM_001002300	1251	1271
NM_001004597	2611	2621
NM_213039	1841	1851
NM_200662	51	71
NM_131722	431	441
NM_131520	7741	7761
NM_001007306	1741	1751
NM_001013544	471	511
NM_213505	2271	2311
NM_213365	1741	1751
NM_001017787	201	241
NM_001045049	731	741
NM_199429	1761	1771
NM_001002330	1821	1841
NM_001045067	1031	1051
NM_199597	2431	2441
NM_001111217	4691	4701
NM_001017883	601	611
NM_001128693	1251	1271
NM_200015	451	461
NM_213524	2411	2431
NM_001002503	2131	2151
NM_001256780	1181	1231
NM_212689	971	1001
NM_001013459	231	251
NM_212697	1091	1121
NM_001099239	911	931
NM_200067	111	131
NM_131596	1431	1461
NM_001003547	5811	5831
NM_001002551	1131	1141
NM_212832	851	861
NM_001163779	1421	1431
NM_213536	311	321
NM_213128	1281	1301
NM_001170819	2061	2081
NM_200571	671	681
NM_199585	831	841
NM_001017604	2211	2221
NM_001114739	1071	1081
NM_214812	1231	1241
NM_001045564	631	651
NM_001139438	341	361
NM_173238	1791	1811
NM_199749	331	351
NM_213355	2091	2101
NM_001007309	441	451
NM_001326384	2301	2311
NM_001128751	1691	1701
NM_001030106	931	941
NM_001102672	3811	3841
NM_200261	1871	1891
NM_001020602	1361	1371
NM_001243164	1101	1111
NM_001099246	3561	3571
NM_001161375	1201	1221
NM_213228	961	981
NM_205560	331	361
NM_001328014	1351	1361
NM_001077806	2251	2281
NM_203460	1421	1431
NM_001013542	1021	1041
NM_199868	4001	4021
NM_200685	1831	1881
NM_001309889	7671	7701
NM_213463	181	191
NM_001326391	1801	1821
NM_200380	871	891
NM_178304	1901	1911
NM_001004600	1201	1211
NM_199666	1601	1611
NM_001089543	7091	7111
NM_001045145	1671	1701
NM_213450	2311	2321
NM_001123012	4101	4131
NM_214814	3811	3821
NM_001013490	191	201
NM_001017651	621	641
NM_001098487	1121	1131
NM_001081692	4611	4631
NM_131427	961	971
NM_199547	391	411
NM_199562	341	361
NM_001122700	2581	2601
NM_001007367	661	671
NM_201044	621	631
NM_201454	1721	1751
NM_199584	3071	3091
NM_205556	611	621
NM_200637	2551	2561
NM_212933	541	561
NM_001002684	121	131
NM_001083836	1581	1591
NM_001007313	3231	3241
NM_001110472	1481	1511
NM_200280	611	621
NM_001044310	2621	2631
NM_001326707	1241	1261
NM_201584	221	231
NM_213104	2211	2221
NM_001079948	281	301
NM_001002013	941	971
NM_213257	2551	2601
NM_001037413	1221	1231
NM_001328193	271	281
NM_001327898	1141	1161
NM_199974	31	81
NM_201125	41	61
NM_001020680	361	381
NM_213111	1031	1041
NM_199536	821	861
NM_131775	921	951
NM_199428	841	851
NM_001045056	741	781
NM_001170739	6831	6851
NM_212832	91	101
NM_001326493	1521	1551
NM_001007175	1171	1181
NM_201153	501	521
NM_001017864	461	481
NM_001326426	1031	1091
NM_199577	961	971
NM_001080190	2361	2371
NM_001001832	1331	1351
NM_213051	2391	2401
NM_001007455	1131	1151
NM_200528	1731	1751
NM_001278600	1351	1371
NM_001164029	101	111
NM_001004001	1541	1571
NM_001045098	1571	1601
NM_205607	1851	1861
NM_001003509	621	641
NM_199898	2041	2051
NM_200147	1291	1321
NM_001202480	321	341
NM_213379	1651	1691
NM_001328036	2351	2371
NM_001159912	1781	1791
NM_001003539	591	611
NM_001310015	1881	1911
NM_199935	1241	1251
NM_001044793	1771	1791
NM_001076556	1351	1361
NM_001291707	4101	4131
NM_198805	3621	3631
NM_213313	1171	1201
NM_001100015	871	891
NM_001020476	4831	4851
NM_001077313	2131	2141
NM_199617	1221	1231
NM_200502	111	131
NM_001123057	811	821
NM_001044312	1531	1541
NM_001326521	91	111
NM_205567	991	1031
NM_001199725	1901	1941
NM_001002013	3191	3211
NM_200369	1321	1341
NM_213214	351	361
NM_213465	3131	3151
NM_214770	1211	1251
NM_001111176	281	291
NM_200446	1711	1751
NM_198806	2361	2381
NM_214683	901	931
NM_199756	111	161
NM_001172556	151	171
NM_199631	631	641
NM_001081629	411	431
NM_212803	1161	1171
NM_199213	3931	3981
NM_001012487	1221	1231
NM_001045056	1391	1421
NM_213077	3131	3141
NM_199963	1181	1211
NM_001313759	1821	1841
NM_001122773	3481	3491
NM_001017766	931	941
NM_001002374	801	811
NM_001347607	3401	3421
NM_213434	3531	3541
NM_001030161	271	291
NM_001020587	771	781
NM_001001729	2251	2261
NM_001100138	2241	2271
NM_001030161	4331	4341
NM_001002592	771	781
NM_199846	1321	1331
NM_001098485	3141	3151
NM_001042769	1021	1041
NM_152963	761	771
NM_001102629	1441	1451
NM_200981	1251	1271
NM_213438	2521	2531
NM_201002	31	41
NM_001113609	91	101
NM_001003523	511	541
NM_001099996	1031	1051
NM_001077600	2421	2451
NM_201480	241	251
NM_001123252	1101	1181
NM_001109863	661	671
NM_213282	81	91
NM_207057	691	701
NM_001326382	1041	1051
NM_200884	541	561
NM_001030247	1461	1471
NM_001007344	741	801
NM_001077613	961	971
NM_001077341	2611	2621
NM_173246	781	821
NM_001080669	2281	2291
NM_001004577	401	421
NM_001044793	2661	2671
NM_200081	4201	4241
NM_001077379	2571	2591
NM_200236	2511	2521
NM_200068	901	911
NM_001013488	561	571
NM_001199872	1841	1861
NM_001114847	2001	2011
NM_001013326	1081	1111
NM_001347672	3811	3841
NM_001347607	3231	3261
NM_131886	1691	1701
NM_001045219	2091	2111
NM_213110	1141	1151
NM_201993	351	381
NM_199272	541	561
NM_001326532	831	851
NM_214766	71	81
NM_001039461	4801	4831
NM_001002374	1181	1191
NM_198908	461	471
NM_213338	791	821
NM_001142563	1861	1871
NM_001171068	271	291
NM_213528	2791	2811
NM_214698	1631	1661
NM_001200039	41	61
NM_001123320	641	661
NM_001025537	1511	1541
NM_001024098	2091	2131
NM_200918	1611	1631
NM_200866	131	151
NM_200661	871	891
NM_200930	571	581
NM_001077274	1151	1181
NM_001326382	531	541
NM_213442	1121	1141
NM_201448	221	241
NM_001002613	1451	1471
NM_213186	1931	1941
NM_214695	811	821
NM_001277234	41	61
NM_001007771	1421	1441
NM_001020815	881	901
NM_200250	241	281
NM_001045144	2711	2721
NM_001089466	1201	1231
NM_201457	891	921
NM_001193540	2111	2121
NM_001030257	1401	1441
NM_001002865	791	801
NM_199613	1951	1981
NM_001326382	2501	2511
NM_001002162	1541	1561
NM_001003560	61	111
NM_201075	321	351
NM_001080002	151	181
NM_001083086	381	421
NM_201099	71	81
NM_213216	171	201
NM_131790	171	181
NM_001031669	991	1021
NM_001029962	2021	2031
NM_001077541	2501	2511
NM_001024419	1001	1011
NM_213131	1141	1151
NM_001002300	661	671
NM_001025475	2011	2021
NM_001123299	611	621
NM_001077393	1891	1921
NM_201449	1911	1921
NM_001123236	1791	1811
NM_001030227	1141	1151
NM_001002873	2701	2751
NM_001328129	1421	1431
NM_001347691	1561	1581
NM_001089524	2111	2131
NM_001114898	1231	1241
NM_001007136	1401	1421
NM_001202493	8061	8071
NM_001160159	2141	2181
NM_199687	591	621
NM_200152	1981	2021
NM_200982	271	291
NM_199862	1241	1271
NM_001127307	3431	3441
NM_198072	2181	2201
NM_001353933	1261	1271
NM_200917	211	241
NM_001110105	771	781
NM_213378	1811	1841
NM_001327754	691	701
NM_199935	341	361
NM_001113629	3521	3531
NM_181330	391	421
NM_213197	361	381
NM_001114681	4671	4681
NM_200473	3391	3411
NM_001077160	841	871
NM_213231	701	721
NM_001193543	4371	4381
NM_001082838	3441	3451
NM_130931	641	671
NM_001083837	51	81
NM_001044852	3411	3421
NM_201297	1291	1311
NM_200467	1211	1241
NM_001020601	1381	1431
NM_001002665	2311	2321
NM_001080609	521	531
NM_200545	811	831
NM_001030067	1341	1371
NM_001328413	511	531
NM_001045163	821	841
NM_001114410	1411	1421
NM_001007775	211	221
NM_199900	6241	6261
NM_001104944	711	721
NM_201301	1531	1561
NM_001003640	1631	1691
NM_001020737	601	611
NM_201474	181	191
NM_131189	1871	1881
NM_001080628	281	301
NM_213111	1061	1071
NM_001020684	1011	1031
NM_200321	2941	2961
NM_001005604	1181	1211
NM_131224	721	731
NM_200923	1111	1141
NM_001199436	1981	1991
NM_199479	1651	1661
NM_001346284	1161	1181
NM_199703	4251	4261
NM_001204132	1891	1901
NM_001002333	81	101
NM_201450	3321	3341
NM_001030074	4321	4331
NM_001328408	441	461
NM_001007771	891	901
NM_173255	521	541
NM_001006062	1221	1241
NM_200128	1641	1661
NM_001076667	771	791
NM_001002322	1491	1501
NM_001127256	581	591
NM_199627	771	781
NM_001199680	171	181
NM_001328189	5651	5661
NM_001326392	3391	3401
NM_001002708	391	411
NM_001044907	801	891
NM_199794	541	551
NM_001044946	1971	1981
NM_001004583	1601	1611
NM_212703	1431	1461
NM_001002720	1741	1751
NM_200394	161	191
NM_001045076	151	221
NM_001089355	1121	1141
NM_213052	1221	1241
NM_199764	1161	1191
NM_200055	3011	3031
NM_001008649	161	181
NM_200764	251	261
NM_001281468	7271	7291
NM_001110412	701	711
NM_001136185	541	571
NM_201181	1511	1521
NM_001114421	2731	2771
NM_001076745	861	871
NM_001077141	1381	1401
NM_205735	1131	1151
NM_001045182	451	461
NM_001171585	3051	3061
NM_201217	1721	1731
NM_199796	911	951
NM_001004636	41	81
NM_001080647	841	871
NM_214766	381	401
NM_001025528	1601	1621
NM_001089338	491	501
NM_201194	441	461
NM_001002374	1551	1571
NM_212621	811	831
NM_198807	721	761
NM_214782	1401	1421
NM_001076745	2011	2021
NM_001003614	1361	1371
NM_001110480	1761	1771
NM_212982	1861	1881
NM_001309889	2791	2811
NM_001162486	5651	5671
NM_001007333	911	921
NM_207049	1121	1141
NM_001310037	1181	1191
NM_200174	61	91
NM_001002336	1411	1431
NM_001015059	1291	1311
NM_213185	1201	1211
NM_001329981	5461	5471
NM_199555	1161	1181
NM_001312897	2501	2521
NM_001139438	831	851
NM_001004583	2021	2031
NM_001020772	561	571
NM_001128236	3801	3811
NM_001045289	451	461
NM_001018083	181	231
NM_213140	551	561
NM_001114580	1091	1101
NM_131877	491	511
NM_001290015	2151	2171
NM_001145601	1061	1071
NM_001017620	141	161
NM_001327786	4221	4241
NM_001270973	1931	1951
NM_001301331	1671	1681
NM_001020568	2661	2681
NM_213515	241	251
NM_200073	2371	2381
NM_200666	1421	1431
NM_200317	321	341
NM_001326427	901	931
NM_001003466	1041	1051
NM_001020542	1861	1871
NM_212703	1671	1721
NM_213125	871	891
NM_001044786	1361	1371
NM_001002041	1381	1401
NM_001099264	761	781
NM_001030129	1111	1121
NM_212609	2551	2571
NM_199811	171	181
NM_201301	571	591
NM_201331	231	251
NM_001199375	2001	2021
NM_001136488	91	101
NM_131679	161	181
NM_001083826	2421	2431
NM_001025174	2331	2341
NM_200378	271	281
NM_201304	1841	1851
NM_001200060	1741	1751
NM_001316693	1121	1151
NM_001017677	1211	1231
NM_199529	21	41
NR_137174	2901	2921
NM_001326577	1351	1371
NM_001104940	3501	3521
NM_200182	1121	1141
NM_001033745	1571	1591
NM_212691	381	391
NM_001014350	161	201
NM_001003763	551	561
NM_212724	1011	1021
NM_001030259	2101	2111
NM_001077756	1391	1401
NM_001033111	741	771
NM_001033721	2271	2291
NM_001123229	3371	3391
NM_201143	1031	1041
NM_001105694	1311	1331
NM_001076589	1231	1241
NM_201456	2071	2081
NM_001083563	1351	1361
NM_200981	1591	1631
NM_131578	1791	1801
NM_001161447	3981	3991
NM_001328344	411	431
NM_001242995	671	691
NM_001076748	1291	1311
NM_001024419	1431	1441
NM_001005938	311	341
NM_205673	301	311
NM_205716	1111	1121
NM_001005939	681	691
NM_001003769	681	701
NM_001007327	1831	1841
NM_001089344	1861	1871
NM_213021	481	491
NM_199985	391	411
NM_001326456	1681	1701
NM_001099227	1111	1131
NM_001328401	5811	5831
NM_201075	1931	1951
NM_001128671	311	321
NM_199822	2011	2031
NM_001089368	3021	3041
NM_001082994	1091	1121
NM_001030065	1641	1651
NM_001089351	171	191
NM_001077296	1061	1111
NM_001020680	331	351
NM_212740	101	111
NM_001098481	111	141
NM_131524	451	461
NM_212657	721	731
NM_194398	111	121
NM_001002157	671	681
NM_001328163	231	251
NM_001080054	2051	2071
NM_001128699	1101	1141
NM_001077313	2231	2241
NM_201273	851	871
NM_001017565	851	861
NM_001328537	81	91
NM_214815	1821	1831
NM_201466	1361	1371
NM_200130	561	571
NM_200411	2491	2501
NM_213368	941	981
NM_001006081	651	661
NM_001164394	7761	7781
NM_001113618	701	711
NM_001001402	2321	2351
NM_001243875	2041	2061
NM_001014370	711	731
NM_001123252	1511	1521
NM_001102676	4441	4451
NM_001030227	1571	1581
NM_212699	541	571
NM_131621	4111	4121
NM_001045069	1401	1421
NM_001002655	2091	2101
NM_001005945	931	951
NM_001143840	6921	6931
NM_199862	1151	1171
NM_001123373	5821	5841
NM_200076	2211	2221
NM_199952	1211	1221
NM_001083554	2711	2751
NM_001080169	2251	2271
NM_001114908	931	951
NM_001017883	101	131
NM_001044708	491	521
NM_001083061	1221	1241
NM_001110022	1381	1391
NM_201288	4001	4021
NM_001017844	881	891
NM_001006076	661	671
NM_001045028	3051	3071
NM_001113798	611	631
NM_001077781	2121	2141
NM_200388	911	931
NM_212707	371	391
NM_001077332	511	541
NM_199549	1851	1871
NM_214755	771	791
NM_001003484	241	261
NM_001089384	2321	2331
NM_200685	881	901
NM_001111247	341	351
NM_001076671	1491	1511
[truncated: 112,708 more rows]

## Sheet: specific_dsr_way1
TransID	start(0-based)	end(0-based)
NM_131510	711	721
NM_200492	1091	1101
NM_001006056	741	751
NM_001114916	551	561
NM_214756	2461	2471
NM_001256631	2081	2121
NM_001002351	1461	1471
NM_213471	2691	2701
NM_001002572	961	971
NM_001007441	2141	2151
NM_001017994	1441	1451
NM_200619	1901	1911
NM_200759	881	891
NM_001024461	1761	1771
NM_001347671	3851	3861
NM_001008649	601	631
NM_001130611	971	981
NM_199840	211	231
NM_131386	1561	1571
NM_001083849	1871	1881
NM_001128330	1901	1911
NM_001115057	451	461
NM_001002541	591	611
NM_001002630	491	511
NM_001113625	2731	2741
NM_001122784	591	621
NM_001006069	611	621
NM_001007392	261	271
NM_001122784	231	241
NM_205686	1161	1171
NM_001013541	551	561
NM_213424	1991	2001
NM_001114683	1481	1501
NM_194417	1411	1421
NM_001003780	741	751
NM_214756	371	381
NM_001193543	4271	4281
NM_001310015	3951	3961
NM_001077449	2851	2861
NM_001030167	2491	2501
NM_001002541	1971	1981
NM_001130601	3341	3351
NM_001100012	891	901
NM_201288	2891	2931
NM_001351801	511	521
NM_001007346	901	911
NM_001079955	931	941
NM_173284	431	491
NM_001045083	2211	2231
NM_001077462	841	871
NM_001082993	3251	3261
NM_001079998	1111	1121
NM_200330	2981	2991
NM_001045149	261	271
NM_201506	1081	1091
NM_001033718	431	451
NM_200685	1891	1901
NM_001320203	1071	1081
NM_198140	921	931
NM_001115144	511	521
NM_131572	251	261
NM_001256656	1921	1931
NM_200949	341	351
NM_001030086	821	831
NM_001123389	3391	3401
NM_001003883	1261	1281
NM_001159971	2211	2221
NM_212676	451	461
NM_200027	391	401
NM_001170739	7981	7991
NM_001002567	511	521
NM_001347570	2761	2771
NM_001122786	2381	2391
NM_212702	1211	1221
NM_001110286	411	421
NM_001127307	1881	1891
NM_001289858	1521	1531
NM_200938	991	1001
NM_200313	71	81
NM_001007298	3201	3211
NM_212614	2021	2031
NM_001128537	2161	2171
NM_001310037	581	591
NM_214709	201	211
NM_001328558	1801	1811
NM_200668	711	721
NM_001014304	1931	1941
NM_001002730	591	601
NM_001017844	481	511
NM_001037402	851	861
NM_001014334	1531	1541
NM_131240	1321	1331
NM_001256603	271	281
NM_001013288	721	741
NM_001004601	131	141
NM_001077288	1591	1601
NM_001353855	2611	2621
NM_001007458	2521	2531
NM_001025513	491	501
NM_001005391	4041	4061
NM_001003547	3791	3801
NM_001044867	871	881
NM_212963	3581	3591
NM_001017557	1121	1131
NM_001003747	761	771
NM_001089478	121	141
NM_199795	291	301
NM_001077313	2291	2301
NM_001109720	751	761
NM_001030228	1701	1711
NM_001030145	851	861
NM_001020714	1351	1361
NM_001167956	1011	1021
NM_001014819	2261	2271
NM_001003571	531	541
NM_001002504	6831	6841
NM_201135	1031	1041
NM_001030184	211	221
NM_001201463	631	641
NM_200571	701	711
NM_203321	1891	1911
NM_001004557	1211	1221
NM_213641	1401	1411
NM_001327986	581	591
NM_001171585	2891	2901
NM_001281986	681	691
NM_001040335	641	651
NM_001024442	381	391
NM_001100006	1921	1931
NM_212732	431	441
NM_001164028	1381	1391
NM_001123255	1691	1701
NM_001020630	841	851
NM_001324455	1271	1281
NM_001008575	3081	3091
NM_213383	371	381
NM_001005770	1151	1161
NM_001271624	821	831
NM_213411	1961	1971
NM_001118893	9341	9351
NM_200594	1141	1151
NM_199805	261	271
NM_001030213	861	871
NM_001089368	2321	2351
NM_001005391	4431	4441
NM_214716	711	721
NM_001256623	3001	3011
NM_001002221	641	661
NM_200517	981	991
NM_001193674	671	681
NM_001037568	1431	1441
NM_001002375	891	901
NM_213524	1341	1351
NM_199686	1091	1101
NM_001328036	6591	6601
NM_001308825	2691	2701
NM_001077449	161	171
NM_200383	471	481
NM_001013462	611	621
NM_152941	2401	2411
NM_001006069	161	171
NM_213531	3231	3251
NM_001328429	3471	3491
NM_001014815	1031	1041
NM_001100045	551	561
NM_001020549	2541	2551
NM_200571	3021	3031
NM_001162486	2501	2521
NM_001313694	1551	1571
NM_001291329	661	671
NM_001309209	191	201
NM_212707	1041	1051
NM_001030276	1721	1731
NM_001002504	3161	3171
NM_001309792	1161	1171
NM_001080807	3601	3611
NM_212702	381	391
NM_212940	1641	1651
NM_001075103	1281	1291
NM_001242974	331	341
NM_001044921	511	521
NM_001039513	871	881
NM_207069	1991	2001
NM_001142592	3491	3501
NM_214708	2111	2121
NM_001002640	841	851
NM_001089323	1381	1391
NM_001005921	2271	2291
NM_001080672	1641	1651
NM_212683	1151	1161
NM_001007199	1631	1641
NM_001001403	3021	3031
NM_200582	771	781
NM_199747	1491	1501
NM_001082808	2951	2961
NM_001002228	3381	3391
NM_001077318	2761	2771
NM_001044970	2041	2061
NM_201450	1531	1541
NM_201155	1111	1121
NM_200685	4981	4991
NM_199981	471	491
NM_201100	1461	1471
NM_001005395	4261	4271
NM_001199990	3011	3021
NM_001083086	1901	1911
NM_214768	2871	2881
NM_001044310	3421	3431
NM_001030063	231	241
NM_213221	951	961
NM_001030174	241	251
NM_199836	521	531
NM_001113646	771	781
NM_201326	1991	2011
NM_199977	1071	1081
NM_201450	291	301
NM_199799	691	701
NM_001256656	2481	2491
NM_200649	2981	2991
NM_001005996	1151	1171
NM_213425	1501	1511
NM_001077270	2061	2081
NM_131788	1271	1281
NM_213435	1591	1601
NM_213420	1091	1101
NM_001045293	361	391
NM_001081692	3991	4001
NM_001080560	581	591
NM_001077327	1351	1361
NM_001005935	541	551
NM_194396	721	731
NM_001114894	961	981
NM_001045064	1281	1291
NM_213109	501	541
NM_001326696	811	831
NM_001002448	431	441
NM_194366	121	131
NM_131398	1091	1101
NM_001024440	851	861
NM_001328215	431	441
NM_001115123	5911	5931
NM_001012304	1081	1091
NM_200478	3611	3621
NM_203461	1131	1151
NM_001100001	4481	4491
NM_001029961	881	901
NM_001083826	961	971
NM_199623	2291	2321
NM_001080751	551	571
NM_001044818	591	601
NM_001029960	601	611
NM_001256634	3421	3441
NM_205714	971	991
NM_001002673	491	501
NM_001202512	2341	2351
NM_001122704	391	411
NM_001014292	1541	1551
NM_199550	1511	1521
NM_199655	2461	2471
NM_213295	1431	1441
NM_200388	641	651
NM_153668	201	211
NM_001039461	5051	5061
NM_001327999	1391	1401
NM_214704	1471	1481
NM_001328408	1331	1341
NM_001003435	641	651
NM_001310015	4621	4631
NM_207054	1511	1521
NM_001077167	1141	1151
NM_001328161	3231	3241
NM_001202416	771	781
NM_001080200	911	921
NM_213360	1491	1511
NM_199820	271	281
NM_001328210	1811	1821
NM_199754	2051	2061
NM_001014299	601	621
NM_001320439	411	421
NM_200088	461	471
NM_001014332	2151	2161
NM_001326481	2011	2021
NM_001017584	881	891
NM_213087	111	131
NM_200405	1681	1691
NM_131791	1611	1621
NM_001197328	1161	1171
NM_001003883	301	311
NM_200931	1431	1441
NM_001045444	3291	3301
NM_001004606	1111	1131
NM_001002147	721	731
NM_001002225	1821	1831
NM_001114928	451	461
NM_001003738	161	171
NM_001006051	501	511
NM_001199912	41	51
NM_001326544	3761	3771
NM_199978	2401	2411
NM_213183	1091	1101
NM_001005587	1711	1731
NM_001017819	691	701
NM_001130657	1461	1471
NM_001246284	5701	5711
NM_001045456	481	491
NM_001008589	2391	2441
NM_001002464	171	181
NM_001045419	1151	1161
NM_001167956	841	851
NM_001098737	371	381
NM_213358	291	301
NM_001033592	1971	1981
NM_001111216	1441	1451
NM_201166	1141	1151
NM_130981	1951	1961
NM_001020696	1481	1491
NM_201189	411	431
NM_001168263	181	191
NM_001243172	361	371
NR_132112	721	731
NM_001113614	671	681
NM_001316934	681	691
NM_001351640	2781	2791
NM_201295	1891	1901
NM_001005932	2061	2071
NM_173244	4681	4691
NM_001099989	6811	6821
NM_001008617	251	271
NM_200555	591	601
NM_212642	771	781
NM_001030074	1871	1881
NM_214682	2271	2281
NM_001013542	2521	2541
NM_200116	2111	2121
NM_001310015	2071	2081
NM_213485	641	651
NM_001114314	2401	2411
NM_201143	1971	1981
NM_001199724	2171	2191
NM_200790	271	281
NM_212631	341	351
NM_212589	681	691
NM_001013521	461	471
NM_001020602	461	481
NM_200355	981	991
NM_001111281	3801	3811
NM_001002428	611	621
NM_001017777	1111	1121
NM_001002316	831	841
NM_001326598	2751	2761
NM_199753	1561	1581
NM_001145694	971	991
NM_001077159	2711	2721
NM_001080563	1391	1401
NM_001347691	2581	2591
NM_001105134	21	31
NM_199882	591	601
NM_001030148	2621	2631
NM_173277	5821	5831
NM_001017642	1351	1361
NM_001014358	981	991
NM_205735	3161	3171
NM_001308967	701	711
NM_212776	1321	1341
NM_001003491	831	841
NM_213424	871	881
NM_001328036	4281	4301
NM_001076620	181	191
NM_001003836	1351	1361
NM_214707	1371	1381
NM_001118893	8311	8321
NM_001201559	1331	1341
NM_213227	231	241
NM_001123255	1071	1081
NM_001002298	2991	3001
NM_001346251	841	851
NM_001030206	1391	1411
NM_001327862	2131	2151
NM_001170835	3431	3441
NM_001082921	121	141
NM_200759	921	931
NM_200543	1051	1061
NM_001017608	161	181
NM_001080199	3431	3441
NM_212631	2421	2431
NM_214697	931	941
NM_001291329	1681	1691
NM_199875	811	821
NM_001113618	1471	1481
NM_001327871	1571	1581
NM_214722	121	131
NM_001122745	971	981
NM_199659	171	181
NM_213365	271	281
NM_213133	541	561
NM_205601	2331	2341
NM_001003522	731	751
NM_212638	821	831
NM_001017572	271	281
NM_001042748	421	471
NM_001003752	981	991
NM_001123048	2451	2461
NM_001002385	1661	1671
NM_001042687	951	961
NM_001013488	111	121
NM_001308548	2721	2731
NM_001089339	1781	1801
NM_001100138	1031	1041
NM_001301331	2211	2221
NM_001114410	2131	2141
NM_001007298	4001	4011
NM_001109740	201	211
NM_213414	1611	1631
NM_200306	821	841
NM_200383	1231	1241
NM_200644	461	481
NM_001033752	2391	2401
NM_001017830	321	331
NM_173250	711	721
NM_152979	1641	1651
NM_001328588	1231	1241
NM_001013482	1091	1101
NM_212667	351	361
NM_001302222	1001	1011
NM_001328203	3571	3581
NM_001113796	1991	2011
NM_001079946	81	91
NM_001003762	591	601
NM_001002868	1911	1921
NM_131112	1881	1901
NM_200304	321	331
NM_001037389	201	211
NM_001100006	1151	1161
NM_198365	101	111
NM_200926	2401	2411
NM_213449	1591	1611
NM_201214	151	161
NM_207054	301	311
NM_200164	3791	3821
NM_201346	1151	1161
NM_001007053	941	951
NM_001044785	3301	3311
NM_001044858	4151	4161
NM_001098756	601	611
NM_001326426	511	521
NM_131791	3371	3391
NM_199673	1401	1411
NM_001103138	451	461
NM_001173504	1391	1401
NM_001089380	2151	2161
NM_213465	1351	1361
NM_001018126	61	71
NM_001002412	551	561
NM_213120	1511	1521
NM_173257	2231	2241
NM_001123288	681	691
NM_213478	1151	1161
NM_201169	571	581
NM_001123049	971	981
NM_173261	2381	2391
NR_132112	341	351
NM_001110394	5911	5921
NM_001003850	201	211
NM_212664	1381	1391
NM_001326690	211	221
NM_001002322	2241	2251
NM_001003763	1161	1171
NM_001089326	1951	1961
NM_001014345	2231	2241
NM_001159988	271	281
NM_213066	151	161
NM_212698	111	121
NM_001002611	541	551
NM_001346283	4551	4571
NM_200640	551	561
NM_001013529	1191	1211
NM_207088	871	881
NM_001123249	611	621
NM_001003525	361	381
NM_213378	971	981
NM_001002869	2271	2281
NM_001077329	2601	2631
NM_001110401	1011	1021
NM_197934	1921	1941
NM_001076727	1931	1941
NM_205561	1021	1031
NM_200402	131	141
NM_001130661	2521	2531
NM_001004594	1641	1651
NM_001044753	1811	1821
NM_213189	1531	1541
NM_001044809	3161	3171
NM_199585	1711	1721
NM_001328353	2451	2471
NM_200116	1871	1881
NM_001077756	461	471
NM_001037101	241	251
NM_001044833	1191	1211
NM_194374	2971	2981
NM_001003887	1611	1621
NM_212787	421	431
NM_001082994	1301	1311
NM_203460	851	861
NM_001099976	951	961
NM_001098745	1351	1361
NM_201033	3411	3421
NM_001012368	3311	3321
NM_001162486	5161	5171
NM_001007346	731	741
NM_213487	161	171
NM_001034982	271	281
NM_001326696	791	801
NM_200151	1131	1151
NM_001122708	1491	1501
NM_001080008	1241	1251
NM_001080603	3271	3281
NM_001002596	911	921
NM_001309416	2071	2081
NR_138543	511	521
NM_001030145	41	51
NM_212922	381	391
NM_200100	1141	1161
NM_131796	3391	3401
NM_213354	1451	1471
NM_001114440	3031	3041
NM_001080563	2701	2711
NM_200838	1571	1581
NM_001002179	2181	2191
NM_001002082	621	641
NM_001347691	3071	3081
NM_001079998	421	431
NM_201132	2311	2321
NM_001025478	1181	1191
NM_001159914	1821	1831
NM_001200010	471	481
NM_001214910	3331	3341
NM_001001943	3671	3701
NM_001002113	251	261
NM_131673	1691	1701
NM_001045276	861	871
NM_200150	1061	1081
NM_001143840	4681	4691
NM_001202512	251	261
NM_200254	171	181
NM_001114886	1051	1061
NM_201169	1171	1181
NM_001001886	171	181
NM_001044786	71	81
NM_001326598	1631	1661
NM_001312886	2061	2071
NM_131316	701	711
NM_001076710	2041	2051
NM_001277598	2661	2671
NM_213495	2061	2081
NM_213127	991	1001
NM_213510	1971	1981
NM_200380	791	801
NM_199891	1101	1111
NM_001313736	5681	5691
NM_001118896	1231	1241
NM_213059	911	921
NM_213514	501	511
NM_001045069	1231	1241
NM_001002366	771	781
NM_001045419	1951	1961
NM_131673	761	771
NM_001082481	2731	2741
NM_213722	241	251
NM_001004626	31	71
NM_001029970	1171	1191
NM_001327755	1851	1871
NM_212633	971	981
NM_001006081	301	311
NM_001199726	1071	1081
NM_001005921	671	721
NM_201582	2491	2501
NM_131715	1891	1901
NM_201580	181	191
NM_214737	331	341
NM_212588	1451	1461
NM_001013331	3441	3461
NM_199679	551	561
NM_199704	731	741
NM_001033752	301	311
NM_001099227	571	581
NM_001001951	1341	1351
NM_200889	831	851
NM_001030276	3571	3581
NM_001145584	14131	14141
NM_001003882	291	321
NM_001007135	1991	2011
NM_001013331	1091	1101
NM_200109	1801	1811
NM_212672	1671	1681
NM_213048	1631	1641
NM_001326391	1921	1931
NM_001001836	1291	1301
NM_001291325	1911	1941
NM_001166255	1881	1891
NM_213330	2021	2041
NM_001002073	951	961
NM_001002148	881	891
NM_001045083	3151	3161
NM_203321	1771	1781
NM_001007433	331	341
NM_001145621	281	291
NM_207090	871	881
NM_001083851	2441	2451
NM_001109727	1451	1461
NM_214730	961	971
NM_213532	141	151
NM_200030	51	61
NM_131386	261	281
NM_131200	3171	3181
NM_001328209	1041	1051
NM_001079836	1541	1551
NM_170761	1971	1981
NM_131055	451	461
NM_001113616	1531	1541
NM_201144	1991	2001
NM_213482	2591	2601
NM_200444	2211	2221
NM_001111157	1851	1861
NM_001013477	621	631
NM_001320102	1571	1581
NM_001020629	371	391
NM_213479	591	601
NM_131507	1351	1361
NM_200466	1301	1311
NM_200685	601	611
NM_001020696	351	361
NM_001326388	3811	3821
NM_001082872	791	801
NM_001044779	161	171
NM_200583	1771	1781
NM_001045126	1421	1431
NM_212621	1211	1221
NM_001030276	1351	1361
NM_198366	941	951
NM_201336	2131	2141
NM_001006018	651	661
NM_201136	551	561
NM_001305556	481	491
NM_001033107	1171	1181
NM_001328209	531	541
NM_001075112	721	731
NM_201479	1061	1071
NM_212766	1261	1271
NM_001353933	111	121
NM_001329981	3091	3101
NM_200965	901	911
NM_001202477	921	931
NM_001044847	821	831
NM_001159823	981	991
NM_001020617	1271	1301
NM_212582	3621	3631
NM_001328553	2071	2081
NM_001024426	611	621
NM_200676	451	461
NM_213059	101	111
NM_001039461	5411	5431
NM_001077553	261	271
NM_001256634	3201	3211
NM_201088	871	881
NM_198911	831	841
NM_200117	631	641
NM_200703	761	771
NM_001025517	2451	2461
NM_205571	481	491
NM_001013349	861	871
NM_001013306	441	471
NM_001017360	341	361
NM_200727	731	741
NM_001102570	2681	2691
NM_001130818	2051	2061
NM_212766	1831	1841
NM_001076575	1961	1971
NM_001029962	1191	1201
NM_001002047	211	231
NM_001025516	301	311
NM_198145	841	851
NM_001256205	1141	1151
NM_001291355	1501	1511
NM_200531	1041	1051
NM_001037432	1401	1411
NM_199788	711	721
NM_001098747	291	301
NM_131508	541	551
NM_001003522	1841	1851
NM_001114739	1161	1181
NM_001326556	221	261
NM_001079948	1461	1471
NM_001024374	1151	1161
NM_201325	1721	1731
NM_201469	701	711
NM_001077386	861	871
NM_001020627	2011	2021
NM_001098745	1741	1751
NM_001105112	1131	1141
NM_212633	311	321
NM_200200	471	481
NM_001114575	1291	1301
NM_001013569	1091	1101
NM_199672	1281	1291
NM_001166255	681	691
NM_001077325	521	531
NM_001003522	3871	3881
NM_001351640	1891	1901
NM_201142	2421	2431
NM_001083554	2011	2021
NM_001277109	3591	3601
NM_001327799	981	1001
NM_001244778	861	871
NM_001034974	411	421
NM_001079995	611	621
NM_001044312	4591	4601
NM_001017669	1291	1311
NM_001004117	1201	1221
NM_200441	3141	3151
NM_201058	621	651
NM_001089466	611	631
NM_001044867	251	261
NM_001045060	1081	1091
NM_001244778	1491	1501
NM_001020758	741	751
NM_001199998	861	871
NM_001017837	121	131
NM_001102570	511	521
NM_213352	931	941
NM_001326382	1781	1791
NM_198810	1521	1531
NM_001145601	851	861
NM_001080017	591	601
NM_200926	1051	1061
NM_001100401	851	861
NM_001309435	2861	2871
NM_001312680	3241	3251
NM_214818	1931	1951
NM_213446	661	671
NM_199675	1561	1571
NM_001290093	131	141
NM_001033741	511	521
NM_001080188	4011	4021
NM_200234	1191	1201
NM_213502	1351	1361
NM_001003560	321	331
NM_001327797	3831	3841
NM_001045164	2191	2231
NM_201009	691	701
NM_001044852	81	91
NM_001013538	1431	1441
NM_001005590	1231	1241
NM_001002087	531	541
NM_001128353	2131	2141
NM_205585	1081	1111
NM_001326399	151	161
NM_001320330	1531	1541
NM_001281788	391	401
NM_001130611	761	771
NM_001014303	1781	1791
NM_001030074	141	161
NM_001079967	4671	4681
NM_001128699	1501	1511
NM_001256215	1001	1011
NM_199790	181	191
NM_001008732	201	211
NM_199815	3261	3271
NM_001130767	2211	2221
NM_001089341	1621	1631
NM_001080052	1811	1821
NM_001083554	1431	1441
NM_001308548	3011	3021
NM_001310042	1081	1091
NM_001017729	701	711
NM_001004645	331	341
NM_001122786	641	651
NM_131398	1311	1331
NM_001044821	1511	1521
NM_001002180	2401	2411
NM_001030179	1031	1041
NM_173237	1561	1571
NM_001002655	1291	1301
NM_001002120	1701	1711
NM_200256	3231	3241
NM_001327992	1211	1221
NM_199538	1141	1151
NM_001126390	1031	1041
NM_199796	1181	1191
NM_131573	91	101
NM_001288652	741	751
NM_199846	921	931
NM_001161600	5001	5031
NM_199662	71	81
NM_200958	881	891
NM_001079971	1201	1211
NM_001031668	61	71
NM_001162484	1241	1251
NM_199907	421	431
NM_001004533	1611	1621
NM_181559	1721	1741
NM_214814	4501	4511
NM_001199871	1461	1471
NM_001001941	3001	3011
NM_212627	541	551
NM_001328215	3941	3951
NM_001039971	1341	1351
NM_200405	201	211
NM_001308605	1901	1931
NM_199769	1921	1931
NM_001077153	2681	2691
NM_001039461	6161	6171
NM_001077567	421	431
NM_001353933	1391	1401
NM_001110022	1861	1871
NM_001014324	2331	2341
NM_001005949	341	351
NM_001029949	1931	1941
NM_200100	741	751
NM_200653	4721	4731
NM_200931	1451	1461
NM_001256215	621	631
NM_001080041	891	901
NM_001014323	1161	1171
NM_001014344	301	311
NM_213518	1861	1871
NM_199792	1481	1491
NM_001100093	411	421
NM_213196	971	981
NM_001089367	301	311
NM_200661	281	301
NM_001002500	321	331
NM_001111150	1811	1821
NM_214718	781	791
NM_001034978	1481	1491
NM_001105141	5991	6001
NM_201157	2071	2081
NM_001045237	941	951
NM_200241	2281	2291
NM_194421	2091	2111
NM_131503	2701	2711
NM_212963	2101	2111
NM_001291706	1091	1101
NM_001161511	1371	1411
NM_001328014	151	161
NM_001006018	271	291
NM_001089394	1061	1071
NM_001281993	3061	3071
NM_001037379	1051	1061
NM_001018126	2371	2381
NM_001256029	491	501
NM_001115108	1061	1071
NM_001077467	321	331
NM_213266	3751	3761
NM_001044754	311	321
NM_001002055	1341	1351
NM_001039992	81	91
NM_001110472	601	611
NM_200531	1651	1661
NM_001044871	731	741
NM_200817	131	151
NM_212678	691	701
NM_001077449	661	671
NM_181766	1751	1761
NM_001291422	2331	2341
NM_001044891	241	261
NM_213463	1661	1671
NM_001201405	4501	4511
NM_213375	541	551
NM_001312886	701	711
NM_001130601	3471	3491
NM_205585	1251	1261
NM_001004572	1121	1131
NM_001013515	1321	1331
NM_200405	931	941
NM_213091	421	431
NM_001044324	2031	2041
NM_001083849	1461	1471
NM_200127	1271	1301
NM_001030276	2701	2721
NM_212885	1951	1971
NM_001002867	711	741
NM_182881	1111	1121
NM_001017892	261	271
NM_001347687	4921	4931
NM_001076606	861	871
NM_001007186	461	471
NM_199741	531	541
NM_213023	851	861
NM_001045148	291	301
NM_201017	861	881
NM_001007307	2911	2921
NM_200436	1271	1281
NM_001045210	781	791
NM_001199916	2061	2071
NM_001076648	1311	1321
NM_001045317	2421	2431
NM_001002096	791	801
NM_001018165	2971	2991
NM_001017782	731	741
NM_001002356	571	581
NM_199811	601	611
NM_001281468	6101	6111
NM_001006021	871	881
NM_001030086	761	771
NM_001044799	1331	1341
NM_001002548	821	831
NM_213285	921	931
NM_001100153	4211	4221
NM_001309209	541	561
NM_212909	841	851
NM_001005937	1231	1241
NM_199598	741	751
NM_200106	201	211
NM_001045404	1031	1051
NM_001320388	2441	2451
NM_001013340	1081	1091
NM_001089543	1851	1861
NM_001122786	1021	1031
NM_001002360	721	731
NM_130924	2311	2321
NM_001024379	401	411
NM_200092	991	1001
NM_001020627	1011	1021
NM_201071	221	231
NM_001128330	2161	2171
NM_001003632	141	151
NM_001020526	731	741
NM_001256176	681	691
NM_001113629	3851	3861
NM_199904	971	981
NM_001045852	601	611
NM_199805	2831	2841
NM_001079961	801	811
NM_001109830	471	491
NM_001089355	1471	1481
NM_131711	661	671
NM_001044713	801	811
NM_001317223	471	481
NM_001045225	461	471
NM_212980	1741	1771
NM_213077	4441	4451
NM_001005929	1001	1021
NM_001024923	3411	3421
NM_201166	881	891
NM_198877	11	21
NM_131882	941	951
NM_213057	1671	1691
NM_201072	431	441
NM_001002683	281	291
NM_001111150	3661	3671
NM_131030	1371	1381
NM_199272	1501	1511
NM_131371	2111	2121
NM_001328045	3421	3431
NM_001030131	2931	2941
NM_001077389	751	761
NM_213227	1131	1141
NM_201003	851	861
NM_001328387	2821	2831
NM_001077575	491	501
NM_213505	1611	1621
NM_001098756	681	691
NM_131275	481	491
NM_199550	2181	2211
NM_201341	3351	3361
NM_001076764	1151	1161
NM_213285	901	911
NM_001025529	331	341
NM_001105596	51	61
NM_001123373	9671	9691
NM_001002588	941	951
NM_001123288	1491	1511
NM_001003882	491	501
NM_001083577	1601	1611
NM_001003425	1961	1971
NM_200304	751	761
NM_001017866	611	621
NM_200016	1731	1741
NM_213016	591	601
NM_131134	1521	1541
NM_001080169	2121	2131
NM_153653	1161	1171
NM_200016	1111	1121
NM_001098488	5361	5371
NM_001080046	2431	2441
NM_001017765	1021	1031
NM_001080591	621	631
NM_001110286	1701	1721
NM_200905	1051	1061
NM_001077467	1071	1081
NM_001033745	341	371
NM_001126418	51	61
NM_001281872	2261	2271
NM_131009	181	191
NM_212995	961	971
NM_182881	241	251
NM_213165	411	421
NM_200151	881	901
NM_001320388	1721	1731
NM_001007120	1331	1341
NM_001003836	1461	1471
NM_001044757	5871	5881
NM_181330	631	641
NM_213248	951	961
NM_001020686	221	231
NM_212608	761	781
NM_001328215	5111	5131
NM_001012489	2001	2021
NM_001030284	1131	1141
NM_001005307	611	621
NM_001045056	101	111
NM_200200	1861	1881
NM_001076753	1471	1481
NM_001007353	721	731
NM_001034965	4531	4541
NM_200254	1421	1431
NM_001013531	1231	1241
NM_131386	3721	3731
NM_001316933	1481	1491
NM_001025453	761	771
NM_213059	1671	1681
NM_001003510	521	531
NM_001007063	3381	3391
NM_212633	2221	2241
NM_001002569	651	681
NM_001003484	1701	1711
NM_001145932	781	791
NM_001077279	581	601
NM_213327	771	791
NM_001077744	2711	2721
NM_200176	581	591
NM_001080184	221	231
NM_001309527	2691	2701
NM_001114428	1961	1971
NM_001110412	431	441
NM_001083832	1001	1011
NM_001045056	121	131
NM_001089394	491	501
NM_001083075	1711	1731
NM_201326	141	161
NM_001077306	851	861
NM_173268	881	891
NM_001020711	3621	3631
NM_131210	3651	3661
NM_001327871	1611	1621
NM_001109862	1611	1621
NM_001030102	901	911
NM_001007319	2351	2361
NM_001105702	1061	1091
NM_001082836	1771	1781
NM_001083554	101	111
NM_001076739	611	621
NM_212874	2301	2311
NM_212684	2381	2391
NM_200321	1021	1031
NM_001111237	1731	1741
NM_001114425	481	491
NM_001077563	721	731
NM_200623	1051	1061
NM_212652	751	761
NM_001013289	211	221
NM_001045092	2361	2381
NM_200032	491	511
NM_001007197	901	911
NM_200653	171	181
NM_199824	761	771
NM_001080642	2231	2241
NM_205752	31	41
NM_199575	1521	1531
NM_200982	1031	1041
NM_199213	2711	2721
NM_001162502	631	641
NM_001328125	121	131
NM_200683	2091	2111
NM_001045219	801	821
NM_001030124	1311	1321
NM_200096	601	611
NM_199666	1001	1011
NM_001007402	181	191
NM_213077	3951	3961
NM_199882	831	841
NM_001014344	1581	1591
NM_200673	1031	1041
NM_001114739	2031	2041
NM_131502	3091	3101
NM_001163366	551	571
NM_131370	891	951
NM_001007298	1511	1521
NM_001044858	2381	2391
NM_001007323	1081	1091
NM_194363	2881	2901
NM_199756	261	271
NM_001076570	1201	1211
NM_001009914	421	431
NM_001004513	921	931
NM_001037110	231	241
NM_001184955	901	911
NM_001024415	801	811
NM_201454	661	671
NM_001089539	3111	3121
NM_200485	1481	1491
NM_213243	431	441
NM_201313	1011	1021
NM_001017620	401	411
NM_001045244	2011	2021
NM_001256204	511	521
NM_001159912	321	331
NM_001099227	201	211
NM_212915	941	951
NM_173244	3951	3961
NM_001004563	1651	1661
NM_213506	2111	2121
NM_001039823	2231	2241
NM_001080052	2391	2401
NM_001023572	4541	4551
NM_001031675	381	391
NM_199929	31	41
NM_131510	771	781
NM_001004002	2161	2171
NM_001083075	3371	3381
NM_200637	3091	3101
NM_199713	2461	2471
NM_001114317	2971	2981
NM_001004552	2001	2011
NM_201156	1631	1641
NM_001256623	2671	2681
NM_001272084	751	761
NM_200442	731	741
NM_001029956	1751	1781
NM_001045308	951	961
NM_213168	491	501
NM_001002683	2031	2041
NM_001199725	1291	1311
NM_001045072	2201	2211
NM_001012247	13461	13481
NM_001105276	1021	1031
NM_212652	331	341
NM_001003425	291	301
NM_001040249	541	551
NM_201215	1181	1191
NM_001098488	251	261
NM_001024811	841	851
NM_200492	391	421
NM_173250	941	951
NM_001044333	2011	2021
NM_199627	1671	1681
NM_131347	1111	1121
NM_001105130	241	251
NM_001278598	1411	1421
NM_001114095	2951	2961
NM_001126390	2101	2111
NM_001327839	841	851
NM_001002717	2471	2481
NM_001089356	511	521
NM_213154	1191	1201
NM_194421	941	951
NM_001242995	221	231
NM_001083840	2061	2071
NM_200623	511	521
NM_001114313	2321	2331
NM_001347671	251	261
NM_001202442	2551	2561
NM_201587	221	231
NM_001114921	621	651
NM_201498	2011	2021
NM_200250	1371	1381
NM_001083583	1811	1821
NM_001017557	1011	1021
NM_131058	281	291
NR_125782	861	891
NM_001030123	6341	6351
NM_131797	2611	2621
NM_200228	411	421
NM_131098	11	31
NM_001014304	1441	1461
NM_001127471	1991	2001
NM_001017782	651	661
NM_131058	2501	2511
NM_001014816	2151	2161
NM_001034974	1171	1181
NM_205615	681	691
NM_001098485	1191	1201
NM_001020700	4181	4191
NM_001309458	281	291
NM_001024419	1451	1461
NM_200114	951	961
NM_001134684	2051	2061
NM_182861	1981	1991
NM_001044799	2121	2131
NM_199691	331	351
NM_001278811	261	271
NM_001004675	261	281
NM_001328537	641	651
NM_200658	81	91
NM_173277	1161	1171
NM_212599	2021	2031
NM_001326695	2261	2271
NM_001328692	1341	1351
NM_199815	2161	2171
NM_001098180	1561	1571
NM_001077579	3341	3351
NM_213077	2841	2851
NM_001256177	1651	1661
NM_183338	2311	2321
NM_001076570	771	781
NM_200333	1411	1421
NM_212671	371	381
NM_200547	581	591
NM_001045085	3821	3831
NM_200943	1451	1461
NM_201499	821	831
NM_201175	2871	2881
NM_001080089	321	351
NM_001130784	831	841
NM_001142592	3261	3271
NM_001044713	1601	1611
NM_001044925	2381	2411
NM_213518	581	591
NM_001001943	4281	4291
NM_001083577	1231	1251
NM_201017	1131	1141
NM_181330	2491	2501
NM_001199768	3831	3841
NM_001099448	2871	2891
NM_001256177	901	921
NM_001346290	2341	2351
NM_212742	731	741
NM_001077804	231	251
NM_131757	1311	1321
NM_001171033	1131	1141
NM_001045145	661	681
NM_001003440	841	851
NM_001326696	1751	1761
NM_200875	3421	3441
NM_001007440	761	781
NM_198921	1921	1931
NM_001044850	1551	1571
NM_199840	2481	2491
NM_001109840	851	861
NM_001001823	191	201
NM_001083564	1671	1681
NM_213211	541	551
NM_001328328	161	181
NM_001002620	981	991
NM_200332	3481	3491
NM_001034183	981	991
NM_001017554	3281	3291
NM_001081629	2971	2981
NM_200758	161	171
NM_001030231	2181	2191
NM_200153	1051	1071
NM_001077462	1371	1381
NM_001013540	1311	1341
NM_001113638	2161	2181
NM_001145786	701	721
NM_001007447	2471	2481
NM_001316731	1791	1811
NM_001281840	1471	1481
NM_213516	1741	1751
NM_001313694	221	231
NM_130908	471	491
NM_001122749	261	271
NM_001002427	501	511
NM_001024379	291	301
NM_001122845	791	801
NM_001114894	1951	1991
NM_001044768	4261	4271
NM_001128235	241	261
NM_200067	1101	1111
NM_001099989	6731	6741
NM_001002717	811	841
NM_001042735	541	551
NM_205707	1641	1651
NM_001002111	281	291
NM_001089515	2341	2351
NM_207066	1081	1091
NM_001328580	1781	1791
NM_001145786	2311	2321
NM_001328036	4391	4401
NM_001327871	1461	1471
NM_001114847	1431	1441
NM_001122704	351	371
NM_213412	471	511
NM_001128328	51	61
NM_199682	661	671
NM_001033721	401	411
NM_001347662	3071	3081
NM_001089418	261	271
NM_001004581	441	461
NM_200522	3721	3731
NM_131860	1281	1291
NM_183072	1611	1621
NM_001003869	201	211
NM_001122747	3131	3141
NM_001003547	1551	1561
NM_201474	1931	1961
NM_200096	1371	1381
NM_001079954	1201	1211
NM_001082828	801	811
NM_001277234	3481	3491
NM_001328001	931	941
NM_001012489	1761	1771
NM_200473	2551	2571
NM_212957	51	61
NM_001114738	671	681
NM_001005395	1681	1691
NM_001098488	6631	6641
NM_001109833	691	701
NM_001033592	2111	2131
NM_001083016	1161	1171
NM_131087	3081	3091
NM_199844	921	931
NM_200123	711	741
NM_001281993	2831	2841
NM_001037423	1321	1341
NM_001083551	2801	2811
NM_001134684	1301	1311
NM_001328165	1931	1941
NM_001045234	821	831
NM_001077600	21	41
NM_001278254	3711	3721
NM_131250	331	341
NM_001030120	1201	1211
NM_001003491	271	291
NM_001083563	1011	1031
NM_213271	1381	1391
NM_001163779	1541	1561
NM_131569	3411	3421
NM_001013508	1101	1121
NM_001025478	391	401
NM_199577	1421	1431
NM_001328563	1731	1741
NM_001077304	191	201
NM_001045125	3671	3681
NM_001320439	331	341
NM_001002222	3051	3061
NM_001326353	2751	2761
NM_200653	4281	4291
NM_001113646	601	611
NM_205565	2391	2401
NM_001123056	1301	1311
NM_131696	911	921
NM_001347668	4991	5001
NM_001098745	111	121
NM_212582	1171	1191
NM_200387	1301	1311
NM_198919	641	651
NM_001114847	891	901
NM_001076664	241	281
NM_200665	251	261
NM_001017864	1041	1061
NM_213521	1351	1361
NM_001082958	841	881
NM_001122705	691	701
NM_001110394	6061	6071
NM_001002540	791	801
NM_212578	2101	2111
NM_199919	91	101
NM_001305582	2051	2061
NM_001030144	621	631
NM_001006087	811	821
NM_001089368	2371	2381
NM_001045465	1031	1041
NM_200054	2171	2181
NM_199780	2361	2371
NM_001281997	361	381
NM_001024400	401	411
NM_001025485	561	571
NM_213048	2021	2031
NM_001281468	6221	6241
NM_001024098	1071	1081
NM_001089466	2721	2731
NM_001020502	561	571
NM_200128	411	421
NM_001003632	811	821
NM_001017545	1901	1911
NM_131524	521	531
NM_199775	841	851
NM_001013347	761	771
NM_001305543	1851	1861
NM_001030098	2301	2311
NM_001099977	331	341
NM_131447	2031	2041
NM_001029958	2871	2881
NM_001089353	741	751
NM_001083851	451	461
NM_212920	1651	1661
NM_001044793	2191	2201
NM_200205	1171	1191
NM_001308967	1271	1281
NM_001309826	2521	2531
NM_001302232	1981	1991
NM_130921	801	811
NM_001033111	1901	1911
NM_131364	461	471
NM_199888	101	111
NM_201113	2441	2451
NM_001077313	371	381
NM_214818	1241	1251
NM_001202493	4641	4651
NM_201150	111	131
NM_198921	1621	1631
NM_001115144	1581	1611
NM_001290140	2091	2101
NM_001002172	221	251
NM_001109826	501	551
NM_001003763	941	951
NM_001007396	311	331
NM_199561	261	271
NM_131834	1191	1201
NM_001007333	301	311
NM_200708	361	371
NM_001328016	1591	1611
NM_001080052	631	641
NM_001328094	671	681
NM_131700	1181	1191
NM_001098488	5571	5581
NM_199662	1761	1771
NM_199621	3551	3561
NM_201142	71	81
NM_001076712	51	61
NM_001003874	301	311
NM_205735	3181	3191
NM_213120	1211	1221
NM_001075115	351	361
NM_001328215	4091	4101
NM_213027	591	601
NM_001008630	331	341
NM_001020714	411	421
NM_001328370	4191	4201
NM_213478	1841	1851
NM_001328592	1731	1741
NM_200685	1561	1571
NM_200332	1831	1851
NM_001006104	1141	1151
NM_001111188	211	221
NM_001077167	1221	1231
NM_001083832	1101	1111
NM_201145	661	671
NM_001006057	921	931
NM_001002577	1161	1171
NM_199521	2071	2081
NM_001134725	1111	1121
NM_001114926	211	231
NM_213441	2401	2411
NM_200167	581	601
NM_001128238	231	241
NM_001003880	861	871
NM_201504	1811	1821
NM_175042	911	921
NM_182861	1741	1761
NM_001320131	2741	2751
NM_001008651	871	881
NM_001079994	921	941
NM_200927	351	361
NM_001008538	751	771
NM_199854	51	61
NM_153663	1631	1641
NM_001142955	391	401
NM_213378	151	161
NM_173285	2381	2391
NM_199628	1181	1191
NM_001123288	1521	1531
NM_001004111	831	841
NM_001328091	2021	2031
NM_199799	131	141
NM_001080807	3811	3841
NM_001347831	4301	4311
NM_001076559	3891	3901
NM_212990	121	131
NM_001007298	2161	2171
NM_213194	1171	1181
NM_001193539	231	241
NM_001015059	711	731
NM_001044313	2431	2441
NM_001163779	4931	4941
NM_201486	2731	2741
NM_001312680	4821	4831
NM_131146	1321	1331
NM_001099449	2001	2021
NM_001017650	1611	1621
NM_001331068	3821	3831
NM_001003763	1131	1141
NM_212721	1081	1091
NM_001044891	1281	1291
NM_001130589	391	401
NM_001017688	261	271
NM_131211	1871	1881
NM_001033099	401	411
NM_001004499	431	441
NM_001172564	4051	4061
NM_001045444	341	361
NM_001128530	1831	1841
NM_001009898	261	271
NM_001077141	1131	1141
NM_213033	331	341
NM_199771	1171	1191
NM_001045319	71	81
NM_001045108	2501	2511
NM_001002720	1801	1811
NM_001002717	641	651
NM_201088	171	181
NM_001030074	1451	1461
NM_001128364	2191	2201
NM_200243	1801	1811
NM_001075108	1321	1331
NM_001170835	2191	2211
NM_199579	2171	2181
NM_001002592	291	301
NM_001020479	2711	2721
NM_001008609	1661	1671
NM_212563	2171	2181
NM_001320131	371	381
NM_001098485	2071	2081
NM_001017728	301	311
NM_001048067	1981	2001
NM_199851	521	531
NM_001113477	2281	2291
NM_001044767	3601	3631
NM_001145932	871	891
NM_001326472	3261	3271
NM_198813	721	731
NM_199218	1451	1461
NM_001128230	3021	3031
NM_001037370	2281	2291
NM_001123049	2241	2251
NM_201299	731	741
NM_212563	2831	2841
NM_213139	1191	1201
NM_001098265	1031	1041
NM_001045182	1081	1091
NM_200557	121	131
NM_207069	511	521
NM_001045284	511	521
NM_001045125	3481	3491
NM_001122619	1981	1991
NM_001076596	241	251
NM_199931	781	791
NM_214716	1561	1571
NM_001302640	1301	1311
NM_001099977	2061	2071
NM_001290093	751	771
NM_205652	871	891
NM_200309	371	381
NM_001128545	4241	4251
NM_001309826	2151	2161
NM_001025517	1461	1471
NM_201317	421	441
NM_001320133	921	931
NM_199770	771	781
NM_001082840	441	451
NM_131791	491	501
NM_001044858	4481	4491
NM_001082805	1041	1051
NM_214708	1011	1021
NM_001005991	1001	1021
NM_001089340	41	51
NM_001079951	5251	5261
NM_130922	1151	1161
NM_199898	1801	1811
NM_212869	1121	1131
NM_001089361	1031	1041
NM_001015060	1871	1881
NM_001076619	411	421
NM_001077325	1161	1191
NM_200478	2831	2841
NM_199840	1991	2021
NM_200445	1721	1731
NM_001002083	671	681
NM_001080057	1401	1411
NM_001111281	5191	5201
NM_200115	1691	1701
NM_001045023	2831	2841
NM_001171221	431	441
NM_201175	4161	4171
NM_001114894	1261	1271
NM_001098265	3251	3261
NM_205585	691	701
NM_130994	2041	2051
NM_001075116	1231	1241
NM_001020711	3641	3651
NM_201030	671	681
NM_199432	1961	1971
NM_200931	1341	1351
NM_001164394	7911	7921
NM_001008607	1271	1291
NM_200537	1271	1301
NM_213231	591	601
NM_199929	1471	1481
NM_001303057	311	331
NM_131790	761	771
NM_001100962	2111	2121
NM_213486	1641	1651
NM_200432	1691	1701
NM_001003873	371	381
NM_001110382	921	931
NM_131562	1251	1261
NM_200885	2131	2141
NM_001145786	1981	2011
NM_001033718	1571	1581
NM_001077627	1761	1771
NM_001002222	151	161
NM_001076722	521	531
NM_001001941	641	651
NM_197933	231	241
NM_001005992	651	661
NM_001312882	601	611
NM_001003535	971	981
NM_001045230	791	801
NM_001164027	3891	3901
NM_001114317	1121	1131
NM_001134725	1821	1831
NM_198874	321	331
NM_001326695	2021	2031
NM_001199722	3681	3691
NM_001324455	2511	2521
NM_001089469	391	401
NM_001006077	771	781
NM_001017360	1761	1771
NM_001346238	511	521
NM_199689	1251	1271
NM_200285	1101	1111
NM_001113800	691	701
NM_200275	581	591
NM_001002418	611	671
NM_200153	631	651
NM_200526	221	231
NM_130994	11	21
NM_214682	271	281
NM_213281	901	911
NM_001045106	3051	3061
NM_194382	7161	7171
NM_001002651	2981	2991
NM_001080686	391	401
NM_200948	961	971
NM_201299	931	941
NM_201465	251	261
NM_212769	671	681
NM_001044850	1621	1631
NM_131224	1571	1581
NM_001045851	31	41
NM_001082837	1901	1911
NM_001122700	761	781
NM_001017544	941	951
NM_001025471	411	421
NM_001002433	521	531
NM_001003578	601	611
NM_131788	151	161
NM_001025169	421	431
NM_001105598	871	881
NM_001003747	741	751
NM_001328125	371	381
NM_001002120	661	711
NM_001044779	1031	1041
NM_001109867	881	891
NM_001007435	951	961
NM_199739	231	241
NM_001143840	7751	7761
NM_199891	1431	1441
NM_212740	211	221
NM_001122749	791	801
NM_001045083	2441	2451
NM_001003439	1001	1011
NM_001123305	1151	1161
NM_001115123	1231	1241
NM_001017544	1581	1591
NM_001017604	1751	1761
NM_001327898	1391	1401
NM_001305471	1651	1661
NM_001089418	361	371
NM_001326696	2001	2021
NM_212621	61	71
NM_001020472	1001	1011
NM_198874	2151	2161
NM_213355	1321	1331
NM_001044785	3051	3061
NM_198809	21	31
NM_001190485	181	191
NM_200151	1091	1101
NM_199744	1301	1311
NM_001126428	1921	1931
NM_001202420	3741	3751
NM_001002514	591	601
NM_001003988	601	611
NM_001013352	1031	1071
NM_001328554	1191	1201
NM_131047	81	91
NM_001099739	481	491
NM_001326472	5051	5061
NM_212995	1161	1171
NM_199924	31	41
NM_001313687	5161	5171
NM_001020510	2861	2881
NM_001199768	7151	7161
NM_001309188	951	961
NM_131596	1061	1071
NM_001327885	651	661
NM_001256622	1471	1491
NM_201498	1871	1881
NM_001013288	641	651
NM_001114847	621	631
NM_001030075	2001	2011
NM_001013303	641	661
NM_001003614	1731	1741
NM_001017660	1001	1021
NM_001034180	1611	1621
NM_001351651	1001	1011
NM_199909	1391	1401
NM_001044921	581	591
NM_001089330	1611	1631
NM_001258228	4511	4521
NM_001040389	1941	1951
NM_001201571	201	211
NM_001008611	1061	1071
NM_001002468	431	441
NM_001013479	1031	1041
NM_001002577	1051	1071
NM_001113796	1191	1241
NM_200987	741	761
NM_001040299	971	981
NM_001270536	661	671
NM_001037430	1441	1451
NM_001003571	231	251
NM_001126433	1051	1061
NM_214818	1491	1501
NM_214772	1511	1541
NM_001030188	2301	2311
NM_205657	1001	1021
NM_001099989	3141	3151
NM_001122698	1791	1801
NM_213111	671	681
NM_001044792	1211	1221
NM_001326407	1701	1711
NM_001008602	491	511
NM_001100044	891	901
NM_001017610	621	631
NM_201097	2521	2531
NM_001104940	1571	1591
NM_001199754	2821	2831
NM_001008621	141	151
NM_200270	341	351
NM_213528	351	361
NM_001128074	2011	2021
NM_200505	1641	1651
NM_001326401	911	921
NM_001044338	951	971
NM_001002743	1351	1361
NM_001126477	2081	2091
NM_213433	1401	1411
NM_001326695	901	921
NM_199820	1081	1091
NM_001161453	7181	7191
NM_001089407	2861	2871
NM_214700	1351	1371
NM_001193674	4601	4611
NM_001044785	2731	2741
NM_201148	1571	1581
NM_213403	2611	2621
NM_001007207	1421	1431
NM_213059	371	391
NM_001166446	1591	1611
NM_214695	1831	1841
NM_001002164	831	841
NM_001130783	791	801
NM_212757	451	461
NM_001045155	2151	2161
NM_001044869	1971	1981
NM_199801	951	961
NM_214772	1571	1581
NM_001006081	551	561
NM_200375	141	191
NM_001014361	1441	1451
NM_001326540	1311	1321
NM_001042687	2431	2441
NM_001025450	2011	2021
NM_001006078	1061	1071
NM_001044888	31	41
NM_182865	2611	2631
NM_001076720	1081	1091
NM_001017577	21	51
NM_201068	1491	1501
NM_001098184	931	941
NM_212644	4231	4241
NM_001328390	511	531
NM_001128699	1641	1651
NM_001045008	1951	1961
NM_001002420	1991	2011
NM_001017835	691	711
NM_213465	251	261
NM_001004578	521	531
NM_001326481	1671	1691
NM_207055	871	881
NM_153667	841	861
NM_001077763	4691	4701
NM_001328215	181	191
NM_001007052	371	391
NM_199430	1281	1291
NM_001122784	2491	2501
NM_001177453	601	611
NM_001004528	2471	2481
NM_001017585	641	651
NM_001007161	1381	1391
NM_001201421	351	361
NM_173273	801	811
NM_001045340	1191	1211
NM_001020625	381	391
NM_001007773	1321	1331
NM_001079961	2511	2521
NM_001309267	461	471
NM_001080030	5061	5071
NM_212582	2851	2861
NM_001326705	2481	2491
NM_200098	341	361
NM_213038	3291	3311
NM_001167661	1601	1611
NM_173221	911	921
NM_212664	811	821
NM_001327886	421	431
NM_131002	2671	2681
NM_001310042	2431	2441
NM_001045241	31	51
NM_131790	191	201
NM_001100962	2171	2181
NM_001142592	4081	4091
NM_001030104	521	531
NM_200605	1421	1431
NM_001013266	231	241
NM_198922	251	271
NM_199660	921	931
NM_001044310	3081	3091
NM_001105114	1701	1711
NM_001079912	1751	1761
NM_001353866	4991	5001
NM_001004552	51	61
NM_131670	1651	1671
NM_201113	2911	2921
NM_212685	251	271
NM_001044927	1361	1371
NM_001114741	2801	2811
NM_001123233	2591	2601
NM_001199726	1021	1031
NM_001025506	541	551
NR_102288	1001	1011
NM_001324549	1611	1621
NM_001030094	531	541
NM_001077567	2961	2971
NM_199835	2351	2361
NM_001079994	51	71
NM_213097	2481	2491
NM_001105127	441	451
NM_001007452	21	41
NM_001076739	411	421
NM_001012487	2941	2951
NM_201202	2151	2161
NM_212643	961	971
NM_001080683	401	411
NM_214694	1521	1531
NM_001076666	1061	1071
NM_130931	571	581
NM_001003449	451	461
NM_198368	1081	1091
NM_001327898	1901	1921
NM_200779	3761	3771
NM_001044818	881	891
NM_001020744	601	611
NM_200202	1791	1801
NM_001077806	2931	2951
NM_001083015	561	571
NM_001159971	861	871
NM_131448	1301	1311
NM_001031826	261	271
NM_001308825	3711	3721
NM_001045083	2071	2081
NM_201316	1801	1811
NM_001328196	671	701
NM_001006031	801	811
NM_001007435	831	841
NM_001145584	11471	11491
NM_001353855	4661	4671
NM_001346290	6731	6751
NM_178295	2051	2061
NM_001139438	2631	2651
NM_001007345	1701	1711
NM_001077579	1001	1011
NM_001020737	661	671
NM_001005939	31	51
NM_001008650	551	561
NM_201184	2881	2891
NM_212738	661	671
NM_199862	171	181
NM_213539	1381	1391
NM_001045210	351	361
NM_001308556	601	611
NM_001080008	411	421
NM_199651	1591	1601
NM_152972	2791	2801
NM_131580	371	381
NM_200866	1131	1141
NM_001033746	301	311
NM_001242938	1551	1561
NM_001017584	861	871
NM_212940	1191	1201
NM_199664	231	241
NM_001001400	1271	1281
NM_214689	1341	1351
NM_001003475	401	411
NM_153674	841	851
NM_001089369	1061	1071
NM_001256603	101	111
NM_001077579	1371	1381
NM_001077537	1591	1601
NM_201341	2921	2931
NM_207087	961	971
NM_199554	1121	1131
NM_001351640	1091	1101
NM_001089498	2451	2461
NM_213257	1631	1641
NM_001126400	1291	1311
NM_001044819	2541	2551
NM_182967	1951	1961
NM_001077167	1411	1421
NM_200912	2331	2341
NM_001145633	2721	2731
NM_001328413	3551	3561
NM_001320326	731	741
NM_212922	191	201
NM_131612	2421	2431
NM_131630	2691	2711
NM_001328116	2951	2961
NM_001017836	491	521
NM_131323	871	881
NM_001001409	421	431
NM_001100091	451	461
NM_201652	2001	2011
NM_001327904	1741	1751
NM_001320175	711	721
NM_213087	1021	1031
NM_201582	531	541
NM_001002867	6641	6651
NM_001089363	1131	1141
NM_131715	301	311
NM_001002874	661	671
NM_199582	1311	1321
NM_001001941	3441	3451
NM_205707	3691	3701
NM_001077393	1461	1471
NM_001098184	5951	5961
NM_213135	1111	1121
NM_001024379	881	891
NM_182888	381	391
NM_199555	1141	1151
NM_200134	1851	1871
NM_001001399	511	521
NM_001045000	551	561
NM_131025	1071	1081
NM_001163798	2821	2831
NM_199646	701	711
NM_131621	3311	3321
NM_198072	2121	2131
NM_199787	1191	1201
NM_001082879	501	511
NM_213532	451	461
NM_001044354	1341	1351
NM_001045456	431	441
NM_213354	1661	1671
NM_001291422	2471	2481
NM_201120	481	491
NM_213002	191	201
NM_001002681	1131	1141
NM_200508	1671	1681
NM_001008578	1491	1511
NM_200531	921	951
NM_213415	1281	1291
NM_001020779	1101	1111
NM_200498	1011	1021
NM_001243875	1201	1211
NM_001159914	1651	1661
NM_001164028	131	141
NM_001110414	671	681
NM_199707	1201	1211
NM_001045334	2981	3001
NM_200604	1761	1771
NM_001017604	1191	1201
NM_001014304	751	761
NM_200409	1431	1441
NM_130994	441	451
NM_001193543	1471	1481
NM_205703	101	111
NM_199429	1721	1731
NM_001018107	2791	2811
NM_001045404	971	991
NM_001114898	561	571
NM_200400	381	391
NM_001003728	471	481
NM_001083838	1581	1591
NM_200142	1581	1591
NM_178436	371	381
NM_001030075	3061	3071
NM_001252559	81	91
[truncated: 99,830 more rows]
