# Supplementary material for: RNA structural dynamics regulate early embryogenesis through controlling transcriptome fate and function
Source: Genome Biol. 2020 May 18;21:120. doi: 10.1186/s13059-020-02022-2 (PMC7236375; doi:10.1186/s13059-020-02022-2)
Supplement: Supplementary file 5 — Table S4. Results of motif enrichment analysis in 3′ UTR structurally variable regions. [file 13059_2020_2022_MOESM5_ESM.xlsx]

## Sheet: Readme
Table S4. Results of motif enrichment analysis in 3'UTR structurally variable regions
Sheet Name	Description
de novo 4 h.p.f. -> 6 h.p.f.	De novo motifs enriched in 3' UTR structurally dynamic regions between 4 h.p.f. and 6 h.p.f.
de novo 4 h.p.f. -> 6 h.p.f. (tomtom)	Motifs comparison result for de novo motifs enriched in 3'UTR structurally dynamic regions between 4 h.p.f. and 6 h.p.f.
de novo way2345	De novo motifs enriched in hot structurally dynamic regions at 3' UTR shared by at least two comparisons
de novo way2345 (tomtom)	Motifs comparison result for de novo motifs enriched in hot structurally dynamic regions at 3' UTR shared by at least two comparisons
RBP search way2345	RBP motifs enriched in hot structurally dynamic regions at 3'UTR shared by at least two comparisons
RBP search 4 h.p.f. -> 6 h.p.f.	RBP motifs enriched in structurally dynamic windows at 3'UTR between 4 h.p.f. and 6 h.p.f.

## Sheet: 4 h.p.f. -> 6 h.p.f.
Word	Pos	Neg	P-value
TDTWD	16132	9717	1.8e-740
TNAWW	9885	6940	2.6e-173
AHWWA	4869	3442	1.4e-66
WWTTC	2019	1401	2.8e-28
AHTWG	1974	1423	5.6e-23
TSTGTGTG	251	100	1.6e-16
WTWGT	924	621	2.4e-15
ACACACAC	168	70	8.1e-11
TWCTKT	534	351	2.9e-10
TAAST	374	233	4.7e-09
CATTW	298	178	1.8e-08
ATASA	485	338	1.3e-07
TTRTG	545	398	7.6e-07

## Sheet: 4 h.p.f. -> 6 h.p.f. (tomtom)
Query_ID	Target_ID	Target name	Optimal_offset	p-value	E-value	q-value	Overlap	Query_consensus	Target_consensus	Orientation
TDTWD	CPEB1	CPEB1	0	0.00267477	0.147113	0.0490375	5	TTTTT	TTTTTAT	+
TDTWD	M025_0.6	HNRNPC/CL1, RALY	1	0.00267477	0.147113	0.0490375	5	TTTTT	ATTTTTT	+
TDTWD	ELAVL1	ELAVL1	2	0.00717276	0.394502	0.0986254	5	TTTTT	TTTGTTT	+
TDTWD	M350_0.6	ZFP36/36L1/36L2	3	0.0236754	1.30215	0.234019	5	TTTTT	TTATTTATT	+
TDTWD	M330_0.6	HuR, ELAVL2/3/4	3	0.036933	2.03132	0.290188	5	TTTTT	TTTTATTTT	+
TDTWD	M227_0.6	PTBP1/2/3	2	0.06353	3.49415	0.419778	5	TTTTT	CTTTTCT	+
TDTWD	M120_0.6	CPEB2/3/4	0	0.068691	3.77801	0.419778	5	TTTTT	GTTTGGG	+
TNAWW	M195_0.6	SF3B4	0	0.0230258	1.26642	0.945999	5	TGAAA	TCAAAAG	+
TNAWW	M074_0.6	TARDBP	0	0.0343999	1.892	0.945999	5	TGAAA	TGAATGAG	+
TNAWW	M160_0.6	KHDRBS1/2/3	1	0.0614581	3.38019	1	5	TGAAA	ATAAAAG	+
AHWWA	M062_0.6	SART3	2	0.00707641	0.389202	0.389202	5	ACAAA	AGAAAAA	+
AHWWA	M262_0.6	QKI	1	0.0225297	1.23913	0.433578	5	ACAAA	TACTAAC	+
AHWWA	M160_0.6	KHDRBS1/2/3	2	0.0244002	1.34201	0.433578	5	ACAAA	ATAAAAG	+
AHWWA	M027_0.6	HNRNPL	2	0.0394162	2.16789	0.433578	5	ACAAA	ACACACA	+
AHWWA	M144_0.6	PABPC1/1L/3/4	0	0.0394162	2.16789	0.433578	5	ACAAA	GAAAACC	+
AHWWA	M195_0.6	SF3B4	0	0.0513159	2.82237	0.467734	5	ACAAA	TCAAAAG	+
AHWWA	M162_0.6	PABPC5	0	0.0595297	3.27414	0.467734	5	ACAAA	AGAAAAT	+
WWTTC	M227_0.6	PTBP1/2/3	1	0.00207301	0.114015	0.114015	5	TTTTC	CTTTTCT	+
WWTTC	CPEB1	CPEB1	0	0.0287512	1.58132	0.395329	5	TTTTC	TTTTTAT	+
WWTTC	M025_0.6	HNRNPC/CL1, RALY	1	0.0287512	1.58132	0.395329	5	TTTTC	ATTTTTT	+
WWTTC	M330_0.6	HuR, ELAVL2/3/4	0	0.0581253	3.19689	0.639378	5	TTTTC	TTTTATTTT	+
WWTTC	M136_0.6	SNRPA/B2	0	0.076391	4.20151	0.700251	5	TTTTC	ATTGCACA	+
AHTWG	M036_0.6	MATR3	2	0.0442166	2.43191	1	5	ACTTG	AATCTTG	+
AHTWG	M037_0.6	MBNL1/2/3	1	0.0547002	3.00851	1	5	ACTTG	AGCTTGC	+
AHTWG	M330_0.6	HuR, ELAVL2/3/4	4	0.0706831	3.88757	1	5	ACTTG	TTTTATTTT	+
AHTWG	M025_0.6	HNRNPC/CL1, RALY	0	0.0834227	4.58825	1	5	ACTTG	ATTTTTT	+
TSTGTGTG	M175_0.6	RBM24/38	0	0.00420054	0.23103	0.23103	7	TGTGTGTG	AGTGTGA	+
TSTGTGTG	M120_0.6	CPEB2/3/4	-1	0.0122071	0.671391	0.335695	7	TGTGTGTG	GTTTGGG	+
TSTGTGTG	ELAVL1	ELAVL1	0	0.0371754	2.04465	0.617903	7	TGTGTGTG	TTTGTTT	+
TSTGTGTG	M298_0.6	RBFOX1/2/3	0	0.0626862	3.44774	0.617903	6	TGTGTGTG	TGCATG	+
TSTGTGTG	M117_0.6	CELF6	0	0.0685685	3.77127	0.617903	7	TGTGTGTG	GTGGTGT	+
TSTGTGTG	M054_0.6	RBM8A	-1	0.074136	4.07748	0.617903	7	TGTGTGTG	GCGCGCG	+
TSTGTGTG	M122_0.6	MEX3B/C/D	0	0.0820278	4.51153	0.617903	8	TGTGTGTG	AGAGTATA	+
WTWGT	ELAVL1	ELAVL1	0	0.0025609	0.14085	0.14085	5	TTTGT	TTTGTTT	+
WTWGT	M120_0.6	CPEB2/3/4	1	0.0169551	0.932533	0.34647	5	TTTGT	GTTTGGG	+
WTWGT	M175_0.6	RBM24/38	0	0.0268505	1.47678	0.34647	5	TTTGT	AGTGTGA	+
WTWGT	CPEB1	CPEB1	0	0.0440962	2.42529	0.34647	5	TTTGT	TTTTTAT	+
WTWGT	M025_0.6	HNRNPC/CL1, RALY	1	0.0440962	2.42529	0.34647	5	TTTGT	ATTTTTT	+
WTWGT	M227_0.6	PTBP1/2/3	2	0.07671	4.21905	0.52172	5	TTTGT	CTTTTCT	+
ACACACAC	M027_0.6	HNRNPL	0	1.9383e-05	0.00106606	0.00106606	7	ACACACAC	ACACACA	+
ACACACAC	M140_0.6	ENOX1/2	-1	0.0143164	0.787402	0.393701	7	ACACACAC	CAGACAG	+
ACACACAC	M147_0.6	CNOT4	-1	0.0538109	2.9596	0.716379	7	ACACACAC	GACAGAT	+
ACACACAC	M262_0.6	QKI	1	0.0589643	3.24303	0.716379	6	ACACACAC	TACTAAC	+
ACACACAC	M062_0.6	SART3	0	0.0651254	3.5819	0.716379	7	ACACACAC	AGAAAAA	+
ACACACAC	M106_0.6	SRSF1/9	0	0.0801994	4.41097	0.735162	8	ACACACAC	CAGGACAA	+
TWCTKT	M025_0.6	HNRNPC/CL1, RALY	1	0.0111789	0.614838	0.201378	6	TTCTGT	ATTTTTT	+
TWCTKT	ELAVL1	ELAVL1	1	0.0148686	0.817771	0.201378	6	TTCTGT	TTTGTTT	+
TWCTKT	M350_0.6	ZFP36/36L1/36L2	0	0.0183071	1.00689	0.201378	6	TTCTGT	TTATTTATT	+
TWCTKT	M330_0.6	HuR, ELAVL2/3/4	2	0.0407184	2.23951	0.373252	6	TTCTGT	TTTTATTTT	+
TWCTKT	M120_0.6	CPEB2/3/4	0	0.055033	3.02681	0.39538	6	TTCTGT	GTTTGGG	+
TWCTKT	M227_0.6	PTBP1/2/3	1	0.0575098	3.16304	0.39538	6	TTCTGT	CTTTTCT	+
TWCTKT	CPEB1	CPEB1	1	0.0673499	3.70424	0.411582	6	TTCTGT	TTTTTAT	+
TWCTKT	M036_0.6	MATR3	1	0.0885606	4.87083	0.487083	6	TTCTGT	AATCTTG	+
CATTW	M330_0.6	HuR, ELAVL2/3/4	3	0.068068	3.74374	0.999998	5	CATTA	TTTTATTTT	+
ATASA	M140_0.6	ENOX1/2	1	0.0139345	0.766399	0.401989	5	ATACA	CAGACAG	+
ATASA	M027_0.6	HNRNPL	2	0.0170986	0.940421	0.401989	5	ATACA	ACACACA	+
ATASA	M161_0.6	RBM6	1	0.0219267	1.20597	0.401989	5	ATACA	AATCCAG	+
ATASA	M160_0.6	KHDRBS1/2/3	0	0.0308141	1.69478	0.423694	5	ATACA	ATAAAAG	+
ATASA	M147_0.6	CNOT4	1	0.0671508	3.6933	0.738659	5	ATACA	GACAGAT	+
TTRTG	M120_0.6	CPEB2/3/4	2	0.0115076	0.632917	0.632917	5	TTGTG	GTTTGGG	+
TTRTG	ELAVL1	ELAVL1	1	0.0394668	2.17067	0.694602	5	TTGTG	TTTGTTT	+
TTRTG	M117_0.6	CELF6	1	0.0505165	2.77841	0.694602	5	TTGTG	GTGGTGT	+
TTRTG	M175_0.6	RBM24/38	1	0.0505165	2.77841	0.694602	5	TTGTG	AGTGTGA	+
TTRTG	M350_0.6	ZFP36/36L1/36L2	4	0.0786572	4.32614	0.865229	5	TTGTG	TTATTTATT	+

## Sheet: way2345
Word	Pos	Neg	P-value
WNUUD	25696	16629	1.9e-718
UDWAW	9467	6467	5e-148
WBUGU	4649	3286	1.5e-57
WNUAG	2863	2061	5e-32
UWUDC	2567	1860	8.3e-28
WAAUR	2570	1976	1.1e-19
UWGUV	1094	728	2.5e-18
UARSU	807	525	3.7e-15
CACDCACA	262	117	3.1e-14
AAMAAAA	424	238	1.9e-13
CWUUU	602	386	2.6e-12
UAAUY	470	311	6.2e-09
UGMUU	1244	984	1.4e-08
UACAUW	200	107	5.9e-08
UUABU	271	169	6.3e-07

## Sheet: way2345(tomtom)
Query_ID	Target_ID	Target name	Optimal_offset	p-value	E-value	q-value	Overlap	Query_consensus	Target_consensus	Orientation
WNUUD	ELAVL1	ELAVL1	2	0.000972947	0.0535121	0.0535121	5	UGUUU	UUUGUUU	+
WNUUD	M350_0.6	ZFP36/36L1/36L2	1	0.0153	0.841501	0.263558	5	UGUUU	UUAUUUAUU	+
WNUUD	ARE	ARE	2	0.0154328	0.848806	0.263558	5	UGUUU	UUUAUUUAUU	+
WNUUD	M330_0.6	HuR, ELAVL2/3/4	3	0.0256678	1.41173	0.263558	5	UGUUU	UUUUAUUUU	+
WNUUD	Urich	Urich	3	0.0278212	1.53016	0.263558	5	UGUUU	UUUUUUUU	+
WNUUD	CPEB1	CPEB1	0	0.0335437	1.8449	0.263558	5	UGUUU	UUUUUAU	+
WNUUD	M025_0.6	HNRNPC/CL1, RALY	1	0.0335437	1.8449	0.263558	5	UGUUU	AUUUUUU	+
WNUUD	M037_0.6	MBNL1/2/3	0	0.0712929	3.92111	0.490139	5	UGUUU	AGCUUGC	+
UDWAW	M160_0.6	KHDRBS1/2/3	1	0.0274437	1.5094	0.812342	5	UGAAA	AUAAAAG	+
UDWAW	M100_0.6	PUM1/2	0	0.0295397	1.62468	0.812342	5	UGAAA	UGUAAAU	+
UDWAW	M074_0.6	TARDBP	0	0.0593895	3.26642	0.920966	5	UGAAA	UGAAUGAG	+
WBUGU	M175_0.6	RBM24/38	0	0.00103804	0.0570922	0.0570922	5	UGUGU	AGUGUGA	+
WBUGU	ELAVL1	ELAVL1	0	0.0281097	1.54603	0.773017	5	UGUGU	UUUGUUU	+
WBUGU	M117_0.6	CELF6	2	0.0777786	4.27782	1	5	UGUGU	GUGGUGU	+
WNUAG	M047_0.6	RBM28	1	7.58405e-05	0.00417123	0.00417123	5	UGUAG	GAGUAGA	+
UWUDC	M227_0.6	PTBP1/2/3	1	0.00438236	0.24103	0.24103	5	UUUUC	CUUUUCU	+
UWUDC	CPEB1	CPEB1	0	0.0541347	2.97741	0.791207	5	UUUUC	UUUUUAU	+
UWUDC	M025_0.6	HNRNPC/CL1, RALY	1	0.0541347	2.97741	0.791207	5	UUUUC	AUUUUUU	+
UWUDC	Urich	Urich	0	0.0685966	3.77281	0.791207	5	UUUUC	UUUUUUUU	+
UWUDC	M136_0.6	SNRPA/B2	0	0.0770822	4.23952	0.791207	5	UUUUC	AUUGCACA	+
UWUDC	M037_0.6	MBNL1/2/3	2	0.0872999	4.8015	0.791207	5	UUUUC	AGCUUGC	+
WAAUR	M160_0.6	KHDRBS1/2/3	2	0.0427703	2.35237	1	5	AAAUG	AUAAAAG	+
WAAUR	M195_0.6	SF3B4	2	0.0684655	3.7656	1	5	AAAUG	UCAAAAG	+
UWGUV	M120_0.6	CPEB2/3/4	2	0.0231469	1.27308	0.77665	5	UUGUG	GUUUGGG	+
UWGUV	M175_0.6	RBM24/38	1	0.0313848	1.72616	0.77665	5	UUGUG	AGUGUGA	+
UWGUV	M256_0.6	ACO1	0	0.0532337	2.92786	0.77665	5	UUGUG	CAGUGC	+
UWGUV	M117_0.6	CELF6	1	0.0564837	3.1066	0.77665	5	UUGUG	GUGGUGU	+
CACDCACA	M027_0.6	HNRNPL	-1	1.9764e-05	0.00108702	0.00108702	7	CACACACA	ACACACA	+
CACDCACA	M140_0.6	ENOX1/2	0	0.0145763	0.801699	0.400849	7	CACACACA	CAGACAG	+
CACDCACA	M147_0.6	CNOT4	-2	0.0298451	1.64148	0.54716	6	CACACACA	GACAGAU	+
CACDCACA	M062_0.6	SART3	-1	0.0679137	3.73525	0.747051	7	CACACACA	AGAAAAA	+
CACDCACA	M262_0.6	QKI	0	0.0679137	3.73525	0.747051	7	CACACACA	UACUAAC	+
AAMAAAA	M062_0.6	SART3	0	0.000415612	0.0228587	0.0228587	7	AAAAAAA	AGAAAAA	+
AAMAAAA	M160_0.6	KHDRBS1/2/3	0	0.0104703	0.575867	0.287933	7	AAAAAAA	AUAAAAG	+
AAMAAAA	M162_0.6	PABPC5	0	0.0159596	0.87778	0.292593	7	AAAAAAA	AGAAAAU	+
AAMAAAA	M195_0.6	SF3B4	-1	0.0396601	2.18131	0.545327	6	AAAAAAA	UCAAAAG	+
AAMAAAA	M144_0.6	PABPC1/1L/3/4	0	0.0596471	3.28059	0.656118	7	AAAAAAA	GAAAACC	+
CWUUU	M330_0.6	HuR, ELAVL2/3/4	3	0.00647826	0.356304	0.194567	5	CAUUU	UUUUAUUUU	+
CWUUU	M227_0.6	PTBP1/2/3	0	0.0089429	0.49186	0.194567	5	CAUUU	CUUUUCU	+
CWUUU	miR430	miR430	1	0.0106127	0.5837	0.194567	5	CAUUU	GCACUU	+
CWUUU	M350_0.6	ZFP36/36L1/36L2	1	0.0378315	2.08073	0.505071	5	CAUUU	UUAUUUAUU	+
CWUUU	ARE	ARE	2	0.0497074	2.73391	0.505071	5	CAUUU	UUUAUUUAUU	+
CWUUU	M036_0.6	MATR3	0	0.0550987	3.03043	0.505071	5	CAUUU	AAUCUUG	+
CWUUU	M025_0.6	HNRNPC/CL1, RALY	0	0.0777966	4.27881	0.611259	5	CAUUU	AUUUUUU	+
UGMUU	M037_0.6	MBNL1/2/3	0	0.00783071	0.430689	0.430689	5	UGCUU	AGCUUGC	+
UGMUU	M298_0.6	RBFOX1/2/3	0	0.0236125	1.29869	0.649344	5	UGCUU	UGCAUG	+
UGMUU	ELAVL1	ELAVL1	2	0.0719251	3.95588	0.96757	5	UGCUU	UUUGUUU	+
UGMUU	M350_0.6	ZFP36/36L1/36L2	0	0.0823533	4.52943	0.96757	5	UGCUU	UUAUUUAUU	+
UACAUW	M100_0.6	PUM1/2	2	0.00380222	0.209122	0.209122	5	UACAUU	UGUAAAU	+
UACAUW	M250_0.6	CSDA,YBX1/2	0	0.0576651	3.17158	0.719331	6	UACAUU	AACAUC	+
UACAUW	M298_0.6	RBFOX1/2/3	0	0.0576651	3.17158	0.719331	6	UACAUU	UGCAUG	+
UACAUW	M002_0.6	ANKHD1, ANKRD17	1	0.0623664	3.43015	0.719331	6	UACAUU	AGACGUA	+
UACAUW	M027_0.6	HNRNPL	-1	0.0782515	4.30383	0.719331	5	UACAUU	ACACACA	+
UACAUW	M330_0.6	HuR, ELAVL2/3/4	1	0.0784725	4.31599	0.719331	6	UACAUU	UUUUAUUUU	+
UUABU	M350_0.6	ZFP36/36L1/36L2	0	0.00812788	0.447033	0.192289	5	UUACU	UUAUUUAUU	+
UUABU	M330_0.6	HuR, ELAVL2/3/4	2	0.00934945	0.51422	0.192289	5	UUACU	UUUUAUUUU	+
UUABU	ARE	ARE	1	0.0104885	0.576867	0.192289	5	UUACU	UUUAUUUAUU	+
UUABU	M227_0.6	PTBP1/2/3	2	0.0187718	1.03245	0.258112	5	UUACU	CUUUUCU	+
UUABU	ELAVL1	ELAVL1	1	0.0758412	4.17126	0.6331	5	UUACU	UUUGUUU	+
UUABU	CPEB1	CPEB1	0	0.0812766	4.47022	0.6331	5	UUACU	UUUUUAU	+
UUABU	M025_0.6	HNRNPC/CL1, RALY	1	0.0812766	4.47022	0.6331	5	UUACU	AUUUUUU	+
# Tomtom (Motif Comparison Tool): Version 5.0.2 compiled on Sep 5 2018 at 11:55:43
# The format of this file is described at http://meme-suite.org/doc/tomtom-output-format.html.
# tomtom -xalph -no-ssc -oc ./tomtom_5_Collapsed-used -verbosity 1 -min-overlap 5 -dist pearson -evalue -thresh 5 -norc ./dreme.txt /Share/home/zhangqf7/gongjing/zebrafish/script/zhangting/paris_RBP/motif_CISBP_RNA_narrow/Collapsed.used.meme

## Sheet: RBP search way2345
Motif_name	RBP_name	fimo1_motif	fimo1_not_motif	fimo2_motif	fimo2_not_motif	odd	pvalue	pvalue_adj
ARE	ARE	5143	33771	2434	36480	2.28248	6.78808e-240	3.80133e-238
CPEB1	CPEB1	1159	37755	413	38501	2.86174	1.62181e-83	9.08212e-82
ELAVL1A	ELAVL1A	6482	32432	3132	35782	2.28338	8.04884e-297	4.50735e-295
M002_0.6	ANKHD1, ANKRD17	567	38347	754	38160	0.748322	2.34518e-07	1.3133e-05
M016_0.6	FMR1	524	38390	1305	37609	0.393364	1.98564e-78	1.11196e-76
M020_0.6	FXR1/2	531	38383	1271	37643	0.409727	2.01448e-71	1.12811e-69
M022_0.6	HNRNPA1/1L2/1P7/2B1/3	340	38574	293	38621	1.16182	0.0663013	1
M025_0.6	HNRNPC/CL1, RALY	6343	32571	2926	35988	2.39523	2.65491115449e-319	1.48675024652e-317
M026_0.6	HNRNPK	717	38197	1004	37910	0.708778	2.80621e-12	1.57148e-10
M027_0.6	HNRNPL	2013	36901	1941	36973	1.03912	0.246476	1
M035_0.6	LIN28A/B	756	38158	1963	36951	0.372943	1.05778e-126	5.92359e-125
M036_0.6	MATR3	1595	37319	1198	37716	1.34555	2.11471e-14	1.18424e-12
M037_0.6	MBNL1/2/3	1043	37871	862	38052	1.21576	2.93638e-05	0.00164438
M043_0.6	PCBP1/2/3/4	797	38117	911	38003	0.872246	0.00568198	0.318191
M047_0.6	RBM28	810	38104	542	38372	1.50498	2.0024e-13	1.12134e-11
M054_0.6	RBM8A	164	38750	286	38628	0.571621	8.6807e-09	4.86119e-07
M061_0.6	SAMD4A/B	698	38216	1670	37244	0.407333	6.59965e-94	3.69581e-92
M062_0.6	SART3	2725	36189	2387	36527	1.15226	1.07248e-06	6.00591e-05
M074_0.6	TARDBP	1866	37048	1768	37146	1.05822	0.0993362	1
M083_0.6	ZC3H10	419	38495	934	37980	0.442606	3.27432e-46	1.83362e-44
M100_0.6	PUM1/2	3321	35593	1824	37090	1.8973	1.1104e-104	6.21823e-103
M106_0.6	SRSF1/9	902	38012	1938	36976	0.452743	4.77958e-89	2.67656e-87
M109_0.6	RBM4/4B/14	111	38803	265	38649	0.417206	1.02895e-15	5.76215e-14
M117_0.6	CELF6	3085	35829	2035	36879	1.5604	2.69642e-52	1.50999e-50
M120_0.6	CPEB2/3/4	4378	34536	2482	36432	1.86074	2.34539e-128	1.31342e-126
M122_0.6	MEX3B/C/D	1542	37372	1593	37321	0.966664	0.362009	1
M126_0.6	SRSF4/5/6	636	38278	1686	37228	0.366877	4.60633e-112	2.57955e-110
M136_0.6	SNRPA/B2	1509	37405	1199	37715	1.26898	1.44681e-09	8.10212e-08
M140_0.6	ENOX1/2	898	38016	1588	37326	0.555227	2.34547e-45	1.31346e-43
M141_0.6	ESRP1/2	643	38271	996	37918	0.639628	1.13554e-18	6.35905e-17
M144_0.6	PABPC1/1L/3/4	2540	36374	2188	36726	1.17211	1.36894e-07	7.66605e-06
M145_0.6	RBM5	904	38010	1943	36971	0.452542	2.39468e-89	1.34102e-87
M147_0.6	CNOT4	1419	37495	2133	36781	0.652592	1.08193e-34	6.05881e-33
M148_0.6	PABPN1/1L	2412	36502	2765	36149	0.863897	4.0786e-07	2.28401e-05
M151_0.6	HNRNPF/H1/H2	406	38508	882	38032	0.454627	1.52252e-41	8.52613e-40
M160_0.6	KHDRBS1/2/3	2908	36006	1976	36938	1.50975	2.55194e-43	1.42909e-41
M161_0.6	RBM6	1129	37785	1360	37554	0.825072	2.74841e-06	0.000153911
M162_0.6	PABPC5	2734	36180	2364	36550	1.16834	8.88255e-08	4.97423e-06
M175_0.6	RBM24/38	2379	36535	1797	37117	1.34496	2.11911e-20	1.1867e-18
M195_0.6	SF3B4	1948	36966	1707	37207	1.14862	4.74726e-05	0.00265847
M209_0.6	RBM45	466	38448	1165	37749	0.392728	1.83513e-70	1.02768e-68
M227_0.6	PTBP1/2/3	5071	33843	2624	36290	2.07228	1.27966e-192	7.16611e-191
M231_0.6	EIF2S1	982	37932	1122	37792	0.871993	0.00211827	0.118623
M250_0.6	CSDA,YBX1/2	1592	37322	1798	37116	0.880541	0.000316809	0.0177413
M256_0.6	ACO1	1694	37220	1778	37136	0.950606	0.149543	1
M262_0.6	QKI	670	38244	479	38435	1.40573	1.51837e-08	8.50285e-07
M290_0.6	EIF4B	1025	37889	1172	37742	0.87118	0.00157341	0.0881111
M298_0.6	RBFOX1/2/3	1017	37897	1152	37762	0.879668	0.00351177	0.196659
M307_0.6	NONO, SFPQ	750	38164	1162	37752	0.638471	1.26073e-21	7.0601e-20
M330_0.6	HuR, ELAVL2/3/4	7438	31476	3405	35509	2.46432	0	0
M350_0.6	ZFP36/36L1/36L2	5183	33731	2583	36331	2.16125	7.98036e-216	4.469e-214
M352_0.6	SRSF2/8	1094	37820	2102	36812	0.506585	4.02249e-75	2.25259e-73
Urich	Urich	5768	33146	2525	36389	2.50786	6.32007786029e-318	3.53924360176e-316
m6A	m6A	955	37959	1195	37719	0.79411	1.67525e-07	9.38141e-06
miR430	miR430	452	38462	294	38620	1.54373	6.76149e-09	3.78643e-07

## Sheet: RBP search 4 h.p.f. -> 6 h.p.f.
Motif_name	RBP_name	fimo1_motif	fimo1_not_motif	fimo2_motif	fimo2_not_motif	odd	pvalue	pvalue_adj
ARE	ARE	3198	21378	1237	23339	2.82243	1.00001e-215	5.50006e-214
CPEB1	CPEB1	584	23992	214	24362	2.77106	4.66599e-41	2.56629e-39
ELAVL1A	ELAVL1A	3514	21062	1681	22895	2.27235	3.44294e-162	1.89362e-160
M002_0.6	ANKHD1, ANKRD17	261	24315	362	24214	0.718	5.34177e-05	0.00293797
M016_0.6	FMR1	264	24312	602	23974	0.432441	1.20811e-31	6.64459e-30
M020_0.6	FXR1/2	268	24308	584	23992	0.452938	3.28163e-28	1.8049e-26
M022_0.6	HNRNPA1/1L2/1P7/2B1/3	192	24384	111	24465	1.73548	3.5498e-06	0.000195239
M025_0.6	HNRNPC/CL1, RALY	3569	21007	1574	23002	2.48281	2.82625e-194	1.55444e-192
M026_0.6	HNRNPK	299	24277	445	24131	0.667869	7.74391e-08	4.25915e-06
M027_0.6	HNRNPL	1357	23219	990	23586	1.39237	8.71337e-15	4.79235e-13
M035_0.6	LIN28A/B	353	24223	1011	23565	0.339675	1.05987e-75	5.8293e-74
M036_0.6	MATR3	833	23743	590	23986	1.42631	6.79085e-11	3.73497e-09
M037_0.6	MBNL1/2/3	381	24195	402	24174	0.946939	0.471237	1
M043_0.6	PCBP1/2/3/4	326	24250	463	24113	0.700126	9.9523e-07	5.47377e-05
M047_0.6	RBM28	395	24181	275	24301	1.44349	3.47391e-06	0.000191065
M054_0.6	RBM8A	65	24511	146	24430	0.443734	2.31649e-08	1.27407e-06
M061_0.6	SAMD4A/B	286	24290	738	23838	0.380322	1.51479e-47	8.33135e-46
M062_0.6	SART3	1924	22652	1295	23281	1.52697	1.58371e-30	8.71041e-29
M074_0.6	TARDBP	865	23711	824	23752	1.05157	0.321948	1
M083_0.6	ZC3H10	160	24416	437	24139	0.361979	5.15817e-31	2.83699e-29
M100_0.6	PUM1/2	1781	22795	875	23701	2.11633	3.14496e-74	1.72973e-72
M106_0.6	SRSF1/9	468	24108	864	23712	0.532769	2.12502e-28	1.16876e-26
M109_0.6	RBM4/4B/14	48	24528	137	24439	0.349094	3.79218e-11	2.0857e-09
M117_0.6	CELF6	1385	23191	976	23600	1.44408	6.3346e-18	3.48403e-16
M120_0.6	CPEB2/3/4	2107	22469	1249	23327	1.75137	1.51237e-53	8.31802e-52
M122_0.6	MEX3B/C/D	784	23792	745	23831	1.05407	0.323504	1
M126_0.6	SRSF4/5/6	313	24263	868	23708	0.352351	3.88947e-62	2.13921e-60
M136_0.6	SNRPA/B2	640	23936	565	24011	1.13629	0.0308578	1
M140_0.6	ENOX1/2	478	24098	703	23873	0.673595	3.66589e-11	2.01624e-09
M141_0.6	ESRP1/2	348	24228	499	24077	0.693048	1.86756e-07	1.02716e-05
M144_0.6	PABPC1/1L/3/4	1744	22832	1164	23412	1.53634	1.19903e-28	6.59465e-27
M145_0.6	RBM5	442	24134	968	23608	0.44666	1.01641e-46	5.59024e-45
M147_0.6	CNOT4	739	23837	1045	23531	0.698099	1.66906e-13	9.17982e-12
M148_0.6	PABPN1/1L	1517	23059	1442	23134	1.05543	0.160526	1
M151_0.6	HNRNPF/H1/H2	211	24365	455	24121	0.459092	8.94708e-22	4.9209e-20
M160_0.6	KHDRBS1/2/3	2063	22513	1039	23537	2.07588	1.09266e-81	6.00963e-80
M161_0.6	RBM6	532	24044	639	23937	0.828846	0.00170646	0.0938552
M162_0.6	PABPC5	1812	22764	1248	23328	1.4879	5.77318e-26	3.17525e-24
M175_0.6	RBM24/38	1067	23509	854	23722	1.26073	7.85335e-07	4.31934e-05
M195_0.6	SF3B4	1159	23417	834	23742	1.40898	1.12896e-13	6.20928e-12
M209_0.6	RBM45	243	24333	561	24015	0.427494	3.19153e-30	1.75534e-28
M227_0.6	PTBP1/2/3	2661	21915	1418	23158	1.98303	5.28777e-93	2.90827e-91
M231_0.6	EIF2S1	463	24113	561	24015	0.821958	0.00217424	0.119583
M250_0.6	CSDA,YBX1/2	1012	23564	886	23690	1.14832	0.00342071	0.188139
M256_0.6	ACO1	715	23861	885	23691	0.802154	1.71446e-05	0.000942952
M262_0.6	QKI	355	24221	222	24354	1.60788	2.83607e-08	1.55984e-06
M290_0.6	EIF4B	523	24053	520	24056	1.00589	0.950092	1
M298_0.6	RBFOX1/2/3	486	24090	588	23988	0.823031	0.00181985	0.100092
M307_0.6	NONO, SFPQ	411	24165	574	24002	0.711198	1.73718e-07	9.5545e-06
M330_0.6	HuR, ELAVL2/3/4	4312	20264	1798	22778	2.69575	1.7749e-265	9.76194e-264
M350_0.6	ZFP36/36L1/36L2	2898	21678	1267	23309	2.45938	2.288e-157	1.2584e-155
M352_0.6	SRSF2/8	526	24050	1068	23508	0.48141	5.62143e-44	3.09179e-42
Urich	Urich	3213	21363	1356	23220	2.57544	1.30166e-187	7.15914e-186
m6A	m6A	432	24144	558	24018	0.770153	5.86163e-05	0.0032239
miR430	miR430	145	24431	121	24455	1.19952	0.157218	1
