# Supplementary material for: RNA structural dynamics regulate early embryogenesis through controlling transcriptome fate and function
Source: Genome Biol. 2020 May 18;21:120. doi: 10.1186/s13059-020-02022-2 (PMC7236375; doi:10.1186/s13059-020-02022-2)
Supplement: Supplementary file 6 — Table S5. Summary of DLE element in structurally variable regions during early development and its associated biological function. [file 13059_2020_2022_MOESM6_ESM.xlsx]

## Sheet: readme
Table S5. Summary of DLE element in structurally variable regions during early development and its associated biological function
Sheets named in "egg_cell1","cell1_cell4","cell4_cell64","cell64_sphere" and "sphere_shield" listed the location of the DLE elements that are structurally vary between stages together with the predicted structure in dot format and the corresponding SHAPE values
Sheet named in "GSEA" listed the result of the gene set enrichment analysis on the union of the transcripts harboring the structurally variable DLE element across all comparisons

## Sheet: egg_cell1
transcript.start_end	dot(egg)	dot(cell1)	shape(egg)	shape(cell1)
NM_001001818.1693_1723	(((...........))).(((.....))).	.(((..............))).........	0.04,0.027,0.0,0.202,0.092,0.321,0.585,0.127,0.111,0.057,0.192,0.932,0.684,0.256,1.0,0.209,0.169,0.237,0.053,0.175,0.892,0.773,0.26,1.0,0.287,0.201,0.238,0.0,0.015,0.095	0.042,0.037,0.0,0.024,0.252,0.159,0.548,0.364,0.0,0.0,0.202,0.722,0.781,0.286,0.873,0.509,0.432,0.596,0.198,0.306,0.985,1.0,0.329,0.881,0.525,0.519,0.747,0.233,0.139,0.183
NM_001001840.3028_3058	.......((.......))............	..............................	0.145,0.006,0.0,0.493,0.057,0.0,0.205,0.0,0.083,0.037,0.118,0.34,0.132,0.662,0.354,0.065,0.114,0.947,0.395,0.572,0.593,0.537,0.872,0.612,0.625,0.163,0.153,0.339,0.095,0.101	0.111,0.298,0.123,0.215,0.179,0.0,0.55,0.115,0.171,0.361,0.56,0.7,0.081,0.711,0.952,0.174,0.411,0.958,0.757,0.528,0.77,1.0,1.0,0.537,1.0,0.61,0.383,0.616,0.47,0.176
NM_001001943.3093_3123	..(((((.......))))).((......))	..(((((.......)))))...........	0.795,0.161,0.063,0.0,0.0,0.032,0.308,0.145,0.216,0.931,0.559,0.268,0.164,0.184,0.046,0.035,0.142,0.017,0.004,0.113,0.158,0.035,0.189,0.086,0.259,0.905,0.278,0.6,0.127,0.226	1.0,0.618,0.232,0.0,0.0,0.231,0.354,0.548,0.388,0.922,0.517,0.577,0.285,0.171,0.157,0.073,0.28,0.028,0.015,0.159,0.291,0.0,0.348,0.109,0.389,1.0,0.599,0.445,0.306,0.371
NM_001002130.1397_1427	.((((.((((........))))))))....	.(((((((..........)))).)))....	0.377,0.0,0.027,0.115,0.0,0.233,0.225,0.104,0.0,0.176,0.406,0.0,0.092,0.017,0.15,0.384,0.107,0.55,0.081,0.372,0.125,0.139,0.088,0.047,0.664,0.445,0.225,0.022,0.039,0.3	0.74,0.282,0.108,0.076,0.096,0.0,0.274,0.0,0.623,0.198,0.628,0.277,0.039,0.249,0.354,0.461,0.366,0.229,0.358,0.473,0.0,0.437,0.264,0.094,0.342,0.57,0.23,0.202,0.135,0.377
NM_001002165.1991_2021	((....(((((......))..)))...)).	...((.(((((......))..)))...)).	0.147,0.245,0.051,0.335,0.189,0.073,0.026,0.397,0.265,0.102,0.051,0.513,0.982,1.0,0.484,0.29,0.263,0.479,0.64,0.016,0.0,0.169,0.176,0.441,0.409,1.0,0.324,0.024,0.004,0.09	0.201,0.778,0.176,0.223,0.253,0.216,0.239,0.252,0.285,0.369,0.096,0.784,1.0,1.0,0.428,0.446,0.636,0.617,1.0,0.585,0.171,0.174,0.157,0.111,0.201,0.678,0.6,0.09,0.0,0.0
NM_001002211.1130_1160	(((.....)))....(((........))).	(((.....)))...................	0.12,0.057,0.045,0.274,0.354,0.148,0.453,0.169,0.106,0.0,0.186,0.366,0.124,0.448,0.099,0.0,0.101,0.003,0.0,0.079,0.186,0.03,0.0,0.176,0.693,0.1,0.426,0.271,0.022,0.227	0.156,0.227,0.063,0.153,0.504,0.066,0.479,0.327,0.01,0.119,0.423,0.354,0.132,0.505,0.363,0.257,0.28,0.073,0.073,0.146,0.31,0.228,0.19,0.196,0.064,0.083,0.464,0.41,0.114,0.371
NM_001002319.1572_1602	..(((...)))(((((.........)))))	..(((...))).((((.........)))).	0.229,0.254,0.14,0.065,0.048,0.0,0.462,0.22,0.198,0.278,0.098,0.308,-1,-1,0.099,0.123,0.123,-1,-1,-1,-1,-1,-1,-1,-1,-1,-1,-1,-1,-1	0.547,0.388,0.039,0.125,0.177,0.364,0.323,0.427,0.546,0.3,0.242,0.532,0.205,0.33,0.0,0.303,0.369,0.655,1.0,0.32,0.546,0.494,0.597,0.132,0.498,0.519,0.569,0.273,0.327,0.553
NM_001002551.991_1021	.((((.(((.....))))))).........	.(((((.........).)))).........	0.129,0.19,0.061,0.27,0.0,0.255,0.406,0.195,0.048,0.343,0.327,0.879,0.339,0.036,0.805,0.582,0.105,0.212,0.222,0.343,0.457,0.865,0.236,0.871,0.656,1.0,0.607,0.83,0.332,0.709	0.468,0.524,0.096,0.062,0.253,0.333,0.206,0.077,0.351,0.618,0.529,0.891,0.737,0.302,0.904,0.591,0.423,0.317,0.213,0.284,0.354,1.0,0.497,0.921,0.852,1.0,0.447,0.786,0.331,0.866
NM_001002575.768_798	(((.((.(((((.....))))))))))...	.......(((((.....)))))........	0.627,0.527,0.258,0.827,0.099,0.18,0.089,0.317,0.179,0.298,0.413,0.169,1.0,0.625,0.827,0.949,1.0,0.255,1.0,0.666,0.051,0.424,0.588,0.387,0.448,0.291,0.535,0.524,0.215,0.644	1.0,1.0,0.54,1.0,0.361,0.506,0.469,0.279,0.449,0.547,0.297,0.352,1.0,0.791,0.931,1.0,1.0,0.613,1.0,0.399,0.306,0.765,0.492,0.724,0.361,0.578,1.0,0.349,0.361,1.0
NM_001002605.1095_1125	.(((......)))....(((((...)))))	((((.(((.....)))...)))).......	0.394,0.148,0.0,0.017,0.201,0.319,0.76,1.0,0.583,0.194,0.249,0.024,0.36,0.463,0.277,0.566,0.333,0.045,0.0,0.053,0.439,0.152,0.068,0.199,0.027,1.0,0.492,0.103,0.159,0.007	0.559,0.363,0.048,0.017,0.482,0.273,0.356,0.602,0.998,0.921,0.233,0.171,0.288,0.312,0.216,0.48,0.434,0.098,0.236,0.0,0.463,0.081,0.387,0.378,0.082,1.0,0.327,0.427,0.065,0.0
NM_001002613.1316_1346	(((...)))((((((......))))))...	.(((....))).(((......)))......	0.157,0.071,0.121,0.099,0.065,0.225,0.2,0.182,0.179,0.107,0.007,0.192,0.294,0.016,0.102,0.798,0.688,0.982,0.0,0.005,0.147,0.0,0.009,0.51,0.16,0.131,0.274,0.318,0.0,0.0	0.086,0.222,0.261,0.394,0.256,0.043,0.296,0.511,0.079,0.072,0.228,0.75,0.724,0.305,0.51,0.788,0.685,0.48,0.136,0.272,0.184,0.051,0.128,0.66,0.459,0.431,0.27,0.508,0.09,0.105
NM_001002676.1733_1763	........((....((......))...)).	..............................	0.139,0.388,0.024,0.171,0.18,0.252,0.176,0.224,0.124,0.818,0.384,0.935,0.021,0.146,0.469,0.135,0.12,0.228,0.649,0.247,0.777,0.834,0.099,0.041,0.084,0.263,0.355,0.135,0.156,0.261	0.265,0.555,0.106,0.227,0.298,0.171,0.421,0.564,0.102,1.0,0.591,0.975,0.393,0.466,0.692,0.567,0.429,0.466,1.0,0.233,1.0,1.0,0.53,0.314,0.356,0.454,0.577,0.308,0.571,0.562
NM_001002676.2663_2693	(((....((((.((....))))))...)))	.......((((.((....))))))......	0.0,0.102,0.032,0.421,0.064,0.112,0.028,0.092,0.161,0.184,0.056,0.408,0.379,0.474,0.271,0.827,0.809,0.699,0.094,0.237,0.086,0.054,0.021,0.666,0.31,0.954,0.725,0.408,0.18,0.033	0.089,0.361,0.174,0.623,0.418,0.35,0.152,0.254,0.353,0.317,0.128,0.446,0.652,0.532,0.434,1.0,1.0,1.0,0.364,0.682,0.172,0.304,0.262,0.563,0.585,1.0,0.906,1.0,0.449,0.099
NM_001003529.2486_2516	..(((((((...)))))))...........	..((((((.....))))))...........	0.886,0.57,0.096,0.201,0.117,0.11,0.098,0.409,0.714,0.339,0.239,1.0,0.673,0.041,0.045,0.013,0.001,0.024,0.14,0.03,0.733,0.359,0.416,0.209,0.432,0.772,0.778,0.644,0.503,0.291	1.0,1.0,0.117,0.002,0.173,0.096,0.091,0.274,0.847,0.163,0.042,1.0,1.0,0.09,0.03,0.079,0.194,0.063,0.233,0.06,0.673,0.358,0.185,0.126,0.165,0.627,0.802,0.448,0.179,0.389
NM_001003619.1663_1693	.............((((((....)))))).	....................(((...))).	0.097,0.373,0.155,0.442,0.326,0.371,0.468,0.826,0.443,0.179,0.525,0.08,0.302,0.533,0.327,0.248,0.111,0.376,0.291,0.205,0.246,0.28,0.552,0.396,0.596,0.492,0.201,0.0,0.418,0.367	0.352,1.0,0.461,0.28,0.791,0.279,0.35,1.0,0.529,0.651,0.511,0.268,0.367,0.418,0.58,0.487,0.297,1.0,0.519,0.438,0.206,0.274,0.56,0.479,0.751,1.0,0.561,0.223,0.16,0.515
NM_001003622.1326_1356	..((.........)).((((...))))...	..((.........))...............	0.048,0.0,0.0,0.0,0.008,0.0,0.148,0.297,0.208,0.209,0.341,0.164,0.211,0.004,0.438,0.388,0.261,0.073,0.445,0.306,0.365,0.489,0.889,0.129,0.251,0.312,0.092,0.04,0.14,0.104	0.178,0.255,0.015,0.105,0.317,0.076,0.146,0.054,0.32,0.19,1.0,0.565,0.559,0.191,0.379,0.563,0.455,0.551,1.0,0.735,0.388,0.909,0.729,0.756,0.847,0.967,0.312,0.505,0.497,1.0
NM_001003623.1862_1892	(((((...))))).(((........)))..	...(((..........)))...........	0.519,0.49,0.18,0.283,0.321,0.205,0.075,0.204,0.324,0.342,0.398,0.209,0.189,0.592,0.262,0.427,0.212,0.687,0.363,0.834,0.586,0.874,0.232,1.0,0.186,1.0,0.332,0.868,0.165,0.345	0.673,0.661,0.293,0.394,0.432,0.251,0.139,0.351,0.407,0.365,0.281,0.403,0.348,0.369,0.441,0.506,0.455,0.9,0.345,0.736,0.748,1.0,0.174,0.823,0.511,0.999,0.42,1.0,0.513,0.51
NM_001003746.1703_1733	(((.....)))....(((........))).	...............(((........))).	0.124,0.197,0.083,0.649,0.457,0.004,0.255,0.145,0.476,0.135,0.006,0.045,0.167,0.071,0.351,0.0,0.29,0.194,0.005,0.222,0.901,0.259,0.091,0.684,0.321,0.357,0.757,0.325,0.027,0.48	0.639,0.728,0.318,0.792,1.0,0.072,0.645,0.198,0.713,0.113,0.676,0.048,0.17,0.312,0.528,0.313,0.134,0.076,0.506,0.424,0.402,0.544,0.545,0.786,0.211,0.467,0.775,0.124,0.0,0.351
NM_001003781.1020_1050	.......(((((....)).)))........	(((.....)))...................	0.242,0.044,0.017,0.262,0.09,0.025,0.0,0.0,0.0,0.132,0.039,0.298,0.38,0.069,0.221,0.462,0.081,0.0,0.247,0.418,0.233,0.937,0.336,0.296,0.76,1.0,0.361,0.348,1.0,0.258	0.209,0.241,0.218,0.119,0.505,0.0,0.0,0.148,0.181,0.291,0.363,0.366,0.554,0.227,0.33,0.463,0.615,0.388,0.181,0.798,0.831,0.726,0.422,0.699,1.0,1.0,0.349,0.556,0.827,0.503
NM_001004579.1931_1961	.......((((...))))((((....))))	..................((((....))))	0.427,0.249,0.124,0.236,0.007,0.421,0.037,0.106,0.506,0.022,0.138,0.09,0.035,0.266,0.532,0.5,0.332,0.026,0.086,0.175,0.452,0.633,0.325,0.532,0.261,0.819,1.0,0.065,0.089,0.355	0.299,0.894,0.34,0.13,0.131,0.186,0.165,0.0,1.0,0.226,0.223,0.565,0.374,0.51,0.549,0.904,0.385,0.288,0.323,0.218,0.127,1.0,0.567,0.606,0.6,1.0,0.663,0.464,0.322,0.512
NM_001004589.2450_2480	..((((((..(((....)))..))).))).	...((((.....((.....)).....))))	0.236,0.281,0.062,0.164,0.0,0.115,0.388,0.375,0.481,0.886,0.444,0.486,0.427,0.7,0.476,1.0,0.193,0.254,0.375,0.0,0.187,0.265,0.132,0.295,0.88,0.396,0.404,0.117,0.061,0.008	0.418,0.639,0.117,0.132,0.0,0.03,0.488,0.314,0.377,0.691,0.955,0.526,0.782,1.0,0.589,1.0,0.397,0.351,0.626,0.157,0.351,0.123,0.294,0.29,0.803,0.844,0.444,0.146,0.166,0.01
NM_001004665.637_667	(((......))).(((.......)))....	..........(((...........)))...	0.696,0.668,0.0,0.253,0.05,0.078,0.94,0.946,0.179,0.0,0.362,0.3,0.12,0.331,0.017,0.38,0.089,0.256,1.0,0.503,0.401,1.0,0.0,0.216,0.099,0.835,0.497,0.75,0.703,0.42	1.0,0.991,0.155,0.53,0.237,0.664,0.936,1.0,0.498,0.026,0.338,0.442,0.067,0.323,0.342,0.468,0.0,0.622,0.673,0.813,0.005,0.577,0.585,0.716,0.287,0.194,0.339,0.61,1.0,0.598
NM_001004667.953_983	..(((((.(((...))))))))........	..(((((........)))))..........	0.507,0.317,0.158,0.139,0.009,0.502,0.25,0.031,0.175,0.072,0.06,0.847,0.499,0.385,0.111,0.289,0.185,0.151,0.208,0.237,0.708,1.0,0.42,0.476,0.199,0.692,0.315,0.923,0.452,0.137	0.722,0.756,0.254,0.0,0.128,0.304,0.146,0.087,0.161,0.121,0.189,0.863,0.592,0.26,0.159,0.259,0.401,0.222,0.335,0.215,0.771,1.0,0.629,0.622,0.456,0.985,0.196,0.905,0.553,0.297
NM_001005583.1296_1326	.(((..........))).............	..............................	0.609,1.0,0.039,0.293,0.111,0.3,0.331,0.401,0.751,0.9,0.196,0.329,0.037,0.0,0.017,0.017,0.193,0.0,0.195,0.089,0.0,0.036,0.648,1.0,0.922,1.0,0.669,0.41,0.0,0.056	0.997,1.0,0.195,0.264,0.031,0.212,0.0,0.617,0.769,0.209,0.314,0.054,0.014,0.127,0.211,0.303,0.449,0.188,0.0,0.063,0.0,0.199,0.966,1.0,0.657,1.0,0.743,0.784,0.124,0.0
NM_001005989.1421_1451	((((.((..........)).))))......	..(((...)))...................	0.127,0.266,0.098,0.479,0.009,0.463,0.712,0.32,0.239,0.066,0.456,0.156,0.32,1.0,0.873,0.329,0.286,0.0,0.123,0.592,0.245,1.0,0.152,0.005,0.37,0.116,0.057,0.349,0.232,0.112	0.106,0.371,0.114,0.089,0.296,0.217,0.573,0.236,0.197,0.169,0.161,0.768,0.757,0.449,0.903,0.294,0.504,0.131,0.368,0.99,0.432,1.0,0.653,0.269,0.465,0.623,0.232,0.341,0.55,0.214
NM_001006021.1642_1672	..(((((((.(((....))))))))))...	..(((((((((.......)))))))))...	0.277,0.235,0.146,0.446,0.06,0.375,0.546,0.508,1.0,0.48,0.924,0.309,0.51,0.263,0.502,0.267,0.538,0.384,0.248,0.577,0.091,0.094,0.019,0.266,0.149,0.129,0.091,0.0,0.239,0.207	0.524,0.786,0.186,0.236,0.645,0.036,1.0,0.981,0.998,0.518,1.0,0.776,1.0,0.314,0.433,0.542,0.608,0.718,0.125,0.997,0.216,0.165,0.186,0.299,0.14,0.48,0.189,0.0,0.186,0.408
NM_001006057.927_957	.(((....))).((((....))))......	..((....)).(((((....))))).....	0.371,0.253,0.224,0.622,0.099,0.53,0.256,0.102,0.088,0.056,0.225,0.399,0.301,0.745,0.173,0.298,0.03,0.055,0.061,0.323,0.332,0.076,0.09,0.06,0.12,0.327,0.538,0.253,0.286,0.263	0.759,0.537,0.35,0.291,0.126,0.39,0.434,0.144,0.078,0.094,0.18,0.172,0.243,0.553,0.095,0.239,0.085,0.084,0.086,0.157,0.308,0.031,0.061,0.036,0.076,0.207,0.288,0.16,0.153,0.317
NM_001006076.2283_2313	((((....)))).....((((.....))))	((((....))))....((.((...)).)).	0.543,0.071,0.021,0.491,0.141,0.0,0.009,0.212,0.088,0.501,0.134,0.0,0.112,0.472,0.436,0.618,0.343,0.094,0.099,0.0,0.18,0.57,0.691,0.458,0.02,0.126,0.275,0.0,0.179,0.272	0.742,0.339,0.314,0.237,0.484,0.179,0.077,0.496,0.0,0.72,0.269,0.047,0.31,0.343,0.782,1.0,0.548,0.381,0.337,0.3,0.313,0.559,1.0,0.887,0.225,0.101,0.459,0.214,0.28,0.419
NM_001007059.511_541	..((....)).......(.(((...)))).	..((....))....................	0.512,0.396,0.106,0.461,0.0,1.0,0.909,0.382,0.065,0.14,0.575,0.22,0.238,0.14,0.019,0.064,0.155,0.576,0.203,0.088,0.277,0.296,1.0,0.268,0.402,0.116,0.63,0.128,0.948,1.0	0.998,0.933,0.33,0.354,0.181,1.0,1.0,0.839,0.225,0.237,0.439,0.621,0.044,0.204,0.099,0.133,0.333,0.574,0.332,0.389,0.286,0.163,1.0,0.53,0.605,0.555,0.455,0.49,0.509,1.0
NM_001007060.2138_2168	.....(((...............)))....	(((...(((....)))...)))........	0.141,0.283,0.081,0.408,0.0,0.347,0.093,0.032,0.296,0.703,0.072,0.166,0.156,0.232,0.218,0.476,0.373,0.681,0.303,0.557,0.736,1.0,1.0,0.493,0.304,0.563,1.0,0.33,0.307,0.066	0.31,0.431,0.217,0.094,0.057,0.169,0.197,0.083,0.198,0.175,0.174,0.0,0.305,0.0,0.039,0.155,0.345,0.435,0.414,0.238,0.529,0.887,1.0,0.841,0.374,0.795,0.898,0.859,0.513,0.252
NM_001007182.1686_1716	.(((.(((...))).)))............	.............((((...))))......	0.249,0.626,0.268,0.603,0.323,0.117,0.28,0.0,0.037,0.134,0.227,0.079,0.004,0.13,0.07,0.127,0.07,0.132,0.054,0.145,0.071,0.367,0.088,0.334,0.093,0.142,0.134,0.797,0.423,0.069	0.769,1.0,0.824,0.572,0.53,0.059,0.201,0.556,0.073,0.199,0.149,0.214,0.089,0.292,0.032,0.087,0.239,0.044,0.088,0.204,0.182,0.154,0.2,0.1,0.346,0.172,0.085,0.806,0.917,0.174
NM_001007290.1037_1067	(((((.......((...))......)))))	.((((......))).).((.......))..	0.329,0.25,0.086,0.357,0.059,0.139,0.227,0.026,0.146,0.401,0.183,0.022,0.0,0.022,0.162,0.01,0.044,0.336,0.299,0.235,0.557,0.707,0.183,0.29,0.202,0.525,0.062,0.044,0.0,0.344	0.537,0.779,0.216,0.283,0.11,0.351,0.409,0.0,0.375,0.33,0.396,0.137,0.204,0.0,0.0,0.0,0.112,0.037,0.2,0.673,0.942,0.629,0.173,0.261,0.242,0.376,0.304,0.194,0.378,0.237
NM_001007317.1271_1301	..((((........)))).((.....))..	..((((........))))............	0.479,0.322,0.041,0.14,0.023,0.021,0.053,0.969,0.887,0.268,1.0,0.311,0.385,0.444,0.012,0.012,0.064,0.006,0.0,0.185,0.092,0.145,0.013,0.019,0.054,0.762,0.068,0.582,0.118,0.132	0.811,0.719,0.092,0.104,0.032,0.13,0.134,0.622,1.0,0.235,1.0,0.727,0.7,0.857,0.168,0.021,0.114,0.013,0.076,0.361,0.29,0.044,0.0,0.094,0.163,0.918,0.312,0.523,0.342,0.221
NM_001007343.1620_1650	(((((...))))).((......))......	(((((........)))))............	0.291,0.073,0.0,0.151,0.039,0.24,0.335,0.298,0.253,0.0,0.208,0.301,0.0,0.468,0.173,0.177,0.328,0.415,0.178,0.42,0.632,1.0,0.449,0.041,0.079,0.0,0.823,0.997,0.469,0.584	0.741,0.487,0.493,0.299,0.612,0.167,0.17,1.0,1.0,0.598,0.057,0.22,0.398,0.464,0.223,0.056,0.171,0.09,0.0,0.202,0.471,1.0,0.184,0.11,0.033,0.487,0.893,0.84,0.088,1.0
NM_001007411.1746_1776	(((....)))....................	.............(((((......))).))	0.178,0.401,0.054,0.251,0.04,0.14,0.099,0.159,0.219,0.715,0.317,0.057,0.116,0.285,0.15,0.45,0.525,0.751,0.364,0.213,0.288,0.929,0.193,0.27,0.072,0.763,0.046,0.175,0.323,0.367	0.273,0.655,0.144,0.345,0.082,0.085,0.225,0.109,0.263,0.606,0.239,0.094,0.091,0.144,0.016,0.214,0.244,0.329,0.28,0.191,0.054,0.476,0.09,0.338,0.15,0.223,0.048,0.104,0.216,0.237
NM_001008575.1975_2005	......(((.(((..........))).)))	.......((.(((..........))).)).	0.465,0.391,0.072,0.77,0.0,0.27,0.075,0.251,0.158,0.0,0.0,0.147,0.403,0.561,0.319,0.609,0.158,0.058,0.345,0.603,0.07,0.453,0.225,0.347,0.44,0.0,0.6,0.129,0.105,0.471	0.171,0.545,0.377,1.0,0.297,0.479,0.627,0.703,0.218,0.372,0.0,0.58,0.427,0.999,0.425,0.539,1.0,0.466,0.713,0.508,0.337,0.349,0.148,0.157,0.586,0.14,0.263,0.168,0.0,0.579
NM_001008586.2474_2504	...(((..((.......))....)))....	...(((.................)))....	0.25,0.166,0.139,0.222,0.115,0.119,0.474,0.566,0.321,0.164,0.273,0.182,0.227,0.03,0.033,0.586,0.192,0.309,0.516,0.081,0.631,0.307,0.381,0.168,0.111,0.655,0.181,0.311,0.646,0.665	0.0,0.523,0.219,0.245,0.108,0.149,0.312,0.892,0.809,0.243,0.332,0.094,0.636,0.575,0.302,0.611,0.296,0.461,0.53,0.057,0.367,0.455,0.414,0.247,0.385,0.273,0.439,0.4,0.812,0.453
NM_001008621.1661_1691	((((((.....))....)))).........	((((.............)))).........	0.001,0.099,0.144,0.244,0.098,0.0,1.0,1.0,0.718,1.0,0.68,0.405,0.797,1.0,0.244,0.244,0.143,0.184,0.14,0.126,0.0,0.047,0.027,1.0,0.19,0.261,0.448,0.388,0.652,1.0	0.009,0.206,0.111,0.255,0.265,0.383,1.0,1.0,0.972,1.0,0.923,0.215,0.802,1.0,0.517,0.34,0.151,0.071,0.014,0.186,0.052,0.0,0.151,0.236,0.124,0.005,0.251,0.626,0.725,0.671
NM_001009914.1656_1686	.(((..........))).(((.....))).	..........(((((....)))))......	0.168,0.234,0.053,0.489,0.147,0.173,0.614,1.0,0.223,0.271,0.746,0.4,0.0,0.025,0.0,0.006,0.003,0.253,0.0,0.0,0.0,0.249,0.184,0.133,0.071,0.0,0.127,0.498,0.148,0.338	0.726,0.615,0.222,1.0,0.145,0.808,0.853,1.0,0.585,0.346,0.372,1.0,0.235,0.183,0.065,0.173,0.18,0.032,0.295,0.084,0.119,0.521,0.229,0.024,0.131,0.126,0.004,0.528,0.379,0.201
NM_001009987.1284_1314	.....(((((...........)).)))...	..(((((..............))..)))..	0.319,0.19,0.152,0.615,0.0,0.245,0.153,0.07,0.148,0.506,0.649,0.128,0.615,0.626,0.261,0.616,0.206,0.133,0.44,0.625,0.14,0.107,0.439,0.142,0.059,0.144,0.259,0.096,0.419,0.53	0.727,0.404,0.431,0.0,0.055,0.274,0.59,0.152,0.236,0.618,0.942,0.329,0.475,0.729,0.38,1.0,0.244,0.404,0.466,0.64,0.644,0.261,0.456,0.413,0.105,0.214,0.324,0.349,0.298,0.486
NM_001012368.2885_2915	.......(((...)))..((((....))))	........(.......).((((....))))	0.244,0.653,0.393,1.0,0.0,1.0,0.828,0.0,0.026,0.166,0.351,1.0,0.391,0.1,0.068,0.048,0.234,0.0,0.0,0.02,0.0,0.021,0.279,0.905,0.415,0.069,0.046,0.162,0.826,1.0	1.0,1.0,1.0,0.742,0.299,0.962,0.435,0.762,0.4,1.0,0.581,0.459,0.494,0.462,0.072,0.174,0.73,0.184,0.048,0.121,0.155,0.211,0.113,0.481,0.242,0.31,0.448,0.184,0.401,1.0
NM_001012490.1894_1924	.((((...)))).((((......))))...	.............((((......))))...	0.255,0.42,0.107,0.532,0.038,0.118,0.219,0.099,0.123,0.383,0.612,0.855,0.277,0.186,0.255,0.338,0.9,0.301,0.376,0.461,0.15,0.307,0.211,0.015,0.012,0.021,0.081,0.201,0.289,0.084	0.543,0.772,0.283,0.406,0.121,0.316,0.595,0.365,0.337,0.415,1.0,1.0,1.0,0.243,0.627,0.553,0.57,0.661,0.413,0.746,0.363,0.371,0.452,0.291,0.043,0.043,0.22,0.0,0.458,0.332
NM_001012500.2246_2276	(((((.....)))))...............	.((((.....))))................	0.194,0.552,0.271,0.742,0.12,0.224,0.281,0.676,0.138,0.0,0.13,0.0,0.27,0.239,1.0,0.414,0.175,0.071,0.207,0.0,0.062,0.062,0.218,0.156,0.456,0.006,0.428,0.0,0.384,0.275	1.0,0.581,0.36,0.348,0.229,0.512,0.692,0.858,0.377,0.187,0.529,0.467,0.102,0.541,1.0,0.937,0.429,0.058,0.0,0.0,0.133,0.076,0.389,0.738,0.956,0.474,0.0,0.428,0.129,0.391
NM_001013273.3376_3406	........(((((......)))))......	..((........)).(((........))).	0.324,0.389,0.159,0.698,0.161,0.266,0.259,0.241,0.214,0.317,0.571,0.342,0.163,0.329,0.244,0.216,0.104,0.788,0.279,0.175,0.163,0.192,0.041,0.017,0.485,0.457,0.342,0.27,0.28,0.624	0.436,0.694,0.335,0.587,0.466,0.252,0.407,0.189,0.182,0.443,0.682,0.528,0.374,0.297,0.308,0.279,0.187,0.557,0.164,0.217,0.205,0.276,0.03,0.139,0.353,0.833,0.364,0.247,0.275,0.497
NM_001013544.1144_1174	.((((....)).))................	..............................	0.353,0.194,0.052,0.253,0.11,0.082,0.296,0.64,0.251,0.222,0.363,0.105,0.194,0.226,0.346,0.392,0.405,1.0,0.135,0.63,0.278,0.173,0.031,0.562,0.234,0.641,0.008,0.344,0.52,0.706	0.673,0.932,0.394,0.311,0.14,0.11,0.133,0.564,0.708,0.664,0.469,0.383,0.345,0.268,0.339,0.694,0.674,1.0,0.633,0.656,0.331,0.439,0.124,0.43,0.479,0.423,0.164,0.15,0.489,0.622
NM_001014301.2028_2058	..(((.((.....)))))............	(((.......))).................	0.181,0.144,0.005,0.335,0.0,0.207,0.097,0.377,0.335,0.152,0.107,0.408,0.461,0.285,0.273,0.077,0.197,0.225,0.787,0.07,0.006,0.378,0.14,0.39,0.287,0.496,0.07,0.173,0.635,0.423	0.307,0.419,0.143,0.271,0.505,0.216,0.201,0.787,0.389,0.531,0.136,0.112,0.317,0.06,0.34,0.316,0.485,0.407,1.0,0.57,0.321,0.515,0.557,0.411,0.339,0.686,0.357,0.193,0.629,0.255
NM_001014322.1910_1940	..((.....)).(((((........)))))	..((.((.......))))............	0.123,0.175,0.099,0.0,0.068,0.047,0.459,0.316,0.19,0.05,0.288,0.484,1.0,0.363,0.082,0.654,0.12,0.341,0.509,0.315,0.095,1.0,0.324,0.898,0.455,0.109,0.183,0.799,1.0,1.0	0.259,0.484,0.142,0.0,0.02,0.104,0.479,0.553,0.724,0.177,0.418,0.491,1.0,0.944,0.239,0.826,0.214,0.345,0.47,0.48,0.248,0.845,0.282,0.754,0.658,0.389,0.462,0.824,1.0,1.0
NM_001014355.2207_2237	.....((((((..((...))....))))))	....(((((((...))))))).........	0.474,0.408,0.087,0.438,0.116,0.144,0.058,0.155,0.266,0.109,0.033,0.304,0.133,0.231,0.285,0.191,0.201,0.086,0.226,0.33,0.255,0.277,0.577,0.207,0.189,0.199,0.162,0.03,0.181,0.315	0.61,0.676,0.188,0.43,0.319,0.187,0.097,0.187,0.442,0.318,0.077,0.204,0.339,0.41,0.218,0.208,0.534,0.134,0.378,0.387,0.357,0.364,0.666,0.316,0.391,0.203,0.33,0.062,0.274,0.354
NM_001017565.647_677	......(((....((((....))))..)))	....((((......)))).((....))...	0.437,0.651,0.14,0.75,0.0,0.12,0.0,0.034,0.0,0.0,0.046,0.095,0.545,0.007,0.0,0.118,0.235,0.785,1.0,0.361,0.298,0.588,0.508,0.083,0.203,0.189,0.159,0.069,0.0,0.042	0.586,1.0,0.267,0.151,0.0,0.17,0.07,0.037,0.0,0.0,0.125,0.246,0.575,0.12,0.146,0.11,0.409,0.663,1.0,0.579,0.156,0.651,0.748,0.228,0.521,0.179,0.267,0.0,0.023,0.142
NM_001017621.1536_1566	..((....))....(((((......)))))	..............(((((......)))))	0.0,0.051,0.0,0.004,0.028,0.047,0.0,0.018,0.033,0.221,0.428,0.238,0.681,0.18,0.0,0.0,0.0,0.004,0.134,0.2,0.936,0.688,1.0,0.283,0.32,0.0,0.054,0.0,0.05,0.278	0.062,0.215,0.004,0.026,0.033,0.044,0.014,0.075,0.076,0.321,0.381,0.352,0.625,0.573,0.019,0.0,0.046,0.0,0.188,0.739,1.0,1.0,1.0,0.748,0.908,0.212,0.033,0.11,0.163,0.225
NM_001017718.3318_3348	......(((((..(((.....)))))))).	..((.....)).((((.....)))).....	0.244,0.21,0.074,0.184,0.386,1.0,0.3,0.049,0.206,0.11,0.11,0.161,0.382,0.166,0.113,0.553,0.187,0.17,0.34,0.282,0.06,0.269,0.307,0.161,0.342,0.418,0.233,0.738,0.548,0.508	0.426,0.664,0.302,0.297,0.621,1.0,0.748,0.206,0.527,0.18,0.085,0.257,0.09,0.147,0.332,0.402,0.299,0.274,0.467,0.476,0.0,0.086,0.525,0.366,0.6,0.582,0.409,0.96,0.83,0.778
NM_001017752.1791_1821	.((((.....)))).......(((...)))	.((((.....))))................	0.171,0.128,0.0,0.131,0.042,0.0,0.104,0.306,0.04,0.1,0.017,0.0,0.183,0.231,0.741,0.383,0.282,0.689,0.725,0.888,0.259,0.367,0.102,0.093,0.05,0.058,0.283,0.175,0.247,0.108	0.338,0.299,0.153,0.148,0.154,0.161,0.294,0.267,0.415,0.312,0.31,0.036,0.199,0.266,0.859,0.55,0.244,1.0,1.0,1.0,0.581,0.409,0.291,0.318,0.128,0.213,0.326,0.372,0.529,0.096
NM_001017882.1602_1632	....((((...(((((....))))).))))	......((((.(((((....))))))))).	0.165,0.139,0.0,-1,-1,-1,-1,-1,-1,-1,-1,-1,-1,-1,-1,-1,-1,-1,-1,-1,-1,-1,-1,-1,-1,-1,-1,-1,-1,-1	0.166,0.083,0.14,0.143,0.028,0.26,-1,-1,-1,-1,-1,-1,-1,-1,-1,-1,-1,-1,-1,-1,-1,-1,-1,-1,-1,-1,-1,-1,-1,-1
NM_001017896.718_748	......((((((((.....)))))..))).	.((((...))))..................	0.338,0.278,0.064,0.752,0.046,0.231,0.262,0.013,0.144,0.321,0.257,0.828,0.391,1.0,0.408,0.877,0.586,0.358,1.0,0.131,0.096,0.843,0.332,0.19,0.358,0.5,0.518,0.292,0.052,0.035	0.486,0.463,0.123,0.289,0.089,0.176,0.695,0.184,0.115,0.126,0.369,0.201,0.438,0.954,0.754,1.0,0.975,0.686,0.434,0.586,0.42,1.0,0.276,0.456,0.272,0.633,0.884,0.354,0.247,0.143
NM_001018135.3281_3311	((((..((.......)).))))........	((((..((.....))...))))........	0.406,0.105,0.159,0.42,0.202,0.369,0.025,0.067,0.007,0.324,0.26,0.238,0.123,0.049,0.025,0.03,0.0,0.377,0.076,0.099,0.0,0.032,0.096,0.298,0.02,0.116,0.159,0.31,0.495,0.549	0.752,0.592,0.309,0.202,0.414,0.54,0.233,0.058,0.305,0.225,0.308,0.192,0.104,0.052,0.086,0.136,0.171,0.329,0.042,0.0,0.174,0.108,0.327,0.186,0.08,0.249,0.008,0.434,0.681,0.794
NM_001020599.1394_1424	....((((((((.......))).)))))..	.((((((......)).))))..........	0.158,0.121,0.041,0.084,0.213,0.084,0.222,0.0,0.0,0.346,0.261,0.329,0.185,0.233,0.391,0.263,0.022,0.0,0.183,0.0,0.272,0.042,0.782,0.616,0.189,-1,-1,-1,-1,-1	0.265,0.37,0.097,0.161,0.064,0.319,0.13,0.0,0.147,0.176,0.113,0.248,0.147,0.0,0.297,0.047,0.205,0.14,0.031,0.0,0.209,0.085,0.705,0.142,0.558,0.726,0.481,0.887,0.57,0.939
NM_001020602.2083_2113	...(((........)))..(((.....)))	...(((........))).............	0.306,0.806,0.409,0.612,0.303,0.129,0.157,0.168,0.0,0.0,0.028,0.113,0.356,0.27,0.113,0.284,0.039,0.361,0.689,0.096,0.263,0.496,0.512,0.688,0.514,0.014,0.21,0.716,0.271,0.06	0.487,0.818,0.383,0.307,0.248,0.457,0.66,0.268,0.03,0.0,0.181,0.037,0.645,0.713,0.317,0.239,0.252,0.859,0.828,0.285,0.256,0.511,0.587,0.746,1.0,0.256,0.574,0.702,0.61,0.438
NM_001020623.1447_1477	..(((...............))).......	..(((.((.........)).))).......	0.398,0.309,0.109,0.11,0.148,0.219,0.82,1.0,0.211,0.693,0.961,0.277,0.577,0.488,0.491,0.335,0.395,0.473,0.362,0.18,0.122,0.224,0.324,0.143,0.417,0.892,0.288,0.082,0.435,0.225	0.547,0.536,0.26,0.183,0.251,0.364,0.487,0.841,0.486,0.758,1.0,0.316,0.53,0.717,0.565,0.438,0.606,0.257,0.157,0.021,0.213,0.005,0.21,0.174,0.27,0.523,0.44,0.202,0.038,0.086
NM_001020647.2769_2799	...((((((..((....))....)))))).	...((((((..............)))))).	0.203,0.323,0.106,0.463,0.178,0.324,0.199,0.087,0.035,0.0,0.766,0.321,0.016,0.365,0.768,0.0,0.405,0.172,0.031,0.608,0.441,0.074,0.44,0.51,0.074,0.478,0.105,0.223,0.429,0.428	0.627,0.888,0.143,0.25,0.207,0.137,0.425,0.729,0.0,0.401,0.856,0.65,0.13,0.495,0.558,0.331,0.282,0.505,0.411,0.644,0.522,0.244,0.429,0.403,0.244,0.435,0.195,0.787,0.55,1.0
NM_001020762.1852_1882	.(((((.......)))))(((.....))).	...(((.......))).((((.....))))	0.163,0.275,0.072,1.0,0.0,0.0,0.353,0.187,0.0,0.278,0.286,0.492,0.254,0.037,0.275,0.009,0.066,0.065,0.0,0.475,0.0,0.777,1.0,0.125,0.769,0.761,0.071,0.382,0.315,1.0	0.44,0.067,0.182,0.982,0.068,0.0,0.0,0.249,0.155,0.12,0.503,0.854,0.51,0.015,0.362,0.085,0.157,0.162,0.034,0.0,0.115,0.841,0.814,0.3,0.88,0.773,0.108,0.525,0.246,0.279
NM_001024207.2685_2715	(((.(((...))).))).............	..((....)).((..(((....)))..)).	0.016,0.161,0.028,0.389,0.159,0.045,0.007,0.119,0.01,0.114,0.06,0.196,0.517,0.249,0.253,0.259,0.218,0.262,0.346,0.56,0.792,1.0,0.286,0.369,0.164,0.239,1.0,0.199,0.729,0.223	0.047,0.23,0.203,0.371,0.078,0.238,0.057,0.077,0.07,0.068,0.194,0.115,0.474,0.308,0.303,0.792,0.394,0.213,0.395,0.671,0.758,1.0,0.536,0.0,0.265,0.192,0.792,0.0,0.46,0.286
NM_001024461.3618_3648	((((.......(((....)))..))))...	((((.......(((....)))..)).))..	0.164,0.566,0.129,0.095,0.072,0.474,0.06,0.283,0.245,0.622,0.248,0.506,0.055,0.605,0.321,0.491,0.2,0.155,0.001,0.004,0.065,0.027,0.0,0.102,0.123,0.493,0.066,0.468,0.0,0.0	0.703,0.911,0.468,0.08,0.104,0.766,0.142,0.409,0.264,0.585,0.254,0.746,0.437,0.426,0.454,0.03,0.354,0.234,0.0,0.048,0.331,0.034,0.001,0.156,0.049,0.317,0.167,0.0,0.041,0.0
NM_001033105.1212_1242	..........((...))(((.....)))..	...(((...................)))..	0.0,0.176,0.052,0.204,0.0,0.025,0.375,0.019,0.139,0.313,0.148,0.03,0.455,0.124,0.252,0.026,0.0,0.039,0.074,0.0,0.106,0.456,0.622,0.0,0.054,0.564,0.207,0.591,0.471,0.066	0.184,0.217,0.0,0.0,0.004,0.111,0.276,0.439,0.453,0.746,0.193,0.343,0.881,0.21,0.169,0.0,0.114,0.21,0.236,0.147,0.531,1.0,0.783,0.401,0.306,0.75,0.432,0.481,0.805,0.29
NM_001033111.2955_2985	.((((.((....))...)))).........	..(((....)))..................	0.506,0.208,0.124,0.31,0.366,0.064,0.319,0.798,0.363,0.322,0.098,0.158,0.192,0.546,0.383,0.271,0.172,0.153,0.147,0.201,0.59,0.146,0.028,0.592,0.38,0.513,0.273,0.416,0.681,1.0	0.663,0.875,0.27,0.241,0.661,0.222,0.32,0.828,0.675,0.607,0.111,0.365,0.51,0.416,0.353,0.148,0.268,0.374,0.271,0.27,0.843,0.309,0.339,0.432,0.701,0.592,0.483,0.371,0.719,1.0
NM_001034174.1331_1361	.........((((.((((...)))))))).	..((.......))..(((((.....)))))	0.0,0.247,0.019,0.025,0.063,0.277,0.418,0.693,0.233,0.038,0.143,0.193,0.173,0.107,0.089,0.091,0.0,0.092,0.094,0.063,0.021,0.363,0.0,0.023,0.117,0.14,0.065,0.057,0.198,0.0	0.385,0.596,0.465,0.093,0.187,0.108,0.348,0.601,0.883,0.512,0.501,0.501,0.194,0.447,0.092,0.196,0.133,0.182,0.398,0.364,0.122,0.862,0.225,0.223,0.205,0.0,0.023,0.293,0.588,0.303
NM_001034977.2731_2761	((((....))))((((....)).)).....	..............................	-1,-1,-1,-1,-1,-1,0.0,0.0,0.417,0.209,0.631,0.089,0.134,1.0,0.291,0.449,0.045,0.02,0.021,0.311,0.515,0.0,0.264,0.314,0.604,0.18,0.068,0.09,1.0,0.891	1.0,0.646,0.673,0.669,0.264,0.112,0.134,0.161,0.56,0.489,1.0,0.851,0.245,0.967,0.952,0.482,0.209,0.186,0.165,0.384,0.669,0.048,0.209,0.539,0.559,0.703,0.165,0.392,0.652,0.56
NM_001034982.2808_2838	.....((....(((((...)))))..))..	.......(((......)))...........	0.108,0.517,0.09,0.732,0.112,0.0,0.233,0.11,0.108,0.343,0.462,0.21,0.44,0.018,0.001,0.0,0.736,0.58,0.368,0.562,0.512,0.24,0.333,0.346,0.427,0.542,0.103,0.154,0.121,0.402	0.773,0.928,0.207,0.77,0.161,0.272,0.302,0.14,0.078,0.634,0.43,0.508,0.416,0.146,0.443,0.238,0.643,0.22,0.12,0.637,0.874,0.292,0.223,0.127,0.723,0.652,0.755,0.363,0.364,0.344
NM_001037106.954_984	..((....................))....	..............................	0.381,0.288,0.147,0.343,0.537,0.236,1.0,0.408,1.0,1.0,0.0,0.216,0.046,0.521,0.0,0.392,0.25,0.409,0.077,0.893,0.38,0.213,0.119,0.416,0.013,0.226,0.368,0.045,0.0,0.0	0.733,0.665,0.396,0.376,1.0,0.187,0.956,0.672,0.901,1.0,0.36,0.0,0.029,0.339,0.0,0.0,0.124,0.1,0.07,0.349,0.449,0.69,0.255,0.423,0.08,0.3,0.482,0.173,0.186,0.067
NM_001037419.1641_1671	.........(((..(((.....))).))).	(((.....))).((......))........	0.319,0.124,0.0,0.513,0.0,0.212,0.008,0.245,0.296,0.453,0.178,0.26,0.076,0.287,0.486,0.022,0.107,0.097,0.186,0.0,0.352,0.188,-1,-1,-1,-1,-1,-1,-1,-1	0.485,0.412,0.041,0.225,0.041,0.149,0.326,0.405,0.0,0.209,0.074,0.283,0.184,0.801,0.478,0.018,0.223,0.394,0.286,0.238,0.0,0.393,0.105,0.309,0.263,0.845,0.315,1.0,0.497,0.3
NM_001039513.754_784	.(((.(((.....))))))...........	..(((((.((.....)).)).....)))..	0.473,0.716,0.0,0.329,0.075,0.313,0.469,0.088,0.0,0.347,0.528,0.384,1.0,0.532,0.0,0.0,0.236,0.057,0.04,0.018,0.19,0.297,0.396,0.835,0.192,0.279,0.133,0.216,0.1,0.321	1.0,1.0,0.23,0.073,0.024,0.29,0.426,0.088,0.0,0.3,0.705,0.31,1.0,0.787,0.29,0.256,0.128,0.128,0.207,0.408,0.681,0.592,0.876,1.0,0.786,0.38,0.0,0.0,0.151,0.0
NM_001039971.1981_2011	(((((((.((.........)).))))))).	..(((((.((.........)).)))))...	0.37,0.312,0.079,0.258,0.288,0.179,0.287,0.739,0.224,0.184,0.096,0.077,0.551,0.322,0.333,0.485,0.494,0.135,0.39,0.668,0.076,0.219,0.168,0.125,0.068,0.21,0.187,0.245,0.149,0.417	0.841,0.861,0.594,0.248,0.464,0.225,0.15,0.706,0.535,0.632,0.286,0.134,0.582,0.471,0.233,0.412,0.457,0.307,0.126,0.586,0.297,0.512,0.316,0.191,0.329,0.337,0.0,0.849,0.306,0.098
NM_001040094.1775_1805	((((.((((((....)).)))).))))...	.(((.((((((....)).)))).)))....	0.427,0.265,0.031,0.267,0.0,0.096,0.185,0.088,0.144,0.092,0.043,0.13,0.07,0.057,0.151,0.198,0.486,0.883,0.295,0.302,0.029,0.003,0.114,0.353,0.298,0.531,0.285,0.512,0.338,1.0	0.817,0.786,0.012,0.274,0.018,0.115,0.381,0.149,0.368,0.33,0.098,0.232,0.066,0.0,0.136,0.2,0.495,0.569,0.205,0.591,0.07,0.007,0.285,0.477,0.169,0.82,0.542,0.693,0.393,1.0
NM_001040348.2141_2171	.(((...................)))....	.(((......((....)).....)))....	0.087,0.049,0.0,0.021,0.044,0.009,0.385,0.342,0.488,0.255,0.051,0.544,0.842,0.107,0.259,0.565,0.291,0.742,0.924,0.345,0.407,0.058,0.029,0.0,0.19,0.0,0.145,1.0,0.598,0.679	0.011,0.027,0.015,0.0,0.023,0.147,0.255,0.182,0.416,0.136,0.0,0.384,0.318,0.141,0.2,0.043,0.265,0.438,1.0,0.834,0.841,0.387,0.172,0.0,0.145,0.028,0.121,0.654,0.522,0.781
NM_001040375.836_866	.((..((((((........)).)))).)).	..............((((.....))))...	0.213,0.099,0.039,0.419,0.393,0.529,0.548,0.415,0.919,0.681,0.148,0.788,0.27,0.596,0.216,0.289,0.214,0.139,0.275,0.362,1.0,0.485,0.592,0.263,0.172,0.569,0.227,0.139,0.121,0.4	0.269,0.329,0.223,0.285,0.839,0.383,1.0,0.756,0.928,1.0,0.379,1.0,0.454,0.818,0.391,0.422,0.27,0.459,0.517,0.512,0.952,0.421,0.229,0.568,0.436,0.432,0.247,0.33,0.335,0.513
NM_001044313.2927_2957	..(((....)))..................	........((((........))))......	0.392,0.393,0.051,0.201,0.209,0.16,0.914,0.595,0.22,0.296,0.044,0.341,0.348,0.254,0.347,0.276,0.766,0.495,0.227,0.37,0.097,0.127,1.0,0.257,0.351,0.587,0.609,0.357,0.429,0.979	0.819,1.0,0.318,0.258,0.827,0.244,1.0,1.0,0.757,0.643,0.277,0.184,0.455,0.246,0.509,0.471,0.206,0.221,0.443,0.391,0.229,0.257,0.478,0.366,0.368,0.749,0.387,0.278,0.461,0.319
NM_001044316.2104_2134	...((.(((((..........)).))))).	..((......))..................	0.085,0.013,0.056,0.0,0.0,0.0,0.0,0.0,0.0,0.0,0.0,0.0,0.0,0.0,0.041,0.0,0.17,0.661,-1,-1,-1,-1,-1,-1,-1,-1,0.411,0.262,1.0,1.0	0.0,0.07,0.0,0.05,0.0,0.0,0.0,0.0,0.0,0.018,0.0,0.0,0.0,0.0,0.0,0.324,0.275,0.198,0.0,0.0,0.269,0.381,0.51,0.488,0.349,0.0,0.89,0.673,0.996,0.723
NM_001044799.2496_2526	....((((((((......))))))))....	...((((.((....))))))..........	0.183,0.432,0.0,0.179,0.044,0.0,0.315,0.219,0.041,0.064,0.0,0.0,0.0,0.0,0.151,0.062,0.019,0.086,0.021,0.0,0.153,0.357,0.088,0.0,0.387,0.318,1.0,0.22,0.706,1.0	0.092,0.106,0.225,0.287,0.091,0.062,0.423,0.262,0.076,0.285,0.166,0.123,0.031,0.063,0.0,0.337,0.217,0.176,0.161,0.03,0.312,0.054,0.441,0.1,0.525,0.895,0.774,0.739,1.0,1.0
NM_001044970.3544_3574	((......((((.......))))...))..	........((((.......)))).......	0.153,0.243,0.035,0.334,0.111,0.203,0.584,0.256,0.165,0.405,0.114,0.186,0.032,0.266,0.132,0.529,0.096,0.137,0.165,0.189,0.156,0.107,0.263,0.129,0.38,0.415,0.105,0.256,0.346,0.172	0.136,0.538,0.218,0.048,0.013,0.339,0.532,0.616,0.6,0.438,0.224,0.121,0.074,0.22,0.111,0.201,0.186,0.182,0.244,0.03,0.29,0.155,0.242,0.232,0.289,0.228,0.047,0.3,0.389,0.219
NM_001044988.1712_1742	.....((..............)).......	..............................	0.484,0.284,0.125,0.237,0.147,0.086,0.184,0.167,0.345,0.049,0.614,0.479,0.25,0.55,0.445,0.774,0.849,0.863,1.0,0.18,0.071,0.299,0.209,0.422,0.184,0.783,1.0,0.511,0.142,0.438	0.494,0.743,0.217,0.425,0.277,0.489,0.44,0.468,0.47,0.524,0.0,0.047,0.748,0.485,1.0,0.99,1.0,0.732,1.0,0.886,0.216,0.324,0.252,0.387,0.517,0.642,1.0,0.562,0.504,0.566
NM_001045000.1343_1373	((((......)))).((.....))......	((((......))).)...............	0.269,0.388,0.154,0.413,0.021,0.103,0.599,0.203,0.049,0.205,0.099,0.118,0.611,0.447,0.726,0.23,0.106,0.401,0.68,0.159,0.014,0.324,0.409,0.137,0.41,0.0,0.016,0.17,0.849,0.271	0.717,0.954,0.283,0.445,0.483,0.73,1.0,0.614,0.358,0.42,0.358,0.187,0.754,0.468,0.391,0.195,0.087,0.662,0.732,0.61,0.142,0.204,0.528,0.201,0.522,0.413,0.136,0.335,1.0,0.593
NM_001045142.2234_2264	.(((...).)).(((((........)))))	.(((...)).).(((((........)))))	0.187,0.19,0.089,0.763,0.061,0.231,0.144,0.043,0.099,0.104,0.02,0.674,0.163,0.0,0.11,0.0,0.147,0.054,0.841,0.574,0.657,0.499,1.0,0.746,0.706,0.129,0.062,0.145,0.0,0.133	0.433,0.826,0.239,0.649,0.084,0.366,0.355,0.1,0.189,0.22,0.269,0.731,0.253,0.218,0.022,0.155,0.034,0.168,0.555,0.594,0.372,0.828,1.0,0.72,1.0,0.156,0.3,0.073,0.109,0.088
NM_001045142.2980_3010	..((((...)))).((..........))..	..............................	0.412,0.419,0.227,0.555,0.157,0.283,0.196,0.477,0.314,0.193,0.213,0.115,0.523,0.31,0.011,0.352,0.241,0.983,0.01,0.056,0.337,0.017,0.793,0.67,0.602,0.598,0.062,0.099,0.388,0.81	1.0,0.64,0.561,0.346,0.778,0.715,0.343,0.665,1.0,0.278,0.921,0.176,0.673,0.852,0.433,0.376,0.285,0.783,0.417,0.171,0.068,0.232,0.524,0.74,0.568,1.0,0.697,0.104,0.585,0.556
NM_001045258.1822_1852	.............((((.........))))	..............................	0.246,0.301,0.167,0.151,0.124,0.0,0.129,0.229,0.463,0.71,0.041,0.225,0.287,0.509,0.286,0.129,0.776,0.632,0.575,0.877,0.46,0.185,0.391,0.187,0.178,0.107,0.399,0.274,0.143,0.21	0.702,0.616,0.253,0.175,0.026,0.128,0.156,0.304,0.306,0.355,0.396,0.335,0.299,0.715,0.507,0.404,0.867,0.627,0.45,0.612,0.474,0.789,0.667,0.224,0.203,0.009,0.321,0.241,0.278,0.354
NM_001076652.2702_2732	((.((((.....)))).))...........	.(((....))).(((((........)))))	0.241,0.277,0.122,0.379,0.065,0.136,0.216,0.159,0.226,0.071,0.079,0.151,0.288,0.09,0.084,0.438,0.173,0.173,0.146,0.126,0.068,0.102,0.32,0.24,0.151,0.158,0.322,0.275,0.3,0.377	0.249,0.403,0.181,0.074,0.132,0.133,0.235,0.196,0.187,0.117,0.0,0.206,0.297,0.101,0.166,0.22,0.221,0.166,0.084,0.039,0.0,0.1,0.104,0.17,0.14,0.193,0.04,0.276,0.067,0.443
NM_001076743.1523_1553	.(((......)))....(((....)))...	.................(((....)))...	0.095,0.44,0.179,0.047,0.0,0.064,0.0,0.031,0.147,0.231,0.261,0.977,0.16,0.901,1.0,0.043,0.0,0.063,0.2,0.303,0.281,0.528,0.293,0.294,0.303,0.194,0.592,0.404,0.21,0.587	0.206,0.868,0.182,0.033,0.036,0.0,0.55,0.45,0.08,0.805,0.326,0.88,0.09,0.55,0.582,0.008,0.086,0.22,0.155,0.125,0.718,0.327,0.514,0.171,0.085,0.318,0.514,0.357,0.152,0.399
NM_001076750.1276_1306	..(((.............))).........	.........((((.((...)))))).....	0.292,0.219,0.046,0.16,0.006,0.068,0.294,0.142,0.642,0.441,0.447,0.381,0.025,0.053,0.0,0.0,0.042,0.0,0.0,0.14,0.18,0.34,0.176,0.333,0.583,0.0,0.457,0.601,0.253,0.321	0.329,0.265,0.022,0.0,0.096,0.0,0.126,0.0,0.322,0.0,0.123,0.023,0.018,0.009,0.0,0.0,0.0,0.048,0.004,0.0,0.0,0.089,0.158,0.155,0.274,0.0,0.0,0.236,0.107,0.192
NM_001077247.1533_1563	..........((.((((....))))))...	..........(((.(((....))))))...	0.985,0.504,0.11,0.861,0.264,0.41,1.0,0.618,0.298,0.139,0.433,0.004,0.365,0.051,0.218,0.11,0.168,0.038,0.183,0.329,0.157,0.103,0.06,0.473,0.4,0.399,0.119,0.082,0.161,0.113	1.0,0.889,0.647,0.424,0.643,0.548,0.718,1.0,0.8,0.347,0.68,0.164,0.548,0.343,0.433,0.096,0.271,0.421,0.576,0.206,0.221,0.313,0.171,0.567,1.0,0.376,0.258,0.156,0.227,0.26
NM_001077329.1209_1239	........((.(((((....))))).))..	...........(((((....))))).....	0.482,0.309,0.03,0.361,0.0,0.182,0.255,0.69,0.274,0.063,0.052,0.201,0.409,0.22,0.031,0.021,0.0,0.115,0.042,0.021,0.0,0.026,0.082,0.277,0.48,1.0,0.904,1.0,1.0,0.096	0.634,0.591,0.179,0.207,0.174,0.476,0.301,0.7,0.251,0.251,0.196,0.37,0.626,0.383,0.078,0.0,0.089,0.176,0.07,0.0,0.016,0.022,0.0,0.171,0.635,1.0,1.0,1.0,1.0,0.353
NM_001077329.989_1019	.....(((.((.......)).)))......	........(((.((.....)))))......	0.039,0.264,0.14,0.36,0.079,0.059,0.039,0.0,0.0,0.153,0.115,0.311,1.0,1.0,0.663,1.0,1.0,0.072,0.149,0.242,0.186,0.039,0.0,0.02,0.548,0.102,0.021,0.203,0.042,0.0	0.029,0.521,0.274,0.255,0.199,0.175,0.452,0.471,0.202,0.099,0.281,0.565,1.0,0.842,0.702,0.923,1.0,0.612,0.301,0.228,0.182,0.077,0.091,0.296,0.416,0.574,0.061,0.164,0.0,0.19
NM_001077341.2506_2536	..((.........))...............	..............................	0.0,0.109,0.01,0.373,0.176,0.66,0.616,0.446,0.913,0.76,0.23,0.389,0.258,0.118,0.38,0.601,0.125,0.122,0.117,0.239,0.278,0.054,0.157,0.448,0.478,0.887,0.745,1.0,0.364,0.384	0.225,0.242,0.166,0.375,0.488,0.18,0.6,0.715,0.684,1.0,0.648,0.612,0.548,0.313,0.392,0.475,0.065,0.075,0.198,0.311,0.508,0.293,0.225,0.433,0.444,1.0,0.733,0.956,0.578,0.336
NM_001077608.1965_1995	..(((.................))).....	..............................	0.246,0.331,0.165,0.0,0.254,0.285,0.901,0.13,0.533,0.683,0.612,0.142,0.668,1.0,0.248,0.498,0.287,0.356,0.538,0.0,0.375,0.289,0.369,0.257,0.065,0.256,0.319,0.252,0.376,0.463	0.718,0.822,0.568,0.312,0.475,0.107,0.285,0.138,0.364,0.751,0.956,0.203,0.393,0.543,0.384,0.149,0.681,0.726,0.302,0.213,0.399,0.645,0.49,0.364,0.074,0.15,0.276,0.707,0.352,0.375
NM_001077719.2093_2123	..........(((((((.....))))))).	....((..(((((....)))))..))....	0.461,0.427,0.089,0.537,0.091,0.104,0.02,0.004,0.107,0.23,0.114,0.075,0.305,0.472,0.17,0.109,0.433,0.358,0.803,0.328,0.291,0.287,0.175,0.569,0.141,0.503,0.485,0.343,1.0,0.622	0.722,0.666,0.179,0.59,0.047,0.188,0.197,0.0,0.154,0.322,0.0,0.168,0.329,0.31,0.301,0.195,0.28,0.271,0.752,0.118,0.465,0.257,0.233,0.661,0.28,0.438,0.804,0.363,1.0,0.436
NM_001077738.1720_1750	......((((........).))).......	......((((........)).)).......	0.281,0.553,0.206,0.622,0.199,0.205,0.162,0.322,0.08,0.464,1.0,1.0,0.654,0.561,0.832,1.0,0.594,0.3,0.043,0.089,0.144,0.0,0.072,0.713,0.673,0.296,0.122,0.084,0.571,0.48	0.639,0.772,0.428,0.521,0.279,0.268,0.379,0.425,0.06,0.218,0.902,1.0,0.589,0.542,0.935,1.0,1.0,0.681,0.092,0.282,0.208,0.095,0.14,0.856,0.768,0.286,0.052,0.159,0.868,1.0
NM_001077795.1614_1644	(((..........)))((((......))))	(((.((.((.....)).)))))........	0.286,0.295,0.012,0.195,0.158,0.025,0.147,0.314,0.145,0.13,0.101,0.476,0.234,0.152,0.06,0.153,0.261,0.288,0.043,0.273,0.246,0.0,0.034,0.208,0.109,0.151,0.596,0.54,0.35,0.026	0.125,0.464,0.146,0.051,0.614,0.08,0.223,0.383,0.486,0.171,0.249,0.775,0.337,0.123,0.33,0.094,0.56,0.327,0.112,0.791,0.247,0.0,0.239,0.0,0.614,0.59,0.803,0.893,0.497,0.239
NM_001079951.7532_7562	(((((..((.......)))).)))......	(((((..((.......))))).))......	0.142,0.0,0.194,0.14,0.0,0.156,0.194,0.0,0.679,0.529,1.0,0.122,0.155,0.345,0.084,0.257,0.0,0.145,0.212,0.127,0.188,0.341,0.075,0.0,0.0,0.843,0.0,0.615,0.082,0.013	0.047,0.189,0.121,0.079,0.014,0.216,0.034,0.032,1.0,0.6,1.0,0.283,0.309,0.492,0.477,0.156,0.23,0.541,0.254,0.046,0.499,0.714,0.148,0.176,0.029,0.314,0.146,0.393,0.285,0.498
NM_001079975.1617_1647	..............................	....(((((..............)))))..	1.0,0.781,0.371,1.0,0.429,0.809,0.561,0.48,0.959,0.09,0.419,0.737,0.23,0.826,0.268,0.243,0.286,0.332,1.0,0.365,0.307,0.521,0.636,0.702,0.605,0.644,0.792,0.423,0.185,0.25	0.89,1.0,0.846,0.979,0.07,0.495,0.113,0.465,0.433,0.142,0.39,0.643,0.079,0.612,0.561,0.329,0.452,0.15,0.705,0.305,0.392,0.675,0.544,0.225,0.774,0.331,0.252,0.206,0.149,0.222
NM_001080033.472_502	....(((..........)))..........	(((.....)))...................	0.209,0.361,0.162,1.0,0.1,0.074,0.118,0.136,0.329,0.0,0.133,0.22,0.089,0.563,1.0,0.138,0.0,0.139,0.0,0.0,0.0,0.405,0.438,0.529,0.0,0.353,0.282,0.29,0.273,0.052	0.502,0.804,0.504,0.717,1.0,0.43,0.25,0.12,0.0,0.131,0.14,0.027,0.018,0.584,0.829,0.249,0.076,0.238,0.081,0.0,0.016,0.215,0.534,0.369,0.055,0.959,0.737,0.455,0.373,0.118
NM_001080167.4128_4158	.....(((....)))((.(((....)))))	.....(((....)))(((.((....)))))	0.045,0.254,0.103,0.243,0.155,0.206,0.07,0.356,0.231,0.335,0.158,0.339,0.38,0.41,0.284,0.205,0.844,0.914,0.513,0.249,0.0,0.313,0.742,0.0,0.037,0.018,0.165,0.083,0.02,0.083	0.536,0.585,0.352,0.0,0.101,0.058,0.177,0.22,0.389,0.481,0.11,0.327,0.415,0.505,0.303,0.531,0.581,0.665,0.924,0.533,0.016,0.64,0.575,0.52,0.119,0.024,0.0,0.097,0.0,0.187
NM_001082481.3552_3582	...((((...))))....((......))..	...((((...)))).((.........))..	0.0,0.143,0.027,0.257,0.154,0.066,0.084,1.0,0.773,0.145,0.144,0.0,0.052,0.0,0.061,0.0,0.022,0.056,0.023,0.0,0.066,0.059,0.059,0.359,0.35,0.371,0.055,0.058,0.075,0.012	0.133,0.342,0.048,0.376,0.335,0.097,0.091,0.978,0.774,0.685,0.096,0.069,0.112,0.226,0.0,0.024,0.003,0.092,0.09,0.045,0.068,0.028,0.295,0.423,0.463,0.326,0.446,0.214,0.178,0.131
NM_001082551.4752_4782	.....((...((((......))))..))..	..((......((((......))))...)).	0.295,0.368,0.124,0.342,0.054,0.069,0.335,0.352,1.0,0.051,0.0,0.0,0.0,0.057,0.0,0.02,0.064,0.575,0.599,0.156,0.078,0.028,0.019,0.027,0.134,0.444,0.41,0.031,0.164,0.429	0.371,0.698,0.227,0.3,0.226,0.119,0.451,0.434,1.0,0.181,0.0,0.046,0.0,0.103,0.0,0.049,0.145,0.199,0.252,0.161,0.078,0.102,0.024,0.113,0.171,0.724,0.625,0.068,0.163,0.553
NM_001082836.2823_2853	((.((..(((((.......))))).)).))	.....((....)).(((..........)))	0.076,0.571,0.0,0.895,0.05,0.437,0.003,0.072,0.207,0.284,0.119,0.072,0.027,0.05,0.831,0.099,0.0,0.0,0.564,0.465,0.375,0.362,0.545,0.487,0.109,0.0,0.08,0.058,-1,0.141	0.416,1.0,0.422,0.419,0.0,0.452,0.249,0.23,0.556,0.798,0.787,0.332,0.263,0.094,0.418,0.315,0.134,0.195,0.569,0.729,0.473,0.249,0.534,0.796,0.46,0.135,0.14,0.296,0.27,0.092
NM_001083002.1904_1934	..............................	.......((((............))))...	0.151,0.325,0.23,0.561,0.277,0.027,0.267,1.0,0.139,0.159,0.227,0.041,0.106,0.023,0.082,0.234,0.109,0.201,0.151,0.404,0.097,0.0,0.096,0.215,0.09,0.505,1.0,0.562,0.374,0.666	0.152,0.47,0.372,0.379,0.55,0.296,0.263,0.424,0.339,0.22,0.217,0.211,0.19,0.107,0.156,0.0,0.039,0.069,0.617,0.404,0.099,0.116,0.081,0.166,0.035,0.409,0.808,0.833,0.425,0.486
NM_001083552.513_543	......(((...)))(((.......)))..	(((...)))......(((.......)))..	0.115,0.0,0.239,0.274,0.054,0.057,0.339,0.135,0.0,0.038,0.222,0.124,0.291,0.039,0.039,0.0,0.063,0.0,0.036,0.733,0.509,1.0,0.847,0.402,0.2,0.231,0.068,0.0,0.09,0.598	0.121,0.0,0.142,0.324,0.308,0.375,0.074,0.044,0.031,0.205,0.255,0.224,0.375,0.2,0.117,0.187,0.0,0.0,0.159,0.784,0.888,0.767,0.501,0.804,0.678,0.276,0.293,0.015,0.222,-1
NM_001089356.2325_2355	..(((....)))..(((.........))).	..(((....)))....(((.......))).	0.294,0.205,0.128,0.131,0.049,0.164,0.0,0.0,0.0,0.089,0.269,0.34,0.774,0.613,0.084,0.138,0.036,0.175,0.379,0.213,0.408,0.344,0.651,1.0,0.547,0.287,0.32,0.402,0.439,0.756	0.388,0.72,0.209,0.155,0.288,0.07,0.094,0.128,0.078,0.175,0.466,0.418,0.646,0.62,0.221,0.039,0.104,0.0,0.389,0.034,0.856,0.549,0.785,1.0,0.928,0.379,0.414,0.268,0.299,0.931
NM_001098177.6371_6401	(((...))).((........))........	..((......))..................	0.232,0.109,0.0,0.222,0.178,0.169,0.456,0.189,0.096,0.12,0.101,0.212,0.094,0.075,0.159,0.634,0.304,0.72,0.37,0.1,0.029,0.354,0.166,0.046,0.391,0.923,0.007,0.083,0.094,0.125	0.541,0.421,0.181,0.271,0.725,0.234,0.601,0.332,0.296,0.401,0.341,0.427,0.54,0.342,0.286,0.596,0.319,1.0,0.606,0.808,0.127,0.818,0.026,0.172,0.192,0.925,0.41,0.246,0.656,0.397
NM_001098177.6379_6409	.(((((((..(((...)))..)))).))).	.(((((((.............)))).))).	0.096,0.12,0.101,0.212,0.094,0.075,0.159,0.634,0.304,0.72,0.37,0.1,0.029,0.354,0.166,0.046,0.391,0.923,0.007,0.083,0.094,0.125,0.063,0.171,0.344,0.406,0.165,0.214,0.537,0.161	0.296,0.401,0.341,0.427,0.54,0.342,0.286,0.596,0.319,1.0,0.606,0.808,0.127,0.818,0.026,0.172,0.192,0.925,0.41,0.246,0.656,0.397,0.635,0.394,0.613,1.0,0.566,0.0,1.0,0.515
NM_001099448.3451_3481	.............((((....)))).....	..............................	0.196,0.419,0.506,0.833,0.145,0.093,0.039,0.175,0.602,0.428,0.037,0.801,0.468,0.293,0.175,0.683,0.073,0.107,0.136,0.356,0.088,0.739,0.135,0.134,0.064,0.237,0.585,0.95,0.165,0.0	-1,-1,-1,-1,-1,-1,-1,-1,-1,-1,0.823,0.989,1.0,0.751,0.804,0.95,0.85,0.73,0.541,0.49,0.147,0.479,0.752,0.365,0.301,0.167,1.0,0.845,0.32,0.297
NM_001100028.4477_4507	.......((((..((((....)))).))))	.......((((...............))))	0.351,0.118,0.036,0.299,0.028,0.091,0.289,0.0,0.039,0.153,0.12,0.488,0.432,0.226,0.064,0.101,0.29,0.708,0.118,0.341,0.69,1.0,0.427,0.488,0.52,0.236,0.39,0.066,0.127,0.211	0.541,0.456,0.265,0.227,0.309,0.416,0.271,0.321,0.212,0.277,0.151,0.418,0.234,0.634,0.137,0.225,0.551,0.797,0.728,0.218,0.598,0.967,0.68,0.54,0.848,0.429,0.659,0.267,0.049,0.172
NM_001105132.2428_2458	((((.(((..((....))..))))).))..	..((.(((..((....))..))))).....	0.375,0.976,0.005,0.005,0.086,0.124,0.122,0.498,0.332,0.108,0.057,0.042,0.121,0.106,0.052,0.021,0.005,0.058,0.111,0.136,0.008,0.021,0.0,0.218,0.7,0.358,0.054,0.138,0.159,0.391	0.572,1.0,0.034,0.071,0.003,0.22,0.16,0.214,0.515,0.431,0.287,0.205,0.002,0.035,0.085,0.188,0.293,0.069,0.0,0.164,0.264,0.1,0.037,0.209,0.202,0.316,0.262,0.261,0.269,0.311
NM_001110022.2480_2510	(((....))).......(((....)))...	((((..(((.....)))..)))).......	0.034,0.015,0.0,0.084,0.0,0.0,0.094,0.063,0.097,0.036,0.465,0.126,0.298,0.375,0.366,1.0,0.09,0.044,0.334,0.326,0.169,0.347,1.0,0.739,0.129,0.136,0.515,0.168,0.449,0.35	0.039,0.073,0.03,0.0,0.0,0.122,0.131,0.0,0.291,0.04,0.147,0.308,0.467,0.953,0.491,1.0,0.127,0.1,0.379,0.385,0.188,0.192,1.0,0.99,0.308,0.154,0.29,0.33,0.251,0.407
NM_001113576.1691_1721	.....(((......)))...(((....)))	.....(((......))).............	0.101,0.344,0.301,0.192,0.412,0.151,0.022,0.956,0.037,0.263,0.052,0.0,0.212,0.018,0.136,0.09,0.221,0.211,0.253,0.143,0.478,0.092,0.529,0.608,0.224,0.104,0.232,0.11,0.067,0.116	0.163,0.446,0.35,0.512,1.0,0.368,0.304,0.565,0.236,0.418,0.192,0.201,0.025,0.0,0.305,0.194,0.332,0.331,0.31,0.274,0.897,0.167,0.849,1.0,0.696,0.06,0.02,0.226,0.183,0.099
NM_001114429.2787_2817	(((....)))(((.......))).......	..((...........)).............	0.02,0.027,0.094,0.42,0.307,0.198,0.095,0.391,0.108,0.102,0.296,0.041,0.083,0.0,0.202,0.173,0.43,0.369,0.131,0.332,0.201,0.867,0.198,0.591,0.527,0.346,0.138,0.57,0.521,0.378	0.218,0.288,0.219,0.236,0.43,0.5,0.308,0.446,0.311,0.401,0.289,0.154,0.331,0.026,0.444,0.032,0.248,0.34,0.42,0.545,0.248,0.661,0.768,0.756,0.358,0.419,0.232,0.424,0.415,0.292
NM_001114723.1346_1376	.....((((((..........))))))...	..............................	0.042,0.131,0.0,0.263,0.0,0.116,0.119,0.0,0.3,0.45,0.141,0.897,0.337,0.398,0.0,0.722,0.389,0.553,0.05,0.435,0.778,0.463,0.231,0.767,0.327,0.51,0.008,0.282,0.022,0.168	0.208,0.341,0.341,0.302,0.23,0.321,0.469,0.183,0.587,0.815,0.195,0.875,0.893,1.0,0.506,0.973,0.624,0.451,0.563,0.687,1.0,1.0,0.638,1.0,1.0,0.851,0.364,0.693,0.087,0.575
NM_001115140.2050_2080	..(((.((...((........)).)).)))	..(((.((................)).)))	0.158,0.112,0.087,0.351,0.101,0.001,0.276,0.145,0.449,0.715,0.28,0.474,0.552,1.0,0.769,0.804,0.625,1.0,0.625,0.259,0.068,0.276,0.138,0.076,0.082,0.637,0.107,0.045,0.013,0.017	0.141,0.518,0.267,0.254,0.264,0.124,0.401,0.178,0.531,0.758,0.672,0.92,0.801,1.0,1.0,0.981,0.701,1.0,0.7,0.661,0.119,0.249,0.232,0.204,0.219,0.667,0.134,0.014,0.009,0.007
NM_001122747.3109_3139	((((((.........))).)))........	((((((.........))).)).).......	0.555,0.421,0.115,0.365,0.063,0.568,0.151,0.4,0.214,0.106,0.934,0.0,0.063,0.049,0.07,0.016,0.02,0.109,0.037,0.095,0.554,0.317,0.571,0.684,0.256,1.0,0.858,0.082,0.47,0.011	0.733,0.797,0.433,0.059,0.018,0.493,0.31,0.329,0.361,0.49,0.477,0.058,0.0,0.149,0.04,0.042,0.051,0.085,0.143,0.137,0.133,0.499,0.6,1.0,0.612,1.0,0.8,0.0,0.636,0.144
NM_001122749.3575_3605	.(((((.(((((.....)))))))..))).	..((((....))))................	0.146,0.056,0.048,0.374,0.014,0.341,0.301,0.293,0.308,0.114,0.174,0.264,0.399,0.402,0.377,0.073,0.051,0.229,0.301,0.128,0.043,0.176,0.264,0.21,0.036,0.503,0.657,0.657,0.25,0.05	0.191,0.278,0.238,0.163,0.065,0.214,0.53,0.672,0.45,0.201,0.501,0.333,0.556,1.0,0.473,0.091,0.066,0.322,0.491,0.555,0.169,0.41,0.358,0.373,0.415,0.646,1.0,0.671,0.816,0.295
NM_001122844.3685_3715	((((....)))).((((....)))).....	(((((.......))))).............	0.135,0.554,0.239,0.61,0.113,0.092,0.0,0.423,0.196,0.056,0.072,0.278,0.387,0.088,0.109,0.245,0.344,0.102,0.208,0.171,0.187,0.253,0.786,0.307,0.51,0.581,0.494,0.84,0.976,0.228	0.345,0.612,0.331,0.171,0.434,0.059,0.368,0.58,0.344,0.17,0.049,0.71,0.752,0.251,0.064,0.437,0.653,0.136,0.377,0.398,0.518,0.389,1.0,0.692,0.664,0.562,0.524,0.758,1.0,0.593
NM_001123056.2557_2587	.................((((....)))).	..(((..((......)).))).........	0.611,0.813,0.043,0.093,0.13,0.061,0.0,0.182,0.202,0.414,0.385,0.853,0.331,0.899,0.608,0.0,0.329,0.302,0.112,0.068,0.099,0.057,0.197,0.342,0.433,0.046,0.14,0.085,0.068,0.313	1.0,1.0,0.144,0.0,0.0,0.117,0.153,0.131,0.645,0.363,0.759,0.659,0.577,0.465,0.53,0.101,0.586,0.432,0.494,0.262,0.066,0.341,0.467,0.553,0.763,0.085,0.178,0.443,0.339,0.457
NM_001123056.3332_3362	...................(((.....)))	..((.(((((......)))))...))....	0.398,0.62,0.39,0.731,0.089,0.372,1.0,0.961,0.139,1.0,0.52,0.101,0.945,0.739,0.634,0.385,0.506,0.342,0.031,0.352,0.0,0.559,0.547,0.093,0.571,0.147,0.433,0.021,0.161,0.128	-1,-1,-1,-1,-1,-1,-1,-1,-1,1.0,0.847,0.567,1.0,0.87,0.767,0.637,0.597,0.445,0.403,0.164,0.158,0.257,0.254,0.213,0.737,0.233,0.517,0.253,0.094,0.176
NM_001128238.2161_2191	.((....)).(((..((((...)))).)))	.((....)).(((((.........)).)))	0.245,0.328,0.142,0.166,0.0,0.0,0.0,0.0,0.0,0.0,0.009,0.008,0.009,0.074,0.039,0.576,0.336,0.328,0.314,0.288,0.413,0.482,0.561,0.19,0.108,0.591,0.277,0.009,0.029,0.11	0.696,0.451,0.186,0.17,0.153,0.171,0.0,0.009,0.067,0.048,0.017,0.083,0.057,0.0,0.101,0.426,0.623,0.608,0.348,0.986,0.768,0.697,0.867,0.639,0.416,0.944,0.317,0.264,0.038,0.213
NM_001128351.2629_2659	((((....))))..................	(((...(((.......)))..)))......	0.619,0.31,0.148,0.646,0.26,0.098,0.076,0.076,0.027,0.126,0.067,0.14,0.142,0.558,0.975,0.511,0.108,0.098,0.48,0.631,0.067,0.08,0.264,0.255,0.31,0.682,0.327,0.583,0.057,0.131	0.745,0.632,0.379,0.697,0.52,0.749,0.324,0.352,0.302,0.345,0.098,0.015,0.346,0.459,0.966,0.638,0.078,0.167,0.526,0.318,0.145,0.0,-1,-1,-1,-1,-1,-1,-1,-1
NM_001128530.3512_3542	.((((.........))))((((...)))).	.((((.........)))).(((...)))..	0.403,0.417,0.06,0.079,0.0,0.238,1.0,0.314,0.146,0.172,0.018,0.233,0.344,0.064,0.036,0.0,0.108,0.165,0.183,0.137,0.083,0.673,1.0,1.0,1.0,0.412,0.132,0.184,0.154,0.389	0.59,0.76,0.143,0.189,0.438,0.121,0.458,0.668,0.304,0.636,0.183,0.102,0.429,0.451,0.39,0.172,0.153,0.152,0.305,0.317,0.372,0.399,1.0,1.0,1.0,0.58,0.118,0.395,0.317,0.169
NM_001128671.2743_2773	.((.((....)))).(((........))).	..............................	0.148,0.083,0.074,0.157,0.192,0.034,0.335,0.129,0.085,0.183,0.13,0.089,0.225,0.561,0.182,0.664,0.305,0.219,0.412,0.063,0.526,0.461,0.678,0.332,0.071,0.317,0.09,0.0,0.05,0.152	0.287,0.21,0.123,0.161,0.287,0.003,0.44,0.231,0.097,0.213,0.235,0.162,0.21,0.581,0.315,0.841,0.433,0.344,0.161,0.266,0.417,0.365,0.393,0.238,0.176,0.389,0.117,0.053,0.038,0.254
NM_001135579.772_802	(((.....)))...................	.(((...............)))........	0.307,0.239,0.076,0.244,0.2,0.319,0.154,0.055,0.113,0.195,0.226,0.787,0.23,0.437,0.099,0.276,0.168,0.009,0.028,0.199,0.241,0.484,0.123,0.107,0.186,0.933,0.356,0.53,0.331,0.262	0.411,0.439,0.116,0.185,0.578,0.274,0.019,0.222,0.3,0.39,0.153,0.979,0.437,0.388,0.326,0.202,0.413,0.062,0.133,0.189,0.048,0.706,0.13,0.299,0.426,0.555,0.611,0.586,0.702,0.506
NM_001142954.654_684	((((.......)))).((.......))...	((((.......))))...............	0.447,0.221,0.191,0.281,0.241,0.232,0.372,0.433,0.033,0.162,0.194,0.076,0.161,0.209,0.535,0.517,0.061,0.139,0.025,0.091,0.0,0.193,0.129,0.048,0.181,0.191,0.64,0.357,0.23,0.275	0.728,0.752,0.364,0.322,0.282,0.392,0.308,0.497,0.182,0.148,0.336,0.291,0.0,0.411,0.527,0.565,0.153,0.262,0.0,0.012,0.208,0.151,0.237,0.081,0.173,0.339,0.707,0.415,0.475,0.403
NM_001145624.3437_3467	(((.....))).((((......))))....	(((.....)))....(((....))).....	0.327,0.282,0.058,0.333,0.028,0.265,0.208,0.032,0.323,0.0,0.028,0.553,0.056,0.601,0.16,0.168,0.084,0.164,0.649,0.633,0.108,0.055,0.144,0.22,0.28,0.204,0.0,0.094,0.259,-1	0.399,0.313,0.231,0.0,0.196,0.154,0.449,0.247,0.043,0.059,0.197,0.949,0.166,0.785,0.176,0.05,0.131,0.0,0.565,0.408,0.169,0.0,0.0,0.382,0.397,0.159,0.218,0.06,0.109,0.068
NM_001159314.3320_3350	(((((.((..((....))..)))))))...	(((((.....((....))....)))))...	0.147,0.099,0.016,0.322,0.001,0.323,0.19,0.076,0.168,0.294,0.105,0.263,0.328,0.165,0.374,0.095,0.277,0.127,0.771,0.419,0.289,0.31,0.106,0.01,0.021,0.727,0.281,1.0,0.351,0.903	0.089,0.213,0.113,0.057,0.052,0.364,0.401,0.091,0.182,0.278,0.172,0.241,0.307,0.322,0.53,0.279,0.28,0.372,1.0,0.364,0.558,0.551,0.191,0.219,0.064,0.263,0.899,1.0,0.768,1.0
NM_001197257.2135_2165	..((....)).((...((((....))))))	..((....)).((.((.........)).))	0.457,0.517,0.132,0.628,0.036,0.089,0.0,0.138,0.0,0.0,0.049,0.0,0.055,0.34,0.098,0.307,1.0,0.524,0.342,0.096,0.078,0.187,0.2,0.0,0.18,0.183,0.686,0.0,0.0,0.096	1.0,1.0,0.568,0.665,0.419,0.426,0.466,0.437,0.0,0.124,0.032,0.253,0.123,0.285,0.177,0.355,1.0,1.0,0.768,0.275,0.035,0.233,0.436,0.064,0.433,0.209,0.72,0.334,0.064,0.287
NM_001199436.4555_4585	.......(((((((((...)))))))..))	.......((((((((.....))))))..))	0.095,0.168,0.011,0.215,0.057,0.028,0.146,0.076,0.009,0.013,0.087,0.205,0.074,0.109,0.273,0.21,0.511,0.43,0.243,0.192,0.163,0.235,0.009,0.016,0.365,0.254,0.52,0.259,0.047,0.042	0.196,0.29,0.019,0.358,0.107,0.202,0.163,0.141,0.055,0.083,0.198,0.172,0.0,0.267,0.371,0.395,0.618,0.559,0.509,0.603,0.244,0.042,0.135,0.128,0.025,0.404,0.572,0.236,0.096,0.136
NM_001200020.1099_1129	......((......))((.......))...	((((.((((........))..))...))))	0.308,0.45,0.129,0.424,0.123,0.162,0.083,0.154,0.34,0.86,0.899,0.355,0.258,0.284,0.353,0.12,0.04,0.052,0.187,0.612,0.239,0.187,0.314,0.304,0.113,0.296,0.277,0.282,0.247,0.456	0.375,0.621,0.082,0.034,0.169,0.0,0.107,0.069,0.255,0.517,0.555,0.381,0.279,0.406,0.41,0.09,0.048,0.065,0.256,0.34,0.358,0.182,0.241,0.361,0.057,0.24,0.271,0.099,0.144,0.406
NM_001201421.3301_3331	(((.....(((((.......))))))))..	..............................	0.046,0.166,0.053,0.242,0.09,0.119,0.115,0.261,0.524,0.652,0.252,0.311,0.274,0.274,0.485,0.329,0.832,0.431,0.09,0.024,0.369,0.009,0.076,0.181,0.17,0.021,0.094,0.343,0.012,0.095	0.206,0.605,0.074,0.499,0.461,0.308,0.315,0.236,0.433,0.8,0.36,0.562,0.229,0.532,0.567,0.279,0.735,0.685,0.476,0.064,0.51,0.352,0.066,0.452,0.353,0.169,0.048,0.464,0.184,0.014
NM_001256655.1121_1151	(((.(((((....)))))....))).....	....(((((....)))))............	0.0,0.225,0.0,0.013,0.26,0.139,0.038,0.633,0.248,0.532,0.187,0.061,0.038,0.447,0.259,0.421,0.153,0.443,0.43,0.518,1.0,0.274,0.596,0.784,0.249,0.255,0.594,0.88,0.727,1.0	0.11,0.287,0.06,0.279,0.427,0.175,0.111,0.036,0.271,0.575,0.595,0.149,0.117,0.549,0.687,0.541,0.329,0.368,0.58,1.0,1.0,0.405,0.659,0.587,0.31,0.302,0.602,1.0,0.651,0.518
NM_001256656.1966_1996	.....((........)).............	..((...)).....................	0.216,0.405,0.327,0.169,0.045,0.005,0.0,0.0,0.334,0.0,0.071,0.879,0.01,0.28,0.212,0.153,0.098,0.399,0.215,0.459,0.331,0.872,0.807,0.373,0.274,0.234,1.0,0.245,0.19,0.254	0.449,1.0,0.632,0.33,0.496,0.244,0.588,0.185,0.0,0.024,0.078,0.334,0.071,0.319,0.364,0.183,0.133,0.409,0.173,0.336,0.745,0.923,0.882,0.484,0.592,0.698,1.0,0.758,0.668,0.892
NM_001270540.1080_1110	.........(((.((.........)).)))	..((..........))(((......)))..	0.548,0.461,0.135,0.758,0.033,0.074,0.0,0.306,0.26,0.991,0.218,0.12,0.487,0.03,0.0,0.0,0.0,0.053,0.186,0.241,0.851,0.774,0.11,0.066,0.0,0.0,0.0,0.044,0.0,0.053	0.989,0.862,0.317,0.555,0.046,0.0,0.111,0.533,0.825,0.622,0.58,0.393,1.0,0.364,0.0,0.065,0.0,0.0,0.423,0.145,1.0,0.749,0.412,0.24,0.0,0.0,0.0,0.07,0.021,0.078
NM_001271459.1345_1375	(((.(((....)))))).((...)).....	....(((...((....))..))).......	0.06,0.038,0.284,0.062,0.013,0.0,0.167,0.0,0.167,0.0,0.0,0.27,0.168,0.0,0.835,0.136,0.09,0.108,0.226,0.05,0.209,0.247,0.116,0.058,0.105,0.082,0.241,0.584,0.147,0.177	0.138,0.371,0.514,0.206,0.639,0.031,0.094,0.03,0.17,0.0,0.093,0.233,0.168,0.0,0.687,0.598,0.343,0.347,0.416,0.38,0.539,0.119,0.0,0.27,0.0,0.083,0.322,0.026,0.357,0.25
NM_001277124.1009_1039	.((...((((.......))))..)).....	......((((.......)))).........	0.391,0.276,0.074,0.128,0.246,0.22,0.52,0.173,0.089,0.082,0.405,0.15,0.081,0.25,0.147,0.687,0.112,0.385,0.229,0.162,0.228,0.351,0.12,0.063,0.074,0.465,0.461,0.151,0.092,0.378	0.565,0.67,0.137,0.375,0.216,0.136,0.553,0.365,0.13,0.193,0.205,0.178,0.073,0.135,0.378,0.32,0.194,0.029,0.265,0.225,0.35,0.208,0.234,0.219,0.117,0.537,0.538,0.292,0.056,0.431
NM_001289907.1243_1273	.......((((..((((.....))))))))	..(((((......)))))............	0.397,0.329,0.104,0.491,0.0,0.0,0.0,0.0,0.392,0.098,1.0,0.285,0.348,0.229,0.109,0.421,0.008,0.167,0.212,0.781,1.0,0.165,0.261,0.24,0.318,0.271,0.247,0.04,0.022,0.058	0.614,0.859,0.24,0.081,0.115,0.013,0.0,0.081,0.217,0.373,1.0,0.338,0.728,0.491,0.218,0.693,0.063,0.18,0.252,0.633,1.0,0.321,0.336,0.28,0.258,0.419,0.337,0.137,0.05,0.128
NM_001301360.1563_1593	((((((.(......))).))))........	((((..((......))..))))........	0.377,0.261,0.107,0.461,0.0,0.0,0.107,0.319,0.367,0.588,0.277,1.0,0.743,0.423,0.41,0.101,0.157,0.106,0.024,0.092,0.23,0.21,0.2,0.019,0.163,0.184,0.199,0.376,0.32,0.772	0.627,0.585,0.211,0.373,0.038,0.119,0.178,0.33,0.221,0.709,0.299,1.0,0.883,0.783,0.698,0.232,0.359,0.276,0.296,0.097,0.397,0.512,0.648,0.232,0.286,0.497,0.532,0.612,0.773,0.675
NM_001302634.1218_1248	.((((((((...))))).........))).	.((((.(((.((.......)).))))))).	0.085,0.045,0.028,0.015,0.016,0.248,0.139,0.113,0.372,0.144,0.997,0.13,0.283,0.401,0.414,0.313,0.022,0.122,0.08,0.184,0.198,0.456,0.163,0.805,0.267,0.639,0.427,0.011,0.103,0.257	0.122,0.452,0.019,0.0,0.288,0.261,0.07,0.122,0.368,0.363,0.335,0.39,0.215,0.521,0.539,0.482,0.076,0.0,0.0,0.041,0.0,0.087,0.353,0.627,0.23,0.462,0.478,0.184,0.0,0.22
NM_001305464.5094_5124	.......((.....))..............	..((...)).....................	0.198,0.317,0.035,0.319,0.078,0.053,0.148,0.087,0.126,1.0,0.457,0.748,0.505,0.286,0.295,0.239,0.302,0.999,0.319,0.178,0.886,0.787,1.0,0.493,0.594,0.475,0.3,0.207,0.152,0.379	0.46,0.685,0.174,0.282,0.231,0.195,0.376,0.099,0.134,0.733,0.371,1.0,0.752,0.645,0.746,0.345,0.342,0.762,0.587,0.557,1.0,1.0,0.988,0.829,0.667,0.602,0.435,0.459,0.241,0.433
NM_001305467.2168_2198	(((.......))).................	....(((...((.......))...)))...	0.051,0.0,0.116,0.021,0.0,0.045,0.088,0.07,0.014,0.01,0.002,0.0,0.07,0.074,0.141,0.093,0.368,0.19,0.258,0.042,0.356,0.528,0.078,0.165,0.167,0.536,1.0,0.421,0.354,0.157	0.039,0.158,0.267,0.096,0.032,0.0,0.089,0.247,0.0,0.002,0.0,0.0,0.095,0.137,0.102,0.112,0.13,0.26,0.383,0.289,0.227,0.542,0.303,0.267,0.395,0.739,0.78,0.384,0.524,0.263
NM_001305471.3826_3856	..(((.((...)).))).((.....))...	..(((.........))).((.....))...	0.287,0.13,0.124,0.589,0.011,0.712,0.342,0.441,0.124,0.0,0.126,0.11,0.248,0.345,0.37,0.177,0.073,0.0,0.061,0.093,0.993,0.985,0.043,1.0,0.325,0.44,0.149,0.31,0.244,0.683	0.553,0.403,0.142,0.237,0.0,1.0,0.348,0.572,0.136,0.157,0.213,0.104,0.455,1.0,0.377,0.16,0.088,0.045,0.174,0.031,0.604,1.0,0.075,1.0,0.598,0.491,0.179,0.457,0.284,0.598
NM_001308551.1184_1214	....(((((((...))))))).........	.(((.(((........))))))........	0.532,0.479,0.138,0.541,0.525,0.69,0.181,0.382,0.422,0.455,0.854,0.737,0.264,0.248,0.316,0.248,0.0,0.0,0.418,0.423,0.273,0.349,0.41,0.266,0.982,0.231,0.603,0.174,0.573,0.241	0.66,0.991,0.286,0.584,1.0,0.704,0.145,0.831,0.852,0.717,1.0,0.875,0.318,0.309,0.182,0.51,0.078,0.107,0.554,0.517,0.41,0.246,0.815,0.616,0.959,0.492,0.32,0.54,0.436,0.179
NM_001309527.1565_1595	........((....((......))...)).	..............................	0.066,0.3,0.028,0.165,0.202,0.28,0.272,0.211,0.179,0.825,0.457,0.897,0.084,0.179,0.285,0.022,0.032,0.318,0.805,0.265,0.724,0.894,0.134,0.068,0.153,0.458,0.368,0.075,0.164,0.229	0.288,0.538,0.127,0.014,0.242,0.321,0.239,0.693,0.167,1.0,0.56,0.831,0.396,0.433,0.584,0.306,0.132,0.488,0.855,0.097,1.0,1.0,0.494,0.406,0.295,0.678,0.705,0.485,0.376,0.649
NM_001309527.2495_2525	(((....((((.((....))))))...)))	.......((((.((....))))))......	0.033,0.06,0.051,0.319,0.175,0.154,0.035,0.072,0.259,0.077,0.048,0.48,0.557,0.669,0.248,1.0,0.77,1.0,0.276,0.155,0.129,0.041,0.063,0.601,0.23,1.0,0.63,0.434,0.227,0.009	0.231,0.426,0.177,0.452,0.323,0.559,0.138,0.24,0.338,0.226,0.191,0.398,0.36,0.993,0.38,1.0,0.979,0.928,0.396,0.329,0.344,0.315,0.352,0.756,0.866,1.0,0.895,0.958,0.411,0.043
NM_001312917.2371_2401	...((...((((......))))...))...	...((..(((((......)).))).))...	0.391,0.241,0.1,0.112,0.24,0.379,0.456,0.211,0.492,0.172,0.09,0.096,0.262,0.176,0.466,0.071,0.527,0.101,0.191,0.02,0.406,0.076,0.141,0.009,0.061,0.028,0.568,0.243,0.701,0.341	0.699,0.579,0.326,0.073,0.455,0.455,0.775,0.603,0.498,0.35,0.292,0.273,0.205,0.352,0.564,0.049,0.354,0.397,0.304,0.002,0.562,0.164,0.168,0.036,0.157,0.152,0.362,0.522,0.401,0.479
NM_001313811.8433_8463	(((((....)).)))...............	..............................	0.206,0.405,0.086,0.233,0.185,0.094,0.0,0.072,0.055,0.042,0.407,0.189,0.238,0.2,0.154,0.451,0.942,0.996,0.478,0.453,0.258,0.469,0.232,0.992,0.978,1.0,0.446,0.36,0.146,0.055	0.584,0.836,0.278,0.204,0.243,0.258,0.215,0.4,0.208,0.196,0.289,0.199,0.419,0.418,0.352,0.4,1.0,0.959,0.433,0.493,0.478,0.388,0.415,1.0,1.0,1.0,1.0,0.468,0.236,0.253
NM_001316933.927_957	(((.(((((.....))))))))........	.((((.((((........))))...)))).	0.0,0.007,0.06,0.292,0.061,0.2,0.051,0.418,0.161,0.419,0.51,0.666,0.129,0.111,0.146,0.049,0.32,0.187,0.194,0.249,0.17,0.741,0.683,1.0,0.394,0.433,0.236,0.205,0.286,0.0	0.033,0.185,0.032,0.0,0.104,0.242,0.12,0.391,0.0,0.26,0.517,0.32,0.366,0.113,0.01,0.359,0.399,0.322,0.133,0.245,0.369,0.678,0.577,1.0,0.575,0.449,0.242,0.542,0.371,0.356
NM_001320078.4730_4760	.......(((((((......))).))))..	((((.......)))).((...)).......	0.398,0.443,0.122,0.441,0.0,0.258,0.227,0.0,0.138,0.015,0.146,0.098,0.049,0.063,0.012,0.032,0.057,0.032,0.088,0.206,0.095,0.0,0.48,0.629,0.233,0.281,0.127,0.41,0.305,1.0	0.334,0.505,0.443,0.276,0.402,0.602,0.225,0.033,0.285,0.015,0.33,0.056,0.172,0.173,0.122,0.202,0.158,0.534,0.228,0.008,0.187,0.047,0.497,0.673,0.475,0.49,0.946,0.47,0.173,1.0
NM_001326693.1605_1635	..((((((..............))).))).	..((......))..................	0.0,0.114,0.057,0.683,0.404,0.496,0.088,0.158,0.088,0.07,0.088,0.0,0.368,0.34,0.0,0.066,0.066,0.0,0.257,0.365,0.404,0.444,0.091,0.111,0.318,0.452,0.29,0.195,0.578,0.947	0.351,0.142,0.097,0.866,0.579,0.589,0.533,0.535,0.191,0.15,0.192,0.06,0.555,0.356,0.51,0.302,0.199,0.165,0.547,0.671,0.82,0.952,0.166,0.286,0.8,1.0,0.656,0.521,0.822,0.821
NM_001327786.4141_4171	(((.((((..(((......)))))))))).	(((..(((.....)))..))).........	0.116,0.192,0.0,0.351,0.026,0.247,0.215,0.305,0.326,0.84,0.197,0.156,0.634,0.068,0.107,0.414,0.149,0.0,0.044,0.272,0.215,0.402,0.175,0.491,0.149,0.342,0.149,0.026,0.823,0.708	0.095,0.471,0.25,0.194,0.021,0.106,0.462,0.309,0.519,0.592,0.41,0.207,0.298,0.479,0.45,0.442,0.458,0.317,0.279,0.186,0.295,0.275,0.663,0.598,0.19,0.805,0.425,0.369,0.836,0.606
NM_001327787.3039_3069	..(((...((...)).)))...........	..(((...........)))...........	0.512,0.808,0.128,0.317,0.14,0.122,0.117,0.479,0.169,0.206,0.142,0.31,0.137,0.756,0.123,0.233,0.061,0.111,0.107,0.439,0.365,0.069,0.273,0.501,0.137,0.281,0.825,0.788,0.419,0.157	1.0,0.967,0.159,0.271,0.254,0.248,0.23,0.663,0.189,0.341,0.116,0.61,0.403,0.455,0.654,0.454,0.391,0.154,0.201,0.259,0.151,0.235,0.231,0.668,0.268,0.433,0.735,0.865,0.568,0.38
NM_001327797.4008_4038	..........((.(((....)))..))...	..((......)).(((....))).......	0.472,0.356,0.119,0.268,0.086,0.282,0.103,0.177,0.262,0.216,0.204,0.08,0.06,0.016,0.0,0.016,0.056,0.166,0.019,0.273,0.149,0.116,0.506,0.046,0.052,0.168,0.18,0.214,0.369,0.155	0.779,0.947,0.147,0.262,0.082,0.367,0.307,0.3,0.323,0.344,0.206,0.052,0.207,0.291,0.175,0.039,0.083,0.124,0.164,0.144,0.12,0.004,0.302,0.148,0.116,0.506,0.19,0.045,0.38,0.368
NM_001328125.3807_3837	...((((.....))))((....))......	...((((.....))))..............	0.339,0.288,0.034,0.213,0.106,0.069,0.442,0.276,0.644,1.0,0.565,0.147,0.288,0.133,0.066,0.348,0.058,0.191,0.423,0.723,0.429,0.311,0.056,0.182,0.406,0.034,0.089,0.344,0.468,1.0	0.466,0.664,0.302,0.166,0.252,0.125,0.037,0.101,0.696,1.0,0.588,0.413,0.082,0.273,0.249,0.225,0.104,0.214,0.233,0.49,0.315,0.412,0.216,0.336,0.468,0.111,0.306,0.113,0.477,0.618
NM_001328126.631_661	.((((.....((........))...)))).	.((((((......))..........)))).	0.929,0.625,0.046,0.417,0.171,0.0,0.118,0.206,0.294,0.21,0.299,0.155,0.147,0.087,0.475,1.0,0.43,0.151,0.287,0.052,0.0,0.306,0.194,0.0,0.053,0.05,0.053,0.322,0.225,0.32	1.0,0.738,0.351,0.19,0.119,0.28,0.2,0.476,0.106,0.832,0.679,0.622,0.102,0.298,0.675,0.814,1.0,0.538,0.299,0.198,0.298,0.451,0.574,0.255,0.174,0.113,0.022,0.417,0.212,0.618
NM_001328126.974_1004	...((((.....))))((....))......	...((((.....))))..............	0.421,0.338,0.024,0.102,0.0,0.246,0.414,0.344,0.686,1.0,0.585,0.181,0.094,0.048,0.101,0.424,0.004,0.067,0.178,0.633,0.301,0.273,0.112,0.138,0.411,0.061,0.207,0.267,0.346,0.988	0.546,0.539,0.243,0.227,0.246,0.048,0.364,0.115,0.393,1.0,0.493,0.418,0.25,0.164,0.198,0.177,0.198,0.0,0.364,0.465,0.345,0.292,0.097,0.325,0.296,0.16,0.208,0.157,0.563,0.741
NM_001328387.2693_2723	(((((...)).))).(((........))).	...............(((........))).	0.207,0.0,0.0,0.777,0.064,0.931,0.822,0.269,0.017,1.0,1.0,0.105,0.265,0.129,0.158,0.445,0.018,0.151,0.34,0.511,0.456,1.0,0.346,0.637,0.182,0.01,0.01,1.0,0.201,0.0	0.134,0.204,0.115,0.209,0.134,0.95,0.693,0.705,0.512,1.0,1.0,0.2,0.309,0.337,0.19,0.21,0.328,0.0,0.083,0.558,0.17,0.646,0.064,0.536,0.14,0.069,0.193,0.533,0.113,0.214
NM_001328509.1352_1382	.((((((((......))))...))))....	.((((((((.....))))....))))....	0.162,0.398,0.125,0.26,0.195,0.231,0.374,0.557,0.703,0.162,0.771,0.612,0.597,0.17,0.272,0.066,0.062,0.091,0.604,0.16,0.168,0.137,0.28,0.108,0.073,0.142,0.705,0.148,0.039,0.049	0.459,0.415,0.364,0.463,0.51,0.256,0.505,0.944,1.0,0.213,0.438,0.491,0.332,0.585,0.46,0.062,0.143,0.206,0.934,0.077,0.465,0.365,0.629,0.222,0.349,0.237,0.381,0.426,0.172,0.323
NM_001328530.3789_3819	.....(((((.((((......)))))))))	.....(((.((((((......)))))))))	0.649,0.127,0.241,0.097,0.0,0.0,0.192,0.154,0.0,0.159,0.0,0.141,0.0,0.186,0.044,0.148,0.245,0.046,0.384,-1,-1,-1,-1,-1,-1,-1,-1,-1,-1,-1	0.563,0.545,0.267,0.378,0.0,0.055,0.463,0.204,0.086,0.265,0.0,0.0,0.0,0.16,0.096,-1,-1,-1,-1,-1,-1,-1,-1,-1,-1,-1,-1,-1,-1,-1
NM_001328573.1342_1372	...............((........))...	..............................	0.097,0.235,0.095,0.161,0.14,0.083,0.221,0.054,0.18,0.064,0.183,0.559,0.325,0.82,0.698,0.224,0.032,0.337,0.045,0.096,0.025,0.037,0.0,0.061,0.253,0.176,0.072,0.312,0.107,0.12	0.345,0.307,0.386,0.332,0.58,0.094,0.337,0.267,0.165,0.361,0.145,0.242,0.357,1.0,0.675,0.472,0.067,0.578,0.101,0.254,0.239,0.29,0.0,0.341,0.421,0.136,0.412,0.305,0.039,0.432
NM_001328581.3007_3037	..(((.(((.........)).)...)))..	..(((.((......)).)))..........	0.493,0.405,0.141,0.065,0.159,0.249,0.15,0.0,0.133,0.646,0.261,0.504,0.751,0.132,0.359,0.024,0.094,0.147,0.252,0.0,0.843,0.533,0.035,0.175,0.189,0.222,0.086,0.097,0.364,0.107	0.953,0.402,0.182,0.173,0.381,0.57,0.501,0.153,0.216,0.466,0.727,0.526,0.876,0.194,0.03,0.126,0.26,0.273,0.108,0.133,0.65,0.315,0.255,0.055,0.579,0.611,0.135,0.15,0.304,0.046
NM_001328592.2213_2243	..(((((((...))))).))((......))	..(((((((...)))).)))((......))	0.129,0.172,0.052,0.362,0.0,0.193,0.427,0.308,0.536,1.0,1.0,1.0,0.724,0.216,0.383,0.063,0.138,0.254,0.092,0.141,0.298,0.022,0.0,0.06,0.161,0.135,0.376,0.118,0.075,0.403	0.343,0.405,0.162,0.153,0.094,0.225,0.462,0.342,0.297,1.0,0.869,1.0,0.482,0.227,0.347,0.0,0.415,0.462,0.035,0.183,0.331,0.058,0.0,0.119,0.04,0.154,0.284,0.194,0.108,0.192
NM_130976.2167_2197	((((.((.((.....)).)))).)).....	..((.((.((.....)).))))........	0.16,0.405,0.0,0.361,0.0,0.075,0.115,0.1,0.279,0.457,0.936,0.0,0.133,0.063,0.109,0.185,0.087,0.016,0.0,0.043,0.0,0.0,0.032,0.143,0.215,0.798,0.695,0.339,0.14,0.344	0.488,0.739,0.271,0.343,0.156,0.004,0.243,0.312,0.736,0.633,0.778,0.027,0.129,0.044,0.048,0.0,0.118,0.0,0.022,0.134,0.045,0.066,0.166,0.18,0.384,0.592,0.695,0.395,0.149,0.355
NM_131009.1771_1801	(((..((((((((......)))))))))))	.....((((((((......))))))))...	0.227,0.28,0.106,0.605,0.217,0.05,0.326,0.222,0.09,0.357,0.24,0.276,0.159,0.185,0.276,0.141,0.416,0.704,0.224,0.132,0.312,0.16,0.291,0.045,0.0,0.039,0.016,0.217,0.126,0.104	0.488,0.575,0.206,0.331,0.103,0.317,0.644,0.419,0.278,0.362,0.47,0.499,0.328,0.4,0.337,0.412,0.502,0.403,0.134,0.101,0.314,0.279,0.339,0.172,0.127,0.093,0.08,0.214,0.186,0.313
NM_131024.1484_1514	....(((....(((........)))..)))	...........(((........))).....	0.173,0.215,0.053,0.567,0.023,0.147,0.092,0.0,0.382,0.04,0.573,0.157,0.002,0.291,0.221,0.357,0.361,0.195,0.547,0.519,0.381,0.168,0.238,0.824,0.234,0.588,0.636,0.345,0.029,0.134	0.125,0.364,0.189,0.503,0.343,0.451,0.459,0.238,0.59,0.358,0.811,0.474,0.202,0.368,0.244,0.615,0.605,0.277,0.739,0.737,0.611,0.229,0.624,0.565,0.719,0.363,1.0,0.322,0.318,0.154
NM_131057.2450_2480	.((((.(((((......))))).))))...	...(((..........)))...........	0.312,0.509,0.215,0.597,0.018,0.175,0.218,0.187,0.278,0.175,0.497,0.828,0.486,0.589,0.221,0.329,0.198,0.078,0.217,1.0,0.489,0.302,0.271,0.743,0.924,0.191,0.688,0.898,1.0,0.564	0.276,0.938,0.229,0.154,0.041,0.038,0.308,0.258,0.393,0.393,0.726,0.525,0.809,0.919,0.396,0.571,0.189,0.156,0.359,1.0,0.567,0.264,0.538,1.0,1.0,0.293,0.945,1.0,1.0,0.831
NM_131210.3428_3458	(((....))).((.(((....)))..))..	.((((.....))))(((....)))......	0.135,0.638,0.043,0.074,0.05,0.034,0.018,0.0,0.02,0.035,0.156,0.0,0.128,0.103,0.037,0.034,0.026,0.242,0.354,0.048,0.22,0.309,0.0,0.076,0.118,0.105,0.03,0.152,0.388,0.372	0.162,0.891,0.048,0.184,0.0,0.21,0.029,0.065,0.114,0.08,0.183,0.0,0.072,0.143,0.109,0.051,0.071,0.292,0.339,0.152,0.468,0.0,0.142,0.0,0.308,0.427,0.143,0.221,0.307,0.434
NM_131250.2221_2251	.((((.(((...))).))))..........	.((((...........))))..........	0.279,0.347,0.021,0.181,0.362,0.214,0.169,0.316,0.506,0.331,0.143,0.674,0.088,0.454,0.258,0.337,0.123,0.229,0.357,0.344,0.747,0.743,1.0,0.353,0.0,0.003,0.736,0.504,0.377,0.338	0.522,0.486,0.217,0.415,0.673,0.249,0.562,0.506,0.567,0.612,0.287,0.499,0.429,0.528,0.372,0.495,0.307,0.445,0.752,0.321,0.741,1.0,1.0,0.831,0.263,0.185,0.542,0.404,0.575,0.303
NM_131355.3043_3073	....((((........))))..........	.(((((((....)).)).))).........	0.469,0.395,0.013,0.334,0.225,0.068,0.262,0.37,0.577,0.383,0.747,0.138,0.642,0.332,0.299,0.237,0.221,0.166,0.438,0.133,0.795,0.323,0.598,0.101,0.295,0.146,0.319,0.187,0.707,0.416	0.648,0.701,0.191,0.276,0.244,0.281,0.564,0.245,0.604,0.442,0.81,0.747,0.586,0.691,0.632,0.331,0.442,0.764,0.475,0.049,1.0,0.869,0.487,0.382,0.32,0.318,0.377,0.424,0.681,0.702
NM_131370.1720_1750	............(((...((....))))).	(((...((.....))..)))..........	0.075,0.105,0.107,0.204,0.0,0.074,0.383,0.485,0.361,0.73,0.096,0.0,0.015,0.012,0.505,0.147,0.072,0.0,0.109,0.502,0.0,0.083,0.827,0.234,0.304,0.04,0.165,0.342,0.157,0.632	0.172,0.103,0.143,0.088,0.04,0.066,0.088,0.134,0.377,0.879,0.446,0.179,0.132,0.338,0.572,0.287,0.0,0.197,0.203,0.382,0.149,0.055,0.447,0.158,0.217,0.522,0.5,0.987,0.346,1.0
NM_131382.1465_1495	.........((...((......))...)).	..((.......)).((......))......	0.284,0.171,0.138,0.491,0.104,0.148,0.166,0.33,0.226,0.229,0.053,0.062,0.059,0.186,0.003,0.016,0.153,0.072,0.494,0.072,0.018,0.196,0.241,0.0,0.173,0.332,0.114,0.026,0.0,0.115	0.452,0.515,0.305,0.565,0.308,0.426,0.365,0.502,0.555,0.504,0.249,0.135,0.0,0.105,0.0,0.0,0.272,0.053,0.218,0.0,0.177,0.258,0.205,0.0,0.263,0.109,0.205,0.068,0.023,0.135
NM_131524.1762_1792	.((((.......((....))......))))	..............................	0.081,0.168,0.075,0.483,0.216,0.186,0.22,0.182,0.218,1.0,0.285,0.874,0.207,0.364,0.134,0.064,0.126,0.433,0.07,0.86,0.124,0.535,0.456,0.11,0.136,0.145,0.229,0.165,0.131,0.135	0.282,0.563,0.359,0.624,0.235,0.262,0.252,0.264,0.161,1.0,0.525,0.805,0.489,0.211,0.427,0.149,0.092,0.725,0.08,0.712,0.373,0.481,0.591,0.105,0.082,0.293,0.337,0.093,0.217,0.138
NM_131596.4620_4650	(((((....)))))..((((...))))...	(((((....)))))................	0.0,0.095,0.094,0.071,0.196,0.126,0.57,1.0,0.463,0.143,0.064,0.092,0.009,0.0,0.299,0.413,0.589,0.139,0.39,0.129,0.079,0.61,0.289,0.239,0.072,0.046,0.266,0.082,0.069,0.151	0.087,0.066,0.048,0.043,0.416,0.26,0.484,0.977,0.814,0.383,0.101,0.222,0.097,0.125,0.655,0.391,0.513,0.377,0.672,0.397,0.341,0.586,0.38,0.361,0.249,0.12,0.289,0.2,0.188,0.277
NM_131599.892_922	....((.(((.(((.....))))))))...	.......(((.(((.....)))))).....	0.658,0.257,0.167,1.0,0.338,0.536,0.365,0.309,1.0,1.0,1.0,0.3,0.039,0.037,0.026,0.363,0.056,0.076,0.161,0.003,0.203,0.509,0.037,0.098,0.246,0.453,0.368,0.574,0.763,0.37	0.638,0.398,0.332,0.779,0.529,0.221,0.955,0.478,1.0,1.0,1.0,0.89,0.037,0.17,0.108,0.098,0.196,0.12,0.067,0.169,0.229,0.374,0.11,0.214,0.34,0.481,0.737,0.391,0.911,0.565
NM_131715.1913_1943	.(((....))).(((..........)))..	.(((....)))...................	0.249,0.209,0.073,0.364,0.202,0.117,0.297,0.356,0.067,0.38,0.051,0.062,0.32,0.064,0.511,0.561,0.281,0.006,0.291,0.031,0.387,0.256,0.0,0.031,0.216,0.249,0.215,0.17,0.5,0.655	0.398,0.227,0.409,0.27,0.344,0.185,0.532,0.661,0.114,0.38,0.39,0.181,0.598,0.186,1.0,1.0,0.961,0.233,0.398,0.25,0.478,0.213,0.327,0.151,0.296,0.475,0.556,0.271,0.398,0.484
NM_131715.1945_1975	................(((.....)))...	..............................	0.129,0.403,0.021,0.559,0.019,0.219,0.161,0.104,0.9,0.391,0.16,0.625,0.751,1.0,0.211,0.164,0.023,0.514,0.728,0.32,0.212,1.0,0.297,0.794,0.108,0.353,0.834,0.263,1.0,0.185	0.236,0.288,0.12,0.546,0.297,0.037,0.415,0.488,1.0,0.65,0.351,1.0,1.0,1.0,0.634,0.422,0.327,0.443,0.808,0.412,0.138,1.0,0.684,0.639,0.578,0.449,1.0,0.515,0.743,0.484
NM_131773.1994_2024	.......(((((((((....)))).)))))	.((((.......((((....))))))))..	0.067,1.0,0.018,0.0,0.0,0.091,0.042,0.657,0.635,0.491,0.0,0.0,0.069,0.232,0.028,0.095,0.132,0.0,0.0,0.0,0.029,0.341,0.154,0.0,0.0,0.035,0.003,0.288,0.21,0.826	0.288,1.0,0.101,0.076,0.048,0.0,0.174,0.994,1.0,0.926,0.174,0.001,0.162,0.229,0.013,0.243,0.038,0.043,0.0,0.138,0.039,0.348,0.18,0.099,0.0,0.0,0.132,0.261,0.221,1.0
NM_131790.2652_2682	.....(((((((((......))).))))))	.....(((((((((......))))).))))	0.156,0.161,0.058,0.155,0.133,0.077,0.06,0.045,0.022,0.191,0.21,0.134,0.216,0.83,0.232,0.258,0.221,0.564,0.566,0.487,0.206,1.0,0.214,0.443,0.157,0.276,0.359,0.462,0.357,0.133	0.26,0.4,0.174,0.335,0.227,0.278,0.146,0.077,0.114,0.27,0.108,0.06,0.361,0.485,0.231,0.33,0.303,0.691,0.487,0.418,0.314,1.0,0.399,0.301,0.504,0.388,0.48,0.463,0.826,0.528
NM_153669.1206_1236	..(((............)))..........	..............................	0.273,0.419,0.122,0.486,0.482,0.007,0.588,0.637,0.085,0.725,0.338,0.66,0.087,0.147,0.208,0.0,0.186,0.236,0.012,0.66,0.641,0.439,0.129,1.0,0.209,0.405,0.284,0.738,1.0,0.225	0.53,0.863,0.459,0.602,1.0,0.303,0.777,0.598,0.171,0.879,0.927,0.79,0.567,0.218,0.201,0.077,0.207,0.504,0.229,0.707,1.0,0.295,0.015,1.0,0.281,0.515,0.727,0.25,1.0,0.273
NM_170763.2193_2223	..(((....((....))...))).......	..(((...............))).......	0.196,0.583,0.154,0.673,0.111,0.358,0.513,0.092,0.205,0.0,0.0,0.051,0.894,0.778,0.345,0.532,0.698,0.184,0.509,0.016,0.049,0.154,0.083,0.098,0.015,0.305,0.169,0.013,0.128,0.013	0.804,1.0,0.359,0.154,0.418,0.423,0.62,0.547,0.271,0.416,0.218,0.237,0.582,0.818,1.0,0.918,1.0,0.337,0.166,0.177,0.305,0.348,0.501,0.282,0.0,0.143,0.203,0.188,0.052,0.018
NM_173221.1644_1674	..(((((......)))).)((((...))))	.((((((......)))).))..........	0.279,0.186,0.347,0.458,0.32,0.098,0.07,0.166,0.307,0.217,0.393,0.527,0.748,0.372,0.017,0.043,0.01,0.0,0.035,0.285,0.085,0.04,0.343,0.54,0.306,0.0,0.491,0.095,0.282,0.479	0.068,0.468,0.52,0.558,0.347,0.316,0.217,0.328,0.45,0.239,0.375,0.146,0.782,0.548,0.092,0.113,0.125,0.196,0.106,0.161,0.205,0.282,0.324,0.219,0.248,0.281,0.534,0.181,0.384,0.41
NM_173237.1476_1506	(((((((......))......))).))...	...........(((((......))..))).	0.31,0.303,0.114,0.235,0.084,0.073,0.028,0.024,0.553,0.736,0.196,0.004,0.0,0.002,0.0,0.066,0.162,0.048,0.249,0.241,0.092,0.015,0.008,0.146,0.414,0.324,0.152,0.185,0.0,0.052	0.365,0.468,0.351,0.115,0.309,0.245,0.067,0.167,0.735,0.878,0.377,0.197,0.037,0.052,0.0,0.0,0.001,0.017,0.284,0.187,0.106,0.052,0.09,0.061,0.259,0.524,0.305,0.109,0.106,0.063
NM_173273.2294_2324	..........(((.............))).	..(((.((......))..))).........	0.937,0.257,0.297,0.543,0.022,0.699,0.128,0.147,0.068,0.509,0.159,0.086,0.023,0.171,0.332,0.798,0.271,0.193,0.119,0.15,0.504,0.301,0.146,0.54,0.891,0.669,0.232,0.078,0.265,0.65	0.746,1.0,0.409,0.348,0.083,0.228,0.307,0.227,0.521,0.583,0.359,0.201,0.244,0.257,0.158,0.945,0.323,0.248,0.357,0.172,0.448,0.164,0.237,0.533,0.618,0.355,0.384,0.174,0.191,0.434
NM_183072.2441_2471	.........((((((((...))))))))..	.........(((((((.....)))))))..	0.368,0.22,0.037,0.166,0.08,0.312,0.055,0.189,0.062,0.078,0.099,0.099,0.06,0.0,0.018,0.0,0.046,0.582,0.007,0.11,0.206,0.074,0.049,0.0,0.0,0.122,0.145,0.287,0.311,0.015	0.449,0.437,0.093,0.261,0.311,0.387,0.059,0.489,0.344,0.215,0.273,0.192,0.126,0.166,0.106,0.116,0.107,0.494,0.174,0.218,0.188,0.292,0.136,0.109,0.087,0.189,0.23,0.371,0.424,0.061
NM_183072.2701_2731	..(((((((..........)))...)))).	..((((...................)))).	0.135,0.143,0.062,0.187,0.1,0.2,0.383,0.278,0.319,0.315,0.268,1.0,0.396,0.411,0.914,0.344,0.205,0.822,0.224,0.111,0.102,0.026,0.133,0.031,0.062,0.0,0.0,0.052,0.173,0.019	0.265,0.291,0.184,0.198,0.161,0.187,0.391,0.529,0.606,0.448,0.376,0.983,0.54,0.258,0.837,0.295,0.191,0.568,0.281,0.232,0.112,0.107,0.095,0.156,0.126,0.05,0.034,0.083,0.098,0.086
NM_194384.1987_2017	((((..((((.....))))..)))).....	..((((.....)))).(((....)))....	0.82,0.29,0.204,0.199,0.195,0.573,0.145,0.075,0.457,0.183,0.055,0.271,0.202,0.293,0.282,0.083,0.0,0.313,0.301,0.224,0.281,0.426,0.1,0.239,0.214,0.305,0.31,-1,-1,-1	0.995,0.856,0.18,0.0,0.032,0.51,0.0,0.118,0.578,0.208,0.162,0.388,0.117,0.311,0.22,0.267,0.076,0.189,0.227,0.279,0.265,0.099,0.0,0.105,0.257,0.315,0.171,-1,-1,-1
NM_194408.2333_2363	.........((.....))((((....))))	..................((((....))))	0.587,0.357,0.164,0.447,0.021,0.706,0.098,0.719,0.327,0.218,0.325,0.451,0.784,0.259,0.735,0.656,0.18,0.033,0.124,0.008,0.425,0.536,0.379,0.421,0.211,0.088,0.136,0.0,0.0,0.024	0.95,0.991,0.479,0.469,0.36,0.666,0.219,0.469,0.425,0.051,0.673,0.424,0.359,0.02,0.915,0.858,0.836,0.181,0.199,0.145,0.039,0.435,0.649,0.642,0.261,0.22,0.149,0.001,0.053,0.051
NM_198209.951_981	..((((((.......)))...)))......	..(((..((((..........))))..)))	0.212,0.488,0.145,0.36,0.291,0.094,0.083,0.261,0.042,0.637,0.589,0.53,0.838,0.243,0.735,0.273,0.234,0.073,0.785,0.589,0.178,0.311,0.27,0.54,0.082,0.274,0.136,0.145,0.201,0.147	0.423,0.41,0.179,0.616,0.344,0.201,0.299,0.454,0.049,0.32,0.669,0.202,0.477,0.155,0.61,0.44,0.509,0.42,0.51,0.437,0.299,0.555,0.383,0.106,0.112,0.0,0.281,0.26,0.074,0.15
NM_198375.1675_1705	(((....))).(((...)))..........	...........(((...)))..........	0.507,0.26,0.093,0.149,0.001,0.11,0.0,0.08,0.236,0.0,0.0,0.0,0.018,0.0,0.048,0.052,0.299,0.062,0.023,0.3,0.874,0.325,0.123,1.0,0.289,0.629,0.081,0.0,0.0,0.258	0.874,0.581,0.183,0.215,0.216,0.103,0.0,0.018,0.707,0.0,0.112,0.0,0.107,0.026,0.0,0.432,0.41,0.12,0.165,0.693,1.0,0.85,0.406,0.532,0.3,0.986,0.507,0.0,0.052,0.085
NM_198922.1844_1874	......(((((((...)))).)))......	......(((((((...))).))))......	0.236,0.312,0.12,0.359,0.23,0.0,0.128,0.061,0.915,0.012,0.058,0.0,0.047,0.043,0.171,0.118,0.207,0.312,0.168,0.615,0.01,0.081,0.111,0.456,0.109,0.0,0.287,0.289,0.96,0.899	0.42,0.857,0.328,0.0,0.258,0.013,0.118,0.408,0.595,0.0,0.143,0.054,0.073,0.213,0.32,0.206,0.429,0.795,0.18,0.818,0.189,0.223,0.237,0.347,0.172,0.117,0.168,0.469,0.638,1.0
NM_199272.2480_2510	..((...)).....(((..........)))	..............(((..........)))	0.533,0.5,0.153,0.348,0.0,0.267,0.207,0.014,0.007,0.242,0.0,0.319,0.091,0.0,0.052,0.02,0.357,0.084,0.013,0.019,0.097,0.22,0.02,0.362,0.058,0.088,0.189,0.119,0.05,0.22	0.754,1.0,0.406,0.461,0.419,0.695,0.516,0.505,0.1,0.349,0.298,0.219,0.598,0.251,0.259,0.118,0.194,0.218,0.109,0.129,0.0,0.416,0.029,0.398,0.258,0.21,0.275,0.126,0.122,0.314
NM_199547.1655_1685	((((((..((((....))))...)))))).	..((((..((((....))))...))))...	0.365,0.438,0.147,0.582,0.118,0.226,0.01,0.177,0.341,0.129,0.202,0.168,0.417,0.332,0.143,0.484,0.619,0.041,0.259,0.018,0.089,0.056,0.158,0.0,0.171,0.222,0.274,0.079,1.0,0.221	0.494,1.0,0.341,0.619,0.426,0.233,0.18,0.253,0.506,0.25,0.193,0.528,0.675,0.675,0.271,0.625,0.785,0.365,0.4,0.275,0.287,0.348,0.368,0.073,0.387,0.369,0.555,0.252,1.0,0.802
NM_199559.1682_1712	...((((...................))))	..............................	0.468,0.919,0.243,0.402,0.224,0.179,0.766,0.41,0.652,0.581,0.913,0.834,0.615,0.193,0.758,0.335,1.0,0.655,0.479,0.368,0.515,1.0,0.721,1.0,1.0,0.129,0.361,0.199,0.122,0.841	0.669,1.0,0.373,0.512,0.542,0.208,0.624,0.617,0.75,0.433,0.483,0.723,1.0,0.188,0.927,0.318,0.922,0.486,0.599,0.492,0.562,0.566,0.752,0.609,1.0,0.138,0.341,0.193,0.321,0.907
NM_199585.1302_1332	..(((.((.((......)))).))).....	.((((((.....)))..........)))..	0.08,0.171,0.107,0.292,0.148,0.059,0.437,0.153,0.0,0.062,0.055,0.059,0.076,0.201,0.551,0.931,0.614,0.501,0.834,1.0,1.0,0.086,0.127,0.067,0.08,0.066,0.068,0.0,0.079,0.07	0.131,0.518,0.151,0.414,0.108,0.076,0.429,0.717,0.0,0.113,0.038,0.064,0.109,0.102,0.336,0.511,0.885,1.0,1.0,0.85,1.0,0.425,0.48,0.061,0.171,0.187,0.0,0.019,0.094,0.082
NM_199602.1452_1482	..(((........)))....(((...))).	.(((....((....))....))).......	0.097,0.167,0.07,0.236,0.0,0.0,0.072,0.341,0.53,0.117,0.275,0.085,0.09,0.035,0.0,0.0,0.0,0.092,0.126,0.061,0.0,0.065,0.0,0.142,0.098,0.251,0.593,0.353,1.0,1.0	0.24,0.457,0.295,0.059,0.414,0.017,0.358,0.865,0.571,0.379,0.223,0.065,0.243,0.541,0.234,0.036,0.0,0.268,0.234,0.434,0.064,0.107,0.0,0.075,0.366,0.46,0.906,0.619,1.0,1.0
NM_199625.2724_2754	..((((((.((....)).))....))))..	..((((..................))))..	0.539,0.213,0.031,0.38,0.046,0.106,0.104,0.131,0.158,0.256,0.256,0.228,0.276,0.116,0.0,0.157,0.23,0.353,0.191,0.379,0.73,0.569,0.0,0.193,0.282,0.285,0.048,0.0,0.474,0.152	0.993,1.0,0.199,0.491,0.228,0.222,0.331,0.403,0.402,0.514,0.476,0.85,0.454,0.225,0.183,0.298,0.859,0.804,0.345,0.609,1.0,0.989,0.502,0.638,0.346,0.543,0.278,0.0,0.415,0.483
NM_199671.933_963	((((....................))))..	.........((((............)))).	0.34,0.431,0.122,0.645,0.018,0.308,0.492,0.484,1.0,0.418,0.331,0.079,0.016,0.0,0.0,0.001,0.161,0.364,0.924,0.467,0.363,0.349,0.206,0.126,0.036,0.068,0.034,0.523,0.355,0.145	0.448,0.801,0.128,0.584,0.058,0.47,0.837,0.547,1.0,0.505,0.356,0.146,0.0,0.0,0.0,0.014,0.253,0.347,1.0,0.588,0.192,0.412,0.34,0.306,0.146,0.191,0.118,0.478,0.506,0.013
NM_199707.2795_2825	(((...)))..((.(((........)))))	..(((......)))(((........)))..	0.078,0.209,0.032,0.069,0.0,0.06,0.466,0.08,0.286,0.19,0.006,0.094,0.05,0.081,0.011,0.0,0.031,0.083,0.146,0.371,0.284,0.123,0.09,0.283,0.22,0.0,0.02,0.0,0.013,0.066	0.235,0.647,0.255,0.0,0.093,0.111,0.409,0.243,0.251,0.369,0.064,0.12,0.0,0.212,0.04,0.0,0.018,0.056,0.237,0.28,0.423,0.037,0.074,0.357,0.253,0.0,0.205,0.032,0.062,0.29
NM_199719.1489_1519	(((...)))....(((((.......)))))	...(((((....((......))...)))))	0.062,0.05,0.124,0.19,0.105,0.083,0.133,-1,-1,-1,-1,-1,-1,-1,-1,-1,-1,-1,-1,-1,-1,-1,-1,-1,-1,-1,-1,-1,-1,-1	0.041,0.142,0.107,0.046,0.132,0.039,0.092,-1,-1,-1,-1,-1,-1,-1,-1,-1,-1,-1,-1,-1,-1,-1,-1,-1,-1,-1,-1,-1,-1,-1
NM_199734.915_945	............(((((......)).))).	..............................	0.03,0.099,0.046,0.14,0.112,0.109,0.133,0.256,0.344,1.0,0.258,0.181,0.093,0.209,0.231,0.323,0.634,0.646,0.175,0.518,0.625,0.208,0.046,0.352,0.31,0.318,0.442,0.308,0.197,0.491	0.104,0.364,0.141,0.262,0.473,0.258,0.358,0.57,0.32,1.0,0.603,0.183,0.375,0.214,0.348,0.775,0.742,1.0,0.491,0.499,0.871,0.397,0.166,0.402,0.223,0.535,0.535,0.316,0.253,0.555
NM_199746.1056_1086	..(((.....))).((.(((....))).))	..(((.....))).................	0.335,0.42,0.11,0.34,0.123,0.12,0.63,0.652,0.644,0.419,0.402,0.08,0.179,0.081,0.23,0.334,0.295,0.207,0.169,0.504,0.335,0.289,0.461,0.119,0.77,0.448,0.293,0.267,0.653,0.765	0.597,0.599,0.3,0.358,0.136,0.313,0.51,1.0,0.491,0.761,0.544,0.23,0.225,0.2,0.215,0.423,0.715,0.229,0.435,0.487,0.586,0.799,0.319,0.378,0.602,0.753,0.808,0.085,0.588,0.822
NM_199766.1273_1303	(((........))).((....)).......	..((...(((....))).))..........	0.0,0.012,0.027,0.088,0.0,0.063,0.053,0.0,0.001,0.039,0.06,0.079,0.063,0.0,0.067,0.034,0.009,0.026,0.033,0.404,0.061,0.246,0.428,0.038,0.25,0.118,0.449,0.548,0.04,0.0	0.005,0.032,0.066,0.0,0.11,0.089,0.039,0.028,0.005,0.042,0.073,0.0,0.107,0.108,0.076,0.091,0.11,0.236,0.235,0.206,0.205,0.435,0.595,0.202,0.245,0.108,0.534,1.0,0.1,0.289
NM_199779.2336_2366	((((.(((.....)))))))..........	..............................	0.444,0.594,0.112,0.556,0.102,0.22,0.327,0.159,0.517,0.772,1.0,0.452,0.674,0.463,0.111,0.45,0.587,0.534,0.518,0.715,0.356,0.07,0.223,0.159,0.05,0.316,0.216,0.092,0.104,0.139	0.941,1.0,0.361,0.603,0.341,0.522,0.697,0.286,0.72,1.0,1.0,0.431,0.799,0.746,0.348,1.0,0.663,0.609,1.0,1.0,0.45,0.201,0.651,0.284,0.101,0.157,0.202,0.168,0.136,0.306
NM_199797.2067_2097	.(((.((....))))).((.....))....	.(((.((....))))).((...))......	0.141,0.223,0.101,0.538,0.126,0.09,1.0,0.907,0.239,0.083,0.281,0.069,0.076,0.106,0.126,0.108,0.167,0.528,0.02,0.215,0.151,0.21,0.131,0.137,0.132,0.036,0.282,0.502,0.493,0.683	0.22,0.32,0.275,0.259,0.32,0.331,1.0,0.816,0.153,0.068,0.685,0.158,0.215,0.085,0.069,0.164,0.454,0.423,0.179,0.482,0.0,0.423,0.176,0.229,0.191,0.166,0.112,0.366,0.41,0.687
NM_199824.1333_1363	............((.(((.....)))))..	............(((.((.....)))))..	0.236,0.415,0.039,0.136,0.17,0.117,0.624,0.157,0.277,0.235,0.306,0.684,0.131,0.469,0.564,0.01,0.463,0.297,0.462,0.878,0.343,0.274,0.116,0.0,0.067,0.003,0.018,0.055,0.034,0.193	0.448,0.747,0.265,0.144,0.327,0.204,0.644,0.479,0.0,0.594,0.27,0.493,0.337,0.407,0.788,0.324,0.843,0.265,0.611,0.755,0.714,0.595,0.18,0.082,0.061,0.068,0.121,0.083,0.061,0.038
NM_199842.1270_1300	(((.................))).......	..............................	0.248,0.416,0.197,0.902,0.091,0.095,0.069,0.0,0.231,0.262,0.073,0.0,0.074,0.011,0.0,0.122,0.108,0.445,0.023,0.087,0.03,0.142,0.216,0.663,0.597,0.166,0.184,0.202,0.41,0.176	0.229,0.722,0.459,1.0,0.256,0.19,0.375,0.09,0.187,0.172,0.056,0.116,0.182,0.119,0.325,0.065,0.164,0.332,0.216,0.263,0.147,0.234,0.304,0.723,0.825,0.681,0.395,0.348,0.669,0.072
NM_199917.854_884	(((.(((...(((...)))..))))))...	((((.((((......))))...).)))...	0.171,0.171,0.0,-1,0.152,0.0,-1,-1,-1,-1,-1,-1,-1,-1,-1,-1,-1,-1,-1,-1,-1,-1,-1,-1,-1,-1,-1,-1,-1,-1	0.356,0.505,0.16,0.194,0.074,0.234,0.138,0.107,0.323,0.077,0.304,0.218,0.172,0.286,0.732,0.565,0.639,0.163,0.513,0.512,0.754,0.899,0.415,0.346,0.04,0.0,0.051,0.0,0.529,0.408
NM_199972.1626_1656	...(((....((....))......)))...	...(((....(((...))).....)))...	0.229,0.257,0.07,0.448,0.027,0.094,0.114,0.418,0.239,0.138,0.002,0.024,0.163,0.78,0.579,0.167,0.311,0.277,0.332,0.611,0.581,1.0,0.535,0.512,0.077,0.148,0.0,0.0,0.027,0.397	0.065,0.575,0.161,0.442,0.336,0.27,0.392,0.524,0.408,0.323,0.233,0.095,0.52,0.653,0.833,0.293,0.399,0.099,0.027,0.43,0.495,0.923,0.46,0.775,0.342,0.178,0.013,0.04,0.078,0.291
NM_200015.1345_1375	...............((........))...	..............................	0.133,0.292,0.133,0.273,0.175,0.041,0.241,0.105,0.245,0.187,0.11,0.81,0.314,0.762,0.56,0.229,0.106,0.318,0.019,0.05,0.079,0.154,0.006,0.133,0.333,0.186,0.033,0.283,0.0,0.0	0.282,0.381,0.251,0.322,0.31,0.061,0.275,0.143,0.228,0.248,0.204,0.323,0.286,0.829,0.631,0.382,0.115,0.36,0.158,0.378,0.092,0.293,0.001,0.268,0.543,0.086,0.286,0.305,0.18,0.264
NM_200032.2552_2582	(((...)))..........((((...))))	(((...)))...((.((((...)))).)).	0.115,0.243,0.132,0.679,0.077,0.15,0.087,0.137,0.775,0.654,0.148,0.04,0.073,0.405,0.277,0.158,0.192,0.383,0.145,0.014,0.166,0.102,0.151,0.483,0.218,0.583,0.758,0.128,0.092,0.085	0.168,0.23,0.381,0.304,0.328,0.135,0.188,0.139,0.388,0.359,0.304,0.129,0.223,0.287,0.083,0.133,0.166,0.212,0.258,0.3,0.134,0.147,0.241,0.318,0.282,0.552,0.837,0.38,0.0,0.085
NM_200066.1088_1118	..........(((((.....)).)))....	............((((((....)))..)))	0.298,0.303,0.129,0.441,0.195,0.285,0.402,0.741,1.0,0.465,0.107,0.103,0.055,0.175,0.313,0.088,0.349,0.546,0.574,0.516,0.755,0.246,0.066,0.091,0.277,0.21,0.068,0.062,0.963,0.172	0.41,0.489,0.262,0.378,0.326,0.277,0.417,1.0,1.0,0.685,0.305,0.138,0.1,0.156,0.264,0.301,0.285,0.469,0.606,0.747,1.0,0.734,0.194,0.21,0.391,0.375,0.172,0.163,0.873,0.235
NM_200073.2881_2911	..(((....))).....(((((...)))))	..(((....))).(((........)))...	0.51,0.421,0.217,0.39,0.001,0.73,0.981,0.601,0.404,0.437,0.265,0.4,0.089,0.054,0.109,0.054,0.03,0.061,0.054,0.128,0.222,0.072,0.428,0.072,0.469,0.045,0.173,0.361,0.054,0.421	0.503,0.883,0.254,0.114,0.164,0.636,0.738,0.469,0.797,0.69,0.248,0.206,0.416,0.19,0.053,0.098,0.138,0.13,0.089,0.042,0.776,0.193,0.44,0.271,0.594,0.183,0.191,0.364,0.248,0.686
NM_200089.2675_2705	((((((.......))).)))..........	.(((((.......)))))............	0.118,0.199,0.117,0.534,0.075,0.154,0.057,0.306,0.016,0.19,0.182,0.233,0.339,0.033,0.083,0.138,0.127,0.164,0.099,0.256,0.098,0.029,0.245,0.112,0.04,0.072,0.032,0.099,0.097,0.035	0.378,0.463,0.113,0.516,0.334,0.569,0.136,0.455,0.051,0.179,0.38,0.468,0.596,0.131,0.056,0.199,0.0,0.376,0.239,0.205,0.275,0.096,0.274,0.301,0.089,0.044,0.122,0.114,0.102,0.039
NM_200099.881_911	..(((..((((......))))....)))..	....(((......)))..............	0.857,0.468,0.129,0.685,0.056,0.814,0.408,0.176,0.292,0.155,0.151,0.208,0.339,0.155,0.37,1.0,0.717,0.02,0.074,0.0,0.147,0.205,1.0,0.385,0.32,0.44,0.364,0.867,0.298,0.261	1.0,0.764,0.743,0.233,0.116,0.54,0.651,0.233,0.479,0.192,0.595,0.464,0.437,0.218,0.294,0.47,1.0,0.215,0.05,0.073,0.327,0.171,1.0,0.317,0.233,0.735,0.427,0.766,0.252,0.406
NM_200101.1752_1782	(((((......))))).((((...))))..	(((((......)))))..............	0.098,0.146,0.104,0.222,0.095,0.4,0.086,0.322,0.292,1.0,0.279,0.28,0.196,0.23,0.066,0.286,0.158,0.625,0.452,0.156,0.514,0.5,0.443,0.207,0.168,0.291,0.333,0.114,0.193,0.233	0.303,0.418,0.191,0.347,0.351,0.321,0.46,0.568,0.351,1.0,0.649,0.634,0.151,0.446,0.237,0.402,0.264,0.778,0.928,0.518,0.599,0.707,0.456,0.43,0.183,0.354,0.28,0.269,0.247,0.186
NM_200128.1653_1683	(((((......))))).(.....)......	((((........)))).(.....)......	0.061,0.171,0.007,0.192,0.312,0.522,0.294,0.346,0.321,0.331,0.531,0.826,0.698,0.434,0.5,0.547,0.135,0.337,0.972,1.0,0.475,0.763,0.117,1.0,0.673,1.0,0.762,0.177,0.162,0.093	0.077,0.358,0.0,0.343,0.529,1.0,0.461,0.095,0.335,0.152,0.623,1.0,0.671,0.547,0.4,0.556,0.445,0.306,0.734,1.0,0.464,0.709,0.103,1.0,0.574,1.0,0.921,0.065,0.137,0.036
NM_200152.1900_1930	..(((.....))).((........))....	..(((.....))).................	0.593,0.282,0.001,0.126,0.275,0.207,0.772,0.44,0.659,0.492,0.742,0.157,0.135,0.119,0.429,0.422,0.084,0.24,0.242,0.283,0.755,1.0,0.009,0.039,0.087,0.0,0.093,0.127,0.116,0.017	0.694,0.524,0.199,0.116,0.129,0.001,0.132,0.76,0.352,0.533,0.616,0.326,0.161,0.74,0.334,1.0,0.183,0.293,0.748,0.56,0.934,0.817,0.214,0.064,0.052,0.073,0.129,0.121,0.057,0.2
NM_200164.1434_1464	.......(((.(((.......))).)))..	.........((((............)))).	0.719,0.257,0.022,0.455,0.0,0.119,0.252,0.034,0.274,0.006,0.285,0.0,0.011,0.432,0.19,0.254,0.444,0.478,0.889,0.283,0.137,0.166,0.403,0.35,0.188,0.66,0.038,0.168,0.036,0.12	0.77,0.432,0.032,0.528,0.116,0.148,0.435,0.0,0.155,0.225,0.159,0.158,0.111,0.583,0.249,0.519,0.506,0.782,0.672,0.502,0.209,0.357,0.497,0.661,0.393,0.214,0.699,0.0,0.333,0.198
NM_200164.3822_3852	...............((((((...))))))	...............(((((.....)))))	0.36,0.163,0.07,0.321,0.0,0.322,0.269,0.562,1.0,0.739,1.0,0.668,1.0,0.167,0.238,0.317,0.147,0.251,0.29,0.507,0.309,1.0,1.0,0.672,0.471,0.285,0.027,0.003,0.153,0.317	1.0,0.314,0.359,0.0,0.097,0.148,0.452,0.965,1.0,0.878,1.0,0.887,1.0,0.626,0.502,0.162,0.309,0.348,0.471,0.544,0.61,1.0,1.0,0.342,0.467,0.608,0.238,0.256,0.454,0.0
NM_200177.1178_1208	......(((.((.............)))))	......(((................)))..	0.481,0.472,0.17,0.409,0.1,0.164,0.224,0.104,0.684,0.145,0.137,0.343,0.831,0.247,0.137,0.128,0.352,0.538,0.808,1.0,0.394,0.589,0.456,0.427,0.124,0.452,0.079,0.044,0.0,0.187	0.781,1.0,0.396,0.315,0.343,0.351,0.409,0.3,0.595,0.129,0.223,0.457,1.0,0.526,0.293,0.19,0.453,0.945,0.838,1.0,0.969,0.732,0.955,1.0,0.31,0.324,0.277,0.24,0.439,0.294
NM_200182.1957_1987	..((...)).(((((...))))).......	..((...)).((((.....)))).......	0.0,0.026,0.008,0.183,0.0,0.0,0.075,0.0,0.0,0.122,0.0,0.0,0.037,0.028,0.934,0.292,1.0,1.0,0.838,0.053,0.033,0.083,0.12,1.0,1.0,1.0,1.0,0.057,0.074,0.104	0.0,0.127,0.0,0.0,0.058,0.039,0.084,0.0,0.068,0.335,0.063,0.012,0.01,0.038,0.848,0.727,1.0,1.0,1.0,0.077,0.048,0.001,0.12,1.0,1.0,1.0,1.0,0.17,0.089,0.213
NM_200241.1905_1935	.((((.....))))..(((....)))....	.......((((.......))))........	0.0,0.056,0.0,0.029,0.0,0.0,0.0,0.0,0.0,0.0,0.0,0.0,0.031,0.017,0.276,0.077,0.075,0.359,0.007,0.0,0.075,0.092,0.0,0.15,0.143,1.0,0.79,0.454,0.163,0.33	0.0,0.322,0.0,0.0,0.234,0.049,0.0,0.105,0.0,0.049,0.061,0.191,0.075,0.006,0.415,0.182,0.424,0.316,0.227,0.066,0.231,0.194,0.345,0.421,0.384,1.0,1.0,1.0,0.375,0.464
NM_200258.1386_1416	...........((((..........)))).	..............................	0.419,0.313,0.241,0.37,0.086,0.395,0.261,0.507,0.107,0.052,0.13,0.275,0.482,0.168,0.0,0.148,0.049,0.217,0.317,0.841,0.168,0.157,0.392,0.079,0.551,0.298,0.152,0.665,0.28,0.07	0.519,0.591,0.374,0.159,0.062,0.291,0.353,0.501,0.323,0.175,0.359,0.516,0.583,0.494,0.121,0.055,0.08,0.22,0.183,0.605,0.3,0.215,0.33,0.258,0.727,0.381,0.206,0.91,0.694,0.254
NM_200286.933_963	.(((((.((.......))..))))).....	.(((((..............))))).....	0.204,0.309,0.0,0.0,0.032,0.059,0.0,0.292,0.042,0.426,0.19,0.015,1.0,0.229,1.0,0.061,0.456,0.103,0.0,0.206,0.093,0.227,0.031,0.221,0.0,0.0,0.347,0.0,0.201,0.034	0.245,0.388,0.197,0.218,0.0,0.311,0.18,0.332,0.389,0.522,0.748,0.216,1.0,1.0,1.0,0.164,0.528,0.121,0.408,0.293,0.059,0.0,0.007,0.327,0.239,0.197,0.39,0.211,0.126,0.071
NM_200305.1269_1299	(((((((..............)))..))))	((((..((..............))..))))	0.388,0.134,0.107,0.295,0.0,0.126,0.038,0.288,0.092,0.262,0.815,0.15,0.517,0.038,0.0,0.092,0.265,0.164,0.871,0.13,0.04,0.102,0.436,0.319,0.221,0.182,0.124,0.307,0.273,0.123	0.536,0.322,0.128,0.293,0.135,0.136,0.277,0.212,0.377,0.272,1.0,0.055,0.917,0.174,0.064,0.0,0.461,0.045,1.0,0.385,0.452,0.225,0.393,0.739,0.275,0.489,0.616,0.0,0.041,0.004
NM_200306.706_736	..............................	.((((..........))))...........	0.141,0.049,0.0,0.785,0.053,0.207,0.51,0.221,0.425,0.396,0.527,0.527,0.254,1.0,0.361,0.71,0.538,0.61,1.0,0.266,0.961,0.0,0.079,0.052,0.582,0.362,1.0,0.999,1.0,0.153	0.01,0.202,0.087,0.0,0.145,0.223,0.275,0.213,0.221,0.163,0.167,0.311,0.247,0.747,0.444,0.199,0.431,0.363,0.44,0.189,0.984,0.166,0.085,0.117,0.206,0.021,0.606,0.751,1.0,0.379
NM_200405.1976_2006	((((....((.(((....)))...))))))	((((.......(((....))).....))))	0.232,0.403,0.092,0.25,0.0,0.416,0.275,0.0,0.079,0.516,0.104,0.0,0.231,0.205,0.684,0.865,1.0,0.477,0.266,0.064,0.103,0.44,0.453,0.052,0.025,0.0,0.0,0.0,0.139,0.137	0.477,1.0,0.492,0.0,0.0,0.318,1.0,0.658,0.39,0.787,0.35,0.238,0.505,0.0,0.931,1.0,0.392,0.55,0.246,0.139,0.426,0.424,0.765,0.0,0.0,0.2,0.033,0.008,0.154,0.474
NM_200405.2343_2373	...........(((((.....)))..))..	............((((.....)))).....	1.0,0.437,0.202,1.0,0.476,0.267,0.843,0.982,0.378,0.417,0.002,0.0,0.0,0.025,0.473,0.349,0.613,0.35,0.053,0.003,0.027,0.153,0.094,0.113,0.438,0.0,0.165,0.0,0.234,0.695	0.735,0.811,0.269,0.819,0.148,0.153,0.274,0.578,0.66,0.0,0.128,0.098,0.0,0.116,0.588,0.323,0.621,0.367,0.096,0.033,0.131,0.139,0.169,0.074,0.241,0.28,0.278,0.073,0.459,0.363
NM_200438.2707_2737	.......(((((((...)))))...))...	.................(((.....)))..	0.478,0.238,0.059,0.636,0.216,0.147,0.14,0.316,0.208,0.705,0.743,0.251,0.192,0.358,0.087,0.444,0.195,0.638,0.295,0.298,0.167,0.264,0.93,0.033,0.545,0.0,0.064,0.016,0.049,0.032	0.639,0.476,0.235,0.138,0.267,0.458,0.527,0.233,0.354,1.0,0.664,0.61,0.452,0.79,0.191,0.623,0.829,0.726,0.392,0.126,0.436,0.0,1.0,0.956,0.307,0.0,0.17,0.044,0.067,0.0
NM_200517.921_951	......((((.(((....)))..))))...	..(((.((............))...)))..	0.409,0.286,0.045,0.367,0.103,0.0,0.167,0.427,0.602,0.736,1.0,0.399,0.585,0.715,1.0,1.0,0.42,0.125,0.371,0.222,0.207,0.226,0.264,0.106,0.089,0.136,0.125,0.603,0.061,0.324	0.498,0.705,0.314,0.048,0.323,0.147,0.252,0.61,0.609,0.742,1.0,1.0,1.0,1.0,1.0,1.0,1.0,0.426,0.543,0.748,0.514,0.315,0.446,0.113,0.067,0.147,0.231,0.326,0.04,0.459
NM_200522.5426_5456	...(((.....))).......(((...)))	...(((.....)))................	0.305,0.131,0.03,0.46,0.083,0.255,0.178,0.328,0.769,0.713,0.378,0.26,0.133,0.193,0.172,0.321,1.0,0.404,0.274,0.24,0.021,0.123,0.0,0.438,0.159,1.0,0.541,0.204,0.065,0.632	0.694,0.528,0.134,0.298,0.14,0.135,0.256,0.204,1.0,1.0,1.0,0.483,0.473,0.299,0.668,0.483,0.992,0.487,0.234,0.379,0.201,0.287,0.183,0.729,0.379,1.0,0.822,0.579,0.299,0.327
NM_200592.2633_2663	..(((((....((...)).....)))))..	....(((...))).((((((....))))))	0.134,0.346,0.102,0.11,0.234,0.151,0.419,0.551,0.538,0.086,0.139,0.227,0.415,0.483,0.127,0.372,0.066,0.391,0.402,0.791,0.707,0.638,0.092,0.255,0.124,0.0,0.139,0.204,0.083,0.334	0.227,0.414,0.147,0.021,0.609,0.0,0.264,0.273,0.459,0.049,0.651,0.0,0.472,0.492,0.838,0.111,0.141,0.047,0.328,0.244,0.347,0.915,0.542,0.328,0.12,0.325,0.121,0.706,0.182,0.356
NM_200667.1662_1692	((..((.((......)))).))........	..............................	0.244,0.406,0.04,0.101,0.0,0.0,0.029,0.223,0.16,0.239,0.496,0.163,0.297,0.215,0.235,0.189,0.19,0.217,0.691,0.876,0.143,1.0,0.103,0.175,0.359,0.4,0.47,1.0,0.935,1.0	0.284,0.768,0.077,0.192,0.043,0.01,0.277,0.507,0.323,0.375,0.976,0.602,0.157,0.468,0.142,0.328,0.368,0.312,0.624,1.0,0.451,0.795,0.171,0.12,0.857,0.735,0.503,1.0,1.0,1.0
NM_200682.1750_1780	..........(((.((.......)).))).	..((..........))..............	0.252,0.0,0.083,0.174,0.091,0.281,0.286,0.605,0.014,0.64,0.884,0.527,0.024,0.441,0.0,0.057,0.372,0.162,0.231,0.215,0.073,0.102,0.088,0.011,0.102,0.069,0.619,0.258,0.213,0.254	0.138,0.598,0.079,0.157,0.169,0.399,0.325,0.155,0.265,0.502,0.87,0.87,0.606,0.838,0.204,0.073,0.534,0.399,0.96,0.425,0.416,0.294,0.607,0.291,0.362,0.539,0.652,0.361,0.236,0.717
NM_200759.1130_1160	...((((...............))))....	...((((.....(((...))).))))....	0.732,0.593,0.145,0.432,0.0,0.084,0.954,1.0,1.0,0.728,1.0,0.483,0.205,0.788,0.204,0.771,0.254,0.849,0.073,0.287,0.126,0.177,0.57,0.057,0.383,0.67,0.385,0.462,0.893,0.192	0.779,1.0,0.172,0.0,0.145,0.06,0.313,0.581,0.508,0.504,0.536,0.653,0.29,0.591,0.272,0.187,0.0,0.567,0.238,0.111,0.0,0.243,0.378,0.141,0.301,0.673,0.043,0.365,0.57,0.167
NM_200781.1521_1551	..((........))((((....))))....	..((........))................	0.206,0.389,0.234,0.78,0.117,0.569,0.52,0.443,0.152,0.501,0.31,0.337,0.142,0.388,0.068,0.138,0.668,0.947,0.548,1.0,0.663,0.101,0.015,0.22,0.14,0.616,0.367,1.0,1.0,0.088	0.385,0.623,0.439,0.32,0.196,0.541,0.821,0.708,0.166,0.729,0.661,0.672,0.298,0.421,0.428,0.254,0.758,0.781,0.603,1.0,1.0,0.243,0.15,0.488,0.228,0.739,0.423,1.0,1.0,0.364
NM_200896.828_858	(((......)))..(((.........))).	..(((..........)))............	0.081,0.193,0.06,0.482,0.084,0.099,0.367,0.604,0.141,0.293,0.216,0.022,0.117,0.005,0.022,0.218,0.06,0.116,0.089,0.157,0.046,0.246,0.171,0.812,0.573,0.077,0.072,0.103,0.124,0.513	0.168,0.361,0.213,0.133,0.319,0.205,0.26,0.82,0.585,0.265,0.497,0.128,0.121,0.121,0.036,0.252,0.063,0.224,0.159,0.244,0.253,0.287,0.273,0.677,0.721,0.149,0.288,0.237,0.235,0.778
NM_200905.3809_3839	.((.((((...........)))))).....	..............................	0.293,0.3,0.095,0.373,0.143,0.449,0.222,0.463,0.121,0.995,0.56,0.871,0.514,0.427,0.605,0.094,0.746,0.213,0.363,0.193,0.099,0.309,0.149,0.225,0.335,0.398,0.593,0.298,0.252,0.0	0.411,0.497,0.338,0.527,0.282,0.462,0.331,0.634,0.37,0.793,0.566,0.657,0.94,0.885,0.846,0.113,0.495,0.579,0.348,0.421,0.322,0.296,0.44,0.646,0.232,0.317,0.736,0.706,0.661,0.069
NM_200908.1831_1861	..((.(((............)))..))...	.....(((............))).......	0.207,0.183,0.039,0.264,0.037,0.102,0.136,0.202,0.507,0.441,0.226,0.331,0.975,0.291,0.601,0.528,0.252,0.241,0.895,0.868,0.171,0.128,0.395,0.0,0.206,0.363,0.143,0.456,0.568,0.179	0.606,0.703,0.238,0.329,0.176,0.303,0.214,0.546,0.739,0.522,0.478,0.85,0.81,0.487,0.596,0.712,0.341,0.201,0.653,0.595,0.332,0.191,0.416,0.263,0.323,0.315,0.171,0.581,0.521,0.463
NM_200927.2591_2621	..((.((.((....)).))..)).......	..(((((..((.(((...))))))).))).	0.303,0.477,0.131,0.177,0.325,0.212,0.443,0.247,0.403,0.255,0.75,0.223,0.699,0.19,0.691,0.181,0.177,0.215,0.479,0.419,0.205,0.036,0.051,0.261,0.136,0.111,0.282,0.273,0.775,0.185	0.359,0.956,0.094,0.299,0.363,0.222,0.653,0.54,1.0,0.284,0.787,0.437,0.895,0.009,0.307,0.373,0.585,0.365,0.334,0.064,0.463,0.175,0.176,0.301,0.225,0.566,0.405,0.243,0.817,0.587
NM_200938.1822_1852	..((..............))..........	..............................	0.33,0.077,0.08,0.256,0.154,0.5,0.284,0.44,0.452,0.689,1.0,0.381,0.224,0.133,0.084,0.424,0.061,0.072,0.122,0.122,0.211,0.846,0.454,0.434,0.159,0.334,0.08,0.596,0.314,0.097	0.71,0.517,0.139,0.375,0.505,0.418,0.339,0.485,0.689,1.0,1.0,0.641,0.288,0.331,0.338,0.46,0.247,0.132,0.266,0.166,0.26,0.793,0.496,0.641,0.451,0.379,0.213,0.431,0.226,0.174
NM_200959.855_885	(((...)))..(((.............)))	(((...)))((.................))	0.129,0.267,0.187,0.452,0.0,0.0,0.197,0.0,0.016,0.0,0.0,0.028,0.191,0.548,0.164,0.28,0.0,0.42,0.914,0.604,0.339,0.023,0.008,0.0,0.267,0.008,0.186,0.063,0.072,0.096	0.328,0.779,0.322,0.44,0.464,0.165,0.453,0.042,0.0,0.047,0.0,0.335,0.068,0.753,0.737,0.805,0.285,0.555,1.0,1.0,1.0,0.0,0.581,0.192,0.219,0.0,1.0,0.176,0.144,0.21
NM_200962.1876_1906	......(((((......)))))........	....((((((.....)))).))........	0.311,0.406,0.072,0.782,0.032,0.384,0.119,0.016,0.448,0.566,0.206,0.033,0.245,0.153,0.605,0.122,0.566,0.428,0.0,0.194,0.3,0.125,0.379,0.579,0.188,0.285,0.298,1.0,0.217,0.254	0.587,0.718,0.537,0.0,0.221,0.467,0.231,0.371,0.731,0.6,0.546,0.151,0.672,0.203,0.643,0.255,0.6,0.079,0.343,0.22,0.106,0.059,0.203,0.703,0.274,0.487,0.727,1.0,0.896,0.388
NM_200978.3651_3681	..((((.....((......))....)))).	..((.......)).((((.....))))...	0.265,0.402,0.051,0.406,0.239,0.445,0.429,1.0,0.147,0.408,0.395,0.0,0.166,0.22,0.195,0.359,0.353,0.579,0.48,0.69,0.073,0.347,0.003,0.373,0.35,0.221,0.198,0.098,0.0,0.07	0.304,0.835,0.515,0.33,0.599,0.605,0.901,0.764,0.942,0.436,0.7,0.18,0.14,0.518,0.0,0.246,0.643,1.0,0.477,1.0,0.297,0.296,0.018,0.361,0.182,0.018,0.217,0.108,0.018,0.088
NM_201085.2544_2574	....(((((..((...))....))).))..	..............................	0.41,0.317,0.18,0.428,0.216,0.139,0.277,0.0,0.146,0.027,0.042,0.251,0.299,0.698,1.0,0.159,0.13,0.766,0.823,0.281,0.315,0.281,1.0,1.0,0.091,0.058,0.481,0.125,0.178,0.302	0.436,0.46,0.531,0.297,0.583,0.012,0.393,0.213,0.302,0.192,0.125,0.205,0.485,0.894,1.0,0.636,0.249,0.716,0.888,0.351,0.475,0.776,1.0,0.822,0.247,0.099,0.145,0.345,0.29,0.438
NM_201087.3198_3228	.......(((....)))(((....)))...	..(((..(((....))).))).........	0.306,0.547,0.062,0.686,0.123,0.316,0.385,0.146,0.205,0.778,0.284,0.267,0.353,0.056,0.121,0.195,0.111,0.021,0.19,0.106,0.109,0.027,0.726,0.157,0.128,0.107,0.132,0.0,0.575,1.0	0.66,1.0,0.238,0.57,0.324,0.276,0.937,0.382,0.576,0.609,0.832,0.585,0.491,0.506,0.222,0.512,0.323,0.229,0.352,0.163,0.308,0.23,0.695,0.182,0.316,0.275,0.13,0.345,0.752,0.979
NM_201142.2810_2840	((((((........)).)))).........	.(((((........)).)))..........	0.267,0.3,0.0,0.279,0.104,0.061,0.119,0.279,0.085,0.269,0.437,0.743,0.314,0.453,0.407,0.125,0.608,0.324,0.085,0.998,0.092,0.067,0.0,0.139,0.304,0.289,0.079,0.517,0.432,1.0	0.625,0.501,0.036,0.423,0.0,0.141,0.177,0.265,0.407,0.392,0.495,0.897,0.45,0.775,0.18,0.24,0.897,0.5,0.0,1.0,0.314,0.331,0.122,0.171,0.384,0.474,0.428,0.746,0.889,0.838
NM_201156.2140_2170	..(((....((......)).......))).	..(((.....................))).	0.108,0.26,0.149,0.314,0.0,0.033,0.224,0.198,0.322,0.065,0.129,0.689,0.33,0.589,0.461,0.688,0.223,0.058,0.033,0.857,1.0,0.572,0.895,0.629,0.188,0.054,0.189,0.0,0.054,0.042	0.067,0.375,0.067,0.306,0.184,0.091,0.023,0.322,0.553,0.341,0.249,0.566,0.684,0.481,1.0,0.617,0.436,0.504,0.656,1.0,1.0,1.0,1.0,1.0,0.418,0.269,0.636,0.052,0.049,0.059
NM_201185.840_870	(((...((((.....))))...))).....	..(((.((((.....))))....)))....	0.225,0.14,0.08,0.323,0.018,0.108,0.291,0.422,0.062,0.3,0.134,0.28,0.069,0.009,0.064,0.376,0.522,0.28,0.662,0.795,0.825,0.061,0.134,0.29,0.134,0.282,0.118,0.0,0.061,0.265	0.264,0.796,0.235,0.4,0.01,0.221,0.409,0.681,0.302,0.294,0.464,0.223,0.22,0.163,0.322,0.607,0.879,0.168,1.0,1.0,1.0,0.406,0.379,0.617,0.139,0.537,0.172,0.078,0.116,0.112
NM_201217.1920_1950	(((....))).((((........))))...	...........((((........))))...	0.15,0.028,0.0,0.043,0.0,0.0,0.277,0.097,0.261,0.011,0.063,0.102,0.203,0.145,0.421,0.195,0.122,0.415,1.0,0.512,0.495,1.0,0.15,0.585,0.133,0.397,0.211,0.364,0.416,0.681	0.364,0.218,0.151,0.052,0.134,0.0,0.404,0.071,0.345,0.095,0.112,0.303,0.151,0.181,0.54,0.332,0.451,0.78,1.0,1.0,0.431,1.0,0.241,0.589,0.34,0.366,0.452,0.515,0.672,0.671
NM_201304.2358_2388	(((..((....))..)))............	..............................	0.073,0.202,0.128,0.724,0.008,0.108,0.326,0.554,1.0,0.259,0.369,0.008,0.927,0.474,0.453,0.297,0.028,0.251,0.118,0.505,1.0,0.298,0.33,0.113,0.106,0.366,0.185,0.124,0.163,0.101	0.335,0.429,0.319,0.779,0.192,0.221,0.681,0.621,1.0,0.269,0.639,0.456,0.926,0.4,0.486,0.809,0.186,0.44,0.226,0.409,0.952,0.624,0.204,0.263,0.391,0.576,0.225,0.413,0.368,0.246
NM_201329.1053_1083	((.(((((((.......)).))).)).)).	((.(((((((.......))).)).)).)).	0.239,0.275,0.085,0.542,0.0,0.247,0.203,0.111,0.218,0.183,0.097,0.34,0.378,1.0,0.411,0.743,0.207,0.099,0.279,0.217,0.104,0.128,0.5,0.192,0.099,0.057,0.406,0.049,0.828,0.143	0.215,1.0,0.365,0.524,0.252,0.236,0.509,0.404,0.368,0.551,0.318,0.388,0.316,1.0,0.738,1.0,0.766,0.255,0.438,0.105,0.178,0.384,0.933,0.408,0.151,0.304,0.186,0.34,0.929,0.122
NM_201343.1400_1430	..((((((.....))))))..((....)).	.........((.(((((....))))).)).	0.379,0.679,0.203,0.611,0.273,0.224,0.344,0.316,0.511,0.347,0.153,0.098,0.075,0.076,0.064,0.066,0.0,0.045,0.029,0.185,0.381,0.148,0.118,0.332,0.196,0.11,0.147,0.09,0.111,0.415	0.968,1.0,0.408,0.703,0.494,0.464,0.687,0.827,0.966,0.534,0.302,0.423,0.049,0.17,0.124,0.177,0.072,0.0,0.26,0.312,0.541,0.297,0.239,0.308,0.019,0.029,0.204,0.044,0.055,0.145
NM_201474.4104_4134	.(((..((...))..)))............	..............................	0.254,0.595,0.0,0.422,0.003,0.235,0.439,0.001,0.312,0.104,0.0,0.224,0.053,0.1,0.027,0.101,0.074,0.154,0.123,0.488,0.44,0.315,0.362,0.593,1.0,0.134,0.629,0.569,0.459,0.637	0.257,1.0,0.293,0.245,0.028,0.185,0.713,0.07,0.548,0.121,0.272,0.136,0.297,0.046,0.403,0.1,0.159,0.7,0.662,0.722,0.634,0.78,0.908,0.665,1.0,0.578,0.651,0.414,0.829,0.921
NM_201489.1581_1611	..............................	(((...(((......))).)))........	0.328,0.109,0.0,0.227,0.11,0.279,0.257,0.577,0.247,0.058,0.292,0.458,0.344,0.219,0.089,0.171,0.123,0.19,0.278,0.122,0.243,0.468,0.703,0.589,0.947,1.0,1.0,0.352,0.095,0.376	0.217,0.111,0.025,0.23,0.135,0.116,0.199,0.382,0.288,0.079,0.218,0.384,0.181,0.226,0.067,0.062,0.0,0.095,0.234,0.0,0.051,0.168,0.432,0.854,1.0,0.884,1.0,0.417,0.169,0.246
NM_201489.2153_2183	..((....)).((.....))..........	..((....))....................	0.38,0.206,0.239,0.677,0.212,0.563,0.279,0.519,0.35,0.067,0.0,0.489,0.299,0.903,0.261,0.326,0.37,0.807,0.048,0.514,0.356,0.696,0.88,0.443,0.175,0.0,0.094,0.068,0.235,0.761	0.764,0.894,0.745,0.169,0.49,0.166,0.64,0.538,0.371,0.395,0.319,0.339,0.569,0.923,0.43,0.498,0.745,0.557,0.144,0.554,0.336,0.714,0.605,0.533,0.436,0.151,0.217,0.137,0.336,0.698
NM_201500.1892_1922	...(((...((((...)))).......)))	.........((((...))))..........	0.387,0.489,0.166,0.348,0.136,0.314,0.525,0.62,0.101,0.035,0.174,0.148,0.182,0.076,0.276,0.045,0.132,0.077,0.048,0.324,0.184,0.819,0.417,0.48,0.091,0.112,0.177,0.053,0.357,0.103	0.801,1.0,0.155,0.237,0.168,0.502,0.563,0.732,0.348,0.03,0.234,0.075,0.396,0.179,0.276,0.074,0.189,0.0,0.081,0.173,0.216,0.841,0.369,0.343,0.134,0.084,0.155,0.12,0.315,0.148
NM_201501.1671_1701	...........(((((........))))).	..............................	0.154,0.211,0.07,0.503,0.0,0.228,0.067,0.283,0.386,0.273,0.181,0.096,0.384,0.571,0.204,0.063,0.199,0.395,0.459,0.971,0.55,0.236,0.297,0.144,0.723,0.314,0.344,0.168,0.074,0.601	0.207,0.977,0.304,0.271,0.142,0.397,0.383,0.238,0.675,0.505,0.649,0.353,0.78,1.0,0.647,0.358,0.365,0.754,0.756,0.531,0.79,0.198,0.685,0.506,0.649,0.677,0.338,0.567,0.394,0.499
NM_201501.1967_1997	.((((...(((.......)))..))))...	..((......)).(((((......))))).	0.17,0.151,0.16,0.52,0.132,0.182,0.392,0.74,0.128,0.334,0.381,0.579,0.356,0.278,0.155,0.448,0.153,0.01,0.065,0.165,0.0,0.041,0.099,0.396,0.417,0.202,0.206,0.268,0.393,0.657	0.237,0.432,0.321,0.563,0.225,0.239,0.306,0.678,0.339,0.35,0.341,0.633,0.679,0.509,0.124,0.407,0.0,0.131,0.147,0.12,0.164,0.11,0.113,0.424,0.285,0.116,0.24,0.186,0.646,0.974
NM_205558.527_557	(((.........)))...............	((((................)).)).....	0.459,0.5,0.245,0.737,0.108,0.725,0.963,0.189,0.242,0.317,0.619,0.205,0.519,0.16,0.372,0.098,0.37,1.0,0.122,0.129,0.132,0.276,0.647,0.134,0.414,0.547,1.0,0.2,0.127,0.341	0.612,0.591,0.594,0.449,0.193,0.67,0.661,0.36,0.245,0.236,0.469,0.165,0.32,0.234,0.179,0.0,0.296,0.416,0.127,0.077,0.09,0.244,0.553,0.001,0.265,0.308,0.421,0.187,0.247,0.199
NM_205562.495_525	.(((((((((...)))......))))))..	..((((((((...)))......)))))...	0.462,0.408,0.056,0.064,0.0,0.075,0.106,0.187,0.213,0.252,0.04,0.052,0.142,0.081,0.153,0.235,0.269,0.677,0.562,0.72,0.588,0.096,0.175,0.075,0.091,0.092,0.918,0.206,0.444,0.093	0.565,0.876,0.145,0.014,0.122,0.058,0.124,0.373,0.152,0.399,0.12,0.106,0.225,0.179,0.226,0.263,0.399,0.35,0.541,0.701,0.692,0.221,0.344,0.248,0.218,0.056,0.866,0.362,0.099,0.19
NM_205597.1563_1593	...(((((...))))).(((((...)))))	...(((((...))))).((((.....))))	0.147,0.262,0.148,0.174,0.102,0.169,0.118,0.169,1.0,1.0,0.879,0.201,0.134,0.025,0.058,0.533,0.553,0.08,0.065,0.024,0.372,0.417,0.224,0.04,0.0,0.024,0.055,0.098,0.097,0.399	0.209,0.398,0.141,0.0,0.064,0.023,0.043,0.405,1.0,1.0,0.97,0.371,0.099,0.141,0.064,0.665,0.688,0.183,0.052,0.065,0.298,0.639,0.43,0.21,0.067,0.119,0.379,0.068,0.143,0.006
NM_205613.752_782	(((((((((......)))))..))))....	.((((((((......)))))..))).....	0.271,0.215,0.093,0.341,0.066,0.196,0.289,0.501,1.0,0.528,0.617,0.674,1.0,0.638,0.333,0.346,0.068,0.277,0.197,0.052,0.0,0.099,0.522,0.13,0.787,0.282,0.153,0.287,0.08,0.0	0.404,0.584,0.172,0.176,0.235,0.135,0.192,0.634,0.866,0.888,0.935,0.793,1.0,0.906,0.722,0.419,0.25,0.406,0.264,0.253,0.201,0.3,0.686,0.165,0.658,0.437,0.478,0.464,0.263,0.147
NM_205716.2656_2686	...(((.....((....)).....)))...	...(((..................)))...	0.064,0.401,0.039,0.45,0.188,0.355,0.298,0.0,0.281,0.559,0.328,0.371,0.477,0.647,0.358,0.299,0.398,0.154,0.467,0.381,0.0,0.559,0.315,0.383,0.131,0.085,0.446,0.456,0.936,0.463	0.17,0.349,0.202,0.31,0.53,0.343,0.152,0.288,0.273,0.657,0.527,0.278,0.803,0.621,0.395,0.227,0.306,0.395,0.652,0.608,0.604,0.376,0.876,0.575,0.218,0.369,0.485,0.975,0.81,0.967
NM_212636.1248_1278	....(((....)))................	..............................	0.346,0.264,0.057,0.315,0.045,0.107,0.72,0.231,0.621,0.029,0.203,0.612,0.0,1.0,0.225,0.982,0.565,0.356,0.487,0.274,0.425,1.0,0.348,0.558,0.119,0.298,0.169,0.274,0.312,0.813	0.644,0.781,0.318,0.245,0.517,0.192,0.735,0.561,0.554,0.267,0.334,0.73,0.202,1.0,0.428,0.845,0.731,0.863,0.422,0.558,0.38,1.0,0.511,0.177,0.268,0.046,0.24,0.106,0.244,0.517
NM_212663.2019_2049	..((((.((..((......))..)).))))	..((((................))))....	0.048,0.031,0.057,0.187,0.097,0.259,0.465,0.269,1.0,0.353,0.16,0.594,0.308,0.326,0.108,0.221,0.237,0.135,0.342,0.216,0.056,0.077,0.064,0.087,0.204,0.195,0.24,0.07,0.366,0.496	0.183,0.291,0.118,0.249,0.23,0.252,0.575,0.276,1.0,0.682,0.336,0.597,0.485,0.635,0.284,0.49,0.439,0.208,0.921,0.587,0.147,0.147,0.05,0.241,0.282,0.274,0.71,0.256,0.46,0.809
NM_212663.894_924	..((........)).((......)).....	..((........))................	0.198,0.251,0.226,0.496,0.111,0.291,0.445,0.762,0.934,0.235,0.32,0.319,0.114,0.111,0.38,0.075,0.222,0.407,0.744,1.0,0.293,0.12,0.089,0.024,0.0,0.28,0.041,0.153,0.127,0.044	0.228,0.544,0.275,0.436,0.113,0.303,0.882,1.0,1.0,0.664,0.584,0.657,0.249,0.441,1.0,0.589,0.332,1.0,1.0,1.0,1.0,0.59,0.681,0.36,0.321,0.318,0.148,0.105,0.391,0.098
NM_212663.929_959	..((...))..((((...........))))	...........(((........))).....	0.15,0.062,0.007,0.467,0.0,0.213,0.411,0.112,0.502,0.991,0.416,0.119,0.07,0.093,0.374,0.978,0.385,0.525,1.0,0.689,0.806,0.124,0.017,0.06,0.321,0.081,0.051,0.267,0.17,0.398	0.013,0.352,0.051,0.481,0.215,0.347,1.0,0.641,0.521,1.0,1.0,0.238,0.09,0.2,0.387,1.0,0.779,0.717,1.0,1.0,1.0,0.263,0.094,0.245,0.292,0.355,0.211,0.482,0.347,0.855
NM_212704.2599_2629	....(((((..............))).)).	..((...........)).............	0.285,0.157,0.06,0.077,0.0,0.0,0.565,0.092,0.601,0.889,0.277,0.092,0.237,0.478,0.335,0.025,0.0,0.569,0.397,0.195,0.44,0.0,0.23,0.077,0.269,0.07,0.233,0.469,0.047,0.105	0.581,0.25,0.055,0.051,0.108,0.209,0.852,0.314,0.727,1.0,0.764,0.233,0.229,1.0,0.71,0.55,0.328,0.732,0.613,0.203,1.0,0.331,0.186,0.232,0.056,0.293,0.323,0.719,0.104,0.266
NM_212745.624_654	.((((.....((........))...)))).	.((((((......))..........)))).	1.0,0.632,0.14,0.434,0.014,0.155,0.148,0.132,0.51,0.539,0.158,0.066,0.155,0.0,0.371,1.0,0.452,0.18,0.5,0.11,0.223,0.238,0.483,0.121,0.0,0.153,0.018,0.116,0.0,0.021	1.0,1.0,0.365,0.379,0.104,0.004,0.242,0.381,0.533,0.563,0.313,0.349,0.145,0.148,0.504,0.814,0.918,0.642,0.338,0.336,0.428,0.45,0.668,0.278,0.174,0.168,0.164,0.452,0.257,0.44
NM_212771.1091_1121	.(((..(((...........)))...))).	.(((......................))).	0.697,0.318,0.158,0.506,0.115,0.123,0.16,0.26,0.542,0.519,0.325,0.738,0.548,0.192,0.82,0.436,0.409,0.273,0.7,0.295,0.534,0.69,0.329,1.0,0.316,0.123,0.083,0.077,0.517,0.096	1.0,0.651,0.59,0.317,0.303,0.092,0.402,0.518,0.597,0.536,0.41,0.648,0.439,0.414,0.71,0.397,0.383,0.194,0.528,0.491,0.137,0.89,0.445,0.464,0.246,0.183,0.226,0.259,0.44,0.114
NM_212771.977_1007	....(((.(((.............))))))	.(((...)))....................	0.143,0.091,0.005,0.0,0.0,0.098,0.008,0.108,0.581,0.302,0.542,0.56,0.086,0.123,0.02,0.155,0.179,0.268,0.245,0.881,0.872,0.709,0.29,0.341,0.365,0.188,0.135,0.388,0.0,0.699	0.217,0.409,0.042,0.092,0.374,0.242,0.365,0.322,0.532,0.204,1.0,0.978,0.323,0.209,0.275,0.235,0.201,0.383,0.261,0.649,0.82,0.587,0.627,0.244,0.403,0.674,0.406,0.857,0.099,0.57
NM_212787.927_957	..((.((......)))).............	.............(((..........))).	0.068,0.238,0.07,0.861,0.125,0.142,0.193,0.039,0.766,0.824,0.14,0.563,0.617,0.06,0.322,0.128,0.242,0.233,0.072,0.695,0.68,0.17,0.085,0.559,0.102,0.223,0.054,0.073,0.028,0.014	0.108,0.654,0.199,0.748,0.295,0.392,0.519,0.191,0.782,0.638,0.076,0.331,1.0,0.148,0.423,0.239,0.305,0.735,0.28,0.441,0.288,0.396,0.227,0.955,0.233,0.284,0.044,0.128,0.032,0.0
NM_212867.2057_2087	.(((.(((......)))....)))......	...............(((.....)))....	0.231,0.49,0.34,1.0,0.263,0.15,0.288,0.616,0.199,0.474,0.198,0.41,0.555,0.19,0.0,0.097,0.193,0.145,0.268,0.158,0.226,0.016,0.128,0.0,0.048,0.363,0.364,0.102,0.737,0.102	0.782,1.0,0.638,0.972,0.607,0.54,0.298,1.0,0.576,0.344,0.68,0.422,0.743,0.399,0.236,0.237,0.568,0.436,0.195,0.326,0.294,0.091,0.187,0.097,0.057,0.237,0.494,0.143,0.507,0.194
NM_212880.1659_1689	.(((.((((........))))..)))....	..((...........))(((....)))...	0.496,0.308,0.192,0.331,0.355,0.453,0.352,0.751,0.487,0.3,0.353,0.868,1.0,0.154,0.379,0.161,0.03,0.189,0.036,0.091,0.436,0.343,0.407,0.408,0.414,0.568,0.386,0.547,0.356,0.184	0.721,0.715,0.471,0.264,0.621,0.48,0.657,1.0,0.537,0.278,0.439,1.0,1.0,0.51,0.332,0.271,0.243,0.148,0.161,0.279,0.371,0.491,0.61,0.378,0.424,0.572,0.165,0.515,0.427,0.334
NM_212947.1829_1859	.........(((((((....))))).))..	...........(((((....))))).....	0.297,0.0,0.0,0.0,0.0,0.032,0.0,0.0,0.079,0.029,0.085,0.0,0.0,0.021,0.0,0.015,0.054,0.028,0.082,0.638,0.913,0.025,0.034,0.021,0.154,0.203,0.195,0.051,0.118,0.0	0.334,0.0,0.034,0.013,0.034,0.08,0.08,0.132,0.156,0.166,0.342,0.067,0.0,0.035,0.106,0.0,0.331,0.012,0.402,0.45,0.417,0.119,0.175,0.014,0.0,0.412,0.255,0.218,0.105,0.193
NM_213053.2421_2451	(((............))).(((....))).	.(((...(((........)))..)))....	0.117,0.171,0.061,0.451,0.046,0.471,0.129,0.451,0.342,0.395,0.336,0.67,1.0,1.0,0.314,0.223,0.0,0.079,0.327,0.019,0.154,0.0,0.027,0.054,0.121,0.029,0.114,0.278,0.028,0.01	0.093,0.302,0.196,0.289,0.059,1.0,0.619,0.561,0.842,0.457,0.402,0.8,1.0,1.0,0.705,0.094,0.216,0.197,0.738,0.117,0.384,0.116,0.08,0.086,0.128,0.092,0.183,0.354,0.1,0.11
NM_213062.3641_3671	(((...((........)).....)))....	..............................	0.127,0.211,0.139,0.612,0.28,0.055,0.58,0.32,0.353,0.108,0.242,0.149,0.336,0.327,0.11,0.277,0.529,0.446,0.151,0.202,0.369,0.118,0.185,0.109,0.127,0.53,1.0,0.849,0.475,1.0	0.335,0.508,0.433,0.845,0.576,0.153,0.496,0.343,0.522,0.295,0.502,0.36,0.368,0.331,0.237,0.682,0.846,0.275,0.19,0.148,0.504,0.352,0.278,0.416,0.298,0.567,0.848,1.0,0.504,1.0
NM_213110.1418_1448	.(((...))).(((.(((....))).))).	.......((...............))....	0.17,0.529,0.247,0.378,0.281,0.0,0.013,0.0,0.0,0.71,0.172,0.142,0.316,0.127,0.0,0.29,0.271,0.0,0.185,0.257,0.285,0.718,0.211,0.323,0.097,0.12,0.399,0.864,0.467,1.0	0.397,0.627,0.427,0.334,0.442,0.125,0.236,0.128,0.258,0.493,0.4,0.222,0.674,0.075,0.134,0.223,0.368,0.321,0.169,0.239,0.617,0.734,0.816,0.483,0.308,0.135,0.48,0.66,0.588,1.0
NM_213143.2181_2211	(((....((....))........)))....	.......((....))...............	0.234,0.403,0.123,0.829,0.351,0.121,0.223,0.031,0.42,0.082,0.127,0.0,0.185,0.162,0.016,0.477,0.433,0.968,0.667,0.047,0.159,0.39,0.071,0.207,0.259,0.629,0.232,0.397,0.0,0.068	0.336,0.924,0.24,0.635,0.657,0.235,0.323,0.328,0.314,0.18,0.391,0.289,0.491,0.482,0.322,0.284,1.0,1.0,1.0,0.665,0.321,0.926,0.177,0.627,0.361,0.833,0.776,0.486,0.166,0.397
NM_213163.2144_2174	(((....(((((.........))))).)))	...((..(((((.........)))))..))	0.459,0.2,0.17,0.242,0.129,0.18,0.241,0.2,0.046,0.0,0.214,0.427,0.12,0.411,0.377,0.109,0.303,0.148,0.758,0.204,0.311,0.201,0.139,0.021,0.127,0.062,0.0,0.0,0.056,0.0	0.554,0.594,0.232,0.234,0.236,0.205,0.189,0.113,0.125,0.197,0.347,0.588,0.2,0.484,0.726,0.173,0.95,0.357,0.456,0.483,0.359,0.197,0.103,0.087,0.0,0.116,0.097,0.023,0.026,0.0
NM_213180.1410_1440	(((((........)))))............	.((((........)))).............	0.311,0.178,0.083,0.189,0.047,0.18,0.222,0.338,0.352,1.0,0.109,0.538,0.11,0.199,0.16,0.226,0.377,0.147,0.33,0.111,0.117,0.359,0.806,0.189,0.189,0.211,0.523,0.071,0.506,0.292	0.633,0.331,0.207,0.17,0.215,0.238,0.156,0.517,0.461,0.954,0.333,0.327,0.324,0.367,0.198,0.281,0.583,0.44,0.315,0.269,0.327,0.516,0.95,0.334,0.29,0.242,0.461,0.04,0.515,0.412
NM_213216.1184_1214	((((..((.....((...))....))))))	((((......................))))	0.028,0.011,0.021,0.133,0.0,0.008,0.038,0.029,0.0,0.167,0.0,0.055,0.101,0.248,0.162,0.1,0.204,0.701,0.285,0.461,0.294,0.473,0.141,0.272,0.068,0.069,0.029,0.02,0.003,0.056	0.025,0.091,0.102,0.128,0.248,0.071,0.0,0.19,0.049,0.173,0.0,0.242,0.215,0.37,0.282,0.262,0.248,0.477,0.271,0.39,0.413,0.545,0.161,0.409,0.094,0.137,0.129,0.09,0.024,0.001
NM_213228.1485_1515	..((..(((((....)))))..))......	..((...((((....)))))).........	0.266,0.322,0.058,0.224,0.181,0.174,0.124,0.202,0.043,0.137,0.195,0.066,0.16,0.106,0.005,0.083,0.011,0.05,0.0,0.009,0.093,0.094,0.211,0.182,0.263,0.771,0.067,0.265,0.159,1.0	0.401,0.827,0.169,0.37,0.43,0.265,0.519,0.236,0.041,0.133,0.105,0.109,0.256,0.287,0.115,0.0,0.157,0.005,0.277,0.016,0.156,0.334,0.275,0.202,0.662,0.333,0.294,0.181,0.294,1.0
NM_213290.2242_2272	((((....))))..................	.....((....)).................	0.605,0.327,0.0,0.179,0.0,0.0,0.051,0.289,0.097,0.097,0.0,0.244,0.105,0.072,0.438,0.015,0.315,0.0,0.354,0.032,0.033,0.085,0.12,0.0,0.0,0.0,0.0,0.235,0.251,0.215	1.0,0.884,0.233,0.292,0.336,0.219,0.179,0.547,0.22,0.541,0.237,0.819,0.503,0.318,0.654,0.239,0.644,0.084,0.384,0.022,0.062,0.028,0.034,0.006,0.102,0.015,0.083,0.158,0.272,0.348
NM_213317.1345_1375	..((.((((((........))...))))))	.........(((.((((.....)))).)))	0.02,0.003,0.0,0.022,0.013,0.185,0.145,0.058,0.002,0.003,0.0,0.0,0.0,0.167,0.248,0.364,0.319,0.023,0.072,0.245,0.211,0.37,0.468,0.278,0.233,0.204,0.062,0.2,0.233,0.394	0.019,0.093,0.054,0.0,0.0,0.118,0.147,0.152,0.042,0.037,0.0,0.0,0.0,0.0,0.384,0.39,0.062,0.136,0.087,0.232,0.188,0.475,0.379,0.209,0.27,0.262,0.174,0.32,0.223,0.417
NM_213350.1110_1140	....(((..(((..((....)))))..)))	...............((((...))))....	0.311,0.151,0.023,0.279,0.0,0.134,0.042,0.16,0.105,0.062,0.166,0.92,0.752,0.237,0.3,0.127,0.0,0.117,0.148,0.083,0.005,0.0,0.0,0.0,0.0,0.036,0.261,1.0,0.244,1.0	0.586,0.445,0.044,0.278,0.005,0.279,0.099,0.103,0.162,0.271,0.334,0.74,1.0,0.549,0.405,0.097,0.044,0.057,0.032,0.0,0.011,0.0,0.0,0.0,0.0,0.022,0.327,0.576,0.272,0.851
NM_213355.2545_2575	(((((...))))).................	((((.....)))).................	0.021,0.012,0.036,0.163,0.107,0.092,0.051,0.231,0.246,0.005,0.0,0.029,0.0,0.208,0.074,0.212,0.254,0.59,1.0,0.278,0.268,0.529,1.0,0.077,0.241,0.284,0.481,1.0,0.623,0.576	0.151,0.078,0.014,0.386,0.263,0.259,0.445,0.387,0.301,0.02,0.058,0.0,0.021,0.197,0.208,0.17,0.118,0.566,1.0,0.625,0.516,0.596,0.828,0.402,0.274,0.604,0.898,1.0,0.774,0.835
NM_213358.2572_2602	..(((.....)))((((.......))))..	..(((.....))).................	0.158,0.169,0.105,0.148,0.202,0.181,0.254,0.249,0.185,0.046,0.038,0.0,0.352,0.279,0.358,0.519,0.696,0.119,0.761,1.0,1.0,0.321,0.329,0.285,0.457,0.357,0.088,0.941,0.632,1.0	0.139,0.339,0.111,0.086,0.33,0.094,0.011,0.358,0.205,0.482,0.627,0.109,0.371,0.393,0.494,0.587,0.68,0.475,1.0,1.0,1.0,0.763,0.417,0.422,0.444,0.441,0.339,0.79,0.629,1.0
NM_213358.3350_3380	.......((((((....)))))).......	........(((((....)))))........	0.101,0.074,0.014,0.053,0.253,0.098,0.35,0.375,0.0,0.162,0.259,0.357,0.37,0.477,0.96,1.0,0.242,0.157,0.073,0.16,0.548,0.656,1.0,0.253,0.477,0.596,0.248,0.645,0.495,0.3	0.339,0.566,0.139,0.009,0.0,0.167,0.314,0.576,0.354,0.195,0.438,0.737,0.753,1.0,1.0,0.645,0.468,0.331,0.321,0.174,0.678,0.788,1.0,0.911,0.762,0.912,0.096,0.721,0.352,0.75
NM_213368.1125_1155	.......(((((((((....))))))))).	.....(((((...)))))............	0.946,0.263,0.582,0.724,0.346,0.252,0.164,1.0,0.508,0.145,0.117,0.0,0.141,0.211,0.1,0.21,0.141,0.511,0.085,0.063,0.316,0.565,0.526,0.124,0.375,0.907,1.0,0.272,0.205,1.0	0.973,1.0,1.0,0.823,0.976,0.606,0.663,1.0,0.44,0.349,0.541,0.193,0.153,0.039,0.132,0.168,0.164,0.39,0.182,0.102,0.473,0.629,0.445,0.384,0.428,1.0,1.0,0.685,0.388,0.685
NM_213378.1101_1131	.......((((.....)))).((....)).	..............................	0.149,0.179,0.146,0.529,0.343,0.094,0.211,0.219,0.607,1.0,0.19,0.849,0.261,0.297,0.0,0.069,0.226,0.113,0.185,0.0,0.145,0.144,0.402,0.098,0.004,0.03,0.188,0.124,0.439,0.73	0.2,0.638,0.393,0.334,1.0,0.353,0.548,0.343,0.653,1.0,0.399,0.993,0.424,0.0,0.475,0.072,0.44,0.336,0.294,0.0,0.28,0.156,0.77,0.1,0.35,0.291,0.635,0.6,0.202,1.0
NM_213420.1678_1708	..............................	..(((............)))..........	0.139,0.148,0.173,0.345,0.189,0.337,0.25,0.037,0.436,0.432,0.805,0.214,0.276,0.168,0.047,0.126,0.082,0.227,0.191,0.453,0.942,0.611,0.714,0.551,0.383,0.444,0.22,0.416,0.197,0.32	0.121,0.289,0.064,0.142,0.174,0.209,0.17,0.0,0.177,0.453,0.439,0.234,0.125,0.034,0.0,0.072,0.207,0.281,0.231,0.305,0.59,0.457,0.506,0.53,0.135,0.145,0.261,0.188,0.144,0.0
NM_213420.2522_2552	.((((........((((...))))))))..	.(((........(((((...))))))))..	0.381,0.134,0.076,0.317,0.027,0.999,0.472,0.536,0.232,0.157,0.719,0.73,0.296,0.067,0.112,0.117,0.417,0.081,0.111,0.358,0.281,0.055,0.112,0.103,0.061,0.018,0.156,0.185,0.431,0.287	0.732,0.455,0.169,0.385,0.09,0.682,0.303,0.431,0.365,0.216,0.85,1.0,0.361,0.037,0.099,0.287,0.372,0.28,0.232,0.56,0.46,0.202,0.174,0.1,0.072,0.076,0.255,0.422,0.506,0.281
NM_213424.3020_3050	...........((((((....))))...))	.............((((....)))).....	0.204,0.222,0.015,0.371,0.0,0.561,0.247,0.682,0.874,0.617,0.222,0.479,0.114,0.0,0.053,0.586,0.253,0.092,1.0,0.395,0.419,0.127,0.0,0.131,0.092,0.107,0.451,0.0,0.043,0.189	0.203,0.265,0.168,0.251,0.074,0.174,0.26,0.56,0.751,0.868,0.446,0.581,0.212,0.053,0.219,0.522,0.62,0.119,1.0,0.454,0.259,0.135,0.148,0.08,0.174,0.235,0.271,0.138,0.078,0.19
NM_213475.2083_2113	...(((....)))....((.....))....	.(((.((.........))))).........	0.168,0.198,0.144,0.809,0.116,0.381,0.218,0.037,0.367,0.34,0.119,0.061,0.374,0.527,0.07,0.177,0.05,0.102,0.018,0.621,0.168,0.186,0.956,0.691,0.016,0.208,0.237,0.985,0.059,0.818	0.43,0.806,0.27,0.353,0.297,0.239,0.598,0.33,0.525,0.599,0.55,0.365,0.655,0.327,0.078,0.415,0.154,0.287,0.258,0.095,0.257,0.497,1.0,1.0,0.268,0.524,0.104,1.0,0.629,0.556
NM_213481.2488_2518	.((((((((..........))).)..))))	.((((((((..........)).))..))))	0.396,0.193,0.159,0.536,0.095,0.54,0.294,0.186,0.08,0.094,0.326,0.342,0.697,0.387,0.768,1.0,0.142,0.57,0.128,0.298,0.176,0.161,0.122,0.044,-1,-1,-1,-1,-1,-1	0.547,0.379,0.278,0.185,0.223,0.377,0.453,0.254,0.068,0.185,0.224,0.28,0.484,0.443,0.895,0.776,0.292,0.451,0.096,0.194,0.154,0.142,0.144,0.088,-1,-1,-1,-1,-1,-1
NM_213500.1463_1493	(((....((((...))))......)))...	(((....(((.....)))......)))...	0.036,0.106,0.097,0.4,0.01,0.147,0.2,0.166,0.168,0.622,0.441,0.472,0.557,0.51,0.31,0.265,0.624,0.498,0.658,0.641,0.57,0.165,0.434,0.112,0.134,0.034,0.163,0.436,0.832,0.145	0.113,0.256,0.254,0.114,0.103,0.192,0.507,0.203,0.216,0.672,0.586,0.714,0.543,0.81,0.572,0.667,0.705,0.544,0.868,0.468,0.938,0.257,0.319,0.355,0.242,0.111,0.394,0.293,0.903,0.508
NM_213520.2522_2552	((((.....))))..(((......)))...	..((.....))(((.(((......))))))	0.199,0.42,0.09,0.587,0.142,0.231,0.08,0.0,0.015,0.022,0.039,0.0,0.195,0.064,0.138,0.265,0.072,0.062,0.192,0.075,0.074,0.144,0.107,0.326,0.104,0.241,0.126,0.077,0.251,0.228	0.533,0.762,0.523,0.568,0.204,0.161,0.283,0.152,0.0,0.047,0.055,0.221,0.163,0.229,0.253,0.046,0.125,0.099,0.143,0.152,0.152,0.259,0.0,0.268,0.0,0.0,0.165,0.03,0.358,0.162
NM_213522.1618_1648	..(((((.............))))).....	.......((((((....))..)))).....	0.472,0.07,0.152,0.958,0.149,0.268,0.867,0.414,0.152,0.379,0.379,0.301,0.248,0.064,0.479,0.625,0.78,0.556,1.0,0.441,0.763,0.083,0.032,0.003,0.307,0.039,0.141,0.831,0.81,0.867	0.797,0.758,0.379,0.15,0.151,0.764,1.0,0.522,0.452,0.0,0.465,0.047,0.0,0.155,0.398,0.75,0.679,0.64,1.0,0.911,0.817,0.097,0.0,0.025,0.0,0.032,0.309,0.581,0.615,0.593
NM_213538.1220_1250	((((...((...))...)))).........	..((..((.((......)).))..))....	0.159,0.093,0.101,1.0,0.0,0.054,0.017,0.133,0.53,0.805,0.306,0.185,0.173,0.188,0.159,0.115,0.05,0.143,0.372,0.056,0.068,0.38,0.0,0.263,0.121,0.007,0.0,0.004,0.059,0.319	0.452,0.402,0.401,0.917,0.555,0.293,0.215,0.698,0.627,0.884,0.374,0.697,0.663,0.434,0.075,0.372,0.459,0.049,0.241,0.309,0.454,0.135,0.277,0.262,0.129,0.103,0.002,0.032,0.102,0.0
NM_214760.1149_1179	(((....((((...)).))......)))..	(((.......((.....))......)))..	0.137,0.342,0.015,0.432,0.0,0.065,0.323,0.124,0.16,0.145,0.0,0.352,0.083,0.0,0.202,0.003,0.075,0.098,0.444,0.151,0.454,0.094,0.537,0.274,0.28,0.003,0.201,0.402,0.263,0.415	0.252,0.468,0.109,0.168,0.209,0.501,0.551,0.33,0.452,0.124,0.184,0.187,0.363,0.269,0.187,0.212,0.229,0.098,0.59,0.36,0.044,0.369,0.589,0.567,0.305,0.165,0.325,0.353,0.386,0.205
NM_214769.2394_2424	..((....(((((......)))))....))	..((((............))))........	0.487,0.653,0.095,0.296,0.084,0.277,0.93,0.939,0.369,0.499,0.172,0.258,0.911,0.64,0.227,0.705,0.069,0.227,0.059,0.158,0.086,0.094,0.238,0.082,0.337,0.106,0.108,0.216,0.068,0.015	0.764,1.0,0.241,0.273,0.346,0.301,0.713,0.838,0.377,0.821,0.471,0.477,0.872,0.855,0.521,0.349,0.282,0.358,0.205,0.103,0.119,0.01,0.375,0.232,0.121,0.215,0.161,0.279,0.07,0.096
NM_214772.2841_2871	..........(((((..........)))))	..(((........))).((((...))))..	0.167,0.139,0.022,0.252,0.099,0.219,0.543,0.52,0.175,1.0,0.106,0.158,0.027,0.243,0.094,0.24,0.028,0.079,0.392,0.352,0.672,0.991,0.51,0.962,0.649,0.128,0.031,0.064,0.178,0.194	0.567,0.66,0.23,0.008,0.269,0.132,0.65,0.97,0.286,1.0,0.215,0.357,0.098,0.364,0.254,0.284,0.157,0.107,0.451,0.213,0.7,0.673,0.376,0.505,0.817,0.14,0.164,0.213,0.184,0.258
NM_214780.673_703	..(((((....))).)).............	..(((((....)).))).............	0.215,0.375,0.0,0.253,0.0,0.083,0.035,0.074,0.167,0.161,0.03,0.003,0.163,0.085,0.246,0.101,0.231,0.014,0.185,0.208,0.538,0.3,0.082,0.129,0.122,0.492,0.367,0.329,0.739,0.681	0.484,0.699,0.165,0.023,0.051,0.236,0.018,0.41,0.318,0.67,0.158,0.186,0.241,0.332,0.445,0.234,0.157,0.338,0.22,0.308,0.256,0.59,0.254,0.195,0.229,0.626,0.399,0.447,0.597,0.721

## Sheet: cell1_cell4
transcript.start_end	dot(cell1)	dot(cell4)	shape(cell1)	shape(cell4)
NM_001001818.1692_1722	..(((..............)))........	.(((...........))).(((.....)))	0.027,0.042,0.037,0.0,0.024,0.252,0.159,0.548,0.364,0.0,0.0,0.202,0.722,0.781,0.286,0.873,0.509,0.432,0.596,0.198,0.306,0.985,1.0,0.329,0.881,0.525,0.519,0.747,0.233,0.139	0.116,0.047,0.0,0.0,0.068,0.067,0.292,0.392,0.249,0.043,0.003,0.16,0.402,0.337,0.161,1.0,0.047,0.309,0.218,0.192,0.253,0.802,0.621,0.414,1.0,0.311,0.312,0.265,0.03,0.072
NM_001001840.3027_3057	..............................	........((.......))...........	0.073,0.111,0.298,0.123,0.215,0.179,0.0,0.55,0.115,0.171,0.361,0.56,0.7,0.081,0.711,0.952,0.174,0.411,0.958,0.757,0.528,0.77,1.0,1.0,0.537,1.0,0.61,0.383,0.616,0.47	0.0,0.101,0.045,0.0,0.37,0.012,0.0,0.044,0.0,0.0,0.12,0.02,0.204,0.0,0.423,0.664,0.119,0.293,0.842,0.357,0.583,0.76,0.659,1.0,0.684,0.902,0.251,0.41,0.333,0.266
NM_001001840.3260_3290	...(((.((((((.......))).))))))	.....((((((((.......))).).))))	1.0,1.0,0.599,0.074,0.0,0.043,0.0,0.081,0.345,0.075,0.102,0.171,0.451,0.84,0.309,0.519,0.159,0.643,0.709,0.602,0.337,0.114,0.395,0.301,0.343,0.634,0.249,0.565,0.151,0.314	0.787,0.834,0.097,0.136,0.188,0.0,0.0,0.032,0.059,0.0,0.0,0.131,0.238,0.632,0.107,0.027,0.146,0.367,0.866,1.0,0.16,0.277,0.128,0.269,0.378,0.759,0.09,0.45,0.35,0.434
NM_001002099.1051_1081	...((((..............)).))....	((.((((..............)).)).)).	0.808,0.681,1.0,0.488,0.587,0.414,0.441,0.715,0.955,1.0,1.0,0.57,0.763,0.632,0.438,0.426,0.005,0.585,1.0,1.0,1.0,0.177,0.049,0.155,0.065,0.068,0.011,0.03,0.205,0.136	0.374,0.391,0.837,0.471,0.836,0.194,0.385,0.658,0.843,1.0,0.479,0.311,0.912,0.371,0.282,0.606,0.067,0.76,1.0,1.0,1.0,0.037,0.0,0.097,0.027,0.079,0.0,0.0,0.0,0.079
NM_001002108.779_809	......(((.......)))...........	((((..(((.......))).....))))..	0.58,0.411,1.0,0.413,0.671,0.152,0.285,0.393,0.549,0.397,0.496,0.105,0.482,0.772,0.95,0.36,0.422,0.081,0.222,0.546,0.323,0.875,0.65,0.389,0.381,0.968,0.098,0.118,0.096,0.452	0.526,0.38,0.141,0.3,0.752,0.0,0.267,0.064,0.187,0.183,0.136,0.156,0.356,0.41,1.0,0.336,0.099,0.056,0.016,0.717,0.448,0.605,0.643,0.216,0.194,0.266,0.058,0.228,0.237,0.819
NM_001002130.1396_1426	..(((((((..........)))).)))...	..((((.((((........))))))))...	0.449,0.74,0.282,0.108,0.076,0.096,0.0,0.274,0.0,0.623,0.198,0.628,0.277,0.039,0.249,0.354,0.461,0.366,0.229,0.358,0.473,0.0,0.437,0.264,0.094,0.342,0.57,0.23,0.202,0.135	0.385,1.0,0.118,0.0,0.08,0.0,0.0,0.216,0.0,0.449,0.27,0.428,0.077,0.0,0.193,0.0,0.443,0.0,0.285,0.181,0.157,0.0,0.085,0.033,0.111,0.632,0.348,0.35,0.012,0.006
NM_001002165.1990_2020	.......(((((......))..))).....	.((....(((((......))..)))...))	0.533,0.201,0.778,0.176,0.223,0.253,0.216,0.239,0.252,0.285,0.369,0.096,0.784,1.0,1.0,0.428,0.446,0.636,0.617,1.0,0.585,0.171,0.174,0.157,0.111,0.201,0.678,0.6,0.09,0.0	0.328,0.237,0.15,0.059,0.338,0.009,0.194,0.085,0.265,0.304,0.022,0.124,0.458,1.0,1.0,0.39,0.474,0.207,0.959,1.0,0.215,0.0,0.055,0.0,0.028,0.106,0.683,0.361,0.017,0.0
NM_001002211.1129_1159	((((.....)))).................	((((.....))))...(((........)))	0.09,0.156,0.227,0.063,0.153,0.504,0.066,0.479,0.327,0.01,0.119,0.423,0.354,0.132,0.505,0.363,0.257,0.28,0.073,0.073,0.146,0.31,0.228,0.19,0.196,0.064,0.083,0.464,0.41,0.114	0.023,0.099,0.138,0.0,0.261,0.251,0.203,0.466,0.307,0.0,0.0,0.075,0.31,0.09,0.419,0.041,0.007,0.165,0.0,0.0,0.037,0.142,0.0,0.0,0.119,0.356,0.104,0.372,0.243,0.002
NM_001002364.945_975	...((((......)))).............	....((((......))))............	0.457,-1,-1,-1,-1,0.186,0.373,0.34,0.68,0.451,0.307,0.291,0.269,0.188,0.006,0.385,0.981,0.215,0.682,0.661,0.466,0.315,0.484,0.896,0.261,0.526,0.268,0.255,0.356,0.364	0.15,0.249,0.267,0.0,0.507,0.083,0.138,0.0,0.3,0.265,0.256,0.158,0.096,0.236,0.205,0.1,0.631,0.342,0.903,0.483,0.551,0.36,0.232,0.595,0.212,0.0,0.118,0.626,0.348,0.318
NM_001002551.990_1020	..(((((.........).))))........	..((((.(((.....)))))))........	0.512,0.468,0.524,0.096,0.062,0.253,0.333,0.206,0.077,0.351,0.618,0.529,0.891,0.737,0.302,0.904,0.591,0.423,0.317,0.213,0.284,0.354,1.0,0.497,0.921,0.852,1.0,0.447,0.786,0.331	0.066,0.098,0.305,0.036,0.121,0.0,0.261,0.132,0.112,0.197,0.272,0.454,0.814,0.493,0.275,0.648,0.234,0.26,0.321,0.306,0.263,0.608,1.0,0.294,1.0,0.839,0.824,0.597,1.0,0.52
NM_001002575.767_797	........(((((.....))))).......	.(((.((.(((((.....))))))))))..	0.437,1.0,1.0,0.54,1.0,0.361,0.506,0.469,0.279,0.449,0.547,0.297,0.352,1.0,0.791,0.931,1.0,1.0,0.613,1.0,0.399,0.306,0.765,0.492,0.724,0.361,0.578,1.0,0.349,0.361	0.197,0.476,0.682,0.417,0.808,0.159,0.207,0.069,0.296,0.058,0.227,0.125,0.0,0.946,0.555,0.613,0.774,1.0,0.153,0.606,0.459,0.058,0.321,0.388,0.075,0.202,0.108,0.437,0.227,0.164
NM_001002578.1106_1136	..............................	....((((.......)).)).((.....))	0.48,0.587,0.38,0.125,0.131,0.217,0.269,0.221,0.292,0.671,0.206,0.342,0.493,0.533,0.82,0.377,0.523,0.768,0.74,0.784,0.897,0.605,0.553,0.516,0.85,0.699,0.705,0.729,0.52,0.281	0.587,0.215,0.254,0.031,0.07,0.115,0.101,0.095,0.365,0.45,0.283,0.167,0.32,0.186,0.335,0.216,0.433,0.407,0.347,0.853,0.634,0.262,0.288,0.549,0.243,0.373,1.0,0.914,0.246,0.133
NM_001002613.1315_1345	((((.....((...))....))))......	((((...)))).((((......))))....	0.211,0.086,0.222,0.261,0.394,0.256,0.043,0.296,0.511,0.079,0.072,0.228,0.75,0.724,0.305,0.51,0.788,0.685,0.48,0.136,0.272,0.184,0.051,0.128,0.66,0.459,0.431,0.27,0.508,0.09	0.071,0.068,0.195,0.0,0.294,0.101,0.138,0.249,0.155,0.0,0.126,0.0,0.178,0.235,0.125,0.192,1.0,0.771,0.621,0.129,0.0,0.059,0.0,0.089,0.458,0.605,0.205,0.263,0.234,0.002
NM_001002618.1196_1226	....(((...((......))......))).	....((((((((......))..))).))).	0.638,0.695,0.961,0.429,0.241,0.298,0.404,0.671,0.333,0.697,0.124,0.244,0.34,0.538,1.0,0.195,0.409,0.408,0.824,0.544,0.42,0.564,0.856,0.14,0.933,0.577,0.212,0.2,0.236,0.691	0.237,0.479,0.227,0.257,0.415,0.155,0.154,0.652,0.129,0.246,0.045,0.072,0.019,0.572,0.649,0.187,0.116,0.187,0.699,0.871,0.488,0.813,0.419,0.401,0.445,0.487,0.22,0.139,0.044,0.553
NM_001002630.1568_1598	......((((.........)))).......	.........(((((((.......)))))))	0.743,0.39,0.421,0.168,0.269,0.168,0.124,0.115,0.105,0.139,0.385,0.339,0.165,0.263,0.29,0.448,0.744,0.062,0.392,0.402,0.036,0.202,0.136,0.301,0.416,0.523,0.316,0.434,0.564,0.128	0.238,0.336,0.0,0.0,0.287,0.24,0.077,0.002,0.045,0.048,0.0,0.0,0.08,0.084,0.306,0.255,0.465,0.0,0.175,0.207,0.019,0.114,0.085,0.211,0.121,0.684,0.074,0.16,0.361,0.346
NM_001002676.1732_1762	..............................	..((.((........)).))..........	0.344,0.265,0.555,0.106,0.227,0.298,0.171,0.421,0.564,0.102,1.0,0.591,0.975,0.393,0.466,0.692,0.567,0.429,0.466,1.0,0.233,1.0,1.0,0.53,0.314,0.356,0.454,0.577,0.308,0.571	0.187,0.187,0.323,0.018,0.034,0.007,0.127,0.0,0.191,0.082,0.655,0.25,0.572,0.046,0.161,0.172,0.133,0.047,0.457,0.614,0.19,0.816,0.833,0.121,0.065,0.238,0.373,0.449,0.057,0.077
NM_001002711.574_604	((((((.((...))))))))..........	((((((........))))))..........	0.374,0.08,0.8,0.144,0.126,0.046,0.139,0.014,0.046,0.489,0.849,0.591,0.536,0.519,0.361,0.075,0.229,0.612,0.311,0.398,0.151,0.851,0.075,1.0,0.571,0.776,0.473,1.0,0.764,0.422	0.0,0.0,0.485,0.026,0.034,0.0,0.0,0.166,0.096,0.662,1.0,0.389,0.769,0.188,0.25,0.164,0.407,0.529,0.67,0.663,0.597,0.736,0.413,1.0,0.58,0.511,0.341,1.0,0.662,0.474
NM_001002743.972_1002	..........(((.((((...)))).))).	((((....))))..((((...)))).....	0.259,0.5,0.479,0.439,0.46,0.324,0.287,0.149,0.0,0.371,0.451,0.318,0.321,0.294,0.622,0.176,0.212,0.358,0.457,0.248,0.0,0.258,0.191,0.147,0.513,0.447,0.572,0.246,0.553,0.224	0.0,0.224,0.273,0.285,0.144,0.026,0.082,0.13,0.032,0.241,0.162,0.153,0.208,0.047,0.224,0.173,0.086,0.345,0.312,0.155,0.084,0.216,0.171,0.271,0.138,0.315,0.805,0.367,0.609,0.247
NM_001003619.1662_1692	.....................(((...)))	..............((((((....))))))	0.392,0.352,1.0,0.461,0.28,0.791,0.279,0.35,1.0,0.529,0.651,0.511,0.268,0.367,0.418,0.58,0.487,0.297,1.0,0.519,0.438,0.206,0.274,0.56,0.479,0.751,1.0,0.561,0.223,0.16	0.39,0.16,0.39,0.029,0.279,0.229,0.166,0.358,0.947,0.221,0.153,0.443,0.039,0.211,0.146,0.299,0.134,0.21,0.507,0.167,0.165,0.073,0.097,0.306,0.639,0.561,0.634,0.313,0.037,0.15
NM_001003648.2061_2091	...(((((..(((.....)))...))))).	...((((((.(((.....))).)).)))).	0.69,0.257,0.41,0.258,0.303,0.031,0.293,0.377,0.202,0.221,0.555,0.4,0.052,0.131,0.211,0.0,0.054,0.052,0.3,0.218,0.142,0.394,0.075,0.158,0.037,0.418,0.68,0.229,0.728,0.139	0.32,0.175,0.102,0.139,0.425,0.083,0.312,0.279,0.14,0.185,0.539,0.262,0.114,0.057,0.255,0.283,0.031,0.003,0.188,0.124,0.008,0.179,0.16,0.038,0.12,0.343,0.307,0.182,0.43,0.313
NM_001003746.1702_1732	................(((........)))	.(((.....)))....(((........)))	0.446,0.639,0.728,0.318,0.792,1.0,0.072,0.645,0.198,0.713,0.113,0.676,0.048,0.17,0.312,0.528,0.313,0.134,0.076,0.506,0.424,0.402,0.544,0.545,0.786,0.211,0.467,0.775,0.124,0.0	0.336,0.364,0.671,0.206,0.255,0.314,0.054,0.237,0.09,0.0,0.0,0.125,0.077,0.0,0.0,0.107,0.0,0.056,0.0,0.056,0.282,0.107,0.0,0.187,0.393,0.274,0.244,0.181,0.045,0.065
NM_001003752.1489_1519	((......))....................	...((....(((..........))).))..	0.002,0.18,0.509,0.401,0.454,0.02,0.282,0.0,0.062,0.453,0.13,0.189,0.27,0.274,0.0,0.0,0.289,0.43,0.313,0.521,0.102,0.646,0.266,0.427,0.133,0.046,0.139,0.366,0.429,0.479	0.0,0.057,0.0,0.131,0.046,0.0,0.144,0.005,0.091,0.192,0.0,0.0,0.038,0.0,0.031,0.137,0.001,0.38,0.501,0.363,0.178,0.674,0.633,0.198,0.235,0.237,0.089,0.289,0.392,0.488
NM_001003758.1269_1299	((((....))))..................	((((....))))..(((((...)))))...	0.388,0.246,0.183,0.0,0.153,0.054,0.073,0.142,0.0,0.218,0.074,0.368,0.215,0.14,0.424,0.432,0.0,0.32,0.147,0.792,0.651,0.247,0.59,0.613,0.129,1.0,0.252,0.376,0.27,0.423	0.118,0.032,0.127,0.02,0.162,0.028,0.055,0.013,0.0,0.037,0.064,0.231,0.015,0.147,0.15,0.197,0.047,0.081,0.199,0.613,0.169,0.287,0.585,0.409,0.115,1.0,0.258,0.181,0.124,0.383
NM_001003863.2211_2241	..............................	..........(((....)))..........	0.437,0.314,0.644,0.17,0.225,0.432,0.012,0.153,0.065,0.156,0.407,0.0,0.886,0.72,0.417,0.404,0.475,0.4,0.372,0.448,0.758,0.376,0.078,0.174,0.065,0.08,0.019,0.0,0.031,0.0	0.187,0.214,0.271,0.115,0.157,0.112,0.004,0.062,0.0,0.01,0.082,0.063,0.492,0.442,0.21,0.27,0.309,0.223,0.38,0.389,0.595,0.213,0.162,0.031,0.079,0.119,0.038,0.006,0.01,0.031
NM_001003999.1752_1782	.......(((((((.......)))))))..	.......((((((((.....))))))))..	1.0,0.824,1.0,0.66,0.575,0.228,0.313,0.458,0.439,0.172,0.426,0.154,0.068,0.46,0.162,0.553,0.346,0.313,0.306,0.78,1.0,0.957,0.487,0.406,0.307,0.5,0.249,0.101,0.278,0.461	1.0,0.906,1.0,0.359,0.176,0.054,0.209,0.142,0.212,0.189,0.318,0.0,0.144,0.304,0.0,0.492,0.242,0.202,0.0,0.412,0.969,0.993,0.091,0.134,0.284,0.186,0.037,0.593,0.119,0.557
NM_001004533.1943_1973	..(((..(((.......))).)))......	.........((((((....)))))).....	0.93,0.978,0.698,0.337,0.226,0.191,0.602,0.224,0.102,0.081,0.229,0.371,0.352,0.518,0.25,0.144,0.342,0.0,0.559,0.216,0.256,0.145,0.097,0.306,0.357,0.238,0.455,0.392,0.53,0.491	0.984,0.918,0.538,0.061,0.351,0.106,0.64,0.127,0.035,0.038,0.163,0.12,0.465,0.45,0.191,0.14,0.113,0.102,0.161,0.214,0.111,0.0,0.069,0.28,0.278,0.554,0.473,0.552,0.141,0.288
NM_001004579.1930_1960	.....((.((((...)))).))........	..(((...((((...)))).))).......	0.292,0.299,0.894,0.34,0.13,0.131,0.186,0.165,0.0,1.0,0.226,0.223,0.565,0.374,0.51,0.549,0.904,0.385,0.288,0.323,0.218,0.127,1.0,0.567,0.606,0.6,1.0,0.663,0.464,0.322	-1,-1,-1,-1,-1,-1,-1,0.19,0.052,0.951,0.271,0.0,0.0,0.181,0.111,0.653,0.605,0.247,0.103,0.193,0.138,0.114,0.223,0.602,0.389,0.273,1.0,0.847,0.093,0.138
NM_001004665.636_666	...........(((...........)))..	.(((......))).(((.......)))...	1.0,1.0,0.991,0.155,0.53,0.237,0.664,0.936,1.0,0.498,0.026,0.338,0.442,0.067,0.323,0.342,0.468,0.0,0.622,0.673,0.813,0.005,0.577,0.585,0.716,0.287,0.194,0.339,0.61,1.0	0.856,0.77,0.436,0.0,0.6,0.037,0.155,1.0,1.0,0.132,0.0,0.071,0.13,0.174,0.0,0.12,0.124,0.062,0.296,0.635,0.846,0.061,1.0,0.032,0.068,0.226,0.454,0.421,0.692,0.653
NM_001004667.952_982	...(((((........))))).........	...(((((.(((...)))))))).......	0.697,0.722,0.756,0.254,0.0,0.128,0.304,0.146,0.087,0.161,0.121,0.189,0.863,0.592,0.26,0.159,0.259,0.401,0.222,0.335,0.215,0.771,1.0,0.629,0.622,0.456,0.985,0.196,0.905,0.553	0.834,0.625,0.399,0.216,0.145,0.0,0.507,0.19,0.02,0.144,0.058,0.089,0.717,0.437,0.297,0.095,0.335,0.227,0.267,0.131,0.236,0.657,1.0,0.382,0.573,0.275,0.623,0.244,0.911,0.506
NM_001005592.321_351	......((.(((((.........)))))))	...(((((.............)))))....	0.188,0.155,0.59,0.19,0.303,0.403,0.196,0.208,0.494,0.241,0.025,0.15,0.079,0.412,0.813,0.283,0.266,0.516,0.992,0.174,0.152,0.039,0.039,0.06,0.0,0.036,0.177,0.006,0.033,0.038	0.458,0.128,0.791,0.05,0.169,0.393,0.0,0.77,0.44,0.462,0.816,0.287,0.132,0.21,0.741,0.657,0.9,1.0,1.0,0.283,0.121,0.124,0.05,0.33,0.236,0.105,-1,-1,-1,-1
NM_001006021.1513_1543	...........((((((((...))))))))	...........(((((((.....)))))))	0.313,0.385,0.691,0.08,0.05,0.017,0.197,0.364,0.468,0.371,0.274,0.688,0.049,0.013,0.067,0.155,0.0,0.23,0.605,1.0,0.349,0.468,0.548,0.49,0.199,0.122,0.07,0.099,0.342,0.211	0.122,0.291,0.503,0.061,0.101,0.0,0.063,0.089,0.237,0.319,0.355,0.197,0.13,0.002,0.009,0.0,0.053,0.517,0.467,0.787,0.307,0.403,0.619,0.705,0.131,0.116,0.0,0.065,0.211,0.146
NM_001006076.2267_2297	................((((....))))..	..((((....)).)).((((....))))..	0.732,0.891,0.846,0.316,0.757,0.491,0.315,0.119,0.243,0.132,0.281,0.523,0.764,0.299,0.367,0.501,0.742,0.339,0.314,0.237,0.484,0.179,0.077,0.496,0.0,0.72,0.269,0.047,0.31,0.343	0.758,0.506,0.68,0.259,0.34,0.266,0.166,0.167,0.0,0.089,0.303,0.433,0.249,0.437,0.374,0.125,0.615,0.218,0.237,0.178,0.031,0.0,0.057,0.474,0.026,0.59,0.15,0.01,0.061,0.584
NM_001007182.1685_1715	..............((((...)))).....	...(((...((((((....)).))))))).	0.607,0.769,1.0,0.824,0.572,0.53,0.059,0.201,0.556,0.073,0.199,0.149,0.214,0.089,0.292,0.032,0.087,0.239,0.044,0.088,0.204,0.182,0.154,0.2,0.1,0.346,0.172,0.085,0.806,0.917	0.491,1.0,1.0,0.668,0.503,0.298,0.12,0.191,0.056,0.018,0.084,0.073,0.255,0.003,0.028,0.027,0.01,0.0,0.0,0.056,0.172,0.003,0.138,0.012,0.165,0.062,0.145,0.1,0.485,0.477
NM_001007187.1399_1429	..(((...((((........)))).)))..	.........((((..((.....))..))))	-1,-1,-1,-1,-1,0.144,0.115,0.231,0.255,0.114,0.287,0.123,0.355,1.0,0.765,0.564,0.4,0.252,1.0,1.0,0.738,0.131,0.305,0.634,0.323,0.559,0.446,0.133,0.165,0.004	0.879,1.0,0.453,0.408,0.278,0.0,0.128,0.264,0.0,0.094,0.156,0.0,0.295,1.0,0.363,0.409,0.433,0.193,1.0,1.0,0.568,0.122,0.092,0.554,0.395,0.229,0.0,0.005,0.0,0.068
NM_001007317.1270_1300	...((((........))))...........	...((((........)))).((.....)).	0.565,0.811,0.719,0.092,0.104,0.032,0.13,0.134,0.622,1.0,0.235,1.0,0.727,0.7,0.857,0.168,0.021,0.114,0.013,0.076,0.361,0.29,0.044,0.0,0.094,0.163,0.918,0.312,0.523,0.342	0.449,0.954,0.57,0.041,0.055,0.0,0.033,0.21,0.877,1.0,0.675,1.0,0.858,0.788,0.537,0.048,0.035,0.05,0.0,0.036,0.212,0.1,0.09,0.086,0.0,0.055,1.0,0.281,0.426,0.191
NM_001007343.1619_1649	((((((........))))))..........	((((((...))))))((......)).....	0.362,0.741,0.487,0.493,0.299,0.612,0.167,0.17,1.0,1.0,0.598,0.057,0.22,0.398,0.464,0.223,0.056,0.171,0.09,0.0,0.202,0.471,1.0,0.184,0.11,0.033,0.487,0.893,0.84,0.088	0.495,0.256,0.18,0.018,0.0,0.085,0.105,0.051,0.159,0.479,0.01,0.093,0.163,0.201,0.143,0.218,0.0,0.111,0.076,0.125,0.09,0.449,1.0,0.009,0.0,0.0,0.0,0.695,0.992,0.342
NM_001007346.1534_1564	..............................	...((....................))...	0.242,0.416,0.527,0.163,0.223,0.098,0.733,0.399,0.411,1.0,1.0,0.43,0.612,0.101,0.801,0.463,1.0,0.563,0.423,0.187,0.346,0.56,0.808,0.354,0.204,0.252,0.178,0.161,0.237,0.576	0.222,0.309,0.33,0.0,0.207,0.0,0.369,0.215,0.342,1.0,1.0,0.266,0.478,0.148,0.356,0.278,1.0,0.16,0.303,0.13,0.292,0.742,0.614,0.059,0.117,0.078,0.009,0.007,0.071,0.488
NM_001007369.2188_2218	.((....(((((........)))))))...	.(((.((....))...)))((......)).	0.173,0.076,0.362,0.28,0.389,0.159,0.069,0.459,0.52,0.228,0.171,0.674,0.276,0.697,0.881,0.292,0.063,0.224,0.24,0.17,0.249,0.341,0.343,-1,0.111,0.075,-1,-1,-1,-1	0.0,0.017,0.149,0.064,0.113,0.0,0.058,0.13,0.353,0.13,0.19,0.249,0.251,0.652,0.514,0.189,0.271,0.0,0.0,0.28,0.28,0.089,0.171,0.285,0.122,0.0,0.086,0.0,0.23,0.147
NM_001007411.2024_2054	....((((.................)))).	...(((((((.........))))..)))..	0.442,0.204,0.389,0.154,0.174,0.174,0.156,0.722,0.327,0.407,0.347,0.197,0.723,0.73,1.0,0.233,0.806,0.664,0.595,0.836,0.317,0.227,0.214,0.465,0.713,0.481,0.24,0.188,0.114,0.144	0.381,0.149,0.032,0.047,0.169,0.106,0.056,0.356,0.113,0.089,0.173,0.375,0.541,0.254,0.827,0.594,0.497,0.702,0.603,0.321,0.066,0.067,0.108,0.607,0.322,0.241,0.203,0.053,0.01,0.033
NM_001007777.863_893	((......((......)).....)).....	...............(((.....)))....	0.637,0.268,0.305,0.083,0.0,0.0,0.027,0.175,0.014,0.031,0.0,0.095,0.073,0.269,0.255,0.44,0.181,0.256,0.512,0.432,1.0,1.0,0.454,0.561,0.072,0.864,0.497,0.628,0.31,1.0	0.084,0.627,0.215,0.0,0.0,0.0,0.0,0.0,0.169,0.009,0.0,0.052,0.0,0.072,0.045,0.239,0.04,0.287,0.487,0.694,1.0,0.947,0.202,0.264,0.107,0.744,0.646,0.343,0.082,0.935
NM_001008586.2473_2503	((.((.....))))................	((.((.....))))...(((...)))....	0.165,0.0,0.523,0.219,0.245,0.108,0.149,0.312,0.892,0.809,0.243,0.332,0.094,0.636,0.575,0.302,0.611,0.296,0.461,0.53,0.057,0.367,0.455,0.414,0.247,0.385,0.273,0.439,0.4,0.812	0.128,0.081,0.176,0.066,0.169,0.0,0.15,0.559,0.554,0.446,0.247,0.013,0.146,0.426,0.17,0.09,1.0,0.009,0.107,0.312,0.192,0.684,0.3,0.436,0.131,0.294,0.525,0.318,0.493,0.323
NM_001009987.1283_1313	...(((((..............))..))).	......(((((...........)).)))..	0.853,0.727,0.404,0.431,0.0,0.055,0.274,0.59,0.152,0.236,0.618,0.942,0.329,0.475,0.729,0.38,1.0,0.244,0.404,0.466,0.64,0.644,0.261,0.456,0.413,0.105,0.214,0.324,0.349,0.298	0.619,0.564,0.216,0.144,0.32,0.0,0.109,0.168,0.005,0.243,0.414,0.56,0.235,0.505,0.443,0.202,0.245,0.067,0.289,0.228,0.547,0.13,0.172,0.43,0.191,0.047,0.002,0.193,0.075,0.295
NM_001012487.3583_3613	..............................	......((((((........))))))....	0.695,0.437,0.385,0.261,0.26,0.35,0.36,0.691,0.339,0.603,0.612,0.758,0.483,0.721,0.572,0.849,0.281,0.296,0.718,0.356,0.509,0.079,0.48,0.649,0.72,0.517,0.43,0.82,0.545,0.397	0.496,0.316,0.141,0.164,0.303,0.201,0.277,0.415,0.182,0.457,1.0,0.621,0.429,0.698,0.588,0.513,0.239,0.422,0.323,0.207,0.334,0.091,0.297,0.233,0.434,0.221,0.265,0.748,0.314,0.335
NM_001012500.2245_2275	..((((.....))))...............	.(((((.....))))).((........)).	0.849,1.0,0.581,0.36,0.348,0.229,0.512,0.692,0.858,0.377,0.187,0.529,0.467,0.102,0.541,1.0,0.937,0.429,0.058,0.0,0.0,0.133,0.076,0.389,0.738,0.956,0.474,0.0,0.428,0.129	0.894,0.436,0.323,0.37,0.441,0.0,0.209,0.716,0.532,0.428,0.207,0.191,0.008,0.024,0.372,1.0,0.349,0.146,0.0,0.046,0.009,0.085,0.037,0.122,0.667,0.418,0.192,0.54,0.0,0.681
NM_001013273.3431_3461	.....((((((.........))))))....	.(((.((((((.........)))))).)))	0.244,0.277,0.333,0.114,0.224,0.214,0.149,0.247,0.828,0.482,0.449,0.358,0.339,0.596,0.363,0.324,0.832,0.584,0.413,0.375,0.421,0.608,0.175,0.204,0.454,1.0,0.634,1.0,0.601,0.473	0.116,0.087,0.147,0.019,0.051,0.029,0.142,0.153,0.484,0.323,0.405,0.335,0.362,0.477,0.165,0.185,0.608,0.759,0.178,0.191,0.285,0.339,0.056,0.152,0.2,1.0,0.711,0.896,0.305,0.187
NM_001013540.1449_1479	..((((....))))................	....((..((((.....)))))).......	0.296,0.211,0.36,0.044,0.0,0.28,0.173,0.056,0.304,0.18,0.298,0.153,0.716,0.528,0.052,0.337,0.601,0.982,0.221,0.383,0.61,0.648,0.493,0.842,1.0,0.73,1.0,0.668,0.327,0.249	0.054,0.068,0.177,0.107,0.249,0.0,0.0,0.07,0.15,0.0,0.148,0.06,0.455,0.047,0.0,0.328,0.44,1.0,0.098,0.084,0.159,0.274,0.192,1.0,1.0,0.216,1.0,0.59,0.136,0.083
NM_001013544.1143_1173	..............................	..((((....)).))...............	0.953,0.673,0.932,0.394,0.311,0.14,0.11,0.133,0.564,0.708,0.664,0.469,0.383,0.345,0.268,0.339,0.694,0.674,1.0,0.633,0.656,0.331,0.439,0.124,0.43,0.479,0.423,0.164,0.15,0.489	0.581,0.339,0.216,0.156,0.087,0.108,0.066,0.161,0.415,0.513,0.305,0.341,0.201,0.161,0.072,0.185,0.396,0.461,0.929,0.176,0.38,0.307,0.091,0.0,0.363,0.105,0.382,0.116,0.332,0.295
NM_001014309.1687_1717	.....................((...))..	.(((..(((((((...)))))))....)))	0.956,1.0,1.0,0.874,0.822,0.578,0.339,0.728,0.977,0.431,1.0,0.519,0.925,0.521,0.978,1.0,1.0,0.389,0.317,0.993,0.388,0.0,0.218,0.861,1.0,0.284,0.165,0.106,0.509,0.39	1.0,0.379,0.356,0.134,0.445,0.207,0.133,0.35,0.812,0.733,0.696,0.17,0.775,0.371,0.52,1.0,0.426,0.313,0.179,0.61,0.135,0.0,0.102,0.817,1.0,0.037,0.049,0.0,0.15,0.017
NM_001014351.1438_1468	((((.(((.....)))))))..........	......((((((((.....))).)))))..	0.117,0.099,0.392,0.076,0.158,0.166,0.079,0.247,0.189,0.08,0.212,0.201,0.192,0.662,0.407,0.0,0.302,0.375,0.228,0.16,0.925,0.791,0.176,0.56,0.084,0.144,0.119,0.652,0.767,0.81	0.038,0.0,0.218,0.0,0.0,0.0,0.0,0.0,0.079,0.204,0.274,0.0,0.18,0.37,0.422,0.175,0.325,0.268,0.042,0.159,0.49,0.603,0.169,0.283,0.112,0.138,0.033,0.601,0.639,0.705
NM_001017573.1673_1703	.(((...))).((((((.......))))))	.........((((((((...))))))))..	0.452,0.349,0.218,0.284,0.112,0.387,0.348,0.274,0.277,1.0,1.0,0.349,0.369,0.685,0.37,0.244,0.404,0.324,0.677,0.354,0.135,0.14,0.579,0.339,0.09,0.118,0.096,0.599,-1,-1	0.05,0.338,0.434,0.153,0.139,0.078,0.112,0.148,0.017,0.569,0.822,0.07,0.474,0.4,0.009,0.174,0.1,0.227,0.424,0.227,0.295,0.126,0.072,0.342,0.072,0.0,0.0,0.0,0.058,0.108
NM_001017742.750_780	.((((...))))..................	((((...(((...........)))))))..	0.191,0.365,0.223,0.292,0.156,0.406,0.0,0.465,0.331,0.0,0.3,0.443,0.544,0.186,0.215,0.451,0.991,0.347,0.439,0.087,0.351,0.055,0.519,0.273,0.049,0.11,0.338,0.11,0.07,0.0	0.463,0.1,0.147,0.052,0.255,0.0,0.009,0.205,0.0,0.004,0.312,0.054,0.545,0.102,0.173,0.128,0.278,0.424,0.023,0.0,0.24,0.0,0.0,0.04,0.148,0.134,0.076,0.0,0.09,0.012
NM_001017752.1790_1820	..((((.....))))...............	(((......)))((((.......))))...	0.376,0.338,0.299,0.153,0.148,0.154,0.161,0.294,0.267,0.415,0.312,0.31,0.036,0.199,0.266,0.859,0.55,0.244,1.0,1.0,1.0,0.581,0.409,0.291,0.318,0.128,0.213,0.326,0.372,0.529	0.161,0.188,0.132,0.024,0.049,0.063,0.0,0.164,0.417,0.095,0.174,0.145,0.016,0.0,0.155,0.721,0.236,0.329,0.885,0.798,1.0,0.395,0.261,0.05,0.066,0.0,0.01,0.194,0.144,0.208
NM_001017798.1399_1429	..............................	((((.......))))...............	0.686,1.0,1.0,0.673,0.304,0.405,0.204,0.357,0.28,0.673,0.046,0.156,0.121,0.069,0.245,0.029,0.013,0.561,0.0,0.699,0.275,0.075,0.589,0.109,0.707,0.415,0.295,0.043,0.183,0.246	0.503,0.684,0.673,0.375,0.372,0.179,0.154,0.454,0.57,0.281,0.156,0.38,0.0,0.017,0.074,0.028,0.097,0.266,0.118,0.431,0.076,0.064,0.092,0.406,0.867,0.678,0.157,0.066,0.151,0.296
NM_001017801.826_856	..(((((...............)))))...	.((((((...............))))))..	1.0,1.0,0.868,0.51,0.548,0.335,0.38,0.266,0.501,0.433,0.593,0.662,0.496,0.995,0.469,0.238,0.66,0.148,1.0,0.684,0.807,0.633,0.182,0.467,0.005,0.168,0.418,0.752,0.681,0.514	0.975,0.472,0.496,0.146,0.39,0.028,0.0,0.264,0.103,0.407,0.538,0.356,0.46,0.618,0.296,0.311,0.358,0.219,0.961,0.68,0.619,0.509,0.137,0.161,0.072,0.045,0.217,0.764,0.405,0.536
NM_001017802.1578_1608	...((((((.....)))))).(((...)))	..(((((((.....)))))))(((...)))	1.0,1.0,1.0,0.264,0.182,0.297,0.239,0.159,0.046,0.219,0.185,0.209,0.049,0.209,0.048,0.031,0.397,0.048,0.035,0.035,0.082,0.073,0.0,0.147,0.072,0.0,0.0,0.03,0.03,0.087	1.0,1.0,1.0,0.034,0.053,0.085,0.241,0.117,0.153,0.1,0.169,0.003,0.141,0.185,0.08,0.057,0.172,0.083,0.0,0.001,0.048,0.039,0.087,0.0,0.0,0.0,0.0,0.03,0.061,0.0
NM_001017874.418_448	..............................	...((.................))......	0.768,0.756,0.787,0.361,0.564,0.181,0.347,0.549,0.384,0.406,0.293,0.437,0.314,0.708,0.408,0.397,0.783,0.586,0.414,0.356,0.522,0.46,0.166,0.546,0.71,0.29,0.5,0.324,0.777,0.327	0.645,0.425,0.368,0.234,0.402,0.013,0.087,0.141,0.239,0.26,0.23,0.158,0.137,0.488,0.152,0.205,0.409,0.207,0.1,0.114,0.138,0.231,0.049,0.126,0.296,0.133,0.232,0.064,0.352,0.102
NM_001018083.1100_1130	............(((........)))....	.....(((..(((((.....)))))..)))	0.677,0.262,0.713,0.2,0.347,0.221,0.192,0.183,0.257,0.334,0.492,0.737,0.145,0.447,0.603,0.866,0.608,0.489,1.0,0.565,0.608,0.542,0.612,0.711,0.337,0.306,0.591,1.0,0.346,0.466	0.458,0.294,0.543,0.122,0.363,0.057,0.03,0.102,0.641,0.802,0.414,0.454,0.242,0.493,0.967,1.0,0.129,0.667,1.0,0.266,0.38,0.149,0.148,0.497,0.036,0.524,0.205,0.449,0.256,0.216
NM_001020489.734_764	...((..........)).............	...((.((.(((.....)))...)).))..	0.419,0.328,0.367,0.059,0.44,0.141,0.258,0.323,0.326,0.798,0.505,0.691,0.897,0.543,0.241,0.079,0.16,0.083,0.34,0.233,0.32,1.0,1.0,1.0,0.889,1.0,0.453,0.322,0.372,0.28	0.252,0.219,0.207,0.056,0.34,0.152,0.125,0.0,0.031,0.111,0.58,0.644,0.286,0.205,0.093,0.11,0.0,0.0,0.025,0.049,0.152,1.0,1.0,0.951,0.465,1.0,0.081,0.168,0.167,0.0
NM_001020765.1382_1412	...............(((((.....)))))	.......((((((...))))))........	0.156,0.412,0.616,0.281,0.251,0.173,0.24,0.138,0.504,0.179,0.382,0.359,0.151,0.27,0.373,0.361,0.121,0.072,0.308,0.409,0.46,0.162,0.239,0.248,0.118,0.25,0.181,0.452,0.078,0.127	0.095,0.075,0.363,0.05,0.372,0.0,0.179,0.061,0.115,0.043,0.277,0.073,0.273,0.179,0.196,0.146,0.0,0.024,0.195,0.299,0.22,0.18,0.19,0.169,0.027,0.036,0.071,0.557,0.186,0.245
NM_001020774.3279_3309	...(((((................))))).	..((((((................))))))	0.25,0.141,0.371,0.19,0.223,0.223,0.189,0.048,0.066,0.172,0.79,0.171,0.235,0.0,0.28,0.305,0.302,0.182,0.612,1.0,0.785,0.511,0.036,0.204,0.342,0.23,0.383,0.117,1.0,0.295	0.213,0.186,0.188,0.075,0.343,0.0,0.19,0.061,0.05,0.108,0.815,0.131,0.0,0.046,0.139,0.267,0.118,0.19,0.426,1.0,0.713,0.233,0.028,0.053,0.207,0.105,0.241,0.164,1.0,0.169
NM_001024395.727_757	(((((((.....))).))))..........	(((((((.....)))).)))..........	0.427,0.432,0.475,0.477,0.825,0.376,0.122,0.075,0.19,0.165,0.299,0.627,0.373,0.875,0.183,0.201,0.214,0.527,0.707,1.0,0.852,0.642,0.303,0.839,0.63,0.41,0.502,0.303,0.404,0.773	0.267,0.2,0.671,0.295,1.0,0.354,0.0,0.049,0.0,0.0,0.046,0.625,0.195,0.713,0.018,0.0,0.116,0.488,0.714,1.0,1.0,0.277,0.489,0.875,0.493,0.904,0.421,0.233,0.461,1.0
NM_001024429.1678_1708	............(((.((((...)))))))	.......((((..(((......))).))))	0.234,0.312,0.494,0.665,0.668,0.65,0.056,0.807,0.352,0.62,0.275,0.142,0.35,0.707,0.459,0.239,0.361,0.185,0.25,0.641,0.246,0.278,0.234,0.474,0.151,0.112,0.339,0.137,0.102,0.082	0.092,0.201,0.373,0.031,0.283,0.165,0.312,0.185,0.093,0.14,0.171,0.17,0.18,0.18,0.118,0.247,0.378,0.169,0.22,0.143,0.184,0.222,0.041,0.079,0.11,0.212,0.0,0.0,0.0,0.0
NM_001024461.3617_3647	(((((.......(((....)))..)).)))	.((((.......(((....)))..))))..	0.465,0.703,0.911,0.468,0.08,0.104,0.766,0.142,0.409,0.264,0.585,0.254,0.746,0.437,0.426,0.454,0.03,0.354,0.234,0.0,0.048,0.331,0.034,0.001,0.156,0.049,0.317,0.167,0.0,0.041	0.298,0.198,0.495,0.105,0.183,0.179,0.397,0.118,0.141,0.189,0.299,0.182,0.263,0.096,0.298,0.243,0.17,0.256,0.1,0.012,0.0,0.07,0.016,0.0,0.0,0.034,0.169,0.074,0.145,0.0
NM_001025456.2349_2379	...................(((.....)))	...(((....................))).	0.221,0.254,0.381,0.079,0.354,0.412,0.215,0.446,1.0,1.0,0.891,0.635,0.683,1.0,1.0,1.0,0.858,0.096,0.458,0.323,0.372,0.572,0.272,0.758,0.471,0.253,0.258,0.202,0.281,0.392	0.042,0.0,0.103,0.05,0.071,0.0,0.0,0.252,0.528,1.0,0.188,0.225,0.598,1.0,1.0,1.0,0.55,0.456,0.027,0.307,0.226,0.134,0.221,0.767,0.135,0.208,0.285,0.066,0.186,0.35
NM_001025519.1121_1151	..............................	..((((((.....)).))))..........	0.738,0.495,0.411,0.476,0.596,0.418,0.206,0.711,0.356,1.0,0.905,0.451,0.26,0.352,0.52,0.724,0.951,0.191,0.741,0.386,0.621,0.318,0.873,1.0,0.229,0.74,0.737,0.416,0.447,0.281	0.736,0.302,0.365,0.1,0.503,0.203,0.495,0.128,0.558,1.0,0.785,0.088,0.207,0.105,0.445,0.327,0.321,0.035,1.0,0.241,0.512,0.228,0.282,0.11,0.774,1.0,0.445,0.737,0.325,0.381
NM_001030212.8123_8153	.((((.....((((.......)))))))).	(((((.....((((.......)))))))))	0.731,0.288,0.51,0.17,0.076,0.133,0.278,0.567,0.267,0.764,0.554,0.2,0.332,0.069,0.282,0.43,0.202,0.242,0.224,0.691,0.214,0.13,0.108,0.241,0.356,0.132,0.118,0.225,0.668,0.601	0.201,0.144,0.074,0.138,0.256,0.026,0.341,0.437,0.168,0.553,0.228,0.049,0.066,0.042,0.064,0.181,0.0,0.0,0.249,0.535,0.053,0.046,0.062,0.124,0.213,0.063,0.088,0.103,0.538,0.293
NM_001030286.2181_2211	...((........))...............	......((.(((((........))))).))	0.236,0.27,0.511,0.252,0.619,0.388,0.362,0.524,0.515,0.204,0.438,0.185,0.444,0.27,0.937,0.471,0.245,0.443,0.831,0.764,0.492,0.26,0.612,0.502,0.956,0.494,0.446,0.332,0.311,0.314	0.0,0.008,0.153,0.22,0.548,0.269,0.183,0.221,0.224,0.148,0.187,0.349,0.188,0.07,0.837,0.368,0.459,0.323,0.331,0.698,0.365,0.155,0.241,0.543,0.652,0.011,0.103,0.015,0.155,0.502
NM_001033111.2661_2691	.............(((....))).......	.......(((...(((....)))...))).	0.839,0.565,0.209,0.129,0.325,0.423,0.353,0.345,0.244,0.327,0.626,0.632,0.0,0.433,0.096,0.06,0.216,0.03,0.158,0.115,0.324,0.22,0.073,0.192,0.164,0.548,0.371,0.528,0.451,0.533	0.506,0.164,0.041,0.034,0.198,0.035,0.214,0.12,0.0,0.493,0.983,0.518,0.061,0.106,0.0,0.027,0.035,0.0,0.0,0.126,0.047,0.016,0.0,0.0,0.026,0.217,0.199,0.973,0.287,0.253
NM_001033111.2954_2984	...(((....))).................	..((((.((....))...))))........	1.0,0.663,0.875,0.27,0.241,0.661,0.222,0.32,0.828,0.675,0.607,0.111,0.365,0.51,0.416,0.353,0.148,0.268,0.374,0.271,0.27,0.843,0.309,0.339,0.432,0.701,0.592,0.483,0.371,0.719	0.92,0.321,0.203,0.107,0.128,0.125,0.171,0.185,1.0,0.253,0.365,0.055,0.013,0.175,0.453,0.308,0.149,0.206,0.129,0.135,0.324,0.741,0.181,0.033,0.465,0.402,0.565,0.387,0.514,0.738
NM_001034977.2730_2760	..............................	..(((....))).((((....)).))....	0.915,1.0,0.646,0.673,0.669,0.264,0.112,0.134,0.161,0.56,0.489,1.0,0.851,0.245,0.967,0.952,0.482,0.209,0.186,0.165,0.384,0.669,0.048,0.209,0.539,0.559,0.703,0.165,0.392,0.652	0.364,0.821,0.084,0.017,0.01,0.129,0.013,0.042,0.151,0.386,0.082,0.627,0.217,0.332,0.717,0.305,0.404,0.242,0.0,0.0,0.292,0.581,0.08,0.137,0.202,0.66,0.337,0.089,0.17,0.596
NM_001034977.3330_3360	..((((......))))..............	.....(((((.(((....))))))))....	0.385,0.433,0.141,0.05,0.0,0.134,0.106,0.293,0.266,0.686,1.0,0.618,0.426,0.233,0.119,0.367,0.324,0.195,0.168,0.252,0.048,0.017,0.004,0.08,0.0,0.063,0.217,0.293,0.315,0.241	0.172,0.304,0.036,0.012,0.0,0.0,0.046,0.051,0.36,1.0,1.0,0.552,0.132,0.033,0.147,0.055,0.172,0.088,0.338,0.0,0.049,0.005,0.009,0.011,0.0,0.056,0.173,0.188,0.218,0.157
NM_001034982.2807_2837	........(((......)))..........	.......(((......)))...........	0.279,0.773,0.928,0.207,0.77,0.161,0.272,0.302,0.14,0.078,0.634,0.43,0.508,0.416,0.146,0.443,0.238,0.643,0.22,0.12,0.637,0.874,0.292,0.223,0.127,0.723,0.652,0.755,0.363,0.364	0.323,0.65,0.801,0.092,0.224,0.147,0.047,0.116,0.116,0.213,0.529,0.111,0.296,0.287,0.027,0.064,0.101,0.493,0.312,0.104,0.306,0.531,0.195,0.329,0.213,0.62,0.542,0.455,0.137,0.534
NM_001037106.953_983	..............................	...((....................))...	0.341,0.733,0.665,0.396,0.376,1.0,0.187,0.956,0.672,0.901,1.0,0.36,0.0,0.029,0.339,0.0,0.0,0.124,0.1,0.07,0.349,0.449,0.69,0.255,0.423,0.08,0.3,0.482,0.173,0.186	0.19,0.353,0.322,0.093,0.248,0.376,0.197,1.0,0.466,1.0,1.0,0.191,0.09,0.0,0.294,0.154,0.219,0.068,0.0,0.024,0.694,0.646,0.234,0.052,0.467,0.0,0.154,0.355,0.0,0.106
NM_001037388.1679_1709	..((((.......))))(((......))).	...(((.......))).(((......))).	0.745,0.207,0.54,0.17,0.266,0.129,0.0,0.175,0.703,0.249,0.131,0.542,0.405,0.352,0.296,0.543,0.107,0.164,0.24,0.186,0.454,0.711,0.156,0.131,0.22,0.145,0.282,0.142,0.457,0.239	0.253,0.395,0.466,0.1,0.188,0.108,0.361,0.311,0.687,0.0,0.453,1.0,0.554,0.611,0.581,1.0,0.365,0.207,0.117,0.052,0.421,0.729,0.054,0.22,0.087,0.583,0.268,0.485,0.167,0.207
NM_001040094.1774_1804	..(((.((((((....)).)))).)))...	.((((.((((((....)).)))).))))..	0.406,0.817,0.786,0.012,0.274,0.018,0.115,0.381,0.149,0.368,0.33,0.098,0.232,0.066,0.0,0.136,0.2,0.495,0.569,0.205,0.591,0.07,0.007,0.285,0.477,0.169,0.82,0.542,0.693,0.393	0.38,0.58,0.448,0.11,0.1,0.0,0.03,0.072,0.078,0.175,0.222,0.08,0.189,0.0,0.0,0.072,0.19,0.302,0.639,0.259,0.196,0.01,0.0,0.067,0.183,0.09,0.423,0.119,0.464,0.365
NM_001040299.1338_1368	...((.((.....)))).............	...((.((.....)))).((((...)))).	1.0,0.999,1.0,0.54,0.755,0.014,0.043,0.146,0.116,0.103,0.147,0.354,0.29,0.029,0.19,0.088,0.059,0.19,0.435,0.379,0.239,0.392,0.415,0.218,0.306,0.622,0.523,0.616,0.36,0.277	0.89,0.936,0.71,0.253,0.091,0.048,0.005,0.0,0.0,0.0,0.01,0.358,0.104,0.021,0.04,0.02,0.046,0.147,0.35,0.049,0.105,0.337,0.101,0.19,0.218,0.505,0.128,0.41,0.35,0.426
NM_001044754.887_917	..........((((((.......)).))))	..((....))((((((.......)).))))	0.858,0.914,0.529,0.193,0.049,0.0,0.132,0.0,0.161,0.005,0.043,0.026,0.06,0.025,0.073,0.075,0.16,0.683,1.0,1.0,0.719,0.64,1.0,0.078,0.15,0.935,0.0,0.008,0.0,0.0	0.946,0.758,0.263,0.02,0.0,0.011,0.0,0.0,0.044,0.0,0.0,0.045,0.0,0.0,0.0,0.0,0.066,0.613,1.0,1.0,0.618,1.0,0.893,0.069,0.092,0.558,0.0,0.0,0.007,0.1
NM_001044790.1326_1356	...((.....)).(((.........)))..	((((.....((.(((....))))).)))).	1.0,0.277,1.0,0.268,0.0,0.14,0.737,1.0,0.214,0.685,0.135,0.0,0.052,0.145,0.0,0.0,0.031,0.314,0.324,0.254,0.141,0.064,0.273,0.613,0.117,0.391,0.456,0.259,0.136,0.548	0.728,0.099,1.0,0.077,0.202,0.0,1.0,1.0,0.118,0.615,0.193,0.133,0.0,0.031,0.09,0.0,0.031,0.395,0.199,0.178,0.209,0.061,0.177,0.501,0.474,0.42,0.179,0.289,0.261,0.015
NM_001044921.1474_1504	..............................	.(((...)))....................	0.347,0.321,0.584,0.257,0.174,0.475,0.133,0.292,0.286,0.661,0.055,0.377,0.167,0.244,0.26,0.233,0.879,0.57,0.31,0.325,0.571,1.0,0.452,0.296,0.457,0.34,0.415,0.768,0.234,0.804	0.0,0.048,0.176,0.047,0.223,0.158,0.132,0.219,0.08,0.282,0.184,0.209,0.037,0.18,0.017,0.061,0.453,0.149,0.14,0.146,0.599,0.631,0.187,0.008,0.111,0.47,0.233,0.505,0.218,0.986
NM_001044988.1711_1741	..............................	.(((.....))).((((((....)))))).	0.73,0.494,0.743,0.217,0.425,0.277,0.489,0.44,0.468,0.47,0.524,0.0,0.047,0.748,0.485,1.0,0.99,1.0,0.732,1.0,0.886,0.216,0.324,0.252,0.387,0.517,0.642,1.0,0.562,0.504	0.26,0.433,0.322,0.256,0.326,0.14,0.0,0.036,0.0,0.09,0.105,0.0,0.014,0.21,0.392,0.582,0.903,0.646,0.715,1.0,0.276,0.046,0.315,0.219,0.131,0.28,0.575,1.0,0.551,0.225
NM_001044994.1008_1038	.(((((...)).)))...............	.........(((.....)))..........	0.425,0.41,0.346,0.222,0.245,0.183,0.252,0.077,0.284,0.177,0.199,0.27,0.31,0.287,0.154,0.776,0.451,0.351,0.107,0.332,0.0,0.85,0.776,0.48,0.469,0.43,0.979,0.799,0.497,0.568	0.449,0.362,0.184,0.0,0.292,0.168,0.209,0.0,0.051,0.2,0.205,0.096,0.073,0.447,0.205,0.694,0.342,0.0,0.0,0.085,0.069,0.4,0.735,0.738,0.302,0.518,1.0,0.639,0.16,0.344
NM_001045000.1342_1372	(((((......))).)).............	.((((......)))).((.....)).....	0.426,0.717,0.954,0.283,0.445,0.483,0.73,1.0,0.614,0.358,0.42,0.358,0.187,0.754,0.468,0.391,0.195,0.087,0.662,0.732,0.61,0.142,0.204,0.528,0.201,0.522,0.413,0.136,0.335,1.0	0.276,0.436,0.522,0.016,0.405,0.015,0.507,0.743,0.322,0.126,0.302,0.077,0.132,0.673,0.201,0.333,0.062,0.205,0.633,0.981,0.238,0.089,0.212,0.306,0.363,0.283,0.15,0.17,0.141,0.906
NM_001045098.2113_2143	..............................	....((.(((((....)))))..)).....	0.343,0.292,0.528,0.217,0.372,0.743,0.34,0.411,0.608,0.477,0.674,0.359,0.227,0.267,0.076,0.522,0.16,0.291,0.3,0.122,0.668,0.636,0.307,0.157,0.518,0.771,0.32,0.132,0.826,0.129	0.168,0.108,0.159,0.0,0.232,0.064,0.134,0.202,0.391,0.171,0.53,0.28,0.115,0.106,0.168,0.345,0.151,0.144,0.091,0.159,0.24,0.763,0.271,0.119,0.377,0.495,0.157,0.221,0.576,0.153
NM_001045142.2233_2263	...((((.((...)).))))..........	.((((...))..))((((........))))	0.462,0.433,0.826,0.239,0.649,0.084,0.366,0.355,0.1,0.189,0.22,0.269,0.731,0.253,0.218,0.022,0.155,0.034,0.168,0.555,0.594,0.372,0.828,1.0,0.72,1.0,0.156,0.3,0.073,0.109	0.248,0.424,0.254,0.126,0.696,0.123,0.285,0.385,0.0,0.0,0.135,0.194,0.604,0.045,0.0,0.003,0.065,0.0,0.096,1.0,0.871,0.838,0.836,1.0,0.963,1.0,0.094,0.086,0.08,0.0
NM_001045142.2979_3009	..............................	..(((((...)))))((..........)).	0.745,1.0,0.64,0.561,0.346,0.778,0.715,0.343,0.665,1.0,0.278,0.921,0.176,0.673,0.852,0.433,0.376,0.285,0.783,0.417,0.171,0.068,0.232,0.524,0.74,0.568,1.0,0.697,0.104,0.585	0.987,0.845,0.293,0.051,0.233,0.027,0.0,0.119,0.408,0.773,0.065,0.181,0.005,0.225,0.108,0.0,0.199,0.307,0.545,0.0,0.0,0.086,0.006,0.174,0.379,0.894,0.296,0.156,0.0,0.068
NM_001045161.3291_3321	...........(((....))).........	..((.((....(((....))))).))....	0.634,0.488,0.211,0.246,0.179,0.059,0.19,0.033,0.503,0.108,0.38,0.338,0.198,0.491,0.048,0.251,0.28,0.497,0.547,0.038,0.381,0.246,0.218,0.672,0.296,0.342,0.458,0.141,0.308,0.416	0.434,0.362,0.224,0.074,0.0,0.119,0.0,0.118,0.24,0.395,0.215,0.358,0.055,0.0,0.0,0.0,0.111,0.052,0.135,0.013,0.264,0.069,0.21,0.194,0.037,0.053,0.0,0.0,0.375,0.053
NM_001045203.2690_2720	.....(((...)))................	.......(((.((........)).)))...	0.517,0.413,0.304,0.163,0.056,0.015,0.08,0.0,0.215,0.44,0.384,0.294,0.31,0.946,0.411,0.387,0.325,0.554,0.528,0.192,0.063,0.281,0.134,0.26,0.315,0.461,0.585,0.894,0.115,0.229	0.509,0.176,0.003,0.035,0.031,0.0,0.062,0.079,0.037,0.389,0.223,0.045,0.201,0.616,0.201,0.141,0.157,0.175,0.359,0.0,0.061,0.061,0.032,0.201,0.187,0.159,0.138,0.324,0.016,0.0
NM_001045258.1821_1851	..............................	...((...((((....)))).....))...	0.479,0.702,0.616,0.253,0.175,0.026,0.128,0.156,0.304,0.306,0.355,0.396,0.335,0.299,0.715,0.507,0.404,0.867,0.627,0.45,0.612,0.474,0.789,0.667,0.224,0.203,0.009,0.321,0.241,0.278	0.101,0.161,0.099,0.033,0.077,0.017,0.021,0.124,0.207,0.351,0.336,0.0,0.298,0.326,0.697,0.153,0.104,0.642,0.689,0.345,0.854,0.453,0.538,0.274,0.147,0.197,0.0,0.231,0.11,0.113
NM_001045334.2062_2092	(((.((((((...........)))))))))	((.(((((((...........)))))))))	0.487,0.065,0.257,0.332,0.022,0.014,0.074,0.129,0.318,0.342,0.369,0.929,0.411,0.473,0.295,0.404,0.466,0.367,0.813,0.62,0.635,0.044,0.0,0.0,0.0,0.065,0.0,0.056,0.001,0.027	0.36,0.23,0.177,0.023,0.107,0.147,0.0,0.113,0.088,0.61,0.64,1.0,0.608,0.595,0.281,0.751,0.383,0.57,1.0,1.0,0.377,0.151,0.059,0.0,0.0,0.0,0.0,0.0,0.041,0.019
NM_001076560.1671_1701	..(((.......)))...............	((......))..(((...))).........	0.446,0.553,0.653,0.229,0.281,0.346,0.167,0.242,0.229,0.097,0.044,0.136,0.11,0.202,0.213,0.505,0.575,0.831,0.914,0.362,0.26,0.494,0.434,0.491,0.382,0.371,0.185,1.0,1.0,0.446	0.104,0.597,0.359,0.133,0.361,0.061,0.226,0.157,0.127,0.0,0.0,0.023,0.0,0.0,0.109,0.937,0.497,0.557,0.656,0.215,0.0,0.322,0.321,0.128,0.134,0.237,0.145,0.934,0.943,0.126
NM_001076589.1440_1470	(((((..((..........))..)))))..	...((...))(((((.....))))).....	0.48,0.281,0.477,0.344,0.213,0.261,0.052,0.139,0.312,0.285,0.389,0.088,0.036,0.078,0.362,0.12,0.035,0.024,0.297,0.137,0.223,0.301,0.695,0.35,0.26,0.226,0.652,0.428,0.487,0.946	0.268,0.592,0.539,0.245,0.0,0.0,0.017,0.037,0.0,0.301,0.294,0.156,0.0,0.063,0.222,0.0,0.0,0.0,0.0,0.206,0.386,0.32,0.339,0.238,0.153,0.303,0.312,0.378,0.524,0.693
NM_001076595.1291_1321	..((((...)))).......(((....)))	..((((...)))).((((...)))).....	0.891,0.588,0.713,0.168,0.463,0.33,0.237,0.457,0.192,0.523,0.166,0.116,0.274,0.236,0.427,0.238,0.236,0.366,0.559,0.462,0.38,0.486,0.894,0.745,-1,-1,-1,-1,-1,-1	0.875,0.569,0.447,0.139,0.392,0.2,0.182,0.27,0.161,0.048,0.068,0.37,0.165,0.128,0.149,0.261,0.0,0.209,0.316,0.294,0.267,0.472,0.534,0.461,0.925,0.4,0.38,0.0,0.132,0.025
NM_001077247.1532_1562	...........(((.(((....))))))..	...........((.((((....))))))..	0.754,1.0,0.889,0.647,0.424,0.643,0.548,0.718,1.0,0.8,0.347,0.68,0.164,0.548,0.343,0.433,0.096,0.271,0.421,0.576,0.206,0.221,0.313,0.171,0.567,1.0,0.376,0.258,0.156,0.227	0.369,0.714,0.496,0.248,0.405,0.184,0.708,1.0,0.583,0.473,0.133,0.567,0.067,0.407,0.113,0.158,0.0,0.258,0.352,0.243,0.135,0.325,0.076,0.06,0.753,0.799,0.593,0.002,0.197,0.08
NM_001077271.1418_1448	..((((.........))))...........	.((.((((.((....))..)).))..))..	0.125,0.201,0.401,0.085,0.0,0.091,0.082,0.019,0.0,0.027,0.108,0.226,0.457,0.287,0.396,0.396,0.203,0.314,0.305,0.626,0.181,0.52,0.425,0.537,0.807,0.518,0.398,0.229,0.467,0.333	0.049,0.11,0.138,0.053,0.001,0.0,0.017,0.0,0.0,0.006,0.151,0.17,0.443,0.4,0.169,0.453,0.153,0.267,0.165,0.285,0.271,0.237,0.15,0.326,0.917,0.387,0.099,0.09,0.198,0.304
NM_001077291.2279_2309	((((((...........)))))).......	((((((.(((....))))))))).......	0.153,0.665,0.878,0.0,0.354,0.434,0.323,0.304,0.304,0.587,0.397,0.209,0.583,0.185,0.26,0.607,0.738,0.677,0.517,0.0,0.12,1.0,0.515,0.467,0.551,0.923,0.639,0.484,0.661,0.609	0.108,0.332,0.236,0.096,0.06,0.0,0.313,0.097,0.334,0.055,0.278,0.07,0.528,0.209,0.137,0.008,0.519,0.145,0.0,0.026,0.069,0.262,1.0,0.026,0.844,0.446,0.804,0.238,0.208,0.152
NM_001077329.1339_1369	..((((...))))......(((....))).	..((((...)))).....((((....))))	0.406,0.17,0.699,0.146,0.232,0.0,0.427,0.552,0.376,0.458,0.341,0.202,0.239,0.92,0.444,0.354,0.12,0.479,0.343,0.444,0.773,0.448,0.622,1.0,1.0,0.525,0.181,0.388,0.471,0.349	0.197,0.25,0.182,0.074,0.0,0.041,0.253,0.53,0.241,0.085,0.0,0.0,0.079,0.309,0.272,0.0,0.507,0.24,0.301,0.119,0.207,0.075,0.081,1.0,0.564,0.133,0.218,0.0,0.005,0.192
NM_001077537.3743_3773	........(((..........)))......	.(((...((.((....))..)).)))....	0.289,0.252,0.362,0.154,0.214,0.187,0.089,0.051,0.202,0.006,0.071,0.056,0.324,0.518,0.191,0.257,0.127,0.787,0.881,0.145,0.41,0.075,0.389,0.154,0.248,0.667,0.572,0.728,0.942,0.774	0.109,0.212,0.098,0.099,0.236,0.019,0.0,0.0,0.003,0.088,0.0,0.0,0.228,0.279,0.078,0.101,0.017,0.296,0.512,0.283,0.297,0.341,0.045,0.013,0.211,0.179,0.294,0.751,0.64,0.433
NM_001077563.2656_2686	..((((...................)))).	..........(((((((...)))..)))).	0.227,0.306,0.582,0.095,0.0,0.182,0.237,0.142,0.328,0.368,0.8,0.345,0.363,0.192,0.241,0.491,0.204,0.221,0.591,0.551,0.29,0.43,0.596,0.215,0.269,0.45,0.308,0.231,0.39,0.294	0.0,0.212,0.34,0.027,0.146,0.0,0.065,0.0,0.262,0.348,0.525,0.12,0.137,0.214,0.093,0.359,0.074,0.101,0.606,0.431,0.079,0.342,0.52,0.186,0.161,0.324,0.171,0.295,0.133,0.228
NM_001077564.2430_2460	.........((.(((((....))))).)).	..((((...((((.....))))))))....	0.203,0.333,0.609,0.43,0.297,0.315,0.295,0.3,0.278,0.299,0.38,0.097,0.207,0.187,0.143,0.111,0.325,0.312,0.359,0.2,0.169,0.259,0.311,0.221,0.026,0.013,0.122,0.079,0.553,0.156	0.292,0.197,0.166,0.0,0.109,0.205,0.218,0.205,0.09,0.384,0.272,0.084,0.191,0.198,0.1,0.173,0.167,0.153,0.358,0.218,0.244,0.155,0.334,0.063,0.024,0.097,0.131,0.042,0.42,0.043
NM_001077608.1964_1994	..............................	...(((.................)))....	0.364,0.718,0.822,0.568,0.312,0.475,0.107,0.285,0.138,0.364,0.751,0.956,0.203,0.393,0.543,0.384,0.149,0.681,0.726,0.302,0.213,0.399,0.645,0.49,0.364,0.074,0.15,0.276,0.707,0.352	0.239,0.3,0.232,0.205,0.155,0.115,0.0,0.256,0.091,0.239,0.523,0.518,0.211,0.399,1.0,0.218,0.103,0.39,0.075,0.347,0.15,0.348,0.142,0.261,0.212,0.0,0.166,0.32,0.426,0.328
NM_001079683.2073_2103	((((((...............))))))...	((((.....)))).(((....)))......	0.055,0.108,0.218,0.165,0.331,0.111,1.0,0.243,0.511,0.836,0.096,0.134,0.293,0.237,0.727,0.657,0.495,0.0,0.107,0.195,0.196,0.34,0.323,0.332,-1,-1,-1,-1,-1,-1	0.011,0.128,0.12,0.318,0.507,0.103,0.949,0.517,0.276,0.456,0.06,0.098,0.0,0.15,0.227,0.459,0.256,0.031,0.142,0.182,0.069,0.699,0.213,0.159,0.271,0.957,1.0,0.528,0.227,0.365
NM_001079954.2599_2629	.......(((((........))))).....	(((((........)))))............	0.425,0.322,0.46,0.228,0.101,0.241,0.225,0.113,0.0,0.636,0.174,0.149,0.66,0.138,0.262,0.075,0.518,0.686,0.984,0.635,0.356,0.359,0.173,0.213,0.692,0.589,0.994,0.976,0.674,0.23	0.481,0.109,0.038,0.02,0.234,0.065,0.009,0.056,0.158,0.443,0.138,0.23,0.169,0.206,0.227,0.123,0.367,0.445,0.834,0.326,0.214,0.479,0.1,0.198,0.281,0.984,0.646,1.0,0.21,0.154
NM_001079961.2169_2199	..................(((......)))	.(((....))).......(((......)))	0.388,0.602,0.679,0.03,0.625,0.18,0.093,0.187,0.172,0.326,0.672,0.278,0.328,0.175,0.236,0.309,0.076,0.131,0.106,0.155,0.055,0.093,0.3,0.729,0.347,0.325,0.598,0.756,0.695,0.405	0.369,0.452,0.214,0.119,0.346,0.04,0.007,0.097,0.046,0.422,0.229,0.129,0.188,0.088,0.002,0.035,0.0,0.0,0.0,0.104,0.0,0.122,0.232,0.374,0.19,0.514,0.184,0.603,0.456,0.254
NM_001080007.2374_2404	.(((((..........))))).........	((((((..........))))))........	0.779,0.416,0.442,0.256,0.629,0.254,0.587,0.114,0.86,0.174,0.418,0.362,0.211,0.189,0.026,0.405,0.538,0.058,0.184,0.042,0.304,1.0,1.0,0.511,0.626,1.0,0.43,0.371,0.517,0.339	0.471,0.163,0.624,0.209,0.759,0.283,0.302,0.127,0.479,0.164,0.1,0.23,0.159,0.071,0.0,0.323,0.368,0.071,0.089,0.007,0.227,0.472,0.422,0.505,0.665,0.88,0.221,0.469,0.296,0.269
NM_001080167.4127_4157	...(((((.(((....))).)).....)))	.(((..((.(((....))).))....))).	0.636,0.536,0.585,0.352,0.0,0.101,0.058,0.177,0.22,0.389,0.481,0.11,0.327,0.415,0.505,0.303,0.531,0.581,0.665,0.924,0.533,0.016,0.64,0.575,0.52,0.119,0.024,0.0,0.097,0.0	0.563,0.313,0.376,0.028,0.134,0.0,0.019,0.11,0.225,0.152,0.199,0.18,0.245,0.433,0.222,0.088,0.381,0.778,0.608,0.823,0.239,0.081,0.47,0.721,0.139,0.061,0.064,0.072,0.0,0.015
NM_001080664.1342_1372	...((....))...................	...((....))..(((((....)))))...	0.325,0.865,0.531,0.205,0.244,0.333,0.459,0.205,0.192,0.493,0.181,0.491,0.248,0.23,0.313,0.227,0.285,0.235,0.337,0.145,0.667,0.374,0.145,0.585,0.475,1.0,0.399,0.295,0.525,0.501	0.116,0.611,0.158,0.083,0.156,0.13,0.401,0.0,0.015,0.234,0.237,0.267,0.376,0.13,0.325,0.205,0.199,0.098,0.199,0.118,0.151,0.394,0.046,0.514,0.631,0.524,0.177,0.147,0.276,0.197
NM_001081692.4341_4371	................((((...))))...	........(((......)))..........	0.185,0.204,0.457,0.186,0.552,0.119,0.221,0.009,0.151,0.188,0.009,0.302,0.407,0.919,0.637,0.828,0.553,0.315,0.21,0.643,0.111,0.946,0.681,-1,-1,-1,-1,-1,-1,-1	0.0,0.155,0.192,0.173,0.365,0.207,0.018,0.0,0.064,0.167,0.172,0.121,0.204,0.41,0.735,0.811,0.359,0.018,0.039,0.362,0.289,0.68,0.476,0.396,0.707,0.26,0.609,1.0,0.18,0.162
NM_001083002.1903_1933	........((((............))))..	.(((...................)))....	0.3,0.152,0.47,0.372,0.379,0.55,0.296,0.263,0.424,0.339,0.22,0.217,0.211,0.19,0.107,0.156,0.0,0.039,0.069,0.617,0.404,0.099,0.116,0.081,0.166,0.035,0.409,0.808,0.833,0.425	0.052,0.0,0.32,0.108,0.38,0.237,0.063,0.276,0.947,0.407,0.119,0.079,0.031,0.0,0.0,0.047,0.0,0.0,0.111,0.152,0.162,0.0,0.0,0.0,0.031,0.025,0.258,0.64,0.199,0.165
NM_001083552.512_542	.(((...)))......(((.......))).	.......(((...)))(((.......))).	0.173,0.121,0.0,0.142,0.324,0.308,0.375,0.074,0.044,0.031,0.205,0.255,0.224,0.375,0.2,0.117,0.187,0.0,0.0,0.159,0.784,0.888,0.767,0.501,0.804,0.678,0.276,0.293,0.015,0.222	0.101,0.461,0.191,0.041,-1,-1,-1,-1,-1,-1,-1,-1,-1,-1,-1,-1,-1,-1,-1,-1,-1,-1,-1,-1,-1,-1,-1,-1,-1,-1
NM_001098177.6370_6400	...((......)).................	.(((...))).((........)).......	0.627,0.541,0.421,0.181,0.271,0.725,0.234,0.601,0.332,0.296,0.401,0.341,0.427,0.54,0.342,0.286,0.596,0.319,1.0,0.606,0.808,0.127,0.818,0.026,0.172,0.192,0.925,0.41,0.246,0.656	0.217,0.264,0.316,0.123,0.0,0.11,0.083,0.505,0.085,0.055,0.155,0.053,0.198,0.31,0.0,0.031,0.517,0.382,1.0,0.366,0.372,0.0,0.0,0.041,0.006,0.171,0.944,0.061,0.012,0.128
NM_001098740.900_930	..............................	((......))....................	0.616,0.143,0.689,0.25,0.688,0.205,0.513,0.765,0.341,0.288,0.453,1.0,0.307,0.387,0.609,0.404,0.266,0.361,0.487,0.912,0.781,0.474,0.477,0.266,0.329,0.394,0.53,0.886,0.327,0.766	-1,-1,-1,0.223,-1,0.159,0.538,0.573,0.0,0.088,0.619,1.0,0.203,0.0,0.097,0.128,0.047,0.318,0.0,0.418,0.63,0.179,0.06,0.121,0.0,0.18,0.397,0.626,0.052,0.395
NM_001098766.532_562	..((((((......)))..)))........	....((((......)))).((.......))	0.777,0.441,0.587,0.162,0.422,0.358,0.563,0.773,0.737,0.473,0.17,0.63,0.236,0.26,0.445,0.007,0.66,0.336,0.406,0.498,0.242,0.108,0.306,0.075,0.197,0.496,0.109,0.16,0.276,1.0	0.656,0.445,0.532,0.183,0.466,0.0,0.317,0.358,0.498,0.44,0.213,0.192,0.17,0.233,0.374,0.036,0.087,0.118,0.285,0.024,0.274,0.089,0.005,0.0,0.417,0.016,0.02,0.305,0.097,0.895
NM_001099448.3450_3480	..............................	..............((((....))))....	-1,-1,-1,-1,-1,-1,-1,-1,-1,-1,-1,0.823,0.989,1.0,0.751,0.804,0.95,0.85,0.73,0.541,0.49,0.147,0.479,0.752,0.365,0.301,0.167,1.0,0.845,0.32	1.0,0.9,0.485,0.499,0.411,0.249,0.241,0.0,0.28,0.0,0.756,0.449,0.727,0.371,0.259,0.225,0.725,0.375,0.34,0.481,0.155,0.062,0.213,0.043,0.355,0.095,0.202,0.471,1.0,0.062
NM_001100015.2087_2117	..(((....)))..((((((....))))))	.((((....).)))((((((....))))))	0.526,0.502,0.452,0.211,0.0,0.441,0.31,0.071,0.445,0.296,0.201,0.425,0.223,0.099,0.075,0.213,0.297,0.122,0.009,0.0,0.078,0.398,0.067,0.206,0.231,0.182,0.255,0.099,0.125,0.137	0.381,0.203,0.163,0.149,0.341,0.128,0.305,0.059,0.079,0.501,0.171,0.297,0.137,0.136,0.127,0.656,0.262,0.108,0.108,0.04,0.0,0.121,0.144,0.491,0.151,0.361,0.319,0.15,0.111,0.0
NM_001102621.2111_2141	..............................	.(((.........)))..............	0.196,0.2,0.296,0.142,0.0,0.0,0.045,0.647,0.829,0.471,0.627,1.0,1.0,1.0,0.385,0.492,0.87,1.0,0.789,1.0,1.0,0.666,0.075,0.308,0.0,0.124,0.0,0.024,0.199,0.153	0.185,0.0,0.026,0.097,0.189,0.0,0.158,0.0,0.339,0.412,0.583,1.0,0.906,1.0,0.231,0.249,0.773,1.0,0.518,1.0,1.0,0.617,0.37,0.202,0.0,0.0,0.162,0.0,0.0,0.138
NM_001102621.2364_2394	.(((((((...........)).)))))...	.(((((((..(((...))))).)))))...	0.255,0.312,0.34,0.103,0.353,0.196,0.174,0.081,0.466,0.487,0.687,0.372,0.189,0.323,0.147,0.409,0.526,0.203,0.262,0.161,0.408,0.512,0.314,0.602,0.371,0.099,0.249,0.134,0.156,0.18	0.169,0.082,0.119,0.092,0.081,0.001,0.054,0.17,0.109,0.611,0.732,0.117,0.153,0.217,0.042,0.211,0.38,0.221,0.127,0.067,0.249,0.119,0.16,0.182,0.154,0.179,0.095,0.151,0.286,0.03
NM_001105692.3956_3986	...(((((........))))).........	(((.(((........)))))).........	0.204,0.265,0.295,0.291,0.259,0.104,0.108,0.139,0.241,0.102,0.462,0.259,0.029,0.047,0.061,0.128,0.343,0.617,0.317,0.248,0.502,0.233,0.118,0.482,0.607,0.709,1.0,0.34,0.667,0.055	0.294,0.122,0.384,0.483,0.673,0.0,0.022,0.21,1.0,0.728,0.322,0.521,0.034,0.067,0.051,0.062,0.228,0.761,0.519,0.358,0.668,0.133,0.089,0.605,0.97,1.0,1.0,0.22,0.352,0.116
NM_001110022.2479_2509	.((((..(((.....)))..))))......	.(((....))).......(((....)))..	0.699,0.039,0.073,0.03,0.0,0.0,0.122,0.131,0.0,0.291,0.04,0.147,0.308,0.467,0.953,0.491,1.0,0.127,0.1,0.379,0.385,0.188,0.192,1.0,0.99,0.308,0.154,0.29,0.33,0.251	0.374,0.0,0.049,0.0,0.0,0.0,0.0,0.089,0.024,0.0,0.055,0.06,0.158,0.301,0.553,0.477,1.0,0.1,0.0,0.267,0.398,0.251,0.411,1.0,1.0,0.138,0.286,0.33,0.201,0.48
NM_001110127.2229_2259	...(((.............)))........	...(((.((........)))))........	0.469,0.866,0.356,0.122,0.119,0.207,0.365,0.021,0.374,0.294,0.35,0.345,0.507,0.794,0.727,0.879,0.468,0.39,0.474,0.336,0.19,0.247,0.335,0.665,0.369,0.391,0.579,0.298,0.362,0.319	0.023,0.893,0.0,0.024,0.023,0.0,0.19,0.0,0.184,0.281,0.134,0.189,0.612,0.675,0.46,1.0,0.503,0.373,0.263,0.186,0.094,0.101,0.235,0.532,0.243,0.739,0.252,0.25,0.73,0.354
NM_001110412.1186_1216	.(((......))).................	.((((...))))..................	0.255,0.307,0.473,0.319,0.526,0.401,0.182,0.468,0.182,0.109,0.587,0.265,0.037,0.488,0.02,0.253,0.258,0.53,0.452,0.379,0.737,0.89,0.452,0.886,1.0,1.0,0.893,0.548,0.341,0.567	0.298,0.216,0.32,0.13,0.252,0.161,0.008,0.204,0.027,0.047,0.281,0.146,0.0,0.069,0.402,0.002,0.108,0.78,0.349,0.0,0.902,0.978,0.329,0.811,1.0,1.0,0.437,0.32,0.388,0.339
NM_001110412.1357_1387	.(((((..........))))).........	.(((((.((....)).))))).........	0.478,0.402,0.687,0.273,0.199,0.353,0.513,0.072,0.765,0.232,0.44,0.568,0.395,0.793,0.563,0.533,0.422,0.267,0.312,0.093,0.203,0.79,0.621,0.226,0.0,0.442,0.336,1.0,0.425,0.14	0.303,0.181,0.176,0.06,0.184,0.07,0.068,0.1,0.552,0.322,0.381,0.304,0.243,0.569,0.648,0.105,0.403,0.209,0.179,0.075,0.089,0.814,0.192,0.025,0.057,0.235,0.125,0.932,0.246,0.228
NM_001111178.2000_2030	..............................	((.((..(((........)))....)).))	0.426,0.535,0.889,0.316,0.085,0.368,0.236,0.471,0.855,0.388,1.0,0.578,0.773,0.792,0.402,0.495,0.641,0.406,0.466,0.077,0.526,0.495,0.5,0.14,0.142,0.367,0.735,0.447,0.065,0.255	0.237,0.325,0.326,0.153,0.0,0.081,0.088,0.242,0.418,0.39,1.0,0.617,0.929,1.0,0.532,0.014,0.316,0.752,0.254,0.074,0.344,0.391,0.215,0.039,0.064,0.305,0.974,0.871,0.0,0.156
NM_001114406.2608_2638	...(((......)))...............	.((((...))))..................	0.17,0.119,0.801,0.068,0.0,0.039,0.08,0.242,0.106,0.024,0.12,0.287,0.186,0.088,0.036,0.157,0.035,0.367,0.385,0.761,0.437,0.317,0.58,0.74,0.345,0.282,0.872,1.0,0.523,0.134	0.075,0.113,0.374,0.028,0.0,0.0,0.012,0.002,0.0,0.028,0.069,0.08,0.139,0.029,0.012,0.134,0.086,0.296,0.467,0.568,0.23,0.344,0.546,0.942,0.155,0.365,0.75,1.0,0.374,0.058
NM_001114429.2487_2517	.((((.(((((....)))..))))))....	(((((.(((((....)))..)))))))...	1.0,0.685,0.413,0.131,0.0,0.06,0.157,0.067,0.0,0.086,0.499,0.398,1.0,0.577,0.462,0.851,0.457,0.21,0.493,0.601,0.181,0.464,0.472,0.166,0.066,0.0,0.601,0.25,0.492,0.474	0.301,0.281,0.119,0.082,0.19,0.0,0.08,0.067,0.06,0.036,0.248,0.329,0.559,0.329,0.165,0.468,0.07,0.301,0.77,0.395,0.117,0.103,0.0,0.068,0.069,0.092,0.408,0.047,0.524,0.539
NM_001114723.1345_1375	..............................	......((((((..........))))))..	0.33,0.208,0.341,0.341,0.302,0.23,0.321,0.469,0.183,0.587,0.815,0.195,0.875,0.893,1.0,0.506,0.973,0.624,0.451,0.563,0.687,1.0,1.0,0.638,1.0,1.0,0.851,0.364,0.693,0.087	0.128,0.204,0.137,0.089,0.44,0.0,0.257,0.015,0.065,0.162,0.515,0.097,0.94,0.37,0.444,0.186,-1,0.327,0.485,0.315,0.595,0.989,0.899,0.021,0.957,0.73,0.514,0.0,0.063,0.0
NM_001115140.2049_2079	..............................	...................(((....))).	0.296,0.141,0.518,0.267,0.254,0.264,0.124,0.401,0.178,0.531,0.758,0.672,0.92,0.801,1.0,1.0,0.981,0.701,1.0,0.7,0.661,0.119,0.249,0.232,0.204,0.219,0.667,0.134,0.014,0.009	0.124,0.159,0.132,0.064,0.182,0.044,0.0,0.279,0.21,0.664,0.874,0.288,0.608,0.65,1.0,1.0,0.919,0.663,1.0,0.781,0.343,0.161,0.211,0.081,0.098,0.133,0.735,0.091,0.045,0.022
NM_001122749.3574_3604	...((((....))))...............	...((((....)))).((...)).......	0.185,0.191,0.278,0.238,0.163,0.065,0.214,0.53,0.672,0.45,0.201,0.501,0.333,0.556,1.0,0.473,0.091,0.066,0.322,0.491,0.555,0.169,0.41,0.358,0.373,0.415,0.646,1.0,0.671,0.816	0.0,0.139,0.082,0.166,0.129,0.0,0.145,0.333,0.286,0.352,0.089,0.242,0.169,0.342,1.0,0.528,0.0,0.0,0.434,0.137,0.064,0.029,0.172,0.207,0.523,0.129,0.739,0.48,0.562,0.289
NM_001123056.2556_2586	...(((..((......)).)))........	..................((((....))))	0.461,1.0,1.0,0.144,0.0,0.0,0.117,0.153,0.131,0.645,0.363,0.759,0.659,0.577,0.465,0.53,0.101,0.586,0.432,0.494,0.262,0.066,0.341,0.467,0.553,0.763,0.085,0.178,0.443,0.339	0.413,0.708,0.851,0.028,0.0,0.0,0.0,0.0,0.089,0.34,0.349,0.646,0.875,0.16,0.827,0.768,0.138,0.242,0.287,0.303,0.069,0.157,0.108,0.363,0.484,0.459,0.036,0.178,0.055,0.09
NM_001123056.3331_3361	...((.(((((......)))))...))...	...((.((((((....))))))...))...	-1,-1,-1,-1,-1,-1,-1,-1,-1,-1,1.0,0.847,0.567,1.0,0.87,0.767,0.637,0.597,0.445,0.403,0.164,0.158,0.257,0.254,0.213,0.737,0.233,0.517,0.253,0.094	0.923,0.0,0.452,0.136,0.325,0.22,0.336,0.88,0.753,0.39,1.0,0.427,0.405,0.858,0.444,0.776,0.51,0.416,0.401,0.349,0.294,0.188,0.413,0.551,0.357,0.551,0.298,0.372,0.195,0.232
NM_001123062.1960_1990	...((.....))..................	...((..(((........)))....))...	0.529,0.524,0.403,0.096,0.167,0.0,0.059,0.069,0.121,0.079,0.098,0.49,0.226,0.355,0.547,0.429,0.731,0.532,0.551,0.782,0.41,0.367,0.637,0.671,0.499,0.0,0.411,0.459,0.365,0.907	0.817,0.503,0.262,0.053,0.106,0.159,0.052,0.0,0.024,0.072,0.083,0.402,0.0,0.093,0.437,0.149,0.642,0.333,0.452,0.316,0.534,0.003,0.543,0.237,0.3,0.013,0.25,0.342,0.458,0.575
NM_001123255.3406_3436	..............................	.(((...((((...))))...)))......	0.631,0.484,0.647,0.551,0.288,0.515,0.053,0.298,0.155,0.447,0.471,0.173,0.148,0.208,0.258,0.111,0.259,0.531,0.563,0.176,0.08,0.17,0.221,0.265,0.842,0.458,0.453,0.093,0.42,0.343	0.657,0.359,0.432,0.153,0.13,0.108,0.021,0.088,0.155,0.116,0.149,0.033,0.25,0.289,0.212,0.05,0.096,0.26,0.353,0.091,0.0,0.0,0.132,0.179,0.35,0.236,0.324,0.157,0.402,0.292
NM_001123288.2373_2403	..((((....)))).(((.....)))....	..((((....)))).(((((.....)))))	0.841,0.678,1.0,0.334,0.446,0.197,0.005,0.193,0.315,0.241,0.358,0.237,0.023,0.108,0.28,0.261,0.143,0.748,0.553,0.0,0.56,0.122,0.306,0.201,0.0,0.21,0.101,0.376,0.661,0.09	0.526,0.196,0.194,0.069,0.096,0.0,0.009,0.0,0.017,0.009,0.083,0.066,0.017,0.057,0.083,0.191,0.066,0.419,0.14,0.05,0.161,0.084,0.061,0.052,0.002,0.069,0.164,0.145,0.224,0.052
NM_001127515.3759_3789	........(((......)))..........	...((....))....((..........)).	0.183,-1,-1,-1,-1,0.266,0.126,0.517,0.339,0.341,0.178,0.047,0.285,0.497,0.552,0.186,0.253,0.199,0.0,0.515,0.188,0.661,0.831,0.108,0.687,0.402,0.241,0.177,0.887,0.221	-1,-1,-1,-1,-1,-1,-1,0.8,0.455,0.529,0.171,0.0,0.162,0.136,0.091,0.0,0.167,0.237,0.061,0.461,0.067,0.362,0.087,0.0,0.602,0.592,0.093,0.0,0.16,0.16
NM_001135579.1097_1127	.((..((.(((.......)))))..))...	(((..((.(((.......)))))..)))..	0.671,0.601,0.798,0.288,0.021,0.084,0.186,0.041,0.167,0.051,0.212,0.55,1.0,0.378,0.122,0.556,0.554,0.465,0.281,0.059,0.145,0.18,0.422,0.451,0.975,0.539,0.495,0.47,0.14,0.457	0.383,0.434,0.393,0.099,0.165,0.012,0.106,0.0,0.028,0.121,0.085,0.534,1.0,0.172,0.216,0.64,0.42,0.45,0.097,0.0,0.112,0.134,0.411,0.947,0.942,0.465,0.491,0.361,0.235,0.488
NM_001135579.771_801	..(((...............))).......	((((.....)))).................	0.61,0.411,0.439,0.116,0.185,0.578,0.274,0.019,0.222,0.3,0.39,0.153,0.979,0.437,0.388,0.326,0.202,0.413,0.062,0.133,0.189,0.048,0.706,0.13,0.299,0.426,0.555,0.611,0.586,0.702	0.337,0.277,0.301,0.14,0.172,0.133,0.447,0.2,0.162,0.134,0.234,0.151,0.703,0.416,0.185,0.175,0.225,0.083,0.111,0.081,0.042,0.216,0.434,0.057,0.129,0.3,0.773,0.444,0.743,0.561
NM_001144045.3557_3587	..((.(((....))))).............	((((.(((....))).))))..........	0.394,0.635,0.496,0.168,0.442,0.219,0.136,0.159,0.188,0.294,0.189,0.107,0.242,0.495,0.191,0.383,0.629,0.63,0.49,0.414,0.694,0.941,0.775,0.549,0.036,0.369,0.083,0.497,0.461,0.284	0.234,0.346,0.227,0.128,0.0,0.258,0.015,0.038,0.024,0.404,0.125,0.0,0.012,0.699,0.2,0.124,0.36,0.322,0.423,0.329,0.379,1.0,0.799,0.167,0.1,0.113,0.148,0.241,0.101,0.203
NM_001166255.4666_4696	..(((......................)))	..(((...((...........))....)))	0.199,0.101,0.192,0.033,0.174,0.152,0.0,0.2,0.007,0.426,0.451,0.581,0.465,0.649,0.479,0.161,0.293,0.284,0.52,0.661,0.542,0.817,0.96,0.203,0.249,0.024,0.064,0.271,0.343,0.197	0.0,0.052,0.0,0.128,0.029,0.066,0.0,0.073,0.0,0.064,0.451,0.31,0.328,0.598,0.023,0.04,0.433,0.352,0.247,0.302,0.335,0.407,0.683,0.0,0.083,0.062,0.0,0.121,0.0,0.0
NM_001167661.2408_2438	........(((.(((........))).)))	.....((((((...))))))..........	0.481,0.377,1.0,0.168,0.122,0.319,0.181,0.155,0.172,0.164,0.132,0.41,0.227,0.052,0.095,0.154,0.244,0.034,0.538,0.16,0.709,0.296,0.112,-1,-1,-1,-1,-1,-1,-1	0.366,0.428,0.555,0.173,0.194,0.11,0.197,0.2,0.213,0.152,0.311,0.321,0.106,0.053,0.185,0.15,0.312,0.138,0.014,0.162,0.648,0.562,0.0,0.0,0.254,0.333,0.131,0.155,0.556,0.319
NM_001172637.336_366	..............................	.((........)).................	0.2,0.125,0.439,0.155,0.411,0.312,0.373,0.511,0.728,0.488,0.463,0.281,0.334,0.359,0.489,0.315,0.213,0.415,0.409,0.372,0.12,0.201,0.01,0.188,0.516,0.147,0.218,0.372,0.456,0.243	0.099,0.128,0.215,0.052,0.161,0.145,0.171,0.516,0.596,0.512,0.261,0.174,0.329,0.282,0.634,0.36,0.144,0.413,0.423,0.162,0.042,0.204,0.01,0.158,0.435,0.213,0.11,0.188,0.295,0.056
NM_001193674.6412_6442	....(((.........)))...........	.((.(((((((......)))).))).))..	0.157,0.111,0.197,0.229,0.209,0.415,0.04,0.304,0.29,0.421,0.596,0.392,0.516,0.682,0.348,0.516,0.223,0.27,0.333,0.773,0.569,0.429,0.473,0.55,0.963,0.899,0.543,0.395,0.09,0.065	0.157,0.09,0.113,0.047,0.102,0.086,0.101,0.192,0.412,0.421,0.345,0.345,0.543,0.956,0.317,0.325,0.048,0.213,0.412,0.712,0.464,0.414,0.156,0.42,0.928,0.877,0.425,0.244,0.101,0.016
NM_001197257.2134_2164	........(((.(.((....)).))))...	..(((........))).((((....)))).	1.0,1.0,1.0,0.568,0.665,0.419,0.426,0.466,0.437,0.0,0.124,0.032,0.253,0.123,0.285,0.177,0.355,1.0,1.0,0.768,0.275,0.035,0.233,0.436,0.064,0.433,0.209,0.72,0.334,0.064	1.0,0.599,0.676,0.146,0.47,0.149,0.241,0.22,0.3,0.0,0.0,0.0,0.006,0.139,0.222,0.113,0.39,0.908,0.832,0.537,0.294,0.0,0.199,0.243,0.0,0.382,0.194,0.576,0.138,0.0
NM_001198889.848_878	((.((....)))).((((......)).)).	...((....)).((((......))))....	0.633,0.445,0.854,0.317,0.539,0.594,0.248,0.679,0.462,0.076,0.222,0.048,0.184,0.265,0.065,0.028,0.138,0.257,0.134,0.243,0.227,0.871,0.316,0.244,0.249,0.288,0.71,0.378,0.081,0.421	0.327,0.163,0.56,0.114,0.28,0.375,0.156,0.437,0.331,0.097,0.033,0.039,0.222,0.072,0.012,0.0,0.252,0.487,0.094,0.042,0.435,0.825,0.225,0.0,0.006,0.192,0.511,0.101,0.225,0.137
NM_001198890.829_859	.(.((....))).(((((......)).)))	...((....)).((((......))))....	0.741,0.447,0.892,0.449,0.173,0.759,0.156,0.376,0.499,0.132,0.095,0.063,0.224,0.208,0.037,0.15,0.126,0.261,0.281,0.095,0.369,0.895,0.43,0.178,0.268,0.187,0.442,0.242,0.206,0.455	0.367,0.375,0.45,0.449,0.391,0.539,0.092,0.503,0.208,0.101,0.0,0.035,0.187,0.103,0.0,0.0,0.233,0.335,0.198,0.0,0.278,0.714,0.199,0.073,0.171,0.342,0.634,0.099,0.121,0.259
NM_001198891.642_672	((.((....)))).((((......)).)).	...((....)).((((......))))....	0.781,0.521,1.0,0.455,0.601,0.848,0.222,0.663,0.502,0.137,0.135,0.0,0.233,0.243,0.162,0.047,0.082,0.274,0.15,0.192,0.256,0.666,0.4,0.262,0.349,0.331,0.281,0.221,0.241,0.375	0.535,0.496,0.525,0.151,0.374,0.318,0.009,0.372,0.252,0.0,0.0,0.151,0.055,0.061,0.158,0.006,0.108,0.316,0.075,0.085,0.389,0.557,0.15,0.093,0.09,0.267,0.393,0.111,0.021,0.314
NM_001199375.1038_1068	(((....))).((((.......))))....	...........((((.......))))....	0.621,0.351,1.0,0.356,0.491,0.312,0.409,0.6,0.222,0.124,0.038,0.074,0.024,0.093,0.165,0.152,0.088,0.117,0.142,0.045,0.296,0.085,0.11,0.055,0.095,0.038,0.002,0.03,0.0,0.0	0.541,0.659,1.0,0.336,0.83,0.163,0.447,0.61,0.238,0.24,0.099,0.0,0.075,0.233,0.0,0.056,0.042,0.042,0.077,0.022,0.095,0.002,0.0,0.0,0.075,0.372,0.028,0.037,0.0,0.0
NM_001200039.1155_1185	.((((....................)))).	.((((...(((.......)))....)))).	0.167,0.0,0.341,0.007,0.0,0.092,0.013,0.0,0.746,0.362,0.065,0.42,0.34,0.743,0.186,0.316,0.662,1.0,0.653,0.204,0.429,0.259,0.337,0.072,0.244,0.115,0.027,0.133,0.458,0.0	0.108,0.076,0.228,0.0,0.0,0.0,0.018,0.007,0.21,0.209,0.0,0.083,0.248,0.482,0.123,0.183,0.524,1.0,0.427,0.127,0.268,0.116,0.0,0.0,0.0,0.06,0.025,0.134,0.087,0.0
NM_001201421.3300_3330	((((((...(((........))))).))))	((((.....(((((.......)))))))))	0.546,0.206,0.605,0.074,0.499,0.461,0.308,0.315,0.236,0.433,0.8,0.36,0.562,0.229,0.532,0.567,0.279,0.735,0.685,0.476,0.064,0.51,0.352,0.066,0.452,0.353,0.169,0.048,0.464,0.184	0.139,0.037,0.138,0.009,0.103,0.09,0.058,0.205,0.335,0.297,0.58,0.3,0.159,0.17,0.291,0.372,0.441,0.653,0.391,0.038,0.091,0.344,0.14,0.016,0.365,0.424,0.014,0.186,0.186,0.091
NM_001201535.6455_6485	((((......))))......(((....)))	..((((.....)))).((.........)).	0.0,0.0,0.14,0.0,0.092,0.037,0.137,0.815,-1,0.645,0.211,-1,-1,-1,-1,-1,-1,-1,-1,-1,-1,-1,-1,-1,-1,-1,-1,-1,-1,-1	0.044,0.011,0.0,0.0,0.0,0.0,0.327,0.862,1.0,0.352,0.133,0.0,0.0,0.041,0.0,0.012,0.0,0.002,0.0,0.0,0.028,0.13,0.922,0.099,0.0,0.0,0.0,0.0,0.0,0.018
NM_001202493.9582_9612	..((((.......))))(((....)))...	...(((.......)))((((....))))..	0.276,0.66,0.161,0.202,0.621,0.495,0.359,0.24,0.182,0.319,0.751,0.729,0.562,0.553,0.056,0.359,0.056,0.189,0.059,0.209,0.245,0.207,0.217,0.0,0.162,0.091,0.056,0.665,0.0,0.377	0.094,0.339,0.497,0.089,0.023,0.264,0.476,0.0,0.042,0.326,0.911,0.525,0.099,0.079,0.159,0.302,0.22,0.0,0.0,0.119,0.098,0.215,0.252,0.187,0.037,0.0,0.096,0.017,0.189,0.188
NM_001256603.1567_1597	......(((..(((....))).))).....	(((........)))(.((((...)))))..	0.243,0.421,0.542,0.595,0.305,1.0,0.378,0.0,0.09,0.905,0.422,0.07,0.38,0.061,0.282,0.116,0.681,0.667,0.298,0.422,0.321,0.475,0.0,0.208,0.048,0.367,0.703,0.242,0.277,0.632	0.119,0.415,0.954,0.161,0.414,0.221,0.228,0.55,0.027,1.0,0.168,0.055,0.0,0.0,0.235,0.081,0.436,0.314,0.343,0.662,0.389,0.491,0.132,0.0,0.076,0.239,0.705,0.219,0.727,0.388
NM_001256642.1686_1716	................((....))......	((((((..(((....)))..))).)))...	0.552,0.416,0.555,0.464,0.645,0.23,0.746,0.368,0.763,0.92,1.0,0.594,0.259,0.291,0.496,0.166,0.149,0.119,0.208,0.342,0.436,0.088,0.031,0.159,0.194,0.344,0.856,0.219,0.543,0.45	0.459,0.268,0.295,0.123,0.577,0.17,0.872,0.601,0.727,0.766,1.0,0.218,0.024,0.348,0.282,0.078,0.04,0.158,0.385,0.261,0.337,0.0,0.0,0.056,0.333,0.322,0.523,0.14,0.578,0.183
NM_001277124.1008_1038	.......((((.......))))........	....((.((((.......))))...))...	0.816,0.565,0.67,0.137,0.375,0.216,0.136,0.553,0.365,0.13,0.193,0.205,0.178,0.073,0.135,0.378,0.32,0.194,0.029,0.265,0.225,0.35,0.208,0.234,0.219,0.117,0.537,0.538,0.292,0.056	0.792,0.728,0.402,0.138,0.095,0.121,0.065,0.472,0.239,0.206,0.01,0.149,0.125,0.201,0.195,0.389,0.4,0.079,0.15,0.141,0.142,0.226,0.268,0.088,0.049,0.103,0.473,0.479,0.073,0.0
NM_001278598.1665_1695	..((((...)))).................	.(((...((((.........))))..))).	0.493,0.548,0.376,0.164,0.464,0.233,0.242,0.161,0.453,0.313,0.094,0.174,0.221,0.11,0.548,0.416,0.289,0.005,0.0,0.147,0.181,0.257,0.208,0.666,0.802,0.157,0.161,0.221,0.426,0.639	0.369,0.323,0.227,0.021,0.0,0.149,0.128,0.061,0.057,0.022,0.051,0.004,0.216,0.135,0.384,0.0,0.183,0.002,0.0,0.054,0.221,0.199,0.061,0.388,0.369,0.097,0.08,0.078,0.116,0.241
NM_001291356.1486_1516	.(((((...)))))................	.(((((...))))).(((...)))......	0.255,0.478,0.283,0.065,0.194,0.045,0.196,0.391,0.27,0.229,0.158,0.124,0.053,0.052,0.047,0.178,0.274,0.094,0.116,0.067,0.243,0.304,0.641,0.314,0.377,0.207,0.12,0.087,0.07,0.215	0.276,0.289,0.225,0.026,0.213,0.028,0.075,0.201,0.09,0.111,0.015,0.059,0.038,0.05,0.021,0.069,0.056,0.0,0.052,0.199,0.14,0.162,0.575,0.111,0.298,0.178,0.125,0.064,0.127,0.241
NM_001301360.1562_1592	.((((..((......))..)))).......	.((((((.(......))).)))).......	0.741,0.627,0.585,0.211,0.373,0.038,0.119,0.178,0.33,0.221,0.709,0.299,1.0,0.883,0.783,0.698,0.232,0.359,0.276,0.296,0.097,0.397,0.512,0.648,0.232,0.286,0.497,0.532,0.612,0.773	0.751,0.666,0.397,0.272,0.489,0.0,0.019,0.215,0.305,0.173,0.609,0.371,1.0,0.889,0.666,0.513,0.069,0.262,0.057,0.0,0.11,0.226,0.363,0.371,0.09,0.151,0.173,0.239,0.32,0.438
NM_001302222.2857_2887	...(((((((((......)))).)))))..	((((((((.(((......)))))))).)))	0.642,0.822,0.913,0.186,0.881,0.717,0.42,0.457,0.229,0.13,0.251,0.166,0.557,0.531,0.723,0.468,0.399,0.702,1.0,0.705,0.855,0.523,0.242,0.187,0.11,0.216,0.104,0.091,0.193,0.145	0.088,0.328,0.284,0.149,1.0,0.166,0.13,0.051,0.271,0.178,0.083,0.203,0.395,0.174,0.696,0.567,0.457,1.0,1.0,0.711,0.183,0.235,0.052,0.193,0.012,0.105,0.016,0.088,0.151,0.106
NM_001305464.5093_5123	...((...))....................	........((.....)).............	0.486,0.46,0.685,0.174,0.282,0.231,0.195,0.376,0.099,0.134,0.733,0.371,1.0,0.752,0.645,0.746,0.345,0.342,0.762,0.587,0.557,1.0,1.0,0.988,0.829,0.667,0.602,0.435,0.459,0.241	0.289,0.283,0.619,0.009,0.191,0.0,0.0,0.202,0.0,0.287,0.886,0.574,0.644,0.516,0.4,0.126,0.0,0.567,0.776,0.46,0.375,0.684,0.858,1.0,0.584,0.464,0.65,0.414,0.371,0.417
NM_001308551.1183_1213	.((((.(((........)))))))......	.....(((((((...)))))))........	0.854,0.66,0.991,0.286,0.584,1.0,0.704,0.145,0.831,0.852,0.717,1.0,0.875,0.318,0.309,0.182,0.51,0.078,0.107,0.554,0.517,0.41,0.246,0.815,0.616,0.959,0.492,0.32,0.54,0.436	0.677,0.504,0.681,0.286,0.439,0.247,0.561,0.33,0.436,0.397,0.282,1.0,0.561,0.389,0.473,0.482,0.408,0.065,0.044,0.415,0.539,0.462,0.59,0.499,0.408,1.0,0.27,0.502,0.375,0.67
NM_001309527.1564_1594	..............................	..((.((........)).))..........	0.129,0.288,0.538,0.127,0.014,0.242,0.321,0.239,0.693,0.167,1.0,0.56,0.831,0.396,0.433,0.584,0.306,0.132,0.488,0.855,0.097,1.0,1.0,0.494,0.406,0.295,0.678,0.705,0.485,0.376	0.058,0.14,0.381,0.001,0.051,0.0,0.089,0.155,0.368,0.069,0.772,0.155,0.791,0.071,0.204,0.1,0.254,0.209,0.219,0.525,0.165,1.0,1.0,0.263,0.095,0.093,0.279,0.688,0.243,0.112
NM_001312917.2370_2400	....((..(((((......)).))).))..	....((...((((......))))...))..	1.0,0.699,0.579,0.326,0.073,0.455,0.455,0.775,0.603,0.498,0.35,0.292,0.273,0.205,0.352,0.564,0.049,0.354,0.397,0.304,0.002,0.562,0.164,0.168,0.036,0.157,0.152,0.362,0.522,0.401	0.712,0.411,0.346,0.223,0.196,0.172,0.376,0.529,0.272,0.451,0.02,0.16,0.054,0.199,0.158,0.346,0.042,0.428,0.014,0.147,0.095,0.195,0.09,0.109,0.052,0.031,0.098,0.267,0.2,0.283
NM_001320078.5232_5262	........(((((((......))).)))).	.((((.......)))).((...))......	0.189,0.153,0.915,0.369,0.418,0.371,0.56,0.183,0.023,0.393,0.379,0.305,0.201,0.242,0.374,0.0,0.142,0.0,0.012,0.123,0.07,0.035,0.036,0.205,0.753,0.381,0.303,0.434,0.431,0.116	0.05,0.226,0.194,0.213,0.1,0.0,0.558,0.042,0.089,0.341,0.093,0.066,0.097,0.061,0.054,0.057,0.115,0.0,0.14,0.24,0.149,0.098,0.0,0.063,0.296,0.124,0.358,0.242,0.151,0.0
NM_001320439.2930_2960	..............................	((((.((((...))))))))..........	0.408,0.39,0.616,0.167,0.236,0.192,0.122,0.327,0.487,0.632,0.444,0.82,0.321,0.609,0.406,0.195,0.355,0.434,0.958,0.987,0.336,0.562,0.722,1.0,0.948,0.464,0.69,1.0,0.854,0.712	0.328,0.158,0.225,0.035,0.157,0.087,0.161,0.252,0.211,0.446,0.232,0.611,0.149,0.33,0.201,0.268,0.393,0.327,0.687,0.454,0.16,0.427,0.329,1.0,0.945,0.355,0.797,0.775,1.0,0.581
NM_001326392.4263_4293	..............................	...........(((........))).....	0.312,0.279,0.457,0.277,0.352,0.105,0.42,0.622,0.317,0.338,0.173,0.189,0.243,0.068,0.328,0.226,0.024,0.369,0.272,0.37,0.144,0.454,0.431,0.222,0.038,0.0,0.0,0.153,0.079,0.605	0.064,0.005,0.005,0.045,0.183,0.127,0.31,0.428,0.271,0.318,0.155,0.043,0.016,0.0,0.026,0.07,0.031,0.159,0.0,0.145,0.0,0.227,0.045,0.142,0.089,0.172,0.0,0.147,0.036,0.203
NM_001326693.1604_1634	...((......)).................	((....(((......)))....))......	0.283,0.351,0.142,0.097,0.866,0.579,0.589,0.533,0.535,0.191,0.15,0.192,0.06,0.555,0.356,0.51,0.302,0.199,0.165,0.547,0.671,0.82,0.952,0.166,0.286,0.8,1.0,0.656,0.521,0.822	0.098,0.013,0.067,0.132,0.591,0.331,0.472,0.385,0.391,0.025,0.015,0.0,0.085,0.451,0.394,0.443,0.0,0.0,0.17,0.171,0.2,0.329,0.326,0.0,0.039,0.6,0.893,0.502,0.323,0.427
NM_001326705.2682_2712	..............(((.....))).....	...((....))...(((.....))).....	0.303,0.0,0.113,0.084,0.0,0.15,0.0,0.119,0.136,0.285,0.224,0.288,0.38,0.129,0.208,0.454,0.599,0.461,0.552,0.52,1.0,0.666,0.204,0.235,0.307,0.268,0.192,0.522,0.18,0.633	0.0,0.14,0.08,0.0,0.175,0.108,0.035,0.027,0.034,0.104,0.244,0.023,0.225,0.0,0.186,0.383,0.122,0.154,0.335,0.456,0.379,0.335,0.025,0.0,0.09,0.047,0.0,0.0,0.133,0.335
NM_001327765.1860_1890	.((((..........))))...........	((((...((((((....)).))))..))))	0.576,0.494,0.448,0.406,0.682,0.071,0.336,0.611,0.542,0.728,0.198,0.204,0.15,0.282,0.514,0.362,0.192,0.371,0.297,0.497,0.243,0.0,0.649,0.307,0.106,0.065,0.198,0.453,0.384,0.694	0.41,0.04,0.342,0.342,0.562,0.232,0.464,0.769,0.6,0.494,0.025,0.176,0.094,0.344,0.364,0.117,0.16,0.0,0.05,0.258,0.167,0.129,0.172,0.146,0.056,0.032,0.025,0.19,0.232,0.049
NM_001327830.3009_3039	.................(((.......)))	(((....))).......(((.......)))	0.367,0.343,0.255,0.042,0.187,0.314,0.352,0.189,0.496,0.33,0.162,0.196,0.627,0.149,0.403,0.11,0.0,0.073,0.128,0.219,0.257,0.219,1.0,0.219,0.334,0.725,0.663,0.129,0.111,0.908	0.164,0.0,0.188,0.084,0.282,0.0,0.032,0.026,0.073,0.0,0.0,0.0,0.406,0.0,0.0,0.093,0.0,0.0,0.042,0.0,0.214,0.135,0.891,0.373,0.27,0.699,0.693,0.203,0.05,0.268
NM_001327851.5146_5176	.....(((((....)))))...........	...((((....))))...............	0.231,0.022,0.021,0.29,0.0,0.0,0.036,0.085,0.056,0.032,0.062,0.048,0.064,0.542,0.789,0.119,0.226,0.073,0.008,0.213,0.113,0.221,0.159,0.182,0.227,0.137,0.475,0.056,0.178,0.3	0.0,0.0,0.026,0.067,0.0,0.0,0.024,0.016,0.043,0.043,0.0,0.0,0.081,0.465,1.0,0.321,0.347,0.017,0.012,0.17,0.252,0.094,0.122,0.437,0.327,0.189,0.27,0.152,0.13,0.482
NM_001327852.5229_5259	.................((((...))))..	((((...(((........)))...))))..	0.203,0.191,0.556,0.131,0.145,0.392,0.332,0.362,0.76,0.781,0.575,0.431,0.793,1.0,1.0,0.741,1.0,0.408,0.265,0.688,0.514,0.754,0.651,0.211,0.199,0.116,0.156,0.451,0.298,0.465	0.225,0.079,0.143,0.119,0.092,0.0,0.234,0.165,0.435,0.311,0.444,0.563,0.753,1.0,0.945,1.0,1.0,0.431,0.228,0.533,0.225,0.533,0.658,0.272,0.182,0.074,0.137,0.664,0.191,0.339
NM_001327862.3524_3554	............(((...((....)).)))	((((........))))..............	0.605,0.343,0.75,0.228,0.444,0.208,0.328,0.238,0.617,0.378,1.0,0.396,0.186,0.251,0.322,0.471,0.322,0.813,0.55,0.176,0.794,0.765,0.496,0.27,0.55,0.34,0.273,0.121,0.417,0.307	0.353,0.307,0.408,0.135,0.122,0.0,0.142,0.504,0.39,0.457,0.898,0.182,0.064,0.209,0.342,0.264,0.113,0.814,0.223,0.335,0.6,0.582,0.272,0.248,0.359,0.698,0.219,0.219,0.323,0.231
NM_001328059.3507_3537	...((((....))))((((......)))).	..(((((....)))))(((......)))..	1.0,0.674,0.466,0.122,0.0,0.093,0.0,0.346,1.0,0.272,0.568,0.0,0.137,0.046,0.206,0.093,0.068,0.116,0.047,0.041,0.255,0.493,0.615,0.351,0.601,0.593,0.279,0.236,0.246,0.353	1.0,0.276,0.086,0.0,0.0,0.085,0.0,0.483,0.803,0.236,0.402,0.0,0.0,0.0,0.041,0.067,0.136,0.062,0.0,0.115,0.292,0.22,0.137,0.421,0.471,0.34,0.07,0.088,0.597,0.612
NM_001328125.3806_3836	....((((.....)))).............	....((((.....))))((....)).....	0.511,0.466,0.664,0.302,0.166,0.252,0.125,0.037,0.101,0.696,1.0,0.588,0.413,0.082,0.273,0.249,0.225,0.104,0.214,0.233,0.49,0.315,0.412,0.216,0.336,0.468,0.111,0.306,0.113,0.477	0.266,0.552,0.483,0.062,0.192,0.009,0.0,0.264,0.033,0.699,1.0,0.456,0.201,0.035,0.042,0.037,0.559,0.157,0.096,0.391,0.529,0.306,0.228,0.078,0.153,0.421,0.234,0.405,0.059,0.526
NM_001328126.630_660	(((((...................))))).	(((((.((......))........))))).	0.551,1.0,0.738,0.351,0.19,0.119,0.28,0.2,0.476,0.106,0.832,0.679,0.622,0.102,0.298,0.675,0.814,1.0,0.538,0.299,0.198,0.298,0.451,0.574,0.255,0.174,0.113,0.022,0.417,0.212	0.502,1.0,0.69,0.455,0.496,0.273,0.009,0.0,0.02,0.491,0.25,0.307,0.27,0.09,0.109,0.415,0.823,0.935,0.358,0.554,0.229,0.211,0.181,0.294,0.0,0.01,0.035,0.0,0.044,0.0
NM_001328126.973_1003	....((((.....)))).............	....((((.....))))((....)).....	0.578,0.546,0.539,0.243,0.227,0.246,0.048,0.364,0.115,0.393,1.0,0.493,0.418,0.25,0.164,0.198,0.177,0.198,0.0,0.364,0.465,0.345,0.292,0.097,0.325,0.296,0.16,0.208,0.157,0.563	0.239,0.387,0.344,0.151,0.124,0.031,0.083,0.084,0.215,0.475,1.0,0.496,0.227,0.15,0.063,0.096,0.301,0.071,0.078,0.316,0.611,0.299,0.173,0.021,0.281,0.394,0.073,0.317,0.121,0.563
NM_001328370.2097_2127	..(((..((........)).))).......	..................(((......)))	0.632,0.671,0.689,0.311,0.321,0.0,0.18,0.326,0.282,0.002,0.006,0.0,0.0,0.0,0.0,0.082,0.005,0.15,0.131,0.013,0.211,0.066,0.0,0.058,0.0,0.094,0.157,0.841,0.662,0.0	0.246,0.509,0.5,0.377,0.577,0.3,0.211,0.103,0.34,0.0,0.111,0.017,0.195,0.177,0.123,0.0,0.093,0.0,0.0,0.0,0.0,0.0,0.0,0.0,0.096,0.126,0.184,0.447,0.295,0.0
NM_001328530.3026_3056	...(((.(((((.....)))))))).....	.(((((((........))))))).......	1.0,0.677,0.883,0.476,0.118,0.11,0.213,0.0,0.162,0.274,0.534,0.659,0.264,0.49,0.582,0.328,0.182,0.048,0.192,0.054,0.133,0.303,0.292,0.222,0.023,0.127,0.232,0.309,0.374,0.23	0.721,0.654,0.333,0.25,0.563,0.0,0.136,0.068,0.079,0.387,0.587,0.629,0.234,0.087,0.343,0.243,0.097,0.061,0.159,0.061,0.097,0.098,0.036,0.0,0.0,0.0,0.13,0.0,0.095,0.035
NM_001328573.1341_1371	..............................	((((....................))))..	0.528,0.345,0.307,0.386,0.332,0.58,0.094,0.337,0.267,0.165,0.361,0.145,0.242,0.357,1.0,0.675,0.472,0.067,0.578,0.101,0.254,0.239,0.29,0.0,0.341,0.421,0.136,0.412,0.305,0.039	0.035,0.029,0.112,0.079,0.236,0.11,0.0,0.182,0.075,0.202,0.001,0.134,0.684,0.342,0.898,0.465,0.0,0.258,0.268,0.045,0.043,0.0,0.149,0.0,0.041,0.115,0.093,0.0,0.186,0.0
NM_001328581.3006_3036	...(((.((......)).))).........	...(((.(((.........)).)...))).	0.672,0.953,0.402,0.182,0.173,0.381,0.57,0.501,0.153,0.216,0.466,0.727,0.526,0.876,0.194,0.03,0.126,0.26,0.273,0.108,0.133,0.65,0.315,0.255,0.055,0.579,0.611,0.135,0.15,0.304	0.793,1.0,0.276,0.078,0.143,0.183,0.402,0.416,0.001,0.153,0.626,0.427,0.255,0.765,0.336,0.133,0.036,0.13,0.059,0.155,0.194,0.416,0.244,0.092,0.205,0.11,0.139,0.082,0.0,0.098
NM_001328592.2212_2242	...(((((((...)))).))).........	(((..(((((...)))))))).........	0.656,0.343,0.405,0.162,0.153,0.094,0.225,0.462,0.342,0.297,1.0,0.869,1.0,0.482,0.227,0.347,0.0,0.415,0.462,0.035,0.183,0.331,0.058,0.0,0.119,0.04,0.154,0.284,0.194,0.108	0.13,0.19,0.146,0.034,0.186,0.0,0.061,0.201,0.275,0.258,0.998,0.975,1.0,0.48,0.163,0.231,0.02,0.21,0.047,0.0,0.129,0.117,0.009,0.0,0.036,0.0,0.12,0.25,0.138,0.082
NM_001347671.8250_8280	...((((...))))................	((.((((...))))))..............	0.637,0.468,0.893,0.12,0.228,0.101,0.151,0.291,0.607,0.946,0.194,0.217,0.12,0.526,0.053,0.656,0.355,0.112,0.195,0.211,0.319,0.468,1.0,0.323,0.259,0.231,0.258,0.091,0.178,0.206	0.171,0.144,0.2,0.0,0.114,0.0,0.218,0.451,0.333,0.621,0.052,0.08,0.0,0.435,0.083,0.544,0.498,0.009,0.01,0.066,0.272,0.379,1.0,0.288,0.433,0.191,0.0,0.088,0.037,0.043
NM_130922.1692_1722	..(((...)))...................	.(((....((.............))..)))	0.637,0.535,0.56,0.274,0.286,0.898,0.666,0.727,0.062,0.282,0.134,0.195,0.229,0.163,0.373,0.466,0.782,1.0,0.639,1.0,0.956,0.241,0.131,0.241,0.113,0.023,0.218,0.479,0.655,0.28	0.0,0.069,0.165,0.076,0.149,0.208,0.042,0.067,0.0,0.039,0.0,0.0,0.0,0.137,0.0,0.121,0.626,0.672,0.452,0.651,0.77,0.026,0.0,0.0,0.014,0.09,0.033,0.099,0.26,0.026
NM_130922.794_824	.......(((((((........))))))).	..((((.(((....)))..)))).......	1.0,0.696,0.561,0.251,0.164,0.249,0.165,0.1,0.384,0.392,0.215,0.702,1.0,1.0,0.524,0.381,0.12,0.278,0.159,0.339,0.182,0.12,0.128,0.247,0.223,0.386,0.161,0.257,0.259,0.575	1.0,0.364,0.158,0.129,0.167,0.021,0.064,0.021,0.18,0.187,0.236,0.681,1.0,1.0,0.075,0.214,0.166,0.0,0.061,0.118,0.028,0.137,0.024,0.09,0.398,0.229,0.078,0.336,0.14,0.642
NM_131024.1483_1513	............(((........)))....	.(((.....))).((........)).....	0.29,0.125,0.364,0.189,0.503,0.343,0.451,0.459,0.238,0.59,0.358,0.811,0.474,0.202,0.368,0.244,0.615,0.605,0.277,0.739,0.737,0.611,0.229,0.624,0.565,0.719,0.363,1.0,0.322,0.318	0.225,0.136,0.277,0.0,0.326,0.0,0.327,0.099,0.05,0.071,0.272,0.518,0.207,0.033,0.402,0.0,0.124,0.32,0.096,0.543,0.371,0.62,0.0,0.158,0.641,0.368,0.673,0.608,0.323,0.023
NM_131057.2449_2479	....(((..........)))..........	.(((((.(((((......))))).))))).	0.152,0.276,0.938,0.229,0.154,0.041,0.038,0.308,0.258,0.393,0.393,0.726,0.525,0.809,0.919,0.396,0.571,0.189,0.156,0.359,1.0,0.567,0.264,0.538,1.0,1.0,0.293,0.945,1.0,1.0	0.042,0.232,0.384,0.121,0.267,0.0,0.08,0.182,0.19,0.067,0.146,0.279,0.812,0.692,0.676,0.17,0.397,0.066,0.069,0.073,1.0,0.603,0.395,0.286,1.0,1.0,0.35,0.558,0.856,1.0
NM_131057.2482_2512	......(((((.((........)).)))))	.((((.((..(((....)))..)).)))).	0.746,0.568,1.0,0.654,0.38,0.35,0.26,0.619,0.738,0.347,0.43,0.315,0.234,0.44,0.464,0.522,0.6,0.413,0.271,0.099,0.138,0.085,0.0,0.032,0.269,0.237,0.167,0.191,0.15,0.366	0.248,0.323,0.408,0.244,0.974,0.037,0.377,0.491,0.578,0.205,0.245,0.137,0.305,0.303,0.589,0.354,0.587,0.167,0.151,0.051,0.165,0.053,0.025,0.044,0.115,0.124,0.177,0.076,0.161,0.3
NM_131113.2394_2424	..............................	......((((..............))))..	0.25,0.546,0.466,0.238,0.04,0.052,0.217,0.166,0.266,0.839,0.004,0.34,0.499,1.0,0.848,0.767,0.0,0.704,0.288,0.911,0.19,1.0,0.485,0.465,0.237,0.396,0.538,0.309,0.577,0.272	0.125,0.248,0.13,0.031,0.131,0.037,0.133,0.0,0.317,0.534,0.006,0.122,0.373,0.619,0.245,0.395,0.132,0.361,0.383,0.05,0.8,1.0,0.873,0.298,0.238,0.111,0.322,0.179,0.182,0.299
NM_131220.986_1016	..(((...))).((((....))))......	.(((((.....(((((....))))))))))	0.157,0.215,0.415,0.077,0.017,0.151,0.136,0.275,0.08,0.416,0.363,0.53,0.361,0.263,0.538,0.144,0.767,0.578,0.265,0.339,0.412,0.045,0.102,0.052,0.365,0.839,0.16,0.466,0.746,0.402	0.129,0.104,0.14,0.008,0.036,0.042,0.023,0.134,0.0,0.21,0.162,0.327,0.239,0.386,0.311,0.093,0.467,0.53,0.018,0.189,0.109,0.047,0.045,0.056,0.156,0.396,0.161,0.247,0.291,0.473
NM_131250.2220_2250	..((((...........)))).........	..((((.(((...))).)))).........	0.259,0.522,0.486,0.217,0.415,0.673,0.249,0.562,0.506,0.567,0.612,0.287,0.499,0.429,0.528,0.372,0.495,0.307,0.445,0.752,0.321,0.741,1.0,1.0,0.831,0.263,0.185,0.542,0.404,0.575	0.113,0.443,0.153,0.175,0.409,0.703,0.355,0.434,0.277,0.44,0.464,0.43,0.267,0.319,0.68,0.219,0.247,0.064,0.0,0.131,0.0,0.285,1.0,1.0,0.422,0.0,0.067,0.448,0.116,0.18
NM_131345.2664_2694	......((((...)))).............	.(((....))).(((((...))))).....	0.387,0.277,0.369,0.091,0.554,0.342,0.192,0.174,0.0,0.311,0.677,0.7,0.436,0.124,0.037,0.129,0.331,0.073,1.0,0.235,0.215,0.249,0.384,1.0,1.0,0.236,0.696,0.806,0.091,0.304	0.464,0.399,0.184,0.177,0.994,0.38,0.352,0.29,0.199,0.646,1.0,0.973,0.657,0.039,0.173,0.2,0.254,0.089,1.0,0.197,0.164,0.037,0.457,0.545,0.901,0.208,1.0,0.723,0.413,0.419
NM_131355.3042_3072	..(((((((....)).)).)))........	.((((((((....)).)).)))).......	0.467,0.648,0.701,0.191,0.276,0.244,0.281,0.564,0.245,0.604,0.442,0.81,0.747,0.586,0.691,0.632,0.331,0.442,0.764,0.475,0.049,1.0,0.869,0.487,0.382,0.32,0.318,0.377,0.424,0.681	0.578,0.375,0.355,0.079,0.191,0.047,0.018,0.279,0.156,0.35,0.32,1.0,0.135,0.448,0.251,0.468,0.292,0.249,0.406,0.292,0.037,1.0,0.507,0.778,0.185,0.156,0.082,0.507,0.495,0.911
NM_131366.1928_1958	(((......((((......))))....)))	...(((...((((......))))....)))	0.164,0.201,0.396,0.246,0.397,0.724,1.0,1.0,1.0,0.0,0.175,0.099,0.18,0.285,0.445,0.72,0.716,0.017,0.504,0.242,0.451,0.263,0.356,0.758,0.297,0.787,0.419,0.524,0.471,0.283	0.153,0.254,0.219,0.004,0.393,0.46,1.0,0.925,0.738,0.04,0.0,0.0,0.245,0.126,0.661,0.461,0.796,0.325,0.127,0.063,0.067,0.107,0.315,1.0,0.276,0.74,0.416,0.403,0.109,0.419
NM_131370.1719_1749	.(((...((.....))..))).........	...(((.((.....))...)))........	0.552,0.172,0.103,0.143,0.088,0.04,0.066,0.088,0.134,0.377,0.879,0.446,0.179,0.132,0.338,0.572,0.287,0.0,0.197,0.203,0.382,0.149,0.055,0.447,0.158,0.217,0.522,0.5,0.987,0.346	0.344,0.125,0.14,0.073,0.0,0.0,0.0,0.061,0.043,0.233,0.695,0.223,0.085,0.0,0.09,0.633,0.117,0.0,0.002,0.249,0.222,0.0,0.186,0.497,0.314,0.229,0.284,0.124,0.384,0.132
NM_131382.1464_1494	...((.......)).((......)).....	((((.((..((...))..)).)))).....	0.646,0.452,0.515,0.305,0.565,0.308,0.426,0.365,0.502,0.555,0.504,0.249,0.135,0.0,0.105,0.0,0.0,0.272,0.053,0.218,0.0,0.177,0.258,0.205,0.0,0.263,0.109,0.205,0.068,0.023	0.552,0.422,0.183,0.165,0.238,0.084,0.23,0.198,0.493,0.479,0.335,0.211,0.081,0.025,0.008,0.0,0.02,0.303,0.277,0.319,0.166,0.051,0.109,0.155,0.052,0.074,0.15,0.159,0.0,0.017
NM_131520.8012_8042	..............................	((((.....((.......)).....)))).	0.499,0.502,0.448,0.34,0.094,0.136,0.229,0.454,0.57,0.374,0.369,0.68,1.0,0.466,0.548,0.721,0.62,0.517,0.542,0.223,0.553,0.73,0.322,0.234,0.513,0.299,0.868,0.781,0.222,0.223	0.164,0.469,0.216,0.098,0.147,0.066,0.114,0.186,0.431,0.124,0.419,0.516,1.0,0.369,0.23,0.801,0.328,0.186,0.55,0.106,0.487,0.77,0.19,0.123,0.489,0.302,0.388,0.537,0.101,0.241
NM_131524.1761_1791	..............................	.................(((......))).	0.428,0.282,0.563,0.359,0.624,0.235,0.262,0.252,0.264,0.161,1.0,0.525,0.805,0.489,0.211,0.427,0.149,0.092,0.725,0.08,0.712,0.373,0.481,0.591,0.105,0.082,0.293,0.337,0.093,0.217	0.051,0.116,0.114,0.108,0.306,0.035,0.172,0.186,0.14,0.23,0.999,0.365,0.652,0.15,0.282,0.181,0.058,0.113,0.397,0.072,0.499,0.12,0.4,0.299,0.072,0.088,0.176,0.201,0.13,0.102
NM_131569.2982_3012	......(((((.....))))).........	......(((((.....))))).((...)).	0.551,0.835,0.97,0.414,0.524,0.332,0.392,0.909,0.0,1.0,0.332,1.0,0.564,0.245,0.236,0.348,0.437,0.0,0.358,0.175,0.287,0.12,0.222,0.208,0.149,0.0,0.531,0.19,0.226,0.627	0.441,0.708,0.456,0.198,0.42,0.12,0.393,0.532,0.098,0.797,0.643,1.0,0.274,0.27,0.084,0.257,0.275,0.067,0.339,0.076,0.123,0.073,0.149,0.15,0.013,0.017,0.337,0.085,0.073,0.173
NM_131599.891_921	........(((.(((.....))))))....	..(((.((....)).))).(((...)))..	0.447,0.638,0.398,0.332,0.779,0.529,0.221,0.955,0.478,1.0,1.0,1.0,0.89,0.037,0.17,0.108,0.098,0.196,0.12,0.067,0.169,0.229,0.374,0.11,0.214,0.34,0.481,0.737,0.391,0.911	0.2,0.671,0.266,0.106,1.0,0.288,0.305,0.424,0.229,1.0,0.983,1.0,0.871,0.04,0.053,0.0,0.0,0.0,0.062,0.053,0.0,0.127,0.278,0.018,0.074,0.162,0.716,0.291,0.437,0.565
NM_131637.1372_1402	.............(((........)))...	((((......))))....(((...)))...	0.242,0.144,0.173,0.0,0.173,0.0,0.0,0.019,0.007,0.0,0.283,0.204,0.236,0.146,0.047,0.084,0.266,0.354,0.706,0.736,0.083,1.0,0.247,0.217,0.283,0.217,0.225,0.203,1.0,0.314	0.206,0.096,0.042,0.015,0.046,0.0,0.0,0.0,0.0,0.061,0.04,0.159,0.011,0.0,0.001,0.0,0.084,0.134,0.264,0.338,0.147,0.964,0.103,0.06,0.051,0.116,0.18,0.39,0.502,0.203
NM_131662.1671_1701	...((...............))........	...((..(((....)))...))........	0.168,0.383,0.94,0.144,0.0,0.264,0.422,0.514,0.481,0.441,0.278,0.21,0.625,0.458,0.225,0.723,1.0,0.733,0.208,0.266,0.342,0.315,0.957,1.0,0.527,0.237,0.259,0.44,0.586,0.417	0.185,0.109,0.29,0.088,0.204,0.0,0.282,0.112,0.132,0.189,0.142,0.123,0.534,0.128,0.278,0.375,1.0,0.621,0.027,0.15,0.145,0.178,0.861,1.0,0.255,0.062,0.196,0.267,0.278,0.442
NM_131662.1888_1918	..((....)).(((...)))..........	.(((.......(((...)))......))).	0.295,0.457,0.411,0.119,0.244,0.082,0.155,0.221,0.263,0.0,0.228,0.11,0.19,0.021,0.304,0.397,0.698,0.367,0.357,0.499,0.846,0.534,0.534,0.508,0.88,0.489,0.633,0.25,0.006,0.511	0.409,0.213,0.03,0.027,0.0,0.0,0.125,0.126,0.019,0.0,0.013,0.003,0.065,0.042,0.058,0.112,0.224,0.097,0.191,0.131,0.581,0.29,0.354,0.289,0.365,0.121,0.22,0.0,0.029,0.309
NM_131664.1432_1462	((.(.((..((((......)))).))))).	........((..(((......)))..))..	0.184,0.281,0.391,0.877,0.554,0.288,0.008,0.256,0.573,0.024,0.305,0.456,0.634,0.535,0.304,0.321,0.633,0.562,0.461,0.483,0.676,0.409,0.688,0.585,0.301,0.279,0.0,0.194,0.109,0.0	0.363,0.277,0.287,0.948,0.833,0.452,0.018,0.091,0.312,0.254,0.555,0.606,0.895,0.606,0.11,0.696,1.0,0.391,1.0,0.606,0.858,0.791,0.926,0.642,0.452,0.083,0.134,0.0,0.335,0.34
NM_131702.2383_2413	.......(((((((........))).))))	(((((................)))))....	0.41,0.342,0.291,0.17,0.342,0.286,0.157,0.422,0.425,0.204,0.0,0.0,0.072,0.048,0.053,0.118,0.131,0.158,0.405,0.459,0.765,0.297,0.502,0.463,0.772,0.619,0.445,0.496,0.485,0.516	0.201,0.179,0.061,0.094,0.337,0.089,0.301,0.734,0.407,0.142,0.021,0.009,0.044,0.148,0.059,0.114,0.193,0.218,0.52,0.421,0.769,0.219,0.479,0.571,1.0,0.459,0.895,0.614,0.647,0.996
NM_131715.1912_1942	..(((....)))..................	..(((....))).(((..........))).	0.746,0.398,0.227,0.409,0.27,0.344,0.185,0.532,0.661,0.114,0.38,0.39,0.181,0.598,0.186,1.0,1.0,0.961,0.233,0.398,0.25,0.478,0.213,0.327,0.151,0.296,0.475,0.556,0.271,0.398	0.313,0.319,0.431,0.054,0.198,0.221,0.0,0.226,0.722,0.238,0.419,0.32,0.456,0.283,0.043,1.0,0.931,0.41,0.031,0.528,0.463,0.362,0.121,0.086,0.027,0.224,0.19,0.212,0.23,0.123
NM_131715.1944_1974	..............................	.................(((.....)))..	0.583,0.236,0.288,0.12,0.546,0.297,0.037,0.415,0.488,1.0,0.65,0.351,1.0,1.0,1.0,0.634,0.422,0.327,0.443,0.808,0.412,0.138,1.0,0.684,0.639,0.578,0.449,1.0,0.515,0.743	0.189,0.207,0.295,0.005,0.276,0.016,0.0,0.104,0.0,0.894,0.42,0.4,0.306,0.678,0.9,0.26,0.101,0.079,0.237,0.589,0.32,0.19,1.0,0.412,0.794,0.19,0.139,0.975,0.408,0.848
NM_131790.2651_2681	.......(((((....))))).........	.......((.(((((......))))).)).	0.2,0.26,0.4,0.174,0.335,0.227,0.278,0.146,0.077,0.114,0.27,0.108,0.06,0.361,0.485,0.231,0.33,0.303,0.691,0.487,0.418,0.314,1.0,0.399,0.301,0.504,0.388,0.48,0.463,0.826	0.068,0.091,0.115,0.07,0.232,0.0,0.088,0.065,0.044,0.054,0.151,0.132,0.153,0.07,0.558,0.189,0.269,0.3,0.57,0.445,0.245,0.049,0.717,0.179,0.117,0.152,0.278,0.245,0.36,0.344
NM_131810.1546_1576	.(((.....)))........(((....)))	.(((.....)))......(((......)))	0.411,0.388,0.782,0.19,0.251,0.48,0.142,0.201,0.356,0.169,0.18,0.317,0.49,0.788,0.22,0.772,0.122,0.368,0.302,0.29,0.137,0.117,0.269,0.347,0.627,0.752,0.52,0.255,0.18,0.315	0.161,0.369,0.556,0.119,0.403,0.166,0.283,0.057,0.191,0.114,0.217,0.12,0.2,0.299,0.018,0.453,0.171,0.202,0.015,0.078,0.0,0.061,0.039,0.167,0.422,0.603,0.442,0.182,0.04,0.074
NM_131886.1993_2023	.................(((.......)))	.....(((.(((((........))))))))	0.419,0.129,0.446,0.243,0.145,0.177,0.13,0.345,0.451,0.436,0.344,0.229,0.924,0.446,0.436,0.185,0.377,0.499,0.157,0.185,0.903,0.522,0.83,0.747,1.0,0.188,0.41,0.467,0.241,0.1	0.378,0.188,0.092,0.117,0.24,0.009,0.072,0.37,0.437,0.27,0.228,0.118,0.606,0.823,0.244,0.241,0.391,0.076,0.024,0.283,1.0,0.625,0.497,1.0,1.0,0.023,0.155,0.303,0.288,0.08
NM_145118.5709_5739	..((((((..............)).)))).	.(((((((..............)).)))))	0.568,0.572,0.59,0.166,0.12,0.23,0.232,0.337,0.45,0.701,0.494,0.483,0.506,1.0,0.938,0.424,0.784,0.809,0.227,0.17,0.57,0.756,0.296,0.184,0.258,0.204,0.219,0.198,0.438,0.48	0.592,0.383,0.167,0.124,0.153,0.0,0.011,0.168,0.39,0.637,0.22,0.329,0.207,0.875,0.715,0.359,0.324,0.434,0.064,0.102,0.43,0.471,0.152,0.03,0.093,0.0,0.014,0.078,0.316,0.193
NM_153667.1058_1088	..(((......................)))	(((...((......))...)))........	0.24,0.179,0.244,0.0,0.184,0.225,0.017,0.193,0.274,0.377,0.296,0.207,0.183,0.685,0.981,0.222,0.751,0.746,0.315,0.452,0.605,0.217,0.866,0.251,0.179,0.128,0.153,0.135,0.234,0.455	0.0,0.0,0.103,0.014,0.236,0.0,0.0,0.0,0.012,0.028,0.109,0.0,0.124,0.146,0.201,0.148,0.525,0.653,0.453,0.05,0.08,0.27,0.85,0.091,0.0,0.0,0.0,0.094,0.0,0.217
NM_153669.1205_1235	..............................	...(((............))).........	0.806,0.53,0.863,0.459,0.602,1.0,0.303,0.777,0.598,0.171,0.879,0.927,0.79,0.567,0.218,0.201,0.077,0.207,0.504,0.229,0.707,1.0,0.295,0.015,1.0,0.281,0.515,0.727,0.25,1.0	0.438,0.45,0.518,0.198,0.467,0.704,0.081,0.774,0.646,0.0,0.506,0.424,0.552,0.128,0.0,0.0,0.004,0.0,0.191,0.0,0.397,0.676,0.183,0.157,0.745,0.076,0.079,0.04,0.388,1.0
NM_170763.2192_2222	...(((...............)))......	((((((...((....))....))).)))..	0.589,0.804,1.0,0.359,0.154,0.418,0.423,0.62,0.547,0.271,0.416,0.218,0.237,0.582,0.818,1.0,0.918,1.0,0.337,0.166,0.177,0.305,0.348,0.501,0.282,0.0,0.143,0.203,0.188,0.052	0.945,0.524,0.507,0.228,0.2,0.009,0.309,0.532,0.019,0.058,0.0,0.0,0.19,0.683,0.58,0.244,0.539,1.0,0.148,0.105,0.091,0.118,0.0,0.095,0.079,0.0,0.051,0.0,0.0,0.0
NM_173237.1592_1622	...((((..((......)).))))......	.......((((..(((......))))))).	0.595,0.78,0.564,0.318,0.189,0.352,0.108,0.135,0.128,0.459,0.229,0.197,0.067,0.049,0.087,0.066,0.301,0.062,0.072,0.169,0.215,0.241,0.178,0.257,0.463,0.209,0.295,0.378,0.498,0.422	0.329,0.625,0.443,0.144,0.618,0.222,0.015,0.0,0.038,0.588,0.056,0.052,0.069,0.008,0.0,0.047,0.146,0.07,0.0,0.073,0.127,0.181,0.109,0.237,0.181,0.15,0.137,0.163,0.506,0.403
NM_173243.1967_1997	........((((....(((...))))))).	..........(((..((((...)))).)))	0.778,0.615,1.0,0.216,0.244,0.0,0.123,0.628,0.387,0.116,0.251,0.141,0.302,0.374,0.48,0.819,0.481,0.061,0.148,0.285,0.405,0.557,0.393,0.36,0.172,0.108,0.352,0.301,0.515,0.416	0.41,0.631,0.679,0.0,0.004,0.0,0.165,0.249,0.513,0.097,0.094,0.035,0.061,0.364,0.367,0.457,0.245,0.0,0.204,0.491,0.323,0.177,0.204,0.074,0.0,0.059,0.303,0.094,0.214,0.213
NM_182893.1480_1510	...(((......)))....(((.....)))	...(((......)))...............	0.037,0.152,0.691,0.051,0.009,0.257,0.128,0.693,0.22,0.409,1.0,0.488,0.517,0.635,0.416,0.52,0.185,0.925,0.44,0.476,0.0,0.401,0.489,0.525,1.0,0.519,0.0,0.049,0.13,0.172	0.0,0.271,0.352,0.102,0.219,0.0,0.101,0.22,0.14,0.538,0.944,0.247,0.189,0.49,0.224,0.108,0.16,0.514,0.301,0.789,0.021,0.23,0.733,0.642,0.82,0.656,0.027,0.0,0.096,0.286
NM_183072.2700_2730	...((((...................))))	...(((((((..........)))...))))	0.268,0.265,0.291,0.184,0.198,0.161,0.187,0.391,0.529,0.606,0.448,0.376,0.983,0.54,0.258,0.837,0.295,0.191,0.568,0.281,0.232,0.112,0.107,0.095,0.156,0.126,0.05,0.034,0.083,0.098	0.146,0.201,0.127,0.041,0.078,0.031,0.166,0.384,0.411,0.471,0.395,0.359,1.0,0.497,0.386,0.965,0.268,0.249,0.683,0.211,0.107,0.068,0.056,0.076,0.035,0.039,0.017,0.0,0.05,0.112
NM_194408.2332_2362	...((.............))(((....)))	................((((.....)))).	0.645,0.95,0.991,0.479,0.469,0.36,0.666,0.219,0.469,0.425,0.051,0.673,0.424,0.359,0.02,0.915,0.858,0.836,0.181,0.199,0.145,0.039,0.435,0.649,0.642,0.261,0.22,0.149,0.001,0.053	0.312,0.547,0.587,0.193,0.298,0.059,0.666,0.096,0.403,0.112,0.118,0.23,0.512,0.493,0.236,1.0,0.594,0.333,0.132,0.169,0.087,0.378,0.541,0.403,0.529,0.335,0.143,0.094,0.042,0.0
NM_198209.950_980	....((..((((..........))))..))	...((((((.......)))...))).....	0.058,0.423,0.41,0.179,0.616,0.344,0.201,0.299,0.454,0.049,0.32,0.669,0.202,0.477,0.155,0.61,0.44,0.509,0.42,0.51,0.437,0.299,0.555,0.383,0.106,0.112,0.0,0.281,0.26,0.074	0.017,0.101,0.188,0.081,0.277,0.282,0.119,0.124,0.224,0.082,0.355,0.403,0.289,0.576,0.228,0.631,0.391,0.233,0.334,0.866,0.347,0.203,0.196,0.126,0.123,0.032,0.0,0.069,0.561,0.153
NM_198363.1564_1594	..((((.((((....))))..)).))....	.((((((((((....)))...))..)))))	0.156,0.339,0.402,0.116,0.318,0.16,0.103,0.185,0.147,0.352,0.51,0.44,0.566,0.131,0.179,0.277,0.157,0.468,1.0,0.215,0.183,0.093,0.414,0.142,0.273,0.395,0.321,0.502,0.28,0.633	0.085,0.217,0.223,0.01,0.143,0.03,0.09,0.104,0.164,0.28,0.198,0.293,0.403,0.115,0.105,0.0,0.184,0.178,0.669,0.026,0.0,0.101,0.176,0.119,0.0,0.33,0.145,0.241,0.19,0.314
NM_198375.1674_1704	............(((...))).........	.........((((......)))).......	0.439,0.874,0.581,0.183,0.215,0.216,0.103,0.0,0.018,0.707,0.0,0.112,0.0,0.107,0.026,0.0,0.432,0.41,0.12,0.165,0.693,1.0,0.85,0.406,0.532,0.3,0.986,0.507,0.0,0.052	0.455,0.609,0.462,0.157,0.127,0.169,0.25,0.0,0.108,0.538,0.032,0.0,0.0,0.0,0.0,0.04,0.158,0.221,0.182,0.14,0.383,0.806,0.458,0.211,0.787,0.494,0.554,0.231,0.172,0.0
NM_198808.1448_1478	.......((((.....))))..........	.(((...((((.....))))))).......	0.428,0.633,0.676,0.334,0.0,0.096,0.37,0.641,0.265,0.13,0.548,0.461,0.414,0.507,0.461,0.184,0.171,0.326,0.397,0.36,0.259,0.602,0.281,0.493,0.323,0.787,0.567,0.288,0.333,0.661	0.031,0.221,0.288,0.233,0.566,0.093,0.282,0.292,0.1,0.237,1.0,0.815,0.614,0.65,0.419,0.213,0.048,0.121,0.401,0.232,0.304,0.448,0.196,0.755,0.649,0.749,0.216,0.017,0.282,0.23
NM_198911.1881_1911	((((((.....)).))))............	((((((.....)).)))).(((...)))..	0.517,0.463,0.449,0.287,0.165,0.103,0.101,0.867,0.714,0.549,0.731,0.48,0.699,0.601,0.174,0.286,0.527,1.0,0.341,0.168,0.295,0.058,0.234,0.142,0.31,0.527,0.163,1.0,1.0,0.746	0.476,0.382,0.309,0.139,0.243,0.0,0.33,0.699,0.979,0.601,0.242,0.337,0.777,0.311,0.14,0.327,0.688,0.93,0.272,0.077,0.107,0.096,0.13,0.041,0.168,0.163,0.202,0.993,1.0,0.36
NM_199516.1419_1449	.(((.....)))..................	.(((.....)))((((...)))).......	0.151,0.054,0.186,0.135,0.091,0.27,0.165,0.075,0.166,0.145,0.234,0.303,0.358,0.243,0.756,0.438,0.037,0.359,0.52,0.637,0.253,0.354,0.355,1.0,0.302,0.102,0.085,0.195,0.629,0.222	0.066,0.0,0.143,0.098,0.187,0.076,0.109,0.0,0.038,0.059,0.154,0.152,0.34,0.111,0.583,0.292,0.071,0.195,0.447,0.525,0.072,0.159,0.536,0.947,0.159,0.0,0.0,0.099,0.408,0.175
NM_199518.824_854	...((........))((....)).......	..((..(((..((...))..)))..))...	0.568,0.338,0.212,0.019,0.0,0.0,0.0,0.05,0.0,0.0,0.0,0.106,0.225,0.0,0.108,0.139,0.247,0.191,0.261,0.221,0.432,0.172,0.15,0.172,0.109,0.282,0.218,0.112,0.235,0.283	1.0,1.0,0.408,0.032,0.007,0.014,0.0,0.0,0.0,0.0,0.068,0.078,0.213,0.0,0.06,0.253,0.468,0.127,0.453,0.794,0.66,0.228,0.301,0.0,0.0,0.0,0.0,0.0,0.148,0.583
NM_199536.1442_1472	((((..........))))............	......(((..(((.......)))..))).	0.722,0.641,0.883,0.472,0.916,0.03,0.548,0.441,0.762,0.341,0.325,0.238,0.078,0.631,0.428,0.0,0.191,0.096,0.323,0.296,0.494,0.61,0.813,0.939,1.0,0.254,0.238,0.258,0.0,0.234	0.498,0.416,0.573,0.203,0.925,0.005,0.385,0.258,0.54,0.334,0.144,0.125,0.0,0.42,0.333,0.087,0.002,0.274,0.302,0.261,0.211,0.555,0.717,1.0,1.0,0.13,0.0,0.125,0.122,0.0
NM_199548.1150_1180	..((((...................)))).	.(((((...................)))))	0.754,0.614,0.528,0.29,0.376,0.12,0.396,0.732,0.647,0.993,0.36,0.298,0.541,0.439,0.487,0.193,0.228,0.479,0.889,0.284,0.858,0.336,0.101,0.54,0.137,0.161,0.132,0.181,0.287,0.664	0.603,0.439,0.355,0.12,0.518,0.086,0.388,0.39,0.466,0.823,0.0,0.281,0.19,0.329,0.383,0.021,0.33,0.261,0.492,0.255,0.459,0.112,0.036,0.168,0.0,0.0,0.0,0.154,0.189,0.631
NM_199559.1681_1711	..............................	......((((((....))))))........	0.597,0.669,1.0,0.373,0.512,0.542,0.208,0.624,0.617,0.75,0.433,0.483,0.723,1.0,0.188,0.927,0.318,0.922,0.486,0.599,0.492,0.562,0.566,0.752,0.609,1.0,0.138,0.341,0.193,0.321	0.374,0.31,0.565,0.238,0.391,0.014,0.093,0.567,0.533,0.338,0.372,0.582,0.726,0.602,0.145,0.46,0.389,0.963,0.407,0.315,0.343,0.278,0.869,0.806,0.645,0.937,0.081,0.248,0.105,0.153
NM_199562.1429_1459	..((((((......)).)))).........	...(((....(((.....))).....))).	0.732,0.839,0.911,0.363,0.307,0.221,0.203,0.73,1.0,0.92,0.687,0.192,0.098,0.104,0.088,0.417,0.851,0.456,0.184,0.457,0.045,0.359,0.222,0.245,1.0,0.305,0.437,0.489,0.506,0.713	0.407,0.757,0.872,0.246,0.579,0.0,0.374,1.0,1.0,0.634,0.4,0.0,0.0,0.041,0.065,0.395,0.814,0.258,0.054,0.208,0.062,0.13,0.306,0.263,0.538,0.154,0.356,0.373,0.818,0.582
NM_199570.542_572	...((........(((.....)))))....	...((.((.(..........))).))....	0.261,0.258,0.922,0.205,0.0,0.175,0.446,0.24,0.145,0.464,0.42,0.535,0.461,0.384,0.449,1.0,0.826,0.485,0.201,0.275,0.477,0.062,0.0,0.0,0.024,0.082,0.346,0.332,0.534,0.466	0.182,0.422,0.403,0.221,0.611,0.221,1.0,0.603,0.299,0.823,0.323,0.978,0.698,0.527,0.951,1.0,1.0,0.514,0.351,0.365,0.504,0.257,0.049,0.148,0.0,0.025,0.081,0.352,0.743,0.239
NM_199585.1301_1331	..((((((.....)))..........))).	...(((.((.((......)))).)))....	0.156,0.131,0.518,0.151,0.414,0.108,0.076,0.429,0.717,0.0,0.113,0.038,0.064,0.109,0.102,0.336,0.511,0.885,1.0,1.0,0.85,1.0,0.425,0.48,0.061,0.171,0.187,0.0,0.019,0.094	0.0,0.07,0.183,0.055,0.193,0.031,0.089,0.228,0.255,0.005,0.031,0.0,0.035,0.012,0.105,0.43,0.996,0.711,1.0,1.0,1.0,1.0,0.368,0.184,0.032,0.069,0.177,0.029,0.004,0.034
NM_199625.2723_2753	...((((..................)))).	...((((((.((....)).))....)))).	1.0,0.993,1.0,0.199,0.491,0.228,0.222,0.331,0.403,0.402,0.514,0.476,0.85,0.454,0.225,0.183,0.298,0.859,0.804,0.345,0.609,1.0,0.989,0.502,0.638,0.346,0.543,0.278,0.0,0.415	1.0,0.799,0.572,0.151,0.615,0.097,0.109,0.015,0.252,0.218,0.253,0.539,0.262,0.209,0.078,0.031,0.074,0.263,0.609,0.386,0.816,1.0,0.848,0.249,0.469,0.245,0.459,0.135,0.0,0.357
NM_199665.1855_1885	((((.....(((........)))))))...	((((.....(((((....)))))))))...	0.567,0.06,0.293,0.113,0.148,0.169,0.232,0.25,0.047,0.109,0.221,0.377,0.364,0.457,0.852,0.63,0.29,0.285,0.606,0.306,0.161,0.231,0.407,0.053,0.595,0.242,1.0,0.4,0.57,0.205	0.348,0.053,0.0,0.063,0.18,0.0,0.082,0.185,0.0,0.01,0.0,0.319,0.101,0.245,0.543,0.0,0.099,0.069,0.221,0.047,0.0,0.109,0.0,0.0,0.152,0.129,0.194,0.125,0.095,0.032
NM_199666.1564_1594	..(((.((.((.....))...)).)))...	.((((.((.((.....))...)).))))..	0.593,0.73,0.913,0.283,0.485,0.175,0.072,0.333,0.201,0.1,0.198,0.183,0.408,0.675,0.185,0.624,0.6,0.718,0.547,1.0,0.98,0.952,0.256,0.366,0.349,0.287,0.546,0.641,1.0,0.771	0.448,0.577,0.494,0.313,0.185,0.0,0.0,0.064,0.038,0.108,0.088,0.089,0.347,0.379,0.0,0.402,0.422,0.732,0.589,1.0,0.638,0.716,0.126,0.195,0.158,0.37,0.531,0.572,1.0,0.953
NM_199673.3436_3466	.((....)).(((((..........)))))	..........(((((..........)))))	-1,-1,-1,-1,-1,0.617,0.57,0.331,0.114,0.392,0.286,0.354,0.056,0.28,0.165,0.249,0.667,0.325,0.433,0.414,0.17,0.765,0.218,0.19,0.219,0.172,0.049,0.075,0.159,0.517	0.503,0.172,0.54,0.191,0.714,0.204,0.365,0.237,0.0,0.281,0.168,0.098,0.065,0.132,0.433,0.179,0.53,0.5,0.266,0.122,0.346,0.498,0.242,0.045,0.08,0.044,0.01,0.257,0.027,0.023
NM_199686.2992_3022	...((((.............))))......	.((((((.............))))))....	0.652,0.788,0.594,0.16,0.386,0.285,0.358,0.616,0.616,0.174,0.281,0.14,0.001,0.247,0.499,0.215,0.189,0.421,0.63,0.604,0.41,0.282,0.665,0.753,0.98,0.529,0.39,0.272,0.318,0.307	0.842,0.833,0.402,0.021,0.293,0.084,0.231,0.938,0.762,0.162,0.201,0.008,0.045,0.057,0.402,0.284,0.0,0.452,0.404,0.372,0.202,0.28,0.71,0.663,1.0,0.431,0.232,0.166,0.111,0.11
NM_199698.1029_1059	..............................	.........(((......))).........	1.0,0.429,0.331,0.208,0.618,0.401,0.397,0.087,0.297,0.484,0.405,0.265,1.0,0.961,0.775,0.677,0.565,1.0,0.816,0.261,0.736,0.386,1.0,0.44,0.036,0.043,0.373,0.205,0.275,0.311	0.492,1.0,0.447,0.176,0.43,0.123,0.0,0.0,0.055,0.098,0.116,0.167,0.47,0.523,0.63,0.615,0.134,0.288,0.273,0.791,0.227,0.343,0.645,0.09,0.028,0.0,0.0,0.0,0.257,0.0
NM_199707.2667_2697	...............(((.....)))....	........((...(((...)))....))..	0.888,0.71,0.727,0.378,0.108,0.179,0.273,0.249,0.31,0.285,0.301,0.567,0.315,0.585,0.0,0.0,0.133,0.329,0.593,0.308,0.172,0.064,0.2,0.127,0.071,0.153,0.197,0.145,0.443,1.0	1.0,0.579,0.596,0.163,0.354,0.053,0.117,0.484,0.138,0.362,0.401,0.565,0.261,0.39,0.0,0.0,0.117,0.318,0.315,0.056,0.066,0.035,0.084,0.185,0.047,0.021,0.11,0.063,0.618,1.0
NM_199707.2794_2824	(((((((......))..))......)))..	((((....(((....)))......))))..	0.079,0.235,0.647,0.255,0.0,0.093,0.111,0.409,0.243,0.251,0.369,0.064,0.12,0.0,0.212,0.04,0.0,0.018,0.056,0.237,0.28,0.423,0.037,0.074,0.357,0.253,0.0,0.205,0.032,0.062	0.084,0.125,0.502,0.122,0.0,0.0,0.093,0.006,0.084,0.247,0.211,0.02,0.035,0.052,0.0,0.015,0.005,0.0,0.0,0.0,0.099,0.187,0.035,0.082,0.194,0.055,0.0,0.106,0.0,0.0
NM_199729.1692_1722	.....((((.......))))..........	.....((((((..........))))))...	0.816,0.731,0.754,0.254,0.238,0.024,0.158,0.294,0.151,0.235,0.217,0.408,0.25,0.042,0.015,0.067,0.251,0.247,0.272,0.385,0.519,0.23,0.656,0.421,0.723,0.428,0.396,0.274,0.121,0.645	0.468,0.226,0.189,0.062,0.127,0.0,0.0,0.09,0.016,0.063,0.058,0.336,0.239,0.01,0.147,0.021,0.179,0.233,0.316,0.63,0.534,0.437,0.784,0.309,0.516,0.51,0.286,0.158,0.31,0.473
NM_199734.914_944	..............................	.(((...))).((((..........)).))	0.098,0.104,0.364,0.141,0.262,0.473,0.258,0.358,0.57,0.32,1.0,0.603,0.183,0.375,0.214,0.348,0.775,0.742,1.0,0.491,0.499,0.871,0.397,0.166,0.402,0.223,0.535,0.535,0.316,0.253	0.0,0.0,0.0,0.0,0.169,0.0,0.116,0.015,0.294,0.358,0.989,0.188,0.133,0.02,0.134,0.176,0.351,0.717,0.876,0.175,0.515,0.615,0.178,0.0,0.245,0.257,0.358,0.375,0.317,0.197
NM_199743.1794_1824	..(((.((.............)))))....	.(((....((.((((.....)))).)))))	0.283,0.177,0.209,0.02,0.0,0.05,0.113,0.593,0.222,0.461,0.317,0.263,0.047,0.352,0.576,0.468,0.322,0.097,0.161,0.412,0.43,0.082,0.0,0.02,0.0,0.157,0.0,0.023,0.025,0.084	0.062,0.2,0.0,0.012,0.008,0.0,0.041,0.196,0.105,0.171,0.212,0.099,0.0,0.071,0.133,0.191,0.0,0.0,0.028,0.186,0.054,0.01,0.0,0.0,0.014,0.0,0.0,0.0,0.0,0.0
NM_199766.1272_1302	...((...(((....))).)).........	.(((........))).((....))......	0.125,0.005,0.032,0.066,0.0,0.11,0.089,0.039,0.028,0.005,0.042,0.073,0.0,0.107,0.108,0.076,0.091,0.11,0.236,0.235,0.206,0.205,0.435,0.595,0.202,0.245,0.108,0.534,1.0,0.1	0.0,0.078,0.025,0.0,0.003,0.0,0.0,0.0,0.0,0.0,0.004,0.0,0.0,0.0,0.0,0.0,0.0,0.018,0.067,0.062,0.134,0.001,0.108,0.34,0.143,0.228,0.12,0.544,0.758,0.0
NM_199767.2403_2433	.......((((.(((...))).))))....	..............................	0.282,0.364,0.195,0.064,0.377,0.074,0.263,0.116,0.346,0.401,0.456,0.758,0.917,0.392,0.203,0.056,0.192,0.041,0.564,0.356,0.211,0.199,0.515,0.54,-1,0.509,0.33,0.442,-1,-1	0.251,0.399,0.147,0.191,0.075,0.051,0.038,0.211,0.184,0.118,0.196,0.588,0.748,0.246,0.192,0.055,0.098,0.0,0.523,0.183,0.279,0.152,0.432,0.81,1.0,0.341,0.382,0.343,0.294,0.27
NM_199769.1507_1537	...........((((......)))).....	......(((((((...))))).))......	0.41,0.378,0.739,0.337,0.498,0.363,0.171,0.3,0.231,0.439,0.6,0.084,0.081,0.413,0.209,0.26,0.32,0.4,0.371,0.123,0.211,0.347,0.046,0.375,0.251,0.533,0.422,0.12,0.589,0.814	0.421,0.454,0.371,0.193,0.383,0.138,0.186,0.187,0.081,0.525,0.472,0.0,0.101,0.218,0.113,0.136,0.29,0.25,0.18,0.045,0.094,0.343,0.051,0.252,0.094,0.436,0.344,0.253,0.483,0.68
NM_199771.1231_1261	...((.(((......))).)).........	......(((....)))..(((....)))..	0.032,0.018,0.254,0.368,0.3,1.0,0.081,0.415,0.12,0.009,0.034,0.022,0.093,0.001,0.0,0.0,0.0,0.0,0.046,0.037,0.095,0.604,0.038,0.414,0.166,0.485,0.277,0.399,0.743,0.314	0.029,0.091,0.335,0.378,0.937,1.0,0.447,0.659,0.177,0.045,0.024,0.085,0.181,0.017,0.003,0.003,0.008,0.047,0.039,0.0,0.012,0.665,0.212,0.431,0.283,0.523,0.554,0.554,0.885,0.214
NM_199799.1300_1330	.......((((............))))...	.(((...(((......))))))........	0.153,0.157,0.429,0.048,0.128,0.061,0.122,0.371,0.261,0.012,0.391,0.593,0.503,0.453,0.053,0.336,0.216,0.26,0.057,0.285,0.187,0.489,0.39,0.692,0.507,0.0,0.344,0.271,0.021,0.156	0.174,0.156,0.203,0.075,0.196,0.0,0.046,0.144,0.129,0.133,0.217,0.331,0.491,0.262,0.001,0.084,0.061,0.081,0.015,0.15,0.182,0.262,0.292,0.627,0.055,0.113,0.469,0.095,0.141,0.041
NM_199824.1332_1362	.............(((.((.....))))).	.............((.(((.....))))).	0.502,0.448,0.747,0.265,0.144,0.327,0.204,0.644,0.479,0.0,0.594,0.27,0.493,0.337,0.407,0.788,0.324,0.843,0.265,0.611,0.755,0.714,0.595,0.18,0.082,0.061,0.068,0.121,0.083,0.061	0.276,0.238,0.252,0.142,0.143,0.132,0.15,0.645,0.095,0.327,0.395,0.349,0.853,0.116,0.4,0.686,0.135,0.355,0.159,0.609,0.844,0.213,0.356,0.014,0.0,0.0,0.0,0.137,0.343,0.065
NM_199842.1269_1299	..............................	.(((.................)))......	0.19,0.229,0.722,0.459,1.0,0.256,0.19,0.375,0.09,0.187,0.172,0.056,0.116,0.182,0.119,0.325,0.065,0.164,0.332,0.216,0.263,0.147,0.234,0.304,0.723,0.825,0.681,0.395,0.348,0.669	0.072,0.267,0.636,0.253,1.0,0.127,0.147,0.217,0.0,0.215,0.085,0.049,0.0,0.0,0.0,0.036,0.0,0.0,0.283,0.0,0.064,0.0,0.149,0.31,0.482,0.38,0.356,0.156,0.312,0.369
NM_199872.1672_1702	...((((..............)))).....	...((((((((....))))..)))).....	0.13,0.114,0.477,0.268,0.265,0.215,0.063,0.347,0.292,0.405,0.141,0.449,0.167,0.685,0.672,0.676,0.338,0.521,0.33,0.396,0.542,0.2,0.194,0.482,0.311,0.187,0.378,0.863,0.553,1.0	0.034,0.059,0.041,0.099,0.166,0.0,0.097,0.158,0.449,0.112,0.163,0.173,0.137,0.406,0.718,0.221,0.115,0.348,0.319,0.171,0.176,0.071,0.117,0.315,0.105,0.0,0.257,0.478,0.51,0.779
NM_199875.1087_1117	(((....................)))....	...(((.................)))....	0.377,0.18,0.194,0.056,0.226,0.529,0.188,0.212,0.127,0.155,0.448,0.493,0.323,0.237,0.543,0.509,0.464,0.78,0.262,0.494,0.461,0.345,0.516,0.498,0.206,0.081,0.81,0.284,0.224,0.804	0.113,0.382,0.225,0.066,0.077,0.026,0.0,0.04,0.0,0.0,0.247,0.544,0.131,0.117,0.285,0.357,0.598,0.144,0.319,0.443,0.238,0.459,0.217,0.321,0.107,0.04,0.72,0.385,0.235,0.866
NM_199888.1644_1674	....(((......))).(((......))).	....(((......)))((((.....)))).	0.656,0.833,0.694,0.4,0.495,0.002,0.217,0.422,0.228,0.64,0.184,0.38,0.502,0.23,0.192,0.592,0.039,0.159,0.233,0.16,0.197,0.35,0.029,0.644,0.033,0.164,0.336,0.162,0.215,0.412	0.56,0.417,0.413,0.246,0.418,0.007,0.159,0.182,0.438,0.267,0.324,0.231,0.403,0.112,0.148,0.418,0.03,0.0,0.061,0.264,0.048,0.059,0.026,0.421,0.06,0.203,0.0,0.041,0.359,0.04
NM_199898.2734_2764	....(((((...))))).............	.((((((((...))))).......)))...	0.422,0.286,0.374,0.14,0.0,0.062,0.0,0.122,0.139,0.347,0.381,0.288,0.14,0.306,0.017,0.059,0.112,0.338,0.189,1.0,0.876,1.0,0.282,0.11,0.108,0.0,0.149,0.103,0.23,0.332	0.342,0.104,0.073,0.015,0.163,0.0,0.029,0.08,0.132,0.151,0.039,0.196,0.032,0.232,0.02,0.048,0.04,0.37,0.309,0.615,0.662,0.935,0.04,0.0,0.057,0.072,0.025,0.108,0.093,0.043
NM_199933.3050_3080	..((((.((....)).))))..........	..((((.((....)).))))((.....)).	0.864,0.599,0.239,0.111,0.12,0.109,0.123,0.325,0.227,0.62,0.581,0.718,1.0,0.448,0.432,0.543,0.12,0.211,0.268,0.202,0.531,0.391,0.394,0.265,0.203,0.247,0.123,0.221,0.129,0.068	0.643,0.378,0.132,0.042,0.145,0.0,0.199,0.21,0.264,0.482,0.482,0.6,1.0,0.458,0.348,0.265,0.126,0.046,0.26,0.074,0.409,0.185,0.213,0.038,0.064,0.159,0.09,0.15,0.073,0.028
NM_200089.2501_2531	((((..........))))............	.(((...)))....((((....))))....	0.012,0.0,0.039,0.108,0.112,0.169,0.059,0.104,0.176,0.158,0.0,0.036,0.0,0.132,0.28,0.073,0.125,0.153,0.124,0.216,0.717,0.366,0.0,0.479,0.653,0.521,1.0,0.248,0.396,0.57	0.004,0.0,0.056,0.075,0.097,0.055,0.0,0.0,0.056,0.0,0.0,0.0,0.0,0.032,0.068,0.0,0.042,0.028,0.123,0.062,0.555,0.135,0.0,0.131,0.277,0.4,0.977,0.145,0.209,0.24
NM_200089.2674_2704	.((((((.......))))).).........	.......(((.((((...)))).)))....	0.805,0.378,0.463,0.113,0.516,0.334,0.569,0.136,0.455,0.051,0.179,0.38,0.468,0.596,0.131,0.056,0.199,0.0,0.376,0.239,0.205,0.275,0.096,0.274,0.301,0.089,0.044,0.122,0.114,0.102	0.468,0.324,0.261,0.1,0.621,0.122,0.32,0.013,0.202,0.0,0.0,0.113,0.143,0.347,0.0,0.0,0.082,0.0,0.032,0.08,0.051,0.013,0.014,0.009,0.014,0.01,0.0,0.002,0.0,0.033
NM_200099.880_910	.....(((......))).............	.((.((....)).)).(((((....)))))	1.0,1.0,0.764,0.743,0.233,0.116,0.54,0.651,0.233,0.479,0.192,0.595,0.464,0.437,0.218,0.294,0.47,1.0,0.215,0.05,0.073,0.327,0.171,1.0,0.317,0.233,0.735,0.427,0.766,0.252	0.531,0.456,0.52,0.215,0.509,0.0,0.474,0.447,0.224,0.307,0.131,0.21,0.206,0.071,0.135,0.188,0.776,0.551,0.0,0.0,0.0,0.054,0.097,0.755,0.254,0.108,0.278,0.271,0.699,0.25
NM_200101.1751_1781	.(((((......))))).............	.(((((......))))).((((...)))).	0.681,0.303,0.418,0.191,0.347,0.351,0.321,0.46,0.568,0.351,1.0,0.649,0.634,0.151,0.446,0.237,0.402,0.264,0.778,0.928,0.518,0.599,0.707,0.456,0.43,0.183,0.354,0.28,0.269,0.247	0.363,0.071,0.175,0.119,0.15,0.08,0.29,0.047,0.294,0.288,0.662,0.222,0.344,0.173,0.193,0.036,0.224,0.176,0.725,0.435,0.278,0.487,0.596,0.38,0.252,0.111,0.268,0.169,0.111,0.111
NM_200128.1652_1682	.((((........)))).(.....).....	.(((((......))))).(.....).....	0.14,0.077,0.358,0.0,0.343,0.529,1.0,0.461,0.095,0.335,0.152,0.623,1.0,0.671,0.547,0.4,0.556,0.445,0.306,0.734,1.0,0.464,0.709,0.103,1.0,0.574,1.0,0.921,0.065,0.137	0.0,0.01,0.263,0.048,0.135,0.144,0.433,0.171,0.222,0.217,0.053,0.391,0.847,0.898,0.332,0.369,0.809,0.428,0.655,0.935,1.0,0.643,0.751,0.465,1.0,0.809,1.0,1.0,0.161,0.185
NM_200152.2120_2150	.......(((((((...)))..))))....	.((.(((........))).)).........	1.0,0.824,0.52,0.556,0.461,0.268,0.133,0.05,0.0,0.077,0.184,0.19,0.182,0.077,0.165,0.119,0.351,0.114,0.311,0.302,0.27,0.33,0.263,0.343,0.16,0.258,0.186,0.177,0.341,0.64	1.0,0.687,0.483,0.417,0.077,0.0,0.018,0.11,0.283,0.009,0.089,0.054,0.013,0.0,0.08,0.001,0.0,0.075,0.001,0.21,0.033,0.156,0.315,0.036,0.222,0.244,0.178,0.116,0.288,0.0
NM_200240.1708_1738	..................((....))....	..................((......))..	0.225,0.0,0.151,0.033,0.0,0.048,0.0,0.001,0.0,0.062,0.143,0.035,0.272,0.05,0.136,0.069,0.019,0.072,0.056,0.058,0.0,0.114,0.0,0.107,0.0,0.0,0.036,0.049,0.0,0.137	0.246,0.048,0.074,0.03,0.001,0.049,0.0,0.049,0.105,0.097,0.114,0.428,0.066,0.235,0.252,0.0,0.0,0.0,0.089,0.02,0.0,0.0,0.0,0.053,0.0,0.065,0.0,0.143,0.022,0.0
NM_200259.992_1022	.......((..((((........)))).))	((((.((....)).))))............	0.249,0.196,0.674,0.041,0.568,0.278,0.0,0.253,0.287,0.314,0.69,0.483,0.444,0.11,0.485,0.596,0.13,0.508,0.755,0.686,1.0,0.713,0.838,0.576,0.683,0.408,0.029,0.111,0.24,0.306	0.0,0.1,0.602,0.089,0.405,0.025,0.054,0.006,0.179,0.275,0.161,0.356,0.104,0.213,0.167,0.332,0.074,0.457,0.627,0.467,0.826,0.566,0.462,0.42,0.67,0.203,0.011,0.031,0.062,0.411
NM_200286.932_962	..(((((..............)))))....	..(((((.((.......))..)))))....	0.478,0.245,0.388,0.197,0.218,0.0,0.311,0.18,0.332,0.389,0.522,0.748,0.216,1.0,1.0,1.0,0.164,0.528,0.121,0.408,0.293,0.059,0.0,0.007,0.327,0.239,0.197,0.39,0.211,0.126	0.124,0.314,0.127,0.045,0.136,0.086,0.075,0.032,0.076,0.064,0.541,0.27,0.0,0.952,0.67,0.676,0.352,0.526,0.24,0.366,0.34,0.123,0.04,0.0,0.0,0.0,0.132,0.359,0.169,0.202
NM_200304.1510_1540	.((((...((....))....))))......	......((.((((((...))))))))....	0.367,0.435,0.487,0.173,0.334,0.367,0.246,0.369,0.04,0.257,0.384,0.884,0.341,0.156,0.287,0.085,0.129,0.257,0.071,0.197,0.005,0.309,0.125,0.202,0.147,0.413,0.273,0.252,0.372,0.39	0.146,0.189,0.161,0.087,0.149,0.08,0.062,0.214,0.009,0.074,0.438,0.53,0.16,0.0,0.084,0.0,0.093,0.088,0.053,0.111,0.019,0.082,0.019,0.071,0.044,0.191,0.059,0.057,0.092,0.004
NM_200332.1616_1646	............((((........))))..	(((......)))((((........))))..	0.822,0.705,0.926,0.51,0.854,0.593,0.354,0.242,0.994,0.557,0.601,0.709,0.344,0.331,0.79,0.708,1.0,0.585,0.802,0.545,1.0,1.0,0.357,0.16,0.205,0.154,0.105,0.52,0.439,0.774	0.47,0.357,0.624,0.381,0.657,0.489,0.136,0.423,0.749,0.095,0.263,0.398,0.066,0.211,0.476,0.907,1.0,1.0,0.425,0.46,1.0,1.0,0.255,0.12,0.078,0.128,0.024,0.213,0.317,0.187
NM_200332.2285_2315	..((((.....))))...............	..((((.....))))((((.....))))..	0.432,0.326,1.0,0.232,0.162,0.0,0.196,0.078,0.559,0.84,0.436,0.654,0.223,0.38,0.303,0.715,0.802,0.998,0.787,1.0,1.0,1.0,0.544,0.321,1.0,0.741,0.118,0.497,0.226,0.511	0.259,0.17,0.455,0.114,0.087,0.0,0.0,0.216,0.587,0.148,0.311,0.2,0.0,0.03,0.25,0.536,0.57,0.533,0.753,0.689,1.0,1.0,0.364,0.272,0.904,0.329,0.0,0.0,0.378,0.293
NM_200467.1150_1180	......(((..((((...))))..)))...	......(((.(((((...))))).)))...	0.45,0.343,0.426,0.237,0.227,0.058,0.184,0.361,0.082,0.925,0.713,0.554,0.314,0.212,0.288,0.044,0.201,0.178,0.054,0.052,0.233,0.425,0.623,0.271,0.31,0.5,0.504,0.162,0.153,0.278	0.357,0.515,0.353,0.272,0.41,0.0,0.268,0.297,0.265,1.0,0.493,0.425,0.183,0.209,0.087,0.0,0.05,0.064,0.0,0.034,0.118,0.225,0.371,0.113,0.109,0.227,0.394,0.054,0.041,0.136
NM_200517.920_950	...(((.((............))...))).	.......((((.(((....)))..))))..	0.597,0.498,0.705,0.314,0.048,0.323,0.147,0.252,0.61,0.609,0.742,1.0,1.0,1.0,1.0,1.0,1.0,1.0,0.426,0.543,0.748,0.514,0.315,0.446,0.113,0.067,0.147,0.231,0.326,0.04	0.307,0.166,0.305,0.146,0.057,0.206,0.0,0.01,0.274,0.527,0.679,1.0,0.631,0.784,0.946,1.0,1.0,0.786,0.162,0.469,0.318,0.362,0.387,0.287,0.077,0.041,0.1,0.093,0.429,0.02
NM_200520.478_508	...(((((.........)))))........	.(((((((.........))))).)).....	0.393,0.419,0.435,0.141,0.324,0.115,0.132,0.336,0.386,0.327,0.492,1.0,0.72,0.751,0.479,0.49,0.363,0.141,0.076,0.052,0.097,0.141,0.267,0.176,0.215,0.699,0.398,0.518,0.827,0.514	0.234,0.274,0.207,0.01,0.155,0.054,0.104,0.138,0.515,0.197,0.444,1.0,0.944,0.878,0.323,0.29,0.283,0.071,0.069,0.008,0.058,0.126,0.23,0.155,0.173,0.332,0.347,0.603,0.913,0.872
NM_200607.1524_1554	...((............))...........	((.((............)))).........	0.39,0.267,0.351,0.22,0.0,0.008,0.084,0.064,0.039,0.083,0.08,0.315,0.645,0.489,0.445,0.136,0.422,0.098,0.015,0.374,0.416,0.479,0.82,0.202,0.088,0.213,0.202,0.266,0.397,0.52	0.265,0.245,0.178,0.029,0.038,0.04,0.0,0.038,0.0,0.0,0.0,0.227,0.454,0.435,0.009,0.034,0.211,0.082,0.033,0.205,0.24,0.195,0.461,0.12,0.0,0.139,0.059,0.163,0.299,0.337
NM_200643.1700_1730	..............................	..((.(((..........))).))......	0.519,0.396,0.39,0.173,0.248,0.292,0.165,0.273,0.51,0.874,1.0,0.441,0.0,0.242,0.321,0.751,0.205,0.251,1.0,0.37,1.0,0.533,0.177,0.217,0.401,0.497,0.082,0.133,0.026,0.095	0.506,0.334,0.173,0.094,0.238,0.161,0.183,0.445,0.681,1.0,1.0,0.243,0.084,0.11,0.256,0.572,0.078,0.085,0.64,0.156,0.816,0.259,0.124,0.15,0.321,0.165,0.032,0.099,0.0,0.014
NM_200650.1913_1943	...(((....)))(((((....)))))...	((((....)))).(((((....)))))...	0.681,0.496,0.375,0.031,0.091,0.046,0.041,0.175,0.381,0.311,0.61,0.426,0.408,0.112,0.07,0.182,0.142,0.148,0.098,0.063,0.545,0.408,0.159,0.341,0.25,0.124,0.557,0.423,0.676,1.0	0.673,0.307,0.186,0.038,0.0,0.0,0.0,0.03,0.229,0.122,0.279,0.296,0.186,0.006,0.066,0.048,0.0,0.0,0.0,0.037,0.221,0.203,0.04,0.156,0.028,0.08,0.31,0.324,0.571,0.809
NM_200671.2916_2946	...........(((((........))))).	..........((((((........))))))	0.134,0.122,0.246,0.078,0.297,0.298,0.207,0.204,0.868,0.879,0.815,0.655,1.0,0.804,0.292,0.712,0.351,0.235,0.0,0.254,0.121,0.036,0.057,0.167,0.529,0.09,0.042,0.081,0.131,0.457	0.0,0.0,0.0,0.07,0.446,0.0,0.277,0.241,0.33,0.445,0.603,0.424,0.593,0.77,0.278,0.621,0.129,0.312,0.057,0.083,0.0,0.0,0.15,0.007,0.218,0.342,0.019,0.147,0.17,0.452
NM_200671.2927_2957	.........(((((....))))).......	((.....))(((((....))))).......	0.655,1.0,0.804,0.292,0.712,0.351,0.235,0.0,0.254,0.121,0.036,0.057,0.167,0.529,0.09,0.042,0.081,0.131,0.457,0.03,0.03,0.066,0.024,0.293,0.52,1.0,0.017,0.049,0.124,0.104	0.424,0.593,0.77,0.278,0.621,0.129,0.312,0.057,0.083,0.0,0.0,0.15,0.007,0.218,0.342,0.019,0.147,0.17,0.452,0.102,0.0,0.129,0.0,0.566,0.52,0.894,0.133,0.078,0.112,0.304
NM_200781.1520_1550	...((........))...............	...((........))((((....))))...	0.463,0.385,0.623,0.439,0.32,0.196,0.541,0.821,0.708,0.166,0.729,0.661,0.672,0.298,0.421,0.428,0.254,0.758,0.781,0.603,1.0,1.0,0.243,0.15,0.488,0.228,0.739,0.423,1.0,1.0	0.32,0.254,0.394,0.21,0.551,0.014,0.68,0.758,0.394,0.269,0.75,0.658,0.638,0.143,0.261,0.011,0.216,0.465,0.77,0.582,1.0,0.698,0.105,0.06,0.166,0.163,0.505,0.482,1.0,1.0
NM_200885.1258_1288	(((((...)))))((((......))))...	(((((...)))))......(((...)))..	0.083,0.062,0.0,0.003,0.014,0.699,0.579,0.818,0.121,0.0,0.0,0.132,0.127,0.097,0.084,0.151,0.138,0.208,0.162,0.12,0.152,0.222,0.119,0.299,0.547,0.152,0.57,0.337,0.35,0.27	0.06,0.0,0.0,0.005,0.103,0.753,0.794,0.947,0.13,0.067,0.072,0.216,0.149,0.068,0.083,0.187,0.062,0.449,0.075,0.126,0.103,0.02,0.087,0.237,0.264,0.155,0.226,0.392,0.402,0.214
NM_200896.827_857	((((((..........)))..)))......	.(((......)))..(((.........)))	0.25,0.168,0.361,0.213,0.133,0.319,0.205,0.26,0.82,0.585,0.265,0.497,0.128,0.121,0.121,0.036,0.252,0.063,0.224,0.159,0.244,0.253,0.287,0.273,0.677,0.721,0.149,0.288,0.237,0.235	0.193,0.118,0.186,0.167,0.244,0.056,0.047,0.385,0.635,0.134,0.304,0.217,0.058,0.005,0.0,0.0,0.197,0.024,0.097,0.028,0.192,0.104,0.284,0.316,0.98,0.632,0.197,0.069,0.054,0.074
NM_200902.2777_2807	...(((((...........)).))).....	...(((.((((......)))).))).....	0.293,0.44,0.317,0.28,0.021,0.173,0.0,0.128,0.124,0.168,0.44,0.268,0.143,0.375,0.885,0.43,0.592,0.389,0.279,0.375,0.466,0.669,0.321,0.118,0.142,0.303,0.2,0.275,0.314,0.225	0.453,0.385,0.199,0.201,0.031,0.0,0.0,0.0,0.024,0.073,0.431,0.219,0.151,0.396,0.663,0.453,0.486,0.621,0.111,0.202,0.265,0.384,0.17,0.058,0.217,0.171,0.294,0.128,0.085,0.117
NM_200905.3770_3800	....(((...))).(((.........))).	.......((((.(((.....)))..)))).	1.0,1.0,1.0,0.493,1.0,0.151,0.161,0.41,0.326,0.331,0.08,0.165,0.0,0.209,0.131,0.103,0.118,0.007,0.167,0.209,0.517,0.034,0.316,0.01,0.168,0.216,0.309,0.555,0.341,0.597	1.0,1.0,0.849,0.125,0.55,0.043,0.111,0.508,0.226,0.251,0.003,0.077,0.06,0.0,0.0,0.0,0.0,0.0,0.034,0.132,0.21,0.064,0.0,0.0,0.013,0.063,0.123,0.284,0.477,0.442
NM_200907.1347_1377	..............................	.....(((...............)))....	0.484,0.398,0.44,0.195,0.155,0.178,0.175,0.135,0.534,0.021,0.943,0.532,0.45,0.139,0.612,0.679,0.145,0.776,0.551,0.573,0.923,0.689,0.874,0.823,0.876,0.46,0.424,1.0,0.416,1.0	0.428,0.234,0.253,0.083,0.288,0.118,0.022,0.034,0.225,0.072,0.563,0.77,0.108,0.261,0.653,0.61,0.196,0.757,0.31,0.468,0.431,0.525,0.467,0.416,0.634,0.074,0.354,0.781,0.832,0.963
NM_200908.2289_2319	..............................	...((...((......))...)).......	0.455,0.289,0.479,0.254,0.255,0.264,0.163,0.477,0.858,0.421,0.564,0.223,0.304,0.805,0.368,0.0,0.518,0.387,0.468,0.281,0.358,0.354,0.294,0.212,0.717,0.186,0.706,0.662,0.668,1.0	0.13,0.172,0.09,0.095,0.107,0.107,0.079,0.354,0.478,0.12,0.1,0.075,0.212,0.635,0.249,0.391,0.161,0.584,0.999,0.097,0.153,0.0,0.0,0.08,0.923,0.108,0.417,0.501,0.284,0.539
NM_200910.2128_2158	...((....))...................	....((((....((....))))))......	0.347,0.147,0.273,0.134,0.301,0.197,0.149,0.112,0.312,0.085,0.005,0.086,0.393,0.136,0.349,0.403,0.074,0.896,0.398,0.347,0.462,0.327,0.812,0.242,0.459,0.455,0.319,1.0,0.248,0.0	0.142,0.034,0.136,0.038,0.0,0.0,0.0,0.0,0.137,0.038,0.0,0.075,0.0,0.085,0.472,0.375,0.119,0.604,0.198,0.123,0.242,0.142,0.269,0.201,0.249,0.632,0.296,0.509,0.279,0.011
NM_200925.2788_2818	((((((.................)))))).	...(((((......)).)))(((....)))	0.144,0.051,0.186,0.259,0.317,0.0,0.602,0.399,0.267,0.761,0.963,0.469,0.445,0.921,0.599,0.428,1.0,0.975,0.301,0.303,0.247,1.0,0.331,0.522,0.113,0.171,0.931,0.34,0.413,0.311	0.0,0.023,0.141,0.015,0.654,0.0,0.48,0.268,0.262,0.44,1.0,0.271,0.744,0.594,0.627,0.343,0.852,0.82,0.027,0.232,0.109,0.773,0.009,0.304,0.064,0.119,0.682,0.398,0.059,0.166
NM_200938.1821_1851	..............................	...((..............)).........	0.45,0.71,0.517,0.139,0.375,0.505,0.418,0.339,0.485,0.689,1.0,1.0,0.641,0.288,0.331,0.338,0.46,0.247,0.132,0.266,0.166,0.26,0.793,0.496,0.641,0.451,0.379,0.213,0.431,0.226	0.063,0.482,0.335,0.053,0.132,0.18,0.359,0.314,0.393,0.35,0.931,1.0,0.135,0.242,0.104,0.169,0.407,0.01,0.028,0.034,0.0,0.06,0.655,0.378,0.318,0.309,0.155,0.038,0.276,0.318
NM_200962.1875_1905	.....((((((.....)))).)).......	((...((((((.....)))).))..))...	0.582,0.587,0.718,0.537,0.0,0.221,0.467,0.231,0.371,0.731,0.6,0.546,0.151,0.672,0.203,0.643,0.255,0.6,0.079,0.343,0.22,0.106,0.059,0.203,0.703,0.274,0.487,0.727,1.0,0.896	0.527,0.105,0.378,0.012,0.451,0.107,0.287,0.228,0.049,0.497,0.311,0.104,0.0,0.27,0.041,0.316,0.099,0.532,0.191,0.126,0.149,0.185,0.066,0.262,0.605,0.008,0.285,0.406,1.0,0.448
NM_200978.3650_3680	...((.......)).((((.....))))..	...((((.....((......))....))))	0.417,0.304,0.835,0.515,0.33,0.599,0.605,0.901,0.764,0.942,0.436,0.7,0.18,0.14,0.518,0.0,0.246,0.643,1.0,0.477,1.0,0.297,0.296,0.018,0.361,0.182,0.018,0.217,0.108,0.018	0.107,0.415,0.126,0.277,0.24,0.219,0.429,0.563,1.0,0.533,0.404,0.141,0.163,0.063,0.271,0.0,0.348,0.735,0.656,0.391,0.811,0.119,0.038,0.179,0.193,0.249,0.298,0.302,0.166,0.0
NM_201033.5858_5888	..............................	..........((((...........)))).	0.274,0.688,0.76,0.117,0.43,0.152,0.236,0.431,0.279,0.153,0.844,0.769,0.516,0.729,0.815,0.792,0.727,0.828,0.366,0.91,1.0,0.683,0.456,0.418,0.219,0.744,0.837,0.234,0.278,0.252	0.207,0.44,0.374,0.159,0.187,0.021,0.183,0.154,0.077,0.113,0.57,0.395,0.269,0.474,0.597,0.592,0.346,0.267,0.252,0.503,0.781,0.236,0.074,0.191,0.112,0.448,0.204,0.08,0.18,0.0
NM_201085.2543_2573	..............................	.....(((((..((...))....))).)).	0.518,0.436,0.46,0.531,0.297,0.583,0.012,0.393,0.213,0.302,0.192,0.125,0.205,0.485,0.894,1.0,0.636,0.249,0.716,0.888,0.351,0.475,0.776,1.0,0.822,0.247,0.099,0.145,0.345,0.29	0.391,0.341,0.309,0.217,0.526,0.139,0.121,0.289,0.102,0.17,0.098,0.095,0.267,0.334,0.871,1.0,0.319,0.024,0.873,0.873,0.407,0.453,0.424,1.0,1.0,0.004,0.16,0.367,0.161,0.311
NM_201085.2794_2824	...(((...(((...))).)))........	.(((((((...)))...)))).........	0.889,0.65,0.953,0.53,0.347,1.0,0.332,0.502,0.369,0.265,0.085,0.262,0.327,0.072,0.557,0.258,0.445,0.381,0.309,0.432,0.281,0.369,0.823,0.414,1.0,0.717,0.363,0.525,0.732,0.101	0.509,0.589,0.526,0.516,0.829,0.245,0.131,0.192,0.099,0.053,0.053,0.033,0.084,0.096,0.057,0.385,0.248,0.0,0.189,0.251,0.101,0.605,0.608,0.256,0.949,0.16,0.0,0.628,0.536,0.137
NM_201120.744_774	......(((......)))............	((((.........)))).............	0.987,0.516,0.917,0.169,0.148,0.287,0.047,0.215,0.189,0.461,0.126,0.157,0.218,0.242,0.165,0.415,0.198,0.251,0.411,0.285,0.541,0.681,0.564,0.365,0.78,0.275,0.693,0.133,0.949,1.0	0.429,0.207,0.254,0.0,0.211,0.032,0.165,0.118,0.022,0.209,0.119,0.182,0.194,0.122,0.223,0.116,0.18,0.13,0.184,0.073,0.254,0.436,0.198,0.068,0.159,0.002,0.224,0.392,0.755,0.626
NM_201134.1349_1379	.......((((((.........))))))..	..((.((((............)))).))..	0.208,0.116,0.353,0.173,0.232,0.005,0.184,0.17,0.343,0.321,0.575,0.12,0.469,0.597,0.847,0.579,0.535,0.718,1.0,0.638,0.133,0.137,1.0,0.508,0.345,0.193,0.173,0.281,0.166,0.015	0.0,0.115,0.12,0.098,0.241,0.0,0.0,0.0,0.416,0.746,0.332,0.31,0.58,0.456,1.0,0.921,0.535,0.596,1.0,0.35,0.26,0.262,1.0,0.418,0.406,0.319,0.122,0.035,0.0,0.077
NM_201142.2809_2839	..(((((........)).))).........	.((((((........)).))))........	0.056,0.625,0.501,0.036,0.423,0.0,0.141,0.177,0.265,0.407,0.392,0.495,0.897,0.45,0.775,0.18,0.24,0.897,0.5,0.0,1.0,0.314,0.331,0.122,0.171,0.384,0.474,0.428,0.746,0.889	0.197,0.512,0.148,0.167,0.267,0.056,0.0,0.057,0.228,0.04,0.199,0.598,0.804,0.446,0.689,0.324,0.201,0.494,0.266,0.09,0.821,0.155,0.109,0.055,0.016,0.231,0.484,0.276,0.455,0.618
NM_201144.2497_2527	..............................	........(((..((......))..)))..	0.175,0.109,0.652,0.182,0.273,0.298,0.458,0.101,0.695,0.158,0.194,0.121,0.324,0.36,0.194,0.673,0.553,0.244,0.267,0.395,0.719,0.505,0.586,0.377,0.223,0.358,0.798,0.443,1.0,0.447	0.063,0.154,0.104,0.062,0.0,0.078,0.086,0.009,0.082,0.062,0.064,0.0,0.256,0.163,0.081,0.161,0.026,0.063,0.117,0.251,0.626,0.104,0.308,0.134,0.182,0.057,0.255,0.303,0.792,0.394
NM_201186.2250_2280	....(((...........))).........	(((.((((....))...)))))........	0.62,0.308,0.504,0.25,0.558,0.288,0.289,0.85,0.561,0.572,0.551,0.859,0.62,0.347,0.592,0.551,0.644,0.49,0.084,0.169,0.11,0.124,0.0,0.11,0.036,0.197,0.247,0.249,0.649,0.578	0.148,0.19,0.398,0.173,0.385,0.275,0.195,0.699,0.508,0.518,0.604,0.531,0.366,0.018,0.841,1.0,0.382,0.096,0.092,0.008,0.0,0.127,0.119,0.032,0.067,0.303,0.075,0.061,0.721,0.524
NM_201200.1651_1681	..............................	.((((......))))...............	1.0,1.0,1.0,1.0,1.0,0.651,0.565,1.0,1.0,1.0,1.0,0.485,0.826,0.871,0.859,0.829,0.206,1.0,0.463,0.21,0.543,0.208,0.663,0.696,1.0,0.713,0.666,0.36,0.817,0.822	0.912,0.458,0.638,0.284,1.0,0.097,1.0,1.0,0.806,1.0,1.0,0.263,0.536,0.256,0.303,0.187,0.0,0.499,0.0,0.076,0.0,0.169,0.573,0.431,1.0,0.239,0.156,0.157,0.527,0.785
NM_201215.1150_1180	.(((((....(((....)))....))))).	((((((....(((....)))....))))))	0.406,0.292,0.511,0.194,0.228,0.115,0.149,0.149,0.138,0.517,0.779,0.216,0.822,0.637,0.354,0.387,0.241,0.208,0.499,0.391,0.334,0.203,0.132,0.194,0.29,0.201,0.111,0.083,0.225,0.204	0.205,0.333,0.282,0.132,0.302,0.089,0.033,0.033,0.034,0.275,0.735,0.422,0.456,0.546,0.539,0.274,0.279,0.47,0.181,0.315,0.276,0.218,0.0,0.207,0.189,0.218,0.048,0.018,0.128,0.158
NM_201307.3324_3354	(((((((......))))......)))....	((((.(((((.......)))))))))....	0.222,0.122,0.575,0.438,0.174,0.15,0.164,0.334,0.358,0.235,0.338,0.313,0.297,0.268,0.268,0.239,0.492,0.618,0.718,0.695,0.493,0.01,0.491,0.14,0.034,0.016,0.19,0.248,0.177,0.036	0.1,0.159,0.245,0.16,0.396,0.0,0.038,0.092,0.097,0.093,0.451,0.087,0.163,0.093,0.341,0.122,0.487,0.5,0.457,0.392,0.297,0.0,0.2,0.0,0.0,0.023,0.0,0.0,0.011,0.107
NM_201336.1101_1131	....(((.........)))...........	(((((((.........))).......))))	0.327,0.171,0.484,0.25,0.211,0.218,0.204,0.233,0.339,0.731,0.138,0.391,0.452,0.572,0.52,0.434,0.049,0.197,0.461,0.564,0.347,0.187,0.38,0.629,0.454,0.106,0.54,0.239,0.102,0.333	0.114,0.065,0.165,0.152,0.172,0.037,0.157,0.195,0.225,0.264,0.055,0.403,0.511,0.827,0.247,0.362,0.057,0.046,0.312,0.699,0.107,0.101,0.235,0.702,0.489,0.077,0.391,0.068,0.017,0.148
NM_201474.4103_4133	..............................	..(((..((...))..)))...........	0.387,0.257,1.0,0.293,0.245,0.028,0.185,0.713,0.07,0.548,0.121,0.272,0.136,0.297,0.046,0.403,0.1,0.159,0.7,0.662,0.722,0.634,0.78,0.908,0.665,1.0,0.578,0.651,0.414,0.829	0.125,0.134,0.476,0.09,0.429,0.0,0.106,0.231,0.013,0.128,0.0,0.011,0.006,0.015,0.0,0.033,0.246,0.11,0.259,0.214,0.318,0.502,0.372,0.454,0.637,1.0,0.466,0.598,0.114,0.502
NM_201486.2666_2696	.....((((......))))...........	.....(((((....)))))...........	0.721,0.385,0.477,0.2,0.98,0.298,0.087,0.201,0.768,0.59,0.377,0.837,1.0,0.902,0.642,0.221,0.29,0.41,0.372,0.294,0.115,0.378,0.528,0.267,0.319,0.811,0.597,0.149,0.686,-1	0.564,0.219,0.304,0.068,1.0,0.098,0.112,0.128,0.901,0.276,0.552,0.902,1.0,0.682,0.693,0.146,0.073,0.401,0.416,0.736,0.032,0.111,0.561,0.262,0.245,0.547,0.853,0.004,0.233,0.176
NM_201489.1580_1610	((((...(((......))))))).......	((((...(((....))).))))........	0.426,0.217,0.111,0.025,0.23,0.135,0.116,0.199,0.382,0.288,0.079,0.218,0.384,0.181,0.226,0.067,0.062,0.0,0.095,0.234,0.0,0.051,0.168,0.432,0.854,1.0,0.884,1.0,0.417,0.169	0.314,0.185,0.02,0.0,0.0,0.022,0.111,0.119,0.214,0.202,0.0,0.09,0.285,0.108,0.148,0.041,0.018,0.138,0.205,0.041,0.0,0.084,0.156,0.576,0.621,0.974,0.82,1.0,0.408,0.213
NM_201489.2152_2182	...((....))...................	...((....)).((((.......))))...	0.843,0.764,0.894,0.745,0.169,0.49,0.166,0.64,0.538,0.371,0.395,0.319,0.339,0.569,0.923,0.43,0.498,0.745,0.557,0.144,0.554,0.336,0.714,0.605,0.533,0.436,0.151,0.217,0.137,0.336	0.496,0.7,0.589,0.609,0.403,0.651,0.131,0.203,0.375,0.26,0.246,0.212,0.322,0.221,0.879,0.213,0.401,0.339,0.531,0.096,0.474,0.378,0.659,0.632,0.414,0.16,0.011,0.098,0.025,0.249
NM_201500.1738_1768	.......(((((.......)))))......	.......((((..(((....)))..)))).	0.587,0.445,0.403,0.134,0.239,0.022,0.114,0.368,0.471,0.193,0.158,0.426,0.354,0.233,0.292,0.253,0.601,0.4,0.517,0.422,0.568,0.626,0.0,0.443,0.366,0.881,0.601,0.564,0.571,0.708	0.33,0.39,0.145,0.079,0.116,0.0,0.058,0.097,0.188,0.112,0.105,0.278,0.195,0.164,0.325,0.143,0.477,0.251,0.295,0.298,0.759,0.447,0.117,0.345,0.223,0.696,0.05,0.295,0.31,0.649
NM_201501.1670_1700	..............................	.((.......))(((((........)))))	0.265,0.207,0.977,0.304,0.271,0.142,0.397,0.383,0.238,0.675,0.505,0.649,0.353,0.78,1.0,0.647,0.358,0.365,0.754,0.756,0.531,0.79,0.198,0.685,0.506,0.649,0.677,0.338,0.567,0.394	0.208,0.167,0.298,0.158,0.206,0.018,0.217,0.105,0.27,0.332,0.244,0.169,0.156,0.456,0.607,0.128,0.103,0.209,0.314,0.3,0.627,0.493,0.28,0.326,0.09,0.473,0.31,0.259,0.172,0.184
NM_201501.1966_1996	...((......)).(((((......)))))	((((....(((....)))))))........	0.19,0.237,0.432,0.321,0.563,0.225,0.239,0.306,0.678,0.339,0.35,0.341,0.633,0.679,0.509,0.124,0.407,0.0,0.131,0.147,0.12,0.164,0.11,0.113,0.424,0.285,0.116,0.24,0.186,0.646	0.085,0.016,0.378,0.145,0.476,0.219,0.083,0.335,0.441,0.234,0.333,0.419,0.508,0.357,0.233,0.131,0.252,0.126,0.02,0.008,0.071,0.011,0.009,0.06,0.338,0.154,0.078,0.127,0.19,0.266
NM_205612.623_653	((.((....)))).((((......)).)).	...((....)).((((......))))....	0.628,0.7,1.0,0.327,0.64,0.88,0.06,0.566,0.453,0.108,0.176,0.0,0.166,0.187,0.232,0.07,0.222,0.456,0.174,0.19,0.322,0.911,0.315,0.263,0.414,0.34,0.525,0.327,0.193,0.353	0.278,0.3,0.521,0.055,0.517,0.307,0.128,0.332,0.414,0.075,0.0,0.018,0.13,0.098,0.03,0.0,0.064,0.188,0.099,0.138,0.353,0.477,0.14,0.135,0.063,0.28,0.704,0.168,0.154,0.19
NM_205716.2655_2685	(((((................)).)))...	(((...((.(((.....)))))..)))...	0.48,0.17,0.349,0.202,0.31,0.53,0.343,0.152,0.288,0.273,0.657,0.527,0.278,0.803,0.621,0.395,0.227,0.306,0.395,0.652,0.608,0.604,0.376,0.876,0.575,0.218,0.369,0.485,0.975,0.81	0.188,0.15,0.162,0.09,0.272,0.121,0.33,0.36,0.055,0.067,0.525,0.173,0.046,0.622,0.751,0.174,0.295,0.231,0.153,0.299,0.637,0.275,0.686,0.529,0.49,0.165,0.246,0.865,0.921,0.974
NM_207054.819_849	.((((............)))).........	.((((............))))((.....))	0.112,0.155,0.154,0.0,0.217,0.096,0.375,0.915,0.315,0.636,0.022,0.0,0.169,0.08,0.412,0.886,1.0,0.754,0.194,0.036,0.072,0.056,0.184,0.541,0.725,0.807,0.972,1.0,0.417,0.04	0.101,0.026,0.037,0.0,0.001,0.148,0.323,0.817,0.433,0.467,0.058,0.0,0.019,0.104,0.369,0.724,1.0,0.499,0.047,0.004,0.0,0.0,0.194,0.494,0.904,0.54,0.818,0.993,0.189,0.094
NM_212585.1390_1420	..((((((((......))))...))))...	..((((((((.....))))....))))...	0.168,0.32,0.773,0.259,0.581,0.283,0.137,0.777,0.866,1.0,0.389,0.649,0.693,0.511,0.478,0.512,0.104,0.005,0.261,0.713,0.405,0.484,0.474,0.76,0.231,0.421,0.144,0.372,0.442,0.195	0.083,0.257,0.387,0.082,0.415,0.44,0.244,0.509,0.919,0.739,0.156,0.745,0.528,0.377,0.159,0.303,0.037,0.033,0.142,0.812,0.132,0.277,0.314,0.525,0.103,0.112,0.069,0.802,0.063,0.249
NM_212601.1246_1276	...((....))...................	.......(((.((...........)).)))	0.853,0.571,0.258,0.117,0.054,0.059,0.076,0.078,0.064,0.069,0.0,0.181,0.017,0.07,0.107,0.064,0.054,0.605,1.0,0.952,0.505,0.427,0.178,0.431,1.0,0.995,0.283,0.299,0.48,0.341	1.0,0.678,0.197,0.096,0.078,0.0,0.123,0.073,0.058,0.054,0.0,0.031,0.0,0.0,0.0,0.086,0.109,0.78,1.0,1.0,0.335,0.419,0.502,0.462,0.969,1.0,0.736,0.362,0.309,0.164
NM_212605.1746_1776	..((..((..(((((....))))))).)).	..............(((.......)))...	0.326,0.439,0.316,0.322,0.018,0.056,0.025,0.194,0.497,0.166,0.0,0.161,0.06,0.449,0.095,0.282,0.187,0.512,0.391,0.0,0.001,0.123,0.136,0.38,0.244,0.081,0.041,0.09,0.0,0.001	0.319,0.384,0.269,0.188,0.196,0.102,0.188,0.261,0.381,0.121,0.217,0.641,0.246,0.476,0.113,0.338,0.084,0.526,1.0,0.194,0.245,0.607,0.539,0.708,0.495,0.0,0.014,0.0,0.079,0.112
NM_212621.2100_2130	......((((.(((......)))..)))).	(((............))).(((...)))..	0.048,0.073,-1,-1,-1,0.0,0.191,0.149,0.073,0.199,0.092,0.201,0.044,0.237,0.267,0.045,0.182,0.16,0.0,0.066,0.109,0.021,0.277,0.343,0.956,0.336,0.045,0.14,0.001,0.438	0.0,0.05,0.153,0.205,0.402,0.0,0.07,0.036,0.126,0.69,0.236,0.462,0.34,1.0,0.622,0.235,0.06,0.162,0.143,0.02,0.0,0.083,0.041,1.0,1.0,0.217,0.0,0.0,0.24,0.275
NM_212627.501_531	.....(((((.....)).))).........	(((..(((((.....)).))).))).....	0.25,0.274,0.437,0.18,0.152,0.433,0.085,0.292,0.681,0.351,0.762,0.772,0.762,0.842,0.359,0.474,0.831,0.365,0.237,0.228,0.216,0.414,0.191,0.352,0.419,0.205,0.173,0.206,0.032,0.07	0.0,0.0,0.091,0.093,0.088,0.022,0.0,0.109,0.235,0.044,0.691,0.47,0.611,0.618,0.047,0.065,0.451,0.2,0.154,0.154,0.365,0.426,0.079,0.618,0.217,0.105,0.087,0.133,0.044,0.071
NM_212629.1718_1748	...((...(((........)))...))...	.....((((((........)))..)))...	0.368,0.445,0.566,0.261,0.076,0.603,0.152,0.255,0.239,0.361,0.67,0.643,0.2,0.618,0.767,0.756,0.671,0.392,0.337,0.427,0.065,0.638,0.516,0.527,0.635,0.472,0.696,0.202,0.349,0.446	0.264,0.156,0.215,0.084,0.048,0.0,0.093,0.222,0.0,0.063,0.663,0.613,0.223,0.977,0.28,0.429,0.533,0.175,0.258,0.298,0.267,0.534,0.232,0.438,0.58,0.429,0.473,0.103,0.109,0.861
NM_212636.1247_1277	..............................	.....(((....)))...............	0.49,0.644,0.781,0.318,0.245,0.517,0.192,0.735,0.561,0.554,0.267,0.334,0.73,0.202,1.0,0.428,0.845,0.731,0.863,0.422,0.558,0.38,1.0,0.511,0.177,0.268,0.046,0.24,0.106,0.244	0.389,0.481,0.279,0.08,0.372,0.183,0.073,0.534,0.199,0.381,0.0,0.0,0.457,0.051,0.955,0.088,0.717,0.408,0.212,0.345,0.193,0.265,1.0,0.25,0.165,0.179,0.0,0.068,0.032,0.177
NM_212663.2018_2048	((.((((................)))))).	(((.(((..((........))..)))))).	0.242,0.183,0.291,0.118,0.249,0.23,0.252,0.575,0.276,1.0,0.682,0.336,0.597,0.485,0.635,0.284,0.49,0.439,0.208,0.921,0.587,0.147,0.147,0.05,0.241,0.282,0.274,0.71,0.256,0.46	0.233,0.119,0.08,0.092,0.26,0.105,0.216,0.521,0.149,1.0,0.347,0.193,0.619,0.25,0.472,0.31,0.378,0.175,0.187,0.41,0.172,0.14,0.117,0.064,0.107,0.077,0.305,0.393,0.181,0.68
NM_212663.893_923	...((........))...............	...((((.........))))..........	0.406,0.228,0.544,0.275,0.436,0.113,0.303,0.882,1.0,1.0,0.664,0.584,0.657,0.249,0.441,1.0,0.589,0.332,1.0,1.0,1.0,1.0,0.59,0.681,0.36,0.321,0.318,0.148,0.105,0.391	0.103,0.197,0.309,0.26,0.188,0.029,0.135,0.279,0.884,0.859,0.217,0.486,0.289,0.063,0.136,0.489,0.129,0.116,0.595,0.967,1.0,0.334,0.247,0.213,0.08,0.0,0.295,0.028,0.003,0.024
NM_212771.1090_1120	..............................	..(((..(((...........)))...)))	0.559,1.0,0.651,0.59,0.317,0.303,0.092,0.402,0.518,0.597,0.536,0.41,0.648,0.439,0.414,0.71,0.397,0.383,0.194,0.528,0.491,0.137,0.89,0.445,0.464,0.246,0.183,0.226,0.259,0.44	0.451,0.856,0.234,0.241,0.432,0.078,0.197,0.222,0.244,0.521,0.116,0.244,0.604,0.648,0.101,0.796,0.301,0.123,0.183,0.568,0.155,0.229,0.53,0.432,0.61,0.194,0.088,0.061,0.076,0.243
NM_212857.840_870	.........(((((.....)))))......	........((((((.....)))))).....	0.043,0.0,0.204,0.098,0.077,0.068,0.597,0.567,1.0,0.75,0.306,0.338,0.386,0.169,0.298,0.233,0.119,0.274,0.335,0.522,0.0,0.993,0.47,1.0,0.638,0.281,0.522,0.816,0.908,0.0	0.0,0.022,0.087,0.079,0.009,0.046,0.168,0.339,0.752,0.347,0.18,0.13,0.304,0.037,0.449,0.123,0.02,0.048,0.386,0.313,0.0,0.604,0.378,0.46,0.08,0.232,0.305,0.441,0.292,0.097
NM_212880.1658_1688	...((...........))(((....)))..	..(((.((((........))))..)))...	0.652,0.721,0.715,0.471,0.264,0.621,0.48,0.657,1.0,0.537,0.278,0.439,1.0,1.0,0.51,0.332,0.271,0.243,0.148,0.161,0.279,0.371,0.491,0.61,0.378,0.424,0.572,0.165,0.515,0.427	0.359,0.558,0.505,0.137,0.208,0.363,0.373,0.339,0.625,0.489,0.23,0.288,0.978,1.0,0.167,0.287,0.128,0.076,0.08,0.05,0.078,0.375,0.488,0.496,0.315,0.297,0.399,0.152,0.541,0.214
NM_212947.1828_1858	............(((((....)))))....	..........(((((((....))))).)).	0.362,0.334,0.0,0.034,0.013,0.034,0.08,0.08,0.132,0.156,0.166,0.342,0.067,0.0,0.035,0.106,0.0,0.331,0.012,0.402,0.45,0.417,0.119,0.175,0.014,0.0,0.412,0.255,0.218,0.105	0.2,0.402,0.0,0.0,0.0,0.0,0.0,0.062,0.0,0.029,0.0,0.15,0.0,0.0,0.0,0.0,0.0,0.021,0.024,0.207,0.592,0.635,0.001,0.0,0.019,0.08,0.235,0.209,0.152,0.054
NM_212963.6025_6055	...........(((...(((...)))))).	.(((...))).(((...(((...)))))).	0.68,0.216,0.528,0.318,0.404,0.347,0.187,0.41,0.335,0.9,0.324,0.518,0.319,0.833,0.498,0.145,0.611,0.207,0.518,0.074,0.474,0.407,0.468,0.428,0.098,0.403,0.325,0.057,0.122,0.168	0.404,0.213,0.239,0.063,0.269,0.043,0.0,0.092,0.579,1.0,0.071,0.579,0.306,0.634,0.565,0.1,0.508,0.216,0.393,0.251,0.704,0.203,0.128,0.244,0.077,0.292,0.163,0.054,0.071,0.0
NM_213014.1705_1735	((.((...........))))..........	((.((.((.....)).))))..........	0.481,0.213,0.472,0.307,0.639,0.617,0.367,0.879,1.0,0.753,0.614,1.0,0.578,0.49,0.758,0.909,0.296,0.229,0.234,0.293,0.626,0.684,0.912,1.0,0.524,0.649,0.391,1.0,0.796,1.0	0.044,0.0,0.037,0.033,0.368,0.052,0.001,0.749,0.761,0.209,0.597,0.425,0.086,0.076,0.326,0.335,0.0,0.005,0.0,0.0,0.228,0.385,0.392,1.0,0.257,0.314,0.3,1.0,0.657,1.0
NM_213062.3640_3670	..............................	.(((...((........)).....)))...	0.249,0.335,0.508,0.433,0.845,0.576,0.153,0.496,0.343,0.522,0.295,0.502,0.36,0.368,0.331,0.237,0.682,0.846,0.275,0.19,0.148,0.504,0.352,0.278,0.416,0.298,0.567,0.848,1.0,0.504	0.194,0.317,0.36,0.21,0.632,0.216,0.053,0.231,0.268,0.085,0.101,0.237,0.092,0.329,0.253,0.119,0.304,0.344,0.115,0.099,0.179,0.359,0.016,0.018,0.041,0.165,0.421,0.943,0.822,0.37
NM_213064.1453_1483	.(((((...)))))................	.(((((...))))).(((...)))......	0.218,0.366,0.209,0.052,0.179,0.03,0.111,0.452,0.181,0.182,0.104,0.136,0.095,0.065,0.061,0.133,0.225,0.101,0.051,0.093,0.24,0.202,0.506,0.283,0.37,0.096,0.157,0.138,0.064,0.173	0.226,0.3,0.094,0.021,0.0,0.006,0.074,0.189,0.046,0.057,0.032,0.049,0.07,0.0,0.03,0.0,0.086,0.0,0.052,0.082,0.154,0.15,0.571,0.138,0.356,0.14,0.108,0.102,0.135,0.245
NM_213127.708_738	.((((((.........))))))........	...(((((((.((.....)).)).))))).	0.15,0.106,0.191,0.053,0.138,0.007,0.059,0.159,0.448,0.48,0.267,0.104,0.205,0.106,0.397,1.0,0.326,0.33,0.152,0.187,0.203,0.396,0.468,0.106,0.111,0.116,0.045,0.175,0.027,0.14	0.072,0.36,0.176,0.132,0.161,0.0,0.111,0.457,0.346,0.257,0.292,0.343,0.194,0.182,0.792,0.852,0.016,0.449,0.273,0.829,0.353,0.68,0.885,0.311,0.05,0.0,0.012,0.0,0.17,0.105
NM_213139.1400_1430	...((((.......)))).(((.....)))	..(((((.......)))))(((.....)))	0.363,0.859,0.691,0.141,0.135,0.097,0.063,0.132,0.304,0.444,0.619,0.482,0.157,0.03,0.045,0.164,0.102,0.239,0.23,0.143,0.13,0.087,0.117,0.439,0.665,0.503,0.271,0.037,0.141,0.207	0.602,0.886,0.488,0.147,0.076,0.0,0.0,0.261,0.196,0.296,0.475,0.411,0.067,0.003,0.0,0.079,0.1,0.226,0.129,0.05,0.156,0.176,0.21,0.562,1.0,0.545,0.191,0.03,0.0,0.121
NM_213143.2180_2210	........((....))..............	.(((....((....))........)))...	0.384,0.336,0.924,0.24,0.635,0.657,0.235,0.323,0.328,0.314,0.18,0.391,0.289,0.491,0.482,0.322,0.284,1.0,1.0,1.0,0.665,0.321,0.926,0.177,0.627,0.361,0.833,0.776,0.486,0.166	0.037,0.054,0.41,0.23,0.618,0.339,0.188,0.025,0.058,0.251,0.1,0.034,0.084,0.246,0.101,0.018,0.57,0.323,1.0,0.701,0.232,0.24,0.535,0.076,0.137,0.112,0.379,0.252,0.308,0.0
NM_213157.1027_1057	...(((................))).....	..(((....((..........))...))).	0.381,0.149,0.291,0.236,0.235,0.021,0.311,0.605,1.0,0.507,0.623,0.47,0.097,0.612,0.371,1.0,0.131,1.0,1.0,0.615,0.483,0.227,0.296,0.357,0.03,0.378,0.858,0.091,0.148,0.272	0.356,0.157,0.051,0.0,0.242,0.0,0.33,0.537,0.358,0.36,0.397,0.126,0.181,0.095,0.199,0.87,0.186,0.792,1.0,0.108,0.07,0.176,0.394,0.255,0.035,0.07,0.147,0.238,0.016,0.174
NM_213160.1614_1644	.....((.(((((........))))).)).	...(((..(((((........)))))))).	0.687,1.0,0.553,0.473,0.217,0.235,0.074,0.137,0.054,0.309,0.457,0.217,0.0,0.134,0.0,0.882,0.346,0.333,0.667,0.683,0.462,0.144,0.099,0.187,0.26,0.265,0.556,0.482,0.864,0.548	0.273,0.462,0.15,0.112,0.1,0.017,0.0,0.093,0.06,0.05,0.123,0.059,0.029,0.023,0.114,0.322,0.109,0.211,0.361,0.172,0.137,0.004,0.036,0.156,0.278,0.212,0.3,0.325,0.475,0.407
NM_213216.1183_1213	.........(((.............)))..	......(((.....((...))....)))..	0.101,0.025,0.091,0.102,0.128,0.248,0.071,0.0,0.19,0.049,0.173,0.0,0.242,0.215,0.37,0.282,0.262,0.248,0.477,0.271,0.39,0.413,0.545,0.161,0.409,0.094,0.137,0.129,0.09,0.024	0.058,0.0,0.07,0.051,0.09,0.154,0.024,0.036,0.0,0.032,0.119,0.0,0.078,0.171,0.401,0.066,0.167,0.109,0.731,0.237,0.314,0.316,0.613,0.314,0.433,0.08,0.158,0.105,0.099,0.0
NM_213228.1484_1514	...((...((((....))))))........	...((..(((((....)))))..)).....	0.569,0.401,0.827,0.169,0.37,0.43,0.265,0.519,0.236,0.041,0.133,0.105,0.109,0.256,0.287,0.115,0.0,0.157,0.005,0.277,0.016,0.156,0.334,0.275,0.202,0.662,0.333,0.294,0.181,0.294	0.524,0.427,0.546,0.115,0.318,0.257,0.246,0.222,0.323,0.09,0.131,0.063,0.029,0.146,0.0,0.013,0.128,0.0,0.0,0.072,0.049,0.041,0.183,0.241,0.056,0.412,0.608,0.022,0.222,0.37
NM_213250.2794_2824	..(((((....)).))).............	..(((((....))).)).............	0.349,0.409,0.563,0.029,0.0,0.0,0.043,0.099,0.132,0.243,0.124,0.017,0.005,0.033,0.0,0.0,0.048,0.014,0.393,0.446,0.546,0.39,0.792,0.486,0.582,0.507,0.643,0.294,0.288,0.146	0.231,0.331,0.334,0.019,0.0,0.0,0.016,0.082,0.258,0.162,0.087,0.0,0.0,0.0,0.0,0.0,0.0,0.0,0.354,0.175,0.604,0.532,0.914,0.418,0.638,0.31,0.586,0.166,0.156,0.25
NM_213277.2255_2285	..............................	...........((.(((......))).)).	1.0,0.922,0.835,0.269,0.199,0.125,0.12,0.451,0.448,0.176,0.719,0.46,0.195,0.617,0.107,0.365,0.253,0.483,0.828,0.263,0.234,0.438,0.758,1.0,0.304,0.554,0.328,0.347,0.287,0.207	1.0,1.0,0.646,0.162,0.315,0.033,0.066,0.21,0.264,0.227,0.391,0.06,0.104,0.572,0.243,0.087,0.195,0.487,0.543,0.38,0.259,0.362,0.656,1.0,0.382,0.39,0.234,0.463,0.163,0.083
NM_213290.1462_1492	...((......)).((......))......	...(((....))).((.((...)).))...	0.193,0.211,0.651,0.258,0.67,0.428,0.892,0.721,0.908,0.508,0.589,0.476,0.168,0.494,0.358,0.0,0.798,0.351,0.581,0.525,0.583,0.245,0.01,0.469,0.703,0.56,0.22,0.129,0.173,0.189	0.0,0.115,0.107,0.156,0.769,0.321,0.628,0.545,0.735,0.266,0.356,0.0,0.099,0.38,0.213,0.043,0.399,0.017,0.281,0.139,0.204,0.499,0.055,0.436,0.613,0.0,0.083,0.145,0.0,0.088
NM_213290.2241_2271	......((....))................	...((....)).((........))......	1.0,1.0,0.884,0.233,0.292,0.336,0.219,0.179,0.547,0.22,0.541,0.237,0.819,0.503,0.318,0.654,0.239,0.644,0.084,0.384,0.022,0.062,0.028,0.034,0.006,0.102,0.015,0.083,0.158,0.272	1.0,1.0,0.737,0.14,0.172,0.053,0.0,0.006,0.473,0.087,0.231,0.123,0.365,0.202,0.108,0.442,0.039,0.552,0.026,0.421,0.011,0.035,0.0,0.0,0.0,0.0,0.0,0.018,0.028,0.256
NM_213331.915_945	...((.((..(((...)))..))...))..	........(((....)))............	0.52,0.634,0.833,0.343,0.341,0.004,0.447,0.548,0.57,0.162,0.239,0.268,0.626,0.335,0.321,0.262,0.262,0.353,0.367,1.0,0.596,0.456,0.495,0.914,0.344,0.467,0.209,0.328,0.234,0.0	0.573,0.571,0.371,0.359,0.466,0.097,0.323,0.17,0.395,0.096,0.109,0.205,0.892,0.145,0.091,0.046,0.209,0.2,0.23,1.0,0.448,0.342,0.887,1.0,0.176,0.271,0.136,0.58,0.117,0.173
NM_213354.2642_2672	..((((((..........))))))......	((((((((..........))))))..))..	0.448,0.281,0.276,0.213,0.287,0.036,0.0,0.011,0.321,0.394,0.076,0.479,0.429,0.981,1.0,1.0,1.0,0.903,0.664,0.796,0.43,0.161,0.412,0.524,1.0,0.496,0.245,0.148,0.152,0.188	0.23,0.185,0.249,0.033,0.0,0.0,0.032,0.0,0.171,0.197,0.007,0.202,0.503,1.0,0.869,0.544,1.0,0.759,0.479,0.342,0.132,0.0,0.079,0.444,0.604,0.154,0.059,0.089,0.092,0.0
NM_213355.2544_2574	(((((.....)))))...............	((((((...))))))...............	0.362,0.151,0.078,0.014,0.386,0.263,0.259,0.445,0.387,0.301,0.02,0.058,0.0,0.021,0.197,0.208,0.17,0.118,0.566,1.0,0.625,0.516,0.596,0.828,0.402,0.274,0.604,0.898,1.0,0.774	0.162,0.086,0.0,0.023,0.0,0.095,0.111,0.139,0.3,0.32,0.0,0.0,0.008,0.0,0.178,0.069,0.0,0.13,0.486,1.0,0.425,0.269,0.679,1.0,0.235,0.171,0.362,0.522,1.0,0.747
NM_213358.3349_3379	.........(((((....))))).......	........((((((....))))))......	0.115,0.339,0.566,0.139,0.009,0.0,0.167,0.314,0.576,0.354,0.195,0.438,0.737,0.753,1.0,1.0,0.645,0.468,0.331,0.321,0.174,0.678,0.788,1.0,0.911,0.762,0.912,0.096,0.721,0.352	0.054,0.127,0.28,0.023,0.0,0.0,0.045,0.151,0.203,0.0,0.0,0.075,0.294,0.48,0.419,0.802,0.92,0.099,0.054,0.077,0.128,0.302,0.441,1.0,0.401,0.253,0.387,0.364,0.52,0.178
NM_213379.1799_1829	....(((.....((......)).....)))	....(((.....(((....))).....)))	0.31,0.154,0.466,0.074,0.108,0.272,0.138,0.113,0.431,0.356,0.389,0.263,0.352,0.249,0.878,0.771,0.384,0.655,0.805,0.675,1.0,0.235,0.552,0.843,0.636,0.612,0.799,0.24,0.441,0.364	0.283,0.065,0.131,0.049,0.022,0.088,0.038,0.168,0.423,0.209,0.458,0.274,0.461,0.28,0.87,1.0,0.25,0.784,1.0,0.615,0.719,0.305,0.62,1.0,0.814,0.323,0.594,0.268,0.27,0.228
NM_213424.2020_2050	...((............))...........	((.((............))..)).......	0.124,0.022,0.086,0.124,0.0,0.027,0.117,0.26,0.493,1.0,1.0,1.0,0.856,0.225,0.079,0.263,0.272,0.217,0.451,0.38,0.272,0.291,0.14,0.014,0.194,0.15,0.189,0.1,0.0,0.145	0.0,0.035,0.048,0.084,0.0,0.0,0.0,0.359,0.477,1.0,1.0,1.0,0.781,0.191,0.032,0.189,0.177,0.125,0.377,0.165,0.349,0.144,0.058,0.196,0.0,0.036,0.144,0.052,0.112,0.065
NM_213424.3019_3049	..............((((....))))....	..(((.........((((....))))))).	0.354,0.203,0.265,0.168,0.251,0.074,0.174,0.26,0.56,0.751,0.868,0.446,0.581,0.212,0.053,0.219,0.522,0.62,0.119,1.0,0.454,0.259,0.135,0.148,0.08,0.174,0.235,0.271,0.138,0.078	0.341,0.132,0.168,0.099,0.06,0.0,0.203,0.287,0.491,1.0,0.432,0.189,0.313,0.073,0.088,0.073,0.407,0.192,0.051,0.953,0.412,0.182,0.0,0.0,0.0,0.044,0.107,0.161,0.016,0.0
NM_213446.1843_1873	(((.....(((((....))))).....)))	(((....((((((....))))))....)))	0.193,0.137,0.411,0.222,0.474,0.091,0.21,0.397,0.084,0.208,0.054,0.043,0.272,0.116,0.225,0.191,0.364,0.125,0.157,0.213,0.292,0.345,0.894,0.328,0.882,0.777,0.445,0.387,0.121,0.125	0.258,0.123,0.123,0.113,0.453,0.046,0.105,0.175,0.061,0.073,0.011,0.0,0.082,0.054,0.401,0.207,0.178,0.0,0.068,0.176,0.038,0.179,0.675,0.358,0.796,0.781,0.277,0.128,0.016,0.058
NM_213486.1045_1075	...........((((........))))...	((......)).((((........))))...	0.975,0.471,0.647,0.282,0.782,0.233,0.087,0.0,0.223,0.107,0.535,0.277,0.297,0.395,0.563,0.284,0.383,0.276,0.834,0.4,0.498,1.0,0.112,0.341,0.303,0.484,0.377,0.284,0.641,1.0	0.632,0.387,0.63,0.16,0.367,0.007,0.005,0.048,0.1,0.225,0.359,0.072,0.083,0.254,0.4,0.166,0.161,0.118,0.621,0.038,0.285,0.879,0.065,0.158,0.13,0.31,0.103,0.237,0.624,1.0
NM_213496.1552_1582	....(((((...))))).............	....(((((...)))))(((....)))...	0.265,0.058,0.164,0.011,0.225,0.058,0.299,0.138,0.527,1.0,0.111,0.018,0.098,0.101,0.084,0.151,0.103,0.019,0.262,0.038,0.099,0.096,0.172,0.186,0.021,0.225,0.273,0.0,0.021,0.022	0.21,0.056,0.091,0.097,0.081,0.0,0.668,0.081,1.0,1.0,0.037,0.032,0.016,0.0,0.067,0.051,0.043,0.17,0.024,0.024,0.048,0.178,0.038,0.0,0.151,0.0,0.062,0.07,0.0,0.068
NM_213500.1462_1492	.(((....(((.....)))......)))..	.(((.((((......))))......)))..	0.096,0.113,0.256,0.254,0.114,0.103,0.192,0.507,0.203,0.216,0.672,0.586,0.714,0.543,0.81,0.572,0.667,0.705,0.544,0.868,0.468,0.938,0.257,0.319,0.355,0.242,0.111,0.394,0.293,0.903	0.052,0.001,0.127,0.133,0.304,0.0,0.069,0.227,0.144,0.126,0.691,0.498,0.652,0.571,0.479,0.396,0.42,0.468,0.343,0.709,0.762,0.762,0.056,0.341,0.143,0.047,0.0,0.094,0.182,0.873
NM_213638.780_810	((.((((...........))))..))....	...((........)).(((....)))....	0.891,0.161,0.05,0.019,0.0,0.0,0.0,0.141,0.049,0.524,0.267,0.002,0.126,0.122,0.161,0.076,0.023,0.086,0.093,0.0,0.163,0.3,0.174,0.101,0.089,0.147,0.214,0.47,0.311,0.627	0.809,0.15,0.032,0.027,0.043,0.022,0.124,0.17,0.172,0.848,0.161,0.049,0.169,0.073,0.157,0.117,0.061,0.11,0.051,0.055,0.247,0.467,0.106,0.076,0.038,0.156,0.516,0.409,0.486,0.786
NM_214707.2400_2430	..((((.....))))...............	((((....(((.......)))...))))..	0.368,0.361,0.568,0.14,0.336,0.174,0.287,0.104,0.094,0.333,0.256,0.334,0.234,0.518,0.681,0.332,0.395,0.223,0.286,0.594,0.32,0.552,0.534,0.379,0.538,0.332,0.793,0.245,0.765,0.834	0.193,0.228,0.452,0.15,0.132,0.002,0.0,0.0,0.129,0.39,0.15,0.266,0.229,0.239,0.437,0.221,0.154,0.097,0.158,0.263,0.264,0.614,0.088,0.266,0.406,0.124,0.491,0.101,1.0,0.68
NM_214708.2240_2270	.(((.......)))................	.(((.....)))..................	0.114,0.317,0.189,0.0,0.065,0.083,0.0,0.335,0.041,0.221,0.154,0.0,0.019,0.03,0.448,0.193,0.347,0.2,0.35,0.923,0.631,0.679,0.817,1.0,0.576,0.403,0.541,1.0,0.902,0.809	0.025,0.063,0.0,0.0,0.0,0.0,0.0,0.021,0.0,0.0,0.0,0.039,0.0,0.038,0.338,0.064,0.087,0.253,0.448,0.352,0.551,0.391,0.763,0.771,0.242,0.314,0.902,0.515,0.748,0.79
NM_214712.1560_1590	.....(((...(((......)))....)))	.....(((....((((.....))))..)))	0.545,0.294,0.573,0.168,0.159,0.107,0.142,0.313,0.19,0.215,0.857,0.655,0.647,0.561,1.0,1.0,0.514,0.175,0.48,0.628,0.0,0.32,0.28,0.54,0.305,0.116,0.226,0.693,0.669,0.335	0.459,0.186,0.521,0.274,0.678,0.068,0.105,0.259,0.305,0.115,0.722,0.488,0.312,0.427,1.0,0.768,0.503,0.113,0.299,0.145,0.06,0.161,0.11,0.132,0.0,0.125,0.065,0.197,0.278,0.146
NM_214780.672_702	...(((((....)).)))............	...(((((....))).))............	0.666,0.484,0.699,0.165,0.023,0.051,0.236,0.018,0.41,0.318,0.67,0.158,0.186,0.241,0.332,0.445,0.234,0.157,0.338,0.22,0.308,0.256,0.59,0.254,0.195,0.229,0.626,0.399,0.447,0.597	0.164,0.193,0.335,0.115,0.059,0.0,0.092,0.049,0.0,0.138,0.239,0.137,0.016,0.023,0.064,0.228,0.016,0.145,0.003,0.06,0.04,0.454,0.25,0.107,0.029,0.0,0.632,0.262,0.21,0.56

## Sheet: cell4_cell64
transcript.start_end	dot(cell4)	dot(cell64)	shape(cell4)	shape(cell64)
NM_001001840.3260_3290	.....((((((((.......))).).))))	...(((.((((((.......))).))))))	0.787,0.834,0.097,0.136,0.188,0.0,0.0,0.032,0.059,0.0,0.0,0.131,0.238,0.632,0.107,0.027,0.146,0.367,0.866,1.0,0.16,0.277,0.128,0.269,0.378,0.759,0.09,0.45,0.35,0.434	0.784,0.349,0.219,0.0,0.085,0.0,0.0,0.0,0.0,0.0,0.0,0.097,0.056,0.483,0.0,0.0,0.17,0.141,0.726,1.0,0.11,0.284,0.0,0.398,0.226,0.498,0.122,0.292,0.277,0.212
NM_001001943.3092_3122	((.(((((.......)))))..))......	((.((((.((....))))))..))......	0.433,1.0,0.193,0.158,0.0,0.007,0.093,0.407,0.385,0.209,1.0,0.567,0.256,0.132,0.119,0.072,0.019,0.043,0.073,0.0,0.084,0.27,0.013,0.185,0.125,0.512,1.0,0.29,0.326,0.0	0.614,1.0,0.081,0.12,0.019,0.0,0.0,0.355,0.107,0.089,1.0,0.775,0.052,0.079,0.104,0.039,0.041,0.091,0.0,0.0,0.045,0.291,0.057,0.119,0.071,0.312,1.0,0.122,0.334,0.04
NM_001002323.919_949	...................(((....))).	...((.(((((..((....)).))))))).	0.119,0.27,0.333,0.059,0.527,0.01,0.607,0.702,0.857,0.548,1.0,0.971,1.0,0.596,0.282,0.39,0.482,0.74,0.683,0.081,0.0,0.111,0.444,0.136,0.115,0.161,0.172,0.393,0.055,0.666	0.036,0.361,0.249,0.058,0.685,0.0,0.463,0.797,0.82,0.091,0.777,0.719,1.0,0.384,0.147,0.262,0.344,0.478,0.337,0.138,0.0,0.125,0.091,0.28,0.076,0.015,0.22,0.28,0.035,0.696
NM_001002364.945_975	....((((......))))............	.((.((((......))))..))........	0.15,0.249,0.267,0.0,0.507,0.083,0.138,0.0,0.3,0.265,0.256,0.158,0.096,0.236,0.205,0.1,0.631,0.342,0.903,0.483,0.551,0.36,0.232,0.595,0.212,0.0,0.118,0.626,0.348,0.318	0.058,0.076,0.063,0.028,0.514,0.108,0.032,0.03,0.068,0.346,0.017,0.048,0.084,0.116,0.037,0.005,0.321,0.37,1.0,0.339,0.091,0.297,0.105,0.781,0.118,0.0,0.152,0.606,0.29,0.36
NM_001002539.767_797	...........(((........))).....	...........((((......)))).....	0.742,0.572,0.365,0.126,0.163,0.087,0.157,0.445,0.281,0.014,0.107,0.0,0.0,0.136,0.205,0.012,0.052,0.187,0.47,0.0,0.439,0.415,0.459,0.129,0.339,0.073,0.057,0.033,0.041,0.062	0.501,0.233,0.069,0.069,0.407,0.0,0.0,0.379,0.0,0.062,0.023,0.0,0.0,0.113,0.0,0.0,0.069,0.285,0.056,0.029,0.455,0.24,0.112,0.157,0.463,0.0,0.131,0.188,0.0,0.127
NM_001002572.942_972	................((((...))))...	.....((((...(((...)))....)))).	0.011,0.0,0.003,0.005,0.246,0.024,0.094,0.058,0.111,0.213,0.421,0.625,0.106,0.087,0.439,0.35,0.096,0.041,0.102,0.225,0.898,0.867,0.242,0.183,0.443,0.132,0.28,0.91,1.0,1.0	0.0,0.0,0.02,0.012,0.193,0.042,0.101,0.005,0.107,0.213,0.382,0.667,0.056,0.085,0.349,0.447,0.063,0.007,0.079,0.163,1.0,1.0,0.164,0.125,0.252,0.134,0.134,0.587,1.0,1.0
NM_001002651.2882_2912	.........(((.........)))......	(((....))).(((......))).......	0.161,0.0,0.397,0.143,0.253,0.404,0.516,0.496,0.156,0.181,0.018,0.0,0.564,0.087,0.0,0.079,0.153,0.0,0.532,0.497,0.58,0.59,0.0,0.413,0.737,0.202,0.085,1.0,1.0,1.0	0.066,0.0,0.093,0.031,0.364,0.026,0.303,0.032,0.051,0.127,0.0,0.025,0.283,0.047,0.069,0.044,0.177,0.1,0.23,0.716,0.203,0.135,0.0,0.287,0.261,0.327,0.262,1.0,1.0,1.0
NM_001002655.2097_2127	...((((((((.....))).))....))).	.(((.((((((.....))).))).)))...	0.387,0.362,0.338,0.144,0.218,0.0,0.313,0.047,0.011,0.0,0.098,0.053,0.508,0.12,0.012,0.066,0.134,0.0,0.071,0.026,0.151,0.262,0.898,0.216,0.339,0.162,0.189,0.06,0.072,0.711	0.246,0.299,0.129,0.163,0.218,0.009,0.095,0.028,0.009,0.025,0.11,0.086,0.314,0.068,0.0,0.04,0.049,0.0,0.21,0.113,0.144,0.235,0.881,0.31,0.133,0.015,0.056,0.046,0.008,0.615
NM_001003425.1876_1906	..(((.......))).((......))....	(((.....))).((((......))))....	0.148,0.131,0.277,0.168,0.457,0.008,0.572,0.968,1.0,0.881,0.819,0.684,0.06,0.195,0.348,1.0,0.251,0.287,0.147,0.0,0.315,0.414,0.302,0.58,0.303,0.115,0.13,0.491,0.463,0.045	0.213,0.041,0.039,0.152,0.686,0.004,0.582,0.283,0.394,0.72,0.461,0.318,0.033,0.133,0.353,1.0,0.134,0.261,0.187,0.0,0.358,0.32,0.227,0.417,0.359,0.172,0.091,0.601,0.146,0.059
NM_001003623.1861_1891	((((((...))))))...............	.(((((...))))).(((........))).	0.413,0.615,0.641,0.138,0.298,0.345,0.238,0.105,0.302,0.33,0.231,0.317,0.351,0.229,0.59,0.25,0.365,0.192,0.553,0.351,0.72,0.735,0.877,0.387,0.984,0.422,1.0,0.347,1.0,0.555	0.259,0.482,0.595,0.248,0.308,0.183,0.114,0.007,0.159,0.404,0.275,0.362,0.125,0.191,0.658,0.166,0.216,0.091,0.216,0.329,0.896,0.45,0.658,0.062,1.0,0.077,1.0,0.296,0.851,0.217
NM_001003835.4064_4094	..............................	...((..................)).....	0.685,0.713,0.519,0.0,0.557,0.0,0.118,0.418,0.443,0.495,0.821,1.0,0.911,0.558,1.0,0.456,0.149,0.08,0.479,0.832,1.0,0.0,0.144,0.472,0.143,0.424,0.448,0.978,0.065,0.663	0.412,0.228,0.389,0.0,0.398,0.03,0.275,0.278,0.15,0.045,0.72,0.42,0.237,0.684,1.0,0.237,0.057,0.0,0.213,0.717,0.928,0.16,0.0,0.248,0.0,0.113,0.534,0.549,0.071,0.091
NM_001003879.1161_1191	...............(((.((...)).)))	...((((((......(((...)))))))))	0.731,0.209,0.287,0.107,1.0,0.201,1.0,1.0,1.0,1.0,1.0,1.0,0.905,0.601,0.448,0.058,0.073,0.177,0.476,0.223,0.025,0.166,0.021,0.045,0.156,0.135,0.319,0.177,0.084,0.277	0.439,0.118,0.193,0.117,1.0,0.051,0.856,0.475,1.0,1.0,1.0,1.0,0.432,0.915,0.345,0.014,0.157,0.109,0.72,0.207,0.062,0.139,0.049,0.054,0.066,0.198,0.21,0.185,0.225,0.295
NM_001003880.3437_3467	..........((((............))))	.....((((...((((...)))).))))..	0.701,0.566,0.311,0.169,0.213,0.0,0.152,0.657,0.242,0.238,0.348,0.564,0.147,0.237,0.222,0.501,0.922,0.218,1.0,0.476,1.0,0.753,0.307,0.189,0.465,0.185,0.275,0.571,0.174,0.078	0.681,0.586,0.358,0.134,0.459,0.0,0.12,0.605,0.096,0.106,0.24,0.711,0.171,0.184,0.101,0.343,0.596,0.073,1.0,0.412,0.91,0.584,0.132,0.12,0.202,0.307,0.176,0.707,0.119,0.139
NM_001004001.1900_1930	...((((....)).))..............	...((((....).)))..............	0.491,0.786,0.243,0.256,0.346,0.0,0.19,0.152,0.364,0.226,0.472,0.098,0.374,0.263,0.189,0.183,0.109,0.166,0.682,0.168,0.398,0.441,0.496,0.797,0.53,0.246,0.329,0.524,0.224,0.39	0.428,0.457,0.326,0.044,0.097,0.003,0.054,0.098,0.114,0.041,0.144,0.224,0.129,0.008,0.124,0.304,0.016,0.185,0.303,0.188,0.218,0.269,0.51,0.666,0.337,0.31,0.07,0.377,0.161,0.152
NM_001004295.1560_1590	..((((((........))).))).......	..((((((........)))).)).......	1.0,1.0,1.0,0.642,0.01,0.024,0.093,0.118,0.031,0.092,0.53,0.121,0.851,0.657,0.524,0.997,0.843,0.0,0.253,0.196,0.0,0.09,0.169,0.946,0.299,0.441,0.198,0.158,0.142,0.117	1.0,1.0,1.0,0.608,0.19,0.094,0.052,0.116,0.0,0.171,0.205,0.047,0.894,0.843,0.373,0.486,0.726,0.01,0.0,0.018,0.001,0.179,0.618,1.0,0.452,0.42,0.068,0.161,0.0,0.079
NM_001004557.2304_2334	...((.((((....(((...))))))).))	((((((...(((...))).))).)))....	0.751,0.454,0.089,0.262,0.123,0.0,0.142,0.0,0.0,0.121,0.035,0.337,0.046,0.129,0.0,0.108,0.133,0.037,0.0,0.01,0.026,0.132,0.347,0.154,0.476,0.424,0.307,0.797,0.012,0.495	0.532,0.13,0.124,0.108,0.0,0.0,0.129,0.399,0.223,0.243,0.0,0.065,0.056,0.088,0.023,0.045,0.427,0.0,0.0,0.0,0.0,0.119,0.696,0.0,0.133,0.122,0.147,0.234,0.0,0.216
NM_001004579.2290_2320	...((((....))))...............	...((((....))))(((.........)))	0.583,0.705,0.512,0.086,0.0,0.0,0.05,0.099,0.36,0.357,0.386,0.019,0.0,0.247,0.144,0.405,0.338,0.294,0.387,0.686,0.112,0.109,0.163,0.078,0.442,0.491,0.36,0.161,0.292,0.236	0.363,0.203,0.298,0.082,0.02,0.0,0.0,0.0,0.065,0.3,0.046,0.047,0.024,0.269,0.131,0.385,0.211,0.155,0.314,1.0,0.299,0.0,0.272,0.318,0.563,0.289,0.346,0.016,0.197,0.145
NM_001005982.1222_1252	......(((((.(..........)))))).	((((....))))......((((....))))	0.332,0.379,0.796,1.0,1.0,0.14,0.164,0.0,0.0,0.034,0.174,0.196,0.352,0.711,0.863,0.594,0.233,0.303,0.166,0.813,0.521,0.498,0.918,1.0,1.0,1.0,0.101,0.0,0.0,0.319	0.053,0.007,0.0,0.482,0.777,0.092,0.01,0.0,0.0,0.0,0.101,0.0,0.162,0.37,0.696,0.398,0.0,0.153,0.047,0.268,0.0,0.166,0.341,0.488,0.455,0.46,0.0,0.049,0.0,0.0
NM_001006019.1167_1197	......(((.((((((....)))))).)))	...(((..(((((((...))))))))))..	0.173,0.042,0.169,0.2,0.033,0.278,0.061,0.086,0.215,0.386,0.105,0.106,0.07,0.047,0.156,0.953,1.0,1.0,0.674,0.106,0.098,0.16,0.0,0.0,0.0,0.208,0.221,0.034,0.0,0.0	0.128,0.0,0.0,0.044,0.066,0.0,0.071,0.026,0.111,0.253,0.02,0.025,0.045,0.014,0.081,0.913,1.0,0.459,0.501,0.0,0.037,0.083,0.0,0.0,0.0,0.08,0.087,0.0,0.0,0.0
NM_001006043.1190_1220	.........(((..(((....)))..))).	(((......)))...((((....))))...	0.112,0.348,0.623,0.339,0.538,0.575,0.568,0.684,1.0,1.0,0.389,0.14,0.353,0.148,0.274,0.177,0.172,0.283,0.553,0.457,1.0,0.406,0.086,0.215,0.407,0.221,0.104,0.097,0.3,0.126	0.157,0.317,0.548,0.268,0.523,0.351,0.547,0.629,0.943,0.818,0.134,0.113,0.447,0.165,0.325,0.248,0.314,0.244,0.471,0.532,1.0,0.371,0.039,0.134,0.647,0.028,0.0,0.122,0.305,0.202
NM_001006085.1017_1047	((((..((((....))))..))))......	((((..((((....))))..)).)).....	0.088,0.355,0.366,0.111,0.175,0.001,0.087,0.356,0.471,0.314,0.39,0.368,0.224,0.15,0.0,0.0,0.0,0.207,0.326,0.037,0.067,0.086,0.165,0.072,0.228,0.314,0.248,0.099,0.117,0.0	0.09,0.145,0.664,0.007,0.18,0.119,0.258,0.17,0.652,0.256,0.763,0.174,0.03,0.03,0.072,0.03,0.0,0.075,0.141,0.0,0.01,0.324,0.213,0.122,0.163,0.407,0.257,0.129,0.059,0.105
NM_001007334.1217_1247	((((.((...)))))).((.......))..	((((((...)).)))).((.......))..	0.245,0.287,1.0,0.074,0.086,0.064,0.062,0.56,0.334,0.977,0.034,0.0,0.0,0.034,0.119,0.428,0.095,0.086,0.07,0.0,0.044,0.042,0.0,0.0,0.0,0.117,0.161,0.0,0.0,0.0	0.128,0.115,0.614,0.0,0.016,0.0,0.044,0.498,0.261,0.221,0.0,0.0,0.0,0.0,0.0,0.188,0.082,0.0,0.0,0.0,0.0,0.069,0.0,0.135,0.052,0.087,0.212,0.0,0.161,0.0
NM_001007346.1534_1564	...((....................))...	(((....................)))....	0.222,0.309,0.33,0.0,0.207,0.0,0.369,0.215,0.342,1.0,1.0,0.266,0.478,0.148,0.356,0.278,1.0,0.16,0.303,0.13,0.292,0.742,0.614,0.059,0.117,0.078,0.009,0.007,0.071,0.488	0.156,0.114,0.269,0.094,0.107,0.0,0.315,0.174,0.215,0.778,1.0,0.25,0.272,0.117,0.124,0.161,1.0,0.252,0.217,0.0,0.106,0.716,0.809,0.018,0.049,0.0,0.03,0.0,0.17,0.418
NM_001007410.2415_2445	.............(((...)))........	.........((..(((...)))...))...	0.913,1.0,1.0,1.0,1.0,0.293,1.0,1.0,1.0,0.689,0.085,0.398,0.032,0.0,0.038,0.0,0.0,0.046,0.046,0.0,0.0,0.007,0.0,0.0,0.086,0.0,0.0,0.0,0.012,0.0	0.825,0.866,1.0,0.414,1.0,0.235,1.0,1.0,1.0,0.24,0.0,0.551,0.049,0.008,0.016,0.041,0.0,0.0,0.0,0.0,0.025,0.0,0.0,0.0,0.0,0.104,0.009,0.0,0.0,0.0
NM_001008575.1997_2027	..............................	........((((..........))))....	0.207,0.347,0.189,0.039,0.188,0.166,0.21,0.488,0.315,0.207,0.155,0.572,0.206,0.273,0.511,0.0,0.296,0.134,0.391,0.583,0.021,0.002,0.081,0.683,0.618,0.728,0.426,0.438,0.195,0.011	0.0,0.054,0.145,0.11,0.268,0.027,0.298,0.238,0.32,0.211,0.051,0.677,0.042,0.151,0.435,0.035,0.246,0.148,0.316,0.836,0.1,0.0,0.116,0.73,0.332,0.729,0.723,0.378,0.272,0.0
NM_001008621.1660_1690	(((((.............))))).......	(((((((.....))....))))).......	0.0,0.078,0.0,0.114,0.387,0.147,0.277,1.0,1.0,1.0,1.0,0.855,0.343,1.0,1.0,0.267,0.0,0.073,0.134,0.0,0.044,0.04,0.071,0.212,1.0,0.104,0.0,0.253,0.311,1.0	0.0,0.0,0.0,0.0,0.438,0.003,0.126,1.0,1.0,0.95,0.838,0.694,0.165,1.0,1.0,0.035,0.104,0.0,0.0,0.037,0.018,0.075,0.033,0.169,1.0,0.0,0.0,0.149,0.439,0.637
NM_001008644.2815_2845	...(((((.....((.....)).)))))..	...(((((..((.......))..)))))..	0.237,0.135,0.231,0.051,0.122,0.0,0.0,0.288,0.14,0.501,1.0,0.997,0.586,0.103,0.251,0.485,0.016,0.606,0.307,0.144,0.0,0.0,0.017,0.0,0.012,0.013,0.018,0.057,0.052,0.009	0.215,0.143,0.039,0.105,0.087,0.0,0.0,0.235,0.0,0.343,1.0,0.557,0.312,0.122,0.101,0.394,0.02,0.46,0.107,0.033,0.0,0.0,0.027,0.0,0.0,0.0,0.0,0.0,0.123,0.001
NM_001009914.1655_1685	..(((..........))).(((.....)))	...........(((((....))))).....	0.543,0.9,0.568,0.387,0.759,0.017,0.814,1.0,1.0,0.417,0.402,1.0,0.508,0.273,0.365,0.255,0.0,0.0,0.009,0.0,0.0,0.058,0.358,0.281,0.0,0.197,0.0,0.108,0.75,0.084	0.162,0.547,0.189,0.0,0.491,0.097,0.258,0.682,1.0,0.015,0.098,0.175,0.461,0.0,0.022,0.005,0.0,0.056,0.0,0.0,0.0,0.0,0.377,0.089,0.093,0.0,0.0,0.076,0.462,0.132
NM_001012247.14466_14496	.((((((.((......)).)))..)))...	...((.(((....))))).((.......))	-1,-1,-1,0.124,0.191,1.0,0.069,0.052,0.199,0.353,0.478,1.0,1.0,0.172,0.036,0.072,0.147,0.0,0.126,0.053,0.089,0.276,0.0,0.0,0.052,0.026,0.0,0.0,0.0,0.335	0.123,0.139,1.0,0.173,0.039,1.0,0.005,0.093,0.062,0.046,0.235,1.0,0.711,0.038,0.0,0.0,0.0,0.0,0.041,0.0,0.0,0.001,0.0,0.048,0.0,0.03,0.0,0.0,0.0,0.02
NM_001012490.1893_1923	......((((..............))))..	.(((((...)))))((((......))))..	0.772,0.381,0.86,0.117,0.555,0.139,0.0,0.16,0.181,0.061,0.478,0.787,0.883,0.778,0.459,0.228,0.661,1.0,0.329,0.879,0.59,0.229,0.302,0.328,0.101,0.0,0.0,0.06,0.067,0.569	0.411,0.133,0.269,0.025,0.218,0.069,0.127,0.073,0.056,0.091,0.482,0.457,0.766,0.338,0.0,0.275,0.241,1.0,0.287,0.778,0.37,0.118,0.17,0.33,0.096,0.002,0.0,0.0,0.091,0.28
NM_001013545.868_898	....(((........))).(((....))).	.((.(((........))).)).........	0.899,0.262,0.248,0.049,0.03,0.023,0.117,0.107,0.285,0.485,0.151,0.381,0.225,0.024,0.035,0.039,0.108,0.225,0.134,0.069,0.005,0.015,0.03,0.063,0.023,0.226,0.201,0.368,0.529,0.224	0.753,0.006,0.154,0.02,0.0,0.0,0.157,0.251,0.392,0.651,0.154,0.451,0.194,0.098,0.142,0.044,0.111,0.281,0.228,0.043,0.104,0.0,0.128,0.028,0.043,0.194,0.306,0.692,0.649,0.065
NM_001014322.1909_1939	...((.((.......))))...........	...((.....))..((((........))))	0.177,0.039,0.115,0.048,0.0,0.0,0.098,0.344,0.504,0.449,0.046,0.497,0.77,1.0,0.929,0.179,0.651,0.168,0.315,0.353,0.559,0.179,0.87,0.273,1.0,0.197,0.163,0.269,0.544,1.0	0.142,0.0,0.154,0.063,0.0,0.0,0.077,0.179,0.113,0.265,0.0,0.08,0.484,1.0,0.321,0.085,0.696,0.035,0.289,0.435,0.075,0.207,0.487,0.218,0.708,0.214,0.091,0.055,0.308,1.0
NM_001017618.1082_1112	.(((.(((((...........))))).)))	(((((.((((...))))....)))))....	0.182,0.0,0.25,0.067,0.218,0.0,0.0,0.112,0.3,0.824,0.54,0.879,0.862,0.343,0.547,0.238,0.443,0.074,0.0,0.0,0.415,0.056,0.0,0.051,0.11,0.662,0.0,0.274,0.159,0.0	0.027,0.0,0.0,0.0,0.05,0.0,0.015,0.074,0.078,0.467,0.362,0.51,1.0,0.198,0.004,0.199,0.214,0.0,0.0,0.062,0.094,0.027,0.0,0.021,0.071,0.352,0.0,0.0,0.062,0.03
NM_001017759.980_1010	..............................	......(((...........))).......	0.0,0.0,0.112,0.044,0.222,0.159,0.131,0.414,0.193,0.35,0.476,1.0,0.0,0.047,0.696,0.241,0.082,0.357,0.0,0.184,0.075,0.142,0.067,0.444,0.239,1.0,0.737,0.528,0.046,0.917	0.0,0.033,0.0,0.0,0.061,0.0,0.146,0.125,0.135,0.353,0.293,0.951,0.0,0.03,0.626,0.087,0.015,0.324,0.0,0.263,0.188,0.036,0.173,0.495,0.241,0.886,0.456,0.235,0.144,0.722
NM_001017801.826_856	.((((((...............))))))..	.((((((....((....))...))))))..	0.975,0.472,0.496,0.146,0.39,0.028,0.0,0.264,0.103,0.407,0.538,0.356,0.46,0.618,0.296,0.311,0.358,0.219,0.961,0.68,0.619,0.509,0.137,0.161,0.072,0.045,0.217,0.764,0.405,0.536	0.668,0.482,0.411,0.118,0.294,0.004,0.0,0.235,0.043,0.119,0.209,0.08,0.548,0.807,0.137,0.209,0.044,0.195,0.853,0.485,0.369,0.271,0.08,0.16,0.066,0.0,0.13,0.722,0.13,0.365
NM_001017812.874_904	...(((((.........)))))........	...(((((.((....)))))))........	0.529,0.497,0.426,0.211,0.441,0.162,0.07,0.188,0.724,0.323,0.213,0.585,0.251,0.252,0.912,0.354,0.314,0.134,0.054,0.054,0.0,0.022,0.074,0.01,0.035,0.163,0.016,0.005,0.124,0.238	0.506,0.267,0.365,0.119,0.446,0.116,0.035,0.076,0.666,0.384,0.232,0.624,0.147,0.195,0.882,0.369,0.076,0.149,0.038,0.0,0.021,0.034,0.048,0.0,0.0,0.116,0.0,0.006,0.113,0.154
NM_001018135.3280_3310	.((((..((.....))...)))).......	.((((..((.......)).)))).......	0.615,0.522,0.53,0.118,0.443,0.226,0.326,0.231,0.001,0.0,0.449,0.301,0.225,0.072,0.013,0.0,0.0,0.066,0.256,0.0,0.04,0.0,0.074,0.075,0.0,0.082,0.0,0.0,0.425,0.412	0.353,0.334,0.146,0.038,0.453,0.191,0.115,0.133,0.028,0.104,0.768,0.345,0.279,0.021,0.067,0.0,0.0,0.106,0.134,0.0,0.091,0.024,0.029,0.0,0.218,0.0,0.052,0.082,0.264,0.44
NM_001020526.850_880	.(((...((((....))))..)))......	((....)).((.((((.....)))).))..	0.118,0.252,0.468,0.0,0.099,0.122,0.029,-1,-1,-1,-1,-1,-1,-1,-1,-1,-1,-1,-1,-1,-1,-1,-1,-1,-1,-1,-1,-1,-1,-1	0.339,0.148,0.148,0.066,0.053,0.0,0.235,0.098,0.414,0.0,1.0,0.12,0.0,0.0,0.126,0.09,0.0,0.501,0.214,0.342,0.0,0.0,-1,-1,-1,-1,-1,-1,-1,-1
NM_001020595.2151_2181	.((((((((((........)))).))))))	.((((((((((........))).)))))))	1.0,0.704,0.547,0.257,0.486,0.12,0.185,0.38,0.058,0.29,0.647,0.209,0.0,0.308,0.083,0.321,0.0,0.028,0.223,0.074,0.171,0.096,0.081,0.127,0.0,0.115,0.225,0.093,0.237,0.161	0.831,0.496,0.33,0.065,0.388,0.065,0.0,0.229,0.002,0.134,0.295,0.0,0.05,0.299,0.157,0.403,0.0,0.0,0.007,0.0,0.127,0.1,0.0,0.041,0.023,0.127,0.007,0.146,0.026,0.071
NM_001020700.2821_2851	.((((.......)))).((...))......	........(((((((......))).)))).	-1,-1,-1,0.231,0.512,0.201,1.0,0.7,0.686,0.865,0.77,0.646,0.186,0.23,0.627,0.38,0.18,0.058,0.176,0.231,0.055,0.229,0.029,0.0,0.028,0.0,0.029,0.158,0.217,0.0	0.195,0.351,0.61,0.0,0.437,0.1,0.879,0.485,0.335,0.589,0.292,0.045,0.149,0.158,0.426,0.235,0.037,0.063,0.0,0.045,0.0,0.051,0.0,0.051,0.0,0.0,0.082,0.123,0.126,0.009
NM_001020781.2873_2903	((.((((..(((.......)))))))))..	(((.(((..(((.......)))))))))..	0.976,0.419,0.637,0.346,0.485,0.113,-1,-1,-1,-1,-1,-1,-1,-1,-1,-1,-1,-1,-1,-1,-1,-1,-1,-1,-1,-1,-1,-1,-1,-1	0.697,0.233,0.32,0.107,0.518,0.06,-1,-1,-1,-1,-1,-1,-1,-1,-1,-1,-1,-1,-1,-1,-1,-1,-1,-1,-1,-1,-1,-1,-1,-1
NM_001025503.1277_1307	................(((......)))..	(((..((..........))..)))......	0.252,0.54,0.473,0.235,0.208,0.096,0.138,0.2,0.679,0.301,0.147,0.14,0.753,0.182,0.044,0.02,0.276,0.242,0.135,0.33,0.23,0.427,0.57,0.28,0.635,0.097,0.151,0.036,0.239,0.459	0.078,0.294,0.319,0.085,0.296,0.084,0.239,0.206,0.649,0.133,0.095,0.096,0.647,0.07,0.021,0.014,0.234,0.239,0.172,0.469,0.199,0.261,0.197,0.423,0.933,0.112,0.169,0.061,0.139,0.65
NM_001030129.1453_1483	((.((........)).)).((.....))..	.(((...(((........))).....))).	0.624,0.502,0.528,0.16,0.368,0.173,0.114,0.146,0.54,0.109,0.336,0.133,0.033,0.0,0.0,0.0,0.071,0.34,0.162,0.165,0.313,0.782,0.504,0.578,0.071,0.0,0.196,0.0,0.33,0.035	0.198,0.274,0.211,0.263,0.412,0.058,0.0,0.173,0.405,0.113,0.252,0.243,0.0,0.111,0.004,0.0,0.042,0.549,0.178,0.307,0.259,0.756,0.611,0.478,0.0,0.0,0.259,0.0,0.264,0.042
NM_001030203.2515_2545	...(((........))).((......))..	...((...(((((.((...))..)))))))	0.294,0.118,0.232,0.03,0.279,0.09,0.235,0.464,0.219,0.329,0.5,0.937,1.0,0.614,0.708,0.153,0.397,0.497,0.107,0.356,0.582,0.22,0.165,0.359,0.349,0.095,0.0,0.0,0.14,0.044	0.217,0.124,0.217,0.063,0.425,0.0,0.068,0.144,0.315,0.0,0.16,1.0,0.852,0.293,0.54,0.076,0.449,0.078,0.0,0.302,0.29,0.068,0.208,0.041,0.157,0.035,0.0,0.0,0.0,0.052
NM_001030227.2101_2131	...(((..((....)))))...........	.(((((..((....)))))...))......	0.317,0.093,0.0,0.0,0.0,0.0,0.163,0.467,0.398,0.448,1.0,1.0,0.719,0.064,0.078,0.106,0.124,0.0,0.0,0.21,0.282,0.366,0.302,0.261,0.321,0.223,0.433,1.0,1.0,1.0	0.113,0.0,0.018,0.0,0.069,0.0,0.068,0.019,0.048,0.252,1.0,0.759,0.575,0.0,0.088,0.0,0.11,0.0,0.0,0.044,0.292,0.203,0.11,0.099,0.201,0.214,0.335,1.0,0.92,0.644
NM_001030247.1236_1266	...((....)).(((......)))......	..(((....)))(((......)))......	0.284,0.866,0.389,0.739,0.658,0.303,1.0,0.85,0.619,0.0,0.033,0.011,0.0,0.0,0.009,0.009,0.04,0.056,0.363,0.176,0.086,0.147,0.13,0.052,0.165,0.566,0.575,0.455,0.176,0.0	0.088,0.528,0.24,0.431,0.855,0.139,1.0,0.64,0.27,0.0,0.021,0.06,0.0,0.0,0.0,0.0,0.04,0.0,0.283,0.174,0.039,0.068,0.243,0.008,0.053,0.406,0.69,0.187,0.097,0.0
NM_001033746.878_908	.....((.((.(((((....))))).))))	.....(((.(.(((((....))))).))))	0.404,0.314,0.281,0.073,0.319,0.013,0.083,0.2,0.215,0.033,0.18,0.315,0.558,0.054,0.068,0.255,0.777,0.158,0.24,0.14,0.048,0.236,0.281,0.072,0.153,0.194,0.167,0.475,0.58,0.15	0.252,0.112,0.294,0.048,0.311,0.001,0.096,0.175,0.11,0.105,0.247,0.279,0.438,0.082,0.186,0.249,0.677,0.188,0.195,0.12,0.0,0.202,0.164,0.073,0.074,0.196,0.143,0.375,0.467,0.13
NM_001034183.2049_2079	...((((.(((..........)))))))..	......((((((((.......)))))))).	0.097,0.115,0.143,0.0,0.311,0.0,0.451,0.256,0.627,0.002,0.047,0.196,1.0,0.539,0.295,0.013,0.0,0.076,0.23,0.137,0.158,0.002,0.0,0.056,0.0,0.092,0.484,0.26,0.108,0.407	0.061,0.125,0.109,0.109,0.296,0.011,0.281,0.112,0.383,0.012,0.164,0.16,0.487,0.032,0.257,0.123,0.086,0.275,0.585,0.055,0.094,0.005,0.0,0.114,0.0,0.067,0.311,0.148,0.18,0.239
NM_001037424.828_858	(((((...))))).((......))......	(((((...))))).................	0.287,0.112,0.102,0.007,0.12,0.08,0.079,0.124,0.043,0.033,0.022,0.005,0.011,0.03,0.056,0.042,0.168,0.404,0.429,0.237,0.088,0.146,0.427,0.361,0.237,0.095,0.063,0.067,0.252,0.077	0.474,0.161,0.243,0.077,0.369,0.088,0.146,0.097,0.05,0.211,0.015,0.03,0.084,0.106,0.113,0.136,0.146,0.434,0.561,0.107,0.05,0.048,0.72,0.581,0.248,0.148,0.175,0.085,0.262,0.057
NM_001040048.474_504	......(((((...)))))...........	...((.(((((...)))))......))...	0.12,0.121,0.262,0.284,0.383,0.077,0.095,0.088,0.028,0.057,0.805,0.519,0.371,0.181,0.223,0.021,0.002,0.113,0.404,1.0,0.713,0.918,0.821,0.619,0.405,0.083,0.277,0.655,0.576,0.821	0.0,0.0,0.119,0.108,0.482,0.051,0.23,0.0,0.0,0.022,0.476,0.643,0.1,0.279,0.41,0.024,0.002,0.026,0.575,1.0,0.592,0.843,0.767,0.565,0.306,0.0,0.0,0.833,0.285,0.619
NM_001044790.1326_1356	((((.....((.(((....))))).)))).	((((....(((((...))..)))..)))).	0.728,0.099,1.0,0.077,0.202,0.0,1.0,1.0,0.118,0.615,0.193,0.133,0.0,0.031,0.09,0.0,0.031,0.395,0.199,0.178,0.209,0.061,0.177,0.501,0.474,0.42,0.179,0.289,0.261,0.015	0.463,0.258,0.702,0.0,0.009,0.0,0.525,0.795,0.162,0.409,0.002,0.076,0.038,0.021,0.02,0.0,0.0,0.292,0.116,0.089,0.089,0.058,0.12,0.917,0.123,0.558,0.129,0.151,0.24,0.184
NM_001044799.2495_2525	(((.((((.........))))..)))....	.....((((((((......))))))))...	1.0,0.281,0.2,0.125,0.145,0.192,0.131,0.479,0.476,0.388,0.196,0.0,0.033,0.0,0.034,0.183,0.181,0.216,0.067,0.033,0.051,0.223,0.05,0.134,0.543,0.421,0.875,1.0,0.147,0.745	0.961,0.195,0.052,0.098,0.444,0.13,0.0,0.31,0.206,0.083,0.164,0.014,0.0,0.011,0.014,0.344,0.112,0.163,0.076,0.0,0.0,0.193,0.019,0.0,0.043,0.13,0.465,1.0,0.22,0.684
NM_001045023.2541_2571	...((((((.........))).))).....	...(((((............))))).....	0.633,0.455,0.032,0.149,0.068,0.617,0.279,0.048,0.296,0.763,0.607,0.525,0.034,0.037,0.083,0.082,0.698,0.3,0.438,0.107,0.319,0.127,0.024,0.079,0.115,0.775,1.0,1.0,0.311,0.061	0.824,0.466,0.215,0.038,0.13,0.074,0.056,0.132,0.248,0.366,0.567,0.175,0.009,0.0,0.0,0.122,0.474,0.319,0.38,0.096,0.24,0.009,0.01,0.041,0.026,0.51,0.863,1.0,0.173,0.178
NM_001045048.2791_2821	............(((....)))........	((((..((...))..))))...........	1.0,0.433,0.271,0.143,0.246,0.0,0.119,0.28,0.261,0.45,0.239,0.055,0.014,0.172,0.028,0.219,0.015,0.031,0.414,0.036,0.0,0.074,0.282,0.036,0.091,-1,-1,-1,-1,-1	1.0,0.181,0.071,0.093,0.547,0.0,0.049,0.076,0.178,0.419,0.109,0.007,0.029,0.306,0.0,0.003,0.03,0.0,0.15,0.0,0.0,0.0,0.093,0.086,0.018,-1,-1,-1,-1,-1
NM_001045201.1124_1154	..((...((((.......))))..))....	....((.((((.......))))...))...	0.874,0.503,0.25,0.001,0.118,0.198,0.373,0.556,0.489,0.158,0.065,0.249,0.042,0.0,0.149,0.323,0.586,0.064,0.25,0.068,0.142,0.33,0.288,0.072,0.004,0.063,0.482,0.347,0.168,0.133	0.493,0.535,0.139,0.1,0.113,0.015,0.057,0.491,0.373,0.139,0.0,0.108,0.005,0.14,0.153,0.074,0.652,0.0,0.187,0.201,0.0,0.308,0.31,0.174,0.204,0.136,0.591,0.293,0.057,0.183
NM_001045453.1399_1429	...((........))...............	...((((...)).))...............	0.948,0.319,0.429,0.703,0.377,0.034,0.017,0.104,0.183,0.191,0.665,1.0,1.0,0.034,0.185,0.203,0.105,0.001,0.0,0.448,0.611,0.596,0.287,0.392,0.057,0.0,0.143,0.258,0.228,0.197	0.481,0.368,0.857,0.457,0.0,0.0,0.0,0.0,0.0,0.009,0.104,0.948,0.298,0.0,0.099,0.135,0.075,0.274,0.0,0.304,0.336,0.155,0.03,0.245,0.031,0.0,0.0,0.185,0.114,0.0
NM_001045453.1573_1603	......(((....((((...))))..))).	.(((..(((..((....))...))).))).	0.135,0.172,0.283,0.073,0.023,0.0,0.084,0.235,0.21,0.17,0.158,0.359,0.387,0.336,0.071,0.245,0.074,-1,-1,-1,-1,-1,-1,-1,-1,-1,-1,-1,-1,-1	0.067,0.0,0.0,0.0,0.311,0.0,0.056,0.09,0.097,0.182,0.068,0.085,0.234,0.201,0.037,0.0,0.251,-1,-1,-1,-1,-1,-1,-1,-1,-1,-1,-1,-1,-1
NM_001076613.2323_2353	(((.(((((........))))).)))....	(((((((.(((((...))))).))))).))	0.209,0.637,0.826,0.186,0.307,0.173,0.525,0.263,0.47,0.674,0.31,0.508,0.268,0.287,1.0,0.883,0.944,0.55,0.304,0.034,0.129,0.004,0.058,0.023,0.161,0.136,0.681,1.0,0.473,1.0	0.0,0.188,0.576,0.0,0.523,0.092,0.492,0.485,0.386,0.405,0.158,0.136,0.238,0.136,0.745,0.931,0.518,0.186,0.317,0.066,0.0,0.042,0.0,0.0,0.149,0.103,0.607,0.62,0.0,0.585
NM_001077162.1700_1730	.........(((........))).......	((.(((....))).))..............	0.0,0.062,0.235,0.222,0.332,0.237,0.39,0.445,0.445,0.088,0.024,0.038,0.0,0.218,0.458,1.0,0.86,0.727,1.0,0.203,0.094,0.109,0.092,0.198,0.685,0.235,0.09,0.258,0.412,0.056	0.0,0.099,0.039,0.076,0.371,0.233,0.341,0.08,0.213,0.0,0.016,0.035,0.0,0.087,0.174,1.0,0.374,0.397,0.911,0.22,0.144,0.055,0.016,0.161,0.637,0.084,0.041,0.122,0.264,0.156
NM_001077247.1532_1562	...........((.((((....))))))..	.........((.((((....))))))....	0.369,0.714,0.496,0.248,0.405,0.184,0.708,1.0,0.583,0.473,0.133,0.567,0.067,0.407,0.113,0.158,0.0,0.258,0.352,0.243,0.135,0.325,0.076,0.06,0.753,0.799,0.593,0.002,0.197,0.08	0.311,0.994,0.453,0.2,0.682,0.264,0.245,0.956,0.546,0.108,0.093,0.398,0.053,0.218,0.042,0.135,0.084,0.12,0.174,0.123,0.092,0.283,0.03,0.0,0.445,0.325,0.634,0.0,0.172,0.024
NM_001077255.1622_1652	........(((((.((.......)))))))	........((((.(((.......)))))))	0.191,0.121,0.381,0.111,0.188,0.084,0.083,0.047,0.519,0.45,0.024,0.013,0.484,0.511,0.252,0.05,0.249,0.067,0.0,0.021,0.032,0.14,0.14,0.003,0.109,0.201,0.208,0.126,0.158,0.223	0.08,0.1,0.251,0.011,0.369,0.0,0.031,0.0,0.372,0.435,0.0,0.0,0.461,0.24,0.025,0.001,0.005,0.133,0.0,0.032,0.089,0.164,0.178,0.145,0.07,0.126,0.385,0.235,0.175,0.177
NM_001077341.2505_2535	..............................	...((.((...)).))..............	0.06,0.258,0.229,0.113,0.558,0.225,0.543,0.51,0.908,0.881,1.0,0.534,0.304,0.264,0.123,0.531,0.703,0.087,0.162,0.11,0.438,0.292,0.221,0.162,0.767,0.422,1.0,0.897,1.0,0.491	0.063,0.14,0.094,0.034,0.494,0.121,0.335,0.39,0.647,0.884,1.0,0.193,0.348,0.164,0.074,0.215,0.691,0.0,0.054,0.151,0.363,0.355,0.071,0.088,0.624,0.393,1.0,0.892,1.0,0.257
NM_001077601.1842_1872	..((((....))).).(((.......))).	..((((....)).)).(((.......))).	0.723,0.862,1.0,0.481,0.616,0.108,0.205,0.168,0.105,0.161,0.285,0.087,0.0,0.27,0.124,0.269,0.158,0.348,0.0,0.0,0.0,0.0,0.374,0.0,0.113,0.268,0.06,0.342,0.0,0.051	0.624,0.581,0.536,0.122,0.791,0.186,0.066,0.111,0.059,0.039,0.001,0.007,0.0,0.106,0.095,0.081,0.013,0.299,0.027,0.027,0.008,0.057,0.327,0.164,0.056,0.335,0.029,0.239,0.116,0.206
NM_001077759.1635_1665	..((((........))))............	..((((.((...))))))............	0.243,0.385,0.503,0.379,1.0,0.202,0.496,0.242,0.234,0.648,0.227,0.483,0.256,0.357,0.22,0.106,0.348,0.374,0.912,0.448,0.727,0.298,0.314,0.348,0.32,0.385,0.372,0.063,0.074,0.172	0.323,0.319,0.387,0.205,1.0,0.191,0.534,0.187,0.03,0.38,0.125,0.409,0.242,0.284,0.193,0.056,0.38,0.303,0.772,0.443,0.668,0.317,0.335,0.332,0.31,0.371,0.266,0.022,0.086,0.09
NM_001079683.2073_2103	((((.....)))).(((....)))......	(((((.((.....)).))))).........	0.011,0.128,0.12,0.318,0.507,0.103,0.949,0.517,0.276,0.456,0.06,0.098,0.0,0.15,0.227,0.459,0.256,0.031,0.142,0.182,0.069,0.699,0.213,0.159,0.271,0.957,1.0,0.528,0.227,0.365	0.066,0.057,0.021,0.038,0.347,0.134,0.763,0.557,0.103,0.785,0.206,0.078,0.14,0.02,0.244,0.136,0.276,0.095,0.02,0.006,0.057,0.355,0.163,0.082,0.459,0.67,0.94,0.205,0.906,0.257
NM_001079951.7531_7561	(((....)))......((......))....	.(((((..((.......)))).))).....	0.0,0.109,0.139,0.045,0.329,0.0,0.048,0.0,0.071,1.0,1.0,1.0,0.342,0.33,0.346,0.648,0.096,0.387,0.423,0.141,0.0,0.214,0.303,0.23,0.268,0.022,0.043,0.0,0.266,0.251	0.0,0.017,0.0,0.0,0.06,0.0,0.0,0.029,0.091,1.0,0.579,0.846,0.128,0.536,0.515,0.19,0.084,0.199,0.08,0.162,0.0,0.097,0.036,0.0,0.022,0.0,0.458,0.123,0.172,0.157
NM_001080033.471_501	.....(((..........))).........	((((.....)))).................	1.0,0.883,1.0,0.542,1.0,0.78,0.429,0.113,0.282,0.021,0.074,0.085,0.04,0.0,0.474,0.784,0.155,0.08,0.091,0.0,0.024,0.0,0.271,0.53,0.084,0.0,0.732,0.436,0.145,0.001	0.734,0.361,0.884,0.286,1.0,0.445,0.169,0.08,0.081,0.0,0.051,0.074,0.0,0.0,0.647,1.0,0.288,0.02,0.004,0.168,0.041,0.042,0.194,0.426,0.0,0.008,0.535,0.696,0.363,0.051
NM_001080185.2926_2956	......((((((........))))))....	...((..........(((....)))))...	0.739,0.383,0.329,0.145,0.014,0.0,0.178,0.342,0.447,1.0,0.352,0.436,0.267,0.4,0.147,0.201,0.471,0.328,0.118,0.568,0.608,0.261,0.181,0.153,0.176,0.037,0.027,0.043,0.033,0.0	0.935,0.396,0.362,0.289,0.155,0.0,0.202,0.554,0.303,1.0,0.555,0.755,0.277,0.235,0.438,0.108,0.481,0.235,0.0,0.505,0.607,0.304,0.063,0.113,0.221,0.053,0.0,0.112,0.014,0.048
NM_001080586.3269_3299	...(((...............)))......	...((((((....))).....)))......	1.0,1.0,0.499,0.106,0.189,0.123,0.249,0.424,0.915,0.938,1.0,0.454,0.558,0.562,0.306,0.365,0.231,0.088,0.031,0.0,0.068,0.17,0.233,0.223,0.436,0.646,0.386,0.215,0.016,0.136	0.963,0.466,0.306,0.059,0.357,0.0,0.225,0.308,0.9,0.722,1.0,0.539,0.492,0.423,0.257,0.288,0.349,0.085,0.112,0.0,0.0,0.145,0.05,0.271,0.463,0.681,0.265,0.361,0.0,0.106
NM_001082952.1802_1832	..........(((((((....))..)))))	.(((.((((....))))..)))........	0.372,0.424,0.798,0.321,1.0,0.074,0.37,0.074,0.124,0.248,0.101,0.157,-1,-1,-1,-1,-1,-1,-1,-1,-1,-1,-1,-1,-1,-1,-1,-1,-1,-1	0.304,0.195,0.624,0.156,0.526,0.0,0.288,0.133,0.025,0.193,0.193,0.046,0.0,0.031,0.0,0.0,0.581,0.174,0.17,0.209,0.349,0.1,0.0,0.0,0.638,0.226,0.067,0.0,0.439,0.18
NM_001083554.2716_2746	...((((...............))))....	...((((....(((...)))..))))....	0.657,0.32,0.688,0.036,0.447,0.0,0.105,0.727,1.0,0.56,0.394,0.811,0.215,0.485,0.179,0.073,0.14,0.3,0.301,0.41,0.123,0.315,0.252,0.17,0.225,0.2,0.601,0.199,0.065,0.032	0.112,0.309,0.428,0.123,0.42,0.057,0.073,0.695,1.0,0.224,0.189,0.669,0.07,0.272,0.111,0.025,0.133,0.439,0.074,0.118,0.036,0.055,0.059,0.102,0.018,0.007,0.244,0.028,0.0,0.129
NM_001083841.1629_1659	...((((.((.........)).))))....	.((((...)))).((....))((.....))	0.0,0.071,0.012,0.069,0.026,0.137,1.0,1.0,0.509,0.158,0.289,0.025,1.0,0.0,0.589,0.687,0.433,0.865,0.783,0.087,0.062,0.014,0.026,0.218,0.0,0.253,0.249,0.052,0.014,0.122	0.008,0.0,0.0,0.032,0.154,0.095,1.0,1.0,0.225,0.054,0.054,0.0,0.403,0.0,0.263,0.518,0.37,0.673,0.294,0.147,0.034,0.0,0.076,0.007,0.078,0.274,0.179,0.0,0.0,0.132
NM_001089469.2908_2938	...(((....((((....))))....))).	....(((...((((....)))).....)))	0.965,1.0,0.799,0.262,0.38,0.144,0.61,0.112,0.422,0.247,0.014,0.622,0.539,0.556,0.903,0.635,0.476,0.703,0.181,0.189,0.392,0.127,0.002,0.0,0.061,0.176,0.031,0.015,0.028,0.054	0.984,0.689,0.385,0.191,0.717,0.138,0.542,0.099,0.691,0.398,0.0,0.608,0.705,0.805,1.0,0.536,0.371,0.564,0.119,0.189,0.471,0.152,0.059,0.219,0.0,0.0,0.05,0.02,0.057,0.088
NM_001089520.2358_2388	............(((.((....)).)))..	((((.((.......))...)))).......	0.652,0.589,0.0,0.08,0.58,0.234,0.517,0.642,0.689,1.0,0.569,0.155,0.164,0.241,0.457,1.0,-1,-1,-1,-1,-1,-1,-1,-1,-1,-1,-1,-1,-1,-1	0.263,0.339,0.196,0.0,0.563,0.038,0.291,0.824,0.743,1.0,0.721,0.083,0.078,0.255,0.43,1.0,0.31,0.089,0.278,0.167,0.145,0.193,0.137,0.037,0.126,0.187,0.134,0.277,0.066,0.018
NM_001098177.6378_6408	..(((((((.............)))).)))	..(((((((..(((...)))..)))).)))	0.085,0.055,0.155,0.053,0.198,0.31,0.0,0.031,0.517,0.382,1.0,0.366,0.372,0.0,0.0,0.041,0.006,0.171,0.944,0.061,0.012,0.128,0.103,0.3,0.253,0.044,0.26,0.131,0.14,0.672	0.119,0.035,0.081,0.069,0.208,0.209,0.0,0.04,0.47,0.257,0.652,0.208,0.187,0.005,0.0,0.095,0.036,0.098,1.0,0.224,0.014,0.069,0.032,0.247,0.229,0.243,0.32,0.201,0.098,0.909
NM_001098740.884_914	((.((...)).))..(((......)))...	......(((..((......)).))).....	0.377,0.423,0.332,0.153,0.972,0.577,0.395,0.282,0.067,0.0,0.284,-1,-1,-1,-1,-1,-1,-1,-1,0.223,-1,0.159,0.538,0.573,0.0,0.088,0.619,1.0,0.203,0.0	0.231,0.095,0.256,0.111,0.863,0.407,0.318,0.215,0.119,0.049,0.0,0.273,0.0,0.685,0.184,0.633,0.076,0.37,0.311,0.121,0.827,0.135,0.294,0.362,0.029,0.089,0.425,1.0,0.06,0.112
NM_001102672.3900_3930	...((...((....))....))........	...((..((........)).))........	0.339,0.487,0.0,0.189,0.341,0.0,0.388,0.242,0.167,0.825,0.042,0.845,0.344,0.245,0.152,0.0,0.13,0.195,0.122,0.26,0.34,0.0,0.219,0.775,0.428,0.169,0.185,0.037,0.337,0.179	0.384,0.044,0.213,0.0,0.348,0.084,0.177,0.0,0.0,0.765,0.026,0.704,0.0,0.038,0.16,0.241,0.163,0.187,0.0,0.036,0.135,0.0,0.268,0.408,0.282,0.171,0.389,0.0,0.102,0.0
NM_001102676.3820_3850	..(((...)))...................	..(((...)))..........((....)).	0.529,0.717,0.205,0.047,0.107,0.015,0.061,0.094,0.026,0.035,0.182,0.136,0.0,0.07,0.64,1.0,1.0,0.451,0.74,0.059,0.079,0.142,0.067,0.107,0.16,0.513,0.46,0.24,0.153,0.125	0.601,0.573,0.227,0.03,0.124,0.052,0.009,0.086,0.007,0.003,0.081,0.345,0.0,0.106,0.581,1.0,1.0,0.167,0.441,0.031,0.024,0.325,0.0,0.107,0.15,0.523,0.465,0.02,0.057,0.145
NM_001105692.2728_2758	...(((...))).(((.....)))......	.((...((..((......)).))...))..	0.204,0.133,0.593,0.12,0.268,0.122,0.448,0.497,0.565,0.494,0.118,0.238,0.203,0.353,0.225,0.469,0.214,0.631,0.226,0.124,0.086,0.077,0.283,0.085,0.618,0.732,0.391,1.0,0.973,0.938	0.156,0.155,0.266,0.0,0.587,0.0,0.465,0.234,0.369,0.428,0.157,0.344,0.0,0.275,0.417,0.294,0.14,0.165,0.064,0.11,0.0,0.011,0.052,0.069,0.491,0.901,0.142,0.629,0.716,0.772
NM_001110022.2479_2509	.(((....))).......(((....)))..	((((.((.(((....)))..)).))))...	0.374,0.0,0.049,0.0,0.0,0.0,0.0,0.089,0.024,0.0,0.055,0.06,0.158,0.301,0.553,0.477,1.0,0.1,0.0,0.267,0.398,0.251,0.411,1.0,1.0,0.138,0.286,0.33,0.201,0.48	0.228,0.0,0.018,0.004,0.0,0.0,0.0,0.043,0.0,0.0,0.0,0.026,0.0,0.172,0.209,0.415,1.0,0.021,0.039,0.193,0.31,0.141,0.37,1.0,0.68,0.066,0.165,0.619,0.16,0.279
NM_001110475.2141_2171	.....(((((....)))))...........	..........(((((((......)))))))	0.062,0.164,0.0,0.0,0.316,0.094,0.0,0.592,0.001,0.259,0.289,0.133,0.177,0.255,0.0,0.063,0.173,0.156,0.279,0.567,0.744,0.896,0.162,0.201,0.326,0.224,0.09,0.228,0.122,0.061	0.07,0.082,0.083,0.025,0.0,0.0,0.0,0.531,0.218,0.367,0.246,0.087,0.04,0.082,0.0,0.01,0.091,0.015,0.134,0.65,0.551,1.0,0.038,0.119,0.06,0.228,0.131,0.005,0.213,0.019
NM_001110480.2336_2366	...(((.((......)).))).((....))	((((.((....)).))))............	0.565,0.33,0.217,0.151,0.383,0.01,0.184,0.279,1.0,0.938,1.0,0.368,0.621,0.131,0.112,0.064,0.016,0.261,0.124,0.06,0.461,0.0,0.238,0.137,0.406,0.052,0.008,0.001,0.031,0.066	0.43,0.239,0.122,0.0,0.418,0.0,0.123,0.187,1.0,0.606,0.543,0.304,0.481,0.111,0.109,0.0,0.002,0.0,0.374,0.0,0.237,0.0,0.051,0.085,0.205,0.087,0.0,0.002,0.032,0.0
NM_001111162.1550_1580	...((.(((.((.....)).))))).....	...((.(((.(((...))).))))).....	0.573,0.464,0.699,0.385,0.863,0.185,0.45,0.242,0.257,0.525,0.562,0.661,1.0,0.761,1.0,0.519,0.468,0.218,0.332,0.143,0.088,0.018,0.168,0.044,0.067,0.738,0.411,0.529,0.547,0.235	0.267,0.325,0.392,0.252,0.969,0.088,0.351,0.133,0.19,0.632,0.622,0.389,0.98,0.469,0.946,0.383,0.394,0.08,0.396,0.145,0.094,0.022,0.07,0.033,0.06,0.655,0.369,0.596,0.43,0.061
NM_001111207.1928_1958	..((((....))))................	..((((....))))......((....))..	0.272,0.048,0.066,0.0,0.116,0.0,0.114,0.321,0.838,0.467,0.297,0.092,0.069,0.0,0.102,0.531,0.333,0.33,0.212,0.382,0.33,0.193,0.67,0.29,0.057,0.226,0.204,0.079,0.566,0.593	0.223,0.009,0.02,0.021,0.007,0.0,0.151,0.317,0.851,0.285,0.226,0.048,0.095,0.005,0.046,0.528,0.393,0.268,0.165,0.281,0.308,0.166,0.749,0.293,0.004,0.154,0.29,0.023,0.541,0.644
NM_001114580.2569_2599	.((((........)))).............	.((((........))))..(((.....)))	0.161,0.297,0.267,0.077,0.223,0.059,0.148,0.085,0.605,0.436,0.839,0.429,0.42,0.215,0.474,0.121,0.308,0.357,1.0,0.611,0.419,0.299,0.283,0.162,0.142,0.719,0.43,0.109,0.096,0.357	0.093,0.135,0.161,0.026,0.256,0.021,0.159,0.0,0.475,0.371,0.796,0.398,0.209,0.341,0.429,0.076,0.212,0.119,1.0,0.418,0.273,0.372,0.15,0.083,0.101,0.656,0.163,0.081,0.089,0.238
NM_001114908.322_352	(((((....))).))...............	.....(((((.......)))))........	0.02,0.095,0.092,0.092,0.131,0.023,0.009,0.0,0.0,0.0,0.083,0.0,0.216,0.156,0.439,1.0,0.903,0.641,0.206,0.755,0.55,0.662,0.369,1.0,1.0,0.079,0.093,0.212,0.0,0.245	0.019,0.0,0.061,0.002,0.043,0.0,0.0,0.003,0.04,0.0,0.159,0.0,0.104,0.176,0.273,0.894,1.0,0.143,0.22,0.371,0.68,0.056,0.276,1.0,0.733,0.077,0.031,0.0,0.0,0.082
NM_001115140.2049_2079	...................(((....))).	...(((......)))....(((....))).	0.124,0.159,0.132,0.064,0.182,0.044,0.0,0.279,0.21,0.664,0.874,0.288,0.608,0.65,1.0,1.0,0.919,0.663,1.0,0.781,0.343,0.161,0.211,0.081,0.098,0.133,0.735,0.091,0.045,0.022	0.08,0.096,0.264,0.009,0.229,0.098,0.0,0.208,0.268,0.574,1.0,0.268,0.258,0.625,1.0,0.847,0.685,0.524,1.0,0.705,0.17,0.108,0.307,0.094,0.03,0.03,0.552,0.075,0.037,0.007
NM_001118896.1623_1653	..(((....))).(((.....)))......	((((...)))).......((((...)))).	0.081,0.023,0.0,0.0,0.056,0.203,0.402,0.306,0.287,0.185,0.0,0.015,0.313,0.229,0.904,0.222,0.653,0.108,0.079,0.258,0.009,0.351,0.131,0.462,0.388,0.785,0.479,0.498,0.131,0.132	0.03,0.0,0.0,0.007,0.13,0.083,0.264,0.126,0.171,0.063,0.049,0.034,0.154,0.087,0.995,0.161,0.466,0.0,0.0,0.073,0.04,0.253,0.124,0.256,0.344,0.509,0.29,0.185,0.043,0.037
NM_001123062.1960_1990	...((..(((........)))....))...	...((.....))..................	0.817,0.503,0.262,0.053,0.106,0.159,0.052,0.0,0.024,0.072,0.083,0.402,0.0,0.093,0.437,0.149,0.642,0.333,0.452,0.316,0.534,0.003,0.543,0.237,0.3,0.013,0.25,0.342,0.458,0.575	0.466,0.489,0.165,0.057,0.093,0.028,0.0,0.055,0.0,0.0,0.158,0.508,0.053,0.149,0.839,0.186,0.68,0.204,0.845,0.475,0.438,0.297,0.351,0.117,0.242,0.084,0.353,0.413,0.73,0.447
NM_001126476.677_707	((.((((.........))))...)).....	...((((.........))))..........	0.295,0.318,0.279,0.113,0.0,0.035,0.133,1.0,0.098,0.0,0.258,0.019,0.379,0.139,0.18,0.098,0.306,0.076,0.248,0.588,0.345,-1,-1,0.39,0.383,1.0,0.621,0.285,0.076,0.203	0.753,0.256,0.318,0.026,0.001,0.122,0.078,0.75,0.161,0.149,0.371,0.042,0.015,0.434,0.097,0.07,0.071,0.056,0.35,0.64,0.367,0.864,0.455,0.327,0.802,1.0,1.0,0.302,0.039,0.233
NM_001128353.1978_2008	...(((((...........)))))......	((.(((((...........)))))..))..	0.189,0.222,0.469,0.186,0.342,0.025,0.082,0.181,0.106,0.274,0.085,0.253,0.424,0.143,0.19,0.352,0.463,1.0,0.171,0.0,0.165,0.047,0.039,0.148,0.221,0.304,0.352,0.281,1.0,0.107	0.139,0.311,0.241,0.0,0.215,0.0,0.197,0.119,0.0,0.037,0.188,0.082,0.579,0.193,0.068,0.163,0.307,0.872,0.388,0.173,0.025,0.114,0.053,0.05,0.525,0.248,0.143,0.13,1.0,0.144
NM_001128671.2742_2772	..((.((....)))).(((........)))	..((.((....)))).(((......)))..	0.249,0.392,0.218,0.106,0.263,0.13,0.109,0.251,0.213,0.173,0.228,0.227,0.068,0.158,0.571,0.227,0.715,0.225,0.276,0.183,0.136,0.379,0.41,0.634,0.306,0.075,0.164,0.136,0.0,0.049	0.156,0.048,0.031,0.0,0.263,0.094,0.01,0.358,0.047,0.016,0.149,0.093,0.07,0.15,0.406,0.048,0.444,0.383,0.181,0.114,0.045,0.356,0.181,0.285,0.285,0.059,0.0,0.008,0.028,0.0
NM_001137665.3590_3620	............(((..((....))..)))	.(((.......((((......))))..)))	0.498,0.672,0.641,0.336,0.393,0.197,0.345,0.064,0.081,0.227,0.148,0.013,0.0,0.049,0.0,0.01,0.0,0.06,0.088,0.092,0.0,0.496,0.175,0.103,0.137,0.269,0.0,0.0,0.0,0.0	0.361,0.395,0.127,0.084,0.379,0.117,0.159,0.119,0.087,0.075,0.099,0.0,0.0,0.068,0.0,0.0,0.0,0.073,0.096,0.203,0.054,0.088,0.261,0.069,0.125,0.351,0.0,0.0,0.0,0.031
NM_001145601.4867_4897	...(((..((((........)))))))...	...(((.((.((((...)))).)))))...	0.21,0.152,0.099,0.023,0.141,0.211,0.204,0.352,0.139,0.192,0.195,0.0,0.118,0.529,0.208,0.933,0.67,0.324,0.837,0.471,0.274,0.307,0.401,0.18,0.318,0.022,0.286,0.115,0.0,0.183	0.056,0.069,0.041,0.0,0.0,0.137,0.15,0.185,0.149,0.121,0.122,0.031,0.111,0.159,0.128,0.939,0.259,0.474,0.797,0.086,0.133,0.095,0.577,0.206,0.244,0.082,0.404,0.186,0.07,0.214
NM_001159314.3319_3349	.(((((.....((....))....)))))..	.(((((.((..((....))..)))))))..	0.046,0.258,0.118,0.107,0.487,0.0,0.318,0.509,0.008,0.126,0.33,0.158,0.261,0.179,0.366,0.271,0.24,0.232,0.191,0.563,0.372,0.382,0.259,0.17,0.0,0.016,0.702,0.632,1.0,0.744	0.087,0.0,0.0,0.04,0.35,0.0,0.166,0.157,0.0,0.144,0.479,0.113,0.316,0.239,0.211,0.267,0.038,0.388,0.201,1.0,0.357,0.251,0.155,0.125,0.0,0.107,0.59,0.275,1.0,0.335
NM_001162507.2435_2465	..(((...........))).(((....)))	...((((((.....))).))).((....))	0.088,0.278,0.0,0.0,0.048,0.0,0.069,0.111,0.372,0.236,0.951,0.727,0.305,0.575,0.499,0.467,0.024,0.094,0.197,0.34,0.0,0.0,0.017,0.223,0.494,0.0,0.031,0.27,0.138,0.427	0.283,0.214,0.204,0.02,0.0,0.0,0.055,0.0,0.175,0.196,0.632,0.285,0.287,0.399,0.296,0.188,0.03,0.0,0.025,0.422,0.0,0.136,0.0,0.233,0.226,0.0,0.0,0.244,0.012,0.285
NM_001163988.1437_1467	.((.....))......(((.......))).	........(((......)))..........	0.287,0.164,0.099,0.12,0.205,0.044,0.088,0.077,0.0,0.135,0.067,0.184,0.039,0.022,0.074,-1,-1,-1,-1,-1,-1,-1,-1,-1,-1,-1,-1,-1,-1,-1	0.006,0.14,0.039,0.053,0.174,0.031,0.066,0.033,0.017,0.038,0.024,0.082,0.047,0.021,0.058,-1,-1,-1,-1,-1,-1,-1,-1,-1,-1,-1,-1,-1,-1,-1
NM_001171033.1264_1294	....((.((((.......))))...))...	.......((((.......))))........	1.0,0.498,0.572,0.017,0.269,0.0,0.122,0.455,0.186,0.142,0.144,0.204,0.212,0.069,0.315,0.246,0.316,0.095,0.378,0.253,0.122,0.44,0.372,0.0,0.062,0.114,0.188,0.366,0.358,0.248	0.461,0.463,0.274,0.148,0.107,0.1,0.065,0.598,0.227,0.068,0.0,0.169,0.213,0.08,0.248,0.272,0.787,0.015,0.636,0.344,0.149,0.249,0.393,0.096,0.11,0.164,0.67,0.638,0.083,0.012
NM_001198891.642_672	...((....)).((((......))))....	((.((....)))).((((......)).)).	0.535,0.496,0.525,0.151,0.374,0.318,0.009,0.372,0.252,0.0,0.0,0.151,0.055,0.061,0.158,0.006,0.108,0.316,0.075,0.085,0.389,0.557,0.15,0.093,0.09,0.267,0.393,0.111,0.021,0.314	0.274,0.149,0.163,0.019,0.291,0.077,0.144,0.171,0.144,0.059,0.0,0.0,0.085,0.142,0.068,0.0,0.104,0.124,0.056,0.0,0.164,0.618,0.02,0.037,0.0,0.339,0.751,0.0,0.038,0.187
NM_001202493.6429_6459	...((....)).((...((((...))))))	((.((....))....))((((...))))..	0.561,0.479,0.481,0.373,0.248,0.826,0.647,0.364,0.772,0.144,0.328,0.974,0.601,0.405,0.17,0.0,0.068,0.081,0.0,0.0,0.607,1.0,1.0,0.986,0.085,0.012,0.023,0.036,0.011,0.0	0.105,0.399,0.29,0.456,0.194,0.117,0.293,0.479,0.302,0.168,0.0,0.0,0.778,0.0,0.08,0.042,0.048,0.0,0.0,0.028,0.103,0.319,0.796,0.346,0.236,0.0,0.031,0.0,0.0,0.085
NM_001243034.786_816	...((((((....))).......)))....	...((((((....)))).......))....	0.345,0.306,0.324,0.092,0.0,0.0,0.058,0.296,0.25,0.869,0.506,0.08,0.071,0.132,0.254,0.183,0.33,0.419,0.651,0.508,1.0,0.754,0.378,0.601,0.112,0.182,0.114,0.304,0.021,0.143	0.303,0.395,0.213,0.064,0.134,0.0,0.017,0.117,0.203,0.726,0.622,0.087,0.019,0.089,0.172,0.223,0.326,0.298,0.329,0.519,1.0,0.763,0.325,0.392,0.058,0.463,0.235,0.486,0.163,0.24
NM_001243148.395_425	...(((....))).((........))....	...((.((.(((........))).))..))	0.447,0.242,0.504,0.0,0.299,0.055,0.489,0.705,0.504,0.321,0.444,0.078,0.428,0.0,0.13,0.394,1.0,0.608,0.599,0.302,0.223,0.0,0.139,0.177,0.0,0.102,0.266,0.163,0.0,0.285	0.181,0.099,0.317,0.006,0.112,0.018,0.023,0.506,0.361,0.364,0.06,0.032,0.77,0.101,0.073,0.602,0.845,0.393,0.421,0.121,0.267,0.087,0.31,0.004,0.08,0.186,0.142,0.16,0.043,0.052
NM_001256189.2465_2495	..(((.............))).........	((((..((.........))..)))).....	0.705,0.204,0.173,0.038,0.292,0.041,0.12,0.338,0.326,0.958,0.729,0.33,0.515,0.995,1.0,0.442,0.413,0.206,0.06,0.087,0.0,0.162,0.267,0.113,0.333,0.215,0.175,0.676,0.277,0.652	0.488,0.0,0.2,0.0,0.154,0.0,0.052,0.204,0.285,1.0,0.524,0.285,0.159,0.666,1.0,0.174,0.309,0.192,0.032,0.138,0.0,0.135,0.176,0.042,0.364,0.21,0.242,0.959,0.303,0.519
NM_001256642.2112_2142	..........((((........))))....	........((((((........)))).)).	0.257,0.401,0.474,0.0,0.056,0.019,0.169,0.187,0.347,0.225,0.398,0.551,0.388,0.643,0.294,0.385,0.632,0.932,0.302,0.569,0.272,0.407,0.636,0.524,0.134,0.089,0.228,0.796,0.506,0.638	0.124,0.163,0.243,0.024,0.053,0.0,0.088,0.172,0.189,0.125,0.304,0.367,0.426,0.525,0.163,0.163,0.508,1.0,0.104,0.519,0.123,0.126,0.62,0.505,0.0,0.098,0.155,0.94,0.207,0.519
NM_001277124.1008_1038	....((.((((.......))))...))...	..((...((((.......))))..))....	0.792,0.728,0.402,0.138,0.095,0.121,0.065,0.472,0.239,0.206,0.01,0.149,0.125,0.201,0.195,0.389,0.4,0.079,0.15,0.141,0.142,0.226,0.268,0.088,0.049,0.103,0.473,0.479,0.073,0.0	0.501,0.344,0.13,0.021,0.051,0.157,0.126,0.502,0.152,0.09,0.147,0.203,0.0,0.151,0.05,0.225,0.388,0.108,0.098,0.213,0.092,0.182,0.149,0.071,0.0,0.098,0.483,0.344,0.3,0.096
NM_001277234.2408_2438	((.(((.............)))))......	((.(((....((.....)))))))......	0.008,0.282,0.58,0.122,0.76,0.045,0.186,0.0,0.346,0.1,0.483,0.977,0.564,1.0,0.959,1.0,0.547,0.748,0.62,0.359,0.259,0.379,0.171,0.131,0.414,0.147,0.863,1.0,0.415,0.081	0.033,0.0,0.31,0.007,0.331,0.115,0.155,0.042,0.338,0.075,0.295,0.579,0.667,1.0,0.371,1.0,0.319,0.582,0.144,0.375,0.044,0.219,0.099,0.15,0.337,0.167,0.969,1.0,0.148,0.211
NM_001301358.2034_2064	.(((.(((......))))))..........	...(((....(((...))))))........	0.966,0.869,0.226,0.076,0.258,0.0,0.281,0.689,0.513,0.52,0.365,1.0,0.144,0.0,0.014,0.194,0.0,0.0,0.071,0.182,0.043,0.067,0.154,0.145,0.613,0.542,0.436,0.722,0.043,0.056	0.813,0.605,0.211,0.0,0.041,0.0,0.135,0.749,0.16,0.389,0.163,0.922,0.054,0.0,0.0,0.149,0.0,0.017,0.095,0.072,0.0,0.0,0.077,0.11,0.313,0.462,0.242,0.67,0.0,0.021
NM_001302222.2857_2887	((((((((.(((......)))))))).)))	(((.(((((((((....))))).)))))))	0.088,0.328,0.284,0.149,1.0,0.166,0.13,0.051,0.271,0.178,0.083,0.203,0.395,0.174,0.696,0.567,0.457,1.0,1.0,0.711,0.183,0.235,0.052,0.193,0.012,0.105,0.016,0.088,0.151,0.106	0.499,0.356,0.355,0.131,0.786,0.149,0.124,0.05,0.01,0.038,0.056,0.227,0.218,0.193,0.189,0.455,0.464,1.0,0.697,0.945,0.224,0.198,0.069,0.162,0.0,0.104,0.0,0.022,0.031,0.095
NM_001305464.5093_5123	........((.....)).............	....((..((.....))...))........	0.289,0.283,0.619,0.009,0.191,0.0,0.0,0.202,0.0,0.287,0.886,0.574,0.644,0.516,0.4,0.126,0.0,0.567,0.776,0.46,0.375,0.684,0.858,1.0,0.584,0.464,0.65,0.414,0.371,0.417	0.006,0.153,0.343,0.047,0.078,0.0,0.018,0.056,0.0,0.02,0.601,0.087,0.465,0.286,0.166,0.0,0.079,0.287,0.991,0.133,0.037,0.746,0.858,1.0,0.473,0.277,0.326,0.186,0.151,0.334
NM_001305583.2171_2201	......(((...)))((((....))))...	.(((((.(((....)))......)))))..	0.277,0.536,1.0,0.293,0.477,0.664,0.284,0.439,0.044,0.286,0.346,0.861,0.531,0.222,0.275,0.242,0.032,0.311,0.196,0.655,1.0,1.0,0.663,0.324,0.141,0.056,0.326,0.376,0.166,0.39	0.175,0.373,0.822,0.14,0.124,0.155,0.067,0.39,0.083,0.256,0.168,0.679,0.242,0.111,0.199,0.076,0.053,0.333,0.252,0.455,1.0,0.951,0.561,0.122,0.072,0.006,0.276,0.498,0.141,0.401
NM_001308548.2946_2976	...(((......)))...............	((((.......))))...............	0.097,0.066,0.255,0.091,0.009,0.0,0.135,0.742,0.34,0.492,0.147,0.393,0.027,0.081,0.0,0.0,0.561,0.154,0.128,0.376,0.211,0.678,0.473,0.167,0.421,0.694,0.463,0.437,0.111,0.219	0.0,0.0,0.009,0.0,0.522,0.0,0.266,0.468,0.426,0.481,0.144,0.0,0.068,0.152,0.129,0.108,0.048,0.627,0.111,0.731,0.347,0.8,0.728,0.0,0.241,0.302,0.305,0.517,0.0,0.0
NM_001320078.4729_4759	.((((.......)))).((...))......	........(((((((......))).)))).	0.106,0.135,0.334,0.029,0.366,0.055,0.463,0.206,0.014,0.182,0.092,0.0,0.0,0.046,0.044,0.046,0.045,0.0,0.048,0.284,0.0,0.084,0.033,0.412,0.304,0.373,0.614,0.151,0.371,0.064	0.025,0.099,0.371,0.179,0.269,0.101,0.258,0.157,0.117,0.052,0.012,0.12,0.078,0.026,0.167,0.0,0.16,0.0,0.028,0.047,0.0,0.038,0.051,0.184,0.479,0.34,0.515,0.311,0.17,0.266
NM_001320078.5232_5262	.((((.......)))).((...))......	........(((((((......))).)))).	0.05,0.226,0.194,0.213,0.1,0.0,0.558,0.042,0.089,0.341,0.093,0.066,0.097,0.061,0.054,0.057,0.115,0.0,0.14,0.24,0.149,0.098,0.0,0.063,0.296,0.124,0.358,0.242,0.151,0.0	0.13,0.305,0.307,0.113,0.537,0.068,0.066,0.044,0.115,0.245,0.051,0.029,0.01,0.02,0.02,0.066,0.0,0.0,0.157,0.029,0.056,0.0,0.029,0.1,0.169,0.19,0.251,0.606,0.165,0.119
NM_001320439.3341_3371	.(((((....)))))...............	.(((((....)))))...((......))..	0.182,0.149,0.0,0.057,0.086,0.14,0.216,0.319,0.056,0.047,0.019,0.0,0.0,0.879,0.374,0.464,0.31,0.317,0.453,0.236,0.332,0.565,1.0,0.337,0.145,0.0,0.0,0.168,0.0,0.1	0.081,0.082,0.059,0.0,0.0,0.0,0.094,0.229,0.0,0.0,0.0,0.0,0.058,0.351,0.421,0.296,0.073,0.328,0.484,0.093,0.313,0.364,1.0,0.157,0.235,0.0,0.03,0.107,0.019,0.083
NM_001326392.4263_4293	...........(((........))).....	..............................	0.064,0.005,0.005,0.045,0.183,0.127,0.31,0.428,0.271,0.318,0.155,0.043,0.016,0.0,0.026,0.07,0.031,0.159,0.0,0.145,0.0,0.227,0.045,0.142,0.089,0.172,0.0,0.147,0.036,0.203	0.159,0.179,0.06,0.0,0.114,0.32,0.508,0.407,0.361,0.54,0.388,0.234,0.296,0.06,0.161,0.207,0.081,0.245,0.053,0.07,0.011,0.095,0.121,0.162,0.0,0.045,0.0,0.312,0.073,0.385
NM_001326548.1165_1195	.....(((..(((......)))...)))..	...(((....(((......)))...)))..	0.0,0.099,0.011,0.103,0.263,0.0,-1,0.0,0.302,0.464,0.116,0.444,-1,0.211,0.348,0.16,0.253,-1,-1,-1,-1,0.29,-1,-1,-1,0.416,0.199,-1,0.0,0.193	0.011,0.049,0.0,0.0,0.0,0.012,0.0,0.104,0.106,0.307,0.268,0.132,0.345,0.178,0.047,0.077,0.047,0.051,0.362,0.145,0.12,0.155,0.071,0.939,0.02,0.149,0.332,0.609,0.0,0.124
NM_001326693.2100_2130	.....(((.............)))......	.(((.(((.............))).)))..	0.737,0.635,0.565,0.135,0.157,0.103,0.17,0.198,0.616,1.0,0.836,1.0,0.958,1.0,0.81,1.0,0.705,0.165,1.0,0.235,0.244,0.545,0.404,0.052,0.146,0.431,0.6,0.925,0.364,0.0	0.69,0.476,0.0,0.106,0.279,0.0,0.093,0.155,0.391,1.0,0.74,1.0,0.645,1.0,0.443,0.849,0.876,0.223,0.564,0.167,0.061,0.237,0.0,0.0,0.008,0.047,0.315,1.0,0.042,0.0
NM_001328125.3463_3493	(((((...................))))).	(((((.((......))........))))).	1.0,1.0,1.0,0.354,0.723,0.198,0.104,0.118,0.286,0.61,0.606,0.395,0.549,0.315,0.157,0.834,1.0,0.875,0.558,0.54,0.095,0.507,0.142,0.268,0.077,0.0,0.0,0.147,0.171,0.029	0.611,0.634,0.577,0.129,0.406,0.0,0.042,0.0,0.0,0.77,0.16,0.118,0.274,0.168,0.0,0.28,0.904,0.455,0.133,0.505,0.015,0.287,0.136,0.253,0.085,0.184,0.0,0.0,0.0,0.0
NM_001328509.1351_1381	..((((((((......))))...))))...	..((((((((.....))))....))))...	0.181,0.204,0.775,0.156,0.276,0.698,0.144,0.751,0.283,1.0,0.141,0.717,0.605,0.496,0.4,0.195,0.11,0.041,0.191,0.494,0.14,0.433,0.377,0.408,0.066,0.168,0.138,0.7,0.454,0.185	0.052,0.214,0.138,0.05,0.335,0.277,0.11,0.43,0.227,0.626,0.098,0.794,0.463,0.626,0.227,0.195,0.011,0.0,0.127,0.73,0.062,0.33,0.288,0.046,0.0,0.0,0.041,0.746,0.122,0.115
NM_001346164.2692_2722	((..(((..............)))..))..	((.(((((..........)))))...))..	-1,0.118,0.0,0.154,0.269,0.163,1.0,0.386,0.207,1.0,1.0,1.0,1.0,1.0,0.409,0.839,0.922,0.447,0.713,0.889,0.49,0.294,0.093,0.0,0.0,0.0,0.0,0.0,0.0,0.0	0.171,0.0,0.02,0.174,0.16,0.351,0.806,0.523,0.23,0.533,1.0,1.0,0.612,0.656,0.424,0.079,0.241,0.244,0.807,0.67,0.172,0.043,0.131,0.0,0.06,0.0,0.0,0.0,0.148,0.232
NM_001347683.5385_5415	...((((...((......))...))))...	(((.(((...((......))...)))))).	0.168,0.195,0.361,0.063,0.355,0.245,0.149,0.214,0.087,0.095,0.13,0.36,0.554,0.317,0.317,0.221,0.077,0.0,0.164,0.148,0.06,0.012,0.151,0.0,0.021,0.011,0.033,0.281,0.198,0.313	0.0,0.0,0.369,0.002,0.309,0.091,0.0,0.169,0.013,0.102,0.178,0.197,0.493,0.13,0.296,0.248,0.165,0.056,0.168,0.133,0.045,0.018,0.084,0.018,0.1,0.086,0.089,0.424,0.203,0.717
NM_001347881.4594_4624	.................((((.....))))	....(((.(((.......)))......)))	0.308,0.461,0.454,0.117,0.697,0.2,0.015,0.313,0.229,0.266,0.102,0.057,0.067,0.323,0.472,0.777,0.764,1.0,0.195,0.036,0.267,0.903,0.887,1.0,0.521,0.342,0.27,0.181,0.069,0.499	0.174,0.056,0.0,0.0,0.159,0.052,0.0,0.045,0.0,0.077,0.0,0.0,0.006,0.277,0.389,1.0,0.365,0.634,0.149,0.188,0.002,1.0,0.999,1.0,0.035,0.055,0.081,0.071,0.0,0.555
NM_001353835.15807_15837	...(((....))).(((.........))).	..((((....))))(((.........))).	0.617,0.833,0.601,0.413,0.499,0.345,0.033,0.43,0.254,0.011,0.223,0.246,0.173,0.057,0.573,0.13,0.315,0.719,0.329,0.397,0.22,0.0,0.68,0.346,0.0,0.217,0.152,0.021,0.503,0.262	0.581,0.352,0.479,0.076,0.115,0.032,0.186,0.082,0.0,0.073,0.227,0.072,0.141,0.206,0.242,0.299,0.176,0.134,0.197,0.061,0.127,0.11,0.596,0.286,0.165,0.134,0.237,0.0,0.267,0.168
NM_001353866.4077_4107	.((......)).((((........))))..	(((......)))((((((...))).)))..	1.0,1.0,0.893,0.393,0.545,0.0,0.0,0.46,0.687,0.131,0.369,0.43,0.221,0.313,0.135,0.229,0.409,0.131,0.808,0.233,0.677,0.956,0.059,-1,-1,-1,-1,-1,-1,-1	0.305,0.501,0.829,0.312,0.0,0.0,0.0,0.276,0.501,0.305,0.033,0.0,0.0,0.0,0.0,0.028,0.183,0.118,0.301,0.331,0.448,0.462,0.179,0.029,0.334,0.0,0.087,0.059,0.092,0.389
NM_130976.2166_2196	.((((.((.((.....)).)))).))....	.((((.((.((.....)).))).)))....	0.655,0.42,0.287,0.109,0.373,0.209,0.0,0.209,0.42,0.488,0.838,1.0,0.016,0.045,0.0,0.0,0.009,0.016,0.082,0.085,0.053,0.0,0.0,0.127,0.208,0.266,0.595,0.766,0.391,0.141	0.499,0.375,0.141,0.016,0.437,0.01,0.212,0.053,0.145,0.363,0.498,1.0,0.057,0.045,0.0,0.0,0.0,0.0,0.0,0.0,0.058,0.023,0.0,0.0,0.144,0.197,0.709,1.0,0.295,0.182
NM_131345.2919_2949	..(((...........)))...........	..(((...((...)).)))...........	0.124,0.297,0.569,0.148,0.354,0.042,0.145,0.26,0.269,0.511,0.969,0.269,0.302,0.21,0.004,0.025,0.009,0.042,0.061,0.159,0.301,0.289,0.518,0.297,0.153,0.627,0.712,0.29,0.377,0.705	0.024,0.114,0.31,0.066,0.251,0.075,0.155,0.043,0.047,0.388,1.0,0.22,0.104,0.035,0.018,0.0,0.0,0.042,0.066,0.084,0.572,0.065,0.857,0.142,0.027,0.788,0.604,0.139,0.381,0.701
NM_131366.1928_1958	...(((...((((......))))....)))	(((......((((......))))....)))	0.153,0.254,0.219,0.004,0.393,0.46,1.0,0.925,0.738,0.04,0.0,0.0,0.245,0.126,0.661,0.461,0.796,0.325,0.127,0.063,0.067,0.107,0.315,1.0,0.276,0.74,0.416,0.403,0.109,0.419	0.053,0.028,0.126,0.045,0.24,0.315,0.684,0.43,0.391,0.0,0.0,0.014,0.151,0.076,0.546,0.272,0.847,0.337,0.1,0.036,0.044,0.026,0.303,1.0,0.027,0.51,0.245,0.138,0.067,0.216
NM_131637.1372_1402	((((......))))....(((...)))...	.............(((........)))...	0.206,0.096,0.042,0.015,0.046,0.0,0.0,0.0,0.0,0.061,0.04,0.159,0.011,0.0,0.001,0.0,0.084,0.134,0.264,0.338,0.147,0.964,0.103,0.06,0.051,0.116,0.18,0.39,0.502,0.203	0.229,0.172,0.023,0.021,0.077,0.0,0.0,0.0,0.079,0.071,0.116,0.233,0.14,0.085,0.0,0.064,0.27,0.182,0.388,0.416,0.186,1.0,0.089,0.185,0.078,0.215,0.042,0.518,0.694,0.215
NM_131664.1432_1462	........((..(((......)))..))..	..((.((..((((......)))).))))..	0.363,0.277,0.287,0.948,0.833,0.452,0.018,0.091,0.312,0.254,0.555,0.606,0.895,0.606,0.11,0.696,1.0,0.391,1.0,0.606,0.858,0.791,0.926,0.642,0.452,0.083,0.134,0.0,0.335,0.34	0.322,0.227,0.21,0.476,0.629,0.265,0.0,0.007,0.221,0.113,0.177,0.302,0.799,0.33,0.168,0.235,1.0,0.108,0.967,0.32,0.458,0.662,0.569,0.364,0.421,0.062,0.134,0.0,0.222,0.374
NM_131715.1944_1974	.................(((.....)))..	.((.((...........)).))........	0.189,0.207,0.295,0.005,0.276,0.016,0.0,0.104,0.0,0.894,0.42,0.4,0.306,0.678,0.9,0.26,0.101,0.079,0.237,0.589,0.32,0.19,1.0,0.412,0.794,0.19,0.139,0.975,0.408,0.848	0.095,0.009,0.057,0.082,0.213,0.026,0.016,0.0,0.0,0.623,0.343,0.134,0.171,0.723,0.852,0.118,0.036,0.022,0.499,0.92,0.431,0.272,1.0,0.393,0.828,0.169,0.261,0.721,0.232,0.755
NM_131790.2651_2681	.......((.(((((......))))).)).	.(((((...)).))).(((((...))))).	0.068,0.091,0.115,0.07,0.232,0.0,0.088,0.065,0.044,0.054,0.151,0.132,0.153,0.07,0.558,0.189,0.269,0.3,0.57,0.445,0.245,0.049,0.717,0.179,0.117,0.152,0.278,0.245,0.36,0.344	0.027,0.051,0.127,0.052,0.075,0.013,0.052,0.058,0.0,0.004,0.075,0.041,0.019,0.0,0.338,0.113,0.013,0.0,0.18,0.024,0.196,0.0,0.562,0.087,0.074,0.003,0.11,0.189,0.44,0.252
NM_145118.6202_6232	......(((((((........)))).))).	......(((((((........))).)))).	1.0,1.0,0.402,0.118,0.133,0.005,0.043,0.249,0.729,0.15,0.086,0.038,0.148,0.33,0.819,1.0,0.661,0.718,0.971,1.0,0.588,0.046,0.0,0.006,0.553,0.494,0.217,0.107,0.029,0.069	1.0,1.0,0.326,0.085,0.0,0.0,0.0,0.191,0.436,0.071,0.044,0.003,0.051,0.232,0.47,0.824,0.206,0.593,0.372,0.315,0.199,0.0,0.0,0.074,0.796,0.161,0.16,0.0,0.018,0.103
NM_152972.1918_1948	.......((((..........)))).....	.((((...))))..................	0.087,0.317,0.461,0.171,0.616,0.0,0.297,0.1,0.038,0.023,0.113,0.108,0.094,0.338,0.856,0.235,0.667,1.0,0.661,1.0,0.593,0.373,0.298,0.065,0.763,0.312,0.098,0.002,0.151,0.248	0.06,0.234,0.223,0.097,0.588,0.0,0.121,0.0,0.015,0.0,0.0,0.089,0.003,0.131,0.656,0.22,0.461,0.956,0.404,1.0,0.411,0.142,0.199,0.128,0.651,0.073,0.019,0.0,0.187,0.109
NM_173221.1643_1673	...(((((......)))).).(((...)))	..((((((......)))).))(((...)))	0.176,0.065,0.526,0.382,0.621,0.274,0.268,0.035,0.073,0.228,0.134,0.403,0.423,0.56,0.59,0.119,0.071,0.0,0.0,0.0,0.134,0.028,0.055,0.232,0.306,0.236,0.085,0.276,0.087,0.379	0.072,0.038,0.419,0.052,0.448,0.022,0.0,0.137,0.288,0.197,0.03,0.392,0.158,0.544,0.409,0.105,0.04,0.138,0.0,0.006,0.082,0.091,0.044,0.561,0.196,0.142,0.009,0.174,0.119,0.213
NM_173237.1475_1505	((....))....(((((......))..)))	((.(((((......))......))).))..	0.146,0.407,0.294,0.186,0.246,0.116,0.016,0.088,0.097,0.74,1.0,0.298,0.0,0.0,0.0,0.0,0.0,0.0,0.0,0.139,0.059,0.015,0.0,0.0,0.0,0.253,0.318,0.17,0.0,0.0	0.113,0.191,0.249,0.0,0.242,0.0,0.066,0.052,0.013,0.786,1.0,0.169,0.0,0.0,0.0,0.0,0.0,0.0,0.0,0.088,0.107,0.0,0.0,0.0,0.019,0.209,0.096,0.058,0.0,0.007
NM_194406.3716_3746	(((..((....))..)))............	((((.....)))).((((....))))....	0.152,0.099,0.151,0.121,0.165,0.166,0.23,0.0,0.174,0.155,0.427,0.205,0.331,1.0,0.049,0.108,0.249,0.434,0.08,0.171,0.376,0.424,0.14,0.332,0.31,0.364,0.577,0.019,0.118,0.522	0.083,0.014,0.013,0.041,0.196,0.0,0.0,0.0,0.055,0.071,0.159,0.28,0.257,0.885,0.106,0.09,0.035,0.765,0.067,0.303,0.327,0.35,0.122,0.224,0.175,0.11,0.561,0.0,0.09,0.311
NM_198375.1674_1704	.........((((......)))).......	.(((....))).(((...))).........	0.455,0.609,0.462,0.157,0.127,0.169,0.25,0.0,0.108,0.538,0.032,0.0,0.0,0.0,0.0,0.04,0.158,0.221,0.182,0.14,0.383,0.806,0.458,0.211,0.787,0.494,0.554,0.231,0.172,0.0	0.2,0.331,0.21,0.054,0.204,0.172,0.059,0.0,0.014,0.419,0.0,0.0,0.022,0.0,0.0,0.021,0.133,0.184,0.052,0.0,0.317,1.0,0.138,0.177,1.0,0.254,0.6,0.006,0.0,0.0
NM_199272.2479_2509	........((......))............	..(((..((...))..)))...........	0.576,0.828,0.805,0.334,0.769,0.294,0.219,0.385,0.386,0.045,0.291,0.143,0.266,0.212,0.132,0.066,0.149,0.226,0.174,0.0,0.0,0.0,0.053,0.0,0.117,0.0,0.076,0.553,0.126,0.197	1.0,0.599,0.693,0.423,0.679,0.186,0.082,0.009,0.128,0.0,0.435,0.103,0.469,0.0,0.037,0.03,0.127,0.232,0.0,0.002,0.055,0.0,0.229,0.055,0.133,0.0,0.0,0.362,0.062,0.206
NM_199547.1654_1684	..(((((..((((....))))...))))).	.((((((..((((....))))...))))))	0.39,0.647,0.646,0.241,0.645,0.191,0.247,0.123,0.269,0.381,0.348,0.502,0.533,0.668,0.406,0.254,0.52,0.832,0.182,0.405,0.073,0.0,0.154,0.276,0.0,0.189,0.202,0.085,0.302,1.0	0.099,0.382,0.484,0.179,0.566,0.091,0.154,0.072,0.207,0.443,0.226,0.149,0.162,0.239,0.216,0.047,0.559,0.76,0.1,0.286,0.0,0.001,0.018,0.144,0.0,0.18,0.135,0.105,0.112,1.0
NM_199562.1429_1459	...(((....(((.....))).....))).	..((((((......)).)))).........	0.407,0.757,0.872,0.246,0.579,0.0,0.374,1.0,1.0,0.634,0.4,0.0,0.0,0.041,0.065,0.395,0.814,0.258,0.054,0.208,0.062,0.13,0.306,0.263,0.538,0.154,0.356,0.373,0.818,0.582	0.139,0.408,0.273,0.118,0.495,0.0,0.382,0.769,0.832,0.486,0.206,0.0,0.021,0.041,0.013,0.424,0.303,0.107,0.056,0.087,0.035,0.14,0.205,0.307,0.284,0.031,0.131,0.227,0.773,0.213
NM_199570.542_572	...((.((.(..........))).))....	.............(((.....)))......	0.182,0.422,0.403,0.221,0.611,0.221,1.0,0.603,0.299,0.823,0.323,0.978,0.698,0.527,0.951,1.0,1.0,0.514,0.351,0.365,0.504,0.257,0.049,0.148,0.0,0.025,0.081,0.352,0.743,0.239	0.081,0.107,0.633,0.269,0.446,0.129,0.576,0.813,0.089,0.518,0.24,0.749,0.404,0.071,0.651,1.0,1.0,0.29,0.043,0.22,0.28,0.0,0.024,0.0,0.013,0.002,0.074,0.176,0.273,0.132
NM_199671.932_962	(((((....................)))))	(((((.....((.....))......)))))	0.572,0.583,0.772,0.277,0.963,0.108,0.496,0.616,0.522,1.0,0.596,0.573,0.153,0.023,0.024,0.044,0.028,0.172,0.355,0.96,0.545,0.387,0.377,0.232,0.165,0.066,0.038,0.062,0.304,0.293	0.179,0.244,0.475,0.067,0.657,0.036,0.271,0.289,0.428,1.0,0.237,0.269,0.032,0.029,0.012,0.007,0.011,0.143,0.299,0.531,0.374,0.538,0.256,0.235,0.158,0.074,0.014,0.011,0.416,0.202
NM_199694.1246_1276	............((((((....))..))))	............((((((....)))..)))	0.995,0.843,0.904,0.635,1.0,0.263,0.225,0.135,0.135,0.358,0.104,0.133,0.111,0.128,0.158,0.184,0.346,0.147,0.093,0.353,1.0,0.881,0.127,0.184,0.53,0.187,0.29,0.088,0.041,0.034	1.0,0.773,0.654,0.532,1.0,0.091,0.109,0.212,0.142,0.278,0.024,0.06,0.075,0.226,0.16,0.124,0.205,0.019,0.036,0.16,1.0,0.529,0.082,0.082,0.49,0.121,0.177,0.063,0.082,0.035
NM_199707.2667_2697	........((...(((...)))....))..	......(((...)))(((......)))...	1.0,0.579,0.596,0.163,0.354,0.053,0.117,0.484,0.138,0.362,0.401,0.565,0.261,0.39,0.0,0.0,0.117,0.318,0.315,0.056,0.066,0.035,0.084,0.185,0.047,0.021,0.11,0.063,0.618,1.0	0.963,0.335,0.316,0.196,0.595,0.009,0.02,0.379,0.0,0.329,0.237,0.667,0.097,0.319,0.0,0.0,0.0,0.241,0.236,0.07,0.064,0.046,0.274,0.045,0.041,0.051,0.161,0.064,0.726,1.0
NM_199729.1692_1722	.....((((((..........))))))...	.....((((.......))))..........	0.468,0.226,0.189,0.062,0.127,0.0,0.0,0.09,0.016,0.063,0.058,0.336,0.239,0.01,0.147,0.021,0.179,0.233,0.316,0.63,0.534,0.437,0.784,0.309,0.516,0.51,0.286,0.158,0.31,0.473	0.498,0.35,0.231,0.087,0.24,0.004,0.01,0.275,0.033,0.084,0.147,0.288,0.337,0.0,0.16,0.153,0.083,0.149,0.248,0.604,0.606,0.665,0.785,0.233,0.583,0.57,0.198,0.232,0.617,0.462
NM_199734.914_944	.(((...))).((((..........)).))	.(((...)))...(((((......)).)))	0.0,0.0,0.0,0.0,0.169,0.0,0.116,0.015,0.294,0.358,0.989,0.188,0.133,0.02,0.134,0.176,0.351,0.717,0.876,0.175,0.515,0.615,0.178,0.0,0.245,0.257,0.358,0.375,0.317,0.197	0.0,0.0,0.034,0.007,0.193,0.023,0.071,0.017,0.153,0.255,1.0,0.122,0.045,0.0,0.14,0.048,0.14,0.576,0.505,0.059,0.531,0.701,0.064,0.0,0.194,0.272,0.186,0.259,0.278,0.104
NM_199767.2403_2433	..............................	.......((((.(((...))).))))....	0.251,0.399,0.147,0.191,0.075,0.051,0.038,0.211,0.184,0.118,0.196,0.588,0.748,0.246,0.192,0.055,0.098,0.0,0.523,0.183,0.279,0.152,0.432,0.81,1.0,0.341,0.382,0.343,0.294,0.27	0.146,0.144,0.0,0.032,0.075,0.052,0.011,0.439,0.363,0.225,0.12,0.325,0.45,0.209,0.238,0.0,0.066,0.068,0.285,0.024,0.0,0.275,0.0,0.569,1.0,0.036,0.579,0.274,0.136,0.0
NM_199769.1507_1537	......(((((((...))))).))......	......(((((((...)))).)))......	0.421,0.454,0.371,0.193,0.383,0.138,0.186,0.187,0.081,0.525,0.472,0.0,0.101,0.218,0.113,0.136,0.29,0.25,0.18,0.045,0.094,0.343,0.051,0.252,0.094,0.436,0.344,0.253,0.483,0.68	0.388,0.208,0.207,0.084,0.358,0.036,0.123,0.091,0.028,0.637,0.203,0.0,0.082,0.11,0.07,0.06,0.392,0.431,0.102,0.0,0.062,0.148,0.045,0.16,0.024,0.49,0.052,0.291,0.722,0.734
NM_199771.1231_1261	......(((....)))..(((....)))..	(((((.(((......))).)).....))).	0.029,0.091,0.335,0.378,0.937,1.0,0.447,0.659,0.177,0.045,0.024,0.085,0.181,0.017,0.003,0.003,0.008,0.047,0.039,0.0,0.012,0.665,0.212,0.431,0.283,0.523,0.554,0.554,0.885,0.214	0.0,0.067,0.103,0.197,0.557,0.591,0.267,0.302,0.072,0.0,0.044,0.058,0.094,0.005,0.01,0.012,0.0,0.014,0.009,0.0,0.0,0.325,0.077,0.065,0.13,0.305,0.201,0.191,0.287,0.044
NM_199793.1802_1832	.(((((......))))).............	((((((......))))))............	0.69,0.845,0.567,0.176,1.0,0.169,0.509,0.246,0.051,0.666,1.0,0.258,0.048,0.038,0.656,0.333,0.48,0.573,1.0,0.463,0.647,0.787,0.531,1.0,0.819,1.0,0.829,0.211,0.476,0.217	0.315,0.355,0.173,0.031,0.942,0.002,0.455,0.357,0.082,0.657,0.938,0.049,0.061,0.0,0.498,0.292,0.251,0.446,1.0,0.356,0.362,0.464,0.309,1.0,0.466,0.81,0.519,0.105,0.233,0.296
NM_199832.2656_2686	................((((....))))..	...((...))......((((....))))..	0.495,0.567,0.356,0.214,0.351,0.179,0.093,0.166,0.169,0.188,0.294,0.705,0.833,0.331,0.331,0.133,0.12,0.172,0.576,0.107,0.05,0.041,0.0,0.006,0.027,0.033,0.003,0.002,0.057,-1	0.352,0.4,0.287,0.083,0.181,0.076,0.028,0.11,0.102,0.013,0.168,0.538,0.994,0.163,0.259,0.009,0.03,0.069,0.591,0.012,0.016,0.048,0.0,0.022,0.018,0.011,0.0,0.006,0.045,-1
NM_199870.2455_2485	...((.((((....))))))..........	((.((.((((....))))))..))......	0.013,0.099,0.0,0.193,0.231,0.006,0.135,0.0,0.062,0.063,0.177,0.422,0.178,0.071,0.071,0.054,0.085,0.13,0.0,0.022,0.594,0.191,0.296,1.0,0.432,0.613,0.87,0.532,0.584,0.338	0.0,0.0,0.029,0.0,0.066,0.0,0.067,0.01,0.0,0.055,0.052,0.147,0.072,0.14,0.027,0.085,0.021,0.108,0.032,0.068,0.594,0.174,0.211,0.936,0.52,0.684,0.716,0.421,0.149,0.219
NM_199894.1472_1502	...........(((...((....))..)))	...(((.....)))................	0.528,0.592,0.777,0.219,0.309,0.036,0.383,0.399,0.805,1.0,0.411,0.601,-1,-1,-1,-1,-1,-1,-1,-1,0.136,0.236,-1,-1,-1,-1,-1,-1,0.131,0.0	0.4,0.402,0.373,0.085,0.176,0.0,0.301,0.52,0.678,0.848,0.305,0.079,0.283,0.227,0.022,0.0,0.274,0.572,0.968,0.0,0.0,0.118,0.0,0.0,0.0,0.004,0.0,0.127,0.069,0.0
NM_199951.1027_1057	(((.....))).(((((.......))))).	(((.....)))((((((.......))))))	0.385,0.45,0.196,0.3,0.506,0.105,0.534,0.097,0.314,0.338,0.071,0.244,0.303,0.459,0.123,0.126,0.068,0.457,0.882,0.202,0.431,0.457,0.369,0.558,0.047,0.169,0.152,0.439,0.586,0.297	0.321,0.178,0.251,0.17,0.884,0.118,0.374,0.284,0.218,0.44,0.118,0.0,0.139,0.608,0.157,0.005,0.055,0.768,1.0,0.0,0.238,0.22,0.003,0.251,0.002,0.143,0.0,0.147,0.68,0.202
NM_200089.2501_2531	.(((...)))....((((....))))....	((((..........))))............	0.004,0.0,0.056,0.075,0.097,0.055,0.0,0.0,0.056,0.0,0.0,0.0,0.0,0.032,0.068,0.0,0.042,0.028,0.123,0.062,0.555,0.135,0.0,0.131,0.277,0.4,0.977,0.145,0.209,0.24	0.0,0.0,0.0,0.006,0.191,0.011,0.029,0.0,0.035,0.015,0.063,0.038,0.0,0.06,0.178,0.0,0.024,0.18,0.067,0.0,0.66,0.314,0.0,0.3,0.324,0.347,1.0,0.193,0.502,0.603
NM_200099.696_726	...((....))((((...))))........	.((((......))))...............	0.096,0.143,0.401,0.049,0.152,0.0,0.233,0.109,0.108,0.0,0.094,0.174,0.098,0.2,0.158,0.41,1.0,0.122,0.168,0.385,0.089,0.156,0.085,0.062,0.063,0.125,0.327,0.487,0.251,0.291	0.082,0.162,0.249,0.02,0.2,0.0,0.221,0.113,0.121,0.01,0.121,0.166,0.099,0.078,0.14,0.341,0.816,0.142,0.178,0.507,0.073,0.066,0.087,0.115,0.071,0.172,0.232,0.317,0.085,0.226
NM_200099.880_910	.((.((....)).)).(((((....)))))	...(((..((((......))))....))).	0.531,0.456,0.52,0.215,0.509,0.0,0.474,0.447,0.224,0.307,0.131,0.21,0.206,0.071,0.135,0.188,0.776,0.551,0.0,0.0,0.0,0.054,0.097,0.755,0.254,0.108,0.278,0.271,0.699,0.25	1.0,0.85,0.491,0.082,0.832,0.0,0.379,0.64,0.374,0.204,0.113,0.346,0.251,0.165,0.168,0.189,1.0,0.554,0.035,0.039,0.015,0.0,0.225,1.0,0.584,0.146,0.21,0.425,1.0,0.421
NM_200103.2034_2064	....(((........))).((....))...	(((((.(((.((......)).))).)))))	0.541,0.551,0.3,0.289,0.674,0.088,0.507,0.469,0.67,0.261,0.306,0.285,0.492,0.399,0.389,0.167,0.183,0.525,1.0,0.192,0.465,0.226,0.166,0.272,0.453,0.394,0.255,0.267,0.292,0.326	0.37,0.431,0.285,0.127,0.613,0.0,0.645,0.332,0.5,0.394,0.22,0.163,0.42,0.265,0.383,0.093,0.153,0.666,1.0,0.124,0.49,0.078,0.108,0.222,0.492,0.194,0.193,0.193,0.199,0.265
NM_200123.1349_1379	(((((((......)).)))))(((...)))	(((((((......)).))))).........	0.228,0.471,0.797,0.214,0.418,0.027,0.002,0.0,0.0,0.181,0.387,0.102,0.447,0.0,0.541,0.05,0.239,0.048,0.0,0.145,0.0,0.084,0.0,0.029,0.0,0.0,0.0,0.0,0.0,0.106	0.358,0.165,0.182,0.145,0.128,0.176,0.0,0.0,0.0,0.236,0.294,0.576,0.555,0.0,0.168,0.038,0.0,0.134,0.106,0.004,0.0,0.157,0.513,0.059,0.0,0.032,0.0,0.109,0.256,0.148
NM_200241.1468_1498	...((.........)).(((((...)))))	.((((.........))))((((...)))).	0.491,0.989,0.279,0.0,0.008,0.001,0.0,0.05,0.327,0.0,0.179,0.749,0.477,0.232,0.193,0.606,0.183,0.304,0.139,0.358,0.055,0.316,1.0,0.688,1.0,0.432,0.34,0.075,0.025,0.068	0.397,0.666,0.171,0.047,0.0,0.0,0.0,0.0,0.033,0.0,0.264,0.623,0.648,0.174,0.2,0.279,0.053,0.133,0.284,0.476,0.0,0.194,1.0,0.294,1.0,0.418,0.239,0.0,0.288,0.0
NM_200272.1029_1059	.(((((((..((((...)))).))).))))	.(((((...((((.......)))).)))))	0.211,0.0,0.226,0.0,0.077,0.066,0.167,0.33,0.289,0.187,0.195,0.332,0.254,0.052,0.273,0.46,0.588,0.157,0.015,0.086,0.0,0.091,0.045,0.106,0.0,0.136,0.014,0.0,0.181,0.035	0.0,0.165,0.146,0.138,0.367,0.0,0.293,0.433,0.0,0.01,0.189,0.151,0.083,0.012,0.301,0.198,0.254,0.0,0.13,0.0,0.0,0.0,0.0,0.0,0.129,0.0,0.028,0.012,0.131,0.0
NM_200388.861_891	...((......................)).	...((..(((.........))).....)).	1.0,0.462,0.515,0.052,0.195,0.018,0.201,0.189,0.255,0.574,0.354,0.015,0.435,0.162,0.086,0.389,0.549,0.377,0.756,0.289,1.0,0.158,0.373,0.566,0.542,0.649,0.621,0.282,0.29,0.071	0.804,0.375,0.043,0.047,0.089,0.0,0.163,0.033,0.0,0.171,0.118,0.148,0.121,0.053,0.171,0.624,0.095,0.114,0.342,0.196,0.801,0.215,0.542,0.404,0.465,0.489,0.454,0.0,0.007,0.078
NM_200442.2389_2419	...................(((.....)))	(((((....))))).....(((.....)))	0.286,0.326,0.235,0.124,0.375,0.0,0.129,0.1,0.768,0.42,0.886,0.621,0.604,0.968,1.0,0.965,0.066,0.271,0.373,0.147,0.188,0.123,0.15,0.104,0.201,0.212,0.322,0.029,0.053,0.06	0.0,0.191,0.137,0.104,0.314,0.0,0.264,0.16,0.678,0.42,0.681,0.388,0.714,0.649,1.0,0.621,0.136,0.256,0.127,0.134,0.0,0.112,0.259,0.118,0.221,0.075,0.051,0.089,0.086,0.0
NM_200459.949_979	(((.....)))((((((......)))))).	...((....))((((((......)))))).	0.28,0.271,0.384,0.334,0.583,0.0,0.184,0.139,0.204,0.0,0.035,0.164,0.267,0.521,0.299,0.686,0.67,0.378,0.329,0.074,0.188,0.0,0.453,0.607,0.361,0.196,0.305,0.41,0.124,0.283	0.509,0.644,0.084,0.3,0.313,0.0,0.146,0.0,0.413,0.0,0.0,0.104,0.225,0.329,0.0,0.532,0.086,0.144,0.3,0.034,0.592,0.0,0.082,0.303,0.199,0.314,0.035,0.134,-1,-1
NM_200467.1150_1180	......(((.(((((...))))).)))...	..((..(((.(((((...))))).))).))	0.357,0.515,0.353,0.272,0.41,0.0,0.268,0.297,0.265,1.0,0.493,0.425,0.183,0.209,0.087,0.0,0.05,0.064,0.0,0.034,0.118,0.225,0.371,0.113,0.109,0.227,0.394,0.054,0.041,0.136	0.316,0.377,0.17,0.179,0.512,0.0,0.112,0.141,0.196,0.869,0.446,0.501,0.151,0.088,0.139,0.018,0.023,0.0,0.0,0.0,0.038,0.147,0.316,0.086,0.059,0.164,0.461,0.02,0.0,0.071
NM_200511.1112_1142	..(((....)))..................	.........(((........))).......	0.533,-1,-1,-1,-1,0.095,0.255,0.21,0.109,0.0,0.055,0.014,0.192,0.196,0.569,0.054,0.036,0.208,0.0,0.0,0.254,0.105,0.233,0.0,0.609,0.702,0.554,0.323,0.467,0.199	0.017,0.0,0.0,0.069,0.055,0.113,0.741,0.172,0.249,0.0,0.125,0.065,0.074,0.052,0.335,0.061,0.15,0.366,0.163,0.188,0.022,0.054,0.224,0.039,0.551,0.397,0.141,0.118,0.295,0.098
NM_200522.5425_5455	....(((.....)))...............	((.((.(((...))).)).)).........	0.315,0.54,0.485,0.121,0.084,0.049,0.049,0.249,0.307,0.761,1.0,0.865,0.49,0.264,0.292,0.175,0.52,1.0,0.358,0.075,0.143,0.07,0.059,0.077,0.42,0.167,1.0,0.415,0.331,0.1	0.16,0.291,0.189,0.0,0.158,0.0,0.039,0.08,0.389,0.439,0.712,0.626,0.34,0.169,0.12,0.215,0.444,1.0,0.26,0.104,0.152,0.102,0.027,0.057,0.495,0.157,1.0,0.398,0.272,0.115
NM_200632.1707_1737	...((((((...((...))...))))))..	...(((((.............)))))....	0.222,0.207,0.088,0.09,0.454,1.0,0.549,1.0,0.55,0.601,0.217,0.297,0.144,0.465,0.415,0.183,0.078,0.202,0.207,0.099,0.151,0.052,0.043,0.061,0.045,0.206,0.19,0.24,0.234,0.381	0.117,0.074,0.108,0.061,0.309,1.0,0.45,1.0,0.261,0.48,0.287,0.313,0.127,0.543,0.38,0.425,0.0,0.595,0.26,0.118,0.258,0.022,0.022,0.087,0.072,0.322,0.345,0.493,0.596,0.333
NM_200650.2221_2251	...((.((((((........))))))))..	((.((.((((((........))))))))))	0.186,0.207,0.856,0.159,0.27,0.838,0.083,0.024,0.165,0.103,0.126,0.217,0.218,0.282,1.0,0.891,0.621,0.797,0.448,1.0,1.0,0.548,0.181,0.112,0.074,0.1,0.019,0.074,0.108,0.212	0.079,0.161,0.668,0.08,0.25,0.575,0.024,0.008,0.097,0.041,0.089,0.089,0.119,0.124,1.0,0.766,0.327,0.592,0.324,0.905,1.0,0.654,0.082,0.057,0.009,0.098,0.021,0.055,0.021,0.237
NM_200682.1749_1779	...............((.......))....	...........(((.((.......)).)))	0.226,0.331,0.241,0.214,0.337,0.045,0.221,0.173,0.378,0.19,0.778,1.0,0.632,0.264,0.958,0.063,0.06,0.278,0.334,0.681,0.391,0.0,0.277,0.0,0.0,0.353,0.225,0.275,0.486,0.169	0.0,0.002,0.386,0.012,0.0,0.045,0.037,0.0,0.407,0.122,0.972,0.72,0.133,0.033,0.313,0.0,0.049,0.0,0.083,0.619,0.254,0.154,0.082,0.168,0.009,0.094,0.0,0.524,0.101,0.054
NM_200896.827_857	.(((......)))..(((.........)))	((((((..........)))..)))......	0.193,0.118,0.186,0.167,0.244,0.056,0.047,0.385,0.635,0.134,0.304,0.217,0.058,0.005,0.0,0.0,0.197,0.024,0.097,0.028,0.192,0.104,0.284,0.316,0.98,0.632,0.197,0.069,0.054,0.074	0.055,0.081,0.17,0.015,0.089,0.0,0.024,0.357,0.641,0.095,0.266,0.093,0.009,0.0,0.0,0.0,0.055,0.04,0.027,0.0,0.101,0.032,0.146,0.122,1.0,0.609,0.037,0.15,0.054,0.072
NM_200927.2590_2620	(((((....................)))))	(((((.....((.(((...))))).)))))	0.344,0.467,0.429,0.014,0.255,0.236,0.261,0.724,0.818,1.0,0.177,0.743,0.492,0.821,0.228,0.313,0.805,0.385,0.392,0.16,0.537,0.254,0.392,0.261,0.205,0.155,0.336,0.415,0.3,0.722	0.0,0.29,0.126,0.0,0.08,0.0,0.213,0.468,0.292,0.243,0.283,1.0,0.411,0.315,0.053,0.224,0.108,0.142,0.446,0.368,0.27,0.036,0.0,0.073,0.26,0.037,0.068,0.278,0.343,0.454
NM_200959.854_884	.(((...)))....................	((((...((............))..)))).	0.349,0.334,0.594,0.101,0.659,0.266,0.007,0.277,0.002,0.076,0.052,0.0,0.108,0.141,1.0,0.365,0.684,0.0,0.991,1.0,1.0,1.0,0.0,0.124,0.24,0.358,0.0,0.539,0.259,0.215	0.119,0.209,0.343,0.113,0.373,0.134,0.0,0.171,0.0,0.0,0.0,0.0,0.0,0.114,0.646,0.097,0.35,0.0,0.551,0.922,0.612,0.226,0.0,0.0,0.0,0.141,0.018,0.029,0.067,0.118
NM_201085.2543_2573	.....(((((..((...))....))).)).	..........((((.......)))).....	0.391,0.341,0.309,0.217,0.526,0.139,0.121,0.289,0.102,0.17,0.098,0.095,0.267,0.334,0.871,1.0,0.319,0.024,0.873,0.873,0.407,0.453,0.424,1.0,1.0,0.004,0.16,0.367,0.161,0.311	0.252,0.24,0.338,0.205,0.45,0.187,0.084,0.306,0.056,0.123,0.056,0.0,0.095,0.418,0.815,1.0,0.225,0.009,0.706,0.783,0.438,0.344,0.174,1.0,1.0,0.045,0.071,0.539,0.003,0.159
NM_201157.1565_1595	((((....))))(((.....))).......	((((....))))..((((.......)))).	0.0,0.158,0.003,0.044,0.076,0.0,0.161,0.0,0.0,0.097,0.072,0.409,0.173,0.101,0.186,0.002,0.074,0.0,0.202,0.042,0.228,0.245,0.737,0.594,0.338,0.249,0.485,0.332,0.483,0.52	0.0,0.041,0.0,0.0,0.0,0.0,0.028,0.0,0.0,0.029,0.06,0.0,0.0,0.0,0.0,0.0,0.0,0.0,0.031,0.154,0.306,0.378,0.77,0.618,0.031,0.117,0.415,0.046,0.475,0.66
NM_201215.1221_1251	....(((...)))((((....)))).....	....((((.......)))).(((....)))	1.0,1.0,0.423,0.204,0.063,0.0,0.223,0.248,0.294,0.077,0.093,0.0,0.154,0.196,0.002,0.168,0.286,0.206,0.173,0.031,0.261,0.0,0.208,0.257,0.009,0.0,0.0,0.0,0.046,0.002	1.0,0.749,0.223,0.016,0.0,0.0,0.051,0.016,0.264,0.106,0.22,0.078,0.231,0.017,0.0,0.18,0.145,0.119,0.122,0.024,0.075,0.066,0.441,0.269,0.0,0.0,0.0,0.027,0.0,0.111
NM_201292.1810_1840	..(((((....((......))....)))))	..(((((...(((.......)))..)))))	0.565,0.4,0.46,0.123,0.585,0.325,0.385,0.685,0.773,0.494,0.163,0.402,0.145,0.064,0.258,0.241,0.274,0.556,0.142,0.095,0.142,0.172,0.264,0.233,0.308,0.335,0.046,0.157,0.093,0.312	0.66,0.334,0.132,0.0,0.464,0.0,0.562,0.64,0.213,0.156,0.008,0.032,0.016,0.0,0.328,0.031,0.368,0.077,0.004,0.027,0.015,0.228,0.322,0.043,0.347,0.197,0.0,0.104,0.066,0.604
NM_201466.1570_1600	....(((.................)))...	..........(((.........))).....	1.0,0.659,0.338,0.0,0.243,0.0,0.0,0.183,1.0,0.323,0.12,0.196,0.052,0.0,0.0,0.0,0.856,0.951,0.608,0.058,0.0,0.004,0.115,0.277,0.022,0.108,0.206,0.302,0.179,0.966	0.927,0.423,0.263,0.0,0.177,0.034,0.003,0.079,1.0,0.263,0.0,0.059,0.0,0.0,0.0,0.0,0.453,0.632,0.539,0.016,0.0,0.0,0.044,0.097,0.017,0.093,0.429,0.456,0.103,0.386
NM_201471.1617_1647	....(((..((...))....))).......	....(((...((...))...))).......	0.281,0.158,0.765,0.228,0.218,0.019,0.112,0.016,0.0,0.097,0.372,0.585,0.187,0.03,0.0,0.0,0.081,0.429,0.211,0.214,0.102,0.152,0.933,0.242,0.002,0.048,0.022,0.498,0.095,0.0	0.112,0.062,0.439,0.154,0.206,0.068,0.048,0.0,0.0,0.06,0.135,0.523,0.14,0.0,0.062,0.078,0.104,0.283,0.08,0.186,0.035,0.083,1.0,0.323,0.013,0.06,0.055,0.374,0.016,0.0
NM_201476.2009_2039	.....(((..(((((....)))))..))).	.((((((...))).))).............	0.005,0.112,0.424,0.132,0.238,0.015,0.375,0.291,0.222,0.031,0.089,0.602,0.0,0.139,0.279,0.641,0.152,0.16,0.16,0.021,0.006,0.503,0.537,1.0,1.0,0.658,0.501,0.765,0.693,1.0	0.0,0.0,0.0,0.011,0.463,0.049,0.185,0.249,0.093,0.0,0.035,0.165,0.0,0.088,0.261,0.234,0.124,0.0,0.044,0.118,0.01,0.545,0.621,0.891,1.0,0.589,0.436,0.655,0.222,0.981
NM_201500.1891_1921	..........((((...)))).........	.(((......((((...))))...)))...	0.546,0.591,0.663,0.143,0.217,0.145,0.556,0.601,0.76,0.137,0.0,0.062,0.077,0.183,0.083,0.19,0.094,0.205,0.115,0.07,0.263,0.218,0.656,0.801,0.594,0.081,0.164,0.204,0.093,0.196	0.336,0.39,0.47,0.147,0.244,0.0,0.359,0.622,0.781,0.1,0.0,0.163,0.143,0.158,0.037,0.198,0.091,0.128,0.016,0.008,0.275,0.242,0.571,0.513,0.462,0.111,0.077,0.19,0.105,0.211
NM_205538.1326_1356	..((((....))))..(((........)))	.((((((....))....)))).........	0.446,0.171,0.389,0.069,0.208,0.073,0.177,0.988,0.799,0.56,0.53,0.481,0.612,0.851,0.167,0.0,0.132,0.129,0.324,0.336,0.63,0.509,1.0,0.585,1.0,0.86,1.0,0.236,0.0,0.038	0.151,0.018,0.094,0.062,0.0,0.012,0.269,0.921,0.564,0.316,0.5,0.205,0.618,0.829,0.22,0.006,0.24,0.104,0.185,0.161,0.477,0.391,0.897,0.479,1.0,0.87,1.0,0.222,0.0,0.021
NM_205716.2311_2341	..............................	.(((........)))...............	0.0,0.087,0.171,0.05,0.326,0.012,0.0,0.0,0.0,0.185,0.067,0.077,0.354,0.427,0.649,1.0,0.537,0.303,0.466,0.744,0.444,0.359,0.084,0.709,0.118,0.74,0.228,0.174,0.168,0.329	0.0,0.037,0.0,0.032,0.287,0.0,0.0,0.089,0.016,0.165,0.076,0.021,0.0,0.227,0.476,1.0,0.446,0.167,0.39,0.739,0.604,0.18,0.042,0.514,0.275,0.63,0.068,0.153,0.173,0.211
NM_205719.1190_1220	...(((.......))).(((......))).	...(((.......)))((((......))))	0.384,0.155,0.226,0.068,0.12,0.119,0.384,0.369,0.0,0.474,0.242,0.689,0.89,0.733,0.154,0.256,0.269,0.362,0.0,0.404,0.593,0.133,0.196,0.0,0.058,0.099,0.184,0.0,0.081,0.425	0.246,0.149,0.165,0.214,0.334,0.126,0.393,0.054,0.0,0.056,0.189,0.521,0.386,0.653,0.081,0.161,0.132,0.259,0.072,0.282,0.739,0.094,0.267,0.0,0.042,0.0,0.087,0.155,0.158,0.146
NM_212585.1390_1420	..((((((((.....))))....))))...	..((((((((......))))...))))...	0.083,0.257,0.387,0.082,0.415,0.44,0.244,0.509,0.919,0.739,0.156,0.745,0.528,0.377,0.159,0.303,0.037,0.033,0.142,0.812,0.132,0.277,0.314,0.525,0.103,0.112,0.069,0.802,0.063,0.249	0.037,0.231,0.183,0.023,0.192,0.0,0.145,0.397,0.612,0.487,0.186,0.605,0.599,0.469,0.166,0.3,0.038,0.0,0.146,0.448,0.123,0.446,0.038,0.053,0.037,0.0,0.135,0.745,0.153,0.158
NM_212590.1585_1615	..............................	((....))......................	0.028,0.0,0.127,0.05,0.062,0.078,0.0,0.107,0.0,0.0,0.0,0.079,0.028,0.006,0.064,0.089,0.09,0.271,0.47,0.982,0.372,0.345,0.247,0.555,0.656,0.681,-1,-1,-1,-1	0.069,0.0,0.0,0.0,0.0,0.053,0.0,0.0,0.106,0.0,0.0,0.126,0.0,0.0,0.202,0.0,0.262,0.23,0.079,0.718,0.199,0.0,0.75,0.753,0.534,0.249,0.912,0.303,0.142,-1
NM_212602.1175_1205	((((((((...)))....)).)))......	(((((.............)).)))......	0.118,0.376,0.454,0.108,0.374,0.02,0.154,0.09,0.17,0.795,0.472,0.44,0.425,0.582,0.832,0.192,0.353,0.379,0.146,0.241,0.512,0.17,0.314,0.22,0.145,0.147,0.459,0.268,0.379,1.0	0.151,0.493,0.577,0.254,0.79,0.087,0.384,0.14,0.067,0.955,0.51,0.43,0.709,0.321,0.697,0.264,0.154,0.322,0.142,0.159,0.878,0.118,0.327,0.218,0.433,0.115,0.643,0.313,0.927,1.0
NM_212615.1345_1375	.....((((...((.......))...))))	........(((((............)))))	0.856,0.899,0.556,0.188,0.387,0.061,0.092,0.231,0.002,0.205,0.267,0.189,0.25,0.002,0.0,0.0,0.035,0.087,0.546,0.167,0.0,0.0,0.139,0.745,0.502,0.438,0.303,0.475,0.18,0.176	0.835,0.686,0.369,0.117,0.419,0.024,0.019,0.245,0.012,0.02,0.142,0.313,0.103,0.019,0.0,0.0,0.029,0.078,0.592,0.0,0.0,0.017,0.02,1.0,0.649,0.373,0.192,0.336,0.121,0.133
NM_212636.1247_1277	.....(((....)))...............	..(((........)))..............	0.389,0.481,0.279,0.08,0.372,0.183,0.073,0.534,0.199,0.381,0.0,0.0,0.457,0.051,0.955,0.088,0.717,0.408,0.212,0.345,0.193,0.265,1.0,0.25,0.165,0.179,0.0,0.068,0.032,0.177	0.114,0.223,0.193,0.101,0.233,0.0,0.229,0.402,0.03,0.39,0.0,0.105,0.506,0.173,0.664,0.119,0.799,0.598,0.15,0.306,0.208,0.355,1.0,0.147,0.712,0.163,0.106,0.106,0.033,0.173
NM_212660.2665_2695	..........(((........)))......	.......((.(((........)))))....	0.467,0.555,0.596,0.27,0.833,0.202,0.965,1.0,0.087,0.193,0.06,0.068,0.263,0.483,0.159,0.506,0.923,0.562,0.044,0.074,0.234,0.099,0.159,0.224,0.62,0.304,0.752,1.0,0.392,0.357	0.272,0.243,0.282,0.225,0.538,0.09,0.812,0.567,0.074,0.051,0.002,0.091,0.227,0.295,0.041,0.389,0.25,0.397,0.05,0.041,0.064,0.019,0.067,0.233,0.309,0.171,0.477,0.786,0.204,0.253
NM_212857.840_870	........((((((.....)))))).....	.........(((((.....)))))......	0.0,0.022,0.087,0.079,0.009,0.046,0.168,0.339,0.752,0.347,0.18,0.13,0.304,0.037,0.449,0.123,0.02,0.048,0.386,0.313,0.0,0.604,0.378,0.46,0.08,0.232,0.305,0.441,0.292,0.097	0.071,0.0,0.001,0.0,0.196,0.0,0.203,0.438,1.0,0.19,0.128,0.064,0.013,0.077,0.3,0.0,0.0,0.359,0.214,0.588,0.0,0.57,0.317,0.661,0.405,0.013,0.548,0.858,0.221,0.127
NM_212885.1094_1124	......(((................)))..	(((...((.(((....)))..)).)))...	0.229,0.428,0.323,0.228,0.633,0.297,0.0,0.612,0.441,0.508,0.222,0.494,0.291,0.118,0.1,0.681,0.691,0.61,0.706,0.542,0.059,0.086,0.485,0.357,0.281,0.0,0.094,0.021,0.37,0.194	0.21,0.12,0.296,0.139,0.733,0.474,0.181,0.303,0.123,0.261,0.181,0.181,0.071,0.123,0.052,0.483,0.553,0.23,0.661,0.4,0.0,0.0,0.607,0.308,0.194,0.093,0.239,0.159,0.345,0.352
NM_212915.2043_2073	..(((((........(((....))))))))	(((((.((((....)))).)))))......	0.469,0.351,0.317,0.08,0.34,0.056,0.163,0.156,0.307,0.244,0.339,0.87,0.805,0.269,0.085,0.061,0.136,0.13,0.383,0.347,0.334,0.443,0.148,0.128,0.161,0.0,0.095,0.079,0.056,0.084	0.333,0.2,0.163,0.141,0.47,0.082,0.331,0.303,0.276,0.282,0.071,1.0,1.0,0.334,0.108,0.049,0.037,0.147,0.286,0.381,0.133,0.474,0.0,0.099,0.399,0.092,0.174,0.116,0.096,0.152
NM_213062.3640_3670	.(((...((........)).....)))...	((((((......))..))))..........	0.194,0.317,0.36,0.21,0.632,0.216,0.053,0.231,0.268,0.085,0.101,0.237,0.092,0.329,0.253,0.119,0.304,0.344,0.115,0.099,0.179,0.359,0.016,0.018,0.041,0.165,0.421,0.943,0.822,0.37	0.047,0.11,0.107,0.015,0.369,0.184,0.0,0.324,0.16,0.007,0.09,0.152,0.0,0.322,0.141,0.153,0.128,0.111,0.02,0.072,0.112,0.232,0.008,0.018,0.044,0.101,0.372,0.975,0.733,0.339
NM_213073.2494_2524	..........(((((((....)).))))).	((((...))))...((((......))))..	0.708,0.703,0.856,0.253,0.43,0.087,0.124,0.008,0.115,0.133,0.087,0.304,0.102,0.0,0.061,0.015,0.006,0.023,0.083,0.139,0.125,0.128,0.165,0.212,0.336,0.403,0.342,0.319,0.717,0.325	0.338,0.508,0.419,0.153,0.487,0.159,0.163,0.055,0.055,0.174,0.11,0.46,0.128,0.072,0.102,0.035,0.0,0.094,0.109,0.114,0.296,0.078,0.126,0.286,0.292,0.516,0.539,0.409,0.905,0.394
NM_213077.2722_2752	..............((((....))))....	.((......))...((((....))))....	0.32,0.495,0.259,0.151,0.557,0.062,0.557,1.0,0.817,0.563,1.0,0.607,0.249,0.193,0.152,0.068,0.022,0.037,0.0,0.074,0.109,0.067,0.079,0.027,0.127,0.0,0.077,0.234,0.365,0.439	0.049,0.128,0.121,0.057,0.524,0.034,0.266,1.0,0.37,0.089,0.584,0.652,0.086,0.074,0.131,0.0,0.024,0.009,0.0,0.027,0.106,0.06,0.029,0.037,0.116,0.0,0.08,0.397,0.278,0.356
NM_213148.660_690	...(((..............))).......	.(((...............)))((....))	0.057,0.123,0.147,0.043,0.395,0.15,0.621,0.34,0.257,0.203,0.467,0.194,0.0,0.0,0.0,0.0,0.0,0.124,0.0,0.251,0.185,0.061,0.17,0.354,0.035,0.472,1.0,0.0,0.102,0.219	0.02,0.0,0.0,0.019,0.122,0.103,0.333,0.055,0.245,0.23,0.069,0.0,0.0,0.0,0.0,0.0,0.0,0.004,0.0,0.034,0.0,0.0,0.068,0.0,0.0,0.248,1.0,0.0,0.0,0.149
NM_213224.2253_2283	.((.....))....(((.....))).....	.((.....))....................	0.135,0.169,0.222,0.114,0.268,0.119,0.053,0.587,0.116,0.319,0.171,0.324,0.59,0.095,0.878,0.756,1.0,0.135,0.0,0.027,-1,-1,-1,-1,-1,-1,-1,-1,-1,-1	0.066,0.033,0.144,0.0,0.282,0.0,0.322,0.635,0.0,0.124,0.185,0.196,0.354,0.035,0.745,0.424,1.0,0.259,0.27,0.102,0.0,0.056,0.374,0.04,0.07,0.0,0.759,0.315,0.149,0.0
NM_213368.1124_1154	......(((((...)))))...........	.((((.(((((...)))))...))))....	0.011,1.0,0.766,0.58,1.0,0.66,0.297,0.435,1.0,0.544,0.361,0.419,0.0,0.07,0.123,0.0,0.041,0.154,0.227,0.094,0.0,0.189,0.28,0.193,0.369,0.284,0.976,1.0,0.496,0.203	0.087,0.402,0.294,0.282,0.601,0.429,0.249,0.123,1.0,0.588,0.056,0.187,0.009,0.071,0.189,0.011,0.0,0.0,0.341,0.0,0.009,0.105,0.25,0.251,0.176,0.103,1.0,0.785,0.222,0.207
NM_213371.2614_2644	...(((....)))...(((....)))....	...((((..........)))).........	0.993,1.0,1.0,0.073,0.065,0.0,0.149,0.0,0.123,0.0,0.322,0.231,0.192,0.752,0.275,0.547,0.0,0.102,0.396,0.28,0.55,0.363,0.479,0.0,0.101,0.407,1.0,1.0,1.0,0.741	1.0,1.0,1.0,0.207,0.0,0.149,0.0,0.015,0.078,0.0,0.153,0.189,0.071,0.241,0.162,0.156,0.0,0.0,0.087,0.184,0.155,0.15,0.082,0.094,0.0,0.514,0.715,0.746,1.0,0.164
NM_213424.3019_3049	..(((.........((((....))))))).	....((.....)).((((....))))....	0.341,0.132,0.168,0.099,0.06,0.0,0.203,0.287,0.491,1.0,0.432,0.189,0.313,0.073,0.088,0.073,0.407,0.192,0.051,0.953,0.412,0.182,0.0,0.0,0.0,0.044,0.107,0.161,0.016,0.0	0.349,0.269,0.166,0.104,0.296,0.0,0.203,0.344,0.467,1.0,0.458,0.124,0.325,0.025,0.081,0.088,0.301,0.119,0.0,1.0,0.557,0.244,0.0,0.0,0.005,0.018,0.181,0.384,0.0,0.005
NM_213446.1957_1987	...............(((((....))))).	.(((........))).((((....))))..	0.195,0.47,0.655,0.334,0.392,0.023,0.538,0.358,0.142,0.118,0.546,0.303,0.259,0.161,0.094,0.598,0.161,0.096,-1,-1,-1,-1,-1,-1,-1,-1,-1,-1,-1,-1	0.099,0.202,0.314,0.105,0.312,0.0,0.281,0.148,0.06,0.075,0.389,0.204,0.173,0.0,0.022,0.383,0.067,0.0,-1,-1,-1,-1,-1,-1,-1,-1,-1,-1,-1,-1
NM_213457.1207_1237	..(((.((...............)))))..	..((.((((..............)))).))	0.114,0.304,0.0,0.0,0.028,0.0,0.153,0.755,0.233,1.0,1.0,1.0,0.53,0.568,0.553,0.589,0.461,0.661,0.474,1.0,1.0,0.529,0.013,0.022,0.051,0.0,0.0,0.036,0.0,0.132	0.081,0.027,0.007,0.005,0.0,0.0,0.042,0.459,0.049,0.587,0.707,1.0,0.369,0.554,0.517,0.165,0.558,0.355,0.28,1.0,1.0,0.446,0.027,0.0,0.0,0.015,0.03,0.054,0.0,0.107
NM_213479.962_992	....((((((......)).)))).......	....((((((......)).))))((...))	0.455,0.386,0.334,0.209,0.229,0.161,0.134,0.294,0.755,0.516,0.443,0.66,1.0,1.0,0.14,0.247,0.112,0.097,0.074,0.033,0.025,0.022,0.018,0.008,0.137,1.0,0.159,0.105,0.302,0.039	0.324,0.346,0.207,0.131,0.175,0.043,0.031,0.123,0.699,0.335,0.21,0.408,1.0,1.0,0.15,0.368,0.071,0.109,0.08,0.048,0.011,0.006,0.051,0.027,0.007,1.0,0.098,0.043,0.113,0.043
NM_213481.1550_1580	.(((((.....)))))..............	((((((.....)))))).............	0.195,0.311,0.528,0.102,0.426,0.101,0.345,1.0,0.737,0.631,0.42,0.679,0.729,0.481,0.548,0.861,1.0,1.0,0.531,1.0,0.299,0.248,0.146,0.285,0.284,0.536,0.637,0.994,1.0,0.507	0.096,0.221,0.247,0.088,0.545,0.062,0.287,1.0,0.819,0.313,0.186,0.565,0.638,0.254,0.528,0.387,1.0,1.0,0.292,0.967,0.085,0.16,0.032,0.177,0.13,0.285,0.503,0.584,1.0,0.493
NM_213529.1473_1503	.(((...(((........))).))).....	.(((...(((.....)))....))).....	0.224,0.213,0.025,0.125,0.167,0.0,0.0,0.37,0.097,0.211,0.292,0.068,0.048,0.169,0.534,0.04,0.028,0.059,0.192,0.099,0.179,0.006,0.09,0.178,0.606,0.336,0.238,0.446,0.118,0.152	0.249,0.179,0.135,0.047,0.331,0.048,0.045,0.396,0.056,0.104,0.227,0.025,0.0,0.027,0.386,0.331,0.0,0.13,0.136,0.22,0.442,0.0,0.007,0.132,0.385,0.268,0.081,0.686,0.154,0.26
NM_213530.983_1013	((...(((((......))))).))......	..((((((((......)))))..)))....	0.0,0.1,0.179,0.065,0.351,0.052,0.266,0.249,0.053,0.122,0.675,0.112,0.274,0.531,0.526,0.669,0.724,0.216,0.306,0.38,0.264,0.103,0.257,0.315,0.135,0.679,0.144,0.198,0.0,0.079	0.039,0.022,0.153,0.0,0.332,0.04,0.216,0.214,0.001,0.067,0.318,0.0,0.315,0.684,0.25,0.204,0.903,0.282,0.408,0.599,0.109,0.01,0.585,0.257,0.079,0.669,0.151,0.108,0.01,0.062
NM_213538.1219_1249	...((..((.((......)).))..))...	(((((...((...))...))))).......	0.767,0.257,0.626,0.143,1.0,0.386,0.279,0.28,0.209,0.637,0.802,0.183,0.23,0.432,0.305,0.301,0.269,0.04,0.241,0.347,0.237,0.169,0.109,0.043,0.24,0.039,0.125,0.0,0.0,0.054	0.312,0.255,0.159,0.01,0.513,0.246,0.068,0.104,0.201,0.403,0.783,0.0,0.0,0.0,0.048,0.005,0.071,0.065,0.0,0.099,0.111,0.035,0.146,0.011,0.028,0.023,0.0,0.0,0.0,0.273

## Sheet: cell64_sphere
transcript.start_end	dot(cell64)	dot(sphere)	shape(cell64)	shape(sphere)
NM_001001943.3092_3122	((.((((.((....))))))..))......	...(((((.......)))))..........	0.614,1.0,0.081,0.12,0.019,0.0,0.0,0.355,0.107,0.089,1.0,0.775,0.052,0.079,0.104,0.039,0.041,0.091,0.0,0.0,0.045,0.291,0.057,0.119,0.071,0.312,1.0,0.122,0.334,0.04	0.896,1.0,0.209,0.191,0.0,0.0,0.077,0.458,0.416,0.196,0.84,0.951,0.658,0.22,0.137,0.091,0.055,0.42,0.018,0.066,0.04,0.206,0.136,0.175,0.243,0.42,1.0,0.345,0.137,0.087
NM_001001951.1532_1562	...(((........))).............	..............................	0.767,0.563,0.5,0.024,0.218,0.103,0.012,0.0,0.012,0.0,0.0,0.0,0.507,0.28,0.375,0.768,0.565,0.381,1.0,1.0,0.263,1.0,1.0,0.0,0.0,0.0,0.0,0.0,0.0,0.0	0.803,0.592,0.627,0.172,0.166,0.24,0.019,0.034,0.0,0.077,0.0,0.191,0.021,0.057,0.692,1.0,0.808,0.314,0.932,1.0,0.593,1.0,0.401,0.033,0.0,0.0,0.0,0.0,0.018,0.0
NM_001002099.1051_1081	((.((((..............)).)).)).	....................(((...))).	0.172,0.646,0.634,0.311,0.918,0.09,0.202,0.407,0.781,1.0,0.357,0.165,0.564,0.305,0.141,1.0,0.007,0.943,1.0,1.0,0.623,0.139,0.0,0.05,0.0,0.009,0.0,0.0,0.0,0.012	0.423,0.734,1.0,0.636,0.884,0.358,0.35,0.66,1.0,1.0,0.67,0.574,0.906,0.541,0.315,0.954,0.008,0.853,1.0,1.0,1.0,0.089,0.0,0.06,0.03,0.045,0.0,0.0,0.0,0.0
NM_001002228.3202_3232	........(((...((....)).....)))	.......(((....)))...((......))	0.593,0.319,0.184,0.19,0.457,0.083,0.242,0.078,0.166,0.08,0.697,0.0,0.024,0.024,0.0,0.294,0.506,1.0,0.135,0.006,0.0,0.0,0.0,0.007,0.01,0.0,0.359,0.065,0.0,0.026	0.997,0.873,0.665,0.52,0.314,0.388,0.148,0.184,0.094,0.165,0.418,0.129,0.052,0.087,0.0,0.039,0.648,1.0,0.221,0.204,0.032,0.0,0.041,0.0,0.0,0.032,0.223,0.18,0.124,0.163
NM_001002330.2208_2238	.............((((((...))))))..	.((((((((.......)))).)).))....	0.183,0.317,0.029,0.073,0.603,0.04,0.309,0.308,0.93,0.21,0.332,0.276,0.464,0.291,0.555,0.351,0.052,0.099,0.01,0.016,0.264,0.0,0.038,0.079,0.171,0.021,0.088,0.154,0.079,0.293	0.182,0.647,0.482,0.142,0.204,0.215,0.0,0.25,0.395,0.683,0.874,0.89,0.482,0.443,0.971,0.305,0.209,0.319,0.0,0.0,0.186,0.053,0.0,0.043,0.088,0.0,0.752,0.259,0.095,0.449
NM_001002480.660_690	.(((.((.....)).)))............	............((((........))))..	0.039,0.355,0.125,0.0,0.0,0.06,0.006,0.052,0.0,0.277,0.042,0.018,0.103,0.019,0.0,0.0,0.0,0.1,0.0,0.151,0.206,0.866,0.092,0.261,0.003,0.52,0.0,0.155,0.238,0.414	0.0,0.505,0.404,0.372,0.0,0.0,0.0,0.0,0.029,0.19,0.222,0.111,0.0,0.277,0.029,0.014,0.044,0.057,0.363,0.238,0.157,0.594,0.085,0.131,0.058,0.051,0.0,0.215,0.152,0.299
NM_001002660.2443_2473	..((((.((((((...))))))...)))).	..((((.((((((.....)))))).)))).	0.258,0.235,0.241,0.062,0.295,0.148,0.101,0.0,0.0,0.0,0.0,0.037,0.704,0.51,0.232,0.0,0.02,0.0,0.0,0.0,0.196,0.292,0.362,0.964,-1,-1,-1,-1,-1,-1	0.294,0.393,0.445,0.0,0.0,0.009,0.0,0.221,0.038,0.0,0.375,0.472,0.112,0.06,0.06,0.0,0.011,0.0,0.032,0.06,0.0,0.46,0.285,0.687,0.39,0.442,0.117,0.376,0.718,0.843
NM_001002746.2931_2961	((.((.....)).)).(((.....)))...	.(((.((((((...)))..)))))).....	0.413,0.215,0.26,0.0,0.282,0.0,0.126,0.399,0.235,0.19,0.1,0.0,0.088,0.0,0.0,0.0,0.0,0.0,0.0,0.01,0.145,0.007,0.0,0.0,0.0,0.0,0.231,0.266,0.115,0.017	0.627,0.452,0.247,0.027,0.143,0.0,0.0,0.433,0.218,0.224,0.39,0.018,0.021,0.232,0.159,0.0,0.122,0.022,0.136,0.088,0.28,0.0,0.103,0.0,0.13,0.161,0.259,0.085,0.142,0.017
NM_001003421.1215_1245	...((((...((.......))....)))).	...((((..(((.........))).)))).	0.175,0.631,0.615,1.0,1.0,0.424,1.0,0.988,0.492,0.82,0.847,0.744,0.317,0.546,0.347,0.222,0.449,0.077,0.134,0.007,0.093,0.142,0.006,0.091,0.014,0.049,0.007,0.0,0.0,0.0	0.401,0.583,0.616,0.63,0.977,0.496,0.456,0.988,0.249,0.73,0.239,0.232,0.0,0.241,0.139,0.2,0.235,0.295,0.245,0.267,0.13,0.195,0.0,0.099,0.032,0.0,0.051,0.026,0.104,0.052
NM_001003425.1876_1906	(((.....))).((((......))))....	..(((.......))).((......))....	0.213,0.041,0.039,0.152,0.686,0.004,0.582,0.283,0.394,0.72,0.461,0.318,0.033,0.133,0.353,1.0,0.134,0.261,0.187,0.0,0.358,0.32,0.227,0.417,0.359,0.172,0.091,0.601,0.146,0.059	0.304,0.0,0.221,0.125,0.191,0.124,0.418,0.69,0.812,0.812,0.838,0.641,0.026,0.234,0.322,1.0,0.359,0.336,0.173,0.0,0.212,0.286,0.671,0.579,0.373,0.241,0.195,0.642,0.254,0.0
NM_001003648.2061_2091	...(((((..(((.....)))...))))).	...((((((.(((.....))).)).)))).	0.5,0.203,0.153,0.073,0.773,0.037,0.651,0.325,0.053,0.223,0.663,0.175,0.078,0.104,0.313,0.447,0.0,0.017,0.078,0.14,0.072,0.331,0.14,0.069,0.042,0.021,0.203,0.073,0.345,0.226	0.636,0.272,0.4,0.219,0.38,0.034,0.313,0.411,0.162,0.264,0.63,0.28,0.14,0.184,0.582,0.412,0.07,0.025,0.232,0.274,0.119,0.401,0.1,0.146,0.155,0.482,0.714,0.242,0.634,0.407
NM_001003762.696_726	((((.(((......))).....))))....	((((..................))))....	0.0,0.154,0.312,0.207,0.353,0.025,0.153,0.539,0.536,1.0,0.16,0.237,0.032,0.114,0.255,0.43,0.015,0.0,0.0,0.0,0.078,0.135,0.0,0.041,0.0,0.0,0.157,0.0,0.0,0.139	0.186,0.218,0.403,0.227,0.514,0.145,0.185,1.0,0.841,1.0,0.651,0.623,0.097,0.167,0.585,1.0,0.016,0.0,0.009,0.0,0.065,0.0,0.29,0.22,0.0,0.131,0.199,0.0,0.161,0.081
NM_001003863.2211_2241	..........(((....)))..........	..............................	0.081,0.074,0.203,0.047,0.194,0.011,0.011,0.122,0.0,0.024,0.023,0.0,0.63,0.752,0.049,0.165,0.413,0.045,0.305,0.576,0.338,0.276,0.193,0.0,0.076,0.04,0.004,0.0,0.004,0.032	0.063,0.336,0.404,0.222,0.134,0.243,0.026,0.0,0.078,0.023,0.255,0.126,0.747,0.731,0.439,0.284,0.628,0.408,0.384,0.654,0.794,0.306,0.161,0.152,0.017,0.056,0.013,0.037,0.0,0.0
NM_001004115.1377_1407	..((.((......))))((........)).	......(((......)))............	0.132,0.151,0.68,0.0,1.0,0.014,0.105,0.269,0.14,0.092,0.416,0.994,0.279,0.104,0.194,0.028,0.498,0.001,0.117,0.055,0.133,0.587,1.0,1.0,0.174,0.308,0.027,0.0,0.0,0.454	0.303,0.208,0.482,0.54,1.0,0.036,0.372,0.308,0.09,0.427,0.462,1.0,0.587,0.241,0.415,0.049,0.701,0.073,0.115,0.335,0.311,0.624,1.0,1.0,0.232,0.164,0.0,0.137,0.054,0.225
NM_001004117.1489_1519	(((((.((.....))..)))))........	(((....))).(((((........))))).	0.0,0.0,0.0,0.0,0.176,0.081,0.022,0.1,0.083,0.052,0.288,0.247,0.328,0.071,0.136,0.043,0.278,0.116,0.041,0.0,0.0,0.001,0.077,0.327,0.0,0.16,0.125,0.034,0.144,0.012	0.139,0.102,0.055,0.0,0.0,0.152,0.029,0.0,0.017,0.109,0.258,0.239,0.192,0.352,0.204,0.395,0.506,0.202,0.222,0.073,0.0,0.218,0.154,0.407,0.108,0.0,0.143,0.116,0.051,0.111
NM_001004289.1678_1708	....((((((...........))).)))..	.((((....)))).................	0.836,0.37,0.325,0.034,0.288,0.058,0.349,0.069,0.214,0.277,0.06,0.6,0.025,0.088,0.063,0.895,0.128,0.228,0.58,0.814,0.152,1.0,0.935,0.562,0.805,0.312,0.139,0.301,1.0,0.596	0.735,0.268,0.407,0.2,0.192,0.069,0.068,0.232,0.166,0.356,0.116,0.446,0.171,0.313,0.124,0.923,0.35,0.253,0.846,1.0,0.21,1.0,1.0,1.0,1.0,0.575,0.378,0.562,1.0,0.817
NM_001004557.2304_2334	((((((...(((...))).))).)))....	...((.((((....(((...))))))).))	0.532,0.13,0.124,0.108,0.0,0.0,0.129,0.399,0.223,0.243,0.0,0.065,0.056,0.088,0.023,0.045,0.427,0.0,0.0,0.0,0.0,0.119,0.696,0.0,0.133,0.122,0.147,0.234,0.0,0.216	0.619,0.324,0.398,0.34,0.0,0.0,0.0,0.192,0.103,0.0,0.0,0.052,0.106,0.0,0.042,0.0,0.056,0.0,0.041,0.292,0.14,0.126,0.207,0.069,0.042,0.409,0.103,0.205,0.192,0.256
NM_001004579.2290_2320	...((((....))))(((.........)))	...((((....))))(((.((...)).)))	0.363,0.203,0.298,0.082,0.02,0.0,0.0,0.0,0.065,0.3,0.046,0.047,0.024,0.269,0.131,0.385,0.211,0.155,0.314,1.0,0.299,0.0,0.272,0.318,0.563,0.289,0.346,0.016,0.197,0.145	0.242,0.536,0.561,0.136,0.114,0.0,0.0,0.122,0.124,0.664,0.203,0.051,0.154,-1,-1,-1,-1,-1,-1,-1,-1,-1,-1,-1,-1,-1,-1,-1,-1,-1
NM_001004601.1618_1648	.......((((.((((....))))..))))	.......((((.(((......)))..))))	0.26,0.133,0.13,0.004,0.027,0.0,0.421,0.348,0.121,0.507,0.084,0.159,0.384,0.236,0.687,0.493,0.887,0.487,0.934,0.847,0.941,0.0,0.024,0.111,0.078,0.031,0.052,0.159,0.0,0.101	0.332,0.257,0.314,0.023,0.042,0.01,0.502,0.521,0.281,0.724,0.403,0.453,0.791,0.433,1.0,0.79,1.0,1.0,1.0,1.0,0.93,0.078,0.0,0.092,0.018,0.084,0.021,0.047,0.0,0.0
NM_001005989.1420_1450	((((((...)))..(((.....))).))).	((((((...))).....((....)).))).	0.0,0.011,0.0,0.0,0.419,0.023,0.608,0.48,0.138,0.161,0.021,0.784,0.231,0.21,0.623,0.619,0.262,0.538,0.0,0.232,0.587,0.235,1.0,0.423,0.281,0.451,0.322,0.042,0.561,0.285	0.073,0.208,0.314,0.142,0.138,0.04,0.37,1.0,0.9,0.544,0.143,0.348,0.453,0.616,1.0,1.0,0.295,0.614,0.173,0.153,0.862,0.195,1.0,0.257,0.286,0.454,0.326,0.065,0.538,0.067
NM_001006019.1167_1197	...(((..(((((((...))))))))))..	......(((.((((((....)))))).)))	0.128,0.0,0.0,0.044,0.066,0.0,0.071,0.026,0.111,0.253,0.02,0.025,0.045,0.014,0.081,0.913,1.0,0.459,0.501,0.0,0.037,0.083,0.0,0.0,0.0,0.08,0.087,0.0,0.0,0.0	0.224,0.0,0.14,0.113,0.064,0.0,0.099,0.106,0.353,0.358,0.08,0.046,0.136,0.018,0.186,0.707,1.0,0.967,0.421,0.141,0.041,0.05,0.0,0.0,0.0,0.046,0.247,0.078,0.069,0.002
NM_001007051.3969_3999	........((((.............)))).	..............................	0.192,0.179,0.681,0.126,0.1,0.0,0.025,0.035,0.049,0.125,0.423,1.0,0.724,0.09,0.0,0.0,0.095,0.503,0.599,0.001,0.277,0.405,0.946,0.26,0.221,0.004,0.019,0.304,0.133,0.216	0.727,0.241,1.0,0.234,0.138,0.487,0.052,0.051,0.169,0.518,0.419,0.981,1.0,0.502,0.172,0.0,0.226,0.25,0.577,0.039,0.328,0.083,0.131,0.309,0.097,0.184,0.0,0.333,0.31,0.0
NM_001007055.868_898	......(((((...)))))...........	.............(((........)))...	0.055,0.24,0.239,0.097,0.42,0.0,0.062,0.127,0.209,0.154,0.416,0.485,0.068,0.121,0.326,0.126,0.514,0.051,0.0,0.171,0.387,1.0,0.573,0.142,0.0,0.033,0.039,0.624,0.988,0.495	0.127,0.175,0.617,0.249,0.507,0.011,0.188,0.302,0.254,0.321,0.712,1.0,0.093,0.147,0.263,0.067,0.932,0.303,0.107,0.544,0.634,1.0,0.922,0.241,0.049,0.04,0.039,0.326,1.0,0.401
NM_001007323.1194_1224	..............................	...((...)).((.............))..	0.031,0.0,0.374,0.153,0.734,0.05,0.0,0.007,0.0,0.108,0.035,0.0,0.0,0.323,0.076,0.524,0.035,0.241,0.252,0.083,0.221,0.199,1.0,1.0,0.099,0.038,0.621,0.675,0.079,0.26	0.578,0.227,0.67,0.278,0.541,0.0,0.109,0.093,0.0,0.0,0.0,0.0,0.0,0.405,0.109,0.093,0.116,0.178,0.336,0.254,0.397,0.45,1.0,1.0,0.292,0.055,0.355,0.212,0.069,0.031
NM_001007432.1504_1534	..(((.....((...))........)))..	..(((....................)))..	0.033,0.265,0.215,0.046,0.246,0.091,0.0,0.085,0.078,0.1,0.229,0.067,0.312,0.175,0.453,0.094,0.226,0.323,0.475,0.498,0.683,1.0,0.485,0.043,0.095,0.0,0.0,0.0,0.776,0.445	0.342,0.269,0.536,0.025,0.096,0.139,0.061,0.075,0.193,0.269,0.566,0.066,0.173,0.277,0.197,0.161,0.215,0.182,0.0,0.447,0.469,1.0,0.846,0.177,0.22,0.098,0.0,0.067,0.296,0.505
NM_001007769.1179_1209	...(((((((((....)))....))).)))	...(((((((((....))))....))).))	0.194,0.009,0.017,0.052,0.003,0.0,0.026,0.0,0.0,0.0,0.0,0.0,0.406,0.698,0.124,0.061,0.0,0.0,0.0,0.264,0.95,0.444,0.099,0.082,0.339,0.0,0.158,0.0,0.0,0.0	0.788,0.053,0.345,0.108,0.031,0.504,0.0,0.231,0.0,0.0,0.0,0.004,0.525,1.0,0.0,0.417,0.0,0.0,0.0,0.574,0.995,0.629,0.129,0.743,0.424,0.0,0.0,0.348,0.36,0.219
NM_001008575.1974_2004	......(((.((.......))...)))...	...((.....((.......)).....))..	0.0,0.006,0.0,0.199,0.509,0.0,0.239,0.187,0.328,0.011,0.0,0.071,0.008,0.34,0.772,0.049,0.518,0.307,0.049,0.155,0.262,0.036,0.208,0.0,0.054,0.145,0.11,0.268,0.027,0.298	0.072,0.438,0.652,0.426,0.473,0.0,0.323,0.914,0.703,0.428,0.0,0.0,0.153,0.381,1.0,0.209,0.569,0.493,0.24,0.366,0.362,0.192,0.331,0.053,0.296,0.236,0.081,0.091,0.176,0.047
NM_001008581.2808_2838	........((((..((...))..))))...	...(((........))).............	0.0,0.0,0.557,0.0,0.241,0.003,0.094,0.156,0.0,0.024,0.502,0.301,0.199,0.164,0.05,0.02,0.046,0.468,0.268,0.341,0.0,0.059,0.417,0.0,0.0,0.0,0.237,0.145,0.282,0.1	0.132,0.067,0.433,0.071,0.168,0.122,0.463,0.139,0.369,0.423,0.608,0.274,0.39,0.395,0.506,0.129,0.092,0.545,0.501,0.86,0.199,0.238,0.225,0.068,0.086,0.166,0.0,0.105,0.231,0.352
NM_001008621.1660_1690	(((((((.....))....))))).......	(((((.............))))).......	0.0,0.0,0.0,0.0,0.438,0.003,0.126,1.0,1.0,0.95,0.838,0.694,0.165,1.0,1.0,0.035,0.104,0.0,0.0,0.037,0.018,0.075,0.033,0.169,1.0,0.0,0.0,0.149,0.439,0.637	0.054,0.0,0.024,0.067,0.587,0.241,0.385,1.0,1.0,1.0,1.0,0.658,0.306,0.606,1.0,0.332,0.179,0.143,0.061,0.011,0.052,0.197,0.004,0.235,0.527,0.045,0.0,0.15,0.464,1.0
NM_001008621.2065_2095	..(((((.(((.....)))))..)))....	..(((..((((.....))))...)))....	0.229,0.345,0.283,0.028,0.217,0.0,0.086,0.192,0.122,0.197,0.581,0.175,0.031,0.27,0.197,0.081,0.665,0.0,0.259,0.839,0.106,0.073,0.077,0.026,0.127,0.659,0.0,0.218,0.48,0.458	0.218,0.256,0.065,0.029,0.0,0.02,0.378,0.419,0.443,0.545,0.442,0.454,0.255,0.433,0.277,0.193,0.068,0.114,0.246,0.537,0.285,0.326,0.249,0.193,0.0,0.56,0.104,0.097,0.271,0.453
NM_001009914.1655_1685	...........(((((....))))).....	..(((..........))).(((.....)))	0.162,0.547,0.189,0.0,0.491,0.097,0.258,0.682,1.0,0.015,0.098,0.175,0.461,0.0,0.022,0.005,0.0,0.056,0.0,0.0,0.0,0.0,0.377,0.089,0.093,0.0,0.0,0.076,0.462,0.132	0.402,0.115,0.705,0.3,0.812,0.116,0.516,1.0,1.0,0.518,0.514,0.693,0.559,0.44,0.461,0.0,0.034,0.224,0.0,0.0,0.08,0.094,0.727,0.105,0.059,0.0,0.0,0.098,0.375,0.337
NM_001009987.1283_1313	........(((...((.....))...))).	...(((((..............))..))).	0.776,0.471,0.447,0.06,0.406,0.0,0.082,0.086,0.103,0.0,0.3,0.452,0.185,0.862,0.658,0.0,0.039,0.0,0.451,0.3,0.97,0.098,0.1,0.57,0.161,0.06,0.017,0.112,0.002,0.092	0.494,0.388,0.226,0.204,0.024,0.108,0.051,0.402,0.041,0.175,0.668,0.597,0.264,0.781,0.559,0.358,0.384,0.321,0.076,0.312,0.488,0.19,0.221,0.298,0.19,0.174,0.053,0.277,0.0,0.087
NM_001013536.1029_1059	...(((...................)))..	..............................	0.612,0.239,0.344,0.216,0.852,0.261,0.423,0.879,0.348,0.085,0.753,0.284,0.09,0.174,0.503,0.148,0.139,0.225,0.427,0.308,0.07,0.13,0.25,0.398,0.074,0.033,0.085,0.016,0.218,0.246	0.614,0.294,0.584,0.387,0.934,0.571,0.468,0.667,0.73,0.252,0.817,0.367,0.087,0.202,0.459,0.218,0.195,0.201,0.49,0.307,0.151,0.11,0.222,0.311,0.191,0.181,0.114,0.004,0.155,0.229
NM_001013544.1143_1173	..((((....)).))...............	.........(((........))).......	0.551,0.179,0.202,0.045,0.433,0.0,0.064,0.091,0.451,0.12,0.058,0.21,0.013,0.154,0.0,0.052,0.385,0.354,0.653,0.099,0.355,0.639,0.0,0.077,0.481,0.136,0.437,0.093,0.184,0.343	0.438,0.376,0.384,0.093,0.295,0.181,0.0,0.136,0.185,0.257,0.116,0.4,0.079,0.174,0.059,0.221,0.293,0.378,0.364,0.229,0.365,0.093,0.22,0.0,0.313,0.048,0.19,0.054,0.0,0.464
NM_001013545.868_898	.((.(((........))).)).........	....(((........))).(((....))).	0.753,0.006,0.154,0.02,0.0,0.0,0.157,0.251,0.392,0.651,0.154,0.451,0.194,0.098,0.142,0.044,0.111,0.281,0.228,0.043,0.104,0.0,0.128,0.028,0.043,0.194,0.306,0.692,0.649,0.065	0.632,0.249,0.307,0.05,0.0,0.122,0.146,0.338,0.474,0.706,0.169,0.354,0.333,0.017,0.182,0.243,0.142,0.397,0.232,0.143,0.0,0.031,0.152,0.162,0.189,0.177,0.257,0.194,0.516,0.22
NM_001014322.1909_1939	...((.....))..((((........))))	...((.((.......))))...........	0.142,0.0,0.154,0.063,0.0,0.0,0.077,0.179,0.113,0.265,0.0,0.08,0.484,1.0,0.321,0.085,0.696,0.035,0.289,0.435,0.075,0.207,0.487,0.218,0.708,0.214,0.091,0.055,0.308,1.0	0.49,0.223,0.21,0.27,0.0,0.0,0.104,0.185,0.573,0.837,0.293,0.169,0.828,1.0,0.81,0.168,0.71,0.231,0.213,0.291,0.376,0.113,0.671,0.338,0.745,0.414,0.257,0.769,0.885,1.0
NM_001015060.1786_1816	((((............))))..........	........(((.......))).........	0.053,0.004,0.049,0.016,0.403,0.124,0.024,0.262,0.244,0.025,0.04,0.0,0.054,0.23,0.0,0.082,0.014,0.045,0.397,0.155,0.096,0.1,0.152,0.54,0.888,0.678,1.0,0.484,0.106,0.279	0.169,0.012,0.2,0.117,0.156,0.043,0.045,0.0,0.199,0.053,0.0,0.022,0.0,0.013,0.0,0.054,0.019,0.07,0.248,0.062,0.05,0.072,0.163,0.477,0.708,0.701,0.928,0.54,0.2,0.272
NM_001017565.646_676	(((..((((......)))).))).......	((.((((((......)))).....))..))	0.171,0.227,0.584,0.161,0.751,0.0,0.134,0.028,0.021,0.0,0.0,0.0,0.127,0.607,0.0,0.0,0.047,0.316,1.0,1.0,0.25,0.397,0.437,0.475,0.085,0.186,0.473,0.161,0.0,0.017	0.34,0.656,0.865,0.19,0.299,0.0,0.136,0.011,0.021,0.0,0.0,0.024,0.179,0.533,0.355,0.138,0.07,0.303,0.873,1.0,0.505,0.369,0.612,0.588,0.235,0.322,0.242,0.368,0.0,0.083
NM_001017634.1230_1260	.(((.(((.........)))))).......	..........(((....)))..........	1.0,0.686,0.892,0.038,0.188,0.077,0.056,0.084,0.039,0.393,0.0,0.0,0.0,0.47,0.591,0.096,0.068,0.329,0.283,0.097,0.011,0.29,0.0,0.0,0.165,0.912,0.284,0.298,0.166,0.0	1.0,0.96,1.0,0.091,0.212,0.073,0.106,0.303,0.016,0.322,0.153,0.0,0.168,0.449,0.929,0.167,0.051,0.535,0.473,0.093,0.102,0.54,0.303,0.247,0.514,0.592,0.37,0.124,0.126,0.14
NM_001017759.980_1010	......(((...........))).......	..............................	0.0,0.033,0.0,0.0,0.061,0.0,0.146,0.125,0.135,0.353,0.293,0.951,0.0,0.03,0.626,0.087,0.015,0.324,0.0,0.263,0.188,0.036,0.173,0.495,0.241,0.886,0.456,0.235,0.144,0.722	0.115,0.072,0.175,0.058,0.195,0.388,0.17,0.45,0.366,0.524,0.671,0.861,0.133,0.162,0.725,0.096,0.224,0.046,0.084,0.395,0.105,0.15,0.127,0.496,0.361,0.637,0.613,0.599,0.334,0.785
NM_001017812.874_904	...(((((.((....)))))))........	...(((((.........)))))........	0.506,0.267,0.365,0.119,0.446,0.116,0.035,0.076,0.666,0.384,0.232,0.624,0.147,0.195,0.882,0.369,0.076,0.149,0.038,0.0,0.021,0.034,0.048,0.0,0.0,0.116,0.0,0.006,0.113,0.154	0.359,0.637,0.706,0.158,0.491,0.212,0.15,0.284,0.82,0.379,0.396,0.629,0.3,0.155,0.539,0.227,0.517,0.13,0.022,0.162,0.0,0.0,0.092,0.009,0.084,0.235,0.134,0.071,0.287,0.092
NM_001017819.2224_2254	(((.....(((((...))).)).....)))	....((..(((((.........))))).))	0.063,0.52,0.049,0.262,0.0,0.0,0.063,0.0,0.164,0.048,0.0,0.114,0.545,0.0,0.076,0.0,0.0,0.0,0.104,0.204,0.427,0.0,0.0,0.182,0.013,0.529,0.017,-1,-1,-1	0.297,0.929,0.466,0.16,0.162,0.376,0.0,0.0,0.0,0.233,0.132,0.159,0.216,0.189,0.568,0.061,0.096,0.065,0.268,0.172,0.041,0.038,0.0,0.0,0.0,0.169,0.0,0.0,0.0,0.105
NM_001017874.418_448	...((.................))......	..............................	0.597,0.298,0.384,0.186,0.361,0.0,0.09,0.208,0.346,0.19,0.133,0.119,0.085,0.712,0.115,0.201,0.505,0.169,0.16,0.204,0.094,0.348,0.036,0.22,0.342,0.159,0.174,0.177,0.583,0.096	1.0,0.889,0.641,0.321,0.625,0.157,0.227,0.334,0.49,0.449,0.265,0.316,0.334,0.97,0.379,0.403,0.795,0.614,0.287,0.229,0.321,0.379,0.137,0.25,0.45,0.145,0.404,0.124,0.869,0.23
NM_001018135.3280_3310	.((((..((.......)).)))).......	...(((......)))..((((...))))..	0.353,0.334,0.146,0.038,0.453,0.191,0.115,0.133,0.028,0.104,0.768,0.345,0.279,0.021,0.067,0.0,0.0,0.106,0.134,0.0,0.091,0.024,0.029,0.0,0.218,0.0,0.052,0.082,0.264,0.44	0.827,0.438,0.45,0.267,0.356,0.33,0.498,0.296,0.067,0.103,0.254,0.59,0.253,0.097,0.0,0.014,0.0,0.078,0.26,0.037,0.092,0.101,0.12,0.067,0.149,0.0,0.052,0.057,0.581,0.112
NM_001020568.2841_2871	.(((((((....)))...))))........	(((........)))................	0.202,0.101,0.147,0.06,0.482,0.0,0.166,0.266,0.162,0.783,0.205,0.022,0.225,0.0,0.352,0.803,0.305,0.477,0.109,0.345,1.0,0.289,0.452,1.0,0.092,0.125,0.603,0.407,0.31,0.522	0.336,0.084,0.0,0.103,0.567,0.0,0.438,0.101,0.164,0.892,0.469,0.287,0.166,0.259,0.681,1.0,0.98,0.642,0.975,1.0,1.0,1.0,0.501,1.0,0.835,0.635,1.0,0.76,0.422,0.551
NM_001020578.2126_2156	.(((.....))).((.....))........	...(((....))).................	0.067,0.011,0.11,0.089,0.515,0.146,0.531,0.594,0.138,0.062,0.15,0.092,0.356,0.0,0.054,0.214,0.0,0.114,0.0,0.011,0.223,0.148,0.374,0.027,0.176,0.827,0.309,0.094,0.358,0.268	0.255,0.054,0.312,0.091,0.436,0.405,0.359,0.69,0.387,0.07,0.209,0.092,0.054,0.037,0.292,0.381,0.073,0.149,0.102,0.059,0.337,0.186,0.268,0.202,0.312,0.765,0.536,0.304,0.356,0.6
NM_001020688.884_914	...(((((.......(((...)))))))).	...((....))((.((((.....)))).))	0.058,0.074,0.139,0.0,0.121,0.013,0.164,0.111,0.277,0.093,0.276,0.389,0.713,0.702,0.227,0.346,0.0,0.22,0.531,0.552,0.282,0.426,0.02,0.062,0.082,0.022,0.07,0.615,0.144,0.416	0.148,0.132,0.155,0.048,0.015,0.067,0.117,0.149,0.276,0.219,0.221,0.334,0.356,0.47,0.147,0.036,0.134,0.354,0.782,0.72,0.49,0.729,0.136,0.034,0.023,0.209,0.09,0.748,0.169,0.253
NM_001024395.727_757	(((((((.....)))).)))..........	(((((((.....))).))))..........	0.118,0.16,0.219,0.114,0.834,0.067,0.0,0.011,0.0,0.0,0.0,0.175,0.064,0.187,0.0,0.0,0.105,0.253,0.559,1.0,1.0,0.0,0.158,0.947,0.281,0.847,0.164,0.057,0.152,1.0	0.307,0.354,0.419,0.199,1.0,0.129,0.053,0.139,0.0,0.048,0.0,0.344,0.327,0.657,0.119,0.013,0.183,0.392,0.659,1.0,1.0,0.397,0.356,1.0,0.484,0.806,0.633,0.389,0.504,1.0
NM_001024441.738_768	((((....(((........)))))))....	...(((..(((........))).....)))	0.003,0.259,0.221,0.093,0.231,0.095,0.094,0.038,0.132,0.005,0.11,0.308,0.628,0.0,0.279,0.494,1.0,0.07,0.113,0.219,0.0,0.07,0.265,0.0,0.041,0.293,0.106,0.115,0.006,0.179	0.206,0.285,0.864,0.113,0.247,0.103,0.159,0.229,0.098,0.049,0.083,0.18,0.556,0.136,0.172,0.589,0.681,0.462,0.356,0.229,0.062,0.046,0.131,0.015,0.0,0.163,0.028,0.037,0.118,0.186
NM_001025503.1277_1307	(((..((..........))..)))......	................(((......)))..	0.078,0.294,0.319,0.085,0.296,0.084,0.239,0.206,0.649,0.133,0.095,0.096,0.647,0.07,0.021,0.014,0.234,0.239,0.172,0.469,0.199,0.261,0.197,0.423,0.933,0.112,0.169,0.061,0.139,0.65	0.369,0.645,0.655,0.172,0.176,0.0,0.195,0.115,0.737,0.091,0.128,0.211,0.944,0.238,0.0,0.0,0.265,0.343,0.145,0.338,0.216,0.345,0.412,0.276,0.71,0.168,0.0,0.1,0.225,0.499
NM_001025503.928_958	.(((......))).................	..............................	0.116,0.222,0.311,0.009,0.269,0.029,0.125,0.056,0.223,0.074,0.217,0.532,0.537,0.016,0.0,0.029,0.044,0.0,0.0,0.16,0.021,0.114,0.598,0.151,0.318,0.611,1.0,0.175,0.418,0.106	0.659,0.817,0.8,0.267,0.671,0.091,0.331,0.301,0.246,0.388,0.396,0.731,0.996,0.166,0.0,0.084,0.0,0.188,0.197,0.502,0.427,0.179,0.827,0.263,0.718,1.0,1.0,0.512,0.706,0.11
NM_001030203.2515_2545	...((...(((((.((...))..)))))))	...(((........))).((......))..	0.217,0.124,0.217,0.063,0.425,0.0,0.068,0.144,0.315,0.0,0.16,1.0,0.852,0.293,0.54,0.076,0.449,0.078,0.0,0.302,0.29,0.068,0.208,0.041,0.157,0.035,0.0,0.0,0.0,0.052	0.596,0.146,0.376,0.008,0.63,0.268,0.038,0.376,0.321,0.364,0.525,1.0,1.0,0.47,0.553,0.655,0.484,0.535,0.004,0.646,0.796,0.417,0.453,0.141,0.327,0.194,0.029,0.146,0.359,0.169
NM_001030227.2101_2131	.(((((..((....)))))...))......	...(((..((....)))))...........	0.113,0.0,0.018,0.0,0.069,0.0,0.068,0.019,0.048,0.252,1.0,0.759,0.575,0.0,0.088,0.0,0.11,0.0,0.0,0.044,0.292,0.203,0.11,0.099,0.201,0.214,0.335,1.0,0.92,0.644	0.301,0.036,0.12,0.007,0.074,0.037,0.062,0.233,0.199,0.231,1.0,0.882,0.293,0.086,0.0,0.173,0.305,0.083,0.0,0.164,0.412,0.366,0.317,0.3,0.182,0.201,0.69,1.0,0.8,0.816
NM_001033731.740_770	..((....(((((...)))))..)).....	........((((.....)))).........	-1,-1,-1,-1,0.887,0.0,0.0,0.0,0.0,0.094,0.164,0.32,0.385,1.0,0.31,0.097,0.016,0.088,0.0,0.045,0.035,0.318,0.0,0.0,0.006,0.209,0.856,0.595,0.646,0.134	0.069,0.159,0.316,0.223,0.369,0.025,0.025,0.213,0.121,0.202,0.33,1.0,1.0,1.0,0.201,0.525,0.099,0.648,0.0,0.204,0.234,0.208,0.173,0.0,0.0,0.554,1.0,0.559,0.532,0.6
NM_001033919.1478_1508	(((....)))....................	......((.(((..........))).))..	0.111,0.104,0.0,0.0,0.0,0.0,0.0,0.031,0.0,0.0,0.354,0.688,0.126,0.153,0.658,0.207,0.306,0.481,0.439,0.257,1.0,0.383,1.0,0.246,0.0,0.016,0.19,0.944,0.191,0.067	0.015,0.385,0.09,0.008,0.216,0.131,0.072,0.144,0.176,0.248,0.39,0.53,0.129,0.302,0.534,0.546,0.716,0.367,0.745,0.422,0.625,0.847,0.578,0.211,0.366,0.202,0.18,0.299,0.379,0.163
NM_001033919.1811_1841	....(((.(((((....)))))))).....	....((.((((((....)))))))).....	0.092,0.092,0.21,0.094,0.154,0.0,0.015,0.015,0.143,0.052,0.006,0.265,0.021,0.115,0.085,0.304,0.397,0.199,0.47,0.16,0.0,0.0,0.0,0.0,0.069,0.019,0.995,-1,-1,-1	0.274,0.273,0.289,0.377,0.091,0.146,0.124,0.191,0.3,0.273,0.165,0.162,0.131,0.082,0.16,0.315,0.898,0.0,0.407,0.232,0.0,0.01,0.036,0.369,0.162,0.139,1.0,-1,-1,-1
NM_001034183.2049_2079	......((((((((.......)))))))).	...((((.(((..........)))))))..	0.061,0.125,0.109,0.109,0.296,0.011,0.281,0.112,0.383,0.012,0.164,0.16,0.487,0.032,0.257,0.123,0.086,0.275,0.585,0.055,0.094,0.005,0.0,0.114,0.0,0.067,0.311,0.148,0.18,0.239	0.06,0.095,0.13,0.029,0.041,0.009,0.165,0.283,0.412,0.115,0.204,0.183,0.754,0.61,0.188,0.053,0.012,0.219,0.536,0.045,0.243,0.0,0.0,0.008,0.0,0.139,0.623,0.291,0.255,0.08
NM_001034982.2807_2837	((((.((....)))))).............	.......(((......)))...........	0.283,0.447,0.509,0.179,0.802,0.0,0.0,0.119,0.073,0.081,0.352,0.303,0.275,0.238,0.01,0.305,0.075,0.485,0.505,0.056,0.266,0.611,0.121,0.495,0.381,0.425,0.23,0.363,0.113,0.327	0.293,0.637,0.86,0.265,0.567,0.442,0.0,0.277,0.371,0.132,0.75,0.706,0.397,0.595,0.091,0.258,0.129,0.063,0.321,0.127,0.644,0.495,0.222,0.424,0.444,0.593,0.777,0.402,0.488,0.366
NM_001037570.1769_1799	(((((((.(((....))))).))...))).	...((((.(((....))))).)).......	0.146,0.217,0.088,0.0,0.0,0.03,0.061,0.069,0.008,0.0,0.096,0.343,1.0,0.81,1.0,0.543,0.237,0.46,0.092,0.153,0.397,0.193,0.133,0.337,0.838,1.0,0.109,0.086,0.0,0.0	0.417,0.251,0.48,0.156,0.0,0.452,0.082,0.024,0.144,0.249,0.219,0.489,1.0,0.869,1.0,0.766,0.47,0.729,0.291,0.227,0.464,0.168,0.089,0.315,0.512,0.474,0.413,0.354,0.125,0.0
NM_001039995.1325_1355	..(((.........))).(((......)))	..(((.........))).((...)).....	0.123,0.114,0.191,0.024,0.205,0.0,0.0,0.06,0.184,0.098,0.062,0.0,0.068,0.035,0.014,0.118,0.067,0.079,0.0,0.0,0.0,0.319,0.077,0.0,0.0,0.671,0.111,0.091,0.447,0.249	0.398,0.095,0.586,0.0,0.018,0.141,0.0,0.098,0.462,0.376,0.0,0.07,0.093,0.165,0.134,0.081,0.206,0.167,0.0,0.0,0.042,0.728,0.219,0.092,0.0,0.241,0.115,0.195,0.707,0.301
NM_001040245.2367_2397	.((....)).(((((...))))).......	...((((.((.......)).))))......	0.777,0.38,0.111,0.082,0.323,0.026,0.0,0.016,0.191,0.0,0.081,0.0,0.013,0.052,0.0,0.008,0.075,0.099,0.124,0.145,0.241,0.544,0.045,0.285,0.471,0.269,0.0,0.235,0.078,0.0	1.0,0.411,0.206,0.0,0.0,0.0,0.029,0.0,0.0,0.017,0.0,0.0,0.0,0.0,0.0,0.0,0.089,0.0,0.0,0.356,0.279,1.0,0.165,0.499,0.215,0.14,0.245,0.252,0.0,0.0
NM_001040299.1338_1368	...(((...)))...((((.......))))	...((.((.....)))).((((...)))).	0.956,0.509,0.522,0.149,0.178,0.02,0.058,0.0,0.0,0.0,0.055,0.314,0.135,0.004,0.045,0.004,0.0,0.096,0.409,0.263,0.093,0.381,0.003,0.187,0.246,0.821,0.109,0.321,0.405,0.185	1.0,1.0,0.849,0.288,0.065,0.063,0.026,0.031,0.0,0.0,0.056,0.273,0.232,0.048,0.059,0.028,0.024,0.116,0.101,0.222,0.1,0.397,0.009,0.157,0.148,0.41,0.215,0.55,0.394,0.339
NM_001044756.2568_2598	(((....)))..(((....)))........	(((....)))....................	0.126,0.049,0.113,0.009,0.263,0.065,0.05,0.13,0.21,0.635,0.472,0.245,0.29,0.173,0.06,0.23,0.426,0.146,0.023,0.477,0.11,0.007,0.072,0.0,0.055,0.071,0.002,0.059,0.223,0.266	0.254,0.0,0.231,0.117,0.335,0.164,0.061,0.292,0.24,0.827,0.541,0.166,0.497,0.327,0.16,0.874,0.914,0.462,0.15,0.388,0.352,0.241,0.032,0.0,0.0,0.225,0.0,0.146,0.114,0.355
NM_001044907.1618_1648	((((.......((....)).....)).)).	...((......)).................	0.147,0.0,0.094,0.068,0.27,0.0,0.752,0.403,0.316,0.287,0.186,0.0,0.08,1.0,0.554,0.142,0.03,0.017,0.0,0.0,0.0,0.041,0.05,0.008,0.0,0.022,0.0,0.083,0.418,0.242	0.102,0.092,0.219,0.071,0.24,0.087,0.9,0.551,0.642,0.153,0.272,0.006,0.107,0.744,0.495,0.449,0.218,0.028,0.064,0.0,0.075,0.0,0.081,0.025,0.099,0.028,0.0,0.21,0.422,0.148
NM_001044908.1003_1033	...((.............))..........	.......(((((.....)).))).......	0.499,0.621,0.588,0.325,0.64,0.187,0.225,0.367,0.642,0.13,0.448,0.159,0.233,0.393,0.0,0.095,0.0,0.0,0.0,0.0,0.0,0.162,0.743,0.202,0.741,0.775,1.0,0.251,0.079,0.042	0.574,0.834,0.881,0.237,0.553,0.164,0.262,0.294,0.392,0.099,0.288,0.117,0.148,0.0,0.0,0.003,0.0,0.0,0.0,0.0,0.005,0.044,0.522,0.276,0.535,1.0,0.801,0.507,0.095,0.007
NM_001044921.2523_2553	....((..((((((...))).)))..))..	(((.....((((((...))).)))..))).	0.113,0.11,0.186,0.024,0.704,0.0,0.444,0.123,0.027,0.286,0.773,0.229,0.129,0.0,0.038,0.056,0.345,1.0,0.053,0.152,0.575,0.064,0.105,0.075,0.324,0.139,0.0,0.126,0.473,0.063	0.243,0.0,0.087,0.125,0.765,0.0,0.081,0.205,0.142,0.44,1.0,0.353,0.313,0.027,0.0,0.18,0.411,0.43,0.108,0.345,0.636,0.197,0.248,0.139,0.292,0.185,0.13,0.138,0.402,0.21
NM_001045098.2113_2143	.......(((((....))))).........	....((.(((((....)))))..)).....	0.051,0.045,0.285,0.004,0.163,0.129,0.202,0.232,0.213,0.172,0.569,0.307,0.117,0.0,0.368,0.349,0.066,0.188,0.157,0.234,0.238,1.0,0.373,0.173,1.0,1.0,0.206,0.902,0.802,0.184	0.11,0.0,0.058,0.06,0.098,0.0,0.148,0.051,0.157,0.081,0.317,0.057,0.085,0.001,0.0,0.33,0.0,0.082,0.423,0.154,0.43,0.533,0.262,0.381,0.355,1.0,0.039,0.068,0.428,0.0
NM_001045207.3896_3926	...((....)).((.(((...))).))...	...((....)).((.(((....)))))...	0.179,0.268,0.316,0.0,0.293,0.0,0.0,0.0,0.208,0.0,0.0,0.0,0.275,0.642,0.122,0.0,0.15,0.124,0.688,1.0,1.0,0.042,0.062,0.029,0.152,0.232,0.947,0.483,0.485,0.203	0.185,0.443,0.733,0.0,0.005,0.0,0.017,0.0,0.012,0.0,0.0,0.0,0.511,0.889,0.148,0.119,0.109,0.0,0.47,1.0,0.993,0.358,0.067,0.048,0.1,0.16,0.668,1.0,0.669,0.406
NM_001045453.1399_1429	...((((...)).))...............	...((........))...............	0.481,0.368,0.857,0.457,0.0,0.0,0.0,0.0,0.0,0.009,0.104,0.948,0.298,0.0,0.099,0.135,0.075,0.274,0.0,0.304,0.336,0.155,0.03,0.245,0.031,0.0,0.0,0.185,0.114,0.0	0.958,0.273,1.0,0.452,0.218,0.0,0.0,0.0,0.18,0.327,0.536,1.0,0.811,0.09,0.006,0.346,0.107,0.24,0.066,0.653,0.609,0.344,0.125,0.405,0.011,0.0,0.173,0.417,0.106,0.0
NM_001075108.2099_2129	......(((...((((....)))).)))..	......(((((.(((...))).)).)))..	0.0,0.283,0.482,0.082,0.0,0.0,0.005,0.0,0.047,0.405,0.797,0.406,0.1,0.078,0.242,0.052,1.0,1.0,0.291,0.669,0.523,0.005,0.1,0.069,0.0,0.027,0.0,0.0,0.0,0.013	0.419,0.401,0.669,0.234,0.2,0.115,0.442,0.091,0.137,0.167,0.993,0.56,0.443,0.455,0.267,0.489,0.504,1.0,0.185,0.412,0.431,0.739,0.231,0.011,0.055,0.0,0.0,0.0,0.0,0.011
NM_001076560.1671_1701	((......))..(((...))).........	..(((.......)))...............	0.085,0.534,0.433,0.0,0.795,0.05,0.107,0.121,0.065,0.021,0.0,0.0,0.0,0.005,0.013,0.789,0.391,0.465,0.467,0.213,0.146,0.049,0.12,0.215,0.192,0.13,0.188,0.808,0.921,0.0	0.304,0.387,0.547,0.161,0.435,0.16,0.0,0.201,0.038,0.075,0.008,0.126,0.0,0.0,0.2,0.714,0.558,0.56,0.835,0.339,0.133,0.216,0.477,0.348,0.191,0.173,0.153,1.0,1.0,0.131
NM_001077162.1700_1730	((.(((....))).))..............	.........(((........))).......	0.0,0.099,0.039,0.076,0.371,0.233,0.341,0.08,0.213,0.0,0.016,0.035,0.0,0.087,0.174,1.0,0.374,0.397,0.911,0.22,0.144,0.055,0.016,0.161,0.637,0.084,0.041,0.122,0.264,0.156	0.074,0.0,0.366,0.231,0.374,0.634,0.333,0.436,0.394,0.082,0.035,0.029,0.061,0.324,0.416,1.0,0.996,0.682,1.0,0.276,0.249,0.0,0.06,0.306,0.499,0.119,0.029,0.177,0.441,0.276
NM_001077329.988_1018	.((....))(((.((.....))))).....	.........(((.((.....))))).....	0.003,0.008,0.156,0.0,0.429,0.0,0.124,0.184,0.004,0.069,0.088,0.305,0.216,0.959,0.957,0.518,1.0,1.0,0.082,0.263,0.247,0.0,0.039,0.0,0.139,0.491,0.0,0.0,0.0,0.0	0.037,0.033,0.311,0.177,0.427,0.342,0.091,0.22,0.538,0.027,0.074,0.174,0.726,0.952,0.874,0.767,1.0,1.0,0.268,0.708,0.425,0.1,0.189,0.154,0.104,0.797,0.525,0.069,0.164,0.0
[truncated: 212 more rows]

## Sheet: sphere_shield
transcript.start_end	dot(sphere)	dot(shield)	shape(sphere)	shape(shield)
[truncated: 110 more rows]

## Sheet: GSEA
Category	Term	Count	%	PValue	Genes	List Total	Pop Hits	Pop Total	Fold Enrichment	Bonferroni	Benjamini	FDR
[truncated: 301 more rows]
