# Supplementary material for: RNA structural dynamics regulate early embryogenesis through controlling transcriptome fate and function
Source: Genome Biol. 2020 May 18;21:120. doi: 10.1186/s13059-020-02022-2 (PMC7236375; doi:10.1186/s13059-020-02022-2)
Supplement: Supplementary file 7 — Table S6. Elavl1a binding sites at 4 h.p.f. Elavl1a binding sites identified by Flag-Elavl1a iCLIP at 4 h.p.f. and 6 h.p.f. [file 13059_2020_2022_MOESM7_ESM.xlsx]

## Sheet: Readme
Table S6. Elavl1a binding sites at 4 h.p.f. Elavl1a binding sites identified by Flag-Elavl1a iCLIP at 4 h.p.f. and 6 h.p.f.
Sheetname	Description
iCLIP 4 h.p.f.	Elavl1a binding sites at 4 h.p.f. identified by Flag-Elavl1a iCLIP
iCLIP 6 h.p.f.	Elavl1a binding sites at 6 h.p.f. identified by Flag-Elavl1a iCLIP

## Sheet: iCLIP 4hpf
TransID	start(0-based)	end(0-based)	region
NM_001001399	985	1026	utr3
NM_001001400	1945	1986	utr3
NM_001001402	2422	2463	utr3
NM_001001402	2669	2710	utr3
NM_001001403	3834	3875	utr3
NM_001001403	3979	4020	utr3
NM_001001404	944	985	utr3
NM_001001404	1063	1104	utr3
NM_001001590	172	213	cds
NM_001001590	1279	1320	utr3
NM_001001591	1590	1631	cds
NM_001001591	2095	2136	cds
NM_001001724	560	601	utr3
NM_001001729	813	854	utr3
NM_001001729	1250	1291	utr3
NM_001001729	1899	1940	utr3
NM_001001729	2283	2324	utr3
NM_001001729	2347	2422	utr3
NM_001001729	2447	2488	utr3
NM_001001811	1102	1143	utr3
NM_001001811	1495	1536	utr3
NM_001001811	1548	1589	utr3
NM_001001811	1590	1631	utr3
NM_001001811	1714	1755	utr3
NM_001001818	246	287	utr5
NM_001001818	1692	1733	utr3
NM_001001818	1827	1868	utr3
NM_001001818	1952	1993	utr3
NM_001001818	2089	2130	utr3
NM_001001818	2395	2436	utr3
NM_001001818	2525	2566	utr3
NM_001001819	443	484	utr3
NM_001001820	12	53	utr5
NM_001001820	1530	1571	utr3
NM_001001820	1963	2004	utr3
NM_001001822	1424	1491	cds
NM_001001822	1711	1793	cds
NM_001001822	1880	1960	utr3
NM_001001822	2511	2552	utr3
NM_001001828	1157	1198	utr3
NM_001001830	1706	1779	utr3
NM_001001830	1880	1921	utr3
NM_001001830	1997	2038	utr3
NM_001001830	2430	2471	utr3
NM_001001830	2579	2620	utr3
NM_001001830	3044	3085	utr3
NM_001001830	3095	3136	utr3
NM_001001836	1774	1815	utr3
NM_001001844	733	774	cds
NM_001001844	962	1003	cds
NM_001001844	1648	1689	cds
NM_001001844	1961	2002	cds
NM_001001844	2166	2207	cds
NM_001001844	2625	2666	utr3
NM_001001844	3180	3221	utr3
NM_001001844	3280	3321	utr3
NM_001001844	3340	3381	utr3
NM_001001844	3420	3461	utr3
NM_001001844	3822	3863	utr3
NM_001001844	3890	3931	utr3
NM_001001844	3939	3980	utr3
NM_001001844	4011	4052	utr3
NM_001001886	3437	3478	utr3
NM_001001886	3506	3623	utr3
NM_001001886	3768	3809	utr3
NM_001001886	3832	3873	utr3
NM_001001886	3923	3964	utr3
NM_001001886	4001	4042	utr3
NM_001001940	176	217	cds
NM_001001940	2674	2715	cds
NM_001001940	2841	2882	cds
NM_001001940	2950	2991	utr3
NM_001001940	3009	3050	utr3
NM_001001940	3116	3157	utr3
NM_001001941	4037	4078	utr3
NM_001001943	2594	2635	utr3
NM_001001943	2827	2868	utr3
NM_001001943	3362	3436	utr3
NM_001001943	3624	3665	utr3
NM_001001943	3749	3790	utr3
NM_001001943	3874	3941	utr3
NM_001001943	4176	4217	utr3
NM_001001943	4238	4279	utr3
NM_001001943	4344	4385	utr3
NM_001001944	508	586	cds
NM_001001944	3016	3057	cds
NM_001001944	3084	3125	utr3
NM_001001944	3139	3180	utr3
NM_001001944	3192	3233	utr3
NM_001001944	3443	3484	utr3
NM_001001944	3547	3588	utr3
NM_001001948	503	544	cds
NM_001001950	1693	1734	utr3
NM_001001950	1754	1795	utr3
NM_001001950	1854	1895	utr3
NM_001002013	1650	1691	cds
NM_001002037	989	1030	cds
NM_001002037	1054	1095	cds
NM_001002037	1201	1242	cds
NM_001002037	1286	1327	cds
NM_001002040	1002	1043	utr3
NM_001002040	1099	1140	utr3
NM_001002041	2297	2338	cds
NM_001002050	633	674	cds
NM_001002050	1046	1087	utr3
NM_001002051	933	1002	utr3
NM_001002051	1100	1141	utr3
NM_001002051	1243	1284	utr3
NM_001002051	1680	1721	utr3
NM_001002051	1738	1779	utr3
NM_001002053	714	794	utr3
NM_001002053	946	987	utr3
NM_001002055	1619	1660	utr3
NM_001002056	787	828	cds
NM_001002056	1017	1098	cds
NM_001002056	1252	1329	cds
NM_001002058	1404	1445	utr3
NM_001002061	1151	1192	utr3
NM_001002063	2019	2060	cds
NM_001002064	1582	1623	utr3
NM_001002067	563	604	utr3
NM_001002067	636	677	utr3
NM_001002067	722	763	utr3
NM_001002069	114	155	cds
NM_001002069	290	331	cds
NM_001002072	504	545	utr3
NM_001002072	558	599	utr3
NM_001002072	694	735	utr3
NM_001002072	805	846	utr3
NM_001002072	849	890	utr3
NM_001002072	970	1011	utr3
NM_001002072	1072	1113	utr3
NM_001002073	559	600	utr3
NM_001002073	683	724	utr3
NM_001002073	825	900	utr3
NM_001002073	1032	1073	utr3
NM_001002078	323	398	utr3
NM_001002080	3388	3429	cds
NM_001002081	525	566	utr3
NM_001002082	649	690	utr3
NM_001002082	713	791	utr3
NM_001002082	851	892	utr3
NM_001002089	1802	1875	utr3
NM_001002096	1114	1155	utr3
NM_001002099	1045	1086	utr3
NM_001002099	1608	1649	utr3
NM_001002104	1459	1500	utr3
NM_001002106	96	137	cds
NM_001002106	797	838	cds
NM_001002106	995	1036	utr3
NM_001002107	803	844	utr3
NM_001002115	464	505	cds
NM_001002115	1335	1376	utr3
NM_001002116	827	868	cds
NM_001002116	1190	1231	utr3
NM_001002116	1235	1313	utr3
NM_001002116	1450	1491	utr3
NM_001002116	1689	1730	utr3
NM_001002120	2067	2108	utr3
NM_001002121	1119	1190	cds
NM_001002121	1750	1823	utr3
NM_001002121	1843	1884	utr3
NM_001002121	1891	1932	utr3
NM_001002121	1937	1978	utr3
NM_001002121	1989	2030	utr3
NM_001002122	1654	1695	utr3
NM_001002123	465	506	cds
NM_001002123	588	629	cds
NM_001002123	669	710	cds
NM_001002124	871	912	utr3
NM_001002127	1243	1284	utr3
NM_001002130	1639	1680	utr3
NM_001002131	632	673	cds
NM_001002131	1076	1117	utr3
NM_001002131	1404	1445	utr3
NM_001002134	1208	1249	utr3
NM_001002137	575	616	utr3
NM_001002137	804	845	utr3
NM_001002139	558	599	utr3
NM_001002145	1410	1451	utr3
NM_001002145	1713	1754	utr3
NM_001002147	920	961	utr3
NM_001002149	1413	1454	utr3
NM_001002151	844	885	cds
NM_001002151	1382	1423	utr3
NM_001002151	1755	1796	utr3
NM_001002151	1857	1898	utr3
NM_001002151	1982	2023	utr3
NM_001002152	585	626	cds
NM_001002152	704	745	utr3
NM_001002152	1362	1403	utr3
NM_001002152	1509	1550	utr3
NM_001002152	1693	1734	utr3
NM_001002154	1842	1883	utr3
NM_001002157	1415	1456	utr3
NM_001002160	1266	1307	utr3
NM_001002161	40	81	utr5
NM_001002161	1673	1714	cds
NM_001002161	1853	1928	utr3
NM_001002162	1906	1947	utr3
NM_001002163	483	524	utr3
NM_001002164	292	333	cds
NM_001002164	1241	1282	cds
NM_001002164	1311	1352	utr3
NM_001002164	1371	1412	utr3
NM_001002164	1471	1512	utr3
NM_001002164	1550	1591	utr3
NM_001002165	1508	1549	utr3
NM_001002165	1624	1665	utr3
NM_001002165	2608	2649	utr3
NM_001002165	2985	3026	utr3
NM_001002166	4974	5050	utr3
NM_001002170	1389	1430	utr3
NM_001002170	1866	1907	utr3
NM_001002172	25	66	utr5
NM_001002172	1620	1661	utr3
NM_001002172	1686	1727	utr3
NM_001002179	1084	1125	cds
NM_001002179	1223	1291	utr3
NM_001002179	1314	1355	utr3
NM_001002179	1457	1498	utr3
NM_001002179	1609	1650	utr3
NM_001002179	1805	1846	utr3
NM_001002180	1954	1995	utr3
NM_001002180	2176	2217	utr3
NM_001002180	2410	2451	utr3
NM_001002180	2536	2577	utr3
NM_001002181	1298	1339	utr3
NM_001002181	2275	2316	utr3
NM_001002198	2169	2210	utr3
NM_001002199	567	608	utr3
NM_001002200	1116	1157	cds
NM_001002203	101	142	cds
NM_001002203	153	194	cds
NM_001002203	455	496	utr3
NM_001002203	569	610	utr3
NM_001002203	700	741	utr3
NM_001002204	1238	1279	utr3
NM_001002208	811	852	cds
NM_001002222	2155	2196	utr3
NM_001002222	2532	2573	utr3
NM_001002222	2587	2663	utr3
NM_001002222	2709	2750	utr3
NM_001002222	2798	2839	utr3
NM_001002222	3285	3326	utr3
NM_001002222	3457	3498	utr3
NM_001002222	3909	3950	utr3
NM_001002222	3964	4005	utr3
NM_001002222	4182	4223	utr3
NM_001002222	4232	4273	utr3
NM_001002222	4351	4392	utr3
NM_001002222	4469	4510	utr3
NM_001002222	4882	4923	utr3
NM_001002222	5430	5471	utr3
NM_001002222	5775	5816	utr3
NM_001002225	1345	1386	utr3
NM_001002226	982	1023	utr3
NM_001002298	1168	1209	utr3
NM_001002298	1255	1296	utr3
NM_001002298	1299	1340	utr3
NM_001002298	2541	2582	utr3
NM_001002298	3058	3099	utr3
NM_001002300	2156	2197	utr3
NM_001002300	2663	2704	utr3
NM_001002304	2048	2089	utr3
NM_001002314	509	550	cds
NM_001002315	271	312	utr5
NM_001002315	1472	1513	cds
NM_001002315	1750	1791	utr3
NM_001002315	2071	2112	utr3
NM_001002316	1836	1877	utr3
NM_001002316	1904	1945	utr3
NM_001002316	2039	2080	utr3
NM_001002319	1091	1132	cds
NM_001002319	1211	1252	utr3
NM_001002319	1856	1897	utr3
NM_001002320	947	988	utr3
NM_001002320	2054	2095	utr3
NM_001002320	2354	2395	utr3
NM_001002321	1030	1071	utr3
NM_001002321	1201	1242	utr3
NM_001002321	1277	1357	utr3
NM_001002323	1019	1060	utr3
NM_001002324	1576	1617	utr3
NM_001002330	1729	1770	utr3
NM_001002330	1823	1864	utr3
NM_001002330	2065	2106	utr3
NM_001002341	1355	1396	utr3
NM_001002351	1501	1542	utr3
NM_001002351	1619	1660	utr3
NM_001002353	1109	1150	utr3
NM_001002353	1245	1286	utr3
NM_001002355	2214	2255	utr3
NM_001002362	1291	1332	utr3
NM_001002364	779	854	utr3
NM_001002364	1054	1095	utr3
NM_001002364	1096	1137	utr3
NM_001002366	1267	1308	utr3
NM_001002375	491	532	cds
NM_001002375	1211	1280	utr3
NM_001002376	1485	1526	utr3
NM_001002376	1664	1705	utr3
NM_001002378	48	89	utr5
NM_001002378	113	154	utr5
NM_001002378	660	701	utr3
NM_001002378	813	854	utr3
NM_001002384	2428	2469	cds
NM_001002384	2626	2667	utr3
NM_001002387	1110	1151	utr3
NM_001002387	1371	1412	utr3
NM_001002387	1421	1462	utr3
NM_001002389	35	76	utr5
NM_001002402	659	700	utr3
NM_001002409	170	211	utr5
NM_001002409	227	268	utr5
NM_001002411	896	937	utr3
NM_001002415	1376	1417	utr3
NM_001002416	1174	1215	utr3
NM_001002419	2014	2055	cds
NM_001002419	2065	2106	cds
NM_001002419	2266	2307	utr3
NM_001002419	2427	2468	utr3
NM_001002419	2473	2514	utr3
NM_001002420	4481	4522	utr3
NM_001002422	947	988	utr3
NM_001002423	1412	1453	utr3
NM_001002427	504	545	utr3
NM_001002431	1206	1247	utr3
NM_001002435	453	494	cds
NM_001002435	1010	1051	utr3
NM_001002438	473	514	utr3
NM_001002440	438	479	utr3
NM_001002440	524	565	utr3
NM_001002440	705	746	utr3
NM_001002445	626	667	utr3
NM_001002445	716	757	utr3
NM_001002445	798	839	utr3
NM_001002445	869	910	utr3
NM_001002445	970	1011	utr3
NM_001002448	1300	1341	utr3
NM_001002448	1381	1460	utr3
NM_001002448	1470	1511	utr3
NM_001002451	1249	1290	utr3
NM_001002464	906	979	utr3
NM_001002465	578	648	utr3
NM_001002465	1110	1192	utr3
NM_001002466	1936	1977	cds
NM_001002468	966	1007	utr3
NM_001002470	1042	1083	utr3
NM_001002473	829	870	utr3
NM_001002473	1009	1050	utr3
NM_001002476	1245	1286	utr3
NM_001002477	690	731	utr3
NM_001002477	935	976	utr3
NM_001002478	588	629	utr3
NM_001002485	967	1008	utr3
NM_001002486	259	300	utr3
NM_001002488	759	800	utr3
NM_001002499	173	253	cds
NM_001002499	471	512	utr3
NM_001002500	1125	1166	utr3
NM_001002502	1114	1155	utr3
NM_001002503	1198	1239	utr3
NM_001002503	1395	1436	utr3
NM_001002503	2028	2069	utr3
NM_001002503	2303	2344	utr3
NM_001002504	8135	8176	utr3
NM_001002504	8243	8312	utr3
NM_001002504	8324	8365	utr3
NM_001002504	8402	8443	utr3
NM_001002504	8456	8497	utr3
NM_001002504	8572	8652	utr3
NM_001002505	509	550	utr3
NM_001002505	567	608	utr3
NM_001002505	636	677	utr3
NM_001002509	238	279	cds
NM_001002509	422	463	utr3
NM_001002512	404	445	cds
NM_001002517	1155	1196	utr3
NM_001002521	478	519	cds
NM_001002521	743	784	utr3
NM_001002521	917	958	utr3
NM_001002523	1116	1157	utr3
NM_001002525	663	704	cds
NM_001002525	714	755	cds
NM_001002525	781	822	cds
NM_001002525	847	888	cds
NM_001002525	1337	1378	utr3
NM_001002525	1379	1420	utr3
NM_001002527	325	366	utr5
NM_001002527	815	856	utr3
NM_001002527	859	900	utr3
NM_001002527	911	952	utr3
NM_001002535	420	461	cds
NM_001002540	254	295	cds
NM_001002540	918	985	utr3
NM_001002540	1026	1067	utr3
NM_001002540	1109	1150	utr3
NM_001002540	1265	1306	utr3
NM_001002543	986	1027	utr3
NM_001002544	618	694	utr3
NM_001002544	703	779	utr3
NM_001002546	1089	1130	utr3
NM_001002547	72	113	utr5
NM_001002547	728	769	cds
NM_001002547	1201	1242	utr3
NM_001002548	866	907	utr3
NM_001002551	346	387	cds
NM_001002551	919	960	utr3
NM_001002551	987	1028	utr3
NM_001002551	1351	1392	utr3
NM_001002551	1409	1450	utr3
NM_001002557	708	749	utr3
NM_001002557	814	855	utr3
NM_001002557	890	964	utr3
NM_001002565	1032	1073	utr3
NM_001002566	1254	1295	utr3
NM_001002567	1127	1168	utr3
NM_001002567	1496	1537	utr3
NM_001002568	1582	1623	utr3
NM_001002572	1058	1099	utr3
NM_001002573	927	968	utr3
NM_001002575	816	857	utr3
NM_001002575	898	939	utr3
NM_001002575	1052	1093	utr3
NM_001002578	1396	1465	utr3
NM_001002583	871	912	utr3
NM_001002583	940	981	utr3
NM_001002588	2625	2666	utr3
NM_001002592	1315	1356	utr3
NM_001002595	1255	1296	utr3
NM_001002596	1095	1136	utr3
NM_001002596	1398	1439	utr3
NM_001002598	772	813	utr3
NM_001002602	582	623	cds
NM_001002604	1164	1205	utr3
NM_001002604	1216	1257	utr3
NM_001002604	1420	1461	utr3
NM_001002606	1349	1390	utr3
NM_001002610	912	953	utr3
NM_001002610	1061	1102	utr3
NM_001002610	1104	1145	utr3
NM_001002610	1413	1454	utr3
NM_001002610	1613	1654	utr3
NM_001002610	1712	1792	utr3
NM_001002610	1970	2011	utr3
NM_001002610	2505	2546	utr3
NM_001002611	1370	1411	utr3
NM_001002613	1690	1731	utr3
NM_001002613	1774	1852	utr3
NM_001002616	2046	2087	utr3
NM_001002616	2179	2220	utr3
NM_001002625	1430	1471	cds
NM_001002628	15	56	utr5
NM_001002631	979	1020	cds
NM_001002632	972	1013	utr3
NM_001002632	1301	1342	utr3
NM_001002635	1636	1677	utr3
NM_001002635	1790	1831	utr3
NM_001002635	1851	1892	utr3
NM_001002635	1927	1968	utr3
NM_001002639	602	643	cds
NM_001002639	956	997	cds
NM_001002639	1512	1553	utr3
NM_001002639	1569	1610	utr3
NM_001002639	1736	1777	utr3
NM_001002651	2063	2104	cds
NM_001002651	2490	2531	utr3
NM_001002651	2559	2600	utr3
NM_001002656	2349	2390	utr3
NM_001002656	2500	2541	utr3
NM_001002656	2592	2633	utr3
NM_001002658	1189	1230	cds
NM_001002658	1337	1378	cds
NM_001002658	1715	1756	cds
NM_001002658	2146	2219	utr3
NM_001002658	2326	2367	utr3
NM_001002659	1256	1297	utr3
NM_001002660	16	57	utr5
NM_001002660	1608	1649	utr3
NM_001002660	2406	2447	utr3
NM_001002660	2469	2510	utr3
NM_001002660	2545	2586	utr3
NM_001002660	2602	2643	utr3
NM_001002660	2875	2916	utr3
NM_001002660	3009	3050	utr3
NM_001002665	2164	2205	utr3
NM_001002667	1549	1590	utr3
NM_001002667	1631	1672	utr3
NM_001002667	3552	3593	utr3
NM_001002667	4613	4654	utr3
NM_001002669	1292	1333	utr3
NM_001002669	1454	1495	utr3
NM_001002673	2623	2664	utr3
NM_001002673	2694	2735	utr3
NM_001002676	1848	1889	utr3
NM_001002676	2779	2820	utr3
NM_001002676	3302	3343	utr3
NM_001002676	3395	3436	utr3
NM_001002677	80	158	utr5
NM_001002677	343	384	cds
NM_001002677	471	512	utr3
NM_001002677	570	641	utr3
NM_001002678	774	815	utr3
NM_001002680	2371	2412	utr3
NM_001002684	1490	1531	cds
NM_001002684	1984	2064	utr3
NM_001002686	1112	1153	utr3
NM_001002688	106	147	utr5
NM_001002688	890	931	cds
NM_001002688	1185	1226	utr3
NM_001002688	1853	1894	utr3
NM_001002688	1898	1939	utr3
NM_001002688	2173	2214	utr3
NM_001002688	2387	2428	utr3
NM_001002691	376	417	cds
NM_001002691	550	591	cds
NM_001002691	1849	1890	utr3
NM_001002692	2187	2228	utr3
NM_001002697	778	819	utr3
NM_001002697	980	1021	utr3
NM_001002698	175	216	cds
NM_001002698	955	996	utr3
NM_001002700	1815	1856	utr3
NM_001002703	681	722	utr3
NM_001002703	770	811	utr3
NM_001002705	1757	1798	cds
NM_001002708	942	983	utr3
NM_001002708	1013	1054	utr3
NM_001002713	1925	1966	utr3
NM_001002714	1062	1103	utr3
NM_001002717	1663	1704	utr3
NM_001002717	1796	1837	utr3
NM_001002720	2011	2052	utr3
NM_001002720	2207	2248	utr3
NM_001002720	2365	2406	utr3
NM_001002722	1455	1496	utr3
NM_001002725	1573	1614	utr3
NM_001002726	3766	3807	utr3
NM_001002727	2005	2046	utr3
NM_001002728	2141	2182	utr3
NM_001002728	2763	2804	utr3
NM_001002731	1025	1104	cds
NM_001002731	1280	1321	utr3
NM_001002731	1701	1742	utr3
NM_001002733	1539	1580	utr3
NM_001002739	2639	2680	utr3
NM_001002748	190	231	utr5
NM_001002748	1262	1303	utr3
NM_001002748	1430	1471	utr3
NM_001002752	1005	1046	utr3
NM_001002864	914	955	cds
NM_001002865	819	860	cds
NM_001002865	890	931	utr3
NM_001002866	259	300	cds
NM_001002866	422	463	cds
NM_001002867	2314	2355	cds
NM_001002867	2880	2921	cds
NM_001002867	3042	3083	cds
NM_001002867	4959	5000	cds
NM_001002867	5175	5216	cds
NM_001002867	5332	5373	cds
NM_001002867	6099	6140	cds
NM_001002867	6450	6491	cds
NM_001002867	6730	6771	cds
NM_001002867	7056	7097	cds
NM_001002867	8217	8258	cds
NM_001002871	3982	4023	utr3
NM_001002872	136	177	cds
NM_001002872	1349	1390	utr3
NM_001002874	845	886	utr3
NM_001003412	2191	2232	utr3
NM_001003415	705	746	cds
NM_001003417	1508	1549	utr3
NM_001003418	422	463	cds
NM_001003418	689	730	utr3
NM_001003419	1170	1211	utr3
NM_001003419	1864	1905	utr3
NM_001003419	2303	2344	utr3
NM_001003420	1218	1259	utr3
NM_001003420	1416	1457	utr3
NM_001003422	283	324	cds
NM_001003422	521	562	utr3
NM_001003422	568	609	utr3
NM_001003422	884	925	utr3
NM_001003425	986	1027	cds
NM_001003425	1384	1425	utr3
NM_001003425	1759	1800	utr3
NM_001003429	391	432	cds
NM_001003429	535	576	cds
NM_001003429	728	769	utr3
NM_001003434	307	348	utr3
NM_001003437	648	755	cds
NM_001003437	913	954	utr3
NM_001003439	869	910	utr3
NM_001003439	1056	1097	utr3
NM_001003447	631	672	utr3
NM_001003449	606	647	cds
NM_001003449	921	962	utr3
NM_001003449	977	1018	utr3
NM_001003449	1072	1113	utr3
NM_001003449	1231	1349	utr3
NM_001003452	834	875	cds
NM_001003452	1149	1190	utr3
NM_001003463	1145	1186	utr3
NM_001003466	207	248	utr5
NM_001003466	1091	1161	cds
NM_001003466	1191	1232	cds
NM_001003466	1338	1379	utr3
NM_001003466	1429	1531	utr3
NM_001003466	1588	1629	utr3
NM_001003469	966	1007	utr3
NM_001003469	1095	1136	utr3
NM_001003470	1455	1496	cds
NM_001003476	1096	1137	utr3
NM_001003483	1028	1069	utr3
NM_001003483	1116	1157	utr3
NM_001003483	1192	1233	utr3
NM_001003484	2092	2133	utr3
NM_001003484	2228	2269	utr3
NM_001003484	2322	2363	utr3
NM_001003484	2385	2465	utr3
NM_001003493	1148	1189	utr3
NM_001003493	1486	1527	utr3
NM_001003504	1629	1670	utr3
NM_001003504	1880	1921	utr3
NM_001003507	717	758	cds
NM_001003509	1334	1375	cds
NM_001003510	1190	1231	utr3
NM_001003528	1511	1552	utr3
NM_001003528	1961	2002	utr3
NM_001003528	4317	4358	utr3
NM_001003530	59	100	utr5
NM_001003532	81	122	utr5
NM_001003532	389	430	utr5
NM_001003532	1292	1333	utr3
NM_001003532	1628	1669	utr3
NM_001003532	1722	1763	utr3
NM_001003543	1880	1921	utr3
NM_001003543	2048	2089	utr3
NM_001003547	5606	5647	utr3
NM_001003547	5992	6033	utr3
NM_001003547	6123	6164	utr3
NM_001003547	6223	6264	utr3
NM_001003548	814	855	utr3
NM_001003549	596	637	utr3
NM_001003549	728	769	utr3
NM_001003551	470	511	cds
NM_001003551	809	850	utr3
NM_001003562	1916	1987	utr3
NM_001003564	76	117	cds
NM_001003564	750	791	utr3
NM_001003575	799	840	cds
NM_001003576	1063	1104	utr3
NM_001003584	354	395	cds
NM_001003584	623	664	cds
NM_001003584	1016	1057	utr3
NM_001003585	1013	1054	utr3
NM_001003589	583	624	utr3
NM_001003589	682	723	utr3
NM_001003591	787	828	utr3
NM_001003593	722	798	utr3
NM_001003595	1981	2022	utr3
NM_001003598	777	818	utr3
NM_001003609	2946	2987	utr3
NM_001003609	3323	3364	utr3
NM_001003618	368	435	cds
NM_001003618	614	655	utr3
NM_001003618	692	771	utr3
NM_001003618	969	1010	utr3
NM_001003622	201	242	cds
NM_001003622	426	467	cds
NM_001003622	615	656	utr3
NM_001003622	1351	1392	utr3
NM_001003623	759	800	utr3
NM_001003623	907	948	utr3
NM_001003623	960	1001	utr3
NM_001003623	1230	1271	utr3
NM_001003623	1310	1351	utr3
NM_001003623	1379	1420	utr3
NM_001003623	1421	1462	utr3
NM_001003623	1571	1612	utr3
NM_001003623	1885	1926	utr3
NM_001003623	1928	1969	utr3
NM_001003623	2061	2102	utr3
NM_001003623	2195	2236	utr3
NM_001003628	1294	1369	utr3
NM_001003628	1461	1502	utr3
NM_001003631	875	916	utr3
NM_001003631	927	968	utr3
NM_001003631	1056	1097	utr3
NM_001003634	1930	1971	utr3
NM_001003640	454	495	cds
NM_001003640	1683	1724	utr3
NM_001003644	1279	1320	utr3
NM_001003645	1667	1708	cds
NM_001003645	1786	1827	utr3
NM_001003647	2147	2188	utr3
NM_001003648	1456	1497	utr3
NM_001003648	1731	1772	utr3
NM_001003648	1798	1839	utr3
NM_001003648	2121	2162	utr3
NM_001003648	2376	2417	utr3
NM_001003648	2491	2532	utr3
NM_001003650	935	976	utr3
NM_001003650	1022	1063	utr3
NM_001003728	760	801	utr3
NM_001003730	768	809	utr3
NM_001003730	1023	1064	utr3
NM_001003730	1259	1300	utr3
NM_001003730	1389	1430	utr3
NM_001003731	79	120	cds
NM_001003731	369	410	utr3
NM_001003731	430	471	utr3
NM_001003731	499	540	utr3
NM_001003731	864	905	utr3
NM_001003741	331	372	cds
NM_001003744	5663	5704	utr3
NM_001003752	1380	1421	utr3
NM_001003752	1651	1692	utr3
NM_001003756	370	411	cds
NM_001003756	918	989	utr3
NM_001003758	1065	1106	utr3
NM_001003758	1136	1177	utr3
NM_001003758	1372	1413	utr3
NM_001003758	1414	1455	utr3
NM_001003762	744	785	utr3
NM_001003762	1057	1098	utr3
NM_001003769	1548	1589	utr3
NM_001003769	1671	1712	utr3
NM_001003778	1093	1134	cds
NM_001003780	826	867	utr3
NM_001003780	1126	1167	utr3
NM_001003781	1189	1230	utr3
NM_001003781	1414	1455	utr3
NM_001003822	2242	2283	cds
NM_001003822	2603	2644	utr3
NM_001003822	2836	2877	utr3
NM_001003822	2969	3010	utr3
NM_001003822	3106	3147	utr3
NM_001003822	3149	3190	utr3
NM_001003830	711	752	cds
NM_001003830	2653	2694	utr3
NM_001003835	3596	3637	cds
NM_001003835	3650	3691	cds
NM_001003835	3774	3815	utr3
NM_001003835	4330	4371	utr3
NM_001003836	1977	2018	cds
NM_001003836	2193	2263	utr3
NM_001003836	2338	2379	utr3
NM_001003837	2614	2655	utr3
NM_001003838	512	553	cds
NM_001003840	542	583	cds
NM_001003840	717	758	cds
NM_001003840	775	816	cds
NM_001003840	997	1038	utr3
NM_001003842	998	1039	utr3
NM_001003844	857	898	cds
NM_001003846	205	246	utr5
NM_001003846	3739	3780	utr3
NM_001003846	3988	4029	utr3
NM_001003851	1407	1480	utr3
NM_001003852	1677	1718	utr3
NM_001003856	683	724	cds
NM_001003860	528	569	utr3
NM_001003860	618	659	utr3
NM_001003861	583	624	utr3
NM_001003862	1050	1091	utr3
NM_001003863	573	614	cds
NM_001003865	1177	1218	utr3
NM_001003866	121	162	cds
NM_001003866	1253	1294	utr3
NM_001003866	1501	1542	utr3
NM_001003868	258	299	cds
NM_001003868	531	572	utr3
NM_001003869	590	631	cds
NM_001003869	853	894	cds
NM_001003869	1293	1334	cds
NM_001003869	1448	1489	utr3
NM_001003870	103	144	cds
NM_001003870	1429	1470	cds
NM_001003870	2338	2379	cds
NM_001003870	2492	2533	cds
NM_001003870	3346	3387	utr3
NM_001003870	3392	3433	utr3
NM_001003870	3461	3502	utr3
NM_001003870	3542	3583	utr3
NM_001003870	3591	3632	utr3
NM_001003870	3823	3864	utr3
NM_001003870	3891	3932	utr3
NM_001003870	4084	4125	utr3
NM_001003870	4412	4453	utr3
NM_001003870	4661	4737	utr3
NM_001003875	315	356	cds
NM_001003875	1081	1122	cds
NM_001003875	1191	1232	cds
NM_001003875	1273	1314	cds
NM_001003875	1996	2037	utr3
NM_001003875	2039	2080	utr3
NM_001003875	2155	2196	utr3
NM_001003875	2250	2291	utr3
NM_001003875	2315	2356	utr3
NM_001003875	2397	2438	utr3
NM_001003878	995	1036	cds
NM_001003878	1168	1209	utr3
NM_001003878	1284	1325	utr3
NM_001003878	1498	1539	utr3
NM_001003878	1798	1839	utr3
NM_001003879	1302	1343	utr3
NM_001003883	2717	2758	cds
NM_001003884	496	537	cds
NM_001003887	3611	3652	cds
NM_001003887	4725	4766	cds
NM_001003887	5300	5341	cds
NM_001003887	5569	5610	cds
NM_001003887	5717	5758	cds
NM_001003887	5830	5871	cds
NM_001003888	345	386	utr3
NM_001003888	472	513	utr3
NM_001003889	822	863	utr3
NM_001003890	275	316	cds
NM_001003890	394	435	cds
NM_001003890	471	512	cds
NM_001003890	1175	1216	cds
NM_001003890	1275	1316	cds
NM_001003890	1620	1661	cds
NM_001003890	2219	2260	utr3
NM_001003944	865	906	cds
NM_001003980	1337	1378	utr3
NM_001003984	2776	2817	utr3
NM_001003988	2680	2721	utr3
NM_001003988	2796	2837	utr3
NM_001003991	1701	1742	utr3
NM_001003991	1796	1837	utr3
NM_001003994	1944	1985	cds
NM_001003994	2178	2219	cds
NM_001003994	2230	2271	cds
NM_001003994	2499	2540	cds
NM_001003994	3387	3428	utr3
NM_001003994	3504	3545	utr3
NM_001003994	3565	3606	utr3
NM_001003994	3654	3695	utr3
NM_001003994	3813	3854	utr3
NM_001003994	3868	3909	utr3
NM_001003994	3960	4001	utr3
NM_001003994	4006	4047	utr3
NM_001003996	2270	2311	utr3
NM_001003999	1454	1495	utr3
NM_001004000	2031	2072	utr3
NM_001004000	2323	2364	utr3
NM_001004001	1076	1117	utr3
NM_001004001	1133	1174	utr3
NM_001004001	1184	1225	utr3
NM_001004001	1747	1788	utr3
NM_001004002	1171	1212	utr3
NM_001004002	1296	1337	utr3
NM_001004002	1367	1408	utr3
NM_001004002	1640	1681	utr3
NM_001004002	1751	1792	utr3
NM_001004002	2041	2082	utr3
NM_001004002	2185	2226	utr3
NM_001004002	2274	2315	utr3
NM_001004002	2344	2385	utr3
NM_001004003	2957	2998	utr3
NM_001004003	3069	3110	utr3
NM_001004003	3146	3187	utr3
NM_001004006	545	586	utr3
NM_001004111	3794	3835	cds
NM_001004111	3957	3998	utr3
NM_001004111	4006	4047	utr3
NM_001004111	4167	4208	utr3
NM_001004111	4657	4698	utr3
NM_001004111	4824	4865	utr3
NM_001004117	1825	1866	utr3
NM_001004287	1535	1576	cds
NM_001004287	1894	1935	cds
NM_001004287	1985	2026	cds
NM_001004287	2155	2196	utr3
NM_001004287	2232	2273	utr3
NM_001004287	2294	2375	utr3
NM_001004287	2395	2436	utr3
NM_001004287	2650	2691	utr3
NM_001004288	3643	3684	utr3
NM_001004288	3754	3795	utr3
NM_001004288	3836	3877	utr3
NM_001004288	4741	4823	utr3
NM_001004288	5137	5178	utr3
NM_001004288	5340	5381	utr3
NM_001004289	1611	1652	cds
NM_001004289	1679	1720	utr3
NM_001004289	2039	2080	utr3
NM_001004295	34	75	utr5
NM_001004295	1567	1608	utr3
NM_001004295	1637	1678	utr3
NM_001004295	1679	1720	utr3
NM_001004295	1736	1777	utr3
NM_001004295	1782	1823	utr3
NM_001004295	2062	2103	utr3
NM_001004295	2362	2403	utr3
NM_001004295	2730	2771	utr3
NM_001004295	2790	2831	utr3
NM_001004295	2844	2885	utr3
NM_001004295	2916	2957	utr3
NM_001004295	3033	3074	utr3
NM_001004296	1122	1163	cds
NM_001004296	1938	1979	utr3
NM_001004296	2335	2376	utr3
NM_001004296	2466	2507	utr3
NM_001004296	2934	2975	utr3
NM_001004296	3502	3543	utr3
NM_001004494	648	689	cds
NM_001004494	833	874	cds
NM_001004494	1380	1421	cds
NM_001004494	1546	1587	cds
NM_001004494	1850	1891	cds
NM_001004494	1959	2029	utr3
NM_001004494	2214	2255	utr3
NM_001004499	2652	2693	utr3
NM_001004499	3193	3234	utr3
NM_001004517	2533	2574	utr3
NM_001004520	2518	2559	utr3
NM_001004527	1473	1514	utr3
NM_001004527	2039	2080	utr3
NM_001004527	2171	2212	utr3
NM_001004529	1092	1133	utr3
NM_001004529	1244	1285	utr3
NM_001004536	1015	1056	utr3
NM_001004551	1786	1827	utr3
NM_001004552	2720	2761	utr3
NM_001004552	2844	2885	utr3
NM_001004552	3217	3258	utr3
NM_001004552	3489	3530	utr3
NM_001004552	3597	3638	utr3
NM_001004553	755	796	utr3
NM_001004553	2239	2280	utr3
NM_001004554	2595	2636	utr3
NM_001004554	2788	2829	utr3
NM_001004555	787	828	utr3
NM_001004555	838	879	utr3
NM_001004555	1011	1052	utr3
NM_001004555	1056	1097	utr3
NM_001004555	1149	1190	utr3
NM_001004555	1481	1522	utr3
NM_001004557	701	742	cds
NM_001004560	1818	1859	utr3
NM_001004560	1872	1913	utr3
NM_001004560	2158	2199	utr3
NM_001004561	1038	1079	cds
NM_001004561	1388	1429	cds
NM_001004561	1639	1680	utr3
NM_001004561	1742	1783	utr3
NM_001004561	1970	2011	utr3
NM_001004573	1739	1780	utr3
NM_001004577	1819	1860	cds
NM_001004577	1938	1979	utr3
NM_001004577	2150	2191	utr3
NM_001004577	2296	2337	utr3
NM_001004578	1857	1898	utr3
NM_001004578	2542	2583	utr3
NM_001004580	1650	1691	utr3
NM_001004581	1873	1955	cds
NM_001004581	2569	2610	cds
NM_001004583	2086	2127	utr3
NM_001004588	1862	1903	utr3
NM_001004589	818	859	utr3
NM_001004589	1509	1580	utr3
NM_001004589	1602	1643	utr3
NM_001004589	1678	1719	utr3
NM_001004589	1778	1819	utr3
NM_001004589	2148	2189	utr3
NM_001004589	2750	2791	utr3
NM_001004592	167	208	cds
NM_001004592	359	400	cds
NM_001004592	2796	2837	cds
NM_001004592	2910	2951	utr3
NM_001004592	3037	3078	utr3
NM_001004593	426	467	cds
NM_001004593	814	855	utr3
NM_001004593	969	1010	utr3
NM_001004593	1037	1078	utr3
NM_001004593	1762	1839	utr3
NM_001004595	414	455	cds
NM_001004597	2999	3040	utr3
NM_001004600	1600	1641	cds
NM_001004600	2591	2632	utr3
NM_001004601	162	203	utr5
NM_001004601	475	516	cds
NM_001004601	612	653	cds
NM_001004601	672	713	cds
NM_001004601	821	862	cds
NM_001004601	1005	1046	cds
NM_001004601	1207	1248	utr3
NM_001004601	1265	1306	utr3
NM_001004601	1342	1420	utr3
NM_001004601	1461	1502	utr3
NM_001004601	1753	1794	utr3
NM_001004601	1961	2002	utr3
NM_001004601	2006	2080	utr3
NM_001004601	2157	2198	utr3
NM_001004601	2267	2308	utr3
NM_001004601	2382	2423	utr3
NM_001004601	2529	2570	utr3
NM_001004601	2727	2768	utr3
NM_001004601	2830	2871	utr3
NM_001004601	2903	2944	utr3
NM_001004601	2960	3001	utr3
NM_001004601	3034	3075	utr3
NM_001004601	3122	3163	utr3
NM_001004607	1275	1316	utr3
NM_001004626	641	682	cds
NM_001004633	1042	1083	utr3
NM_001004635	668	709	utr3
NM_001004635	944	985	utr3
NM_001004635	1031	1072	utr3
NM_001004639	640	681	cds
NM_001004640	1362	1403	utr3
NM_001004640	1443	1484	utr3
NM_001004641	979	1020	utr3
NM_001004642	2228	2269	utr3
NM_001004642	2357	2398	utr3
NM_001004642	2648	2689	utr3
NM_001004652	27	68	utr5
NM_001004652	146	187	cds
NM_001004652	462	503	utr3
NM_001004659	852	893	utr3
NM_001004664	2387	2428	utr3
NM_001004664	2459	2500	utr3
NM_001004664	2673	2714	utr3
NM_001004664	2716	2757	utr3
NM_001004664	2864	2942	utr3
NM_001004664	3012	3053	utr3
NM_001004664	3483	3524	utr3
NM_001004664	3629	3670	utr3
NM_001004665	547	588	utr3
NM_001004667	604	645	cds
NM_001004667	1252	1293	utr3
NM_001004667	1311	1352	utr3
NM_001004672	695	736	utr3
NM_001004672	1037	1078	utr3
NM_001004672	1667	1708	utr3
NM_001004672	1829	1870	utr3
NM_001004672	1949	1990	utr3
NM_001004672	2048	2089	utr3
NM_001004673	657	698	utr3
NM_001004673	785	826	utr3
NM_001004674	617	658	cds
NM_001004674	729	770	utr3
NM_001004674	832	873	utr3
NM_001004675	592	633	utr3
NM_001004677	614	655	utr3
NM_001004677	805	846	utr3
NM_001004683	624	665	cds
NM_001005300	359	400	cds
NM_001005306	1522	1563	utr3
NM_001005391	116	157	utr5
NM_001005391	4768	4809	cds
NM_001005391	5304	5345	utr3
NM_001005391	5368	5409	utr3
NM_001005391	5435	5476	utr3
NM_001005391	5478	5549	utr3
NM_001005391	5579	5620	utr3
NM_001005391	5778	5819	utr3
NM_001005391	6425	6466	utr3
NM_001005391	6472	6513	utr3
NM_001005395	1107	1148	cds
NM_001005395	1427	1468	cds
NM_001005395	2189	2230	cds
NM_001005395	2455	2496	utr3
NM_001005395	2730	2771	utr3
NM_001005395	2773	2814	utr3
NM_001005395	3264	3305	utr3
NM_001005395	3349	3390	utr3
NM_001005395	3867	3908	utr3
NM_001005395	4050	4091	utr3
NM_001005395	4153	4194	utr3
NM_001005395	4199	4240	utr3
NM_001005395	4304	4345	utr3
NM_001005401	1857	1898	utr3
NM_001005401	2057	2098	utr3
NM_001005401	2133	2213	utr3
NM_001005401	3116	3183	utr3
NM_001005401	3334	3375	utr3
NM_001005401	3420	3461	utr3
NM_001005401	3608	3649	utr3
NM_001005585	1053	1094	utr3
NM_001005587	2079	2120	utr3
NM_001005587	2288	2329	utr3
NM_001005589	790	831	utr3
NM_001005590	1844	1885	utr3
NM_001005590	2811	2852	utr3
NM_001005591	1088	1129	utr3
NM_001005591	1137	1178	utr3
NM_001005604	302	382	cds
NM_001005604	3600	3641	cds
NM_001005769	1376	1417	utr3
NM_001005769	1457	1498	utr3
NM_001005769	1793	1834	utr3
NM_001005770	6	47	utr5
NM_001005772	1025	1066	cds
NM_001005778	1611	1652	cds
NM_001005926	635	676	utr3
NM_001005926	777	818	utr3
NM_001005927	2578	2619	cds
NM_001005927	2950	2991	utr3
NM_001005927	3374	3415	utr3
NM_001005927	3574	3615	utr3
NM_001005929	28	69	utr5
NM_001005929	3695	3736	utr3
NM_001005931	1317	1358	utr3
NM_001005931	1534	1575	utr3
NM_001005931	1734	1775	utr3
NM_001005931	1786	1827	utr3
NM_001005931	2057	2098	utr3
NM_001005931	2140	2181	utr3
NM_001005934	1196	1237	utr3
NM_001005934	1278	1319	utr3
NM_001005934	1685	1726	utr3
NM_001005934	1958	1999	utr3
NM_001005934	2348	2389	utr3
NM_001005934	2400	2441	utr3
NM_001005936	1026	1067	cds
NM_001005936	1126	1167	cds
NM_001005936	1223	1264	cds
NM_001005936	1384	1425	cds
NM_001005936	1560	1601	cds
NM_001005937	2211	2252	cds
NM_001005937	2365	2406	cds
NM_001005937	2481	2522	cds
NM_001005937	2600	2641	cds
NM_001005937	2736	2777	cds
NM_001005937	2876	2917	cds
NM_001005941	680	721	utr3
NM_001005941	1004	1045	utr3
NM_001005941	1062	1103	utr3
NM_001005942	880	921	utr3
NM_001005950	1130	1171	utr3
NM_001005950	1319	1360	utr3
NM_001005951	936	977	utr3
NM_001005953	738	779	utr3
NM_001005955	569	610	utr3
NM_001005955	888	929	utr3
NM_001005967	431	472	cds
NM_001005967	505	546	utr3
NM_001005967	589	630	utr3
NM_001005967	631	707	utr3
NM_001005967	713	754	utr3
NM_001005967	857	898	utr3
NM_001005978	1242	1283	utr3
NM_001005983	1393	1434	utr3
NM_001005989	1682	1723	utr3
NM_001005994	1230	1271	utr3
NM_001005996	905	946	utr3
NM_001005996	1086	1127	utr3
NM_001006000	626	667	utr3
NM_001006000	922	963	utr3
NM_001006000	1107	1148	utr3
NM_001006002	1450	1491	utr3
NM_001006004	626	704	utr3
NM_001006013	502	543	utr3
NM_001006013	720	761	utr3
NM_001006016	1610	1651	utr3
NM_001006018	1042	1083	utr3
NM_001006018	1139	1180	utr3
NM_001006022	197	238	cds
NM_001006022	1227	1268	utr3
NM_001006029	885	926	utr3
NM_001006030	466	507	cds
NM_001006032	604	645	cds
NM_001006034	731	772	utr3
NM_001006035	600	641	utr3
NM_001006035	1022	1096	utr3
NM_001006037	1338	1379	utr3
NM_001006042	1675	1716	cds
NM_001006043	1076	1117	utr3
NM_001006043	1178	1219	utr3
NM_001006043	1258	1299	utr3
NM_001006043	1336	1377	utr3
NM_001006045	845	886	utr3
NM_001006045	1455	1496	utr3
NM_001006045	1706	1747	utr3
NM_001006045	1964	2005	utr3
NM_001006048	1002	1043	utr3
NM_001006052	819	860	cds
NM_001006052	1100	1141	utr3
NM_001006055	779	820	utr3
NM_001006055	834	875	utr3
NM_001006056	1540	1581	utr3
NM_001006057	987	1028	utr3
NM_001006082	596	637	utr3
NM_001006082	758	799	utr3
NM_001006082	960	1001	utr3
NM_001006082	1012	1053	utr3
NM_001006086	2060	2101	utr3
NM_001006087	1126	1167	utr3
NM_001006093	664	705	utr3
NM_001006098	1088	1170	utr3
NM_001006100	1163	1204	utr3
NM_001006103	1421	1462	utr3
NM_001006105	1167	1208	utr3
NM_001006105	1312	1353	utr3
NM_001006105	1425	1466	utr3
NM_001006663	989	1030	utr3
NM_001006663	1036	1077	utr3
NM_001006663	1580	1621	utr3
NM_001007030	4857	4898	utr3
NM_001007032	7118	7159	cds
NM_001007032	8056	8097	utr3
NM_001007032	9595	9636	utr3
NM_001007032	9860	9901	utr3
NM_001007038	4339	4380	utr3
NM_001007051	1521	1562	cds
NM_001007051	1665	1706	cds
NM_001007051	1883	1924	utr3
NM_001007051	2385	2426	utr3
NM_001007051	3057	3098	utr3
NM_001007051	3213	3254	utr3
NM_001007055	741	782	utr3
NM_001007055	847	888	utr3
NM_001007055	941	982	utr3
NM_001007055	1071	1112	utr3
NM_001007055	1157	1236	utr3
NM_001007055	1270	1311	utr3
NM_001007059	247	288	cds
NM_001007059	396	437	cds
NM_001007059	573	614	utr3
NM_001007059	779	820	utr3
NM_001007060	1717	1758	utr3
NM_001007060	1924	1965	utr3
NM_001007060	2277	2318	utr3
NM_001007060	2353	2394	utr3
NM_001007061	922	963	utr3
NM_001007061	1125	1166	utr3
NM_001007061	1260	1301	utr3
NM_001007066	3741	3782	utr3
NM_001007120	1888	1960	cds
NM_001007120	2581	2622	utr3
NM_001007120	2800	2841	utr3
NM_001007135	339	380	cds
NM_001007135	1785	1826	utr3
NM_001007135	1864	1905	utr3
NM_001007135	1923	1964	utr3
NM_001007135	1979	2020	utr3
NM_001007135	2288	2329	utr3
NM_001007135	2643	2684	utr3
NM_001007135	2736	2777	utr3
NM_001007135	2793	2834	utr3
NM_001007135	3100	3141	utr3
NM_001007136	1542	1583	cds
NM_001007136	1656	1697	cds
NM_001007136	2807	2848	cds
NM_001007136	2921	2962	utr3
NM_001007136	3022	3063	utr3
NM_001007136	3113	3154	utr3
NM_001007152	1622	1663	utr3
NM_001007153	813	854	cds
NM_001007161	915	956	utr3
NM_001007168	480	521	cds
NM_001007168	1042	1083	utr3
NM_001007175	1830	1871	cds
NM_001007175	4177	4218	cds
NM_001007183	1225	1266	cds
NM_001007183	1913	1954	utr3
NM_001007183	2133	2174	utr3
NM_001007183	2361	2402	utr3
NM_001007183	2429	2470	utr3
NM_001007186	627	668	cds
NM_001007186	863	904	utr3
NM_001007186	1154	1195	utr3
NM_001007207	1894	1935	utr3
NM_001007207	1975	2016	utr3
NM_001007290	1501	1542	utr3
NM_001007290	1693	1734	utr3
NM_001007290	1779	1820	utr3
NM_001007298	3275	3316	utr3
NM_001007300	126	167	cds
NM_001007306	1489	1530	cds
NM_001007306	1757	1798	utr3
NM_001007307	42	83	utr5
NM_001007307	563	604	cds
NM_001007307	1276	1317	cds
NM_001007307	4908	4949	utr3
NM_001007309	1353	1394	utr3
NM_001007309	1687	1728	utr3
NM_001007309	1981	2022	utr3
NM_001007313	1321	1362	cds
NM_001007313	1412	1453	cds
NM_001007313	1498	1568	utr3
NM_001007313	1604	1645	utr3
NM_001007313	1647	1688	utr3
NM_001007313	1804	1845	utr3
NM_001007313	1885	1926	utr3
NM_001007313	2152	2193	utr3
NM_001007313	2217	2258	utr3
NM_001007313	2427	2468	utr3
NM_001007313	2865	2906	utr3
NM_001007313	2933	2974	utr3
NM_001007313	3400	3441	utr3
NM_001007315	964	1005	cds
NM_001007315	2321	2362	utr3
NM_001007317	413	454	cds
NM_001007317	1295	1336	utr3
NM_001007318	640	681	cds
NM_001007318	2826	2867	utr3
NM_001007318	2902	2943	utr3
NM_001007318	3031	3072	utr3
NM_001007318	3103	3144	utr3
NM_001007318	3723	3764	utr3
NM_001007318	3860	3901	utr3
NM_001007318	3929	3970	utr3
NM_001007318	4015	4056	utr3
NM_001007319	3438	3479	utr3
NM_001007323	1884	1925	utr3
NM_001007323	2104	2145	utr3
NM_001007325	2267	2308	utr3
NM_001007327	1146	1187	cds
NM_001007327	1244	1285	utr3
NM_001007327	1682	1759	utr3
NM_001007327	1835	1876	utr3
NM_001007327	2320	2361	utr3
NM_001007327	2431	2472	utr3
NM_001007329	3852	3893	utr3
NM_001007329	4282	4323	utr3
NM_001007330	3202	3243	utr3
NM_001007330	3915	3994	utr3
NM_001007339	1416	1457	utr3
NM_001007340	1823	1864	utr3
NM_001007343	1571	1612	utr3
NM_001007345	1298	1339	utr3
NM_001007347	825	866	cds
NM_001007347	1231	1272	cds
NM_001007351	645	686	utr3
NM_001007351	946	987	utr3
NM_001007359	437	478	cds
NM_001007359	643	684	cds
NM_001007359	796	869	utr3
NM_001007359	992	1033	utr3
NM_001007359	1469	1510	utr3
NM_001007359	1738	1779	utr3
NM_001007361	977	1018	cds
NM_001007361	1162	1203	utr3
NM_001007361	1376	1417	utr3
NM_001007364	803	844	cds
NM_001007364	942	983	utr3
NM_001007364	1044	1085	utr3
NM_001007367	1503	1544	cds
NM_001007369	431	472	cds
NM_001007369	482	523	cds
NM_001007369	2531	2572	utr3
NM_001007369	2857	2898	utr3
NM_001007369	2913	2954	utr3
NM_001007370	629	670	cds
NM_001007370	1076	1117	utr3
NM_001007374	2174	2215	utr3
NM_001007375	636	677	utr3
NM_001007375	749	790	utr3
NM_001007375	828	869	utr3
NM_001007380	864	905	utr3
NM_001007381	1376	1417	utr3
NM_001007381	1450	1491	utr3
NM_001007381	1573	1614	utr3
NM_001007382	1083	1124	utr3
NM_001007382	1178	1219	utr3
NM_001007382	1221	1262	utr3
NM_001007382	1390	1431	utr3
NM_001007383	1053	1094	utr3
NM_001007384	1215	1256	utr3
NM_001007384	1415	1456	utr3
NM_001007392	835	876	utr3
NM_001007406	2170	2211	utr3
NM_001007410	773	814	cds
NM_001007410	2100	2141	cds
NM_001007410	2289	2330	utr3
NM_001007410	2405	2446	utr3
NM_001007410	2468	2509	utr3
NM_001007411	1516	1557	utr3
NM_001007411	1967	2008	utr3
NM_001007411	2084	2125	utr3
NM_001007416	1	42	utr5
NM_001007424	1156	1197	utr3
NM_001007424	1544	1585	utr3
NM_001007432	1538	1579	utr3
NM_001007433	106	147	utr5
NM_001007433	250	291	utr5
NM_001007433	320	361	cds
NM_001007433	1419	1460	cds
NM_001007433	1477	1548	cds
NM_001007434	1354	1395	utr3
NM_001007439	2171	2212	utr3
NM_001007439	2303	2344	utr3
NM_001007440	1203	1285	utr3
NM_001007440	1862	1903	utr3
NM_001007440	1907	1948	utr3
NM_001007440	2087	2128	utr3
NM_001007440	2182	2223	utr3
NM_001007440	2285	2326	utr3
NM_001007442	1647	1688	utr3
NM_001007442	2098	2139	utr3
NM_001007442	2145	2186	utr3
NM_001007446	1277	1318	cds
NM_001007446	1464	1505	utr3
NM_001007446	1669	1710	utr3
NM_001007446	1713	1754	utr3
NM_001007450	1329	1370	cds
NM_001007450	1863	1904	utr3
NM_001007452	338	379	utr3
NM_001007452	1021	1062	utr3
NM_001007453	1210	1251	utr3
NM_001007453	3223	3264	utr3
NM_001007455	1408	1449	utr3
NM_001007456	900	941	utr3
NM_001007456	1019	1060	utr3
NM_001007766	1635	1676	cds
NM_001007766	1761	1802	utr3
NM_001007766	1951	1992	utr3
NM_001007766	2116	2157	utr3
NM_001007767	1562	1603	cds
NM_001007767	2213	2254	utr3
NM_001007767	2316	2357	utr3
NM_001007767	2911	2952	utr3
NM_001007769	1377	1418	utr3
NM_001007770	849	890	utr3
NM_001007771	1560	1601	utr3
NM_001007771	2099	2177	utr3
NM_001007771	2297	2338	utr3
NM_001007773	1598	1639	utr3
NM_001007773	1904	1945	utr3
NM_001007773	2349	2390	utr3
NM_001007774	725	766	utr3
NM_001007774	782	823	utr3
NM_001007774	902	943	utr3
NM_001007774	1039	1080	utr3
NM_001007775	292	333	utr5
NM_001007775	427	468	utr5
NM_001007775	1433	1474	utr3
NM_001007775	1503	1544	utr3
NM_001007775	1569	1610	utr3
NM_001007775	1792	1833	utr3
NM_001007775	1899	1940	utr3
NM_001007777	695	736	utr3
NM_001007777	752	793	utr3
NM_001007777	943	984	utr3
NM_001008400	2418	2459	utr3
NM_001008402	3074	3115	utr3
NM_001008402	3196	3237	utr3
NM_001008575	2432	2473	utr3
NM_001008576	2432	2473	utr3
NM_001008578	1969	2010	utr3
NM_001008578	2224	2265	utr3
NM_001008578	2593	2634	utr3
NM_001008580	1073	1114	utr3
NM_001008580	1119	1160	utr3
NM_001008580	1259	1300	utr3
NM_001008580	1350	1391	utr3
NM_001008580	1638	1679	utr3
NM_001008580	1797	1838	utr3
NM_001008580	1960	2001	utr3
NM_001008581	1163	1204	utr3
NM_001008581	1226	1267	utr3
NM_001008581	1377	1418	utr3
NM_001008581	1458	1499	utr3
NM_001008581	1523	1564	utr3
NM_001008581	1622	1663	utr3
NM_001008581	1685	1726	utr3
NM_001008581	1790	1831	utr3
NM_001008581	1844	1885	utr3
NM_001008581	1916	1957	utr3
NM_001008581	1977	2018	utr3
NM_001008581	2050	2166	utr3
NM_001008581	2181	2222	utr3
NM_001008581	2239	2280	utr3
NM_001008581	2928	2969	utr3
NM_001008600	1405	1446	utr3
NM_001008602	696	737	cds
NM_001008602	826	867	cds
NM_001008602	1151	1192	utr3
NM_001008603	1338	1379	cds
NM_001008603	1493	1534	utr3
NM_001008605	5	46	utr5
NM_001008605	915	956	utr3
NM_001008605	1279	1320	utr3
NM_001008605	1438	1511	utr3
NM_001008605	1601	1642	utr3
NM_001008605	1726	1767	utr3
NM_001008605	1855	1896	utr3
NM_001008606	1271	1312	utr3
NM_001008609	783	824	cds
NM_001008609	1102	1143	utr3
NM_001008609	1158	1232	utr3
NM_001008609	1290	1331	utr3
NM_001008609	1419	1460	utr3
NM_001008609	1550	1591	utr3
NM_001008611	1068	1109	utr3
NM_001008612	1594	1635	cds
NM_001008615	612	653	cds
NM_001008615	732	773	utr3
NM_001008615	820	861	utr3
NM_001008624	2409	2450	cds
NM_001008624	3155	3228	utr3
NM_001008624	3449	3490	utr3
NM_001008627	1578	1619	utr3
NM_001008627	1694	1735	utr3
NM_001008627	1805	1846	utr3
NM_001008627	1948	2020	utr3
NM_001008627	2208	2249	utr3
NM_001008627	2309	2350	utr3
NM_001008634	946	987	cds
NM_001008634	989	1030	utr3
NM_001008634	1066	1107	utr3
NM_001008634	1241	1282	utr3
NM_001008635	1401	1442	cds
NM_001008643	864	905	utr3
NM_001008644	230	271	utr5
NM_001008644	2385	2426	utr3
NM_001008644	2538	2579	utr3
NM_001008644	2735	2776	utr3
NM_001008644	2793	2834	utr3
NM_001008644	2862	2903	utr3
NM_001008644	2942	2983	utr3
NM_001008644	3158	3199	utr3
NM_001008644	3215	3256	utr3
NM_001008644	3426	3467	utr3
NM_001008644	3607	3648	utr3
NM_001008644	3873	3914	utr3
NM_001008644	4034	4075	utr3
NM_001008646	314	355	cds
NM_001008650	2361	2402	utr3
NM_001008650	2484	2525	utr3
NM_001008650	2594	2635	utr3
NM_001008650	2772	2813	utr3
NM_001008651	1137	1178	utr3
NM_001008653	1270	1311	utr3
NM_001008732	1705	1746	utr3
NM_001008732	2128	2169	utr3
NM_001008732	2210	2251	utr3
NM_001008732	2268	2309	utr3
NM_001008732	2374	2415	utr3
NM_001009596	854	895	cds
NM_001009889	1690	1731	cds
NM_001009889	1865	1906	utr3
NM_001009889	1932	1973	utr3
NM_001009889	2113	2154	utr3
NM_001009898	645	686	utr3
NM_001009898	815	856	utr3
NM_001009902	889	968	utr3
NM_001009914	995	1036	utr3
NM_001009914	1741	1838	utr3
NM_001009914	2206	2247	utr3
NM_001009987	1036	1077	utr3
NM_001009988	4140	4213	utr3
NM_001009989	1637	1678	utr3
NM_001009989	2229	2270	utr3
NM_001009989	2325	2366	utr3
NM_001009989	2576	2617	utr3
NM_001009989	2662	2703	utr3
NM_001009989	2779	2820	utr3
NM_001009989	2999	3040	utr3
NM_001009990	1946	1987	utr3
NM_001012250	884	925	utr3
NM_001012250	1449	1490	utr3
NM_001012304	2317	2358	utr3
NM_001012313	2236	2277	utr3
NM_001012313	2540	2581	utr3
NM_001012316	121	162	cds
NM_001012316	319	360	cds
NM_001012366	1773	1814	utr3
NM_001012366	1909	1950	utr3
NM_001012366	2046	2087	utr3
NM_001012366	2136	2177	utr3
NM_001012366	2273	2314	utr3
NM_001012366	2527	2568	utr3
NM_001012369	1203	1244	cds
NM_001012369	1434	1475	cds
NM_001012369	1498	1539	cds
NM_001012373	1976	2044	utr3
NM_001012383	1167	1208	cds
NM_001012383	1955	1996	utr3
NM_001012386	1044	1085	utr3
NM_001012386	1147	1188	utr3
NM_001012388	2440	2481	cds
NM_001012483	523	564	utr3
NM_001012485	1651	1692	utr3
NM_001012485	1799	1840	utr3
NM_001012485	1874	1915	utr3
NM_001012487	514	555	cds
NM_001012487	659	700	cds
NM_001012487	2847	2928	utr3
NM_001012487	3081	3122	utr3
NM_001012487	3207	3248	utr3
NM_001012487	3489	3569	utr3
NM_001012487	3642	3683	utr3
NM_001012487	3967	4008	utr3
NM_001012487	4206	4247	utr3
NM_001012487	4522	4563	utr3
NM_001012489	2325	2366	utr3
NM_001012493	931	972	utr3
NM_001012496	1447	1488	utr3
NM_001012497	954	995	utr3
NM_001012497	1494	1535	utr3
NM_001013260	692	733	utr3
NM_001013260	766	843	utr3
NM_001013260	871	912	utr3
NM_001013260	1108	1149	utr3
NM_001013260	1213	1254	utr3
NM_001013263	1086	1127	cds
NM_001013263	1133	1174	cds
NM_001013265	656	697	cds
NM_001013265	752	793	cds
NM_001013265	938	1042	cds
NM_001013266	617	658	cds
NM_001013266	719	760	cds
NM_001013266	1207	1248	cds
NM_001013266	2101	2142	cds
NM_001013266	2327	2368	utr3
NM_001013266	3555	3596	utr3
NM_001013266	3718	3759	utr3
NM_001013270	2232	2273	utr3
NM_001013270	2274	2315	utr3
NM_001013270	2383	2424	utr3
NM_001013270	2460	2501	utr3
NM_001013270	2591	2632	utr3
NM_001013270	2878	2919	utr3
NM_001013270	3138	3179	utr3
NM_001013270	3220	3261	utr3
NM_001013270	3850	3891	utr3
NM_001013270	4471	4512	utr3
NM_001013271	1301	1342	cds
NM_001013272	2002	2043	utr3
NM_001013273	1223	1264	cds
NM_001013273	1291	1332	cds
NM_001013273	2919	3024	utr3
NM_001013273	3085	3126	utr3
NM_001013273	3166	3207	utr3
NM_001013273	3349	3390	utr3
NM_001013273	3406	3447	utr3
NM_001013273	3451	3492	utr3
NM_001013273	3547	3588	utr3
NM_001013278	2208	2249	cds
NM_001013278	2595	2636	utr3
NM_001013278	2891	2932	utr3
NM_001013278	3095	3136	utr3
NM_001013293	393	434	utr3
NM_001013293	822	863	utr3
NM_001013298	1873	1914	utr3
NM_001013300	966	1007	cds
NM_001013300	2220	2261	cds
NM_001013300	2387	2428	utr3
NM_001013303	1109	1183	utr3
NM_001013303	1372	1413	utr3
NM_001013303	1446	1487	utr3
NM_001013303	1751	1792	utr3
NM_001013305	1248	1289	utr3
NM_001013305	1315	1356	utr3
NM_001013309	2191	2232	utr3
NM_001013309	2413	2454	utr3
NM_001013310	3928	3969	utr3
NM_001013316	839	880	utr3
NM_001013326	1160	1201	utr3
NM_001013326	1412	1453	utr3
NM_001013341	1078	1119	utr3
NM_001013344	416	457	utr3
NM_001013344	705	746	utr3
NM_001013345	839	880	utr3
NM_001013349	1162	1203	utr3
NM_001013349	1433	1474	utr3
NM_001013349	1483	1524	utr3
NM_001013351	2205	2246	utr3
NM_001013351	2254	2295	utr3
NM_001013351	2374	2415	utr3
NM_001013351	2473	2514	utr3
NM_001013352	1157	1198	utr3
NM_001013352	1225	1266	utr3
NM_001013352	1617	1658	utr3
NM_001013443	197	238	utr5
NM_001013443	480	521	cds
NM_001013443	1783	1824	cds
NM_001013443	1862	1903	cds
NM_001013443	3038	3079	utr3
NM_001013443	3083	3154	utr3
NM_001013443	3195	3236	utr3
NM_001013443	3331	3372	utr3
NM_001013443	3896	3937	utr3
NM_001013443	3967	4008	utr3
NM_001013445	1474	1515	utr3
NM_001013445	2037	2078	utr3
NM_001013445	2298	2339	utr3
NM_001013453	1252	1293	utr3
NM_001013454	688	729	cds
NM_001013457	958	999	utr3
NM_001013459	1252	1293	utr3
NM_001013469	720	761	utr3
NM_001013469	1119	1160	utr3
NM_001013471	1038	1079	utr3
NM_001013474	1266	1307	utr3
NM_001013477	436	477	cds
NM_001013479	1078	1146	utr3
NM_001013482	977	1018	utr3
NM_001013484	286	327	cds
NM_001013484	515	556	cds
NM_001013484	897	938	utr3
NM_001013490	1217	1258	cds
NM_001013490	1410	1451	utr3
NM_001013490	1464	1505	utr3
NM_001013490	1577	1618	utr3
NM_001013490	1654	1695	utr3
NM_001013490	2021	2062	utr3
NM_001013499	1479	1520	utr3
NM_001013500	9830	9871	utr3
NM_001013505	1418	1459	utr3
NM_001013515	1649	1718	utr3
NM_001013515	1852	1893	utr3
NM_001013518	1181	1222	utr3
NM_001013519	1070	1111	cds
NM_001013520	2647	2688	utr3
NM_001013521	10	51	utr5
NM_001013521	116	157	utr5
NM_001013521	2190	2231	utr3
NM_001013521	2728	2769	utr3
NM_001013521	2817	2858	utr3
NM_001013521	2874	2915	utr3
NM_001013521	2948	2989	utr3
NM_001013521	3619	3660	utr3
NM_001013521	4194	4235	utr3
NM_001013528	802	843	utr3
NM_001013528	1135	1176	utr3
NM_001013529	1188	1229	utr3
NM_001013531	1435	1476	utr3
NM_001013533	216	257	cds
NM_001013533	315	356	cds
NM_001013533	381	422	cds
NM_001013533	456	497	cds
NM_001013533	872	913	cds
NM_001013533	945	986	cds
NM_001013533	1165	1245	utr3
NM_001013533	1316	1357	utr3
NM_001013533	1372	1413	utr3
NM_001013533	1501	1542	utr3
NM_001013533	1811	1852	utr3
NM_001013533	1854	1927	utr3
NM_001013533	1992	2033	utr3
NM_001013533	2042	2083	utr3
NM_001013533	2126	2167	utr3
NM_001013533	2227	2268	utr3
NM_001013533	2316	2357	utr3
NM_001013536	166	207	utr5
NM_001013536	970	1011	utr3
NM_001013538	2545	2586	cds
NM_001013538	2604	2645	utr3
NM_001013538	2694	2735	utr3
NM_001013538	2774	2850	utr3
NM_001013538	3069	3110	utr3
NM_001013538	3192	3273	utr3
NM_001013538	3293	3374	utr3
NM_001013538	3447	3488	utr3
NM_001013541	1341	1382	utr3
NM_001013542	1191	1232	utr3
NM_001013542	1288	1329	utr3
NM_001013542	1573	1614	utr3
NM_001013542	1765	1806	utr3
NM_001013542	1809	1850	utr3
NM_001013542	1857	1898	utr3
NM_001013542	2615	2656	utr3
NM_001013542	2663	2704	utr3
NM_001013545	775	816	utr3
NM_001013546	634	675	cds
NM_001013552	973	1014	utr3
NM_001013554	582	623	utr3
NM_001013555	2658	2699	utr3
NM_001013566	780	821	cds
NM_001013568	2011	2052	utr3
NM_001013572	1916	1984	utr3
NM_001013573	1877	1918	utr3
NM_001013573	2229	2270	utr3
NM_001014289	21	62	utr5
NM_001014289	82	123	utr5
NM_001014289	372	413	cds
NM_001014289	2555	2596	cds
NM_001014289	2724	2765	cds
NM_001014289	2908	2949	utr3
NM_001014289	3372	3413	utr3
NM_001014289	3432	3473	utr3
NM_001014289	3517	3558	utr3
NM_001014289	3572	3613	utr3
NM_001014289	3642	3683	utr3
NM_001014289	3736	3816	utr3
NM_001014290	2165	2206	utr3
NM_001014290	2453	2494	utr3
NM_001014301	2550	2591	utr3
NM_001014301	2596	2637	utr3
NM_001014303	1719	1760	utr3
NM_001014304	1998	2039	utr3
NM_001014304	2297	2338	utr3
NM_001014309	1366	1407	cds
NM_001014309	1484	1525	utr3
NM_001014309	1824	1896	utr3
NM_001014322	2275	2344	utr3
NM_001014323	2324	2365	utr3
NM_001014324	1523	1564	cds
NM_001014324	1577	1618	utr3
NM_001014324	1720	1761	utr3
NM_001014332	2966	3007	utr3
NM_001014332	3091	3132	utr3
NM_001014332	3240	3281	utr3
NM_001014334	2000	2041	cds
NM_001014334	2652	2693	cds
NM_001014343	928	969	cds
NM_001014343	1509	1550	utr3
NM_001014343	1622	1663	utr3
NM_001014343	1758	1799	utr3
NM_001014345	1868	1909	utr3
NM_001014345	2100	2141	utr3
NM_001014346	1502	1543	utr3
NM_001014346	1690	1731	utr3
NM_001014346	1809	1850	utr3
NM_001014346	2249	2290	utr3
NM_001014350	2134	2175	utr3
NM_001014350	2529	2570	utr3
NM_001014351	1702	1743	utr3
NM_001014352	1038	1079	utr3
NM_001014352	1438	1479	utr3
NM_001014352	1489	1530	utr3
NM_001014361	154	195	cds
NM_001014362	165	206	utr5
NM_001014370	2431	2472	utr3
NM_001014370	2499	2540	utr3
NM_001014370	2577	2618	utr3
NM_001015060	72	113	utr5
NM_001015060	159	200	utr5
NM_001015060	214	255	utr5
NM_001015060	905	946	cds
NM_001015060	998	1039	utr3
NM_001015060	1059	1100	utr3
NM_001015060	1124	1165	utr3
NM_001015060	1182	1223	utr3
NM_001015060	1235	1276	utr3
NM_001015060	1305	1346	utr3
NM_001015060	1594	1635	utr3
NM_001015060	1766	1842	utr3
NM_001015060	1847	1888	utr3
NM_001015068	1039	1080	cds
NM_001015068	1173	1214	utr3
NM_001015068	1349	1416	utr3
NM_001017359	1436	1477	cds
NM_001017400	536	577	cds
NM_001017400	640	681	utr3
NM_001017400	898	978	utr3
NM_001017400	1124	1165	utr3
NM_001017545	2064	2105	utr3
NM_001017545	2420	2461	utr3
NM_001017551	998	1039	utr3
NM_001017552	1873	1914	utr3
NM_001017554	1831	1872	utr3
NM_001017554	1912	1981	utr3
NM_001017555	1393	1472	utr3
NM_001017555	1516	1557	utr3
NM_001017555	1709	1750	utr3
NM_001017555	2308	2349	utr3
NM_001017555	2769	2840	utr3
NM_001017555	3117	3158	utr3
NM_001017565	870	911	utr3
NM_001017565	945	986	utr3
NM_001017565	1019	1060	utr3
NM_001017574	400	441	cds
NM_001017574	665	706	cds
NM_001017574	1402	1443	utr3
NM_001017574	1493	1534	utr3
NM_001017574	1585	1626	utr3
NM_001017582	588	629	utr3
NM_001017582	634	707	utr3
NM_001017584	1109	1150	utr3
NM_001017585	891	932	utr3
NM_001017589	986	1027	utr3
NM_001017589	1061	1102	utr3
NM_001017593	34	75	utr5
NM_001017593	427	509	cds
NM_001017593	568	609	cds
NM_001017593	702	774	cds
NM_001017593	1072	1113	utr3
NM_001017593	1222	1263	utr3
NM_001017599	768	809	utr3
NM_001017609	1070	1111	utr3
NM_001017614	1525	1566	utr3
NM_001017614	1579	1620	utr3
NM_001017617	1319	1360	utr3
NM_001017617	1755	1796	utr3
NM_001017617	1894	1935	utr3
NM_001017617	1949	1990	utr3
NM_001017618	1201	1242	utr3
NM_001017619	1029	1070	utr3
NM_001017620	561	602	utr3
NM_001017620	693	734	utr3
NM_001017621	1579	1620	utr3
NM_001017627	966	1007	utr3
NM_001017627	1065	1106	utr3
NM_001017628	1299	1340	cds
NM_001017632	1023	1064	utr3
NM_001017632	1302	1343	utr3
NM_001017632	1498	1539	utr3
NM_001017632	1570	1742	utr3
NM_001017632	1812	1853	utr3
NM_001017633	1722	1763	cds
NM_001017633	1764	1805	utr3
NM_001017633	1832	1873	utr3
NM_001017633	1874	1915	utr3
NM_001017634	1461	1502	utr3
NM_001017634	1597	1638	utr3
NM_001017636	1413	1454	utr3
NM_001017637	1886	1927	utr3
NM_001017639	1188	1229	utr3
NM_001017642	1700	1741	utr3
NM_001017642	1932	1973	utr3
NM_001017643	1487	1528	utr3
NM_001017654	1325	1366	cds
NM_001017655	1569	1610	utr3
NM_001017655	1619	1660	utr3
NM_001017655	1708	1749	utr3
NM_001017660	1206	1247	utr3
NM_001017665	495	536	cds
NM_001017665	1781	1822	utr3
NM_001017667	1611	1652	utr3
NM_001017669	1498	1539	utr3
NM_001017671	941	982	utr3
NM_001017680	1624	1665	utr3
NM_001017688	1577	1618	utr3
NM_001017690	747	788	utr3
NM_001017700	160	201	cds
NM_001017700	228	269	cds
NM_001017700	482	523	cds
NM_001017700	567	636	utr3
NM_001017718	1087	1128	cds
NM_001017718	2092	2133	utr3
NM_001017718	2141	2182	utr3
NM_001017718	2260	2301	utr3
NM_001017718	2493	2534	utr3
NM_001017718	2588	2629	utr3
NM_001017718	2670	2711	utr3
NM_001017718	3763	3804	utr3
NM_001017729	774	815	utr3
NM_001017735	1242	1283	utr3
NM_001017739	93	134	cds
NM_001017739	229	270	cds
NM_001017739	388	429	cds
NM_001017739	788	829	utr3
NM_001017745	867	908	cds
NM_001017745	3356	3397	utr3
NM_001017747	696	737	cds
NM_001017747	852	893	utr3
NM_001017748	676	717	utr3
NM_001017752	527	568	cds
NM_001017752	1367	1408	cds
NM_001017752	1419	1491	utr3
NM_001017752	1808	1849	utr3
NM_001017764	1830	1910	utr3
NM_001017764	1978	2019	utr3
NM_001017764	2183	2224	utr3
NM_001017765	1337	1378	utr3
NM_001017766	108	149	utr5
NM_001017769	330	371	cds
NM_001017769	980	1021	utr3
NM_001017769	1040	1081	utr3
NM_001017770	2063	2104	utr3
NM_001017773	973	1014	cds
NM_001017777	1481	1522	utr3
NM_001017781	1440	1481	utr3
NM_001017797	467	508	cds
NM_001017797	688	729	utr3
NM_001017797	886	927	utr3
NM_001017797	943	1015	utr3
NM_001017797	1021	1062	utr3
NM_001017797	1104	1145	utr3
NM_001017797	1266	1307	utr3
NM_001017798	1638	1679	utr3
NM_001017798	1777	1818	utr3
NM_001017801	868	909	utr3
NM_001017802	151	192	utr5
NM_001017802	1331	1372	utr3
NM_001017802	1823	1905	utr3
NM_001017812	988	1029	utr3
NM_001017812	1044	1085	utr3
NM_001017812	1167	1208	utr3
NM_001017812	1278	1319	utr3
NM_001017815	975	1016	utr3
NM_001017815	1107	1148	utr3
NM_001017817	1874	1915	utr3
NM_001017817	2382	2423	utr3
NM_001017819	2004	2045	utr3
NM_001017830	209	250	utr5
NM_001017830	1670	1711	utr3
NM_001017831	991	1032	utr3
NM_001017837	951	992	cds
NM_001017839	200	241	utr5
NM_001017839	697	738	cds
NM_001017839	1784	1825	utr3
NM_001017844	1008	1049	utr3
NM_001017844	1054	1095	utr3
NM_001017851	609	650	cds
NM_001017851	743	784	utr3
NM_001017851	1002	1043	utr3
NM_001017851	1353	1394	utr3
NM_001017851	1396	1437	utr3
[truncated: 12,097 more rows]

## Sheet: iCLIP 6hpf
TransID	start(0-based)	end(0-based)	region
NM_001001402	2669	2710	utr3
NM_001001404	942	983	utr3
NM_001001404	984	1025	utr3
NM_001001404	1034	1075	utr3
NM_001001404	1119	1160	utr3
NM_001001404	1270	1311	utr3
NM_001001590	866	907	cds
NM_001001590	1309	1350	utr3
NM_001001724	553	594	utr3
NM_001001724	693	734	utr3
NM_001001724	1204	1245	utr3
NM_001001729	913	954	utr3
NM_001001729	1258	1299	utr3
NM_001001729	1604	1645	utr3
NM_001001729	1899	1940	utr3
NM_001001729	2298	2339	utr3
NM_001001729	2343	2384	utr3
NM_001001811	1078	1119	utr3
NM_001001811	1335	1376	utr3
NM_001001811	1459	1536	utr3
NM_001001811	1595	1636	utr3
NM_001001811	1665	1706	utr3
NM_001001811	1708	1749	utr3
NM_001001818	1827	1868	utr3
NM_001001818	1877	1918	utr3
NM_001001818	2102	2143	utr3
NM_001001818	2238	2279	utr3
NM_001001818	2395	2436	utr3
NM_001001818	2524	2565	utr3
NM_001001819	443	484	utr3
NM_001001820	12	53	utr5
NM_001001820	136	177	utr5
NM_001001820	235	276	utr5
NM_001001820	278	319	cds
NM_001001820	1018	1059	cds
NM_001001820	1146	1187	cds
NM_001001820	1531	1572	utr3
NM_001001820	1682	1759	utr3
NM_001001820	1859	1900	utr3
NM_001001820	1948	1989	utr3
NM_001001820	2015	2093	utr3
NM_001001820	2135	2176	utr3
NM_001001822	1335	1376	cds
NM_001001822	1424	1465	cds
NM_001001822	1711	1752	cds
NM_001001822	1787	1828	utr3
NM_001001822	1855	1896	utr3
NM_001001822	1919	1960	utr3
NM_001001822	1974	2015	utr3
NM_001001830	1737	1778	utr3
NM_001001830	1875	1916	utr3
NM_001001830	2427	2468	utr3
NM_001001830	3044	3085	utr3
NM_001001830	3096	3137	utr3
NM_001001838	764	805	cds
NM_001001838	823	864	utr3
NM_001001844	173	214	cds
NM_001001844	627	668	cds
NM_001001844	816	857	cds
NM_001001844	962	1003	cds
NM_001001844	1683	1724	cds
NM_001001844	1818	1859	cds
NM_001001844	1866	1907	cds
NM_001001844	2022	2063	cds
NM_001001844	2157	2198	cds
NM_001001844	2246	2287	cds
NM_001001844	2616	2657	utr3
NM_001001844	2800	2841	utr3
NM_001001844	2886	2927	utr3
NM_001001844	3181	3222	utr3
NM_001001844	3275	3316	utr3
NM_001001844	3371	3412	utr3
NM_001001844	3459	3500	utr3
NM_001001844	3727	3768	utr3
NM_001001844	3890	3931	utr3
NM_001001844	3961	4002	utr3
NM_001001844	4015	4056	utr3
NM_001001844	4130	4171	utr3
NM_001001886	3428	3469	utr3
NM_001001886	3542	3623	utr3
NM_001001886	3767	3808	utr3
NM_001001886	3859	3900	utr3
NM_001001886	3922	3963	utr3
NM_001001886	4001	4042	utr3
NM_001001889	690	731	cds
NM_001001940	2686	2727	cds
NM_001001940	2836	2877	cds
NM_001001940	2950	2991	utr3
NM_001001940	3116	3157	utr3
NM_001001941	3958	3999	utr3
NM_001001941	4028	4069	utr3
NM_001001943	2733	2774	utr3
NM_001001943	2827	2894	utr3
NM_001001943	2998	3039	utr3
NM_001001943	3137	3178	utr3
NM_001001943	3362	3403	utr3
NM_001001943	3623	3692	utr3
NM_001001943	4125	4166	utr3
NM_001001943	4334	4375	utr3
NM_001001944	545	586	cds
NM_001001944	2150	2191	cds
NM_001001944	3015	3056	cds
NM_001001944	3084	3125	utr3
NM_001001944	3192	3233	utr3
NM_001001944	3340	3381	utr3
NM_001001944	3443	3484	utr3
NM_001001944	3748	3789	utr3
NM_001001948	1434	1475	cds
NM_001001948	1541	1582	cds
NM_001001950	187	228	utr5
NM_001001950	1635	1676	utr3
NM_001001950	1734	1775	utr3
NM_001001950	1853	1894	utr3
NM_001001950	1923	1964	utr3
NM_001001950	2549	2590	utr3
NM_001002013	3070	3111	utr3
NM_001002037	993	1034	cds
NM_001002037	1073	1114	cds
NM_001002037	1202	1243	cds
NM_001002040	522	563	cds
NM_001002040	886	927	utr3
NM_001002040	952	993	utr3
NM_001002040	1014	1055	utr3
NM_001002040	1092	1133	utr3
NM_001002041	1004	1045	cds
NM_001002041	2075	2145	cds
NM_001002041	2286	2354	cds
NM_001002042	2498	2539	cds
NM_001002042	3618	3659	cds
NM_001002042	3699	3779	cds
NM_001002050	881	922	cds
NM_001002050	965	1006	utr3
NM_001002050	1008	1087	utr3
NM_001002051	961	1002	utr3
NM_001002051	1100	1141	utr3
NM_001002051	1680	1721	utr3
NM_001002051	1755	1796	utr3
NM_001002053	714	822	utr3
NM_001002053	946	987	utr3
NM_001002056	787	828	cds
NM_001002058	149	190	utr5
NM_001002058	1313	1387	utr3
NM_001002058	1404	1445	utr3
NM_001002063	1939	1980	cds
NM_001002063	2019	2060	cds
NM_001002064	223	264	cds
NM_001002064	1533	1574	utr3
NM_001002065	1488	1529	utr3
NM_001002067	476	546	cds
NM_001002067	722	763	utr3
NM_001002068	318	359	cds
NM_001002069	113	154	cds
NM_001002069	266	307	cds
NM_001002071	743	784	cds
NM_001002072	504	545	utr3
NM_001002072	558	599	utr3
NM_001002072	697	738	utr3
NM_001002072	849	890	utr3
NM_001002072	920	961	utr3
NM_001002072	1087	1128	utr3
NM_001002073	563	604	utr3
NM_001002073	621	662	utr3
NM_001002073	712	753	utr3
NM_001002073	789	830	utr3
NM_001002073	853	894	utr3
NM_001002073	1032	1073	utr3
NM_001002075	1180	1221	cds
NM_001002075	1724	1765	utr3
NM_001002075	1923	1964	utr3
NM_001002075	1972	2013	utr3
NM_001002077	360	401	utr3
NM_001002078	321	362	utr3
NM_001002079	458	499	utr3
NM_001002081	65	106	cds
NM_001002081	525	566	utr3
NM_001002082	661	702	utr3
NM_001002082	713	791	utr3
NM_001002082	837	878	utr3
NM_001002082	897	938	utr3
NM_001002087	1423	1464	cds
NM_001002089	1834	1875	utr3
NM_001002090	695	736	cds
NM_001002092	1502	1543	cds
NM_001002097	290	331	utr3
NM_001002097	660	701	utr3
NM_001002102	1008	1049	utr3
NM_001002102	1084	1125	utr3
NM_001002102	1372	1413	utr3
NM_001002102	1487	1528	utr3
NM_001002102	1719	1760	utr3
NM_001002104	1531	1572	utr3
NM_001002106	95	136	cds
NM_001002106	922	963	cds
NM_001002106	995	1036	utr3
NM_001002108	220	261	cds
NM_001002111	1105	1146	utr3
NM_001002113	951	992	cds
NM_001002115	1286	1327	utr3
NM_001002116	1098	1139	cds
NM_001002116	1187	1228	utr3
NM_001002116	1252	1325	utr3
NM_001002116	1402	1443	utr3
NM_001002116	1473	1514	utr3
NM_001002116	1549	1590	utr3
NM_001002116	1690	1731	utr3
NM_001002121	1154	1195	cds
NM_001002121	1750	1791	utr3
NM_001002121	1804	1845	utr3
NM_001002121	1850	1932	utr3
NM_001002121	1957	2025	utr3
NM_001002122	1563	1604	utr3
NM_001002122	1655	1696	utr3
NM_001002123	187	228	cds
NM_001002123	585	626	cds
NM_001002123	662	703	cds
NM_001002126	13	54	utr5
NM_001002126	276	317	cds
NM_001002126	699	740	utr3
NM_001002126	881	922	utr3
NM_001002126	1018	1059	utr3
NM_001002126	1108	1149	utr3
NM_001002126	2231	2272	utr3
NM_001002126	2373	2414	utr3
NM_001002126	2438	2479	utr3
NM_001002137	575	616	utr3
NM_001002137	804	845	utr3
NM_001002137	876	917	utr3
NM_001002137	943	984	utr3
NM_001002139	528	599	utr3
NM_001002145	5	46	utr5
NM_001002145	1407	1448	utr3
NM_001002145	1717	1758	utr3
NM_001002151	1335	1376	utr3
NM_001002151	1868	1909	utr3
NM_001002151	1993	2034	utr3
NM_001002152	439	480	cds
NM_001002152	584	625	cds
NM_001002152	760	801	utr3
NM_001002152	1183	1224	utr3
NM_001002152	1291	1332	utr3
NM_001002152	1362	1403	utr3
NM_001002152	1433	1474	utr3
NM_001002152	1514	1555	utr3
NM_001002152	1693	1734	utr3
NM_001002155	333	374	cds
NM_001002155	515	556	utr3
NM_001002159	1505	1546	utr3
NM_001002160	1268	1309	utr3
NM_001002161	1642	1717	cds
NM_001002161	1871	1912	utr3
NM_001002162	1031	1072	utr3
NM_001002162	1348	1389	utr3
NM_001002162	1906	1947	utr3
NM_001002163	224	265	cds
NM_001002163	468	509	utr3
NM_001002163	558	599	utr3
NM_001002164	1371	1412	utr3
NM_001002164	1470	1511	utr3
NM_001002164	1551	1592	utr3
NM_001002166	433	474	cds
NM_001002166	4701	4742	utr3
NM_001002166	4975	5016	utr3
NM_001002166	5117	5158	utr3
NM_001002170	1866	1907	utr3
NM_001002170	2330	2371	utr3
NM_001002172	1624	1665	utr3
NM_001002172	1686	1727	utr3
NM_001002179	1098	1139	cds
NM_001002179	1318	1359	utr3
NM_001002179	1609	1650	utr3
NM_001002179	2264	2305	utr3
NM_001002180	2149	2190	utr3
NM_001002180	2413	2454	utr3
NM_001002180	2554	2595	utr3
NM_001002181	2059	2100	utr3
NM_001002186	1005	1046	utr3
NM_001002186	1079	1120	utr3
NM_001002186	1466	1507	utr3
NM_001002190	643	684	utr3
NM_001002199	622	663	utr3
NM_001002203	13	54	cds
NM_001002203	84	125	cds
NM_001002203	147	188	cds
NM_001002203	455	496	utr3
NM_001002203	569	610	utr3
NM_001002203	709	750	utr3
NM_001002204	1242	1283	utr3
NM_001002222	2155	2196	utr3
NM_001002222	2235	2276	utr3
NM_001002222	2678	2719	utr3
NM_001002222	2724	2765	utr3
NM_001002222	2798	2839	utr3
NM_001002222	2871	2912	utr3
NM_001002222	3285	3326	utr3
NM_001002222	3457	3498	utr3
NM_001002222	3967	4008	utr3
NM_001002222	4097	4138	utr3
NM_001002222	4142	4183	utr3
NM_001002222	4192	4267	utr3
NM_001002222	4349	4390	utr3
NM_001002222	4983	5024	utr3
NM_001002222	5394	5435	utr3
NM_001002222	5643	5684	utr3
NM_001002222	5701	5742	utr3
NM_001002222	5775	5816	utr3
NM_001002297	1458	1499	cds
NM_001002297	1788	1829	utr3
NM_001002298	1107	1148	cds
NM_001002298	2546	2587	utr3
NM_001002298	3062	3103	utr3
NM_001002300	1395	1436	cds
NM_001002300	2156	2197	utr3
NM_001002300	2270	2311	utr3
NM_001002300	2654	2695	utr3
NM_001002304	1576	1617	utr3
NM_001002304	2039	2080	utr3
NM_001002304	2444	2485	utr3
NM_001002316	89	130	utr5
NM_001002316	1839	1880	utr3
NM_001002316	2032	2073	utr3
NM_001002319	1216	1257	utr3
NM_001002319	1857	1898	utr3
NM_001002319	2091	2132	utr3
NM_001002320	869	910	utr3
NM_001002320	1114	1155	utr3
NM_001002320	1167	1208	utr3
NM_001002320	1351	1392	utr3
NM_001002320	1467	1508	utr3
NM_001002320	2054	2095	utr3
NM_001002320	2358	2399	utr3
NM_001002321	1189	1230	utr3
NM_001002321	1272	1313	utr3
NM_001002322	728	769	cds
NM_001002323	829	870	utr3
NM_001002324	1340	1381	utr3
NM_001002324	1572	1613	utr3
NM_001002330	1823	1864	utr3
NM_001002335	1728	1769	utr3
NM_001002353	1111	1152	utr3
NM_001002353	1245	1286	utr3
NM_001002355	2229	2270	utr3
NM_001002356	1161	1202	utr3
NM_001002364	757	798	cds
NM_001002364	812	853	utr3
NM_001002364	980	1133	utr3
NM_001002374	2067	2108	utr3
NM_001002375	79	120	cds
NM_001002375	491	532	cds
NM_001002375	1222	1263	utr3
NM_001002376	991	1032	cds
NM_001002376	1475	1516	utr3
NM_001002376	1581	1622	utr3
NM_001002378	48	89	utr5
NM_001002378	813	854	utr3
NM_001002383	1407	1448	utr3
NM_001002384	2428	2469	cds
NM_001002384	2480	2521	utr3
NM_001002384	2591	2667	utr3
NM_001002386	2284	2325	utr3
NM_001002387	1110	1151	utr3
NM_001002387	1298	1339	utr3
NM_001002387	1367	1443	utr3
NM_001002387	1468	1509	utr3
NM_001002398	737	778	utr3
NM_001002411	1122	1163	utr3
NM_001002415	1381	1422	utr3
NM_001002416	1174	1215	utr3
NM_001002417	624	665	utr3
NM_001002417	815	856	utr3
NM_001002419	2411	2452	utr3
NM_001002420	1510	1551	cds
NM_001002422	948	989	utr3
NM_001002427	506	547	utr3
NM_001002431	1206	1247	utr3
NM_001002435	797	838	cds
NM_001002435	1002	1043	utr3
NM_001002438	473	514	utr3
NM_001002440	438	479	utr3
NM_001002440	535	576	utr3
NM_001002440	586	627	utr3
NM_001002440	813	854	utr3
NM_001002445	798	839	utr3
NM_001002448	1300	1341	utr3
NM_001002448	1382	1423	utr3
NM_001002448	1463	1504	utr3
NM_001002449	1140	1181	utr3
NM_001002453	907	948	cds
NM_001002456	1769	1810	utr3
NM_001002464	949	990	utr3
NM_001002465	640	712	utr3
NM_001002465	1110	1192	utr3
NM_001002470	1033	1074	utr3
NM_001002473	761	802	utr3
NM_001002473	871	912	utr3
NM_001002473	1009	1050	utr3
NM_001002477	690	731	utr3
NM_001002478	489	530	utr3
NM_001002478	588	629	utr3
NM_001002484	688	729	cds
NM_001002486	259	300	utr3
NM_001002488	627	668	utr3
NM_001002488	700	741	utr3
NM_001002488	763	804	utr3
NM_001002488	1492	1533	utr3
NM_001002499	215	256	cds
NM_001002499	311	352	cds
NM_001002499	471	512	utr3
NM_001002500	1125	1166	utr3
NM_001002503	1224	1265	utr3
NM_001002503	1302	1343	utr3
NM_001002503	2255	2296	utr3
NM_001002503	2410	2451	utr3
NM_001002503	2556	2597	utr3
NM_001002503	2691	2732	utr3
NM_001002503	3034	3075	utr3
NM_001002503	3379	3420	utr3
NM_001002503	3470	3511	utr3
NM_001002504	1562	1603	cds
NM_001002504	5097	5138	cds
NM_001002504	8148	8189	utr3
NM_001002504	8256	8297	utr3
NM_001002504	8302	8343	utr3
NM_001002504	8458	8499	utr3
NM_001002504	8532	8573	utr3
NM_001002505	509	550	utr3
NM_001002505	636	677	utr3
NM_001002509	239	280	cds
NM_001002509	312	353	utr3
NM_001002509	422	463	utr3
NM_001002511	901	942	utr3
NM_001002521	502	543	cds
NM_001002521	916	957	utr3
NM_001002525	847	888	cds
NM_001002525	1337	1419	utr3
NM_001002527	278	319	utr5
NM_001002527	815	856	utr3
NM_001002527	858	899	utr3
NM_001002527	912	953	utr3
NM_001002534	73	114	cds
NM_001002534	756	797	utr3
NM_001002535	420	461	cds
NM_001002540	945	986	utr3
NM_001002540	1027	1068	utr3
NM_001002540	1110	1151	utr3
NM_001002540	1264	1305	utr3
NM_001002544	290	331	cds
NM_001002544	653	694	utr3
NM_001002544	738	779	utr3
NM_001002551	1349	1390	utr3
NM_001002557	717	758	utr3
NM_001002557	889	930	utr3
NM_001002559	1121	1162	cds
NM_001002559	1186	1227	cds
NM_001002559	1441	1482	utr3
NM_001002566	139	180	utr5
NM_001002566	1063	1104	utr3
NM_001002566	1176	1217	utr3
NM_001002566	1254	1295	utr3
NM_001002567	1126	1167	utr3
NM_001002567	1175	1216	utr3
NM_001002572	1055	1096	utr3
NM_001002573	927	968	utr3
NM_001002575	815	856	utr3
NM_001002575	939	980	utr3
NM_001002575	1000	1041	utr3
NM_001002575	1067	1108	utr3
NM_001002578	1210	1251	utr3
NM_001002578	1486	1527	utr3
NM_001002588	2608	2649	utr3
NM_001002596	1397	1438	utr3
NM_001002600	1101	1142	utr3
NM_001002604	1164	1205	utr3
NM_001002604	1216	1257	utr3
NM_001002604	1436	1477	utr3
NM_001002606	957	998	utr3
NM_001002606	1294	1335	utr3
NM_001002606	1345	1386	utr3
NM_001002609	199	240	cds
NM_001002610	724	765	cds
NM_001002610	772	813	cds
NM_001002610	911	952	utr3
NM_001002610	1097	1138	utr3
NM_001002610	1622	1663	utr3
NM_001002610	1712	1828	utr3
NM_001002610	2284	2325	utr3
NM_001002610	2360	2401	utr3
NM_001002616	2046	2087	utr3
NM_001002616	2384	2425	utr3
NM_001002625	1165	1206	cds
NM_001002631	1020	1061	cds
NM_001002632	1301	1342	utr3
NM_001002635	1790	1831	utr3
NM_001002635	1852	1893	utr3
NM_001002639	957	998	cds
NM_001002639	1569	1610	utr3
NM_001002639	1707	1748	utr3
NM_001002648	2645	2686	utr3
NM_001002649	3546	3587	utr3
NM_001002651	2063	2104	cds
NM_001002651	2479	2520	utr3
NM_001002651	2662	2703	utr3
NM_001002651	3488	3529	utr3
NM_001002656	2168	2209	utr3
NM_001002656	2388	2429	utr3
NM_001002656	2488	2529	utr3
NM_001002656	2592	2633	utr3
NM_001002656	2954	2995	utr3
NM_001002656	3075	3116	utr3
NM_001002656	3179	3220	utr3
NM_001002656	3229	3270	utr3
NM_001002656	3384	3465	utr3
NM_001002656	3479	3520	utr3
NM_001002656	3667	3708	utr3
NM_001002656	3801	3842	utr3
NM_001002656	3844	3925	utr3
NM_001002656	3966	4007	utr3
NM_001002656	4071	4112	utr3
NM_001002656	4219	4260	utr3
NM_001002656	4388	4429	utr3
NM_001002656	4695	4736	utr3
NM_001002656	5125	5166	utr3
NM_001002656	5333	5374	utr3
NM_001002656	5721	5762	utr3
NM_001002656	5795	5836	utr3
NM_001002656	5965	6006	utr3
NM_001002658	1336	1377	cds
NM_001002658	2058	2099	utr3
NM_001002658	2188	2317	utr3
NM_001002658	2332	2373	utr3
NM_001002659	1259	1300	utr3
NM_001002660	2571	2612	utr3
NM_001002660	2986	3027	utr3
NM_001002660	3048	3089	utr3
NM_001002665	2177	2218	utr3
NM_001002667	1549	1590	utr3
NM_001002667	1631	1672	utr3
NM_001002667	1673	1714	utr3
NM_001002667	2191	2232	utr3
NM_001002667	2837	2878	utr3
NM_001002667	3427	3468	utr3
NM_001002667	3558	3599	utr3
NM_001002667	3705	3746	utr3
NM_001002667	4613	4654	utr3
NM_001002669	1211	1252	utr3
NM_001002669	1449	1490	utr3
NM_001002673	238	313	cds
NM_001002673	2624	2665	utr3
NM_001002673	2694	2735	utr3
NM_001002676	1782	1884	utr3
NM_001002676	2748	2789	utr3
NM_001002676	3302	3343	utr3
NM_001002676	3394	3435	utr3
NM_001002677	121	162	utr5
NM_001002677	196	237	cds
NM_001002677	345	386	cds
NM_001002677	471	512	utr3
NM_001002677	600	641	utr3
NM_001002677	910	951	utr3
NM_001002677	1241	1282	utr3
NM_001002678	779	820	utr3
NM_001002679	1181	1222	utr3
NM_001002680	2382	2423	utr3
NM_001002684	560	601	cds
NM_001002686	862	903	utr3
NM_001002686	1001	1042	utr3
NM_001002686	1098	1139	utr3
NM_001002687	3586	3627	utr3
NM_001002687	3642	3683	utr3
NM_001002687	4232	4273	utr3
NM_001002687	4567	4608	utr3
NM_001002688	106	147	utr5
NM_001002688	895	936	cds
NM_001002688	1425	1466	utr3
NM_001002688	1704	1745	utr3
NM_001002688	1853	1894	utr3
NM_001002688	1901	1942	utr3
NM_001002688	1972	2013	utr3
NM_001002688	2173	2214	utr3
NM_001002688	2381	2422	utr3
NM_001002691	354	395	utr5
NM_001002691	418	459	cds
NM_001002691	500	575	cds
NM_001002691	599	640	cds
NM_001002691	1847	1888	utr3
NM_001002692	575	616	cds
NM_001002692	848	889	cds
NM_001002692	1059	1100	utr3
NM_001002692	1398	1439	utr3
NM_001002692	1460	1501	utr3
NM_001002692	2064	2105	utr3
NM_001002692	2137	2178	utr3
NM_001002692	2187	2228	utr3
NM_001002692	2485	2526	utr3
NM_001002697	778	819	utr3
NM_001002699	3218	3259	utr3
NM_001002703	295	336	cds
NM_001002703	655	696	utr3
NM_001002703	705	746	utr3
NM_001002703	767	808	utr3
NM_001002704	489	530	cds
NM_001002704	746	816	utr3
NM_001002707	518	559	utr3
NM_001002707	719	760	utr3
NM_001002711	871	912	utr3
NM_001002713	1925	1966	utr3
NM_001002719	89	130	cds
NM_001002719	1043	1084	utr3
NM_001002720	2022	2063	utr3
NM_001002720	2207	2248	utr3
NM_001002720	2341	2382	utr3
NM_001002725	1384	1425	utr3
NM_001002725	1652	1693	utr3
NM_001002725	1790	1831	utr3
NM_001002726	2489	2530	cds
NM_001002728	2254	2295	utr3
NM_001002741	1903	1944	cds
NM_001002752	1005	1046	utr3
NM_001002864	914	955	cds
NM_001002864	1308	1349	cds
NM_001002864	1554	1595	cds
NM_001002864	1624	1665	utr3
NM_001002865	748	829	cds
NM_001002865	903	944	utr3
NM_001002866	259	300	cds
NM_001002866	427	468	utr3
NM_001002867	2327	2368	cds
NM_001002867	3041	3082	cds
NM_001002867	6450	6491	cds
NM_001002867	6562	6603	cds
NM_001002867	7023	7064	cds
NM_001002867	7514	7555	cds
NM_001002867	7613	7654	cds
NM_001002867	8335	8376	cds
NM_001002867	8441	8482	cds
NM_001002869	1965	2006	cds
NM_001002869	2057	2098	cds
NM_001002869	2551	2592	utr3
NM_001002870	915	956	cds
NM_001002870	3942	3983	utr3
NM_001002871	3817	3858	utr3
NM_001002872	1345	1386	utr3
NM_001002872	1654	1695	utr3
NM_001002873	1355	1396	cds
NM_001002874	849	890	utr3
NM_001003411	58	99	cds
NM_001003411	158	235	cds
NM_001003411	324	394	cds
NM_001003411	2117	2158	utr3
NM_001003412	2319	2360	utr3
NM_001003413	570	611	utr3
NM_001003418	416	457	cds
NM_001003418	681	722	utr3
NM_001003419	2303	2344	utr3
NM_001003422	285	326	cds
NM_001003422	521	562	utr3
NM_001003422	568	609	utr3
NM_001003422	741	782	utr3
NM_001003422	870	911	utr3
NM_001003427	923	964	utr3
NM_001003429	312	353	cds
NM_001003429	391	432	cds
NM_001003429	535	576	cds
NM_001003429	710	751	utr3
NM_001003432	589	630	utr3
NM_001003434	306	347	utr3
NM_001003437	197	238	cds
NM_001003437	394	435	cds
NM_001003437	717	758	utr3
NM_001003437	899	940	utr3
NM_001003439	757	836	utr3
NM_001003439	869	910	utr3
NM_001003439	924	965	utr3
NM_001003439	1050	1091	utr3
NM_001003447	127	168	cds
NM_001003447	631	672	utr3
NM_001003461	1108	1149	utr3
NM_001003463	1162	1203	utr3
NM_001003463	1411	1452	utr3
NM_001003466	732	773	cds
NM_001003466	1120	1161	cds
NM_001003466	1495	1536	utr3
NM_001003470	1455	1496	cds
NM_001003471	1373	1414	utr3
NM_001003479	2026	2067	utr3
NM_001003483	1028	1069	utr3
NM_001003483	1126	1167	utr3
NM_001003483	1192	1233	utr3
NM_001003483	1247	1288	utr3
NM_001003484	2424	2465	utr3
NM_001003484	2469	2510	utr3
NM_001003484	2518	2559	utr3
NM_001003484	2567	2608	utr3
NM_001003484	2632	2673	utr3
NM_001003493	1054	1095	utr3
NM_001003493	1147	1188	utr3
NM_001003493	1220	1261	utr3
NM_001003493	1489	1530	utr3
NM_001003494	1210	1251	utr3
NM_001003501	69	110	cds
NM_001003501	2148	2189	utr3
NM_001003501	2454	2495	utr3
NM_001003501	2553	2594	utr3
NM_001003504	1629	1670	utr3
NM_001003504	1880	1921	utr3
NM_001003504	1999	2040	utr3
NM_001003504	2056	2097	utr3
NM_001003509	341	382	cds
NM_001003521	8	49	utr5
NM_001003521	943	984	utr3
NM_001003521	1180	1221	utr3
NM_001003521	1348	1389	utr3
NM_001003521	1415	1456	utr3
NM_001003521	1730	1771	utr3
NM_001003521	2040	2081	utr3
NM_001003521	2089	2130	utr3
NM_001003526	2503	2544	utr3
NM_001003528	1120	1161	utr3
NM_001003528	1162	1203	utr3
NM_001003528	1277	1318	utr3
NM_001003528	1334	1407	utr3
NM_001003528	1413	1482	utr3
NM_001003528	1528	1569	utr3
NM_001003528	1766	1807	utr3
NM_001003528	1992	2033	utr3
NM_001003528	2148	2189	utr3
NM_001003528	2475	2516	utr3
NM_001003528	2614	2655	utr3
NM_001003528	2787	2828	utr3
NM_001003528	2848	2889	utr3
NM_001003528	3106	3147	utr3
NM_001003528	3414	3455	utr3
NM_001003528	3799	3840	utr3
NM_001003528	4133	4174	utr3
NM_001003528	4346	4387	utr3
NM_001003529	1452	1493	cds
NM_001003532	309	350	utr5
NM_001003532	1292	1333	utr3
NM_001003535	559	600	cds
NM_001003535	2289	2330	cds
NM_001003535	3200	3241	cds
NM_001003535	5301	5342	utr3
NM_001003535	5360	5401	utr3
NM_001003537	1707	1748	utr3
NM_001003538	939	980	utr3
NM_001003539	560	601	cds
NM_001003547	2175	2216	cds
NM_001003547	5606	5647	utr3
NM_001003547	5987	6028	utr3
NM_001003547	6223	6264	utr3
NM_001003547	6366	6407	utr3
NM_001003548	787	855	utr3
NM_001003549	596	637	utr3
NM_001003549	728	769	utr3
NM_001003551	469	510	cds
NM_001003553	999	1040	utr3
NM_001003556	1499	1540	utr3
NM_001003562	2283	2324	utr3
NM_001003564	750	791	utr3
NM_001003566	680	721	utr3
NM_001003570	2540	2581	utr3
NM_001003570	3224	3265	utr3
NM_001003571	1361	1402	utr3
NM_001003571	1495	1536	utr3
NM_001003584	623	664	cds
NM_001003589	577	618	utr3
NM_001003589	681	722	utr3
NM_001003591	787	828	utr3
NM_001003593	550	591	utr3
NM_001003593	722	763	utr3
NM_001003595	1410	1451	utr3
NM_001003595	1656	1697	utr3
NM_001003595	1718	1759	utr3
NM_001003597	1080	1121	utr3
NM_001003597	1383	1424	utr3
NM_001003609	3128	3169	utr3
NM_001003612	2485	2526	utr3
NM_001003614	1740	1781	cds
NM_001003616	118	159	utr5
NM_001003618	349	390	cds
NM_001003618	701	742	utr3
NM_001003623	763	804	utr3
NM_001003623	960	1001	utr3
NM_001003623	1367	1408	utr3
NM_001003623	1421	1462	utr3
NM_001003623	1570	1611	utr3
NM_001003623	1885	1926	utr3
NM_001003623	1929	1970	utr3
NM_001003623	2052	2093	utr3
NM_001003623	2100	2167	utr3
NM_001003623	2194	2235	utr3
NM_001003626	485	526	cds
NM_001003626	1455	1496	utr3
NM_001003626	1501	1542	utr3
NM_001003626	1587	1628	utr3
NM_001003626	1908	1949	utr3
NM_001003626	2156	2197	utr3
NM_001003626	2436	2477	utr3
NM_001003626	2661	2702	utr3
NM_001003628	974	1015	cds
NM_001003628	1249	1290	utr3
NM_001003628	1422	1463	utr3
NM_001003629	3	44	utr5
NM_001003631	885	926	utr3
NM_001003631	1024	1065	utr3
NM_001003632	832	873	utr3
NM_001003634	1688	1729	cds
NM_001003640	2	43	utr5
NM_001003640	1683	1724	utr3
NM_001003644	1275	1316	cds
NM_001003645	1803	1844	utr3
NM_001003647	2059	2100	utr3
NM_001003647	2903	2944	utr3
NM_001003648	1459	1500	utr3
NM_001003648	1731	1772	utr3
NM_001003648	1774	1815	utr3
NM_001003648	2517	2558	utr3
NM_001003649	713	754	cds
NM_001003728	760	801	utr3
NM_001003730	768	809	utr3
NM_001003730	1241	1282	utr3
NM_001003730	1389	1430	utr3
NM_001003731	369	410	utr3
NM_001003731	430	471	utr3
NM_001003731	499	540	utr3
NM_001003731	864	905	utr3
NM_001003739	105	146	utr5
NM_001003739	1231	1272	cds
NM_001003739	1344	1385	utr3
NM_001003739	1455	1496	utr3
NM_001003740	1241	1312	utr3
NM_001003741	330	371	cds
NM_001003741	3352	3393	utr3
NM_001003744	5568	5609	utr3
NM_001003756	858	899	utr3
NM_001003758	1066	1146	utr3
NM_001003758	1196	1237	utr3
NM_001003758	1372	1413	utr3
NM_001003758	1414	1455	utr3
NM_001003761	1583	1624	utr3
NM_001003762	582	623	utr3
NM_001003762	903	944	utr3
NM_001003762	948	989	utr3
NM_001003766	842	883	cds
NM_001003766	1342	1383	utr3
NM_001003769	1542	1583	cds
NM_001003769	1671	1712	utr3
NM_001003774	635	676	cds
NM_001003774	799	840	cds
NM_001003780	102	143	utr5
NM_001003780	1122	1163	utr3
NM_001003781	1414	1455	utr3
NM_001003822	1145	1186	cds
NM_001003822	2549	2590	utr3
NM_001003822	2603	2644	utr3
NM_001003822	2805	2846	utr3
NM_001003822	3149	3190	utr3
NM_001003831	1905	1946	cds
NM_001003832	1279	1320	utr3
NM_001003835	3555	3596	cds
NM_001003835	3650	3691	cds
NM_001003835	4078	4119	utr3
NM_001003835	4218	4259	utr3
NM_001003835	4330	4371	utr3
NM_001003836	2222	2263	utr3
NM_001003836	2351	2392	utr3
NM_001003837	2627	2668	utr3
NM_001003838	525	566	cds
NM_001003840	707	748	cds
NM_001003840	775	816	cds
NM_001003840	857	898	cds
NM_001003840	997	1038	utr3
NM_001003842	1026	1101	utr3
NM_001003842	1503	1579	utr3
NM_001003842	1668	1709	utr3
NM_001003842	1710	1751	utr3
NM_001003844	682	723	cds
NM_001003844	842	913	cds
NM_001003846	613	654	cds
NM_001003846	3991	4032	utr3
NM_001003850	1427	1468	utr3
NM_001003850	1476	1517	utr3
NM_001003856	569	610	cds
NM_001003856	2780	2821	utr3
NM_001003860	520	596	utr3
NM_001003860	618	659	utr3
NM_001003862	1050	1091	utr3
NM_001003866	1253	1294	utr3
NM_001003867	2595	2636	utr3
NM_001003868	258	299	cds
NM_001003868	354	395	utr3
NM_001003868	532	573	utr3
NM_001003869	852	893	cds
NM_001003869	1226	1267	cds
NM_001003869	1319	1360	cds
NM_001003869	1482	1523	utr3
NM_001003870	2335	2376	cds
NM_001003870	3461	3502	utr3
NM_001003870	3542	3583	utr3
NM_001003870	3591	3632	utr3
NM_001003870	3796	3864	utr3
NM_001003870	3892	3933	utr3
NM_001003870	4069	4110	utr3
NM_001003870	4238	4279	utr3
NM_001003870	4407	4448	utr3
NM_001003870	4553	4594	utr3
NM_001003870	4636	4677	utr3
NM_001003871	1071	1112	cds
NM_001003873	89	130	utr5
NM_001003873	136	207	utr5
NM_001003873	609	650	utr5
NM_001003874	76	117	utr5
NM_001003875	315	356	cds
NM_001003875	980	1021	cds
NM_001003875	1081	1122	cds
NM_001003875	1235	1276	cds
NM_001003875	1285	1326	cds
NM_001003875	1388	1429	cds
NM_001003875	1963	2065	utr3
NM_001003875	2155	2196	utr3
NM_001003875	2315	2356	utr3
NM_001003875	2370	2438	utr3
NM_001003876	921	962	cds
NM_001003876	976	1017	cds
NM_001003878	176	217	cds
NM_001003878	961	1002	cds
NM_001003878	1168	1209	utr3
NM_001003878	1286	1327	utr3
NM_001003878	1433	1474	utr3
NM_001003878	1535	1576	utr3
NM_001003878	1681	1722	utr3
NM_001003878	1788	1829	utr3
NM_001003879	1390	1431	utr3
NM_001003881	564	605	utr3
NM_001003882	1477	1518	cds
NM_001003887	5799	5840	cds
NM_001003888	503	544	utr3
NM_001003889	761	802	utr3
NM_001003889	823	864	utr3
NM_001003890	96	137	utr5
NM_001003890	459	500	cds
NM_001003890	1292	1333	cds
NM_001003890	1600	1641	cds
NM_001003984	2800	2841	utr3
NM_001003988	2398	2439	utr3
NM_001003988	2796	2837	utr3
NM_001003991	1803	1844	utr3
NM_001003994	208	249	utr5
NM_001003994	2230	2271	cds
NM_001003994	2417	2458	cds
NM_001003994	3175	3216	cds
NM_001003994	3381	3422	utr3
NM_001003994	3505	3546	utr3
NM_001003994	3565	3606	utr3
NM_001003994	3660	3701	utr3
NM_001003994	3744	3785	utr3
NM_001003994	3868	3909	utr3
NM_001003994	3956	3997	utr3
NM_001003994	4003	4044	utr3
NM_001004000	2289	2330	utr3
NM_001004000	2795	2836	utr3
NM_001004001	702	743	cds
NM_001004001	991	1032	utr3
NM_001004001	1133	1211	utr3
NM_001004001	1747	1788	utr3
NM_001004002	1367	1408	utr3
NM_001004002	1709	1750	utr3
NM_001004002	1842	1883	utr3
NM_001004002	2041	2082	utr3
NM_001004003	1075	1116	cds
NM_001004003	2296	2337	cds
NM_001004003	2924	2998	utr3
NM_001004003	3069	3110	utr3
NM_001004003	3147	3188	utr3
NM_001004006	1479	1520	utr3
NM_001004108	1875	1916	utr3
NM_001004111	3991	4032	utr3
NM_001004111	4657	4698	utr3
NM_001004114	4210	4251	utr3
NM_001004115	1570	1611	utr3
NM_001004287	2091	2132	utr3
NM_001004287	2563	2604	utr3
NM_001004288	4	45	utr5
NM_001004288	3643	3684	utr3
NM_001004288	3754	3795	utr3
NM_001004288	3838	3879	utr3
NM_001004288	4741	4782	utr3
NM_001004288	4794	4835	utr3
NM_001004288	5063	5104	utr3
NM_001004288	5137	5178	utr3
NM_001004288	5182	5223	utr3
NM_001004288	5336	5377	utr3
NM_001004289	169	210	cds
NM_001004289	1189	1230	cds
NM_001004289	1611	1652	cds
NM_001004289	1679	1720	utr3
NM_001004289	1765	1806	utr3
NM_001004295	34	75	utr5
NM_001004295	1567	1608	utr3
NM_001004295	1635	1676	utr3
NM_001004295	1680	1721	utr3
NM_001004295	1782	1823	utr3
NM_001004295	1931	1972	utr3
NM_001004295	2062	2103	utr3
NM_001004295	2350	2391	utr3
NM_001004295	2790	2858	utr3
NM_001004295	3032	3073	utr3
NM_001004295	3378	3419	utr3
NM_001004296	78	119	utr5
NM_001004296	1038	1079	cds
NM_001004296	1126	1167	cds
NM_001004296	1938	1979	utr3
NM_001004296	2225	2266	utr3
NM_001004296	2335	2376	utr3
NM_001004296	2452	2493	utr3
NM_001004296	2968	3009	utr3
NM_001004296	3262	3303	utr3
NM_001004494	1384	1425	cds
NM_001004494	1989	2030	utr3
NM_001004494	2150	2191	utr3
NM_001004494	2214	2255	utr3
NM_001004499	490	531	cds
NM_001004499	2651	2692	utr3
NM_001004517	2533	2574	utr3
NM_001004520	982	1023	cds
NM_001004520	1551	1592	cds
NM_001004520	2518	2559	utr3
NM_001004527	1137	1178	utr3
NM_001004527	1393	1434	utr3
NM_001004527	1473	1514	utr3
NM_001004527	1555	1596	utr3
NM_001004527	2044	2085	utr3
NM_001004527	2171	2212	utr3
NM_001004536	958	999	utr3
NM_001004551	2096	2137	utr3
NM_001004552	2560	2601	utr3
NM_001004552	2762	2803	utr3
NM_001004552	2846	2887	utr3
NM_001004552	3293	3334	utr3
NM_001004552	3489	3556	utr3
NM_001004552	3596	3637	utr3
NM_001004553	692	733	utr3
NM_001004553	749	790	utr3
NM_001004553	1878	1919	utr3
NM_001004553	2099	2140	utr3
NM_001004553	2165	2206	utr3
NM_001004553	2343	2384	utr3
NM_001004553	2496	2537	utr3
NM_001004554	41	82	utr5
NM_001004554	1639	1680	utr3
NM_001004554	1735	1776	utr3
NM_001004554	2594	2635	utr3
NM_001004554	2788	2829	utr3
NM_001004554	3361	3402	utr3
NM_001004554	3506	3547	utr3
NM_001004554	4065	4106	utr3
NM_001004554	4168	4209	utr3
NM_001004555	764	805	utr3
NM_001004555	847	888	utr3
NM_001004555	987	1028	utr3
NM_001004555	1056	1097	utr3
NM_001004555	1149	1190	utr3
NM_001004555	1449	1522	utr3
NM_001004555	1639	1680	utr3
NM_001004557	2757	2798	utr3
NM_001004560	1819	1860	utr3
NM_001004560	1866	1907	utr3
NM_001004560	1992	2033	utr3
NM_001004561	1418	1459	utr3
NM_001004561	1890	1931	utr3
NM_001004577	1938	1979	utr3
NM_001004577	2087	2128	utr3
NM_001004577	2285	2326	utr3
NM_001004578	2541	2582	utr3
NM_001004581	1422	1463	cds
NM_001004581	2494	2535	cds
NM_001004584	3336	3377	utr3
NM_001004588	1862	1903	utr3
NM_001004589	818	859	utr3
NM_001004589	1326	1367	utr3
NM_001004589	1779	1820	utr3
NM_001004589	2100	2179	utr3
NM_001004589	2701	2742	utr3
NM_001004589	2749	2790	utr3
NM_001004591	542	583	cds
NM_001004591	819	860	cds
NM_001004591	1460	1501	utr3
NM_001004592	166	207	cds
NM_001004592	385	426	cds
NM_001004592	2380	2421	cds
NM_001004592	2796	2837	cds
NM_001004592	3037	3078	utr3
NM_001004593	1037	1078	utr3
NM_001004593	1149	1190	utr3
NM_001004595	579	620	cds
NM_001004597	2621	2662	utr3
NM_001004598	2346	2387	utr3
NM_001004601	74	156	utr5
NM_001004601	161	202	utr5
NM_001004601	672	713	cds
NM_001004601	826	867	cds
NM_001004601	1005	1046	cds
NM_001004601	1265	1306	utr3
NM_001004601	1461	1502	utr3
NM_001004601	1560	1601	utr3
NM_001004601	1608	1649	utr3
NM_001004601	1762	1803	utr3
NM_001004601	1929	2002	utr3
NM_001004601	2006	2047	utr3
NM_001004601	2161	2202	utr3
NM_001004601	2267	2308	utr3
NM_001004601	2382	2423	utr3
NM_001004601	2424	2465	utr3
NM_001004601	2529	2570	utr3
NM_001004601	2727	2768	utr3
NM_001004601	2903	2944	utr3
NM_001004606	1822	1863	utr3
NM_001004608	357	398	cds
NM_001004633	1064	1105	utr3
NM_001004635	668	709	utr3
NM_001004635	946	987	utr3
NM_001004635	1031	1072	utr3
NM_001004639	567	608	cds
NM_001004639	611	652	cds
NM_001004639	698	766	cds
NM_001004639	770	811	utr3
NM_001004639	1364	1405	utr3
NM_001004640	1309	1350	utr3
NM_001004641	979	1020	utr3
NM_001004642	2349	2390	utr3
NM_001004648	1006	1047	utr3
NM_001004651	454	495	utr3
NM_001004652	137	178	cds
NM_001004659	749	790	cds
NM_001004659	873	914	utr3
NM_001004660	231	272	cds
NM_001004660	389	430	utr3
NM_001004660	541	582	utr3
NM_001004663	392	433	utr3
NM_001004664	588	629	cds
NM_001004664	2388	2500	utr3
NM_001004664	2631	2672	utr3
NM_001004664	2673	2714	utr3
NM_001004664	2924	2965	utr3
NM_001004664	3022	3089	utr3
NM_001004664	3491	3532	utr3
NM_001004665	457	498	utr3
NM_001004665	514	555	utr3
NM_001004667	589	630	cds
NM_001004667	875	916	utr3
NM_001004667	965	1006	utr3
NM_001004667	1070	1142	utr3
NM_001004667	1311	1352	utr3
NM_001004672	695	736	utr3
NM_001004672	1232	1273	utr3
NM_001004672	1667	1708	utr3
NM_001004672	1831	1872	utr3
NM_001004672	1922	1990	utr3
NM_001004673	657	698	utr3
NM_001004673	798	839	utr3
NM_001004674	257	298	cds
NM_001004674	730	771	utr3
NM_001004675	569	610	utr3
NM_001004677	806	847	utr3
NM_001005206	1545	1586	utr3
NM_001005306	1525	1566	utr3
NM_001005391	2904	2945	cds
NM_001005391	5368	5409	utr3
NM_001005391	5444	5485	utr3
NM_001005391	5510	5551	utr3
NM_001005391	5613	5654	utr3
NM_001005393	18	59	utr5
NM_001005393	3260	3301	cds
NM_001005395	545	586	cds
NM_001005395	1111	1152	cds
NM_001005395	1427	1468	cds
NM_001005395	2189	2230	cds
NM_001005395	2472	2513	utr3
NM_001005395	2786	2868	utr3
NM_001005395	3157	3198	utr3
NM_001005395	3209	3250	utr3
NM_001005395	3263	3304	utr3
NM_001005395	3333	3374	utr3
NM_001005395	3681	3722	utr3
NM_001005395	3753	3794	utr3
NM_001005395	3867	3908	utr3
NM_001005395	4039	4080	utr3
NM_001005395	4153	4194	utr3
NM_001005395	4199	4240	utr3
NM_001005395	4304	4345	utr3
NM_001005401	1623	1664	cds
NM_001005401	2049	2090	utr3
NM_001005401	2133	2174	utr3
NM_001005401	2399	2440	utr3
NM_001005401	2829	2870	utr3
NM_001005401	3142	3215	utr3
NM_001005401	3334	3375	utr3
NM_001005401	3547	3588	utr3
NM_001005401	3608	3649	utr3
NM_001005576	767	808	cds
NM_001005583	1344	1385	utr3
NM_001005583	1696	1737	utr3
NM_001005589	805	846	utr3
NM_001005590	1844	1885	utr3
NM_001005590	2441	2482	utr3
NM_001005590	2648	2689	utr3
NM_001005590	2727	2768	utr3
NM_001005591	796	837	cds
NM_001005591	1036	1077	utr3
NM_001005591	1539	1580	utr3
NM_001005604	363	404	cds
NM_001005769	1793	1834	utr3
NM_001005773	1646	1687	utr3
NM_001005778	1165	1206	cds
NM_001005778	1413	1454	cds
NM_001005778	1601	1642	cds
NM_001005927	2915	2991	utr3
NM_001005927	3344	3415	utr3
NM_001005929	3697	3738	utr3
NM_001005931	607	648	cds
NM_001005931	1073	1114	utr3
NM_001005931	1408	1449	utr3
NM_001005931	1534	1575	utr3
NM_001005931	1736	1777	utr3
NM_001005931	1786	1827	utr3
NM_001005931	2056	2097	utr3
NM_001005931	2140	2181	utr3
NM_001005931	2289	2330	utr3
NM_001005932	97	138	cds
NM_001005932	2239	2280	utr3
NM_001005934	1105	1146	cds
NM_001005934	1196	1237	utr3
NM_001005934	1277	1318	utr3
NM_001005934	1682	1723	utr3
NM_001005934	1745	1786	utr3
NM_001005936	1147	1188	cds
NM_001005936	1382	1423	cds
NM_001005937	81	122	cds
NM_001005937	439	480	cds
NM_001005937	1758	1799	cds
NM_001005937	2347	2388	cds
NM_001005937	2552	2634	cds
NM_001005937	2810	2851	cds
NM_001005941	674	715	utr3
NM_001005941	765	806	utr3
NM_001005941	978	1019	utr3
NM_001005941	1051	1092	utr3
NM_001005944	1991	2032	utr3
NM_001005944	2490	2531	utr3
NM_001005944	3126	3167	utr3
NM_001005944	4313	4354	utr3
NM_001005944	4397	4438	utr3
NM_001005948	1217	1258	utr3
NM_001005949	911	952	utr3
NM_001005950	1055	1096	utr3
NM_001005953	450	491	cds
NM_001005953	737	778	utr3
NM_001005954	760	801	utr3
NM_001005955	308	349	cds
NM_001005955	540	581	utr3
NM_001005955	593	634	utr3
NM_001005955	725	766	utr3
NM_001005955	843	884	utr3
NM_001005966	1120	1161	utr3
NM_001005966	3007	3048	utr3
NM_001005967	404	445	cds
NM_001005967	459	500	utr3
NM_001005967	505	546	utr3
NM_001005967	589	630	utr3
NM_001005967	674	791	utr3
NM_001005967	857	898	utr3
NM_001005985	600	641	cds
NM_001005986	975	1016	cds
NM_001005989	1491	1532	utr3
NM_001005989	1569	1610	utr3
NM_001005989	1663	1704	utr3
NM_001005993	1373	1414	utr3
NM_001005996	1437	1478	utr3
NM_001005999	108	149	utr5
NM_001005999	1059	1100	utr3
NM_001005999	1369	1410	utr3
NM_001006000	585	626	utr3
NM_001006000	935	976	utr3
NM_001006000	1006	1047	utr3
NM_001006000	1107	1148	utr3
NM_001006000	1452	1493	utr3
NM_001006000	1562	1603	utr3
NM_001006000	1705	1746	utr3
NM_001006004	663	704	utr3
NM_001006013	502	543	utr3
NM_001006013	635	676	utr3
NM_001006013	690	731	utr3
NM_001006016	1595	1636	cds
NM_001006018	1139	1180	utr3
NM_001006019	1400	1441	utr3
NM_001006022	201	242	cds
NM_001006022	1203	1244	utr3
NM_001006030	466	507	cds
NM_001006032	563	604	cds
NM_001006034	676	717	cds
NM_001006035	600	641	utr3
NM_001006035	855	896	utr3
NM_001006035	1031	1072	utr3
NM_001006037	1348	1389	utr3
NM_001006038	744	785	utr3
NM_001006042	1679	1720	cds
NM_001006042	1960	2001	utr3
NM_001006045	955	996	utr3
NM_001006048	969	1010	utr3
NM_001006052	1100	1141	utr3
NM_001006055	834	875	utr3
NM_001006057	933	974	utr3
NM_001006057	987	1028	utr3
NM_001006076	2550	2591	utr3
NM_001006082	854	895	utr3
NM_001006082	989	1030	utr3
NM_001006084	641	682	cds
NM_001006086	2153	2194	utr3
NM_001006088	1198	1239	utr3
NM_001006093	657	698	utr3
NM_001006093	713	754	utr3
NM_001006094	1219	1260	utr3
NM_001006094	1469	1510	utr3
NM_001006096	1232	1273	utr3
NM_001006098	1083	1124	utr3
NM_001006105	698	739	cds
NM_001006105	1426	1467	utr3
NM_001006663	989	1030	utr3
NM_001006663	1183	1254	utr3
NM_001006663	1316	1357	utr3
NM_001006663	1530	1571	utr3
NM_001006663	1580	1621	utr3
NM_001007032	7117	7158	cds
NM_001007032	8056	8097	utr3
NM_001007051	1544	1585	cds
NM_001007051	1908	1949	utr3
NM_001007051	2309	2350	utr3
NM_001007051	2385	2426	utr3
NM_001007051	3109	3150	utr3
NM_001007055	833	874	utr3
NM_001007055	1022	1063	utr3
NM_001007055	1071	1112	utr3
NM_001007055	1145	1186	utr3
NM_001007055	1203	1244	utr3
NM_001007055	1270	1311	utr3
NM_001007059	247	288	cds
NM_001007059	396	437	cds
NM_001007059	579	620	utr3
NM_001007060	1731	1772	utr3
NM_001007060	2284	2325	utr3
NM_001007061	734	775	utr3
NM_001007061	1159	1200	utr3
NM_001007061	1260	1301	utr3
NM_001007063	231	272	utr5
NM_001007063	3757	3798	cds
NM_001007063	4238	4279	utr3
NM_001007063	4409	4450	utr3
NM_001007063	4468	4509	utr3
NM_001007063	4567	4608	utr3
NM_001007063	4774	4815	utr3
NM_001007063	4833	4874	utr3
NM_001007063	4913	4954	utr3
NM_001007063	4991	5032	utr3
NM_001007063	5143	5184	utr3
NM_001007120	245	286	cds
NM_001007120	682	723	cds
NM_001007120	1919	1960	cds
NM_001007120	2323	2364	utr3
NM_001007120	2494	2535	utr3
NM_001007120	2598	2674	utr3
NM_001007120	2768	2848	utr3
NM_001007135	563	604	cds
NM_001007135	743	784	cds
NM_001007135	1415	1456	cds
NM_001007135	1748	1789	utr3
NM_001007135	1800	1841	utr3
NM_001007135	1864	1905	utr3
NM_001007135	1952	1993	utr3
NM_001007135	2654	2730	utr3
NM_001007135	2780	2821	utr3
NM_001007135	2890	2931	utr3
NM_001007136	1543	1584	cds
NM_001007136	1628	1669	cds
NM_001007136	1887	1928	cds
NM_001007136	2138	2179	cds
NM_001007136	2807	2848	cds
NM_001007136	2896	2937	utr3
NM_001007136	3022	3063	utr3
NM_001007136	3073	3114	utr3
NM_001007153	1106	1147	cds
NM_001007159	1847	1888	utr3
NM_001007159	2056	2097	utr3
NM_001007161	772	813	utr3
NM_001007161	833	874	utr3
NM_001007161	915	956	utr3
NM_001007161	1208	1249	utr3
NM_001007161	1424	1465	utr3
NM_001007161	1743	1784	utr3
NM_001007168	559	600	cds
NM_001007168	1005	1046	utr3
NM_001007175	1005	1046	cds
NM_001007175	1174	1215	cds
NM_001007175	1832	1873	cds
NM_001007175	4168	4209	cds
NM_001007175	4222	4292	cds
NM_001007183	657	698	cds
NM_001007183	1905	1946	utr3
NM_001007183	1962	2003	utr3
NM_001007183	2125	2166	utr3
NM_001007183	2294	2335	utr3
NM_001007183	2345	2386	utr3
NM_001007183	2406	2447	utr3
NM_001007186	594	635	cds
NM_001007186	645	686	cds
NM_001007186	921	962	utr3
NM_001007186	1138	1179	utr3
NM_001007199	1852	1893	cds
NM_001007207	536	577	cds
NM_001007207	964	1068	cds
NM_001007207	1580	1621	utr3
NM_001007207	1881	1962	utr3
NM_001007290	1693	1734	utr3
NM_001007290	1779	1820	utr3
NM_001007295	4274	4315	utr3
NM_001007296	1356	1397	utr3
NM_001007300	126	167	cds
NM_001007307	42	83	utr5
NM_001007307	232	273	cds
NM_001007307	1920	1961	cds
NM_001007307	2097	2138	cds
NM_001007307	4789	4830	utr3
NM_001007307	4908	4949	utr3
NM_001007309	885	926	cds
NM_001007309	1706	1747	utr3
NM_001007309	1981	2022	utr3
NM_001007311	318	359	cds
NM_001007311	964	1005	utr3
NM_001007311	1077	1118	utr3
NM_001007313	1498	1539	utr3
NM_001007313	1570	1646	utr3
NM_001007313	1804	1845	utr3
NM_001007313	2026	2067	utr3
NM_001007313	2152	2193	utr3
NM_001007313	2205	2246	utr3
NM_001007313	2427	2468	utr3
NM_001007313	2940	2981	utr3
NM_001007313	3055	3096	utr3
NM_001007313	3273	3314	utr3
NM_001007313	3339	3380	utr3
NM_001007316	2339	2380	utr3
NM_001007318	2826	2867	utr3
NM_001007318	2891	2932	utr3
NM_001007318	3031	3072	utr3
NM_001007318	3105	3146	utr3
NM_001007318	3188	3229	utr3
NM_001007318	3852	3893	utr3
NM_001007318	3929	3970	utr3
NM_001007321	673	714	cds
NM_001007321	1378	1419	utr3
NM_001007323	1213	1254	utr3
NM_001007323	1581	1622	utr3
NM_001007323	1882	1923	utr3
NM_001007327	1146	1187	cds
NM_001007327	1244	1285	utr3
NM_001007327	1337	1378	utr3
NM_001007327	1574	1615	utr3
NM_001007327	1669	1710	utr3
NM_001007327	1825	1866	utr3
NM_001007327	1902	1943	utr3
NM_001007327	2198	2239	utr3
NM_001007327	2320	2361	utr3
NM_001007329	2719	2760	utr3
NM_001007329	3621	3662	utr3
NM_001007329	3748	3789	utr3
NM_001007329	3852	3893	utr3
NM_001007329	4384	4425	utr3
NM_001007330	3198	3239	utr3
NM_001007330	3953	3994	utr3
NM_001007334	1133	1174	utr3
NM_001007341	1429	1470	utr3
NM_001007343	2034	2075	utr3
NM_001007347	593	634	cds
NM_001007351	644	685	utr3
NM_001007351	727	768	utr3
NM_001007351	949	990	utr3
NM_001007353	502	543	cds
NM_001007353	950	991	utr3
NM_001007354	517	558	utr3
NM_001007354	610	651	utr3
NM_001007359	2	43	utr5
NM_001007359	437	478	cds
NM_001007359	643	684	cds
NM_001007359	786	864	utr3
NM_001007359	947	1028	utr3
NM_001007359	1129	1170	utr3
NM_001007359	1723	1764	utr3
NM_001007361	1009	1050	cds
NM_001007364	452	493	cds
NM_001007364	931	972	utr3
NM_001007364	1040	1081	utr3
NM_001007367	1548	1589	cds
NM_001007369	2111	2152	utr3
NM_001007369	2712	2753	utr3
NM_001007369	2857	2898	utr3
NM_001007369	2909	2950	utr3
NM_001007375	531	572	cds
NM_001007375	636	711	utr3
NM_001007375	725	766	utr3
NM_001007375	807	848	utr3
NM_001007381	1553	1594	utr3
NM_001007382	1084	1125	utr3
NM_001007382	1179	1220	utr3
NM_001007383	1053	1094	utr3
NM_001007392	121	162	cds
NM_001007392	495	536	cds
NM_001007392	835	876	utr3
NM_001007401	1718	1759	utr3
NM_001007402	641	682	cds
NM_001007403	19	60	utr5
NM_001007404	1528	1569	utr3
NM_001007406	2281	2322	utr3
NM_001007406	2389	2430	utr3
NM_001007407	1924	1965	utr3
NM_001007407	1979	2020	utr3
NM_001007409	1652	1693	utr3
NM_001007410	37	78	utr5
NM_001007410	701	769	cds
NM_001007410	2103	2144	cds
NM_001007410	2191	2232	utr3
NM_001007410	2468	2509	utr3
NM_001007411	1515	1556	utr3
NM_001007411	1817	1858	utr3
NM_001007411	1967	2008	utr3
NM_001007411	2084	2125	utr3
NM_001007416	1	42	utr5
NM_001007424	1153	1194	utr3
NM_001007424	1344	1385	utr3
NM_001007431	1925	1966	utr3
NM_001007431	1988	2029	utr3
NM_001007433	320	361	cds
NM_001007434	1355	1396	utr3
NM_001007439	2167	2208	utr3
NM_001007439	2243	2340	utr3
NM_001007442	1647	1688	utr3
NM_001007446	1465	1506	utr3
NM_001007446	1669	1710	utr3
NM_001007446	1717	1758	utr3
NM_001007446	1785	1826	utr3
NM_001007450	507	548	cds
NM_001007450	1153	1194	cds
NM_001007450	1863	1904	utr3
NM_001007452	338	379	utr3
NM_001007452	502	543	utr3
NM_001007452	670	711	utr3
NM_001007452	997	1078	utr3
NM_001007454	1580	1621	utr3
NM_001007456	380	421	cds
NM_001007456	753	794	cds
NM_001007456	1056	1097	utr3
NM_001007458	2724	2765	utr3
NM_001007766	1447	1488	cds
NM_001007766	1678	1719	utr3
NM_001007766	1761	1802	utr3
NM_001007766	1938	1979	utr3
NM_001007766	2037	2078	utr3
NM_001007766	2116	2157	utr3
NM_001007767	823	864	cds
NM_001007767	1530	1608	cds
NM_001007767	2034	2075	utr3
NM_001007767	2188	2229	utr3
NM_001007767	2314	2386	utr3
NM_001007767	2514	2555	utr3
NM_001007767	2911	2952	utr3
NM_001007770	849	890	utr3
NM_001007771	493	534	cds
NM_001007771	1435	1476	utr3
NM_001007771	1560	1601	utr3
NM_001007771	1745	1823	utr3
NM_001007771	1910	1951	utr3
NM_001007771	2136	2177	utr3
NM_001007771	2186	2227	utr3
NM_001007771	2297	2338	utr3
NM_001007774	350	391	cds
NM_001007774	652	693	cds
NM_001007774	725	766	utr3
NM_001007774	782	823	utr3
NM_001007774	899	940	utr3
NM_001007774	954	995	utr3
NM_001007774	1049	1090	utr3
NM_001007775	292	333	utr5
NM_001007775	385	426	utr5
NM_001007775	528	569	utr5
NM_001007775	952	993	cds
NM_001007775	1251	1292	utr3
NM_001007775	1384	1425	utr3
NM_001007775	1433	1474	utr3
NM_001007775	1569	1610	utr3
NM_001007775	1744	1785	utr3
NM_001007775	1859	1900	utr3
NM_001007775	1911	1952	utr3
NM_001007777	752	793	utr3
NM_001007777	939	980	utr3
NM_001007777	1489	1530	utr3
NM_001008400	3038	3079	utr3
NM_001008400	3096	3137	utr3
NM_001008576	228	269	cds
NM_001008576	323	364	cds
NM_001008576	1460	1501	cds
NM_001008576	1700	1741	utr3
NM_001008576	1912	1953	utr3
NM_001008576	2432	2473	utr3
NM_001008576	3509	3550	utr3
NM_001008576	3831	3872	utr3
NM_001008576	4215	4256	utr3
NM_001008576	4652	4693	utr3
NM_001008576	4805	4846	utr3
NM_001008578	2429	2470	utr3
NM_001008580	1073	1114	utr3
NM_001008580	1119	1160	utr3
NM_001008580	1204	1245	utr3
NM_001008580	1258	1299	utr3
NM_001008580	1391	1432	utr3
NM_001008580	1440	1481	utr3
NM_001008580	1726	1767	utr3
NM_001008580	1797	1866	utr3
NM_001008580	1946	1987	utr3
NM_001008580	2134	2175	utr3
NM_001008581	1163	1204	utr3
NM_001008581	1210	1251	utr3
NM_001008581	1356	1397	utr3
NM_001008581	1458	1499	utr3
NM_001008581	1523	1564	utr3
NM_001008581	1622	1663	utr3
NM_001008581	1685	1726	utr3
NM_001008581	1746	1787	utr3
NM_001008581	1856	1897	utr3
NM_001008581	1915	1956	utr3
NM_001008581	2050	2165	utr3
NM_001008581	2228	2269	utr3
NM_001008581	2299	2340	utr3
NM_001008583	1845	1886	cds
NM_001008584	2923	2964	utr3
NM_001008584	3067	3108	utr3
NM_001008585	1992	2033	utr3
NM_001008600	1405	1446	utr3
NM_001008602	843	884	cds
NM_001008602	1139	1180	utr3
NM_001008605	516	557	cds
NM_001008605	915	956	utr3
NM_001008605	971	1012	utr3
NM_001008605	1103	1144	utr3
NM_001008605	1275	1316	utr3
NM_001008605	1403	1444	utr3
NM_001008605	1599	1640	utr3
NM_001008605	1726	1767	utr3
NM_001008609	1196	1237	utr3
NM_001008609	1290	1331	utr3
NM_001008609	1335	1376	utr3
NM_001008609	1529	1570	utr3
NM_001008611	295	336	utr5
NM_001008611	380	421	utr5
NM_001008611	1071	1144	utr3
NM_001008615	377	418	cds
NM_001008615	612	653	cds
NM_001008622	2203	2244	utr3
NM_001008624	3068	3109	utr3
NM_001008624	3185	3226	utr3
NM_001008627	1389	1430	utr3
NM_001008627	1596	1637	utr3
NM_001008627	2208	2249	utr3
NM_001008634	947	1029	utr3
NM_001008634	1237	1278	utr3
NM_001008641	732	801	cds
NM_001008641	852	893	utr3
NM_001008641	1180	1221	utr3
NM_001008641	1351	1392	utr3
NM_001008641	1404	1445	utr3
NM_001008641	1739	1780	utr3
NM_001008643	839	909	utr3
NM_001008643	1046	1087	utr3
NM_001008643	1214	1255	utr3
NM_001008644	2394	2435	utr3
NM_001008644	3268	3309	utr3
NM_001008644	3501	3542	utr3
NM_001008644	3608	3649	utr3
NM_001008644	3893	3934	utr3
NM_001008644	3947	3988	utr3
NM_001008646	2923	2964	utr3
NM_001008650	2361	2402	utr3
NM_001008650	2594	2635	utr3
NM_001008650	2768	2809	utr3
NM_001008732	752	793	cds
NM_001008732	954	995	cds
NM_001008732	1725	1766	utr3
NM_001008732	1895	1936	utr3
NM_001008732	1973	2014	utr3
NM_001008732	2065	2106	utr3
NM_001008732	2210	2251	utr3
NM_001008732	2383	2424	utr3
NM_001008733	869	910	utr3
NM_001009596	852	893	cds
NM_001009889	1420	1461	cds
NM_001009889	1691	1732	cds
NM_001009889	1871	1912	utr3
NM_001009889	2032	2073	utr3
NM_001009889	2075	2116	utr3
NM_001009889	2148	2189	utr3
NM_001009891	1479	1520	utr3
NM_001009898	670	711	utr3
NM_001009898	750	791	utr3
NM_001009898	830	871	utr3
NM_001009902	927	968	utr3
NM_001009983	4	45	utr5
NM_001009983	1416	1457	utr3
NM_001009983	1551	1628	utr3
NM_001009983	1807	1888	utr3
NM_001009983	1889	1930	utr3
NM_001009983	2246	2319	utr3
NM_001009983	2685	2726	utr3
NM_001009983	2864	2905	utr3
NM_001009983	3122	3163	utr3
NM_001009983	3167	3208	utr3
NM_001009987	1036	1077	utr3
NM_001009988	4176	4217	utr3
NM_001009989	1270	1311	utr3
NM_001009989	1329	1370	utr3
NM_001009989	1600	1677	utr3
NM_001009989	2028	2069	utr3
NM_001009989	2078	2119	utr3
NM_001009989	2151	2192	utr3
NM_001009989	2278	2319	utr3
NM_001009989	2325	2366	utr3
NM_001009989	2576	2617	utr3
NM_001009989	2662	2703	utr3
NM_001009989	2779	2820	utr3
NM_001009989	2998	3039	utr3
NM_001009989	3934	4004	utr3
NM_001009990	1917	1958	utr3
NM_001012243	2335	2376	utr3
NM_001012250	813	854	cds
NM_001012250	863	935	utr3
NM_001012250	1420	1461	utr3
NM_001012250	1776	1817	utr3
NM_001012250	1883	1924	utr3
NM_001012304	316	357	cds
NM_001012304	367	408	cds
NM_001012304	1993	2034	utr3
NM_001012304	2171	2212	utr3
NM_001012304	2321	2362	utr3
NM_001012313	2541	2582	utr3
NM_001012316	320	361	cds
NM_001012366	2036	2077	utr3
NM_001012366	2268	2309	utr3
NM_001012366	2527	2568	utr3
NM_001012369	1434	1475	cds
NM_001012373	1039	1080	utr3
NM_001012373	1618	1659	utr3
NM_001012376	2312	2353	utr3
NM_001012383	1951	1992	utr3
NM_001012386	1076	1117	utr3
NM_001012386	1147	1188	utr3
NM_001012483	474	515	utr3
NM_001012483	1048	1089	utr3
NM_001012483	1160	1201	utr3
NM_001012483	1228	1269	utr3
NM_001012483	1628	1669	utr3
NM_001012483	1823	1893	utr3
NM_001012483	1923	1964	utr3
NM_001012483	2040	2081	utr3
NM_001012483	2196	2237	utr3
NM_001012483	2259	2300	utr3
NM_001012483	2302	2343	utr3
NM_001012483	2613	2654	utr3
NM_001012485	1666	1707	utr3
NM_001012485	1799	1911	utr3
NM_001012487	513	554	cds
NM_001012487	2891	2932	utr3
NM_001012487	3054	3121	utr3
NM_001012487	3207	3277	utr3
NM_001012487	3493	3563	utr3
NM_001012487	3642	3683	utr3
NM_001012487	3976	4017	utr3
NM_001012487	4171	4247	utr3
NM_001012487	4471	4512	utr3
NM_001012496	1487	1528	utr3
NM_001013260	406	447	cds
NM_001013260	807	848	utr3
NM_001013260	871	912	utr3
NM_001013260	1212	1253	utr3
NM_001013263	27	68	cds
NM_001013263	1133	1174	cds
NM_001013265	656	697	cds
NM_001013265	938	1042	cds
NM_001013266	617	658	cds
NM_001013266	731	803	cds
NM_001013266	2101	2142	cds
NM_001013266	2237	2278	utr3
NM_001013266	2326	2367	utr3
NM_001013266	2528	2569	utr3
NM_001013266	3510	3551	utr3
NM_001013266	3580	3621	utr3
NM_001013266	3726	3767	utr3
NM_001013266	3780	3821	utr3
NM_001013268	1359	1400	utr3
NM_001013268	1591	1632	utr3
NM_001013268	2018	2059	utr3
NM_001013270	2217	2258	utr3
NM_001013270	2384	2425	utr3
NM_001013270	2460	2501	utr3
NM_001013270	2591	2632	utr3
NM_001013270	2895	2936	utr3
NM_001013270	3132	3173	utr3
NM_001013270	3231	3272	utr3
NM_001013270	4361	4402	utr3
NM_001013271	1292	1333	cds
NM_001013272	1853	1894	cds
NM_001013272	1903	1944	utr3
NM_001013272	2002	2043	utr3
NM_001013273	3166	3207	utr3
NM_001013273	3454	3495	utr3
NM_001013273	3547	3588	utr3
NM_001013278	2208	2249	cds
NM_001013278	3086	3127	utr3
NM_001013280	1000	1041	cds
NM_001013287	1340	1381	utr3
NM_001013291	841	882	utr3
NM_001013300	2220	2261	cds
NM_001013309	2321	2362	utr3
NM_001013309	2428	2469	utr3
NM_001013316	838	879	utr3
NM_001013318	478	519	utr3
NM_001013326	1160	1201	utr3
NM_001013326	1381	1453	utr3
NM_001013331	3776	3817	utr3
NM_001013333	1003	1044	utr3
NM_001013333	1408	1449	utr3
NM_001013341	896	937	utr3
NM_001013341	1028	1069	utr3
NM_001013341	1107	1148	utr3
NM_001013341	1211	1252	utr3
NM_001013344	251	292	cds
NM_001013344	408	449	utr3
NM_001013344	503	544	utr3
NM_001013345	452	493	cds
NM_001013345	730	771	utr3
NM_001013345	839	880	utr3
NM_001013349	1326	1367	utr3
NM_001013349	1368	1409	utr3
NM_001013349	1433	1474	utr3
NM_001013349	1483	1524	utr3
NM_001013351	2198	2239	utr3
NM_001013351	2254	2295	utr3
NM_001013352	1101	1142	utr3
NM_001013443	198	239	utr5
NM_001013443	514	555	cds
NM_001013443	761	802	cds
NM_001013443	815	856	cds
NM_001013443	1872	1952	cds
NM_001013443	2864	2905	cds
NM_001013443	3057	3098	utr3
NM_001013443	3168	3209	utr3
NM_001013443	3331	3372	utr3
NM_001013443	3740	3781	utr3
NM_001013443	3851	3892	utr3
NM_001013443	3896	3937	utr3
NM_001013443	3967	4008	utr3
NM_001013443	4093	4134	utr3
NM_001013445	2293	2334	utr3
NM_001013455	432	473	utr3
NM_001013463	24	65	cds
NM_001013463	255	296	cds
NM_001013469	9	50	cds
NM_001013469	735	776	utr3
NM_001013469	1118	1159	utr3
NM_001013471	1008	1049	utr3
NM_001013475	1011	1052	utr3
NM_001013477	48	89	cds
NM_001013477	294	335	cds
NM_001013477	379	420	cds
NM_001013477	475	516	cds
NM_001013484	897	938	utr3
NM_001013484	1119	1196	utr3
NM_001013490	1856	1897	utr3
NM_001013490	2021	2062	utr3
NM_001013499	1479	1520	utr3
NM_001013504	276	317	cds
NM_001013504	775	816	cds
NM_001013504	1237	1278	utr3
NM_001013504	1324	1365	utr3
NM_001013505	1412	1453	utr3
NM_001013506	765	806	cds
NM_001013515	1766	1807	utr3
NM_001013515	1852	1893	utr3
NM_001013515	1958	1999	utr3
NM_001013517	485	526	utr3
NM_001013520	806	847	cds
NM_001013521	10	90	utr5
NM_001013521	130	171	utr5
NM_001013521	1489	1530	cds
NM_001013521	2190	2231	utr3
NM_001013521	2817	2858	utr3
NM_001013521	2862	2903	utr3
NM_001013521	2950	2991	utr3
NM_001013521	3022	3063	utr3
NM_001013521	3195	3236	utr3
NM_001013521	3388	3429	utr3
NM_001013521	4194	4235	utr3
NM_001013528	487	528	utr3
NM_001013533	240	281	cds
NM_001013533	426	498	cds
NM_001013533	872	941	cds
NM_001013533	1171	1212	utr3
NM_001013533	1316	1357	utr3
NM_001013533	1366	1407	utr3
NM_001013533	1467	1544	utr3
NM_001013533	1810	1851	utr3
NM_001013533	1923	1964	utr3
NM_001013533	2126	2167	utr3
NM_001013533	2322	2363	utr3
NM_001013536	166	207	utr5
NM_001013536	807	848	utr3
NM_001013536	1046	1087	utr3
NM_001013538	2505	2586	cds
NM_001013538	2604	2645	utr3
NM_001013538	2649	2690	utr3
NM_001013538	2694	2735	utr3
NM_001013538	2932	2973	utr3
NM_001013538	3069	3110	utr3
NM_001013538	3187	3228	utr3
NM_001013538	3293	3334	utr3
NM_001013538	3372	3413	utr3
NM_001013538	3447	3488	utr3
NM_001013542	1288	1329	utr3
NM_001013542	1612	1653	utr3
NM_001013542	1765	1840	utr3
NM_001013542	1857	1898	utr3
NM_001013542	2615	2656	utr3
NM_001013545	747	829	utr3
NM_001013555	2658	2699	utr3
NM_001013555	2712	2753	utr3
NM_001013565	1778	1819	utr3
NM_001013566	780	821	cds
NM_001013568	1788	1829	utr3
NM_001013568	2035	2076	utr3
NM_001013572	1915	1956	utr3
NM_001013573	1864	1905	cds
NM_001014289	21	62	utr5
NM_001014289	83	124	utr5
NM_001014289	371	412	cds
NM_001014289	636	677	cds
NM_001014289	1070	1111	cds
NM_001014289	2323	2364	cds
NM_001014289	2909	2950	utr3
NM_001014289	2997	3038	utr3
NM_001014289	3372	3413	utr3
NM_001014289	3450	3558	utr3
NM_001014289	3641	3682	utr3
NM_001014289	3736	3816	utr3
NM_001014301	1870	1911	utr3
NM_001014301	2579	2620	utr3
NM_001014303	1143	1184	utr3
NM_001014303	1385	1426	utr3
NM_001014303	1885	1926	utr3
NM_001014304	2318	2359	utr3
NM_001014309	1363	1404	cds
NM_001014309	1407	1448	utr3
NM_001014309	1479	1552	utr3
NM_001014309	1679	1720	utr3
NM_001014309	1824	1865	utr3
NM_001014313	892	933	utr3
NM_001014314	1816	1857	cds
NM_001014314	2469	2510	utr3
NM_001014316	2006	2047	utr3
NM_001014322	2303	2344	utr3
NM_001014324	1577	1618	utr3
NM_001014324	1646	1687	utr3
NM_001014324	1729	1770	utr3
NM_001014324	2317	2358	utr3
NM_001014332	2966	3007	utr3
NM_001014332	3025	3066	utr3
NM_001014332	3101	3142	utr3
NM_001014334	978	1019	cds
NM_001014334	1672	1713	cds
NM_001014334	2004	2045	cds
NM_001014345	1849	1890	utr3
NM_001014345	1969	2010	utr3
NM_001014345	2027	2068	utr3
NM_001014345	2096	2137	utr3
NM_001014345	2208	2249	utr3
NM_001014345	2668	2709	utr3
NM_001014345	2771	2812	utr3
NM_001014346	2015	2056	utr3
NM_001014349	1624	1665	cds
NM_001014349	2285	2326	utr3
NM_001014350	1782	1823	utr3
NM_001014350	1836	1877	utr3
NM_001014350	2136	2177	utr3
NM_001014350	2278	2319	utr3
NM_001014350	2360	2401	utr3
NM_001014350	2516	2557	utr3
[truncated: 13,769 more rows]
