# Supplementary material for: RNA structural dynamics regulate early embryogenesis through controlling transcriptome fate and function
Source: Genome Biol. 2020 May 18;21:120. doi: 10.1186/s13059-020-02022-2 (PMC7236375; doi:10.1186/s13059-020-02022-2)
Supplement: Supplementary file 8 — Table S7. Maternal and zygotic gene sets categorized by gene expression and SNP. [file 13059_2020_2022_MOESM8_ESM.xlsx]

## Sheet: readme
Table S7. Maternal and zygotic gene sets categorized by gene expression and SNPs
SheetName	Desscription
“defined by expression”	Based on comparison of gene expression levels between 2 and 6 h.p.f., we categorized the genes into three groups: (i) genes with RPKM > 1 at 2 h.p.f., log2(FC) > log2(1.2) and FDR < 0.05 were defined as maternal decay genes; (ii) genes with RPKM > 1 at 2 h.p.f., log2(FC) < log2(1.2) and FDR < 0.05 were defined as maternal stable genes; (iii) genes with RPKM < 1 at 2 h.p.f. and RPKM > 1 at 6 h.p.f…
defined by SNP	The 3182 genes that are categorized by Harvey et al. Development 2013 and overlapped with our transcriptome reference

## Sheet: define by expression
maternal decay genes	maternal stable genes	zygotic genes
nasp	eef1a1l1	golga7ba
mid1ip1l	hnrnpa0b	sqlea
zgc:77112	khdrbs1a	tmeff1b
h1m	krt8	junbb
cldnd	marcksl1b	pipox
hspa5	ccnd1	myl9a
cldng	anp32e	slc25a16
acp5a	actb1	smad9
h2af1al	hspb1	apoeb
slc16a3	hnrnpa0l	ndufa1
buc	pnrc2	si:dkey-286j15.1
ccna1	si:ch73-281n10.2	aldh9a1a.2
gmnn	hspa8	nfe2l1b
dnmt1	h3f3a	smad7
cth1	hnrnpaba	jdp2b
nanog	actb2	efnb3b
zgc:77118	hmgb2a	zgc:172106
lsm14b	srsf5a	znf1137
map1lc3c	zgc:158463	tph1b
btg4	mid1ip1a	si:cabz01069013.3
zgc:56231	ptmab	trim55a
mylipa	rplp0	prss1
sox19b	anp32a	dpysl5b
hyou1	hnrnpa0a	txnipa
zgc:162879	anp32b	slkb
lamp2	hnrnpa1b	kars
si:ch211-132b12.8	ewsr1a	ergic3
mknk2a	pfn1	cald1a
mkrn4	zgc:92066	lrwd1
ccnb2	ppl	nfkbiaa
thy1	dynll1	anxa1a
siva1	cirbpa	phlda2
gtf3ab	marcksl1a	mfge8b
org	cx43.4	kcnj11l
uchl1	rps2	foxo3b
zgc:152986	npm1a	hexb
ctss2.1	tpt1	usp6nl
pif1	slc3a2b	gpt2l
bmb	hsp90ab1	skib
pdia4	nucks1b	zgc:174696
ca15b	tmsb4x	nrxn2b
pfn2	zic2b	dpf1
slbp2	serbp1a	meis3
zgc:114130	rps8a	boka
gdf3	nucks1a	zgc:91944
slc25a25a	top1l	b2m
ppdpfb	rplp1	zgc:194627
spsb1	cnbpb	dhrs3b
plk1	rpsa	st5
calr3a	eef2b	zgc:163061
coil	sfpq	cyp2p8
mepce	ewsr1b	zgc:162730
mcm3l	ak3	faah2a
jpt1b	ctsc	ptgs2b
dnajc5ga	ctnnb1	dnali1
dnajc1	rpl26	zgc:85944
rbpms2b	slc25a5	plvapb
dazl	ved	mgst1.2
fbxo43	fzd7a	ctss2.2
kpna7	hnrnpub	spra
cd82b	cebpb	pfkfb3
vldlr	igf2bp1	znf414
mos	snrnp70	rab11fip3
zgc:55413	mplkip	znf1077
pik3r3b	ctsla	zgc:173705
rcor1	thrap3b	ppp1r10
rpain	rpl4	eif4h
pabpc1l	rps3	si:dkey-11f4.16
nek2	khdrbs1b	slc28a1
trim36	acin1b	tnfaip2a
gstp1	rps4x	rnft2
si:ch211-137a8.2	rpl7	celsr2
chac1	id1	her2
raver1	rps15a	pnocb
naa15b	rpl7a	fn1b
zgc:123010	rps6	ctsk
caprin2	marcksb	bambib
gtf2a1	ilf3b	rpl17
zgc:113424	safb	bik
ccnb1	hmgn2	bbs10
ckap5	setb	dsc2l
phax	ran	sort1b
btg2	hsd17b12a	wu:fc47e11
hirip3	atf4a	tdg.1
tbp	lmnb2	znf1001
fhdc3	seta	smarcd3b
erlec1	rps3a	parp16
sh2d5	mex3b	si:ch211-214p16.2
tatdn2	hnrpl	zgc:153018
trim35-29	ptbp1a	cpt1aa
nap1l1	rbm4.3	etfdh
chia.4	ubqln4	hsp70l
hsp90b1	hnrnpabb	efemp2b
brdt	lama1	ttc4
rtkn2a	srsf1a	zgc:110796
lnpa	mych	dync1i1
prkcda	rps7	nkx3.2
ctsba	nop2	ptpn22
rrbp1b	sox11a	abcc5
pabpn1l	cdh2	mao
tacc3	znf185	stx11b.2
hmgcs1	ywhaqb	fth1b
lrrc59	zgc:114188	si:dkey-14k9.3
klhdc10	rhoab	zgc:65851
st3gal5	rpl27	bmp7a
lnx2b	rpl36a	otop1
slc35f2	fubp1	ier5
lmnl3	uba52	ccl19a.2
syvn1	rpl3	znf1113
si:dkey-208k4.2	hmgn7	gpat3
ndel1b	ptbp1b	hsd17b2
tmub1	perp	zgc:165555
zfand5b	hnrnpm	nqo1
cdc25b	rpl13a	znf1041
mycla	hmgb3a	ip6k2b
ciarta	rpl23a	trpm5
cnot8	rpl21	slc16a6a
mknk1	ptp4a1	si:ch211-284e13.9
dctpp1	cst3	dpp7
arntl1a	rps27a	fam166b
zgc:111868	ccne2	grk4
setd4	camsap2a	anks4b
zgc:103482	acer1	bin2a
sod1	ranbp1	eno4
zgc:112980	pfkfb4b	efnb2b
ccdc124	rpl39	slc52a2
bag4	rpl14	meis1b
ripor3	tcf3b	efs
zgc:195245	rpl35	cx52.9
dgcr8	si:dkey-67c22.2	dhtkd1
pi4k2b	rpl10a	cks2
larp6b	hes6	desi1a
nfs1	sec61a1	wu:fu71h07
orc6	pabpc1a	fzd9b
chsy1	bambia	zgc:194392
si:ch211-102c2.7	rpl10	eef1a1l2
fbxo34	rpl30	zgc:162171
bmi1a	rps29	acsl1a
slmapb	rhoaa	rspo3
orc1	rps5	acss2l
kif4	rpl13	sertad2b
fbxw2	nipblb	zgc:92360
zc3h15	rplp2l	cdon
lztr1	eif4a1a	phospho1
ccdc82	brd3a	zgc:85975
ska2	rps26l	si:dkey-97m3.1
zp3d.1	alox5b.3	ltb4r2a
exd2	hdac1	srsf9
xpo6	rps25	iqgap2
hbegfa	rpl35a	tbr1b
zar1l	rpl31	khk
ssx2ipa	tardbp	zgc:174888
ggnbp2	rps19	fam20a
zgc:92313	rps13	zgc:171551
ckbb	hmgb2b	myo5b
rnasen	tubb2b	cdh17
bmi1b	nrarpa	ptger4a
lsr	msgn1	LOC103910465
zgc:66443	srsf11	zgc:154164
zgc:158852	zgc:153665	cryba1l1
birc5b	rbm39a	cishb
pgk1	rpl5a	hmox1a
sinup	hnrnph1l	egln3
pycr1b	rpl37	ggcta
ell	arl6ip5a	ankrd9
csk	rpl8	pde6hb
zgc:92287	pou5f3	zgc:174314
spty2d1	sumo3a	parp6a
acadm	zgc:112994	zgc:173714
zdhhc18b	rps27.1	rbbp6
zgc:110239	rps24	si:ch73-52e5.2
pkma	rpl11	ier5l
tmem57a	rpl15	hmga1a
sytl4	fth1a	cnksr3
hk2	slc2a12	cthl
mtus1a	h3f3d	mat2ab
manf	hsp90aa1.2	zgc:112038
tpx2	pabpn1	ube2e2
scyl3	rpl28	cdc25d
setdb1a	srrm1	otomp
atp1b3b	si:ch211-157c3.4	tpm4a
ppp4ca	zgc:101846	gsk3b
tdrd1	smg1	gbx1
wdr62	hif1al	ftr82
rbm7	btf3	rdh8a
lrrc40	histh1l	lgsn
mob1bb	sptan1	cx35.4
thop1	hs6st2	arg2
snx10a	rpl36	sla2
bokb	gnl3	rab4a
ppp1r3b	rps28	ctnnd2b
cox17	h2afvb	rpp14
adipor1a	mgea5	si:ch211-214p16.1
pdik1l	ubr5	si:ch211-202h22.8
vps9d1	tgif1	arrdc3b
txnrd1	rps14	pnp5b
tubb4b	yy1a	rbp4l
anln	acsbg2	col28a1a
chek2	faua	zgc:153953
insra	si:ch211-191i18.4	fam43a
sept9a	atrx	zgc:100832
rnf168	rps15	her11
tbl1xr1b	rnf10	rab25a
si:dkey-11f12.2	tardbpl	tbc1d15
elac2	ube2v2	cyp2aa9
rras	cbsb	metrn
ing2	rhebl1	elovl6
ptp4a3	znfl2a	twist1a
dip2ba	rbmx	actn3b
znf326	tuba8l4	slc25a55a
zdhhc5a	nifk	gng12a
cxxc1b	rpl32	top2b
wasla	magi1b	scel
dtl	si:ch73-311h14.2	mcmdc2as
pinx1	prpf8	emp3b
chmp7	rps18	gucy2d
epc2	rps16	gadd45bb
dnaja3a	rpl38	znrf1
baiap2l1b	zgc:171772	s100a10b
ube2al	rpl18a	cyb5d1
si:ch211-244o22.2	u2surp	srgap2
mark3a	map1lc3b	si:zfos-1425h8.1
cdc14b	ncl	sult2st1
avd	si:dkey-156n14.5	phf21aa
hells	rps11	pck2
slka	jupa	ivns1abpa
ctu1	etv4	igf2a
bmp15	zfr	cyp2y3
cnot4b	hnrnpul1	si:dkeyp-80c12.7
cnep1r1	rps21	lpar3
atxn7l2b	sec61g	si:ch211-277c7.7
ctsz	cnn2	rnd2
dnm1l	ccnf	rasl10a
proser3	metap2b	aoc2
tspan36	ppiaa	zgc:114045
glipr2l	rasl11b	ubl3a
rab32a	lfng	large2
fkbp4	srsf2a	krt4
ociad1	bzw1a	klf7a
arhgef1b	akap8l	mmp14b
cdc20	eif1b	notum1a
epcam	rpl23	foxb1b
usp37	rps10	mcm3
plpp2b	tp53inp2	zgc:171509
prmt6	rpl34	cyyr1
rab35b	rbm8a	map1lc3a
entpd4	gpd1b	anxa1b
cyp17a1	si:dkey-251i10.3	znf1059
reep2	wee1	crfb17
lmo7b	map2k6	srsf2b
zgc:86764	snrnp200	tnnt2c
desi2	rpl9	zgc:174690
pgam1a	arid3b	zdhhc14
mcl1a	zgc:161969	klf17
march7	smarca4a	tcf12
hinfp	slc38a2	zgc:109986
papd5	mbd3b	cant1b
zgc:55733	btg1	ybx1
fxn	impdh1b	msantd1
cdc34a	itm2ba	zgc:91909
thoc3	hnrnpl2	ss18
nme2b.1	arpc5a	zgc:171887
si:ch211-129c21.1	gtpbp4	zdhhc15a
qtrt1	hnrnpk	rn7sk
neil3	rpl22	lypd6b
hsd3b7	nono	prelid1b
eomesa	srsf2b	wnt11
ctdnep1b	h2afy	mto1
zw10	zgc:77262	prlh
mastl	ilf2	xk
mettl16	rps27.2	gxylt1b
naa30	eif5	ptgdsb.1
si:dkey-72l14.4	glula	pcdh8
fam129ba	eef2a.1	kank2
calub	si:ch211-262h13.3	zgc:112334
chmp4c	rad21a	tmod4
pdcd7	rps20	si:ch211-197g15.10
fam117ab	rpl24	gabpa
map4k5	bms1	znf1119
zfand2a	slc30a1a	zgc:101559
si:ch211-173p18.3	znrf2a	atf4b
svila	rps23	aldob
dnajc18	kpna3	hnrpdl
zgc:73340	nsa2	ubtd2
asb8	ywhae1	trim63b
lrpap1	dnmt3bb.2	si:ch1073-443f11.2
picalma	kpnb1	tbl1xr1a
prelid3b	srsf4	ankrd6b
cpeb1b	nop53	cd82a
rnpepl1	sltm	zgc:174275
stk24b	syncrip	cnfn
dnajb12a	prpf39	plppr2a
asz1	slc38a5b	rgcc
tssc4	trnau1apb	map7d2a
gpsm2	tmem134	si:dkey-6n6.2
fbxl2	cyp2aa12	rgs4
nansa	rbm19	hnf1ba
rad18	cyp2aa8	zgc:100864
fam46c	fbl	ggctb
accs	lig3	si:ch211-195b11.3
rnf128a	si:dkey-23i12.5	zgc:153521
zdhhc18a	sall1a	fbxl7
aurka	eif5a	nt5c1ba
erap1b	eif4a2	zgc:174690
narf	pnn	znf1147
atl2	kcnk6	efna1a
s100a1	eif3d	lgals1l1
afap1l1a	matr3l1.2	nt5c2l1
klhl20	sf3b2	ramp2
herpud1	pcna	zgc:163040
dus3l	luc7l	ppa2
zgc:101744	ctcf	phkg1a
ncaph	csnk2b	kcnj13
rnf103	ddx21	atp1b1a
ezrb	ccng2	mif4gda
hif1an	pttg1ipa	irx1b
acat1	sart1	nrxn3b
ncoa4	eif3c	dhrs13a.1
hnrnpc	mki67	hsd17b14
tdp2b	hdlbpa	si:ch211-133n4.4
si:ch73-109d9.2	elavl1a	slc16a9b
gstm.1	slc43a2b	kcnk1a
hadhab	plekhj1	fzd10
ccne1	mllt1b	zgc:136683
bmpr1ba	smarce1	kif6
zgc:55461	rpl18	spry4
pxna	rpl19	sema4c
gys1	stard3nl	aqp9a
poll	hp1bp3	esm1
prkcsh	gnb1b	ccdc153
ppp2r5d	si:ch211-155e24.3	mpp1
mkln1	srsf6b	gp1bb
gpatch4	ncoa5	si:ch211-158d24.4
dnajb11	cxcr4a	dbx1b
ca7	ckap2l	rgs3a
tpi1a	rhov	zgc:194621
sh3bp5la	dek	bspry
grip2a	nfya	krt5
tmem11	dkc1	zgc:85777
dcun1d1	fzd7b	aqp11
stx4	slc43a1a	asap1a
si:ch211-188c16.1	tra2a	cyr61l2
tnfaip8l1	kctd5a	mfap2
lsm1	rps17	mogat3b
uvrag	rps9	dhrs4
sec24c	nr2f6a	nfil3-5
ppp1r14aa	eif4g1a	golim4b
got2b	h3f3c	adss
csnk2a2a	csnk1a1	ch25hl2
slc48a1b	hmgb1a	sox3
apex2	sfrp1a	krt97
pop4	slc25a3b	zgc:113436
tbc1d16	onecut1	gcnt4a
eif2ak1	tmem136a	sox7
fpgs	ddx39aa	mtmr1a
pdcd4b	si:ch211-114c12.2	zgc:110333
mindy3	cdkn1ca	aqp3a
haus6	snrpd1	si:dkey-75a21.2
kiaa0368	rnf19a	zgc:173619
tcirg1b	lrrc8c	atp1b2b
mcm6l	ddx39ab	cirbpb
snx1a	ubb	smo
p4ha1b	ddx5	cdkn1a
tmem51a	adprm	frem1b
gosr1	zgc:110425	mustn1a
f2rl1.1	dhx15	six3b
zbtb14	ywhabl	cyp2aa7
trip11	eif4g2b	tcima
rbfa	kpna4	cyp2p6
gpatch3	ptbp2b	igf3
uba3	fam133b	grnas
usp33	calm2b	selenop
galnt6	polr2b	polr3glb
rif1	zgc:110216	crygn2
pcnt	txnl1	gltpa
ctdnep1a	eif3s6ip	bbc3
zgc:153675	dnmt3ba	zic3
tlk1a	rpl5b	hoxb1b
lsm12a	nop58	si:dkey-204l11.1
hpf1	sf1	prkchb
apopt1	srrt	nt5c2b
sgut1	lyar	socs7
ncor2	ell2	zgc:113363
rogdi	si:dkeyp-2e4.3	def6a
gps1	rtca	tek
rap2c	ucp2	slc47a1
rrbp1a	ppp1r3cb	gata2a
osbpl7	rrp15	si:dkey-30c15.2
rfc1	fgf8a	ponzr5
arl4aa	ppig	sh3bp4a
LOC566907	eif3ba	nog1
acadl	taf15	chrna2a
atp5b	ddx23	tox
march6	srsf6a	hey1
cat	id3	pak7
nol8	cxcr4b	rln3a
prdm9	pak2b	osgepl1
tmem192	sec31a	sema6dl
pcm1	ubtf	slc25a1b
mrpl19	mmp30	msi1
pgp	si:ch211-214c7.5	prkacba
eif4ebp2	gnb2l1	slc27a2a
ppp1r13bb	glyr1	arhgef1a
camsap1a	gpr137	fkbp9
sptlc2a	cct4	nr5a1a
mcm10	cbx1a	metap2a
si:dkey-57a22.11	eif5a2	si:ch1073-376c22.1
dcun1d3	ppwd1	znf703
smek1	cfl1	enosf1
atp6v0a2b	zgc:174653	tesca
pibf1	bcl7a	hsc70
rpp25l	rap1aa	epha2a
rhot1a	ssb	crygmx
nectin3b	cox7c	chsy3
trmt11	rsl1d1	xylt1
tmem30ab	ppm1g	bcar1
papolg	dbf4	LOC569077
eno3	dimt1l	epha4a
ccdc22	slc3a2a	nfe2l1a
ankrd12	rpl27a	ghrhra
ccdc6b	mcm7	neu4
nsdhl	zgc:111986	oip5-as1
dnttip2	eif3s10	icn
prim2	gspt1l	tbx1
snx4	rps26	tbx6
smarcad1a	mapk8b	tcf15
fdps	tia1l	irx7
katna1	kpna5	slc47a4
golga5	appa	unc5b
zcchc7	yaf2	il21r.1
gyg1a	kdm2ba	ahcyl1
cry1ab	rpl12	pklr
stag2a	crnkl1	relt
stx11a	supt6h	zgc:92749
zgc:55781	ppp1r14bb	six4b
casd1	hnrnpa1a	zgc:92480
znf131	cyp26a1	vsig8b
hprt1l	tubb5	anks3
smarca2	ssbp3b	fosab
lipg	dusp16	pla1a
fan1	elovl1a	cdkn1ba
cdc27	gpatch8	frzb
haus5	ptbp2a	afp4
pus7l	snrpc	csf1a
mtch2	rbm5	cxcr3.3
ephb2b	rab1ab	zgc:113516
trmt12	ppp1caa	rpl22l1
lrrc42	fscn1a	krt91
ecd	rcc2	cyp2aa1
yipf1	slc20a1b	tnfsf13b
tmem144b	e2f8	si:dkey-204f11.64
cish	bccip	plod1a
ddx28	abcf1	erbb3a
ppp2r2d	clic3	her1
fam102ab	emg1	iqca1
lamp1	tpm4b	her9
sdccag8	rplp2	cacng2a
asmtl	hsf1	bhmt
zgc:153352	dsg2.1	entpd1
tdrd5	itpka	fb06f03
spint1b	api5	tnfsf10l3
tsc22d2	sumo3b	gcshb
mettl14	spry2	pkp3a
ercc4	efna1b	zfp36l1b
pdia3	ubap2b	ndr2
sgk3	agpat2	si:ch73-141c7.1
hmmr	csde1	zgc:112332
ndst1b	flot2a	flt4
rrp9	ube2na	eva1ba
stam	ppp1r3ca	cyp2aa3
det1	ralab	avl9
slc35c2	gsc	mgst1.1
stk38l	rbm25b	notum1b
zgc:162200	idi1	selenop2
zp3b	zdhhc9	vcam1b
supv3l1	cnot3a	zic2a
rgs14a	ppp1r14ab	fezf2
opa1	zbtb8b	ankrd31
si:ch211-262i1.6	gar1	sox2
cetn3	grpel2	myo1ca
tmem251	tm9sf2	zgc:56585
dnajc21	smc1al	si:ch211-51a19.5
fyna	mixl1	rpgrb
mpp7a	snrpb	zgc:158225
gig2o	sec61b	ptch2
bcl7ba	cnot1	ddah1
pafah1b1a	dact2	txn
gapvd1	scinlb	b4galt1
cuedc2	cd81a	fcer1gl
immt	zgc:162964	ddit3
zgc:152863	rbm4.2	samsn1b
kif2c	hmgb1b	pnp4a
cbx8b	lmo4a	spon2a
brip1	pbrm1l	dld
tipin	papss2b	her12
ipmkb	cth	si:dkey-43k4.3
chek1	nutf2	zgc:113229
gpr107	cirbpb	acy3.2
aurkb	zgc:153405	fmnl3
tbcc	eif4ebp3l	wnt5b
uevld	chd4a	apoc1
ticrr	zgc:136826	birc7
gnao1a	dynll2a	mxg
ide	wasf3b	si:dkey-33m11.6
coq8a	cyba	foxi1
nudcd1	rsl24d1	and1
arih1l	tiparp	rxrgb
chn1	shisa2a	rassf7b
arhgap10	ptges3b	nme5
mt2	skia	skilb
timeless	psma1	usp54a
dennd2db	srsf7a	mxtx2
ube3a	zgc:153115	pleca
cdk8	elf1	stmn2a
pus1	stard14	wnt3a
aifm1	ccdc137	zeb2b
ankha	kri1	si:ch1073-340i21.3
plpp5	her7	krt18
gcna	birc2	ribc2
dtnbp1a	hcfc2	gna15.1
metrnl	slc7a3	polr3gla
pak4	wnt8-2	ahsa1a
got2a	phactr3a	tll1
abcd3a	llph	kiss1
gtf2h1	rp9	zgc:158580
sgk1	sumo1	cdh6
zgc:162339	selenow1	chga
crsp7	pak1ip1	scn1ba
tmem53	erh	wwtr1
exo1	qkia	asap2b
kif3a	fkbp7	kcnv2b
ptpn4b	elovl7b	dzank1
paqr3a	diabloa	snd1
riok1	si:dkey-276j7.1	cyp3c3
dnd1	zgc:91910	plekhg7
ddit4	parp1	ripply2
rab5c	pim1	tbx2b
bin2b	dido1	dbx1a
hapln4	pik3ip1	her5
slc25a37	eif4ea	hrasls
slc25a10	zgc:63882	cdx4
gbgt1l4	itga5	lcn15
mboat2b	fnbp4	krt96
rp2	canx	mst1
slc30a9	fam3a	gpm6ab
mtfr2	serf2	wdr33
ints12	hnrnpd	zgc:114118
zgc:173548	otub1a	mycn
cfap97	znf1051	lgals3bpb
ddost	arl1	gpd1c
lonrf1l	ndfip2	tor4aa
mllt3	bmp2k	tuba1a
cpeb4b	oaz1b	ripply1
tuba4l	cdk11b	chchd3b
zgc:114041	pdcd11	gprc5c
ppme1	u2af1	lnx1
ppp1r3da	sap18	noxo1a
vapal	fam214a	pygmb
f3b	sat1a.2	zgc:110712
si:rp71-1g18.1	dhx9	si:dkey-239i20.2
evla	caap1	lgr4
arntl2	zgc:136892	pimr128
heatr3	fzd8b	cpe
tmx2b	sem1	styk1
tcf25	fut9b	tfap2c
atl3	znf1005	fam13b
lsm4	kdm1a	ephb3a
pcgf1	baz2a	ubtd1a
zmynd19	mrto4	hmga1a
prdx1	srsf1b	cdkl1
gemin8	LOC100150619	id4
otx1b	tspan7	nkx6.1
tnfaip1	msto1	syn2a
ltv1	arpp19a	arl4ab
zgc:110182	etf1b	si:dkey-7c18.24
cep57l1	rgs12b	hmga1b
park7	mvp	dkk3b
smcr8a	caprin1a	depdc7
prpsap2	pcf11	cuedc1a
cpox	zgc:136308	fbp1b
dbr1	fbxl14b	klf13
prdx2	znf1117	si:dkey-28b4.7
tmem110	slc16a1b	zgc:113135
fbxo5	snx8a	lgalsla
dvl3a	snrpf	olig4
zgc:112083	mbpb	lft1
fmr1	u2af2b	cyp2x6
paxip1	arf1	vgll4l
emc6	kras	si:dkey-273g18.1
atad1a	tpm3	fgf2
pim3	e2f4	vcana
otud4	ube2e1	msx1a
maea	tsr1	apoa1b
chmp4ba	prps1a	si:dkey-4p15.3
gtf2e2	msl2a	zgc:163121
zp3.2	ddx18	ybey
unc119b	sephs1	prdm1a
slc25a28	asph	gdpd3a
ccnh	tcta	sb:cb92
paip1	znf800b	adora2aa
adnp2a	ywhaz	zgc:174862
dolpp1	ch25hl1.1	nfe2
tmcc1b	lrp6	zgc:153702
gmcl1	si:dkeyp-113d7.1	rasd1
castor1	arf2a	sox19a
phf6	puf60a	LOC799523
sms	rap2b	gzm3.4
dph1	uqcrh	chka
tsc1a	psmd4b	nt5c2a
naxe	sdcbp2	asb5b
rnf180	eif4a3	mipb
atp5g1	sae1	si:zfos-1011f11.1
parn	yeats4	znf1070
wdr76	cct3	spns3
lysmd3	hnrpkl	esrp1
zgc:174906	supt5h	cremb
ical1	irf2a	bicc2
rab20	sh3d19	cldne
itm2cb	noc3l	zgc:112234
aldh7a1	mapre1b	s1pr5a
wdr48b	snrpa	acsm3
myof	hectd1	nansb
cdc16	krr1	gfi1aa
lima1a	pogzb	adora2ab
parpbp	sall4	si:ch211-126g16.11
yipf5	natd1	plxdc2
rabgef1	u2af2a	aplnra
ccm2	tcf7l1a	hlx1
abhd17c	rbl1	nipal4
katnbl1	zgc:92045	actc1a
st3gal3a	snai2	LOC565422
ap1s3b	fkbp1aa	cldnb
arfip2a	clk2a	vmo1a
zgc:66440	cdcp1a	mbnl1
retsatl	neurl1ab	apoa1a
haus4	sumo2b	smtnl1
ccna2	psma4	rab34a
aldh16a1	tmcc3	gfpt2
brf2	ano9a	nox1
lactb	srrm2	si:ch211-131k2.3
pex1	slc9a2	osr1
ppp4r2a	zgc:174938	timp2b
tes	tma7	ripk1l
snupn	nme3	slc38a4
smim12	cdv3	rab11fip4a
cebpg	abce1	syn1
ppan	eif3k	zgc:153219
mysm1	slc4a4a	acot19
calm3a	cst14b.1	irx3b
mrpl28	arrdc2	bnipl
axin1	eif2s2	otx1a
nsmce4a	nop10	nnr
asf1ba	fuca1.1	rnd1b
atp2a2a	zgc:153911	grk5
nudt17	srsf5b	slc25a23b
smim14	eif3f	pkd2
tk1	chmp6b	fgf24
zgc:113054	lypla2	pcdh20
sybu	si:dkey-57k17.1	foxa2
mtx1a	si:ch73-46j18.5	msx2a
pdss2	dynll2b	ctsh
ap1m2	zgc:174263	LOC107195253
fen1	rdh10a	pcp4l1
cmpk	nr2c1	p2ry11
creld2	ubap2a	rps12
orc3	kdm2aa	cebpd
gtpbp1	si:ch211-286b5.5	zgc:174680
pank4	unc45b	hhex
gsto2	zc4h2	tmsb1
coq3	psmb7	ctns
irf6	blf	lmo2
cep83	fus	dnase1l4.1
smarcc1b	brd7	zgc:193505
ptgesl	si:ch1073-325m22.2	iqch
alg1	edf1	dennd2da
egln1b	si:ch211-195b13.1	vox
pdia6	stap2b	zgc:110626
ppp1r12c	cenps	mylz3
mat2b	cox8a	tac1
zgc:162592	skp1	slc40a1
ccdc61	ephb4a	lxn
chp1	nipsnap1	cxcl12a
clns1a	hsp70.3	trabd2a
fbxo30b	ptmaa	paqr5b
ttc13	arhgap12a	fam234b
ube3c	snrpd3l	dact1
abhd18	zgc:174646	ugt5a5
zgc:101765	ptgdsb.2	lrrc15
p4hb	ybx1	ednraa
rell1	mybbp1a	lcat
tmed9	bub3	stm
stt3b	paics	cmtm7
znf1014	mbd3a	sp6
itgb5	zgc:113983	phlda3
faf1	nfyba	tagln2
mphosph6	mib1	add3b
ppp1r37	sar1b	slc16a8
mgat1a	eif1ad	ckmt1
sass6	mboat1	si:dkey-169i5.4
ptpa	ccdc84	scamp5a
zc3h7a	cpsf6	zgc:113135
uso1	leng8	cebpa
ildr1b	LOC108180085	chrd
mrpl12	ccng1	klf4
pold1	anxa6	cldn5a
nadkb	degs2	a2ml
wwc3	rnf220a	mapre1a
ccdc6a	xbp1	plk2b
phf23a	nadka	apela
cdc5l	gatm	znf1068
ctdspl2a	gng5	capn9
mcoln2	acap1	cart4
jtb	tcerg1a	gadd45ba
alkbh5	ccdc187	eps8l1
uros	prpf19	degs1
nhej1	dbi	dbnla
zbtb2a	rnf144b	ism1
heatr6	aqr	zgc:123035
laptm4a	ddx46	lpl
kif18a	eif3g	zgc:110699
zgc:77650	ssr1	fam212aa
sipa1l2	dhx16	wu:fa10h04
plekha1a	taf7	sult6b1
stard8	elob	zgc:195170
asf1bb	cbx3a	noto
dedd	dbt	si:dkey-11o15.10
myo6a	ctps1a	asb11
si:ch211-241e1.5	gatad1	net1
tgfbrap1	leo1	tbx16
porb	zgc:163077	si:ch73-160h15.3
sh3glb2b	amd1	gata3
krcp	h3f3b.1	aplnrb
copg2	znf292a	si:dkey-261j4.5
cry1bb	her6	bmp2b
si:ch211-119o8.6	lrig3	ackr3b
shcbp1	eef1g	ctsll
tmprss4b	rprd2a	mapk12b
snx9b	chmp1b	fgf17
vrk1	prpf4bb	isg15
aida	nop14	dusp6
fbxo32	pfn2l	lcp1
sh3rf1	arl13a	admp
sigmar1	rnf40	slc7a8a
nanos3	ipo7	prickle1b
im:7136940	zgc:174704	plekhf1
ascc2	lsm7	ier2a
si:dkey-180p18.9	rbm12	foxd5
uck2a	arhgap11a	fgfr4
LOC561325	ppp1cab	foxa3
si:ch73-382f3.1	nsun5	ier2b
rab18b	hmga1a	alcamb
rybpa	marcksa	mxtx1
sdf4	mgaa	ta
stx5a	atp5g3a	si:dkey-85k7.7
sh3gl3b	rabac1	lft2
lhx8a	zgc:158868	tagapa
poldip2	pdhb	foxd3
trip4	ywhaba	krt92
taf6l	ifi30	si:ch73-110p20.1
si:dkey-13i19.8	arl13b	has2
josd1	ctnnbip1	vsir
jmjd6	pno1	e2f7
zdhhc6	tcea1	si:dkey-14d8.6
glrx5	fam83hb	gadd45aa
abraxas2a	s100s	foxb1a
pja2	gatsl2	klf2b
arfgap3	aldoaa	kazald2
ca10a	alpl	si:ch211-170d8.2
mier2	smarcd1	zgc:101640
elavl2	pes	tnfaip8l2b
dirc2	supt16h	morc3b
fam210b	zgc:153713	sesn3
si:ch211-69g19.2	ahi1	dharma
eif4e3	kdm5bb	rasgef1bb
zgc:163014	srp9	sox32
rbbp8	ndufs6	dkk1b
mier1b	actn4	fzd8a
mtr	purbb	zgc:174710
emc7	gas1b	rgma
itprip	spred2b	zgc:194330
sufu	myl12.1	jun
zgc:66474	adssl1	her8a
arhgap4a	hypk	mcm6
wasf2	golph3l	si:ch211-92l17.1
amfra	luc7l3	vent
prkcha	rtf1	spag1a
b3galt2	sf3a2	b3gnt5a
sgsm3	cirbpb	pth1b
spop	polr2k	rnf183
brf1a	zgc:123068	grhl1
ndfip1	aif1l	crabp2b
zgc:101016	pggt1b	tpbga
exoc6b	ndufa5	flrt3
ccdc102a	rnps1	evpla
zgc:153867	nrarpb	LOC101887113
atrip	ccnb3	si:dkey-48g21.7
map7d1a	LOC558044	zgc:136353
ppp6c	zgc:101783	fgf3
tpm1	eif2s3	lpar6a
fkbp2	ldb1a	fzd4
dok1b	sf3b6	slc13a4
chd1l	cnbpa	gata5
spice1	rassf1	sagb
zgc:66483	si:ch211-22i13.2	im:7138239
fancf	si:ch211-163l21.7	LOC567472
adcy5	adrm1	mgll
pgm2l1	flot1b	itpk1a
tbrg1	calm3b	zgc:112302
efcab11	smad6a	spns2
otulinb	ppp3r1b	gngt2b
ypel3	pim2	hnf4a
neil1	psmb6	map7d1b
trim35-27	med12	fa2h
tmem246	actl6a	cyp2aa4
gfer	ube2l3a	ptgs2a
plcd1b	si:ch211-51e12.7	slc43a3b
fbxo25	mgst3b	ppih
atg3	zgc:77041	crestin
cnpy1	picalmb	cldnf
exosc9	prdx5	slc14a2
rab13	mespaa	sp5a
mars	ubxn1	aep1
ube2z	spred1	cldnc
chfr	ddx5	zgc:194210
bag5	zdbf2	nr0b2a
elac1	ppp2r1ba	zgc:174698
gnai2b	zbtb12.2	mapkapk3
qrsl1	nhp2	mttp
mink1	elovl7a	si:dkey-103d23.5
pdpk1b	dhx38	ela2l
lpcat1	pxk	si:dkey-261j4.3
tubgcp5	tmem154	arl11
atp5a1	dram1	h1f0
abhd16a	ino80b	atp1b3a
tmco1	yap1	timd4
cyb5r1	ing4	cyp24a1
zgc:153345	helz	ankrd34bb
dia1b	clint1a	rpz5
thumpd3	smu1a	gadd45ga
slx1b	uqcrb	anxa2b
alg13	bnip4	slc26a1
mapk14b	atp2b1a	zgc:158773
si:ch73-352p4.5	zgc:173619	si:dkey-56d12.4
ttc9c	thoc2	pitx2
golga1	zgc:101716	gpr34b
trmt61a	lamc1	slc25a47a
ddb2	agfg1b	zgc:91849
os9	ndufa3	cavin2b
ap1b1	selenof	prph
gosr2	gdi2	cyt1
st6galnac1.2	scocb	p4ha2
aurkaip1	rnaseh2c	dnase1l4.2
wipf2b	pcbp2	tlr4ba
siah2l	klf3	krt17
zgc:66479	amotl2a	stx11b.1
mdh2	riox1	bcar3
ppp4cb	zswim8	mpz
stx8	mmp9	zgc:136538
exoc3	nat9	arrdc3a
tdrd7a	ythdc1	cyp27c1
haus3	papola	akap12b
zgc:162344	h2afx	sebox
surf6	pum1	sp5l
myclb	upf1	epyc
cry-dash	mak16	pvalb9
mier3b	vamp3	spry1
ilvbl	mospd2	serpinb1l4
mkrn1	zgc:113176	fkbp1aa
chuk	rab25b	si:dkey-188h10.3
yme1l1b	vdac1	frs2a
get4	gli1	ms4a17a.17
cope	dusp11	gnai1
si:ch211-223m11.2	sf3b4	szl
wdr4	tp53bp2a	apoa4b.2
cdk2	zgc:56304	zgc:172014
dus1l	ndufa6	capn2b
chp2	nolc1	mapk11
crata	cct2	zgc:173624
ubr7	cox10	zgc:194282
cab39l	tbl3	si:dkey-33c12.3
mad2l1	esf1	ftr72
chtopb	trim44	si:ch211-107n13.1
xkr8.3	slc34a2b	scn4bb
tmf1	nudcd3	mat2al
fam129bb	wdr77	zgc:172136
cdca7a	aldh3b1	zgc:158445
gle1	ppil4	lhx5
plekha3	nom1	si:dkey-25e12.3
sfr1	itih2	smkr1
ciao1	wbp11	LOC107988037
fam110b	rbm34	si:ch211-156j16.1
bora	nucb2a	psmb8a
snrnp35	znf1124	slco1d1
cx44.2	c1galt1c1	slain1b
ankrd22	pitpnbl	exorh
arcn1b	si:dkey-33c12.4	slc16a10
nelfa	cenpe	serpinh1b
zgc:158270	psma8	il23r
rhogc	pfas	her3
polr3d	ccar1	LOC107197950
hps5	bmpr1aa	crabp2b
nrbp1	elf2b	tmem30c
timm10b	snw1	si:ch211-151h10.2
stx12	ppp2r2ab	si:dkey-88n24.5
ptk2ab	zgc:91860	cry1aa
march5l	arpc2	cpn1
prkcbb	arhgap42a	plcd1a
pho	ift20	polr3gla
gcfc2	sostdc1a	abca1b
jpt2	eif4ebp3	ms4a17a.6
skiv2l2	ubap2l	srsf3b
arl6ip5b	cnn3a	lamb1a
fbxw11b	nlk1	tgfbr1b
armt1	dmxl2	slc24a5
ppp1r2	si:dkey-222f8.3	rgs5a
dennd6b	midn	LOC100001550
tmem41aa	arf6b	ftr83
vps51	panx1a	ftr39p
si:ch211-116o3.5	notch1a	zgc:123060
tom1l2	mrpl57	igfbp1a
rpp38	arglu1a	cirbpb
thap7	rnf11a	LOC571123
aldh3a2a	trim71	tmsb
med13b	mtdha	erbb2
zgc:113149	cox16	cblc
si:ch211-14a17.7	hcfc1a	trpm4a
zglp1	cyp2p7	hs1bp3
tbpl2	insb	slc7a2
m6pr	rad23b	zgc:110353
btbd9	zgc:77056	si:ch211-130m23.2
ptgr1	lhx1a	notch3
msi2a	gli2a	dnajb14
zgc:55262	banf1	snai1b
irf5	pdcl3	bmper
pdap1b	txndc15	gem
dnajc2	dcp2	mxa
lmf2b	zgc:152816	naca
cog4	tspan18b	zgc:112970
eif3ja	wsb1	si:ch211-165d12.4
si:dkey-114g7.4	hip1rb	si:rp71-36n21.1
ube2d3	ddx47	tnfb
snrka	taz	cldna
slc30a4	tulp4a	mdka
sdf2	snrpd2	si:dkey-122c11.1
slx4ip	polr2gl	krt1-c5
zgc:158403	si:rp71-1c23.3	cyt1l
polr3e	zmat2	tspan9b
usp1	ube2d1b	rpe65b
zbtb8a	maff	si:dkey-221l4.10
atpaf2	srp19	cort
zc3hc1	zgc:66447	clk4b
heatr5a	apip	pcnp
yrdc	dpy30	snap25b
mrpl48	cmtm6	alox12
slc7a6os	cfap100	si:ch211-222f23.6
fbxo45	s100u	znfl1
uspl1	katnal1	fblim1
gins3	si:dkey-238o13.4	sall3b
psmd11a	hcfc1b	foxj1a
atg101	si:ch211-110p13.9	rpe65c
qtrt2	ppm1da	tfa
tmem161b	ilf3a	gata6
gale	si:ch211-216l23.2	tbx6l
zgc:153499	odc1	eve1
fancg	tuba8l	zgc:100868
gdf9	ppp5c	p4ha1a
ppp1r15b	pphln1	grk7b
selenos	tcp11l2	cryba4
preb	gfpt1	si:ch211-168h21.3
nemp1	gpc4	pimr136
ppil2	pdcd10b	si:busm1-105l16.2
ldhba	selenon	eppk1
mettl21a	cct6a	mal2
chic2	imp4	alas2
tubgcp2	odf2b	smtnl
eci1	b4galt4	zgc:123295
ppp2r5ea	si:dkeyp-80c12.10	hk1
ehmt1b	b3gnt2b	apoc1
tceanc2	ssrp1a	serpinh1b
vps26a	zgc:153409	im:7152348
slc27a1a	supt4h1	thbs3a
kank1b	asns	cyp2k8
ccnq	fkbp1aa	zgc:194202
cdc37l1	pi4kb	stmn4l
slc25a1a	paip2b	si:ch211-197h24.9
ptcd3	ywhabb	plekho1b
foxj3	zswim5	si:dkeyp-98a7.1
dpp9	hnf4b	sh3bgrl
dtymk	mthfd2	anxa1c
scarb1	fam32a	si:dkey-63j12.4
fam45a	pabpc1b	npb
golt1bb	polr2f	serpinh1a
sepsecs	ncor1	fut9d
hexdc	micu2	tfec
rmnd5b	znf346	igf2bp2b
arcn1a	ezh2	card9
sdf2l1	dpm3	slc7a5
nln	mphosph8	galn
trappc6bl	cad	tmem106bb
piwil2	mpzl1l	fzd2
ube2g1a	ovol1a	agr1
mtfmt	znf207a	capn8
cdc45	atpaf1	pltp
pttg1	vrtn	pcdh18b
tmem106c	zfp36l1a	nr2f6b
oip5	wdr3	zgc:92630
prkrip1	zgc:113984	crtap
ythdf3	rnpc3	s100z
gins2	rbm39b	praf2
abraxas2b	namptb	serpinc1
homer3b	mid1ip1b	si:ch211-114l13.7
fam69aa	pgap3	creb3l3a
kti12	letm1	hhatlb
zyg11	atpif1a	spink4
zgc:165515	ube2d2	hesx1
gclm	bud31	lama4
alg5	atp6v0cb	pcdh10b
gb:eh507706	boc	tgm5l
rhoq	rps12	zgc:113442
cry2	arf5	si:dkey-71l4.4
cog2	zdhhc3b	cyp2k6
btbd3a	g3bp1	stat1b
pold3	spcs1	rbp7a
pdia5	gmps	tuba2
cebpz	adipor2	tfap2a
golph3	efhd2	ogfr
stip1	urahb	chpt1
ccdc130	psmd7	cyp2p9
zgc:158257	snrpg	soul2
aagab	bysl	tmem98
tradd	wtap	lmo7a
tab2	ino80	si:ch211-105c13.3
sestd1	edc4	kirrel3l
pik3cd	surf2	rac3a
zgc:113425	commd2	onecutl
ykt6	foxh1	col5a2a
cog3	chmp2bb	dlx3b
paxx	znf800a	efnb1
arl8ba	fkbp11	cyp2aa2
bzw1b	zgc:173816	prdm14
slc25a12	rbfox2	dlb
tm2d2	st8sia1	rltgr
zgc:77929	soul3	six7
wdhd1	nmt1a	angptl4
mtmr8	cdc26	zgc:101540
osbpl2b	si:ch73-234b20.5	mafb
umps	zfand5a	znf341
fkbp6	cyp51	lama5
ccnyl1	arrb2b	pmela
clpp	pdcd4a	apol1
mrps30	dhrs9	adam28
lpcat4	hikeshi	ftr83
slc35e1	arl4cb	si:rp71-36n21.1
fabp3	siah1	kcnk5a
mob3a	si:dkey-20i20.2	mfsd4ab
ppfia1	pbx4	camkk1b
nup35	twf1b	mical3b
rnmtl1b	baz1b	rab36
epb41l5	mrpl20	sox17
usp44	cep19	bmp4
ubap1	mff	nat8l
cdk5rap3	ndfip1l	abca1a
vamp4	si:dkey-15d12.2	mbpb
me3	chtopa	sid4
galcb	im:7148405	rbm47
klhl8	nup205	foxj1b
nufip1	rbbp6	zgc:77375
mnat1	keap1b	zmynd11
zmym4	rpl17	hrh3
si:dkey-7j14.6	sept2	dlc
ikzf5	si:ch211-195h23.3	LOC100329294
mtmr7a	msx1b	lhfpl2b
tram1	ndufv2	pla2g12b
cdip1	max	zgc:153284
dia1a	zgc:173720	rhbg
thap12b	zgc:113333	hkdc1
rapgef1b	asb12a	elk3
fbxl18	rpl29	foxc1a
tmc6b	dpf2l	mespab
hook2	elof1	lhx1b
si:ch211-175m2.5	hist2h3c	flvcr1
nap1l4b	atp5j2	prss59.1
nde1	mrps6	zgc:92380
dph3	rhbdl2	gadd45gb.1
osbpl9	ssuh2rs1	uox
amt	oaz1a	nedd9
wash1	zgc:174315	znf750
rfwd2	srsf3a	cyp11c1
jagn1b	zgc:100951	nr1i2
arl8	wdr55	plxnd1
igbp1	LOC100148466	art4
fam20b	rsrc2	fabp1b.1
ctu2	fam50a	slc5a12
hprt1	znf983	aldh1a2
hdr	dnajb12b	ext1c
xpc	ppp1r15a	sik1
mtif2	cndp2	sdr16c5b
eml2	plagx	fzd3a
acap3b	scamp2	si:ch211-191i18.2
prc1b	mrpl24	cahz
nck2a	cfap36	phyh
erlin2	polr2h	bach1b
ssr2	psmc6	nid1b
tmem184a	eif3i	hs3st1l2
wdr73	s100v2	tgm1l4
ninl	nsg2	col9a3
cax1	phc1	gb:eh456644
xrn2	rbm15b	efnb2a
smyd2a	ccni	spns2
mief1	msrb1a	dla
stk26	sik3	zeb1b
zgc:77880	abracl	tppp3
adad1	ss18l2	mdkb
snx27b	zgc:56676	rprmb
aldh18a1	cox7b	atp1b2a
tmed5	nsfl1c	otx2
clk2b	cherp	ptpro
pdcd6ip	si:dkey-16n15.3	rbp2a
spdya	phtf2	prph2b
stk35l	rsrp1	cryabb
trmt2a	adar	zgc:85843
dnmt3bb.3	mrpl42	si:dkeyp-72h1.1
gtpbp1l	raraa	lim2.2
phc2b	ergic2	mgp
tiprl	puf60b	msx3
rnf213a	szrd1	ugt1b5
rps6kal	LOC101885512	mthfd1l
wdr21	mta2	zgc:92590
snx18a	nxt2	npas4l
rpf1	bcl2l10	gngt2a
mon1a	gas1a	prss60.2
sec23b	myg1	cybb
hadhaa	LOC796180	abcc2
snx2	zgc:56699	tnfsf10l
lasp1	psmb5	ccdc125
med16	zgc:136864	fat1a
rab15	rab11a	cldnk
ncbp3	mtf1	apbb1ip
ppm1la	tuba8l2	tnni2b.2
topbp1	dgcr2	apoa2
fam210aa	ctr9	si:ch211-154o6.4
rnf181	chchd2	nrg1
zgc:91908	rpl7l1	glod5
cdca8	trip12	ptgdsa
hmgcl	akt2	zgc:194839
samm50	tnpo2	tbx3a
gulp1a	wls	col17a1a
adssl	dnajc8	prss60.1
zgc:136971	fnip1	acer3
ddx3a	eif3m	guca1a
gpr137c	sephs2	jph3
zgc:175066	spata6l	nebl
pola2	utp18	zgc:114181
akip1	zgc:112982	hmgn3
b3gnt5b	itgb1b	six4a
tsfm	dnase1l1	cdx1a
aifm2	gnl3l	gna14
smarcb1a	pmaip1	slc22a2
map3k7	slc35c1	tuft1a
gkap1	zgc:171459	sult5a1
ubtfl	selenow2a	shha
eri1	cox7a3	apoc2
stim1a	tnrc6a	twist2
sh3bp5b	mybl2b	adora1b
tdrkh	ube2nb	ugt1b6p
tnk2b	trim47	zgc:110283
rfng	ppiab	zgc:86586
rheb	lsm14ab	si:dkey-221j11.3
zgc:162816	rpe	nova2
hpdl	paf1	pkdcca
ccdc94	heatr1	gabra1
csnk1g2a	sbno1	pcdh19
polm	taf13	apobb.1
triobpb	prrc2a	baiap2l2b
ccdc106a	snrpa1	pls3
zgc:162948	psenen	myf5
nras	magoh	smad6b
cdc7	atp6ap1b	nrp2b
pex13	capza1a	fabp2
mipol1	strn3	pnx
scnm1	ankhd1	rab6bb
mcfd2	tfpt	zgc:136410
hspa9	abhd14b	npr3
cyp11a1	pknox1.1	gngt2a
acp7	gnsb	smad1
csnk1db	wwp2	phospho2
rpa1	dcbld2	col11a1a
bet1l	arhgdia	ugt1b7
peli1b	ccnl1b	col4a5
lysmd1	ets2	il6
suz12a	cd63	zgc:194887
zgc:66313	nfyc	crfb12
rhbdf1a	gmpr2	cd36
cep162	clstn1	myod1
tmem63a	klc1b	ugt1b3
btr16	mrpl32	ces3
mgat2	ptp4a2a	zgc:174153
zgc:113293	wdr5	zgc:112001
nsun4	rbm22	myrip
copz2	atp13a1	ppp1r14c
ldlrad4b	polr1b	sema4e
ube2d2l	dicp1.3-4	col1a2
mcmbp	smg5	phox2a
gfm1	cldn15b	fbn2b
parp12a	riox2	phc2a
syncripl	mrpl21	stc2a
pla2g6	cd2ap	dpys
alg3	capns1b	slc23a1
slc38a6	hif1ab	tcf7l2
ndrg3b	zgc:158803	si:ch211-229n2.7
tmem263	si:dkeyp-38g8.5	zgc:136870
polr3f	clk4b	ugt1b1
arl6ip1	inaa	apobec2a
nr2f1b	zgc:92242	zgc:112265
ctps1b	emc3	ugt1b4
cap1	si:ch211-241b2.1	asah2
hiat1a	snrpe	zgc:158222
qsox1	osgep	kcnj1a.1
zgc:163143	polr2eb	si:ch1073-155h21.1
tyw1	syap1	neurl1aa
nucb2b	tmem35	gdi1
si:dkeyp-2e4.2	znf207b	chrna5
si:ch211-207i20.2	pbk	zgc:175280
trmt5	slc27a4	col10a1a
ccnjl	atp5j	chodl
ttc27	b2ml
aggf1	creb1a
stx3a	cd2bp2
trim32	znf1156
rad51c	ptprfb
zgc:114123	mrpl4
larp6a	cstf1
irf2bp2a	zgc:92481
pex5	lancl1
zgc:113426	selenot2
zgc:100829	ubc
ube2s	araf
si:dkeyp-34c12.1	si:dkey-253d23.3
nutf2l	efhd1
clta	ndufa2
crip2	tvp23b
laptm4b	slc39a1
vps35	nr6a1a
pigs	zgc:56525
cmss1	ppm1lb
tmem9b	cox4i1
zgc:158564	alyref
taf9	si:dkey-69o16.5
pus3	sdc4
trim23	sarnp
pde6d	vdac2
ehd1b	zgc:113443
zgc:101679	isy1
them4	zgc:174935
gtf2a2	brd9
rad17	dlgap5
fam114a1	dync1h1
stambpa	npm3
mapkapk2a	prpf6
tlk2	clasrp
rab3aa	bsdc1
mbd1b	brd8
pomgnt1	chmp1a
rxfp2a	acvr1l
nudc	cbx2
pttg1ipb	eif4ebp1
iba57	kat5a
poc1b	ddx42
zgc:162944	zgc:112185
vars2	xkrx
txlna	prdm4
dnajc9	cited4b
ndufs2	mrps7
tpst1l	si:zfos-1192g2.3
hrasb	rbbp4
samm50l	tra2b
arrdc1a	ctc1
arf6a	rad23aa
zgc:112056	h2afy2
rcc1	mtif3
slc39a9	rpl22l1
mxd3	hnrnpr
dicer1	pacsin1b
rai14	chmp2a
acad9	zgc:153631
mettl6	polr2c
wu:fa19b12	homer2
kxd1	vamp8
phgdh	psma6b
jade1	tert
nup43	trnau1apa
mfsd12a	arpc5la
sys1	ildr1a
nploc4	ubald1a
prpf18	chmp4bb
shq1	fbxl3b
si:dkey-119f1.1	acadsb
zgc:92594	zgc:86738
mat2aa	si:dkeyp-94h10.5
mvk	nsrp1
mtfr1	tor3a
ehhadh	cited4a
arl5a	ogg1
tnrc5	vdac3
ube2t	tomm40
si:ch211-147a11.3	arglu1b
nucb1	smarcb1b
nf2a	zc3h18
tmem214	meaf6
st14a	atg4c
nfkb2	ptger4b
wdr6	ipcef1
stoml2	blzf1
exoc3l4	abi1a
hspa4a	ik
mbip	zgc:162193
nphp1	fam177a1
wrnip1	ppil3
rrm1	arl16
atrn	psmd11b
creb3l3l	fundc1
cluha	sf3a3
slc46a1	zgc:56493
dcaf11	si:ch73-111k22.2
dlx6a	smc3
znf395b	smx5
uxs1	gb:bc139872
tmem184ba	gpat4
zgc:101663	sptssa
gna11b	higd1a
aldocb	acaca
tpcn2	dnaja2l
otud3	kat6a
pot1	sept4b
dync1li1	pllp
dock11	utp15
bcl2l13	fbxo28
zcchc17	il1b
ptenb	noa1
tmem266	si:ch211-114n24.6
mical2b	hmox2a
nudt8	mapre2
kif23	mea1
mfsd4aa	usf2
si:ch211-235e9.8	cpm
gpx8	zgc:113209
rtel1	ctdsp2
mrpl3	ilkap
npm2a	tmem50a
sel1l	tmem169a
zgc:113372	mbtps1
ttc33	mylk2
atp6v1aa	csgalnact2
tp53i11a	sept15
zmat5	traf4a
ubl7a	fundc2
slc25a39	ddx27
cpt2	mns1
ndufv1	zgc:110540
med13a	nip7
ddx20	smco4
mmaa	snrnp40
man1a2	psmd1
cldn12	vangl2
rca2.1	grhl2a
acvr2aa	melk
zgc:113279	zgc:92873
zufsp	paqr8
tmem120b	ube2v1
si:ch211-212o1.2	sf3b3
jak2b	fuca1.2
slc24a4a	mgst2
kdm4c	cox6a1
ehmt1a	snu13a
stk17b	si:ch73-266f23.3
hsd17b12b	zgc:55558
cnot10	tcf7l1b
ica1	rangap1b
cd151l	dnal1
zgc:171779	nupl2
acsl4b	nudt12
adnpa	gnptab
ppp3ccb	rybpb
casp8ap2	zgc:114046
sept4a	slc35d1b
elp2	sf3a1
tob1b	irf2bp2b
tbc1d25	psmb2
vat1	rc3h1a
tor1	rnd3a
zgc:171474	naca
wdtc1	ppp2cb
nrg2a	trpa1a
slc26a5	tia1
pm20d1.1	ndufs5
ikbkg	btr02
mfsd4b	ccdc85b
si:dkey-93h22.8	cast
gkup	cptp
phkg2	fam84a
ldlrap1a	rrp12
fbxo30a	psmd8
cln8	srp14
slc5a6b	strip1
si:ch211-241j12.3	zgc:175107
fam122b	eif3ea
rcbtb1	osgn1
asb3	oscp1a
trpm7	actr2a
shdb	psmb1
icmt	pou2f1b
zgc:101562	acbd6
emc8	hacd2
zbtb20	numa1
ano5b	eftud2
si:dkey-20d21.12	rsph10b
mark3b	mapk8ip3
tsr3	ctsa
si:ch211-215a10.4	dicp1.9
atp6v0d1	stx6
fbxo8	si:ch73-299h12.6
si:ch211-89p3.3	zgc:110339
pafah1b1b	tsta3
arl6ip4	tle2
tmem135	myl9b
si:dkey-110k5.6	cirbpb
ywhaqa	dr1
ppa1b	cnot6a
st3gal8	mrpl52
mrpl9	si:dkey-251i10.1
otud5b	zgc:112052
lin9	rimkla
nsmce1	morc2
ska1	znf503
ormdl3	tmem165
nmd3	pin1
zgc:165514	ciapin1
arhgef7b	klf6a
oard1	chst10
fam84b	h1fx
adnpb	eef2kmt
itpr3	klf2a
eif4enif1	msna
tmem198b	brd2a
exosc10	rbb4l
txndc5	cnot9
hps4	gpx1a
gnptg	dyrk2
mettl26	arl5c
depdc1a	dph6
use1	si:dkey-48p11.3
mpzl3	ubl7b
rab3db	wars
ska3	axin2
rnf11b	smndc1
acot9.1	lrrc8aa
ecsit	tjp3
serp1	mob4
lmx1a	cwc25
kifap3b	tmem201
zfp36l2	klhl24b
plekhm2	chaf1a
rnf141	zgc:92664
prmt7	nup133
lman2lb	fam46ba
zgc:91976	cox6c
gfod2	nfil3
fbxo44	mrpl54
pdss1	xpo7
id2a	tmem129
pacsin3	n6amt1
serpine1	hnrpdl
snx7	chrac1
unga	wdr74
dcun1d4	zgc:194224
lonp2	stau2
stk36	cyb5b
fam213b	rnf170
gtf2e1	psma5
thraa	smim7
fanci	cstf2
scamp2l	clptm1
slc39a6	carm1
ppfibp1b	mcm2
phactr4b	ube3d
tfr1b	mob2a
gabpb2b	med23
zgc:162509	ftsj3
ints3	zgc:163030
memo1	zgc:175284
drg1	tmem45b
tram2	nkd1
wrap73	nt5c3a
vipas39	gmfb
znf598	lsm6
gripap1	sycp3
cdkn2aip	znf410
mtmr1b	znf973
rpp30	cdc23
ubfd1	alkbh6
cpsf4	pip4k2ca
fnta	ift46
itsn2b	lgals3b
afg3l2	cst14a.2
gga1	ntpcr
sema3e	cldn11b
chd8	ldlrad3
fam172a	ahcy
aclya	tsr2
eprs	edc3
tor2a	tmem110l
gucd1	eaf2
fkbp8	rex1bd
gm2a	tmem179
tnika	zgc:174877
nbn	ruvbl2
mrm1	ccnt1
cnot3b	pfdn6
uqcrc2b	kdelr2b
cnot7	si:ch211-284b7.3
nsd2	add1
tmem57b	cdk1
iqce	hdgfl2
aifm4	ssr3
cops5	rtcb
wdr26b	wdr46
vps11	khsrp
si:ch211-195d17.2	sap30l
usp3	ppp1cb
surf4l	pqbp1
sdhdb	mpc1
lin37	tex10
tmem115	phlda1
srfbp1	noc2l
zfyve26	prpf40a
uchl3	kctd6b
vkorc1l1	tmem254
peli2	nkain1
smn1	zgc:158619
dlg1	ext2
hddc2	arpc4
baiap2l1a	cand1
slc10a7	psmb3
dalrd3	si:dkey-183n20.15
zgc:77838	utp23
trmt44	ube2w
sash1a	eml1
casp2	rbms2b
tdrd3	zgc:174650
tab3	tmem56b
xrcc4	chd2
ranbp10	dync1i2a
tmem51b	tmem167a
mcl1b	fam76b
phf23b	bco2l
chchd6a	eny2
stn1	c19h1orf109
pygl	ifrd1
mcph1	rnaseka
actr5	zgc:173585
oxsr1b	serpinb1l2
kdm6al	trappc3
ccz1	cyfip1
fdxacb1	rprd1b
atxn7l2a	ube2g1b
fignl1	nelfe
tjp2b	tomm5
vstm2l	sec23a
sh3d21	pigbos1
rragca	rnf20
washc5	myef2
utp4	fgfr1b
ash2l	gtf2b
ap5m1	cdkn2aipnl
zgc:110063	si:rp71-1g18.13
acbd5a	cul3a
tmem106a	b3galnt2
stra6	eed
pid1	gart
si:ch211-198m1.1	prmt1
grpel1	adam10a
mapk7	eif4e1c
snx15	gnb1a
zcchc10	zgc:101858
serac1	stau1
cdc42ep2	atp5g3b
ubn2b	erf
anapc4	waslb
diablob	socs1a
ndc80	lyrm2
tmem33	kaznb
mlycd	ppil1
zgc:171731	phf5a
kpna2	ndufaf1
mettl5	exosc5
si:dkey-206d17.5	ndufb2
spns1	dcun1d2b
lclat1	trib3
rnf145b	adam10b
arhgef18a	dazap2
thap4	rac1a
gldc	ebna1bp2
gsk3aa	tcf3a
pgm3	psmd13
ppifa	cnstb
chaf1b	ndufb7
tmx1	apoob
zgc:193801	sox11b
ogfod1	cdh1
synj2bp	pdhx
hmbsa	aamp
pccb	nup50
mppe1	ppp4r3b
fkbp14	wrb
mtap	riok2
uqcc1	ogdha
cds2	ttc21b
si:ch211-57i17.1	sirt2
smfn	rab14
foxp1a	mtpn
ece1	tax1bp1b
si:dkey-206d17.12	kcnip3b
gopc	dnm2a
capn7	thoc1
fam162a	prg4a
rbm46	psmc3
brap	cyp1d1
tmprss4a	arl3
akap17a	foxk2
stk25b	rab7
ufc1	nat10
ap2m1b	dcun1d5
anapc11	kpnb3
zgc:162183	bckdk
nptna	phb
impdh2	surf1
ano1	yipf3
ppp4r2b	svbp
cwf19l2	ppp2r1bb
syt13	carhsp1
josd2	dcdc2b
rab23	polr2l
dpf2	zgc:173587
sgpl1	cdk4
uqcrfs1	hmg20a
snx17	lin54
rgp1	exosc4
b3gat3	pigf
dtx2	si:ch211-239e6.4
abca5	ddx39b
gcat	erich2
pdxka	dbnlb
neu3.2	bag6
tbc1d5	zc3h11a
mrpl18	cmc1
trappc6b	sf3b5
slc35b2	trabd
mis12	srm
crlf3	trnt1
snx5	bri3
gpat2	ccnt2b
faub	si:rp71-1d10.5
nxph1	znf1024
znf395a	ankfy1
gra	taf2
sgf29	glt8d1
gclc	exosc1
chchd4a	nup98
fam193a	nkiras2
slc35f6	ube2ia
znrf3	pgd
rps6ka3a	rbbp5
si:dkey-97o5.1	wdr35
dcaf17	dync2li1
mtss1	znf384l
znf292b	pfdn1
eaf1	epn1
derl2	pofut2
bpnt1	psma2
etaa1	kansl3
kif1b	si:dkey-44g23.5
pank1a	idh1
tyms	chgb
zgc:114200	psmd3
uba5	mrpl37
slc26a11	tcp1
riok3	zgc:86599
armc8	glulb
slc25a44b	epc1b
papss2a	cul1a
lysmd2	si:ch211-51h9.7
smurf1	mgat5
arfip1	ola1
atp6v1c1b	casc3
cmtr1	trim35-7
ccdc120	lamtor4
suv39h1b	marveld2b
mrps9	klf5l
zfyve28	snapc5
stil	cnih1
spryd7b	cirbpb
znf277	usb1
chordc1a	eri2
rangrf	eif3jb
rad51b	sept10
zgc:152938	tfb2m
mcu	fbxo18
minpp1b	ube2b
brca2	cox14
zgc:92140	psat1
zgc:152652	tprb
mindy1	zgc:112977
ldha	tfeb
zgc:152951	zranb2
mpv17l2	srprb
nup62l	tmem218
zgc:171422	si:dkey-19b23.11
hid1b	si:ch211-283h6.4
snap23.1	rxrba
arpc5lb	smdt1b
rnf146	foxp2
wdr48a	mrpl58
chchd1	dpcd
yif1b	pfdn5
zcchc8	ube2h
mitd1	tmem18
fastk	wdr32
zgc:114104	csnk1da
ccdc149b	psen1
hectd3	mesd
ap1s2	eef1da
pkn1b	tomm40l
atp13a2	nfe2l3
LOC554962	LOC795545
aph1b	gmds
mpzl2b	fbp1a
mtmr7b	zgc:56095
cog8	slc30a7
pcgf6	rab11ba
rufy3	ift122
pfkfb1	bcor
mkrn2	gxylt2
pex3	thap3
eif6	cdc42l
dap	zeb2a
spryd3	wu:fc20e06
gapdh	arl3l1
unc50	ppp1cbl
znf710a	rilpl2
vps45	zgc:158366
rbpja	farsa
tmem209	bnip3lb
pde12	zgc:173652
dnajc24	med15
cldn7b	tefa
dusp22a	sept7b
mapre1a	mia
hat1	si:dkey-109l4.3
mgme1	ptpn12
cdc42bpb	pus7
c1galt1a	rpl29
mrgbp	srp68
zgc:174310	ssu72
c1d	tmem39a
vps18	prkag1
zhx2a	pias4a
galnt11	wdr43
me1	nvl
spire1a	LOC561143
pola1	mrps25
suv39h1a	rgmb
si:ch211-134m17.9	cdca4
cnot6b	fzd6
rnft1	mettl1
smc5	coa6
zgc:193711	col2a1b
ube2g2	zbed4
ppm1ab	gnaia
plaa	mrpl2
mrps31	slc39a7
pars2	rbbp9
ero1b	creb1b
xpr1b	tmx4
nek4	ncapd2
sec23ip	ctnnb2
fancc	bend3
atp6v0a1a	ift22
zgc:171750	abcg2c
smarcal1	smc4
mkl1b	calm1a
calr	kiz
npc2	ppp1r8a
wbp1la	setd1ba
c10h21orf59	zgc:92606
rab22a	hspa4b
fam113	tomm22
chchd4b	proza
ttc5	pspc1
sirt3	usp39
abcb8	ddi2
rock2a	phf10
pole4	gmpr
LOC567622	ube4b
n4bp1	akirin2
pomgnt2	med11
wdr83	pi4k2a
znf687a	dmd
tob1a	pcid2
pfkfb2a	atp1a1a.1
eif1axa	tuba7l
tonsl	ncapg
tapt1b	sec63
tyw3	ywhae2
tmbim4	selenot1b
zgc:111976	stk11
rpia	cyb5a
tmem147	mbd1a
zbtb1	kmt5aa
zgc:103499	znf1174
taf5l	matr3l1.1
st6gal2a	wdr83os
dedd1	otud6b
psmd10	lrrc20
znf609a	tmed4
reep5	zgc:65895
pitrm1	rest
ppm1f	ghitm
heca	macrod2
cox11	esrp2
abcf2a	rbm12b
sema6d	ralbb
tarbp2	c1qbp
ctdp1	cpsf1
dazap1	dnajc19
si:ch211-160e1.5	ccnt2a
cox15	pogza
edem2	psmc1b
tnksb	glo1
dag1	psme1
fkbp10b	btr12
slc9a8	gpalpp1
ttll7	cops9
camsap1b	cstf3
terf2ip	thumpd1
si:dkeyp-114g9.1	slc25a43
tefb	sgol1
lrrc1	apeh
zgc:103564	dynlrb1
zdhhc24	znf576.2
dnajb1a	trpc4apb
entpd6	hsd3b2
pkmyt1	pigx
ftsj1	naa15a
ppfibp2b	zgc:152830
prpf4	qrich1
zgc:113944	tprkb
slc2a15b	ndufa4l
grasp	nfrkb
spsb4a	cenpw
eef1b2	pbdc1
sin3aa	pole
pdlim1	gsk3ab
hmgb3b	znf609b
ccdc126	ptdss1a
timmdc1	abi2a
si:dkeyp-118h3.6	dnajc4
slmapa	eif4g2a
gpia	ddx19
nxpe3	rer1
trpc4apa	zbtb7b
oxr1b	taf10
galk1	taf3
ficd	satb1a
si:ch211-119e14.2	ppardb
pip5k1bb	hebp2
sulf2a	gpcpd1
rnf111	tial1
chtf18	crb3b
mogs	wdr89
hadhb	ccdc25
mrpl46	eda
si:ch211-14a17.6	arpc1a
sirt6	fam83d
si:ch73-14h10.2	rhoca
ddx49	ddx55
jade3	babam1
cmtr2	nudt21
fbxw11a	aars
agps	terfa
taf1b	nt5dc2
prmt5	ndufa10
cwc27	si:ch211-191d15.2
galnt2	nup85
ttk	scp2b
usp12a	sypl2b
aar2	srp54
si:rp71-56i13.6	rps6kb1b
mapk14a	ostc
gabarapl2	fuca2
cep63	iqcb1
ttyh2l	sft2d3
tspy	crot
gtf3c2	cd9a
cul1b	selenok
tsc1b	jazf1b
dnpep	zgc:101715
cyb5r4	iars
eapp	ankrd10b
pex12	lman2
phb2a	nudt9
rraga	rpn2
eif4ba	echs1
rarab	psma3
pora	ngly1
znf143b	fam98b
tsc22d1	nosip
tle3b	ccdc32
nxn	actr6
tnpo3	idh3g
zgc:153952	ap2s1
zgc:153990	cdk2ap2
pdp1	zbtb8os
piga	terb1
ghdc	zgc:66160
ticam1	ndufb2
si:dkey-261j15.2	morc3a
rabl3	samhd1
kptn	nckap1
ndufa9a	coq5
rnf150a	pfdn2
cnn3b	ip6k2a
zdhhc13	pds5a
lmnb1	rtfdc1
rtkn2b	prkcbp1l
rundc3ab	pak1
mycb	ythdf2
senp7b	brf1b
nup58	atxn3
tmem237b	cox6b2
rint1	coro1ca
clpxa	ccnl1a
timm10	frg1
zgc:173726	pycr1a
phactr1	isoc1
znf644a	smg7
camk2g1	cdc42
si:dkey-46a10.3	ss18
slc38a7	rb1
ca5a	LOC571912
scamp3	grb2b
irf2bp1	ldb1b
si:ch73-314g15.3	zgc:173602
insrb	g3bp2
im:7138535	acaa2
atg4b	ampd1
wdr18	dhfr
ambra1b	acot14
tmed2	sec62
atxn2l	klhl12
lmbrd2b	acot15
sec11a	fn1a
dab2	hsbp1b
cisd2	gpr160
pdcd5	smarca5
ahcyl2	pank2
cln3	utp3
spryd4	add3a
rpusd1	rgs2
npepl1	btbd10a
zgc:92027	plekha8
sh3glb1a	pbx2
ints13	atf6
hccsa.1	hspa14
ephx1	si:dkey-148h10.5
acsl4a	eef1akmt1
ppp3cca	si:dkey-102f14.5
thg1l	slc25a32a
prmt9	rbm14a
slc29a2	si:ch211-63o20.7
srpk1a	emsy
med4	zgc:103755
pgap2	rab5ab
golga7	mob1ba
rad54l	glud1b
tktb	cyb561d2
socs3b	arf4a
kcmf1	slc11a2
galns	brd2a
ap1g1	notch2
ivns1abpb	zgc:158343
fam49bb	ctbp1
tcp11l1	gstt1b
si:ch211-207k7.4	gamt
si:dkey-77f5.3	il10rb
pdlim5b	gpr161
naa38	tex36
ptpn2b	psen2
bpgm	psmb4
xiap	blcap
[truncated: 4,590 more rows]

## Sheet: define by SNP
maternal and zygotic expression genes	only maternally expressed genes	only zygotically expressed genes
nrf1	ccdc80	prdm1a
matr3l1.1	slc35a5	cyp2aa4
pms1	itsn1	nr2f6b
asnsd1	thraa	cox5aa
gtf2e1	pms1	rassf7b
grasp	lcmt2	fgf8a
ptpn4a	skap2	chrna5
daxx	unk	dlb
lcmt2	hsd17b8	wnt11
lcmt2	mycbp2	zgc:109986
crygs2	inppl1b	zgc:100868
znf511	mhc1zea	lmo7a
mapk14a	gpm6bb	fkbp9
znf384l	flot1a	mapk12b
bysl	nup155	cyr61l2
mycbp2	zgc:112148	tbx6l
srrm1	stx3a	myf5
rbm14b	drd4-rs	efnb1
actn3b	dock5	sult5a1
psme3	pygb	si:ch73-141c7.1
tomm34	itfg2	gngt2a
nfyal	invs	sox19a
gulp1a	mcoln1a	dla
noc2l	fam102bb	ctsll
nup155	glud1b	apoa1a
phgdh	rundc3ab	capn9
ppm1ba	mylpfb	zgc:92749
b3gat3	optn	foxa3
txlng	tbcela	zeb1b
brf2	supt3h	pygmb
cwf19l1	trmt2a	anxa6
itfg2	gbx2	gadd45bb
igbp1	vps54	tnfb
invs	gdf9	vox
scocb	pik3cd	chpt1
mcoln1a	zbtb22b	dlx3b
xpot	pde10a	flt4
xpot	psma5	cdkl1
rtcb	pla2g7	mylz3
me3	atp7a	fat1a
frmd6	pfas	gsk3b
tubb4b	lats1	crtap
cyp11a1	plxnb2a	krt18
mief2	chm	foxi1
ercc3	mrpl21	evpla
rdh14b	cdk20	serpinh1b
ruvbl1	traf4a	col1a2
rpa3	uhrf1bp1l	efnb2a
pip5k1aa	galk2	dld
anxa11b	acsl4a	mdkb
rabif	hecw1b	sla2
her11	casp9	tmod4
utp15	exoc4	zfp36l1b
sema6d	rcor3	hnf4a
atp1a1a.1	kmt2a	gnai1
arcn1a	eefsec	fzd3a
cog8	tcf12	mxa
cep57l1	tfe3a	fgf17
aven	ccdc146	pnx
pdap1b	ccdc146	efna1a
ss18	mgrn1b	crabp2b
vps54	asz1	irx3b
cep135	hinfp	smad6b
eef2b	pex19	praf2
scnm1	zp2l2	arl4ab
eif4a1b	gys2	stmn2a
fgfr1op	cat	wnt5b
cd276	immp2l	gna14
oclnb	trip4	spns3
apip	ispd	hs3st1l2
skp1	aspa	stm
psmd1	wrnip1	stm
urb2	tyro3	rgcc
nup88	camk4	si:ch211-173p18.3
zgc:101559	slc5a5	si:ch211-173p18.3
dhps	map3k5	pcdh10b
pik3ip1	mtfmt	arl11
zfand2a	btbd3a	aplnrb
ppp1caa	rint1	krt17
nup93	zbtb20	ghrhra
thrap3b	fbxw5	fgf24
mak16	smim14	enosf1
unc45a	gatad2b	mpz
hsp90b1	dera	hkdc1
pla2g7	tp53i11b	im:7138239
arih1	lta4h	hk1
zfyve19	ust	lhfpl2b
atp7a	igf2r	cyp2k8
pfas	myof	dharma
lats1	det1	zgc:92380
dennd5b	gpx1b	styk1
plxnb2a	shisa4	foxd5
srp54	mre11a	phlda2
usb1	pip5k1bb	cldne
mrpl21	eomesa	cldnf
acsl1b	asic2	morc3b
decr1	enpp4	id4
med13b	far1	dkk1b
st3gal2	lrp5	fzd8a
sf3b3	btd	mapk11
spoplb	plxna3	frs2a
phf6	ncam1b	tnfaip8l2b
marcksa	ect2	ugt5a5
uhrf1bp1l	sft2d1	notch3
acsl4a	slc25a39	zgc:114118
acsbg2	ufl1	pcdh18b
rab23	ttyh3b	tmem35
reep3b	zyg11	arrdc3a
copa	il15l	grk7b
dhfr	klhdc10	dzank1
tmed9	gas6	eve1
atl3	fam129bb	zgc:123295
seh1l	fam114a1	asb11
ldlrap1a	atxn10	si:dkey-33c12.3
snx10a	apex2	slc43a3b
tardbpl	chia.4	ackr3b
ppat	brap	phactr3a
pin4	nbas	nnr
znf800a	eml2	slc13a4
mtmr2	smarca2	plcd1a
ccdc9	cbr4	foxj1a
nabp1a	pigc	tmem98
irf2bp2a	prkcda	scn4bb
syf2	napepld	zgc:153409
mad2l1	dusp8a	ankrd34bb
mpp5b	pvalb6	igf2bp2b
ccdc146	dlg1	lcat
mgrn1b	llgl1	plekhg7
foxp1a	klc1a	si:ch211-151h10.2
hinfp	adssl1	cuedc1a
psen1	rnf114	rnf183
rock2b	engase	fgfr4
pex19	adam9	col17a1a
stip1	dacha	cldna
gstp1	smad3b	cyp2aa1
ncapd2	clasp1a	si:ch211-191i18.2
eif4e3	qars	cart4
limk2	per3	polr2m
oclna	sarm1	ribc2
calub	npffr1l3	sp5a
atp2a2b	xrcc4	kazald2
efr3a	capn12	cyp2aa2
ahcy	zgc:55621	cyp2aa7
wrnip1	scn1a	rpe65b
rpe	abcb4	rpe65c
kdelr2a	pomgnt2
stam2	pgbd5
sucla2	camk2b1
prdm9	ppp1r14aa
map3k5	pou6f1
ckap5	epha4b
slc30a1a	dennd6b
rint1	dhrs12
mphosph8	stag2a
nek2	wars2
fbxw5	mical1
tsr2	foxn1
rpl28	ttc26
slc39a10	kif3b
anapc2	fbxl2
cd9a	cog6
gon4l	pdha1a
gon4l	spint1b
gpatch4	rnpep
mmadhc	prkag2a
zgc:112334	rer1
slc25a20	tmprss4b
cyb5r3	gpia
tbc1d17	uap1l1
ankmy2a	dhcr24
atad5b	zgc:172271
sfswap	colec11
nudcd3	brox
tktb	tbck
lta4h	cers2a
akap1b	spo11
det1	prkacaa
sav1	ercc4
ddx39aa	ildr2
ell2	foxp1b
arhgef7a	vac14
psmd9	lnpep
itgav	ppp2r5d
itga5	aida
exosc9	taf1a
esyt3	aida
polr1e	taf1a
ddi2	aida
brd3a	rfx3
ak4	acsl3b
nadka	grb2a
chrna2a	ehd1b
atp5g3b	igfbp3
drg2	ppp3cca
drg2	grip1
gfer	hid1b
zmynd19	slc50a1
wipf2b	abcd3a
snd1	s100a1
wdr26b	zgc:77112
nkain1	aarsd1
nkain1	hps3
far1	rab22a
lrp5	mtmr9
btd	trim25
cse1l	zgc:153311
hnrpkl	rabgef1l
itm2ba	rapgef1b
asb6	keap1a
cnot3a	xiap
plxna3	nudt3a
recql	zdhhc5a
sash1a	esr2a
slc30a4	acadvl
rae1	fam102ab
pbk	gys1
rest	ilvbl
ryk	sinup
mynn	gpsm2
ect2	bag5
aco2	mapk4
tmpoa	lrrc40
sft2d1	pik3cg
kcnk6	hsd17b10
cct7	micall2b
irf2a	ubp1
strap	rab3da
fbxl18	ano10b
slc25a39	ubr5
fbxo8	rev1
epc2	hpca
ufl1	zdhhc8b
pdxdc1	acot7
bloc1s4	st8sia2
gins1	crygmxl1
dusp1	dclk1a
ube2q1	henmt1
sub1b	kat6a
tsr1	tpm4b
gas6	camsap1a
dazap2	camsap1a
fancl	cdc42bpb
vrk2	trioa
slc35b2	zgc:103759
crnkl1	senp8
jak2a	yif1a
xpnpep3	zar1
gabpb2a	ek1
onecut1	fermt2
pou2f1b	lmx1a
sart3	mical2b
mettl2a	mical2b
eef1da	tmtc4
rbl1	arhgap17a
stxbp3	znf330
dbnla	nfkb1
sars	ap1b1
fam114a1	slc9a8
cnn3a	caprin2
mcl1b	necap1
csnk1da	ccdc149b
spred2b	cyb5r4
atxn10	creb3l3l
fkbp4	nipal3
trmt61a	cept1b
arhgap12a	asmtl
brap	rgs14a
fam20b	ephb2b
mtmr8	vrk2
snx3	orc5
apeh	cntn5
tmed5	klhl24a
dldh	prkcbb
eml2	slc26a5
hmbsa	eno1a
hprt1	stat3
si:ch211-241e1.5	golt1ba
pofut1	bnip4
tnikb	arl4aa
cbr4	wdr13
pigc	scaper
mob1ba	lpp
tom1l2	pfkfb2a
zer1	heatr5a
uevld	pcyox1
zgc:136439	znf395b
ppm1da	parn
clgn	ctnna2
aif1l	cops8
txndc5	dock4b
med19b	ezrb
pdcl	gbgt1l1
arf1	fynb
tial1	lsm14b
papola	fzd5
unc119.1	ormdl3
llgl1	mkln1
dffb	agmo
zc3h11a	gli2a
srek1	kctd2
mcl1a	l3mbtl3
dirc2	tsc1a
hdlbpa	trappc5
agk	slc46a1
dcps	ccdc94
snrpc	arhgap12b
cdc6	ralgps2
med14	cyp2u1
fam199x	iscub
trim13	ehmt1b
lsr	zgc:101583
engase	gtf2h1
nup133	fam126a
ldb1a	robo1
atp5a1	mcu
wdr54	taf8
nqo1	uchl1
bin2b	slc48a1a
ptgs2b	si:ch211-119o8.6
clasp1a	scyl3
xpo4	ift88
stx12	mpzl2b
qars	rmnd1
acer1	oxsr1b
eaf2	usp20
fam46c	pdlim5b
rpl21	bco2l
per3	pold1
mmgt1	bmp1b
ppm1k	galk1
gipc1	cradd
tlk2	fkbp5
scn1a	aamdc
ttc21b	coro7
ppp1r12a	nlk2
mettl13	tubgcp3
cbsb	tph1a
zgc:92907	atp2a2a
wdr3	clybl
uqcrb	dlg1l
acvr2aa	grtp1a
akt2	agfg1a
esrp1	sdcbp
rnpc3	gnptab
traip	uchl3
blzf1	ppp2ca
rps9	dennd2db
lsm14ab	galnt18a
lpcat1	grin2bb
rcc2	sppl2
ugt2a5	syt1a
sfpq	gnai3
pou6f1	znf326
dennd6b	tescb
twf1b	cluha
chuk	dnaja1
aldoaa	gspt1
msh6	gba3
b9d1	snai3
u2af2b	enkur
dhrs12	dhrs11b
stag2a	tmed1a
slc35e1	reep2
insra	zgc:113343
slc35d1a	stat2
slc38a7	clstn1
hs6st2	pparaa
ttc26	adcy8
apoa1a	kdelc1
kif3b	pcbd1
prkar1ab	slc15a2
ccnl1b	ddx1
papolg	ddx1
emc7	rars2
umps	mecr
dpf2	serhl
psme3	thnsl2
taldo1	msi2b
bcs1l	tmem8a
cog6	fam84b
pdha1a	trit1
mgat1a	xgb
fam76b	twsg1a
zgc:77849	scd
aurka	hspbap1
hcfc1b	snx27a
polr3f	msi2a
slkb	per2
polr2b	rab6ba
cdc34b	lmbrd2a
atf6	dachb
gtf2e2	rtel1
rpusd4	camsap1b
atp2b1a	pho
eif1b	nccrp1
tmem57b	mink1
rer1	slc25a25b
nucks1b	atp6v0a2b
nop56	cyp1d1
nop56	cds2
mettl3	ankle2
npepl1	pgam5
itgb5	sirt3
mob1bb	atp6v1c1b
gpia	zfpm2b
ubiad1	sh3bgrl3
ints6	dazl
mta2	glb1
ing2	mgrn1a
mrpl11	gstcd
ndrg3a	pdxkb
gclc	aanat1
hiat1a	sema3e
dhx16	cbr1
zgc:55558	cdadc1
phc2b	cab39l
tars	calcoco1a
eif4eb	ankrd52a
ndufa10	tcf21
ppp6r3	gpd1c
ccbl2	gpd1c
cct4	lingo4a
rrp15	tbc1d16
gga3	kif1b
lpgat1	rad51b
rfx2	aldh2.2
vdac2	slc7a2
tpd52l2b	mtus1a
brox	mtmr7a
cers2a	mat2ab
ccm2	pfkfb1
usp9	tpbgb
srsf6a	ddost
thop1	fam131c
ppp1r13l	tmem192
zgc:77158	bmp15
capns1b	slc35c2
osbpl2b	mcm3l
lmo4a	pm20d1.1
armc1	il1rapl2
pi4k2b	zgc:113278
psmb3	ramp2
ndfip1	nde1
cwc22	xpa
lbr	zgc:113411
zgc:77086	zgc:113293
lhx1a	igsf8
pgam1b	pitrm1
wasla	cpt2
gspt1l	cpt2
axin2	gng7
ercc4	si:ch211-14a17.7
zgc:55413	ldhd
zgc:55413	zgc:101569
zgc:77118	nsfb
vac14	klhl21
atp5j	arhgap4a
stk17b	vps37b
tmbim4	zgc:194209
luc7l3	cep68
ppp2r5d	rgs17
rabgef1	qsox1
atg4a	loxl3b
aida	mcfd2
aida	arpp19b
taf1a	rspo1
rfx3	prom1a
exoc3	fryl
slc38a5b	scfd2
mbtps1	coil
acsl3b	epb41l4a
esco2	zgc:101562
rps4x	fstl5
acox1	crata
ranbp1	tlr18
abi2b	ephx2
kif23	crfb2
znf598	crot
ppp3cca	rab27a
acvr1l	tmem97
tspan18b	nab1b
ube2d4	adprh
rpl27	rbbp9
mknk2b	ldha
mfsd8	hspa13
rbb4l	got2a
ube2g1a	ddb2
zc4h2	aagab
psmc5	hdac4
pgd	ttk
lsg1	zgc:91860
st3gal3a	mkrn1
arhgap11a	tbc1d32
rhoac	tsn
racgap1	glb1l
gpc4	si:dkey-4e7.3
klf3	zp3a.2
prps1a	myo6b
psen2	ttc38
znf207b	sema3ab
xrcc5	hipk2
tubg1	tpd52l1
psmd10	rnf144ab
rap2c	pak1
tnip1	acad8
nmd3	slc25a27
tmem50a	heca
smcr8b	lifra
vps26b	mapre1a
lemd3	hook1
dnajb1a	slc8a1b
rnps1	atp2b3a
slc25a40	scrn2
rpl5b	zgc:65997
stat6	tmem205
pwp1	rab3db
zdhhc16b	bpnt1
hcfc1a	mob3c
nup107	cwc27
dbnlb	klf7b
fibpa	cyp2x7
smurf1	zbtb2a
keap1a	loxl2b
mkks	lrrc8db
xiap	sumf1
dag1	nop16
eif4enif1	rps6ka4
trim33	nr4a2b
psmd13	atg9a
fxr2	gnaia
zdhhc5a	zgc:66483
upf1	ccpg1
tfdp1b	pygo1
med7	vcla
cap1	fkbp10b
fmo5	klhl11
dhtkd1	vdac1
fignl1	lcmt1
ythdf1	csnk1e
anxa5b	minpp1b
cdk8	slc51a
setd3	stk38l
ctdnep1a	dcp1b
mcat	rassf8b
tprb	pawr
rnf20	kin
acadvl	hgfa
sdha	lrmp
psat1	cax1
slc35f6	usp3
ipo9	pdzrn4
tbca	stab2
aqr	asb13a.2
mtmr6	gas2l3
ints3	cap2
ccdc40	brd2b
farsb	aass
fam102ab	galns
dpm2	stra6
wdr5	pde5ab
tmem214	cdk7
pmpcb	dok1b
scamp2l	zgc:66449
ikbkg	cd99
zgc:152670	trim35-1
adsl	atg4b
bud31	ehf
asb12a	rag2
emc8	slc4a2b
vps37a	sgcb
brd9	elmod2
npc1	zgc:66455
elp2	pkz
tmed1b	mgat2
gnai2b	ppp1r12c
gpsm2	sgms2
glulb	snn
mettl8	micall2a
apmap	bdh2
patl1	fbxo43
eif4ba	azin1a
mylz3	smcr8a
lancl1	htt
eif3i	atxn2
ctdp1	zgc:113162
hnrnpabb	me1
mccc2	itgb1b.1
ccdc6b	slc2a15b
sys1	lrrc6
alg6	tdrkh
mapk4	zgc:113054
lrrc40	fancd2
phb2b	stk10
klhdc4	pcmtd2
aclya	hdhd3
g3bp1	tgfa
smc2	cdc42ep2
srrt	pycr1a
stard3	pgk1
micall2b	crbn
cand1	ap1g2
syvn1	mfsd6b
casp3a	cnot6l
pdss1	coro1a
her7	uggt1
sfxn2	gpsm1b
ubp1	pomt2
sf3b2	sypl2a
neil1	appb
pak4	rnasen
ano10b	ghdc
ctnnal1	pipox
depdc1a	si:dkey-216e24.3
ubr5	mettl16
wdr33	nmnat1
rev1	lzic
etv4	lzic
ets2	klc3
ets2	tprg1
dyrk1aa	rangap1b
ets2	fastkd1
dscr3	szrd1
taf5	bcar1
cyp2v1	rap1gap
znf503	wbp2
smn1	rpia
kdm7ab	hdac9b
sf3b4	tmem47
retsat	immt
rad54l	galm
arl5a	epas1b
gtpbp3	ical1
saal1	tnfsf10l4
cdh2	aifm1
pknox1.1	trim55b
jak2b	exoc3l4
snrpa	nop58
zfand5a	ccdc106b
kat6a	fzd3b
hnrnpk	cept1a
zcchc17	tfr1a
nrarpb	zgc:113227
gatsl2	abcc4
hspa4b	jam2a
smc3	arfip2a
erp44	zpcx
mob3a	bdh1
ing1	mepce
haus5	sowahcb
sh3bp5la	ubfd1
rpsa	man2a1
ube2l3a	dgke
arglu1a	coq4
gsr	mtmr12
cul1a	alkbh2
tfdp1a	vps16
znf687b	bbs7
fbxo30b	ptk6b
adprhl2	dapk1
uxt	trappc12
sec23b	sybu
cdc42bpb	lrrn1
trioa	zgc:162160
tmx1	samd7
esd	slc12a9
parp1	ash2l
taf7	fibcd1
senp8	dgkaa
jade3	clstn2
yif1a	lrsam1
ldhba	nphs1
sept7b	slc20a2
pbx2	znf592
celsr2	trim62
rfng	pla2g6
hsd3b2	adnp2a
zhx3	cyb5d2
rps6	c2cd2l
qrich1	zbtb44
nfe2l3	dhx34
fn1a	st14a
ugdh	hexdc
cnot3b	timp2a
dscc1	lss
sec62	ugt5c3
sfxn1	smap2
idi1	n4bp2
vcp	nsmfb
bmp2k	tgfbrap1
fam151b	ensab
map1lc3b	arvcfb
brdt	nxpe3
ek1	itpr3
psmc2	wscd2
usp2a	trpv4
zgc:73340	lap3
cpsf4	gse1
usf2	cpox
eif6	hipk3b
si:dkeyp-120h9.1	pm20d1.2
efcab7	ranbp10
os9	atrn
cnih1	pcm1
nup153	armc8
slc2a8	si:ch211-233a24.2
clasp2	leng9
adi1	ttl
yipf3	gpd2
ewsr1b	hipk3a
nono	march8
znf330	atp9b
rem1	piwil2
emc3	cep290
ap1b1	socs5b
baxa	zgc:158403
jak1	pi4kab
gtdc1	prkar1b
sesn1	pnpla7a
caprin2	lipea
srp68	ago3b
armc1l	psmd14
cyb5r4	mtif2
ddx56	ttc13
gmcl1	oxr1b
hgs	micu1
ubald1b	pter
dhrs13a.2	cenpe
ctu1	iba57
ift57	galnt11
herpud2	ppm1h
rhbdd1	fancb
zc3h7a	srebf1
clptm1l	fam167aa
nelfcd	zglp1
poc1b	exd1
c1d	klf9
cfl1	plcb3
nipal3	pros1
hmgcl	grhpra
apaf1	si:ch211-132b12.7
wsb1	mrps2
cab39l1	zgc:152951
kdelc2	fam174b
asmtl	dclre1b
ncoa4	tspan13a
tab2	zgc:153372
ubl3b	pex11b
gdap2	ttc32
sec61a1	pdia5
klhl24a	vps53
ccdc25	fgf11a
hmmr	capn5a
cherp	sfxn4
katna1	actr2b
ntpcr	nit1
b4galt7	tnfrsf1b
ginm1	rab11fip4b
ercc2	cbx8b
erlin1	mtmr7b
prdm10	vapb
ppan	stmn2b
atp6v1g1	tatdn2
ufc1	vdrb
ntmt1	eaf1
slc26a5	pmvk
ppp1r8b	snrka
nudt15	bcl6a
dnpep	ptpn23b
fbxo44	furinb
otud3	mlpha
psmf1	si:dkey-147f3.4
add1	hps5
gid8a	zgc:112023
rplp2	fopnl
tbcc	trim35-39
arl4aa	ndc80
ecd	zgc:158852
fxr1	slc25a37
tmpob	scly
clic4	dnase2
dtl	si:dkey-91i10.2
snrnp40	zgc:194981
mob2a	limch1a
atad1a	tuba4l
fabp3	hhat
zgc:66427	vps39
tjp2b	spag9a
gmppab	unc5a
ankrd49	nptx1l
nrbf2b	kcnd1
ggps1	arv1
idh3g	setmar
timm8a	dcaf17
gnsa	mettl8
ccdc174	dab2ipb
stk24b	si:dkey-20i10.7
abhd14b	tbc1d25
casd1	lars2
llgl2	zbtb24
atp6v1c1a	tnk2b
pcyox1	mri1
vamp8	herc3
znf395b	cox15
wasf2	abhd10a
adh8b	haao
zbed4	aldh5a1
twistnb	trim32
nolc1	pex1
oser1	elmo1
pane1	zfand4
lysmd3	pi4kaa
parn	cyth1a
rilpl2	ap5s1
tmem134	apom
cops8	aldh1l1
tmed4	arid5a
trip13	slc37a4b
grnb	ntrk3a
edem1	zgc:174863
cd63	erg
lipt1	nlgn4b
pdcd6ip	cx44.2
tcerg1a	olfm2a
prdx2	znf296
idh1	tor1
ftr83	kiss2
aatf	lmf2a
serp1	ap5z1
mtx1a	pacs2
wdr24	tex2
sgk1	rbm24a
slc25a3b	dcaf6
nvl	spc25
nvl	znf692
gli2a	acaca
chp2	mon1a
chek2	vwa8
ddx51	vhll
rpap3	prdm13
tecrb	atp10d
blmh	zgc:195245
marveld3	mms19
mospd2	tmx2a
trappc5	usp13
slc48a1b	rbm46
slc46a1	ccdc85cb
ube3d	zgc:194930
prpf8	cep112
ccdc94	pot1
fanci	doc2d
dbi	msh3
arhgap12b	stambpb
axin1	grip2a
ppp4r2a	coro7
ehmt1b	ppm1lb
tspo	si:ch73-41e3.7
slc25a14	tomm20a
fam126a	adcy5
bcl2l10	si:ch211-214j8.12
nol11	si:ch211-271e10.2
robo1	gbgt1l2
taf8	zp3c
tmem106ba	notch2
rhoaa	si:dkey-58f10.7
gpatch11	pth1a
rexo1	rbp2b
scyl3	rbp2b
ano1	si:dkey-167i21.2
zfr	mrpl44
aptx	irf6
tpd52l2a	si:dkey-4c15.14
fbxo28
ift88
tcp11l2
mpzl2b
uros
fzd7b
cpsf3
si:ch211-13c6.2
nus1
zfyve21
rad18
ap1s3b
tp53inp1
galk1
sumo3a
tead1a
ube2v2
commd8
utp23
ube2d2l
mkrn4
synj2bp
gmfb
cnih1
hmga1a
tesca
rhogc
aamdc
rsg1
edem2
morc2
si:ch211-114c12.2
fbxw11a
mospd1
lsm12a
maff
pcca
rab32a
nupl2
chchd1
tubgcp3
med23
ppfibp2b
exosc3
e2f4
ilf3b
h2afx
mtx2
neurl1b
impdh1b
kansl3
wdr32
commd5
dedd
fam213b
casc3
agfg1a
agfg1a
mrpl44
camsap1a
eef1db
gnptab
hyi
uchl3
sap30l
tmem30aa
gtf3aa
idh3a
cct7
zc3h10
metrn
sppl2
hmgb1b
zgc:77880
nudt1
atp6v1e1b
ing4
dnmt1
hadh
ddx18
fam120b
cmtr1
siah1
phf23a
psmg3
cited2
cluha
pde12
dnaja1
tmem127
ptrh1
gpatch2
timm50
hmg20a
rbm17
reep2
dctn2
calm3b
zgc:56493
glrx3
zgc:113343
prrc2a
tada2a
ftr67
clstn1
abcf1
tcp11l1
lef1
ptbp1b
stard10
cpped1
kdelc1
mapk6
mapk6
slain2
ddx1
phactr4b
epb41l5
mecr
tiprl
zgc:85975
arpp19a
sept8a
ppp1r10
arl4cb
rps27a
farsa
ndrg1a
trit1
dtx2
mrpl27
pcnt
ndufaf7
supt4h1
psme2
mcm6l
primpol
metap1
mdm2
nkap
ube2j1
paics
ppat
api5
pi4k2a
rbm48
ncaph2
hspbap1
spty2d1
trmt44
mrps23
cyp26a1
csnk1g2b
elac2
rarga
cpsf1
capza1a
ppp5c
ing3
jmjd6
mars
mpped2
per2
atp6v1aa
insb
nsmce1
scel
mysm1
tspan3a
rcn2
ncapd3
dachb
tnrc5
asah1b
copg2
uspl1
rps10
myclb
bzw1b
pfdn5
rtel1
camsap1b
zgc:101858
pho
riok2
ncor1
srsf7a
capns1a
taf1
terf2ip
fcho2
slc25a25b
nelfb
sfrp1a
rps6ka3a
gps2
atp6v0a2b
cyp1d1
tchp
ankle2
pgam5
zgc:113208
xbp1
zgc:91910
zgc:113424
rps3a
marcksl1b
slc25a11
n6amt1
si:ch211-173p18.3
zmym4
cdkn2aip
zbtb8b
mfsd2ab
yars
tdp2b
sh3bgrl3
ppp1r11
eya3
krit1
nudcd1
hnrnpa0l
rpl14
trpm7
lamc1
phf23b
slc39a7
pop7
glb1
slc3a2a
ndufv1
hexim1
scp2b
agpat3
setd4
kdm2ba
rcbtb1
cab39l
ccnt2a
bcl9
znf865
psmd4a
tomm40l
hmgn3
hbs1l
commd7
si:ch211-226m16.2
ankrd52a
rnf41
plagx
slc34a2b
slc2a12
tbpl1
irak1bp1
scamp1
gpd1c
hnrnpr
gpd1c
gpd1c
rnf139
ube4b
kif1b
psmc6
cgrrf1
tmem242
pfdn6
mat2ab
atp6ap1b
rpa2
denr
smad5
gpr137
dpf2l
ddost
wdr92
rpl9
polr3e
qdprb1
slc43a1a
ssrp1a
zgc:112083
prps1b
slc35c2
st3gal5
uba1
rps6kal
leng1
gne
aurkb
fnta
npm1b
exosc10
zgc:112980
actb1
uncx4.1
zgc:101663
tmem184a
actb2
wipi2
foxk1
lfng
psmc3ip
ramp2
ppl
nde1
gna13b
flot1b
crls1
med25
grb2b
kpna2
ddx5
ergic3
rprd1b
rprd1b
zgc:113411
tcf7l1a
tnpo2
e4f1
rnf34a
tsc22d1
dnajc15
igsf8
ube2d3
pik3r1
gga1
pitrm1
tsr3
fzd8b
cox6c
eif4e2
sdhc
cpt2
spryd4
cpt2
gbp1
nfkb2
gpr160
copb2
mrpl12
gins3
setd7
slu7
zgc:101569
smc4
cul3a
nsfb
tsnax
slx4ip
map4k5
rhebl1
nasp
prpf38a
orc1
tmem209
ahcyl2
zgc:113019
msl2b
bag3
pitpnaa
mrps6
ptk2bb
mtif3
itm2cb
hes6
mrpl38
dsc2l
samm50l
mcfd2
dync2li1
mea1
znf800b
lamtor2
arpp19b
ap3s2
c1qbp
slc25a33
sirt6
ppt1
snrnp48
ptp4a3
fryl
mcm4
snai2
coil
scpep1
psma2
thumpd1
hint1
nek4
cdc42l
prim1
zgc:101562
slc35a1
syncrip
krcp
kpnb3
ctsk
ephx2
crfb2
ephb4a
crot
bcl7bb
rsl24d1
fam214a
wdfy2
unc50
ssr1
epcam
spsb4b
exosc5
hnrnpul1
rtfdc1
sestd1
psmg1
prickle1a
nifk
ccdc93
plekha8
rbbp9
macc1
zgc:114130
wdr75
elavl2
lactb
dcun1d2a
ldha
si:dkey-286j15.1
add3a
fdps
ildr1b
usp37
piga
mier1a
thap3
tufm
dhrs13a.3
ddb2
morf4l1
hif1al
aagab
setdb1a
gemin4
mrps25
stx8
mrpl15
zgc:161969
ttk
chmp7
dnajb1b
rmdn3
yrdc
uba52
smg5
mrpl39
mrpl39
trmt10c
dcun1d2b
mkrn1
usf1
rrbp1b
zgc:55461
hsdl1
cct2
rnf141
tsn
chmp5b
usp39
gpx1a
elp3
kpna5
mrps7
pacsin1b
smek1
trmt6
rab40b
tlk1a
sos1
mrps24
nup205
ywhaqa
mboat2b
pex7
rnf144ab
lpar2b
rnaseh1
acbd3
pak1
tert
wtap
scarb1
cx30.3
supt5h
rpl7l1
foxo3b
rpl10a
mapre1a
mibp2
bloc1s6
cyp2p6
cyp2p10
azi2
si:dkeyp-117h8.4
chst14
ints10
fbxl5
cux1b
nsun5
nsun5
ripk4
rmnd5b
dph3
nck2b
efhd1
cab39
ndufb11
rbbp8
ccdc124
vamp4
si:dkey-86e18.1
tmem56b
tmem205
rab3db
cmc2
abt1
cdc45
amd1
mmachc
lrpprc
znf292b
tube1
cnot1
setd6
cyp2x7
xkrx
ahi1
fuca2
peli1b
iars2
rab3gap2
acss1
gxylt2
sumf1
cdc37l1
sumo1
atf1
atg4c
rbmx2
nop16
pars2
ttc4
disp1
qkia
eif2a
cdc23
sall4
pak1ip1
kif20a
etv5b
cycsb
ola1
rtn4a
gnaia
pou5f3
dck
fpgs
cdk9
notch1a
zgc:113348
si:rp71-1h20.5
cbx2
bcap31
tmem106a
bmpr1ab
klhl11
vdac1
lcmt1
tomm22
tmem184ba
csnk1e
slc16a8
pdap1a
phf5a
pofut2
gsnb
sh3glb1a
phb2a
tuba1b
rps16
tmcc3
nr2c1
ppp6r2a
gcc1
atp6v1f
hgfa
bik
hsd17b2
sco2
dram1
pus1
noc4l
phpt1
nfybb
hic1l
ciapin1
stab2
mettl25
ccdc59
mfge8b
mcm10
lyrm5b
zgc:113263
cebpz
nudt4b
agbl5
si:ch211-51e12.7
psma4
slc47a1
zgc:110339
nup85
brd2b
rab10
rps3
b3galnt2
brd1b
fnbp4
ctu2
gart
tes
ist1
dhodh
prmt7
cdk7
ythdc1
isca1
ndufs8a
suz12b
pomgnt1
blcap
atg4b
atg4b
dtymk
accs
boka
uap1
fdx1l
btr02
alkbh4
osgn1
uqcrc1
ociad1
tbl3
smarca5
elmod2
higd2a
faf2
psmd12
ccdc22
pkz
mgat2
ankrd12
ppp1r12c
pdcd11
mul1b
tia1
metrnl
arl13a
dpp9
bsdc1
spryd7a
bdh2
cisd2
suclg1
gpatch3
azin1a
alad
shmt1
golph3
khdrbs1a
atxn2
bcl7a
zgc:113162
eif2s2
gosr2
hsf2
prpf38b
cep44
lrrc47
alg3
chic1
pdzd11
gnl2
itgb1b
rpl31
ddx46
ddx46
h2afy
ube2a
zgc:113054
cog3
adhfe1
stk10
aldob
maea
mff
dclre1a
si:rp71-1g18.1
hnrnpc
hnrnpc
pcmtd2
ei24
lin37
rab24
mccc1
mccc1
arpc4
rbm41
pcna
zgc:77151
ap1g2
si:ch211-198n5.11
slmapa
smg1
mfsd6b
pgpep1
psmb4
uggt1
cuedc1b
lmo4b
pogza
lysmd1
rfc1
anp32e
nucb1
hibch
preb
dgat1b
pds5a
pomt2
rbm4.2
ggnbp2
fam184b
ccnl1a
pim3
ufsp1
fancc
atg9b
atxn7l2a
sypl2a
mcmbp
sun1
cdc16
atf7b
hic1
appb
c1galt1b
foxh1
smtnl
poldip2
ruvbl2
ftr82
gpr161
timm8b
ino80c
ube3a
srm
cnpy4
tex10
nmnat1
lzic
luc7l
nipa2
rangap1b
rca2.1
l3mbtl2
fastkd1
rbms2b
fam3c
dvl2
smndc1
sort1b
atxn7l2b
atpaf2
cyb561a3a
szrd1
ufsp2
usp1
chaf1b
cpvl
pdik1l
spsb1
thoc3
nutf2
ctcf
rpia
nsun2
morc3a
cdk5
cdk5
tmeff1b
phc2a
npm3
med12
sufu
exo1
otud5b
cep63
tbccd1
dbr1
sap130a
tfip11
naca
si:dkeyp-38g8.5
rad9a
ctbp1
dpm1
ran
prep
zmynd11
slc30a9
slc25a16
galnt7
tut1
cmasa
immt
n4bp1
polr3c
cxcr4a
ical1
srsf1a
atl2
ano10a
hells
march7
sap18
mrps31
parp12b
parp12b
dmtf1
parp12b
ints8
uba3
tmf1
ormdl2
hspa14
rprd2a
rpl36a
msna
abi2a
ak3
casp8
nop58
grhl2a
rab35b
ndufab1a
prpf40a
dnaja3a
ap1s2
iqcb1
adrm1
pdp2
abcg2c
dpm3
ilf3a
baz2a
adipor2
cgnb
fzd3b
cast
nudt2
akirin2
ubap1
apc
zgc:113227
cdcp1a
abcc4
txnl4b
haus1
otud5a
mpzl1l
nip7
fbxo7
rragcb
tax1bp3
ciao1
arfip2a
golt1bb
fktn
mepce
hip1rb
uhmk1
nprl2
ubfd1
thumpd3
nt5dc2
kdm2aa
lrp12
fscn1a
flii
nol6
lrrc8c
gpatch8
caska
smpd5
mtmr12
clk2b
fam222ba
eral1
vps16
sdc4
fbxo11a
aimp1
lrrn1
fam155b
mrpl18
d2hgdh
dcaf5
nadkb
mmaa
ash2l
tbl1x
sos2
zdhhc9
sec24c
dgkaa
usp16
senp5
chd2
znf346
stim1a
smg7
slc20a2
mrpl22
setd1ba
anln
adnp2a
mief1
ankfy1
vezf1b
nipblb
dpagt1
c2cd2l
stk36
slc6a4a
dhx34
st14a
vps45
armc7
hexdc
abcc5
lss
znf438
baz1b
trip12
csgalnact2
sec23ip
n4bp2
mrps9
tgfbrap1
slka
nxt2
ctdspl2a
tmem2
ufsp1
wwc3
tmem64
gmnn
spata5l1
neurl1ab
lman2
atp13a2
tmem51b
amotl2a
trpv4
commd4
fbxo10
lap3
adnpa
gse1
dph7
ranbp10
pcm1
narfl
ino80db
armc8
edc4
jarid2b
fan1
zeb2a
leng9
si:ch211-238n5.4
rnf115
hipk3a
sin3b
ulk1a
brat1
coq7
dhx37
dhx37
sept5a
rif1
zc3hc1
oxnad1
nkain4
cep290
socs5b
ecsit
clk2a
fam45a
fam129ba
fbxo18
pnpla7a
alkbh5
anapc7
rpain
gripap1
ndufb9
agpat5
zranb1b
lin54
mtif2
ubap2l
ttc13
lix1l
prcc
r3hdm4
ube2t
myh9a
plbd1
cenpe
srebf2
chd4a
ddx21
galnt11
vps72
zgc:174623
dnajc25
prpf4
kcmf1
pomt1
ptar1
snx18a
itpkcb
pigl
ubc
crfb6
actr8
sh3gl1a
gas1b
purbb
nfu1
slc39a6
ing5b
uqcc1
pak2a
haus6
ccni
pros1
agpat2
gbgt1l4
pnkp
rnf44
atmin
mrps2
ppp1r26
dnlz
psenen
tmem168a
bloc1s3
dclre1b
mettl5
zgc:153372
xrn2
zgc:112962
unc93b1
timm10
si:ch211-216l23.2
cerk
ttc32
ighmbp2
gabpa
vps53
mus81
pard6a
zgc:158868
zswim8
zgc:113314
spryd7b
gpn3
ube2g1b
atg12
zgc:162396
atf7ip
pcgf6
capn5a
ckba
etv5a
dynll2a
zdhhc18a
pnisr
coq3
ska3
cox17
sesn2
zgc:162344
gfer
phf10
ncapg
ctc1
stk11ip
ptpn23a
rpp25l
jtb
vamp3
polh
suz12a
crlf3
sft2d3
arl8bb
rab11fip4b
cbx8b
sec61b
wdyhv1
fam212ab
rbfox2
e2f3
sh3rf1
arid3b
[truncated: 238 more rows]
